# Supplementary material
Source: PubMed Central journal article supplement (PMC5210242)

## ZNF384-related fusion genes define a subgroup of childhood B-cell precursor acute lymphoblastic leukemia with a characteristic immunotype

Shinsuke Hirabayashi,<sup>1,2</sup> Kentaro Ohki,<sup>1</sup> Kazuhiko Nakabayashi,<sup>3</sup> Hitoshi Ichikawa,<sup>4</sup> Yukihide Momozawa,<sup>5</sup> Kohji Okamura,<sup>6</sup> Akinori Yaguchi,<sup>1,7</sup> Kazuki Terada,<sup>1</sup> Yuya Saito,<sup>1,8</sup> Ai Yoshimi,<sup>1,9</sup> Hiroko Ogata-Kawata,<sup>3</sup> Hiromi Sakamoto,<sup>4</sup> Motohiro Kato,<sup>1,10</sup> Junya Fujimura,<sup>7</sup> Moeko Hino,<sup>11</sup> Akitoshi Kinoshita,<sup>12</sup> Harumi Kakuda,<sup>13</sup> Hidemitsu Kurosawa,<sup>14</sup> Keisuke Kato,<sup>9</sup> Ryosuke Kajiwara,<sup>15</sup> Koichi Moriwaki,<sup>16</sup> Tsuyoshi Morimoto,<sup>17</sup> Kozue Nakamura,<sup>18</sup> Yasushi Noguchi,<sup>19</sup> Tomoo Osumi,<sup>1,20</sup> Kazuo Sakashita,<sup>21</sup> Junko Takita,<sup>22</sup> Yuki Yuza,<sup>8</sup> Koich Matsuda,<sup>23</sup> Teruhiko Yoshida,<sup>4</sup> Kenji Matsumoto,<sup>24</sup> Kenichiro Hata,<sup>3</sup> Michiaki Kubo,<sup>5</sup> Yoichi Matsubara,<sup>25</sup> Takashi Fukushima,<sup>26</sup> Katsuyoshi Koh,<sup>27</sup> Atsushi Manabe,<sup>2</sup> Akira Ohara<sup>28</sup> and Nobutaka Kiyokawa<sup>1</sup> for the Tokyo Children's Cancer Study Group (TCCSG)

<sup>1</sup>Department of Pediatric Hematology and Oncology Research, National Research Institute for Child Health and Development, Setagaya-ku, Tokyo; <sup>2</sup>Department of Pediatrics, St. Luke's International Hospital, Chuo-ku, Tokyo; <sup>3</sup>Department of Maternal-Fetal Biology, National Research Institute for Child Health and Development, Setagaya-ku, Tokyo; <sup>4</sup>Division of Genetics, National Cancer Center Research Institute, Chuo-ku, Tokyo; <sup>5</sup>Laboratory for Genotyping Development, Center for Integrative Medical Sciences (IMS), RIKEN, Yokohama-shi, Kanagawa; <sup>6</sup>Department of Systems BioMedicine, National Research Institute for Child Health and Development, Setagaya-ku, Tokyo; <sup>7</sup>Department of Pediatrics and Adolescent Medicine, Juntendo University Graduate School of Medicine, Bunkyo-ku, Tokyo; <sup>8</sup>Department of Hematology/Oncology, Tokyo Metropolitan Children's Medical Center, Fuchu-shi, Tokyo; <sup>9</sup>Division of Pediatric Hematology and Oncology, Ibaraki Children's Hospital, Mito-shi, Ibaraki; <sup>10</sup>Division of Stem Cell Transplant and Cellular Therapy, Children's Cancer Center, National Center for Child Health and Development, Setagaya-ku, Tokyo; <sup>11</sup>Department of Pediatrics, Chiba University Graduate School of Medicine, Chiba-shi, Chiba; <sup>12</sup>Department of Pediatrics, St. Marianna University School of Medicine, Kawasaki-shi, Kanagawa; <sup>13</sup>Department of Haematology/Oncology, Chiba Children's Hospital, Chiba-shi, Chiba; <sup>14</sup>Department of Pediatrics, Dokkyo Medical University, Mibu, Tochigi; <sup>15</sup>Department of Pediatrics, Yokohama City University Hospital, Yokohama-shi, Kanagawa; <sup>16</sup>Department of Pediatrics, Saitama Medical Center, Saitama Medical University, Kawagoe-shi, Saitama; <sup>17</sup>Department of Pediatrics, Tokai University School of Medicine, Isehara-shi, Kanagawa; <sup>18</sup>Department of Pediatrics, Teikyo University School of Medicine, Itabashi-ku, Tokyo; <sup>19</sup>Department of Pediatrics, Japanese Red Cross Narita Hospital, Narita-shi, Chiba; <sup>20</sup>Division of Leukemia and Lymphoma, Children's Cancer Center, National Center for Child Health and Development, Setagaya-ku, Tokyo; <sup>21</sup>Department of Hematology/Oncology, Nagano Children's Hospital, Azumino-shi, Nagano; <sup>22</sup>Department of Pediatrics, Graduate School of Medicine, University of Tokyo, Bunkyo-ku, Tokyo; <sup>23</sup>Laboratory of Clinical Sequence, Department of Computational biology and medical Sciences, Graduate school of Frontier Sciences, The University of Tokyo, Minato-ku, Tokyo; <sup>24</sup>Department of Allergy and Clinical Immunology, National Research Institute for Child Health and Development, Setagaya-ku, Tokyo; <sup>25</sup>National Research Institute for Child Health and Development, Setagaya-ku, Tokyo; <sup>26</sup>Department of Child Health, Faculty of Medicine, University of Tsukuba, Tsukuba-shi, Ibaraki; <sup>27</sup>Department of Hematology/Oncology, Saitama Children's Medical Center, Saitama-shi, Saitama and <sup>28</sup>Department of Pediatrics, Toho University Omori Medical Center, Ohta-ku, Tokyo, Japan

©2017 Ferrata Storti Foundation. This is an open-access paper. doi:10.3324/haematol.2016.151035

Received: June 14, 2016.

Accepted: September 14, 2016.

Pre-published: September 15, 2016.

Correspondence: kiyokawa-n@ncchd.go.jp or oki-kn@ncchd.go.jp

## Supplementary Methods

### Cases

As a result of whole transcriptome sequencing performed after the publication of our previous report<sup>1</sup> on the samples obtained from the cases diagnosed initially as "B-others" enrolled in the L0416/0616 study, we identified one of each minor *BCR-ABL*, *ETV6-RUNX1*, and *TCF3-PBX1*-positive cases and, thus, these 3 cases were removed from the B-others group and re-classified to each category of genetic alteration. As a consequence, 333 ALL patients enrolled in the TCCSG L0416/0616 study included 130 B-others patients and 16 *BCR-ABL*+, 18 *E2A-PBX1*+, 54 *ETV6-RUNX1*+, 3 *MLL-AF4*+, 2 *MLL-AF9*+, 65 hyperdiploid, and 3 hypodiploid (291 BCP-ALL patients) as well as 41 T-ALL and 1 unclassified ALL (Supplementary Table 1).

In addition to the 15 *TCF3-ZNF384*-positive patients presented in the manuscript, we identified 1 more patient harboring *TCF3-ZNF384* (Case26). Case-26 was female, being 5 years old at presentation, and *TCF3-ZNF384* (fusion of *TCF3* Ex13 and *ZNF384* Ex2) was identified in the BM specimen obtained at the 3rd relapse. As additional genetic mutation,

kinase activating point mutation in *FLT3* and *CDKN2A/B* deletion were identified by whole exome sequencing and MLPA, respectively. This patient received SCT as a salvage therapy but died. Since other clinical information of on this patient was not available, she was excluded from our study.

### **Whole transcriptome sequencing and detection of fusion genes**

Total RNAs were extracted using the miRNeasy Mini Kit (Qiagen, Valencia, CA, USA) according to the manufacturer's instruction. After qualification using the Agilent RNA 6000 Nano Kit (Agilent Technologies, Santa Clara, CA, USA), cDNA libraries were prepared from 1 µg of total RNA using the TruSeq RNA sample preparation kit v2 (Illumina, Inc., San Diego, CA, USA, catalog # RS-122-2001). The resultant libraries were quantified using the KAPA Library Quantification Kit (KAPA Biosystems, Inc., Woburn, MA, USA, catalog # KK4835) and checked for quality and size using the Agilent High Sensitivity DNA Kit (Agilent, catalog # 5067-4626). The samples were loaded onto cBot (Illumina) for clustering on a flow cell, and the flow cell was then sequenced using HiSeq2500 (Illumina) according to the manufacturer's instructions. A paired-end (2 x 101) run was performed using the SBS Kit v4-HS (Illumina,

catalog # FC-401-3001). More than 9 Gb of sequence was obtained for each library by paired-end sequencing (126 bp x2).

To avoid multiple counting of each fusion transcript, RNA sequencing data were used after the removal of paired-end reads with the identical nucleotide sequence, which had probably been derived from PCR duplicates during library preparation. For the prediction of fusion genes, the deFuse program<sup>2</sup> was used as described previously.<sup>3</sup> After applying default filtering of this program, potential alternative splicing and read-through products that the program predicted were eliminated, and candidates that had exon boundary junctions were selected.

### **Microarray and data analysis**

The data were normalized by the MAS5 algorithm and the baseline was transformed to the median of all samples. The data were filtered with the following steps. (1) Genes with a signal intensity lower than 1.0 in each sample were eliminated (Filtered on expression). (2) Genes that were scored as absent in all samples were eliminated (Filtered on Flags [Present and Marginal]). (3) For the multi-group comparison between *ZNF384*-related fusion genes



positive ALL and *TCF3-PBX1*-positive or *ZNF384* wild-type ALL, one-way analysis of variance (ANOVA) was conducted selecting probe sets with a *p*-value of <0.01. For the direct comparison between *TCF3-ZNF384*-positive and *TCF3-PBX1*-positive or *ZNF384* wild-type ALL, a moderated t-test was conducted selecting probe sets with a *p*-value of <0.01.

Performing fold-change analysis using filtered genes, genes were selected that exhibited 2.0-fold or more higher or lower expressions in *TCF3-ZNF384*-positive ALL in comparison with *TCF3-PBX1*-positive (Figure 4A, Supplementary Figure 2C, Supplementary Table 6) or *ZNF384* wild-type ALL (Supplementary Figure 2F, Supplementary Tables 8).

For direct multigroup comparison including conventional genetic subtypes and *ZNF384*-related fusion gene positive ALL or B-others, hierarchical clustering analysis was performed on the filtered microarray data using the selected classifying gene probe sets reported by Roberts et al.<sup>4</sup> and Den Boer et al.<sup>5-6</sup> that can separate the major subtypes of pediatric ALL in distinct clusters.

The functional analyses of genes characteristic of *TCF3-ZNF384*-positive ALLs in comparison with *TCF3-PBX1*-positive or *ZNF384* wild-type ALLs were done using gene set enrichment analysis (GSEA) according to the developers instructions

[<http://software.broadinstitute.org/gsea/index.jsp>] as well as previous reports.<sup>7-9</sup> Ranked gene lists of the up- and down-regulated genes in the signatures of *TCF3-ZNF384*-positive ALL (10 cases) in comparison with *TCF3-PBX1*-positive (19 cases) or *ZNF384* wild-type ALL (83 out of 104 cases that located in distinct cluster from *ZNF384*-related fusion genes positive cases by hierarchical clustering) were created. The analysis included gene sets for hematopoietic stage<sup>6</sup> and human immunologic signatures (C7) from MsigDB (<http://software.broadinstitute.org/gsea/index.jsp>). GEO accession number, GSE79533.

### **Exome data analyses: Mapping and variant call**

Sequence reads were trimmed for the adaptor sequence and low quality bases at the ends using cutadapt-1.7.1, and mapped on the 1,000 genomes reference genome sequence (hs37d5) ([ftp://ftp.1000genomes.ebi.ac.uk/vol1/ftp/technical/reference/phase2\\_reference\\_assembly\\_sequence/hs37d5.fa.gz](ftp://ftp.1000genomes.ebi.ac.uk/vol1/ftp/technical/reference/phase2_reference_assembly_sequence/hs37d5.fa.gz)) using bwa-0.7.12. Mapped reads were converted from sam to bam format using samtools-1.2, and processed by picard-tools-1.130 to mark PCR duplicates and fix mate-pair information. GenomeAnalysisTK (GATK)-3.4-46 tools were used to perform local realignment and base recalibration. We preliminarily performed somatic point mutation

calling from matched tumor-normal patient samples based on the results whole exome sequencing data of paired leukemic and normal DNAs from 100 patients with pediatric BCP-ALL and identified 126 genes as candidates for recurrent genetic abnormalities occurred in BCP-ALL (data not shown). Therefore, we filtrated the 126 genes by multi-sample calling for single-nucleotide variants and short insertions/deletions, and the filtration of called variants was carried out by GATK-3.2-2. All of the detected mutations presented in the text were confirmed by Sanger sequencing.

### **Whole transcriptome sequencing data analyses: mapping, variant call, and expression profiling**

Sequence reads were trimmed for adaptor sequence and low-quality bases at the ends using cutadapt-1.2.1, and mapped on the reference genome sequence (hs37d5) using tophat-2.0.7 and bowtie2-2.0.6. Resultant bam files were processed with picard-tools-1.109 to mark PCR duplicates. Variant call was carried out by the GATK Best Practices workflow (<https://www.broadinstitute.org/gatk/guide/article?id=3891>) with slight modifications for the 126 selected genes described in the above section (data not shown). Expression levels of

transcripts were calculated by cufflinks-2.2.1 using bam files. Expression values are shown as expected fragments per kilobase of transcript per million mapped fragments (FPKM). All of the detected mutations presented in the text were confirmed by Sanger sequencing.

### References for Supplement Methods

1. Gocho Y, Kiyokawa N, Ichikawa H, et al. A novel recurrent *EP300-ZNF384* gene fusion in B-cell precursor acute lymphoblastic leukemia. *Leukemia*. 2015;29(12):2445-2448.
2. McPherson A, Hormozdiari F, Zayed A, et al. deFuse: an algorithm for gene fusion discovery in tumor RNA-Seq data. *PLoS Comput Biol*. 2011;7(5):e1001138.
3. Gotoh M, Ichikawa H, Arai E, et al. Comprehensive exploration of novel chimeric transcripts in clear cell renal cell carcinomas using whole transcriptome analysis. *Genes Chromosomes Cancer*. 2014;53(12):1018-1032.
4. Roberts KG, Morin RD, Zhang J, et al. Genetic alterations activating kinase and cytokine receptor signaling in high-risk acute lymphoblastic leukemia. *Cancer Cell*. 2012;22(2):153-166.

5. Den Boer ML, van Slegtenhorst M, De Menezes RX, et al. A subtype of childhood acute lymphoblastic leukaemia with poor treatment outcome: a genome-wide classification study. *Lancet Oncol.* 2009;10(2):125-134.
6. van der Veer A, Waanders E, Pieters R, Willemse ME, et al. Independent prognostic value of BCR-ABL1-like signature and IKZF1 deletion, but not high CRLF2 expression, in children with B-cell precursor ALL. *Blood.* 2013;122(15):2622-2629.
7. Subramanian A, Tamayo P, Mootha VK, et al. Gene set enrichment analysis: a knowledge-based approach for interpreting genome-wide expression profiles. *Proc Natl Acad Sci USA.* 2005;102(43):15545-15550.
8. Mootha VK, Lindgren CM, Eriksson KF, et al. PGC-1alpha-responsive genes involved in oxidative phosphorylation are coordinately downregulated in human diabetes. *Nat Genet.* 2003;34(3):267-273.
9. Laurenti E, Doulatov S, Zandi S, et al. The transcriptional architecture of early human hematopoiesis identifies multilevel control of lymphoid commitment. *Nat Immunol.* 2013;14(7):756-763.

**Supplementary Table 1. Summary of the cases and detected *ZNF384*-related fusion genes.**

**Supplementary Table 2. Primer sequences for RT-PCR.**

**Supplementary Table 3. Summary of the results of detected *ZNF384*-related fusion genes by whole transcriptome sequencing.**

**Supplementary Table 4. Clinical characteristics of patients with *EP300-ZNF384* fusion gene identified in this study.**

**Supplementary Table 5. Immunophenotypes of BCP-ALL cases with *ZNF384*-related fusion genes and *TCF3-PBX1*.**

**Supplementary Table 6. Direct comparison of up- and down-regulated genes between**

***TCF3-ZNF384-* and *TCF3-PBX1*-positive ALL.**

**Supplementary Table 7. Gene set enrichment analysis between *TCF3-ZNF384-* and**

***TCF3-PBX1*-positive or *ZNF384* wild-type ALL using the gene set enriched in**

**hematopoietic stages and human immunologic signatures.**

**Supplementary Table 8. Direct comparison of up- and down-regulated genes between**

***TCF3-ZNF384-* and *ZNF384* wild-type ALL.**

**Supplementary Table 1.** Summary of the cases and detected *ZNF384*-related fusion genes.

|                   |                   | B-others*                                       |                         |                          |                           |                          |                          |                     | BCP-ALL with conventional genetic abnormalities |                        |                      |                       |                     |                     |                     |      | T-ALL | Unclassified | Total |         |
|-------------------|-------------------|-------------------------------------------------|-------------------------|--------------------------|---------------------------|--------------------------|--------------------------|---------------------|-------------------------------------------------|------------------------|----------------------|-----------------------|---------------------|---------------------|---------------------|------|-------|--------------|-------|---------|
|                   |                   | <i>ZNF384</i><br>Total                          | <i>TCF3-<br/>ZNF384</i> | <i>TAF15-<br/>ZNF384</i> | <i>CREBBP-<br/>ZNF384</i> | <i>BMP2K-<br/>ZNF384</i> | <i>EP300-<br/>ZNF384</i> | Hyperdiploid<br>>51 | Hypodiploid<br><40                              | <i>ETV6-<br/>RUNX1</i> | <i>BCR-<br/>ABL1</i> | <i>TCF3-<br/>PBX1</i> | <i>MLL-<br/>AF4</i> | <i>MLL-<br/>AF9</i> | <i>MLL-<br/>ENL</i> |      |       |              |       |         |
| L0416/L0616       | Registered        | 130                                             |                         |                          |                           |                          |                          |                     |                                                 |                        |                      |                       |                     |                     |                     |      |       |              |       |         |
| 2004.Nov-2007.Mar | Analyzed (RNAseq) | 121 ( 35 )                                      | 12 ( 6 )                | 7 ( 3 )                  | 1 ( 1 )                   | 1 ( 1 )                  | 0 ( 0 )                  | 3 ( 1 )**3          | 161                                             | 65                     | 3                    | 54                    | 16                  | 18                  | 3                   | 2    | 0     | 41           | 1     | 333 *** |
|                   | Frequency         | (93.1% registered)<br>In B-others<br>In BCP-ALL | 9.2%<br>4.1%            | 5.4%<br>2.4%             | 0.8%<br>0.3%              | 0.8%<br>0.3%             | 0.0%<br>0.0%             | 2.3%<br>1.0%        |                                                 | 22.3%                  | 1.0%                 | 18.6%                 | 5.5%                | 6.2%                | 1.0%                | 0.7% | 0.0%  |              |       |         |
| L07-1602          | Registered        | 121                                             |                         |                          |                           |                          |                          |                     |                                                 |                        |                      |                       |                     |                     |                     |      |       |              |       | 274     |
| 2007.Apr-2009.May | Analyzed (RNAseq) | 43 ( 26 )                                       | 7 ( 1 )                 | 2 ( 0 )                  | 1 ( 0 )                   | 2 ( 1 )                  | 0 ( 0 )                  | 2 ( 0 )             |                                                 |                        |                      |                       |                     |                     |                     |      |       |              |       |         |
| L09-1603          | Registered        | 300                                             |                         |                          |                           |                          |                          |                     |                                                 |                        |                      |                       |                     |                     |                     |      |       |              |       | 607     |
| 2009.Jun-2013.Jun | Analyzed (RNAseq) | 57 ( 34 )                                       | 5 ( 0 )                 | 3 ( 0 )                  | 0 ( 0 )                   | 0 ( 0 )                  | 0 ( 0 )                  | 2 ( 0 )**1          |                                                 |                        |                      |                       |                     |                     |                     |      |       |              |       |         |
| Others            | Analyzed (RNAseq) | 51 ( 51 )                                       | 7 ( 6 )                 | 3 ( 3 )                  | 1 ( 1 )                   | 0 ( 0 )                  | 1 ( 1 )                  | 2 ( 1 )**2          |                                                 |                        |                      |                       |                     |                     |                     |      |       |              |       |         |
| Total             | Analyzed (RNAseq) | 272 ( 146 )                                     | 31 ( 13 )               | 15 ( 6 )                 | 3 ( 2 )                   | 3 ( 2 )                  | 1 ( 1 )                  | 9 ( 2 )             |                                                 |                        |                      |                       |                     |                     |                     |      |       |              |       |         |
|                   | Frequency         | In B-others                                     | 11.4%                   | 5.5%                     | 1.1%                      | 1.1%                     | 0.4%                     | 3.3%                |                                                 |                        |                      |                       |                     |                     |                     |      |       |              |       |         |

\*B-others, BCP-ALL w/o conventional genetic abnormalities

\*\*Including 6 cases sited from Gocho et al., 2015

\*\*\*After the publication of our previous manuscript (Gocho et al., 2015), we identified 1 case each of *ETV6-RUNX1*, *TCF3-ZNF384*, and *BCR-ABL1* in "B-others" cases by RNAseq.



**Supplementary Table 2.** Primer sequences for RT-PCR.

| Fusion gene          | Direction | Nucleotide                   |
|----------------------|-----------|------------------------------|
| <i>TCF3-ZNF384</i>   | Forward-1 | 5'-CAGCCTCATGCACAACCAC-3'    |
| <i>TCF3-ZNF384</i>   | Reverse-1 | 5'-CCAGTGTGGATTCGTGTGTG-3'   |
| <i>TCF3-ZNF384</i>   | Forward-2 | 5'-CAGCTCAGGTGAGGACTAC -3'   |
| <i>TCF3-ZNF384</i>   | Reverse-2 | 5'-ACAGCCCTTCTCTGGCAAC-3'    |
| <i>TAF15-ZNF384</i>  | Forward   | 5'-GGAAGCCAAGGTGGAAGAG-3'    |
| <i>TAF15-ZNF384</i>  | Reverse   | 5'-ACAGCCCTTCTCTGGCAAC-3'    |
| <i>CREBBP-ZNF384</i> | Forward   | 5'-CTCTCGGACTCCCCTACATGA- 3' |
| <i>CREBBP-ZNF384</i> | Reverse   | 5'-TCAGCAAGGTGGGGTAGTGA- 3'  |
| <i>BMP2K-ZNF384</i>  | Forward   | 5'-TCAGCCGTCTCAACAACAGG- 3'  |
| <i>BMP2K-ZNF384</i>  | Reverse   | 5'-TGTGGGGATAGAAGGCCAGA- 3'  |

**Supplementary Table 3.** Summary of the results of detected *ZNF384*-related fusion genes by whole transcriptome sequencing.

| Gene_name1    | Gene_name2      | Case ID | 5'-Partner gene accession No. | Chromosome, genomic position of fusion splice/breakpoint | 3'-Partner gene accession No. | Chromosome, genomic position of fusion splice/breakpoint | Flanking sequences                                                                                                                                                                                                                                                                                                                                                                                                                                                                                                                                                                                                                                                                                                                                                                                                                                                                                                                                                                                                                                                                                                                                                                                                                                                                                                                                                                                                                                                                                                                                                                                                                                                                                                                                                                                                                            | Gene locations  |
|---------------|-----------------|---------|-------------------------------|----------------------------------------------------------|-------------------------------|----------------------------------------------------------|-----------------------------------------------------------------------------------------------------------------------------------------------------------------------------------------------------------------------------------------------------------------------------------------------------------------------------------------------------------------------------------------------------------------------------------------------------------------------------------------------------------------------------------------------------------------------------------------------------------------------------------------------------------------------------------------------------------------------------------------------------------------------------------------------------------------------------------------------------------------------------------------------------------------------------------------------------------------------------------------------------------------------------------------------------------------------------------------------------------------------------------------------------------------------------------------------------------------------------------------------------------------------------------------------------------------------------------------------------------------------------------------------------------------------------------------------------------------------------------------------------------------------------------------------------------------------------------------------------------------------------------------------------------------------------------------------------------------------------------------------------------------------------------------------------------------------------------------------|-----------------|
| <i>ZNF384</i> | - <i>TCF3</i>   | Case-4  | NM_133476.4                   | ch 12 , 6,797,350                                        | NM_003200.3                   | ch 19 , 1,620,973                                        | GCTATTTCCCTCCCTCCCCCTTTTCGTTTCGGGCGCTCCCGCCTTCTCTC<br>CGCAGAGCTTCTCTGAGCCTGTTGGGGGAGGGAGGGGGCGTGGA<br>GGAAGTGGGTTTCGCGGGAGCACGAGCTGCAGCACCCTTCCGAAAAGT<br>TCAGGAGCCCTGAAAGGAGAAGGAATAAGACGGCAGG CTGGCAGAAC<br>GTCACAGTGGCCTCGAGCAGGAGCCCCGGTGCCTTATCGCCCAGCTACG<br>ACGGGGGTCTCCACGGCCTGCAGAGTAAGATAGAAGACCCTGGACGAG<br>GCCATCCACGTGCTCCGCAGCCAGCCGTGGGCACAGCCGGCGACATGC<br>ACACGCTGCTGCCTGGCCACGGGGCGCTGGCCTCAGGTTTACCCGGCCC<br>CATGTCACTGGGCGGGCGGCACGCAGGCCTGGTTGGAGGCAGCCACCCC<br>GAGGACGGCCTCGCAGGCAGCA<br>CCGCCCGGTAGCGGCCCGGTGGGCAGCAGTGGAAGCAGCAGCACGTTTG<br>GTGGCCTGCACCAGCACGAGCGTATGGTAGGCCAGGGCAGGGGGCAG<br>GGGGTGGGCGGAGGGTGGCAGTGCCCATCTAACCACCCCTCCTCCTGCC<br>TGACCCCCAGGGCTACCAGCTGCATGGAGCAGAGGTGAACGGTGGGCT<br>CCCATCTGCATCCTCTTCTCCTCAGCCCCGGAGCCACGTACGGCGGCG<br>TCTCCAGCCACACGCGCCCTGTGAGCGGGGCCGACAGCCTCCTG GGTGA<br>AATGGAAGAATCTCACTTCAATTCTAACCCTACTTCTGGCCTTCTATCCCC<br>ACAGTCTCAGGTGAGGTAAGTGGTGTGCTTTCTTCTCTCTCCAAGTCTC<br>AGTAGTAAGTTCTGTTACTATGAGACTGAAGGTACACCACATGCTGTTTA<br>CTGGGTCCCCCACCCTGAGAATTATCTAGTGTTCCTGCCTGGGCTTCTCT<br>CTAGAAGGCCAGAGGTATGAAGTGCTCATCCTTGATCCCTAAGGAGGACAG<br>ACACTGAAGTGTGCTCAGCAGC<br>CCGCCCTTCTACGTGGCAGATGGCAGCCTGCACCCCTCAGCCGAGCTC<br>TGGAGTCCCCCGGGCCAGGCGGGCTTCGGGCCATGCTGGGTGGGGC<br>TCATCCCCGCTGCCCTCCCGCCCGTAGCGGCCCGGTGGGCAGCAGTG<br>GAAGCAGCAGCACGTTTGGTGGCCTGCACCAGCAGCAGCGTATGGGCTAC<br>CAGCTGCATGGAGCAGAGGTGAACGGTGGGCTCCCATCTGCATCCTCCTT<br>CTCCTCAGCCCCGGAGCCACGTACGGCGGCCTCCAGCCACACGCCG<br>CCTGTGAGCGGGCCGACAGCCTCCTGGG TGAATGGAAGAATCTCACTT<br>CAATTCTAACCCTACTTCTGGCCTTCTATCCCCACAGTCTCAGGTGAGATC<br>GAGAACACAATGTTTCATCAACAAGATGAAGGATCAGCTGTTGCCAGAGAAG<br>GGCTGTGGTCTGGCCCCACCTCACTACCCACCTTGCTGACAGTGCCTGC<br>CTCAGTGTCCCTGCCCTCAGGCATCAGTATGGACACAGAGTCCAAGTCAG<br>ACCAGCTGACCCACACAGCCAAGCGTCCGTTACCCAGAATATCACGGT<br>GTCCTGTGCCGTCTACAGGACTGATGACTGCT | utr5p   coding  |
| <i>TCF3</i>   | - <i>ZNF384</i> | Case-4  | NM_003200.3                   | ch 19 , 1,621,837                                        | NM_133476.4                   | ch 12 , 6,788,691                                        | AATGGAAGAATCTCACTTCAATTCTAACCCTACTTCTGGCCTTCTATCCCC<br>ACAGTCTCAGGTGAGGTAAGTGGTGTGCTTTCTTCTCTCTCCAAGTCTC<br>AGTAGTAAGTTCTGTTACTATGAGACTGAAGGTACACCACATGCTGTTTA<br>CTGGGTCCCCCACCCTGAGAATTATCTAGTGTTCCTGCCTGGGCTTCTCT<br>CTAGAAGGCCAGAGGTATGAAGTGCTCATCCTTGATCCCTAAGGAGGACAG<br>ACACTGAAGTGTGCTCAGCAGC<br>CCGCCCTTCTACGTGGCAGATGGCAGCCTGCACCCCTCAGCCGAGCTC<br>TGGAGTCCCCCGGGCCAGGCGGGCTTCGGGCCATGCTGGGTGGGGC<br>TCATCCCCGCTGCCCTCCCGCCCGTAGCGGCCCGGTGGGCAGCAGTG<br>GAAGCAGCAGCACGTTTGGTGGCCTGCACCAGCAGCAGCGTATGGGCTAC<br>CAGCTGCATGGAGCAGAGGTGAACGGTGGGCTCCCATCTGCATCCTCCTT<br>CTCCTCAGCCCCGGAGCCACGTACGGCGGCCTCCAGCCACACGCCG<br>CCTGTGAGCGGGCCGACAGCCTCCTGGG TGAATGGAAGAATCTCACTT<br>CAATTCTAACCCTACTTCTGGCCTTCTATCCCCACAGTCTCAGGTGAGATC<br>GAGAACACAATGTTTCATCAACAAGATGAAGGATCAGCTGTTGCCAGAGAAG<br>GGCTGTGGTCTGGCCCCACCTCACTACCCACCTTGCTGACAGTGCCTGC<br>CTCAGTGTCCCTGCCCTCAGGCATCAGTATGGACACAGAGTCCAAGTCAG<br>ACCAGCTGACCCACACAGCCAAGCGTCCGTTACCCAGAATATCACGGT<br>GTCCTGTGCCGTCTACAGGACTGATGACTGCT                                                                                                                                                                                                                                                                                                                                                                                                                                                                                                                                                                                                                                                                                                                                                                                                                                           | coding   intron |
| <i>TCF3</i>   | - <i>ZNF384</i> | Case-4  | NM_003200.3                   | ch 19 , 1,621,837                                        | NM_133476.4                   | ch 12 , 6,788,691                                        | AATGGAAGAATCTCACTTCAATTCTAACCCTACTTCTGGCCTTCTATCCCC<br>ACAGTCTCAGGTGAGGTAAGTGGTGTGCTTTCTTCTCTCTCCAAGTCTC<br>AGTAGTAAGTTCTGTTACTATGAGACTGAAGGTACACCACATGCTGTTTA<br>CTGGGTCCCCCACCCTGAGAATTATCTAGTGTTCCTGCCTGGGCTTCTCT<br>CTAGAAGGCCAGAGGTATGAAGTGCTCATCCTTGATCCCTAAGGAGGACAG<br>ACACTGAAGTGTGCTCAGCAGC<br>CCGCCCTTCTACGTGGCAGATGGCAGCCTGCACCCCTCAGCCGAGCTC<br>TGGAGTCCCCCGGGCCAGGCGGGCTTCGGGCCATGCTGGGTGGGGC<br>TCATCCCCGCTGCCCTCCCGCCCGTAGCGGCCCGGTGGGCAGCAGTG<br>GAAGCAGCAGCACGTTTGGTGGCCTGCACCAGCAGCAGCGTATGGGCTAC<br>CAGCTGCATGGAGCAGAGGTGAACGGTGGGCTCCCATCTGCATCCTCCTT<br>CTCCTCAGCCCCGGAGCCACGTACGGCGGCCTCCAGCCACACGCCG<br>CCTGTGAGCGGGCCGACAGCCTCCTGGG TGAATGGAAGAATCTCACTT<br>CAATTCTAACCCTACTTCTGGCCTTCTATCCCCACAGTCTCAGGTGAGATC<br>GAGAACACAATGTTTCATCAACAAGATGAAGGATCAGCTGTTGCCAGAGAAG<br>GGCTGTGGTCTGGCCCCACCTCACTACCCACCTTGCTGACAGTGCCTGC<br>CTCAGTGTCCCTGCCCTCAGGCATCAGTATGGACACAGAGTCCAAGTCAG<br>ACCAGCTGACCCACACAGCCAAGCGTCCGTTACCCAGAATATCACGGT<br>GTCCTGTGCCGTCTACAGGACTGATGACTGCT                                                                                                                                                                                                                                                                                                                                                                                                                                                                                                                                                                                                                                                                                                                                                                                                                                           | coding   utr5p  |

|      |          |        |             |         |           |             |         |           |        |        |
|------|----------|--------|-------------|---------|-----------|-------------|---------|-----------|--------|--------|
| TCF3 | - ZNF384 | Case-4 | NM_003200.3 | ch 19 , | 1,619,457 | NM_133476.4 | ch 12 , | 6,788,342 | coding | coding |
| TCF3 | - ZNF384 | Case-4 | NM_003200.3 | ch 19 , | 1,621,188 | NM_133476.4 | ch 12 , | 6,797,335 | coding | utr5p  |
| TCF3 | - ZNF384 | Case-4 | NM_003200.3 | ch 19 , | 1,620,972 | NM_133476.4 | ch 12 , | 6,796,284 | coding | intron |
| TCF3 | - ZNF384 | Case-5 | NM_003200.3 | ch 19 , | 1,619,852 | NM_133476.4 | ch 12 , | 6,788,222 | coding | coding |

GCGGCCCGTGGGCAGCAGTGAAGCAGCAGCACGTTTGGTGGCCTGCA  
 CCAGCACGAGCGTATGGGCTACCAGCTGCATGGAGCAGAGGTGAACGGTG  
 GGCTCCCATCTGCATCCTCCTCAGCCCCGGAGCCACGTACGGC  
 GGCGTCTCCAGCCACACGCCGCTGTACGGGGCCGACAGCCCTCTGG  
 GCTCCCGAGGGACCACAGCTGGCAGCTCCGGGATGCCCTCGGCAAAGC  
 ACTGGCCTCGATCTACTCCCGGATCACTCAAGCAATAAATTCTCGTCCAG  
 CCCTTACACCCCGTGGGCTCCCCAGGGCCTGGCAGGAACGTACACAG  
 TGGCCTCGAGCAGGAGCCCCGGTGCCTTATCGCCAGCTACGACGGGG  
 GTCTCCACGGCCTGCAGAGTAAGATAGAAGAJACACAATGTTTCATCAACAAG  
 ATGAAGGATCAGCTGTTGCCAGAGAAGGGCTGTGGTCTGGCCCCACCTCA  
 CTACCCACCTTGCTGACAGTGCCTGCCTCAGTGTCCCTGCCCTCAGGCA  
 TCAGTATGGACACAGAGTCCAAGTCAGACCAGCTGACCCACACAGCCAA  
 GCGTCCGTTACCCAGAATATCACGGTGGTCCCTGTGCCGTCTACAGGACTG  
 ATGACTGCTGGAGTCTCTGTTCTCAGAGGTGGAGAAGAGAAGGGAGTCA  
 ATCAAGGGGTCCGGGTTTGGTAATCACGTCCCCCTCAGGCTCTCTTGTGAC  
 CACAGCATCATCAGCTCAGACCTTCCCATTTCCGCTCCCATGATTGTCTCA  
 GCTTTCCCCCTGGCTCACAAGCCCTGCAGGTTGTCCCTGACCTCTCCAA  
 GAAGGTAGCATCGACCCTAACCGAGGAAGGAGGGCGGAGGTGGTGGTGA  
 GGTGGCAGTGT  
 GACACGCAGCCCAAGAAGGTCCGGAAGTCCCGCCGGGTCTTCCATCCT  
 CGGTGTACCCACCCAGCTCAGGTGAGGACTACGGCAGGGATGCCACCGC  
 CTACCCGTCCGCCAAGACCCCAAGCAGCACCTATCCCGCCCCCTTCTACG  
 TGGCAGATGGCAGCCTGCACCCCTCAGCCGAGCTGGAGTCCCCCGGG  
 CCAGCGGGCTTCCGGCCATGCTGGGTGGGGCTCATCCCGCTGCC  
 CTCCCGCCGGTAGCGGCCGGTGGGCAGCAGTGAAGCAGCAGCACGT  
 TTGGTGGCCTGCACAGCAGCAGCGTATGGGCTACCAGCTGCATGGAGCA  
 GAGGTGAACGGTGGGCTCCCATCTGCATCCTCCTTCTCAGCCCCGG  
 AGCCACGTACGGCGGCTCTCCAGCCACACGCCGCTGTACGGGGCC  
 GACAGCCTCCTGGGCTJAGGAATGAAGAATCTCACTTCAATTCAACCCGT  
 ACTTCTGGCCTTCTATCCCAAGTCTCAGGTGAGTGCAGAACACAATGT  
 TCATCAACAAGATGAAGGATCAGCTGTTGCCAGAGAAGGGCTGTGGTCTG  
 GCCCACCTCACTACCCACCTTGCTGACAGTGCCTGCCTCAGTGTCCCT  
 GCCCTCAGGCATCAGTATGGACACAGAGTCCAAGTCAGACCAGCTGACCC  
 CACACAGCCAAGCGTCCGTTACCCAGAATATCACGGTGGTCCCTGTGCC  
 TCTACAGGACTGATGACTGC  
 CTGGTGTGCTGCCTGCGAGGCCGCTCCTCGGGGTGGCTGCCTCCAACAGGC  
 CTGCGTGCCGCCGCCAGTGCATGGGGCCGGTGAACCTGAGGCCAG  
 CGCCCCGTGGCCAGGCAGCAGCGTGTGCATGTGCCGGCTGTGCCACG  
 GCGTGGCTGCCGAGCACGTGGATGGCTCGTCCAGGTGGTCTTCTATCTT  
 ACTCTGCAGGCCGTGGAGACCCCGTCTGAGTGGGGCATAAGGCACCG  
 GGGGCTCTGCTCGAGGCCACTGTGACGTTCTGCAAGCCATCCAGTA  
 GGATGTGACGCTTTCCCGCCAGTATCCATAAACTCTTCCAAGTACAAGTAAC  
 TCAGAACTAAACAGGACTGCTACCACACACAGCTGGCAACCTGGGCCAA  
 CAGCTTCTAGCCTGGGCACACCGGACCACTTTACCCTGCATCCTGTGGG  
 AGGACGGCAGCGTGGTTCTCCTTGCCCTGTCTGTTCCACTATAAATGATG  
 GATCTGGGAATGTGAGGCCAAAATAAATAAAGACTGGAGAAGAAGAG  
 ATATGTACCAATATTTAATCAACAACCTTGGCTCAGAAA  
 GCCCCGTGGGCAGCAGTGAAGCAGCAGCACGTTTGGTGGCCTGCACCA  
 GCACGAGCGTATGGGCTACCAGCTGCATGGAGCAGAGGTGAACGGTGGG  
 CTCCATCTGCATCCTCCTTCTCCTCAGCCCCGGAGCCACGTACGGCCG  
 CGTCTCCAGCCACACGCCGCTGTACGCGGGCCGACAGCCTCCTGGGG  
 TCCCGAGGACCAACAGCTGGCAGCTCCGGGATGCCCTCGGCAAAGCAC  
 TGGCCTCGATCTACTCCCGGATCACTCAAGCAATAAATTCTCGTCCAGCC  
 CTCTACCCCGTGGGCTCCCCAGGGCCTGGCAGGJTCAGTATGGACA  
 CAGAGTCCAAGTGCAGACAGCTGACCCACACAGCCAAAGCGTCCGTACCC  
 CAGAATATCACGGTGGTCCCTGTGCCGTCTACAGGACTGATGACTGCTGGA  
 GTCTCCTGTTCTCAGAGGTGGAGAAGAGAAGGGAGTCAATCAAGGGGTCC  
 GGGTTTGGTAATCACGTCCCCCTCAGGCTCTCTTGTGACCACAGCATCATC  
 AGCTCAGACCTTCCCATTTCCGGCTCCCATGATTGTCTCAGCTCTCCCCC  
 TGGCTCACAAGCCCTGCAGGTTGTCCCTGACCTCTCCAAGAAGGTAGCAT  
 CGACCCCT

|        |          |        |             |         |           |             |         |           |        |        |
|--------|----------|--------|-------------|---------|-----------|-------------|---------|-----------|--------|--------|
| ZNF384 | - TCF3   | Case-5 | NM_133476.4 | ch 12 , | 6,797,335 | NM_003200.3 | ch 19 , | 1,620,965 | utr5p  | intron |
| ZNF384 | - TCF3   | Case-5 | NM_133476.4 | ch 12 , | 6,797,333 | NM_003200.3 | ch 19 , | 1,619,852 | utr5p  | coding |
| TCF3   | - ZNF384 | Case-5 | NM_003200.3 | ch 19 , | 1,620,967 | NM_133476.4 | ch 12 , | 6,788,691 | coding | utr5p  |
| TCF3   | - ZNF384 | Case-5 | NM_003200.3 | ch 19 , | 1,620,967 | NM_133476.4 | ch 12 , | 6,788,691 | coding | utr5p  |
| TCF3   | - ZNF384 | Case-5 | NM_003200.3 | ch 19 , | 1,620,967 | NM_133476.4 | ch 12 , | 6,788,691 | intron | utr5p  |

TCCACCTCTGAGAACAGGAGACTCCAGCAGTCATCAGTCCTGTAGACGGC  
ACAGGGACCACCGTGATATTCTGGGTAACGGACGCTTGGCTGTGTGGGGT  
CAGCTGGTCTGACTTGGACTCTGTGTCCATACTGATGCCAGAGGGCAGGG  
ACACTGAGGCAGGCACTGTCAGCAAGGTGGGGTAGTGAGGTGGGGCAG  
ACCACAGCCCTTCTCTGGCAACAGCTGATCCTTCATCTTGTGATGAACATT  
GTGTTCTCGATCTGACCTGAGACTGTGGGGATAGAAAGCCAGAAAGTACGG  
GTTAGAATTGAAGTGAGATTCTCCATTCTCTACCTGCCAGGCCCTGGGGG  
GAGCCACGGGGGTAGAAGGGCTGGACGAGAAGTTATTGCTTGAGTGATC  
CGGGGAGTAGATCTGCGAGGAGGACCAGGAGAGATGGGGCGTCAGGGGC  
CGGCCTCAGGTCACTTGCCTGGCCACCCCCATGCCACGCCTCACC  
GAGGCCAGTGCTTGGCCGAGGGCATCCCCGAGCTGCCAGCTGTGGTCC  
CTCGGGAGCCTGTGGTGAAGAGAGGTGAGGCCACGCAGCCCGGCCT  
GGGT  
GTGACTCGGCTTCTGCACGCCCTTCTTCCATTAGCGCCCCCTACAT  
TGCTATTTCCCTCCCTCCCCCTTTTCGTTCCGGCGCTCCCGCTTCTCT  
CCGCAGAGCTTTCTCTGAGCCTGTTGGGGGAGGGAGGGGGCGTGA  
GAACTGGGGTTCGCGGGAGCACGAGCTGCAGCACCCTTCCGGAAAGT  
TCAGGAGCCCTGAAAGGAGAAGGAATAAGACGGCAGGAGGAAGAGAGA  
GAGAGGGJAACGTACAGTGGCCTCAGCAGGAGCCCCGGTGCCTTATC  
GCCAGCTACGACGGGGTCTCCACGGCTGCAGAGTAAGATAGAAGACC  
ACCTGGACGAGGCCATCCACGTGCTCCGCAGCCACGCCGTGGGCACAGC  
CGGCAGATGCACACGCTGCTGCTGGCCACGGGGCGCTGGCCTCAGGT  
TTCACCGGCCCATGCTACTGGCGGGCGGCACGCAGGCCTGTTGGAG  
GCAGCCACCCGAGGACGGCTCGCAGGCAGCACAGCC  
CCCCGTAGCGGCCCGTGGGCAGCAGTGAAGCAGCAGCAGCTTTGGTG  
GCCTGCACAGCAGAGCGTATGGGCTACAGCTGCATGGAGCAGAGGTG  
AACGGTGGGCTCCCATCTGCATCCTCTTCTCCTCAGCCCCGGAGCCAC  
GTACGGCGGGCTTCCAGCCACACGCCCTGTCCAGCGGGCCGACAGC  
CTCCTGGGCTCCCGAGGGACACAGCTGGCAGCTCCGGGATGCCCTCG  
GCAAAGCACTGGCCTCGATTCTACTCCCCGGATCACTAAGCAATAACTTCT  
CGTCCAGCCCTTACCCCCGTGGGCTCCCCCAGGGCTGGCAGG|TAG  
AATGGAAGAATCTCACTTCAATTTAACCCTGACTTCTGGCTTCTATCCCC  
ACAGTCTCAGGTTCAGATCGAGAACAATGTTTCATCAACAAGATGAAGGAT  
CAGCTGTTGCCAGAGAAGGGCTGTGGTCTGGCCCCACCTACTACCCAC  
CTTGCTGACAGTGCCTGCCTCAGTGTCCCTGCCCTCAGGCATCAGTATGG  
ACACAGAGTCCAAGTCAGACCAGCTGACCCACACAGCCAAGCGTCCGTT  
ACCCAGAATATCACGGTGGTCCCTGTGCCGTCTACAGGACTGAT  
TGCACCAGCACGAGCTATGGGCTACCAGCTGCATGGAGCAGAGGTGAAC  
GGTGGGCTCCCATCTGCATCCTCTTCTCCTCAGCCCCGGAGCCAGTA  
CGGCCGGCTCCTCAGCCACACGCCGCTGTAGCGGGGCCGACAGCCTC  
CTGGGCTCCCGAGGGACACAGCTGGCAGCTCCGGGATGCCCTCGGCA  
AAGCACTGGCCTCGATCTACTCCCCGGATCACTAAGCAATAACTTCTCGT  
CCAGCCCTTCTACCCCCGTGGGCTCCCCCAGGGCTGGCAGG|TAGAAT  
GGAAGAATCTCACTTCAATTTAACCCTGACTTCTGGCTTCTATCCCCACA  
GTCTCAGGTTCAGATCGAGAACAATGTTTCATCAACAAGATGAAGGATCAG  
CTGTTGCCAGAGAAGGGCTGTGGTCTGGCCCCACCTACTACCCACCTT  
GCTGACAGTGCCTGCCTCAGTGTCCCTGCCCTCAGGCATCAGTATGGACA  
CAGAGTCCAAGTCAGACCAGCTGACCCACACAGCCAAGCGTCCGTTACC  
CAGAATATCACGGTGGTCCCTGTGCCGTCTACAGGACTGATGACTGCTGGA  
GCAGAACGCAGGAGAGCTTGGCTCGGGCGCAGCACCCAGGCCGGGCT  
GCCTGGGCTCACCTCTTACCCACAGGCTCCCGAGGGACACAGCT  
GGCAGCTCCGGGATGCCCTCGGCAAGCACTGGCCTCGGTGAGGCGTG  
GGGCATGGGGGTGGCCAGGCAAGTACCTGAGAGGGCCGGCCCTGAC  
CGCCATCTCTCTGGTCTCCTCGCAGATCTACTCCCCGGATCACTAAG  
CAATAACTTCTCGTCCAGCCCTTCTACCCCGTGGGCTCCCCCAGGGCC  
TGGCAGG|TAGAATGGAAGAATCTCACTTCAATTTAACCCTGACTTCTGGC  
CTTCTATCCCCACAGTCTCAGGTGAGGTAAGTGGTGTGCTTCTTGTCTCT  
CTCCAAGTCTCAGTAGTAAGTTCTGTTACTATGGAGACTGAAGGTACACCAC  
ATGCTGTTTACTGGTCCCCCACCCTGAGAATATCTAGTGTCTTCTGCCT  
GGGCTTCTCTAGAAGGCCAGAGGTATGAAGTGTCTATCCTTGATCCCTA  
AGGAG





|                                                                                                                                                                                                                                                                                                                                                                                                                                                                                                                                                                                                                                                                                                                                                                                                                                                                                                                                                                                                                                                                                                                                                                                                                                                                                                                                                                                                                                                                                                                                                                                                                                                                                                                                                                                                                                                                                                                                                                                                                                                                                                                                                                                                                                                                                                                                                                                                                                                                                                                                                                                                                                                                                                                                                                                                                                                                                                                                      |       |   |        |         |             |         |            |             |         |           |  |        |  |        |
|--------------------------------------------------------------------------------------------------------------------------------------------------------------------------------------------------------------------------------------------------------------------------------------------------------------------------------------------------------------------------------------------------------------------------------------------------------------------------------------------------------------------------------------------------------------------------------------------------------------------------------------------------------------------------------------------------------------------------------------------------------------------------------------------------------------------------------------------------------------------------------------------------------------------------------------------------------------------------------------------------------------------------------------------------------------------------------------------------------------------------------------------------------------------------------------------------------------------------------------------------------------------------------------------------------------------------------------------------------------------------------------------------------------------------------------------------------------------------------------------------------------------------------------------------------------------------------------------------------------------------------------------------------------------------------------------------------------------------------------------------------------------------------------------------------------------------------------------------------------------------------------------------------------------------------------------------------------------------------------------------------------------------------------------------------------------------------------------------------------------------------------------------------------------------------------------------------------------------------------------------------------------------------------------------------------------------------------------------------------------------------------------------------------------------------------------------------------------------------------------------------------------------------------------------------------------------------------------------------------------------------------------------------------------------------------------------------------------------------------------------------------------------------------------------------------------------------------------------------------------------------------------------------------------------------------|-------|---|--------|---------|-------------|---------|------------|-------------|---------|-----------|--|--------|--|--------|
| 2                                                                                                                                                                                                                                                                                                                                                                                                                                                                                                                                                                                                                                                                                                                                                                                                                                                                                                                                                                                                                                                                                                                                                                                                                                                                                                                                                                                                                                                                                                                                                                                                                                                                                                                                                                                                                                                                                                                                                                                                                                                                                                                                                                                                                                                                                                                                                                                                                                                                                                                                                                                                                                                                                                                                                                                                                                                                                                                                    | TCF3  | - | ZNF384 | Case-15 | NM_003200.3 | ch 19 , | 1,620,967  | NM_133476.4 | ch 12 , | 6,797,392 |  |        |  |        |
| <p>ATGGAGCAGAGGTGAACGGTGGGCTCCCATCTGCATCCTCCTTCTCCTCA<br/> GCCCGGGAGCCACGTACGGGGCGTCTCCAGCCACACGCCGCTGTCA<br/> GCGGGGCCGACAGCCTCCTGGGCTCCCGAGGGACCACAGCTGGCAGCT<br/> CCGGGGATGCCCTCGGCAAAGCACTGGCCTCGATCTACTCCCGGATCAC<br/> TCAAGCAATAACTTCTCGTCCAGCCTTCTACCCCGTGGGCTCCCCCAG<br/> GGCCTGGCAG AAAGTTTCAGGAGCCCTGGAAGGAGAGGAATAAGACGG<br/> CAGGAGGAAGAGAGAGAGGGTAGAATGGAAGAATCTCACTTCAATTCTA<br/> ACCCGTACTTCTGGCCTTCTATCCCCACAGTCTCAGGTCAGATCGAGAACA<br/> CAATGTTTCATCAACAAGATGAAGGATCAGCTGTTGCCAGAGAAGGGCTGTG<br/> GTCTGGCCCCACCTCACTACCCACCTTGTGACAGTGCCTGCCTCAGTG<br/> TCCCTGCCCTCAGGCATCAGTATGGACACAGAGTCCAAGTCAGACCAGCT<br/> GACCCACACAGCCAAGCGTCCGTTACCCAGAATATCAC<br/> CTGGGCTGGAGCTTTTTGACCTTCTGAGCTTTTGGAGCAGGCGTGCCT<br/> TCTGGCCTGTGGCTTTCTGGGCAGGAACCTTCTGGGCTGGAGCCTTTTTA<br/> CTCGCGGGGTGATCTTTTTTGTGGAACCTTTAGCAGCAG CAGCAGCAGC<br/> AGCAGCAGCAGCAGCAGCAGCAGCAGCAGCAGCAGCAGCAGCAGCAGCAGCAGC<br/> CTTCCAGTCTCCTGGGGCAGCCCCCAGGGTGGGGTGGTGGGGACAGC<br/> AATCCCAACCTCCACCCAGTGTTCCTTTGACCTGACCCCGTATAAGACG<br/> GCGGAGCATATAAGGACATCTGCCTCACTGTACCACCAGCACCATCCAG<br/> GTGGAGCACCTGGCCAGCTTTAGAGATCCGTGCTGCCACCCACTGGGAA<br/> GAGGAAGAAGTAGTCC<br/> CCAGCTGCATGGAGCAGAGGTGAACGGTGGGCTCCCATCTGCATCCTCCT<br/> TCTCCTCAGCCCCCGAGCCACGTACGGCGCGCTCCTCAGCCACACGCC<br/> GCCTGTACGCGGGCCGACAGCCTCCTGGGCTCCCGAGGGACACAGCT<br/> GGCAGCTCCGGGATGCCCTCGGCAAAGCACTGGCCTCGATCTACTCCC<br/> GGATCACTCAAGCAATAACTTCTCGTCCAGCCTTCTACCCCGTGGGCTC<br/> CCCCAGGGCCTGGCAG GTAGAATGGAAGAATCTCACTTCAATTCTAAC<br/> CGTACTTCTGGCCTTCTATCCCCACAGTCTCAGGTCAGATCGAGAACACAA<br/> TGTTTCATCAACAAGATGAAGGATCAGCTGTTGCCAGAGAAGGGCTGTGGTC<br/> TGGCCCCACCTCACTACCCACCTTGTGACAGTGCCTGCCTCAGTGTCC<br/> CTGCCCTCAGGCATCAGTATGGACACAGAGTCCAAGTCAGACCAGCTGAC<br/> CCCACACAGCCAAGCGTCCGTTACCAGAATATCAGGTTGGTCCCTGTGC<br/> CGTCTACAGGACTGATGACTGTGGAGTCTCCTGTTCTCAGAGGTGGAGA<br/> AGAGAAGGGAGTCA<br/> CCTGCACCAGCAGCAGCGTATGGGCTACCAGCTGCATGGAGCAGAGGTGA<br/> ACGGTGGGCTCCCATCTGCATCCTCCTTCTCCTCAGCCCCGGAGCCACG<br/> TACGGCGGCGTCTCCAGCCACACGCCCGCTGTACGCGGGCCGACAGCC<br/> TCCTGGGCTCCCGAGGGACACAGCTGGCAGCTCCGGGGATGCCCTCGG<br/> CAAAGCACTGGCCTCGATCTACTCCCGGATCACTCAAGCAATAACTTCTC<br/> GTCCAGCCCTTCTACCCCGTGGGCTCCCGCAGGGCCTGGCA GAAAGT<br/> TCAGGAGCCCTGGAAGGAGAAGGAATAAGACGGCAGGAGGAAGAGAGA<br/> GAGAGGGTAGAATGGAAGAATCTCACTTCAATTCTAACCCGTACTTCTGGC<br/> CTTCTATCCCCACAGTCTCAGGTGAGATCGAGAACAATGTTTCATCAACAA<br/> GATGAAGGATCAGCTGTTGCCAGAGAAGGGCTGTGGTCTGGCCCCACCTC<br/> ACTACCCACCTTGTGACAGTGCCTGCCTCAGTGTCCCTGCCCTCAGGC<br/> ATCAGTATGGACACAGAGTCCAAGTCAGACCAGCTG<br/> CCACAGCTGGCAGCTCCGGGATGCCCTCGGCAAAGCACTGGCCTCGAT<br/> CTACTCCCGGATCACTCAAGCAATAACTTCTCGTCCAGCCCTTCTACCCC<br/> CGTGGGCTCCCCCAGGGCCTGG CAGGTAGAATGGAAGAATCTCACTTCA<br/> ATTCAACCGTACTTCTGGCCTTCTATCCCCACAGTCTCAGGTCAGGTAAG<br/> TGGTGTTGCTTCTTGTCTCTCCAAGTCTCAGTAGTAAGTTCTGTTACTAT<br/> GGAGACTGAAGGTACACCACATGCTGTTTTACTGGTCCCCCACCCTGA<br/> GAATTATCTAGTGTCTTCTGCCTGGGCTTCTCTA</p> |       |   |        |         |             |         |            |             |         |           |  | coding |  | utr5p  |
| #                                                                                                                                                                                                                                                                                                                                                                                                                                                                                                                                                                                                                                                                                                                                                                                                                                                                                                                                                                                                                                                                                                                                                                                                                                                                                                                                                                                                                                                                                                                                                                                                                                                                                                                                                                                                                                                                                                                                                                                                                                                                                                                                                                                                                                                                                                                                                                                                                                                                                                                                                                                                                                                                                                                                                                                                                                                                                                                                    | RPL14 | - | ZNF384 | Case-15 | NM_003200.3 | ch 3 ,  | 40,503,545 | NM_133476.4 | ch 12 , | 6,777,113 |  |        |  |        |
| <p>AGCAGCAGCAGCAGCAGCAGCAGCAGCAGCAGCAGCAGCAGCAGCAGCAGCAGC<br/> CTTCCAGTCTCCTGGGGCAGCCCCCAGGGTGGGGTGGTGGGGACAGC<br/> AATCCCAACCTCCACCCAGTGTTCCTTTGACCTGACCCCGTATAAGACG<br/> GCGGAGCATATAAGGACATCTGCCTCACTGTACCACCAGCACCATCCAG<br/> GTGGAGCACCTGGCCAGCTTTAGAGATCCGTGCTGCCACCCACTGGGAA<br/> GAGGAAGAAGTAGTCC<br/> CCAGCTGCATGGAGCAGAGGTGAACGGTGGGCTCCCATCTGCATCCTCCT<br/> TCTCCTCAGCCCCCGAGCCACGTACGGCGCGCTCCTCAGCCACACGCC<br/> GCCTGTACGCGGGCCGACAGCCTCCTGGGCTCCCGAGGGACACAGCT<br/> GGCAGCTCCGGGATGCCCTCGGCAAAGCACTGGCCTCGATCTACTCCC<br/> GGATCACTCAAGCAATAACTTCTCGTCCAGCCTTCTACCCCGTGGGCTC<br/> CCCCAGGGCCTGGCAG GTAGAATGGAAGAATCTCACTTCAATTCTAAC<br/> CGTACTTCTGGCCTTCTATCCCCACAGTCTCAGGTCAGATCGAGAACACAA<br/> TGTTTCATCAACAAGATGAAGGATCAGCTGTTGCCAGAGAAGGGCTGTGGTC<br/> TGGCCCCACCTCACTACCCACCTTGTGACAGTGCCTGCCTCAGTGTCC<br/> CTGCCCTCAGGCATCAGTATGGACACAGAGTCCAAGTCAGACCAGCTGAC<br/> CCCACACAGCCAAGCGTCCGTTACCAGAATATCAGGTTGGTCCCTGTGC<br/> CGTCTACAGGACTGATGACTGTGGAGTCTCCTGTTCTCAGAGGTGGAGA<br/> AGAGAAGGGAGTCA<br/> CCTGCACCAGCAGCAGCGTATGGGCTACCAGCTGCATGGAGCAGAGGTGA<br/> ACGGTGGGCTCCCATCTGCATCCTCCTTCTCCTCAGCCCCGGAGCCACG<br/> TACGGCGGCGTCTCCAGCCACACGCCCGCTGTACGCGGGCCGACAGCC<br/> TCCTGGGCTCCCGAGGGACACAGCTGGCAGCTCCGGGGATGCCCTCGG<br/> CAAAGCACTGGCCTCGATCTACTCCCGGATCACTCAAGCAATAACTTCTC<br/> GTCCAGCCCTTCTACCCCGTGGGCTCCCGCAGGGCCTGGCA GAAAGT<br/> TCAGGAGCCCTGGAAGGAGAAGGAATAAGACGGCAGGAGGAAGAGAGA<br/> GAGAGGGTAGAATGGAAGAATCTCACTTCAATTCTAACCCGTACTTCTGGC<br/> CTTCTATCCCCACAGTCTCAGGTGAGATCGAGAACAATGTTTCATCAACAA<br/> GATGAAGGATCAGCTGTTGCCAGAGAAGGGCTGTGGTCTGGCCCCACCTC<br/> ACTACCCACCTTGTGACAGTGCCTGCCTCAGTGTCCCTGCCCTCAGGC<br/> ATCAGTATGGACACAGAGTCCAAGTCAGACCAGCTG<br/> CCACAGCTGGCAGCTCCGGGATGCCCTCGGCAAAGCACTGGCCTCGAT<br/> CTACTCCCGGATCACTCAAGCAATAACTTCTCGTCCAGCCCTTCTACCCC<br/> CGTGGGCTCCCCCAGGGCCTGG CAGGTAGAATGGAAGAATCTCACTTCA<br/> ATTCAACCGTACTTCTGGCCTTCTATCCCCACAGTCTCAGGTCAGGTAAG<br/> TGGTGTTGCTTCTTGTCTCTCCAAGTCTCAGTAGTAAGTTCTGTTACTAT<br/> GGAGACTGAAGGTACACCACATGCTGTTTTACTGGTCCCCCACCCTGA<br/> GAATTATCTAGTGTCTTCTGCCTGGGCTTCTCTA</p>                                                                                                                                                                                                                                                                                                                                                                                                                                                                                                                                                                                                                                                                                                                                                                                                                                                 |       |   |        |         |             |         |            |             |         |           |  | coding |  | coding |
|                                                                                                                                                                                                                                                                                                                                                                                                                                                                                                                                                                                                                                                                                                                                                                                                                                                                                                                                                                                                                                                                                                                                                                                                                                                                                                                                                                                                                                                                                                                                                                                                                                                                                                                                                                                                                                                                                                                                                                                                                                                                                                                                                                                                                                                                                                                                                                                                                                                                                                                                                                                                                                                                                                                                                                                                                                                                                                                                      | TCF3  | - | ZNF384 | Case-15 | NM_003200.3 | ch 19 , | 1,620,967  | NM_133476.4 | ch 12 , | 6,788,691 |  |        |  |        |
| <p>ATGGAGCAGAGGTGAACGGTGGGCTCCCATCTGCATCCTCCTTCTCCTCA<br/> GCCCGGGAGCCACGTACGGGGCGTCTCCAGCCACACGCCGCTGTCA<br/> GCGGGGCCGACAGCCTCCTGGGCTCCCGAGGGACCACAGCTGGCAGCT<br/> CCGGGGATGCCCTCGGCAAAGCACTGGCCTCGATCTACTCCCGGATCAC<br/> TCAAGCAATAACTTCTCGTCCAGCCTTCTACCCCGTGGGCTCCCCCAG<br/> GGCCTGGCAG AAAGTTTCAGGAGCCCTGGAAGGAGAGGAATAAGACGG<br/> CAGGAGGAAGAGAGAGAGGGTAGAATGGAAGAATCTCACTTCAATTCTA<br/> ACCCGTACTTCTGGCCTTCTATCCCCACAGTCTCAGGTCAGATCGAGAACA<br/> CAATGTTTCATCAACAAGATGAAGGATCAGCTGTTGCCAGAGAAGGGCTGTG<br/> GTCTGGCCCCACCTCACTACCCACCTTGTGACAGTGCCTGCCTCAGTG<br/> TCCCTGCCCTCAGGCATCAGTATGGACACAGAGTCCAAGTCAGACCAGCT<br/> GACCCACACAGCCAAGCGTCCGTTACCCAGAATATCACGGTGGTCCCTGTGC<br/> CGTCTACAGGACTGATGACTGTGGAGTCTCCTGTTCTCAGAGGTGGAGA<br/> AGAGAAGGGAGTCA<br/> CCTGCACCAGCAGCAGCGTATGGGCTACCAGCTGCATGGAGCAGAGGTGA<br/> ACGGTGGGCTCCCATCTGCATCCTCCTTCTCCTCAGCCCCGGAGCCACG<br/> TACGGCGGCGTCTCCAGCCACACGCCCGCTGTACGCGGGCCGACAGCC<br/> TCCTGGGCTCCCGAGGGACACAGCTGGCAGCTCCGGGGATGCCCTCGG<br/> CAAAGCACTGGCCTCGATCTACTCCCGGATCACTCAAGCAATAACTTCTC<br/> GTCCAGCCCTTCTACCCCGTGGGCTCCCGCAGGGCCTGGCA GAAAGT<br/> TCAGGAGCCCTGGAAGGAGAAGGAATAAGACGGCAGGAGGAAGAGAGA<br/> GAGAGGGTAGAATGGAAGAATCTCACTTCAATTCTAACCCGTACTTCTGGC<br/> CTTCTATCCCCACAGTCTCAGGTGAGATCGAGAACAATGTTTCATCAACAA<br/> GATGAAGGATCAGCTGTTGCCAGAGAAGGGCTGTGGTCTGGCCCCACCTC<br/> ACTACCCACCTTGTGACAGTGCCTGCCTCAGTGTCCCTGCCCTCAGGC<br/> ATCAGTATGGACACAGAGTCCAAGTCAGACCAGCTG<br/> CCACAGCTGGCAGCTCCGGGATGCCCTCGGCAAAGCACTGGCCTCGAT<br/> CTACTCCCGGATCACTCAAGCAATAACTTCTCGTCCAGCCCTTCTACCCC<br/> CGTGGGCTCCCCCAGGGCCTGG CAGGTAGAATGGAAGAATCTCACTTCA<br/> ATTCAACCGTACTTCTGGCCTTCTATCCCCACAGTCTCAGGTCAGGTAAG<br/> TGGTGTTGCTTCTTGTCTCTCCAAGTCTCAGTAGTAAGTTCTGTTACTAT<br/> GGAGACTGAAGGTACACCACATGCTGTTTTACTGGTCCCCCACCCTGA<br/> GAATTATCTAGTGTCTTCTGCCTGGGCTTCTCTA</p>                                                                                                                                                                                                                                                                                                                                                                                                                                                                                                                                                                                                                                                                                                                                                                                                                                                                                                                                                                                                                                                                                                    |       |   |        |         |             |         |            |             |         |           |  | coding |  | utr5p  |
|                                                                                                                                                                                                                                                                                                                                                                                                                                                                                                                                                                                                                                                                                                                                                                                                                                                                                                                                                                                                                                                                                                                                                                                                                                                                                                                                                                                                                                                                                                                                                                                                                                                                                                                                                                                                                                                                                                                                                                                                                                                                                                                                                                                                                                                                                                                                                                                                                                                                                                                                                                                                                                                                                                                                                                                                                                                                                                                                      | TCF3  | - | ZNF384 | Case-15 | NM_003200.3 | ch 19 , | 1,620,967  | NM_133476.4 | ch 12 , | 6,788,691 |  |        |  |        |
| <p>ATGGAGCAGAGGTGAACGGTGGGCTCCCATCTGCATCCTCCTTCTCCTCA<br/> GCCCGGGAGCCACGTACGGGGCGTCTCCAGCCACACGCCGCTGTCA<br/> GCGGGGCCGACAGCCTCCTGGGCTCCCGAGGGACCACAGCTGGCAGCT<br/> CCGGGGATGCCCTCGGCAAAGCACTGGCCTCGATCTACTCCCGGATCAC<br/> TCAAGCAATAACTTCTCGTCCAGCCTTCTACCCCGTGGGCTCCCCCAG<br/> GGCCTGGCAG AAAGTTTCAGGAGCCCTGGAAGGAGAGGAATAAGACGG<br/> CAGGAGGAAGAGAGAGAGGGTAGAATGGAAGAATCTCACTTCAATTCTA<br/> ACCCGTACTTCTGGCCTTCTATCCCCACAGTCTCAGGTCAGATCGAGAACA<br/> CAATGTTTCATCAACAAGATGAAGGATCAGCTGTTGCCAGAGAAGGGCTGTG<br/> GTCTGGCCCCACCTCACTACCCACCTTGTGACAGTGCCTGCCTCAGTG<br/> TCCCTGCCCTCAGGCATCAGTATGGACACAGAGTCCAAGTCAGACCAGCT<br/> GACCCACACAGCCAAGCGTCCGTTACCAGAATATCACGGTGGTCCCTGTGC<br/> CGTCTACAGGACTGATGACTGTGGAGTCTCCTGTTCTCAGAGGTGGAGA<br/> AGAGAAGGGAGTCA<br/> CCTGCACCAGCAGCAGCGTATGGGCTACCAGCTGCATGGAGCAGAGGTGA<br/> ACGGTGGGCTCCCATCTGCATCCTCCTTCTCCTCAGCCCCGGAGCCACG<br/> TACGGCGGCGTCTCCAGCCACACGCCCGCTGTACGCGGGCCGACAGCC<br/> TCCTGGGCTCCCGAGGGACACAGCTGGCAGCTCCGGGGATGCCCTCGG<br/> CAAAGCACTGGCCTCGATCTACTCCCGGATCACTCAAGCAATAACTTCTC<br/> GTCCAGCCCTTCTACCCCGTGGGCTCCCGCAGGGCCTGGCA GAAAGT<br/> TCAGGAGCCCTGGAAGGAGAAGGAATAAGACGGCAGGAGGAAGAGAGA<br/> GAGAGGGTAGAATGGAAGAATCTCACTTCAATTCTAACCCGTACTTCTGGC<br/> CTTCTATCCCCACAGTCTCAGGTGAGATCGAGAACAATGTTTCATCAACAA<br/> GATGAAGGATCAGCTGTTGCCAGAGAAGGGCTGTGGTCTGGCCCCACCTC<br/> ACTACCCACCTTGTGACAGTGCCTGCCTCAGTGTCCCTGCCCTCAGGC<br/> ATCAGTATGGACACAGAGTCCAAGTCAGACCAGCTG<br/> CCACAGCTGGCAGCTCCGGGATGCCCTCGGCAAAGCACTGGCCTCGAT<br/> CTACTCCCGGATCACTCAAGCAATAACTTCTCGTCCAGCCCTTCTACCCC<br/> CGTGGGCTCCCCCAGGGCCTGG CAGGTAGAATGGAAGAATCTCACTTCA<br/> ATTCAACCGTACTTCTGGCCTTCTATCCCCACAGTCTCAGGTCAGGTAAG<br/> TGGTGTTGCTTCTTGTCTCTCCAAGTCTCAGTAGTAAGTTCTGTTACTAT<br/> GGAGACTGAAGGTACACCACATGCTGTTTTACTGGTCCCCCACCCTGA<br/> GAATTATCTAGTGTCTTCTGCCTGGGCTTCTCTA</p>                                                                                                                                                                                                                                                                                                                                                                                                                                                                                                                                                                                                                                                                                                                                                                                                                                                                                                                                                                                                                                                                                                     |       |   |        |         |             |         |            |             |         |           |  | coding |  | intron |

|               |                 |                    |             |         |            |             |         |            |  |        |        |
|---------------|-----------------|--------------------|-------------|---------|------------|-------------|---------|------------|--|--------|--------|
| <i>TCF3</i>   | - <i>ZNF384</i> | Case-15            | NM_003200.3 | ch 19 , | 1,620,967  | NM_133476.4 | ch 12 , | 6,797,392  |  |        |        |
|               |                 |                    |             |         |            |             |         |            |  | coding | utr5p  |
| <i>ZNF384</i> | - <i>TAF15</i>  | Case-17            | NM_133476.4 | ch 12 , | 6,797,333  | NM_139215.2 | ch 17 , | 34,161,570 |  |        |        |
|               |                 |                    |             |         |            |             |         |            |  | utr5p  | coding |
| <i>TAF15</i>  | - <i>ZNF384</i> | Case-17            | NM_139215.2 | ch 17 , | 34,161,570 | NM_133476.4 | ch 12 , | 6,797,333  |  |        |        |
|               |                 |                    |             |         |            |             |         |            |  | coding | intron |
| <i>ZNF384</i> | - <i>TAF15</i>  | Case-17            | NM_133476.4 | ch 12 , | 6,797,333  | NM_139215.2 | ch 17 , | 34,161,570 |  |        |        |
|               |                 |                    |             |         |            |             |         |            |  | utr5p  | coding |
| <i>ZNF384</i> | - <i>TAF15</i>  | Case-17 (relapse-1 | NM_133476.4 | ch 12 , | 6,797,333  | NM_139215.2 | ch 17 , | 34,161,570 |  |        |        |
|               |                 |                    |             |         |            |             |         |            |  | utr5p  | coding |
| <i>ZNF384</i> | - <i>TAF15</i>  | Case-17 (relapse-1 | NM_133476.4 | ch 12 , | 6,797,333  | NM_139215.2 | ch 17 , | 34,161,570 |  |        |        |
|               |                 |                    |             |         |            |             |         |            |  | utr5p  | coding |

GGGCCAGGCGGGCTTCGGGCCATGCTGGGTGGGGCTCATCCCCGCTG  
CCCCTCCCGCCGGTAGCGGCCGGTGGGCAGCAGTGAAGCAGCAGC  
ACGTTTGGTGGCCTGCACCAGCACGAGCGTATGGGTACAGCTGCATGG  
AGCAGAGGTGAACGGTGGGCTCCCATCTGCATCCTCTTCTCCTCAGCCC  
CCGGAGCCACGTACGGCGCGTCTCCAGCCACACGCCCTGTGAGCGG  
GGCCGACAGCCTCCTGGGCTCCCGAGGGACCACAGCTGGCAGCTCCGG  
GGATGCCCTCGGCAAAGCACTGCCTCGATCTACTCCCCGATCACTCAA  
GCAATAACTTCTCGTCCAGCCCTTCTACCCCGTGGGCTCCCCCAGGGC  
CTGGCA|GAAAGTTTCAGGAGCCCTGGAAGGAGAAAGGAATAAGACGGCAG  
GAGGAAGAGAGAGAGAGGGTAGAATGAAGAATCTCACTTCAATTCTAAC  
CGTACTTCTGGCCTTCTATCCCCACAGTCTCAGGTCAGGTAAGTGGTGTG  
CTTTCTTGTCTCTCCAAGTCTCAGTAGTAAGTTCTGTACTATGGAGACTG  
AAGGTACACCACATGCTGTTTACTGGGTCCCCACCCCTGAGAATTATCTA  
GTGTTTC  
CTTTTTCCCCTCCCTCGCCCCTTCTGGTCCCTCCACCCTCCTCGGCTCCC  
TCTTTTCCCAGCAAACGCCGCCCTCCCGCGCCTGGCTCAGGCTCTGG  
CGCCGCCGACGCGCTCCGCCGCCGAAAGTTTCAGGAGCCCTGGAAGGAG  
AAGGAATAAGACGGCAGGAGGAAGAGAGAGAGGGGT|CACAGGGATTAT  
GGACCCAGAACAGATGCTGATTCAGAATCTGATAATCAGATAACAACAAA  
TCTTTGTGCAAGGACTTGGGGAGGGTGTGTCTACAGATCAAGTTGGGGAG  
TTCTTTAAACAAATAGGAATTATCAAGACAATAAGAACCCGAAAACCAAT  
GATAAATCTTTATACAGACAAGGACACAGGAAAGCCAAAGGGGGAGGCAAC  
AGTGTCA  
TTTATCATTGGTTTTCCGGTCTTCTATTGTCTTGATAATCCTATTGTTTAA  
AGAACTCCCAACTTGATCTGTAGACACACCCTCCCAAGTCTTGACAAA  
AGATTGTGTTGTTATCTGAATATCAGATTCTGAATCAGCATCTGTTCTGGGT  
CCATAATCCCTGTG|ACCCTCTCTCTCTCTCTCTCTCTGCGCTTATTCTTCT  
TCCTTTCCAGGGCTCCTGAACCTTCTGTAACAAATGTCTAGGTTACAGGG  
GCCAGGCAGGGTGCAGCCACCAGAGAATCTGTGGAGAACCTCAGGAATTAT  
TTGTACAGCAGTCAGTCTGGAAGGCAGGCAGACCCCCAGCCAGCAATCCA  
AAGACGGGTGGATATAATAACAGCAGTCTAGTGTACCCTCTACGTGGATAC  
AAGAGA  
CCCCTACATTGCTATTTCCCTCCCTCCCCCTTTTTCGTTTCCGGCGCTCCC  
GCCTTCTCTCCGACAGCTCTTCTCTGAGCCTGTTGGGGGAGGGAGGG  
GGCGGTGGAGAACTGGGGTTCGCGGGAGCAGCTGCAGCACCCTT  
CCGAAAAGTTTCAGGAGCCCTGGAAGGAGAAAGGAATAAGACGGCAGGAG  
GAAGAGAGAGAGAGGGT|CACAGGGATTATGGACCCAGAACAGATGCTGAT  
TCAGAATCTGATAATCAGATAACAACAATCTTTGTGCAAGGACTTGGGG  
AGGGTGTGTCTACAGATCAAGTTGGGGAGTTCTTTAAACAAATAGGAATTAT  
CAAGACAATAAGAACCCGAAAACCAATGATAAATCTTTATACAGACAAG  
GACACAGGAAAGCCAAAGGGGGAGGCAACAGTGTCAATTTGATGACCCTCC  
TTCAGCTAAGGCAGCCATTGACTGGTT  
GCCTGTGAGTGTGTGGGTCTGTCTCGTCCAGAAAGTGCCTGCCCGCGCG  
CTGCGCCTTGGCCTTTTTCCCTCCCTCGCCCCTTCTGGTCTCCTCCACC  
CTCCTCGGCTCCCTCCTTTCCAGCAAACGCCGCCCTCCCGGCCCTGG  
CTCAGGCTCTGGCGCCGCCAGCCGTCGCGCCCGAAAAGTTTCAGGAGCC  
CCTGGAAGGAGAAAGGAATAAGACGGCAGGAGGAAGAGAGAGAGGGT|  
CACAGGGATTATGGACCCAGAACAGATGCTGATTGAGAATCTGATAATTCAG  
ATAACAACAATCTTTGTGCAAGGACTTGGGGAGGGTGTGTCTACAGATC  
AAGTTGGGGAGTTCTTTAAACAAATAGGAATTATCAAGACAATAAGAAC  
CGGAAAACCAATGATAAATCTTTATACAGACAAGGACACAGGAAAGCCAAA  
GGGGGAGGCAACAGTGTCAATTTGATGACCCCTCTTCAAGTAAGGCAGCCA  
TTGACTGGTTTGTGGAAGAAATTCATGGCAACAT  
CCTTTTCGTTCCGGCGCTCCCGCCTTCTCTCCGACAGCTCTTCTCTGAG  
CCTGTTGGGGGAGGGAGGGGGGGCTGGAGGAATGGGGTTCGCGGGGA  
GCACGAGCTGCAGCACCACTTCCGAAAAGTTTCAGGAGCCCTGGAAGGA  
GAAGGAATAAGACGGCAGGAGGAAGAGAGAGAGGGT|CACAGGGATTAT  
TGGACCCAGAACAGATGCTGATTGAGAATCTGATAATCAGATAACAACACA  
ATCTTTGTGCAAGGACTTGGGGAGGGTGTGTCTACAGATCAAGTTGGGGGA  
GTTCTTTAAACAAATAGGAATTATCAAGACAATAAGAACCCGAAAACCA  
ATGATAAATCTTTATAC



|         |   |        |                     |             |         |            |             |         |            |        |  |        |
|---------|---|--------|---------------------|-------------|---------|------------|-------------|---------|------------|--------|--|--------|
| ZNF384  | - | TAF15  | Case-17 (relapse-1) | NM_133476.4 | ch 12 , | 6,797,333  | NM_139215.2 | ch 17 , | 34,161,570 | utr5p  |  | coding |
| TAF15   | - | ZNF384 | Case-17 (relapse-1) | NM_139215.2 | ch 17 , | 34,149,837 | NM_133476.4 | ch 12 , | 6,788,691  | coding |  | utr5p  |
| 2 TAF15 | - | ZNF384 | Case-18             | NM_139215.2 | ch 17 , | 34,149,837 | NM_133476.4 | ch 12 , | 6,788,691  | coding |  | utr5p  |
| ZNF384  | - | TAF15  | Case-18             | NM_133476.4 | ch 12 , | 6,797,333  | NM_139215.2 | ch 17 , | 34,151,082 | utr5p  |  | coding |
| TAF15   | - | ZNF384 | Case-18             | NM_139215.2 | ch 17 , | 34,149,837 | NM_133476.4 | ch 12 , | 6,788,691  | coding |  | utr5p  |
| ZNF384  | - | TAF15  | Case-18             | NM_133476.4 | ch 12 , | 6,797,333  | NM_139215.2 | ch 17 , | 34,151,082 | utr5p  |  | coding |

GAAGTGCCTGCCCGCGCTGCGCCTTGGCCTTTTCCCCTCCCTCGCCC  
 CTTCTGGTCTCCCACCCTCCTCGGCTCCCTCCTTTCCAGCAAACGCC  
 GCCCTCCCGCGCCCTGGCTCAGGCTCTGGCCGCGCCGCGCAGCCGTGCG  
 CGCCCGAAAGTTTCAGGAGCCCTGGAAAGGAGAAGGAATAAGACGGCAGG  
 AGGAAGAGAGAGAGAGGGT|CACAGGGATTATGGACCCAGAACAGATGCT  
 GATTGAGAATCTGATAATTAGATAAACACAATCTTTGTGCAAGGACTTG  
 GGGAGGGTGTGCTACAGATCAAGTTGGGGAGTTCTTTAAACAAATAGGAA  
 TTATCAAGACAAT  
 CCAAGGTGGAAGAGCACCTTCTATGACCAGCCAGACTATGGTCAACAAGA  
 TTCATATGACCAGCAGTCAGGCTATGATCAACATCAAGGCTCATATGATGAG  
 CAGTCAAATTATGATCAGCAGCATGATTCTATAGTCAAAAACCAGCAGTCTTA  
 TCATTCAAAAGGGAAAACACAGCCACCACACAAG|GTAGAATGGAAGA  
 ATCTCATTCAATTCTAACCCGTACTTCTGGCCTTCTATCCCACAGTCTCA  
 GGTGAGATCGAGAACACAATGTTATCAACAAGATGAAGGATCAGCTGTTG  
 CCAGAGAAGGGCTGTGGTCTGGCCCCACCTCACTACCCACCTTGTGAC  
 AGTGCCTGCCTCAGTGCCTGCCCTCAGGCATCAGTATGGACACAGAT  
 CCA  
 CAAAAGCAGAGCTCATATAGCCAGCAACCATATAATAACCAGGGACAGCAG  
 CAAAACATGGAATCATCAGGAAGCCAAAGGTGGAAGAGCACCTTCTATGAC  
 CAGCCAGACTATGGTCAACAAGATT|CATATGACCAGCAGTCAAGGCTATGATC  
 AACATCAAGGCTCATATGATGAGCAGTCAAATTATGATCAGCAGCATGATC  
 CTATAGTCAAAAACCAGCAGTCTATCATTACAAAAGGGAAAACACAGCCAC  
 CACACACAAG|GTAGAATGGAAGAACTCACTTCAATTCTAACCCGTACTTCT  
 GGCTTCTATCCCACAGTCTCAGTCAAGTCAAGTCAAGTCAAGTCAAGTCAAGT  
 ACAAGATGAAGGATCAGCTGTTGCCAGAGAAGGGCTGTGGTCTGGCCCCA  
 CCTCACTACCCACCTTGTGACAGTGCCTGCCTCAGTGTCCCTGCCCTC  
 AGGCATCAGTATGGACACAGAGTCCAAGTCAAGCAGCTGACCCACACA  
 GCCAAGCGTCCGTTACCCAGAATATCACGGTGGTCCCTGT  
 CCCGCTTCTCTCCGACAGCTCTTCTCTGAGCCTGTTGGGGGGAGGGA  
 GGGGGGCGTGGAGAACTGGGTTTCGCGGAGCAGCAGCTGCAGCAC  
 ACTTCCGAAAGTT|CAGGAGCCCTGGAAAGGAGAAGGAATAAGACGGCAG  
 GAGGAAGAGAGAGAGAG|GATGACCCTCGTGTGATGAGTAGGTATGGAGAA  
 GATAATAGAGGATATGGCGGTCACAGGGAGGAGGTAGAGGGCGTGGGG  
 GATATGACAAGGATGGAAGAGTCTATGACAGGATCAAGTGGTGGTGACC  
 GCGGTGGCTTCAAAAATTTGGTGGTCAACAGGATTATGGACCCAGAACAG  
 ATGCTGATTCAGAATCTGATAATTAGATAAACACAATCTTTGTGCAAGGA  
 CTTGGGGAGGGTGTGCTACAGATCAAGTTGGGGAGTTCTTTAAACAAATA  
 GGAATTATCAAGACAATAAGAAAGCCGGA AAAACCAATGATAAATCTTTATAC  
 AGACAAGGACACAGGAAAAGCCAAAGGG  
 GCAAAACATGGAATCATCAGGAAGCCAAGGTGGAAGAGCACCTTCTATGAT  
 CCAGCCAGACTATGGTCAACAAGATT|CATATGACCAGCAGTCAAGGCTATGAT  
 CAACATCAAGGCTCATATGATGAGCAGTCAAATTATGATCAGCAGCATGATT  
 CCTATAGTCAAAAACCAGCAGTCTTATCATTCAAAAAGGGAAAACACAGCCA  
 CCACACACAAG|GTAGAATGGAAGAATCTCACTTCAATTCTAACCCGTACTTCT  
 TGGCTTCTATCCCACAGTCTCAGGTCAGGTAAGTGGTGGTGGTCTTTCTTG  
 CTCTCTCCAAGTCTCAGTAGTAAGTTCTGTTACTATGGAGACTGAAGGTACA  
 CCATGCTGTTTTACTGGGTCCCCACCCCTGAGAATTATCTAGTGTCTTCT  
 GCCTGGGCTTCTCTCTAGAAGGCCAGAGGTATGAAGTGC  
 CTTCTGGTCTCCCACCCTCCTCGGCTCCCTCCTTTCCAGCAAACGCC  
 GCCCTCCCGCGCCCTGGCTCAGGCTCTGGCCCGCCGCGCAGCCGTGCG  
 CGCCCGAAAGTT|CAGGAGCCCTGGAAAGGAGAAGGAATAAGACGGCAGG  
 AGGAAGAGAGAGAGAG|GATGACCCTCGTGTGATGAGTAGGTATGGAGAA  
 ATAAAGAGGATATGGCGGTCACAGGGAGGAGGTAGAGGGCGTGGGGGA  
 TATGACAAGGATGGAAGAGTCTATGACAGGATCAAGTGGTGGTGACCC  
 CGGTGGCTTCAAAAATTTGGTGGTCAACAGGATTATGGACCCAGAACAGA  
 TGCTGATTCAGAATCTGATAATTAGATAAACACAATCTTTGTGCAAGGA  
 CTTGGGGAGGGTGTGCTACAGATCAAGTTGGGGAGTTCTTTAAACAAATA  
 GGAATTATCAAGACAATAAGAA





|               |                 |         |             |         |            |             |         |           |                                                                                                                                                                                                                                                                                                                                                                                                                                                                                                                                                                                                                                                                                                                                                                                                                                                                                                                                                                                                                                                                                                                                                                                                                                                                                                                                                                                                                                                                         |        |        |
|---------------|-----------------|---------|-------------|---------|------------|-------------|---------|-----------|-------------------------------------------------------------------------------------------------------------------------------------------------------------------------------------------------------------------------------------------------------------------------------------------------------------------------------------------------------------------------------------------------------------------------------------------------------------------------------------------------------------------------------------------------------------------------------------------------------------------------------------------------------------------------------------------------------------------------------------------------------------------------------------------------------------------------------------------------------------------------------------------------------------------------------------------------------------------------------------------------------------------------------------------------------------------------------------------------------------------------------------------------------------------------------------------------------------------------------------------------------------------------------------------------------------------------------------------------------------------------------------------------------------------------------------------------------------------------|--------|--------|
| <i>ZNF384</i> | - <i>CREBBP</i> | Case-20 | NM_133476.4 | ch 12 , | 6,797,333  | NM_004380.2 | ch 16 , | 3,831,307 | <p>ATTCGTCTTAGTTTCTGGGAATTGGATTATTTCTCTTGATCCACGTAGAGG<br/> GTAGCACTAGACTGCTGTTATTATATCCACCCGTCTTTGGATTGCTGGCTGG<br/> GGGGTCTGCCTGCCTTCCAGACTGACTGCTGACAAATAATTCTGAGGTTT<br/> TCCACAGTTCTCTGGTGGCTGCACCCCTGCCTGGCCCTGTAACCTAGACAA<br/> TTTGTTTACAGAAAGTTTCAGGAGCCCTGAAAGGAGAAGGAATAAGACGGC<br/> AGGAGGAAGAGAGAGAGAGGG AAATAATCCAATGAACATCCAGCAGGAG<br/> GAATAACAACAGATCAGCAGCCCCAAACTTGATTTAGAATCAGCTCTTCC<br/> GACTTCCCTGGGGCCACAACCCTGATGAACGATGGCTCCAACCTCTG<br/> GTAACATTGGAAACCCTCAGCACTATACCAACAGCAGCTCCTCTTAGCA<br/> CCGGTGTAAAGGAAAGGCTGGCACGAACATGCACTCAGGACCTGCGGAGC<br/> CATCTAGTGCATAAACTCGTCCAAGCCATTTCCCAACACCTGATCCCGCA<br/> GCTCTAAAGGATCGCCGCATGGAAAACCTGG<br/> CAACATCAGCCGTCTCAACAACAGGCATCACCTGAATATCTTACCTCCCCTC<br/> AAGAGTTCTCACACGCCTTAGTTTCTACACTTCATCACTTCCAGCTCAGGT<br/> TGGAAACATAATGGACTCCTCTATAGTGCCAATAGGTGAGTTGCTGATAAA<br/> GAGGCCATTGCAAAATTCACAAATCAGAAGAACATCAGCAATCCACCTGATA<br/> TGTGAGGGTGGAAATCCTTTTGGAGAGGATAATTTCTCTAAGTTAACAGAAGA<br/> GGAATATTGGACAGAGAATTTGACCTTCTAAGATCAATAGGCTCGAGGA<br/> GAGAGCATCCTCAGATAAGAATGTAGACTCACTTTCTGCTCCACATAACCAT<br/> CCTCCAGAAGATCCTTTTGGTTCTGTTCTTTCATTTCTCATTGAGGT AGAA<br/> TGGAAAGATCTCACTTCAATTCTAACCCGTACTTCTGGCCTTCTATCCCCAC<br/> AGTCTCAGGTCAGATCGAGAACACAATGTTTCATCAACAAGATGAAGGATCA<br/> GCTGTTGCCAGAGAAGGGCTGTGGTCTGGCCCCACCTCACTACCCACCT<br/> TGCTGACAGTGCCTGCCTCAGTGCCTGCCCTCAGGCATCAGTATGGAC<br/> ACAGAGTCCAAGTCAAGACCAGCTGACCCACACAGCCAAGCGTCCGTTAC<br/> CCAGAATATCACG</p> | utr5p  | coding |
| <i>BMP2K</i>  | - <i>ZNF384</i> | Case-22 | NM_198892.1 | ch 4 ,  | 79,808,438 | NM_133476.4 | ch 12 , | 6,788,691 | <p>ATTCGTCTTAGTTTCTGGGAATTGGATTATTTCTCTTGATCCACGTAGAGG<br/> GTAGCACTAGACTGCTGTTATTATATCCACCCGTCTTTGGATTGCTGGCTGG<br/> GGGGTCTGCCTGCCTTCCAGACTGACTGCTGACAAATAATTCTGAGGTTT<br/> TCCACAGTTCTCTGGTGGCTGCACCCCTGCCTGGCCCTGTAACCTAGACAA<br/> TTTGTTTACAGAAAGTTTCAGGAGCCCTGAAAGGAGAAGGAATAAGACGGC<br/> AGGAGGAAGAGAGAGAGAGGG AAATAATCCAATGAACATCCAGCAGGAG<br/> GAATAACAACAGATCAGCAGCCCCAAACTTGATTTAGAATCAGCTCTTCC<br/> GACTTCCCTGGGGCCACAACCCTGATGAACGATGGCTCCAACCTCTG<br/> GTAACATTGGAAACCCTCAGCACTATACCAACAGCAGCTCCTCTTAGCA<br/> CCGGTGTAAAGGAAAGGCTGGCACGAACATGCACTCAGGACCTGCGGAGC<br/> CATCTAGTGCATAAACTCGTCCAAGCCATTTCCCAACACCTGATCCCGCA<br/> GCTCTAAAGGATCGCCGCATGGAAAACCTGG<br/> CAACATCAGCCGTCTCAACAACAGGCATCACCTGAATATCTTACCTCCCCTC<br/> AAGAGTTCTCACACGCCTTAGTTTCTACACTTCATCACTTCCAGCTCAGGT<br/> TGGAAACATAATGGACTCCTCTATAGTGCCAATAGGTGAGTTGCTGATAAA<br/> GAGGCCATTGCAAAATTCACAAATCAGAAGAACATCAGCAATCCACCTGATA<br/> TGTGAGGGTGGAAATCCTTTTGGAGAGGATAATTTCTCTAAGTTAACAGAAGA<br/> GGAATATTGGACAGAGAATTTGACCTTCTAAGATCAATAGGCTCGAGGA<br/> GAGAGCATCCTCAGATAAGAATGTAGACTCACTTTCTGCTCCACATAACCAT<br/> CCTCCAGAAGATCCTTTTGGTTCTGTTCTTTCATTTCTCATTGAGGT AGAA<br/> TGGAAAGATCTCACTTCAATTCTAACCCGTACTTCTGGCCTTCTATCCCCAC<br/> AGTCTCAGGTCAGATCGAGAACACAATGTTTCATCAACAAGATGAAGGATCA<br/> GCTGTTGCCAGAGAAGGGCTGTGGTCTGGCCCCACCTCACTACCCACCT<br/> TGCTGACAGTGCCTGCCTCAGTGCCTGCCCTCAGGCATCAGTATGGAC<br/> ACAGAGTCCAAGTCAAGACCAGCTGACCCACACAGCCAAGCGTCCGTTAC<br/> CCAGAATATCACG</p> | coding | utr5p  |

**Supplementary Table 4.** Clinical characteristics of patients with *EP300-ZNF384* fusion gene identified in this study.

| <b>Patient</b> | <b>Fusion partner</b> | <b>Age</b> | <b>Gender</b> | <b>Initial WBC</b> | <b>Karyotype</b> | <b>Initial risk</b> | <b>Day 8 blasts</b> | <b>CNS involvement</b> | <b>Current status</b> | <b>Relapse (date, site)</b> | <b>FUP (years)</b> |
|----------------|-----------------------|------------|---------------|--------------------|------------------|---------------------|---------------------|------------------------|-----------------------|-----------------------------|--------------------|
| Case-23        | <i>EP300</i>          | 11         | M             | 59400              | 46,XY            | HEX                 | 32                  | CNS1                   | 1st CR                | NA                          | 7.6                |
| Case-24        | <i>EP300</i>          | 3          | F             | 19600              | 46,XX            | SR                  | 0                   | CNS1                   | 1st CR                | NA                          | 6.5                |
| Case-25        | <i>EP300</i>          | 12         | M             | 161610             | 46,XY            | HEX                 | 1216                | CNS1                   | 1st CR                | NA                          | 5.1                |





| ID                  | ZNF384-WT-59   | ZNF384-WT-60   | ZNF384-WT-61   | ZNF384-WT-62   | ZNF384-WT-63   | ZNF384-WT-64   | ZNF384-WT-65   | ZNF384-WT-66   | ZNF384-WT-67   | ZNF384-WT-68   | ZNF384-WT-69   | ZNF384-WT-70   | ZNF384-WT-71   | ZNF384-WT-72   | ZNF384-WT-73   | ZNF384-WT-74   |
|---------------------|----------------|----------------|----------------|----------------|----------------|----------------|----------------|----------------|----------------|----------------|----------------|----------------|----------------|----------------|----------------|----------------|
| Fusion gene         | Not identified |
| Immunophenotype     |                |                |                |                |                |                |                |                |                |                |                |                |                |                |                |                |
| cyt-CD79a           | NT             | 93.40          | 84.70          | 98.90          | 60.90          | 71.40          | 89.60          | 84.20          | 0.00           | 87.50          | 95.40          | 75.40          | 96.20          | 81.60          | 97.70          | 75.80          |
| HLA-DR              |                | 63.00          | 55.00          | 85.90          | 99.10          | 84.50          | 73.00          | 76.40          | 64.20          | 70.10          | 85.20          | 73.90          | 47.60          | 46.50          | 56.80          | 91.70          |
| CD19                |                | 51.50          | 35.20          | 87.70          | 98.50          | 79.20          | 84.90          | 87.50          | 88.00          | 81.10          | 79.10          | 61.70          | 39.10          | 92.80          | 87.10          | 96.60          |
| CD20                |                | 9.70           | 1.60           | 6.44           | 0.46           | 1.38           | 2.69           | 2.80           | 5.43           | 10.60          | 1.10           | 9.30           | 7.60           | 5.20           | 2.30           | 25.90          |
| CD22                |                | 29.50          | 80.00          | 73.80          | 91.70          | 47.60          | 79.40          | 83.70          | 79.40          | 41.70          | 42.20          | 80.00          | 85.60          | 43.10          | 66.60          | 77.60          |
| cyt-IgM             | NT             |                | 83.10          | 3.03           | 1.02           | 8.65           | 70.40          | 5.10           | NT             | NT             | 0.90           | 2.20           | NT             | 0.50           | 1.20           | 8.50           |
| Igk                 |                | 5.30           | 1.00           | 5.19           | 1.32           | 1.45           | 0.91           | 0.90           | 4.62           | 2.50           | 0.10           | 6.80           | 0.40           | 0.20           | 0.30           | 0.40           |
| IgA                 |                | 1.20           | 0.10           | 1.92           | 0.28           | 0.35           | 0.01           | 0.13           | 0.93           | 1.50           | 0.20           | 1.80           | 0.10           | 0.10           | 0.50           | 0.10           |
| IgH                 |                | 11.20          | 2.40           | 2.98           | 0.20           | 2.99           | 0.68           | 0.60           | 3.89           | 5.20           | 0.40           | 7.50           | 0.90           | 4.40           | 0.70           | 1.50           |
| CD24                |                | 55.80          | 88.20          | 87.90          | 88.90          | 81.20          | 84.20          | 79.40          | 92.20          | 82.20          | 97.60          | 91.20          | 85.10          | 88.10          | 98.50          | 96.70          |
| CD10                |                | 53.00          | 86.00          | 86.40          | 82.70          | 81.30          | 90.40          | 90.90          | 93.10          | 84.80          | 98.00          | 91.60          | 83.40          | 93.10          | 93.30          | 3.20           |
| 7 (iNG-2)           |                | 1.00           | 0.10           | 0.04           | 2.72           | 0.09           | 1.04           | 0.10           | 0.06           | 0.20           | 0.20           | 0.10           | 0.10           | 2.30           | 0.30           | 0.10           |
| CD34                |                | 2.10           | 11.90          | 78.20          | 97.20          | 6.90           | 80.10          | 80.50          | 45.00          | 69.30          | 50.30          | 41.60          | 0.10           | 82.80          | 1.30           | 95.50          |
| cyt-TdT             | NT             |                | 50.50          | 88.80          | 98.80          | 81.90          | 79.80          | 86.60          | 42.50          | 75.40          | 90.20          | 94.20          | 83.90          | 90.20          | 91.90          | 98.90          |
| CD99                |                | 2.40           | 21.40          | 84.20          | 5.35           | 35.10          | 86.60          | 78.40          | 69.00          | 13.90          | 43.40          | 37.40          | 86.00          | 29.00          | 18.10          | 3.20           |
| cyt-MPO             | NT             |                | 0.70           | 5.10           | 0.20           | 1.45           | 0.90           | 0.10           | 0.94           | 0.00           | 0.10           | 0.10           | 0.90           | 0.20           | 1.50           | 0.10           |
| CD85                |                | 8.60           | 4.80           | 2.06           | 0.03           | 0.80           | 1.86           | 2.30           | 0.55           | 0.40           | 0.20           | 0.90           | 0.10           | 1.50           | 2.80           | 0.10           |
| CD15                |                | 5.20           | 3.40           | 1.10           | 0.03           | 0.17           | 1.12           | 0.60           | 0.25           | 0.20           | 0.30           | 10.30          | 0.40           | 0.50           | 0.10           | 0.20           |
| CD13                |                | 2.80           | 1.40           | 1.45           | 49.80          | 0.43           | 1.75           | 3.60           | 0.34           | 0.20           | 7.50           | 1.30           | 0.10           | 0.20           | 0.50           | 0.10           |
| CD33                |                | 3.50           | 0.70           | 6.95           | 1.32           | 0.52           | 3.79           | 78.30          | 2.13           | 0.30           | 5.10           | 0.90           | 48.20          | 0.10           | 0.40           | 0.10           |
| CD117               |                | 0.60           | 0.10           | 0.09           | 0.42           | 0.09           | 0.12           | 0.10           | 0.28           | NT             | 0.00           | 0.60           | 0.10           | 0.30           | 0.10           | 0.00           |
| CD14                |                | 1.40           | 0.30           | 0.46           | 0.02           | 0.02           | 1.66           | 0.10           | 0.44           | NT             | 0.20           | 0.10           | 0.20           | 0.70           | 0.00           | 0.10           |
| CD64                |                | 2.10           | 0.30           | 1.72           | 0.02           | 1.60           | 3.02           | 0.30           | 0.30           | 0.64           | NT             | 0.30           | 0.50           | 0.10           | 1.10           | 0.40           |
| CD11b               |                | 8.00           | 13.00          | 4.64           | 12.60          | 7.57           | 4.22           | 2.80           | 13.61          | NT             | 3.70           | 2.60           | 27.70          | 1.90           | 0.70           | 0.10           |
| CD66c               |                | 30.40          | 8.10           | 73.80          | 56.00          | 74.90          | 0.53           | 85.00          | 43.40          | 76.20          | 0.10           | 22.50          | 28.60          | 96.10          | 0.10           | 0.10           |
| cyt-CD3             | NT             |                | 6.20           | 2.11           | 2.13           | 12.60          | 5.21           | 3.80           | 2.55           | 0.00           | 2.10           | 2.90           | 9.30           | 2.70           | 1.70           | 0.80           |
| CD7                 |                | 18.20          | 7.20           | 11.20          | 1.18           | 16.80          | 5.45           | 5.30           | 4.96           | 12.70          | 2.80           | 6.70           | 14.20          | 4.20           | 1.70           | 1.00           |
| CD2                 |                | 12.50          | 2.00           | 5.02           | 33.10          | 16.60          | 4.78           | 3.70           | 4.23           | 11.90          | 0.70           | 3.30           | 11.90          | 4.10           | 1.30           | 1.10           |
| CD5                 |                | 16.00          | 6.80           | 5.98           | 0.76           | 13.60          | 3.99           | 4.40           | 4.01           | 7.40           | 1.10           | 6.30           | 11.90          | 3.90           | 1.30           | 0.60           |
| CD1a                |                | 0.00           | 0.10           | 0.04           | 0.01           | 0.14           | 0.00           | 0.10           | 0.07           | NT             | 0.10           | 0.10           | 0.10           | 0.30           | 0.10           | 0.10           |
| CD8                 |                | 9.30           | 3.30           | 5.56           | 0.60           | 8.60           | 2.34           | 4.40           | 1.98           | 3.80           | 0.90           | 2.30           | 6.10           | 2.40           | 1.20           | 0.30           |
| CD4                 |                | 12.20          | 4.80           | 2.60           | 1.09           | 4.91           | 4.30           | 3.10           | 1.90           | 9.20           | 4.20           | 4.20           | 6.40           | 2.70           | 2.10           | 0.10           |
| CD3                 |                | 16.00          | 6.40           | 6.45           | 0.62           | 14.20          | 4.72           | 3.90           | 4.83           | 13.20          | 1.20           | 6.30           | 12.90          | 4.20           | 1.20           | 0.30           |
| TCR- $\alpha\beta$  |                | 17.40          | 6.70           | 5.87           | 1.10           | 14.00          | 4.55           | 3.90           | 9.01           | NT             | 2.10           | 10.30          | 11.70          | 6.80           | 1.10           | 0.40           |
| TCR- $\gamma\delta$ |                | 1.60           | 0.90           | 0.59           | 0.02           | 1.10           | 0.11           | 0.60           | 0.55           | NT             | 0.30           | 0.40           | 0.80           | 0.30           | 0.10           | 0.10           |
| CD56                |                | 2.30           | 0.10           | 2.43           | 18.90          | 4.61           | 0.80           | 0.80           | 0.64           | 1.80           | 2.40           | 0.50           | 3.40           | 0.30           | 0.10           | 0.20           |

%positive for each immunophenotypic marker



**Supplementary Table 6.** Direct comparison of up- and down-regulated genes between TCF3-ZNF384- and TCF3-PBX1-positive ALL.

A) High expression genes in *TCF3-ZNF384*-positive ALL in comparison with *TCF3-PBX1*-positive ALL

# Notes : UP - FC ([*TCF3-ZNF384*] vs [*TCF3-PBX1*])

#Only up-regulated entities from parent entity list :

#Fold change >= 2.0

#Entity List : Moderated T-Test p (Corr) cut-off = 0.01

#Fold-Change cut-off : 2.0

# Technology : Affymetrix.GeneChip.HG-U133\_Plus\_2

# Created On : Mon Feb 22 11:15:22 JST 2016

| Probe Set ID | Gene Symbol    | FC ([ <i>TCF3-ZNF384</i> ] vs [ <i>TCF3-PBX1</i> ]) | Log FC ([ <i>TCF3-ZNF384</i> ] vs [ <i>TCF3-PBX1</i> ]) | FC (abs) ([ <i>TCF3-ZNF384</i> ] vs [ <i>TCF3-PBX1</i> ]) | Regulation ([ <i>TCF3-ZNF384</i> ] vs [ <i>TCF3-PBX1</i> ]) | Alignments                                       |
|--------------|----------------|-----------------------------------------------------|---------------------------------------------------------|-----------------------------------------------------------|-------------------------------------------------------------|--------------------------------------------------|
| 236501_at    |                | 351.55493                                           | 8.457606                                                | 351.55493                                                 | up                                                          | chr20:50399783-50400264 (+) // 100.0 // q13.2    |
| 209602_s_at  | <b>GATA3</b>   | 215.06453                                           | 7.7486258                                               | 215.06453                                                 | up                                                          | chr10:8096669-8117213 (+) // 95.62 // p14        |
| 215447_at    |                | 164.76674                                           | 7.364281                                                | 164.76674                                                 | up                                                          | chr2:188391477-188393941 (-) // 85.71 // q32.1   |
| 227923_at    | <i>SHANK3</i>  | 136.94997                                           | 7.097505                                                | 136.94997                                                 | up                                                          | chr22:51159032-51171638 (+) // 92.82 // q13.33   |
| 210665_at    | <i>TFPI</i>    | 131.70592                                           | 7.0411763                                               | 131.70592                                                 | up                                                          | chr2:188343307-188419158 (-) // 94.74 // q32.1   |
| 227998_at    | <i>S100A16</i> | 129.66122                                           | 7.0186033                                               | 129.66122                                                 | up                                                          | chr1:153579361-153579825 (-) // 80.19 // q21.3   |
| 210664_s_at  | <i>TFPI</i>    | 120.55595                                           | 6.913559                                                | 120.55595                                                 | up                                                          | chr2:188343307-188419158 (-) // 94.74 // q32.1   |
| 229661_at    | <i>SALL4</i>   | 110.55964                                           | 6.788681                                                | 110.55964                                                 | up                                                          | chr20:50400584-50419014 (-) // 99.04 // q13.2    |
| 210432_s_at  | <i>SCN3A</i>   | 107.558136                                          | 6.748973                                                | 107.558136                                                | up                                                          | chr2:165944039-166060553 (-) // 98.62 // q24.3   |
| 211214_s_at  | <i>DAPK1</i>   | 63.018295                                           | 5.977699                                                | 63.018295                                                 | up                                                          | chr9:90112803-90260886 (+) // 88.99 // q21.33    |
| 209676_at    | <i>TFPI</i>    | 61.4267                                             | 5.940794                                                | 61.4267                                                   | up                                                          | chr2:188331284-188419050 (-) // 99.02 // q32.1   |
| 240704_at    |                | 60.87525                                            | 5.927784                                                | 60.87525                                                  | up                                                          | chr4:38986125-38986684 (-) // 98.21 // p14       |
| 228285_at    | <i>TDRD9</i>   | 60.621582                                           | 5.9217596                                               | 60.621582                                                 | up                                                          | chr14:104498392-104519002 (+) // 97.97 // q32.33 |
| 213258_at    | <i>TFPI</i>    | 55.573334                                           | 5.796321                                                | 55.573334                                                 | up                                                          | chr2:188328956-188330208 (-) // 77.08 // q32.1   |
| 209604_s_at  | <b>GATA3</b>   | 52.18489                                            | 5.70556                                                 | 52.18489                                                  | up                                                          | chr10:8096772-8116487 (+) // 96.76 // p14        |
| 241844_x_at  | <i>TMEM156</i> | 51.658                                              | 5.69092                                                 | 51.658                                                    | up                                                          | chr4:39029997-39034003 (-) // 55.15 // p14       |
| 203139_at    | <i>DAPK1</i>   | 46.47219                                            | 5.5382957                                               | 46.47219                                                  | up                                                          | chr9:90112795-90323543 (+) // 98.7 // q21.33     |
| 243041_s_at  |                | 43.913673                                           | 5.4565983                                               | 43.913673                                                 | up                                                          | chr3:30045699-30046192 (-) // 95.36 // p24.1     |
| 1556385_at   |                | 42.47982                                            | 5.4087057                                               | 42.47982                                                  | up                                                          | chr11:67136401-67138578 (-) // 98.18 // q13.2    |
| 237409_at    |                | 41.50143                                            | 5.375089                                                | 41.50143                                                  | up                                                          | chr9:90150658-90151402 (+) // 98.26 // q21.33    |
| 237277_at    |                | 40.826115                                           | 5.3514204                                               | 40.826115                                                 | up                                                          |                                                  |

|             |                         |           |           |           |    |                                                |
|-------------|-------------------------|-----------|-----------|-----------|----|------------------------------------------------|
| 214378_at   | <i>TFPI</i>             | 36.881622 | 5.20483   | 36.881622 | up | chr2:188393901-188419076 (-) // 57.23 // q32.1 |
| 209603_at   | <b>GATA3</b>            | 36.69304  | 5.1974344 | 36.69304  | up | chr10:8096669-8117213 (+) // 95.62 // p14      |
| 235525_at   |                         | 35.40135  | 5.1457324 | 35.40135  | up | chr11:67135600-67136522 (-) // 94.62 // q13.2  |
| 212062_at   | <i>ATP9A</i>            | 33.436306 | 5.0633435 | 33.436306 | up | chr20:50213053-50384867 (-) // 98.9 // q13.2   |
| 213912_at   | <i>TBC1D30</i>          | 31.861082 | 4.9937234 | 31.861082 | up | chr12:65179790-65272411 (+) // 97.45 // q14.3  |
| 213075_at   | <i>OLFML2A</i>          | 31.103302 | 4.958996  | 31.103302 | up | chr9:127575023-127577161 (+) // 50.92 // q33.3 |
| 220568_at   | <i>PRO1483</i>          | 29.253819 | 4.870553  | 29.253819 | up | chr11:33894740-33896541 (-) // 86.74 // p13    |
| 238447_at   | <i>RBMS3</i>            | 25.475231 | 4.6710234 | 25.475231 | up | chr3:30045651-30046619 (+) // 94.96 // p24.1   |
| 239901_at   |                         | 24.942371 | 4.640527  | 24.942371 | up | chr7:130782012-130782621 (-) // 75.22 // q32.3 |
| 238107_at   |                         | 24.701942 | 4.6265526 | 24.701942 | up | chr7:5465598-5466031 (+) // 97.09 // p22.1     |
| 209543_s_at | <i>CD34</i>             | 24.489225 | 4.614075  | 24.489225 | up | chr1:208059883-208084683 (-) // 99.92 // q32.2 |
| 242447_at   | <i>C3orf70</i>          | 24.30477  | 4.6031675 | 24.30477  | up | chr3:184795840-184796292 (-) // 95.96 // q27.2 |
| 232512_at   | <i>AC013463.2//OTTH</i> | 24.194412 | 4.596602  | 24.194412 | up | chr2:165944037-165950976 (+) // 98.66 // q24.3 |
| 235739_at   |                         | 23.682785 | 4.565767  | 23.682785 | up | chr2:157185089-157185685 (-) // 93.62 // q24.1 |
| 221555_x_at | <i>CDC14B</i>           | 23.634872 | 4.562845  | 23.634872 | up | chr9:99262396-99382112 (-) // 97.08 // q22.32  |
| 1553475_at  |                         | 23.550018 | 4.5576563 | 23.550018 | up | chr11:33894740-33896541 (+) // 86.74 // p13    |
| 215330_at   |                         | 22.60703  | 4.4986997 | 22.60703  | up | chr7:130756033-130757545 (-) // 43.78 // q32.3 |
| 221556_at   | <i>CDC14B</i>           | 22.122602 | 4.467449  | 22.122602 | up | chr9:99262396-99382112 (-) // 97.08 // q22.32  |
| 1559915_at  |                         | 21.935612 | 4.455203  | 21.935612 | up | chr7:2446140-2446701 (+) // 6.59 // p22.3      |
| 244507_at   |                         | 21.682022 | 4.4384274 | 21.682022 | up |                                                |
| 242768_at   |                         | 21.556469 | 4.430049  | 21.556469 | up | chr7:130724069-130724751 (+) // 98.55 // q32.3 |
| 220169_at   | <i>TMEM156</i>          | 21.515781 | 4.4273233 | 21.515781 | up | chr4:38968442-39034041 (-) // 83.94 // p14     |
| 210755_at   | <i>HGF</i>              | 21.505934 | 4.426663  | 21.505934 | up | chr7:81380204-81399341 (-) // 99.84 // q21.11  |
| 200951_s_at | <i>CCND2</i>            | 21.19411  | 4.4055915 | 21.19411  | up | chr12:4382937-4414519 (+) // 95.53 // p13.32   |
| 232227_at   | <i>OTTHUMG00000020</i>  | 20.96815  | 4.3901277 | 20.96815  | up | chr9:139543062-139554873 (-) // 96.19 // q34.3 |
| 219500_at   | <i>CLCF1</i>            | 20.5859   | 4.3635845 | 20.5859   | up | chr11:67131640-67141055 (-) // 100.0 // q13.2  |
| 215572_at   |                         | 20.581238 | 4.363258  | 20.581238 | up | chr15:79028393-79029441 (+) // 85.9 // q25.1   |
| 216248_s_at | <i>NR4A2</i>            | 20.567005 | 4.36226   | 20.567005 | up | chr2:157180968-157189041 (-) // 97.76 // q24.1 |
| 204439_at   | <i>IFI44L</i>           | 20.408747 | 4.3511157 | 20.408747 | up | chr1:79086148-79108069 (+) // 88.1 // p31.1    |
| 217963_s_at | <i>NGFRAP1</i>          | 20.367271 | 4.348181  | 20.367271 | up | chrX:102632108-102632999 (+) // 95.62 // q22.2 |
| 244665_at   |                         | 19.86805  | 4.3123784 | 19.86805  | up | chr2:173305926-173306286 (+) // 27.22 // q31.1 |
| 232231_at   | <i>RUNX2</i>            | 19.663122 | 4.2974205 | 19.663122 | up | chr6:45515256-45518818 (+) // 70.84 // p21.1   |
| 224098_at   |                         | 19.332603 | 4.272964  | 19.332603 | up |                                                |
| 206363_at   | <i>MAF</i>              | 19.215471 | 4.2641964 | 19.215471 | up | chr16:79628234-79634611 (-) // 80.05 // q23.2  |
| 233877_at   |                         | 18.761955 | 4.229738  | 18.761955 | up | chr3:167780202-167782051 (-) // 64.79 // q26.2 |
| 204622_x_at | <i>NR4A2</i>            | 18.49477  | 4.2090454 | 18.49477  | up | chr2:157180950-157189183 (-) // 98.45 // q24.1 |

|              |                           |            |           |            |    |                                                 |
|--------------|---------------------------|------------|-----------|------------|----|-------------------------------------------------|
| 228303_at    | <i>GALNT6</i>             | 17.745123  | 4.1493506 | 17.745123  | up | chr12:51745656-51746252 (-) // 73.65 // q13.13  |
| 220439_at    | <i>RIN3</i>               | 17.617071  | 4.138902  | 17.617071  | up | chr14:92980124-93123712 (+) // 63.54 // q32.12  |
| 224215_s_at  | <i>DLL1</i>               | 17.547852  | 4.1332226 | 17.547852  | up | chr6:170591329-170599480 (-) // 96.83 // q27    |
| 239453_at    |                           | 17.500717  | 4.129342  | 17.500717  | up | chr9:132684015-132684414 (-) // 55.73 // q34.11 |
| 1554343_a_at | <i>STAP1</i>              | 17.369461  | 4.118481  | 17.369461  | up | chr4:68424495-68472108 (+) // 85.47 // q13.2    |
| 1568574_x_at | <i>SPP1</i>               | 17.226189  | 4.1065316 | 17.226189  | up | chr4:88902881-88902950 (-) // 66.99 // q22.1    |
| 222378_at    |                           | 17.14175   | 4.0994425 | 17.14175   | up | chr7:130789419-130789808 (-) // 67.89 // q32.3  |
| 244367_at    |                           | 16.697874  | 4.0615926 | 16.697874  | up | chr11:33893152-33894633 (-) // 56.32 // p13     |
| 243716_at    |                           | 16.675499  | 4.059658  | 16.675499  | up | chr7:130793390-130794098 (+) // 72.83 // q32.3  |
| 216813_at    |                           | 16.410515  | 4.0365486 | 16.410515  | up | chr7:130729256-130732023 (-) // 17.51 // q32.3  |
| 1568768_s_at | <i>BRE-AS1</i>            | 16.32783   | 4.029261  | 16.32783   | up | chr2:28112513-28113955 (-) // 91.42 // p23.2    |
| 215177_s_at  | <i>ITGA6</i>              | 15.77611   | 3.9796696 | 15.77611   | up | chr2:173355948-173369965 (+) // 94.77 // q31.1  |
| 201656_at    | <i>ITGA6</i>              | 15.748847  | 3.9771743 | 15.748847  | up | chr2:173292369-173371002 (+) // 99.04 // q31.1  |
| 206674_at    | <i>FLT3</i>               | 15.715013  | 3.9740715 | 15.715013  | up | chr13:28577752-28674705 (-) // 99.14 // q12.2   |
| 220576_at    | <i>PGAP1</i>              | 15.471431  | 3.9515347 | 15.471431  | up | chr2:197712199-197791454 (-) // 98.69 // q33.1  |
| 201445_at    | <i>CNN3</i>               | 15.448304  | 3.9493766 | 15.448304  | up | chr1:95362765-95392638 (-) // 98.44 // p21.3    |
| 234196_at    |                           | 15.432147  | 3.947867  | 15.432147  | up | chr12:95014382-95016612 (-) // 90.09 // q22     |
| 230086_at    | <i>FNBP1</i>              | 15.365666  | 3.9416385 | 15.365666  | up | chr9:132686003-132687158 (-) // 94.46 // q34.11 |
| 220059_at    | <i>STAP1</i>              | 15.165187  | 3.9226913 | 15.165187  | up | chr4:68424445-68472611 (+) // 99.87 // q13.2    |
| 241801_at    | <i>PGAP1</i>              | 15.097853  | 3.9162714 | 15.097853  | up | chr2:197699064-197699967 (-) // 96.69 // q33.1  |
| 211612_s_at  | <i>IL13RA1</i>            | 14.960789  | 3.9031143 | 14.960789  | up | chrX:117861570-117925971 (+) // 91.6 // q24     |
| 230497_at    | <i>CELF5</i>              | 14.916127  | 3.898801  | 14.916127  | up | chr19:3296523-3297035 (+) // 87.43 // p13.3     |
| 202242_at    | <i>TSPAN7</i>             | 14.704514  | 3.8781872 | 14.704514  | up | chrX:38420796-38548171 (+) // 99.25 // p11.4    |
| 206115_at    | <i>EGR3</i>               | 14.620814  | 3.8699517 | 14.620814  | up | chr8:22545238-22550815 (-) // 90.46 // p21.3    |
| 204621_s_at  | <i>NR4A2</i>              | 14.449763  | 3.852974  | 14.449763  | up | chr2:157180950-157189212 (-) // 98.27 // q24.1  |
| 200953_s_at  | <i>CCND2</i>              | 14.423548  | 3.8503542 | 14.423548  | up | chr12:4382937-4414516 (+) // 97.58 // p13.32    |
| 220881_at    |                           | 14.423061  | 3.8503056 | 14.423061  | up | chr11:33902188-33903327 (+) // 80.34 // p13     |
| 1554438_at   | <i>KIAA1217</i>           | 14.410032  | 3.8490016 | 14.410032  | up | chr10:24738588-24834197 (+) // 99.09 // p12.1   |
| 204030_s_at  | <i>IQCJ-SCHIP1///SCH.</i> | 14.369294  | 3.8449173 | 14.369294  | up | chr3:158991543-159615139 (+) // 96.02 // q25.32 |
| 244286_at    |                           | 14.339094  | 3.841882  | 14.339094  | up | chr9:132676467-132677069 (-) // 62.11 // q34.11 |
| 219789_at    | <i>NPR3</i>               | 14.3308525 | 3.8410525 | 14.3308525 | up | chr5:32711539-32787428 (+) // 96.43 // p13.3    |
| 231259_s_at  | <i>CCND2</i>              | 14.183474  | 3.826139  | 14.183474  | up | chr12:4410863-4411609 (-) // 89.69 // p13.32    |
| 213913_s_at  | <i>TBC1D30</i>            | 14.060165  | 3.8135417 | 14.060165  | up | chr12:65179790-65272411 (+) // 97.45 // q14.3   |
| 209774_x_at  | <i>CXCL2</i>              | 13.99591   | 3.8069334 | 13.99591   | up | chr4:74962800-74964892 (-) // 95.02 // q13.3    |
| 217975_at    | <i>WBP5</i>               | 13.964167  | 3.8036575 | 13.964167  | up | chrX:102611422-102613381 (+) // 56.07 // q22.2  |
| 241740_at    |                           | 13.906892  | 3.797728  | 13.906892  | up | chr10:35496578-35497343 (+) // 76.95 // p11.21  |

|              |                  |           |           |           |    |                                                     |
|--------------|------------------|-----------|-----------|-----------|----|-----------------------------------------------------|
| 1566324_a_at | MAF              | 13.712525 | 3.7774224 | 13.712525 | up | chr16:79629404-79629760 (-) // 99.44 // q23.2       |
| 236571_at    |                  | 13.183776 | 3.7206917 | 13.183776 | up | chr12:8081182-8081891 (-) // 80.14 // p13.31        |
| 233479_at    |                  | 13.15197  | 3.717207  | 13.15197  | up | chr2:197714179-197716887 (-) // 42.4 // q33.1       |
| 210904_s_at  | IL13RA1          | 13.118112 | 3.713488  | 13.118112 | up | chrX:117861564-117895482 (+) // 97.18 // q24        |
| 228297_at    |                  | 13.073693 | 3.7085948 | 13.073693 | up | chr1:95362512-95362927 (+) // 88.38 // p21.3        |
| 226499_at    | NRARP            | 12.934911 | 3.6931982 | 12.934911 | up | chr9:140194101-140195761 (-) // 90.37 // q34.3      |
| 1569599_at   | SAMSN1           | 12.879844 | 3.6870432 | 12.879844 | up | chr21:15917482-15918636 (-) // 97.13 // q11.2       |
| 201888_s_at  | IL13RA1          | 12.667883 | 3.6631036 | 12.667883 | up | chrX:117861564-117926198 (+) // 98.13 // q24        |
| 1555536_at   | ANTXR2           | 12.657165 | 3.6618824 | 12.657165 | up | chr4:80898690-80993854 (-) // 99.85 // q21.21       |
| 1554836_at   | USP36            | 12.620778 | 3.657729  | 12.620778 | up | chr17:76822554-76836954 (-) // 95.62 // q25.3       |
| 216834_at    | RGS1             | 12.549594 | 3.6495688 | 12.549594 | up | chr1:192544936-192549152 (+) // 91.99 // q31.2      |
| 225167_at    | FRMD4A           | 12.355265 | 3.627054  | 12.355265 | up | chr10:13685705-14372883 (-) // 98.26 // p13         |
| 220637_at    | FAM124B          | 12.275198 | 3.6176744 | 12.275198 | up | chr2:225243415-225266751 (-) // 97.9 // q36.2       |
| 229589_x_at  | BIVM             | 12.118194 | 3.5991027 | 12.118194 | up | chr13:103493722-103493883 (-) // 58.97 // q33.1     |
| 234778_at    |                  | 11.632195 | 3.5400515 | 11.632195 | up | chr12:95014370-95016596 (+) // 90.62 // q22         |
| 234156_at    |                  | 11.620865 | 3.5386455 | 11.620865 | up | chr11:12238448-12241075 (+) // 83.04 // p15.3       |
| 235362_at    | LOC729970        | 11.462095 | 3.5187988 | 11.462095 | up | chr1:95392965-95394114 (+) // 88.71 // p21.3        |
| 233127_at    |                  | 11.236424 | 3.490111  | 11.236424 | up | chr19:54055002-54056546 (+) // 63.48 // q13.42      |
| 209875_s_at  | SPP1             | 11.223251 | 3.4884188 | 11.223251 | up | chr4:88896869-88904284 (+) // 99.69 // q22.1        |
| 214156_at    | MYRIP            | 11.212093 | 3.4869838 | 11.212093 | up | chr3:40285936-40301809 (+) // 91.64 // p22.1        |
| 220330_s_at  | SAMSN1           | 11.149861 | 3.4789538 | 11.149861 | up | chr21:15857548-15918664 (-) // 98.52 // q11.2       |
| 209457_at    | DUSP5            | 11.141318 | 3.477848  | 11.141318 | up | chr10:112257834-112271121 (+) // 96.59 // q25.2     |
| 241788_x_at  |                  | 10.972625 | 3.4558368 | 10.972625 | up | chr19:39144535-39145201 (+) // 57.85 // q13.2       |
| 1569289_at   | BIVM             | 10.9564   | 3.453702  | 10.9564   | up | chr13:103459876-103469565 (+) // 70.49 // q33.1     |
| 228293_at    | DEPDC7           | 10.907187 | 3.4472072 | 10.907187 | up | chr11:33037408-33055126 (+) // 95.85 // p13         |
| 205419_at    | GPR183           | 10.85269  | 3.4399807 | 10.85269  | up | chr13:99946795-99948417 (-) // 96.96 // q32.3       |
| 36711_at     | MAFF             | 10.8517   | 3.4398491 | 10.8517   | up | chr22:38609860-38612514 (+) // 77.19 // q13.1       |
| 201887_at    | IL13RA1          | 10.834415 | 3.4375494 | 10.834415 | up | chrX:117861558-117928496 (+) // 90.81 // q24        |
| 91682_at     |                  | 10.65041  | 3.412837  | 10.65041  | up | chr8:145133638-145134165 (+) // 79.32 // q24.3      |
| 214059_at    | IFI44            | 10.650227 | 3.4128122 | 10.650227 | up | chr1:79128920-79129756 (+) // 99.17 // p31.1        |
| 200952_s_at  | CCND2            | 10.550504 | 3.39924   | 10.550504 | up | chr12:4382937-4414519 (+) // 95.53 // p13.32        |
| 225168_at    | FRMD4A           | 10.549784 | 3.3991416 | 10.549784 | up | chr10:13685705-14372883 (-) // 98.26 // p13         |
| 1562056_at   | AC017002.2//OTTH | 10.515624 | 3.3944626 | 10.515624 | up | chr2:87749173-87758508 (+) // 38.1 //               |
| 44790_s_at   | KIAA0226L        | 10.483815 | 3.390092  | 10.483815 | up | p11.2//chr2:112249106-112258448 (-) // 38.35 // q13 |
| 234112_at    |                  | 10.419085 | 3.3811567 | 10.419085 | up | chr13:46917101-46919718 (-) // 93.09 // q14.13      |
|              |                  |           |           |           |    | chr3:105524146-105525355 (+) // 68.8 // q13.11      |

|              |                          |           |           |           |    |                                                 |
|--------------|--------------------------|-----------|-----------|-----------|----|-------------------------------------------------|
| 206907_at    | <i>TNFSF9</i>            | 10.390202 | 3.3771517 | 10.390202 | up | chr19:6531044-6535931 (+) // 77.08 // p13.3     |
| 219956_at    | <i>GALNT6</i>            | 10.365647 | 3.3737383 | 10.365647 | up | chr12:51747167-51773565 (-) // 78.24 // q13.13  |
| 235146_at    | <i>TMCC3</i>             | 10.292243 | 3.3634856 | 10.292243 | up | chr12:94960882-94961956 (-) // 99.91 // q22     |
| 202988_s_at  | <i>RGS1</i>              | 10.290282 | 3.3632107 | 10.290282 | up | chr1:192544950-192549071 (+) // 96.74 // q31.2  |
| 241824_at    |                          | 10.250752 | 3.357658  | 10.250752 | up | chr2:28619664-28620095 (+) // 81.86 // p23.2    |
| 1561167_at   |                          | 10.188367 | 3.348851  | 10.188367 | up | chr12:11867256-11867584 (+) // 94.49 // p13.2   |
| 1555638_a_at | <i>SAMSN1</i>            | 10.060425 | 3.3306193 | 10.060425 | up | chr21:15857954-15918662 (-) // 96.93 // q11.2   |
| 229643_at    | <i>AC078883.3//AC078</i> | 9.914544  | 3.3095465 | 9.914544  | up | chr2:173292473-173338943 (-) // 98.88 // q31.1  |
| 227379_at    | <i>MBOAT1</i>            | 9.896726  | 3.3069513 | 9.896726  | up | chr6:20100947-20144187 (-) // 73.78 // p22.3    |
| 241590_at    |                          | 9.835494  | 3.2979975 | 9.835494  | up | chr5:179464022-179464377 (-) // 37.36 // q35.3  |
| 219054_at    | <i>NPR3</i>              | 9.829764  | 3.2971568 | 9.829764  | up | chr5:32789180-32791823 (+) // 99.89 // p13.3    |
| 225262_at    | <i>FOSL2</i>             | 9.787187  | 3.2908943 | 9.787187  | up | chr2:28637668-28639558 (+) // 81.76 // p23.2    |
| 208109_s_at  | <i>LINC00597</i>         | 9.764852  | 3.2875981 | 9.764852  | up | chr15:77516251-77517746 (-) // 70.64 // q24.3   |
| 241789_at    | <i>RBMS3</i>             | 9.689934  | 3.2764869 | 9.689934  | up | chr3:30048084-30048527 (+) // 99.77 // p24.1    |
| 239886_at    |                          | 9.68447   | 3.2756732 | 9.68447   | up | chr5:179435008-179435435 (-) // 15.12 // q35.3  |
| 232914_s_at  | <i>SYTL2</i>             | 9.58278   | 3.2604442 | 9.58278   | up | chr11:85405326-85522178 (-) // 99.08 // q14.1   |
| 230389_at    | <i>FNBP1</i>             | 9.55879   | 3.256828  | 9.55879   | up | chr9:132681292-132682080 (-) // 96.68 // q34.11 |
| 213355_at    | <i>ST3GAL6</i>           | 9.533751  | 3.253044  | 9.533751  | up | chr3:98451159-98514689 (+) // 82.31 // q12.1    |
| 233614_at    |                          | 9.46248   | 3.2422183 | 9.46248   | up | chr3:105499524-105503015 (-) // 78.12 // q13.11 |
| 206767_at    | <i>RBMS3</i>             | 9.4045725 | 3.2333624 | 9.4045725 | up | chr3:29323024-30032755 (+) // 97.54 // p24.1    |
| 236226_at    | <i>BTLA</i>              | 9.30855   | 3.2185564 | 9.30855   | up | chr3:112184772-112185231 (-) // 98.28 // q13.2  |
| 225436_at    | <i>ABHD17C</i>           | 9.210726  | 3.2033148 | 9.210726  | up | chr15:80987491-81047960 (+) // 85.5 // q25.1    |
| 214453_s_at  | <i>IFI44</i>             | 9.176003  | 3.197866  | 9.176003  | up | chr1:79115518-79129697 (+) // 99.01 // p31.1    |
| 1565735_at   |                          | 9.055468  | 3.1787891 | 9.055468  | up | chr12:4397398-4400101 (+) // 96.3 // p13.32     |
| 1566323_at   | <i>MAF</i>               | 8.980224  | 3.1667514 | 8.980224  | up | chr16:79629404-79629760 (+) // 99.44 // q23.2   |
| 209348_s_at  | <i>MAF</i>               | 8.952435  | 3.16228   | 8.952435  | up | chr16:79630369-79634611 (-) // 87.31 // q23.2   |
| 212589_at    | <i>RRAS2</i>             | 8.94228   | 3.1606426 | 8.94228   | up | chr11:14299467-14317406 (-) // 92.78 // p15.2   |
| 230775_s_at  | <i>SPG20</i>             | 8.9283285 | 3.15839   | 8.9283285 | up | chr13:36909514-36920419 (+) // 100.0 // q13.3   |
| 235592_at    |                          | 8.903208  | 3.1543252 | 8.903208  | up | chr5:95243000-95243547 (-) // 82.8 // q15       |
| 244753_at    |                          | 8.893051  | 3.1526785 | 8.893051  | up | chr19:39143706-39144096 (+) // 57.4 // q13.2    |
| 239725_at    | <i>PGAP1</i>             | 8.885167  | 3.151399  | 8.885167  | up | chr2:197697716-197698062 (-) // 99.71 // q33.1  |
| 203373_at    | <i>SOCS2</i>             | 8.841601  | 3.1443076 | 8.841601  | up | chr12:93966458-93969978 (+) // 94.2 // q22      |
| 244815_at    |                          | 8.82574   | 3.1417172 | 8.82574   | up | chr17:76800785-76801199 (-) // 71.12 // q25.3   |
| 232058_at    |                          | 8.807093  | 3.138666  | 8.807093  | up | chr19:39155209-39158346 (+) // 90.53 // q13.2   |
| 228188_at    | <i>FOSL2</i>             | 8.731839  | 3.1262856 | 8.731839  | up | chr2:28637749-28640177 (+) // 91.09 // p23.2    |
| 230505_at    | <i>LOC145474</i>         | 8.689979  | 3.1193526 | 8.689979  | up | chr14:71954577-71956418 (+) // 86.05 // q24.2   |

|              |                      |           |           |              |                                                 |
|--------------|----------------------|-----------|-----------|--------------|-------------------------------------------------|
| 1559916_a_at |                      | 8.681058  | 3.1178708 | 8.681058 up  | chr7:2446140-2446701 (+) // 6.59 // p22.3       |
| 238986_at    | <i>FLJ43663</i>      | 8.632792  | 3.1098273 | 8.632792 up  | chr7:130792982-130793526 (-) // 81.07 // q32.3  |
| 226489_at    | <i>TMCC3</i>         | 8.607857  | 3.105654  | 8.607857 up  | chr12:94962342-95009837 (-) // 92.75 // q22     |
| 219334_s_at  | <i>NABP1</i>         | 8.54199   | 3.0945723 | 8.54199 up   | chr2:192542861-192552291 (+) // 91.62 // q32.3  |
| 222872_x_at  | <i>NABP1</i>         | 8.34948   | 3.0616863 | 8.34948 up   | chr2:192542870-192552291 (+) // 91.26 // q32.3  |
| 1563975_at   | <i>RNF130</i>        | 8.316484  | 3.0559738 | 8.316484 up  | chr5:179421666-179422621 (-) // 7.03 // q35.3   |
| 211887_x_at  | <i>MSR1</i>          | 8.296473  | 3.052498  | 8.296473 up  | chr8:15967593-16035497 (-) // 100.0 // p22      |
| 213993_at    | <i>SPON1</i>         | 8.290484  | 3.0514565 | 8.290484 up  | chr11:14288417-14289656 (+) // 94.95 // p15.2   |
| 237009_at    |                      | 8.281483  | 3.049889  | 8.281483 up  | chr12:9910668-9911147 (-) // 97.76 // p13.31    |
| 202686_s_at  | <i>AXL</i>           | 8.238475  | 3.0423772 | 8.238475 up  | chr19:41724822-41767670 (+) // 91.33 // q13.2   |
| 229789_at    | <i>TIGD3</i>         | 8.165921  | 3.0296156 | 8.165921 up  | chr11:65122289-65125080 (+) // 99.34 // q13.1   |
| 233255_s_at  | <i>BIVM</i>          | 8.164259  | 3.029322  | 8.164259 up  | chr13:103472736-103492498 (+) // 92.22 // q33.1 |
| 233201_at    |                      | 8.133733  | 3.0239177 | 8.133733 up  | chr2:197714179-197716887 (+) // 42.4 // q33.1   |
| 243993_at    |                      | 8.117878  | 3.0211027 | 8.117878 up  | chr12:96752770-96753212 (-) // 76.33 // q23.1   |
| 240038_at    |                      | 8.085126  | 3.0152702 | 8.085126 up  | chr5:95241464-95241927 (-) // 100.0 // q15      |
| 243454_at    |                      | 8.05305   | 3.0095353 | 8.05305 up   | chr12:11960851-11961371 (+) // 81.58 // p13.2   |
| 237483_at    |                      | 8.046693  | 3.008396  | 8.046693 up  | chr12:19404356-19404673 (+) // 9.85 // p12.3    |
| 205027_s_at  | <i>MAP3K8</i>        | 8.030216  | 3.0054388 | 8.030216 up  | chr10:30723192-30750761 (+) // 96.92 // p11.23  |
| 242836_at    |                      | 8.018398  | 3.003314  | 8.018398 up  | chr3:141610954-141611493 (+) // 34.04 // q23    |
| 232473_at    |                      | 7.986599  | 2.9975812 | 7.986599 up  | chr10:13689748-13691669 (-) // 79.6 // p13      |
| 220030_at    | <i>STYK1</i>         | 7.954763  | 2.991819  | 7.954763 up  | chr12:10771537-10826639 (-) // 90.75 // p13.2   |
| 241279_at    |                      | 7.8820252 | 2.9785664 | 7.8820252 up | chr10:70849686-70850424 (-) // 60.32 // q22.1   |
| 222761_at    | <i>BIVM</i>          | 7.8815813 | 2.978485  | 7.8815813 up | chr13:103451504-103494222 (+) // 91.27 // q33.1 |
| 230788_at    | <i>GCNT2</i>         | 7.8736753 | 2.9770372 | 7.8736753 up | chr6:10629228-10629600 (+) // 71.73 // p24.2    |
| 229327_s_at  |                      | 7.82161   | 2.9674656 | 7.82161 up   | chr16:79631220-79632352 (+) // 94.61 // q23.2   |
| 215146_s_at  | <i>TTC28</i>         | 7.802289  | 2.9638975 | 7.802289 up  | chr22:28377255-28501665 (-) // 99.76 // q12.1   |
| 212501_at    | <i>CEBPB</i>         | 7.758969  | 2.955865  | 7.758969 up  | chr20:48807124-48809209 (+) // 75.8 // q13.13   |
| 242814_at    | <i>SERPINB9</i>      | 7.737862  | 2.951935  | 7.737862 up  | chr6:2893303-2893707 (-) // 88.02 // p25.2      |
| 1557551_at   |                      | 7.7257047 | 2.9496665 | 7.7257047 up | chr17:76753088-76755640 (-) // 36.07 // q25.3   |
| 225496_s_at  | <i>SYTL2</i>         | 7.658395  | 2.937042  | 7.658395 up  | chr11:85405263-85426180 (-) // 97.27 // q14.1   |
| 207610_s_at  | <i>EMR2</i>          | 7.6335216 | 2.9323487 | 7.6335216 up | chr19:14846368-14887637 (-) // 97.52 // p13.12  |
| 228568_at    | <i>GCOM1///MYZAP</i> | 7.5789676 | 2.9220014 | 7.5789676 up | chr15:57922013-57977558 (+) // 98.6 // q21.3    |
| 229265_at    | <i>SKI</i>           | 7.568429  | 2.9199939 | 7.568429 up  | chr1:2241285-2241652 (+) // 85.15 // p36.33     |
| 58696_at     | <i>EXOSC4</i>        | 7.551534  | 2.9167697 | 7.551534 up  | chr8:145133562-145135551 (+) // 89.61 // q24.3  |
| 244321_at    | <i>PGAP1</i>         | 7.4598827 | 2.899153  | 7.4598827 up | chr2:197706061-197712079 (-) // 88.7 // q33.1   |
| 233085_s_at  | <i>NABP1</i>         | 7.450585  | 2.8973536 | 7.450585 up  | chr2:192548211-192551664 (+) // 85.35 // q32.3  |

|             |                   |           |           |           |    |                                                      |
|-------------|-------------------|-----------|-----------|-----------|----|------------------------------------------------------|
| 207315_at   | CD226             | 7.441619  | 2.8956165 | 7.441619  | up | chr18:67530194-67624160 (-) // 89.13 // q22.2        |
| 204270_at   | SKI               | 7.378307  | 2.8832898 | 7.378307  | up | chr1:2160133-2241006 (+) // 96.42 // p36.33          |
| 213058_at   | TTC28             | 7.3392286 | 2.8756285 | 7.3392286 | up | chr22:28374003-28386064 (-) // 91.41 // q12.1        |
| 231387_at   | PXDC1             | 7.3265724 | 2.8731384 | 7.3265724 | up | chr6:3722433-3723316 (+) // 92.93 // p25.2           |
| 222314_x_at | EGOT              | 7.322611  | 2.872358  | 7.322611  | up | chr3:4792427-4793239 (-) // 87.1 // p26.1            |
|             |                   |           |           |           |    | chrX:2652753-2653637 (+) // 81.49 //                 |
| 230161_at   |                   | 7.29228   | 2.86637   | 7.29228   | up | p22.33///chrY:2602753-2603637 (+) // 81.49 // p11.31 |
| 238619_at   |                   | 7.2793283 | 2.8638053 | 7.2793283 | up | chr7:130614967-130616209 (-) // 99.36 // q32.3       |
| 229228_at   | CREB5///LOC40131; | 7.200769  | 2.848151  | 7.200769  | up | chr7:28865040-28865508 (+) // 95.12 // p14.3         |
| 1554676_at  | SRGN              | 7.1880436 | 2.8455992 | 7.1880436 | up | chr10:70847862-70848929 (+) // 91.65 // q22.1        |
| 244026_at   |                   | 7.185294  | 2.8450472 | 7.185294  | up | chr5:95269512-95269993 (-) // 98.57 // q15           |
| 213083_at   | SLC35D2           | 7.1047845 | 2.828791  | 7.1047845 | up | chr9:99082987-99145954 (-) // 91.73 // q22.32        |
| 204547_at   | RAB40B            | 7.0719523 | 2.8221085 | 7.0719523 | up | chr17:80614948-80656513 (-) // 99.58 // q25.3        |
| 203372_s_at | SOCS2             | 7.065895  | 2.8208723 | 7.065895  | up | chr12:93966635-93969024 (+) // 100.0 // q22          |
| 214508_x_at | CREM              | 7.0618477 | 2.8200457 | 7.0618477 | up | chr10:35484975-35500890 (+) // 98.92 // p11.21       |
| 202878_s_at | CD93              | 7.0423408 | 2.816055  | 7.0423408 | up | chr20:23059994-23066977 (-) // 98.64 // p11.21       |
| 243659_at   |                   | 7.0401034 | 2.8155966 | 7.0401034 | up | chr5:95243542-95244158 (-) // 63.88 // q15           |
| 1559509_at  |                   | 7.037259  | 2.8150136 | 7.037259  | up | chr8:101706808-101709043 (-) // 55.25 // q22.3       |
| 237164_at   |                   | 7.021088  | 2.8116946 | 7.021088  | up | chr12:109225162-109225908 (+) // 57.49 // q24.11     |
| 204614_at   | SERPINB2          | 7.000274  | 2.8074114 | 7.000274  | up | chr18:61554941-61571120 (+) // 97.32 // q21.33       |
| 224978_s_at | USP36             | 6.9805784 | 2.8033466 | 6.9805784 | up | chr17:76783548-76836980 (-) // 93.44 // q25.3        |
| 213082_s_at | SLC35D2           | 6.971031  | 2.801372  | 6.971031  | up | chr9:99082987-99145954 (-) // 91.73 // q22.32        |
| 237459_at   |                   | 6.922756  | 2.7913465 | 6.922756  | up | chr12:96725255-96725738 (-) // 87.4 // q23.1         |
| 224056_at   |                   | 6.906072  | 2.7878654 | 6.906072  | up | chr17:63026323-63027071 (-) // 50.77 // q24.1        |
| 219569_s_at | SLC35G2           | 6.905625  | 2.787772  | 6.905625  | up | chr3:136537977-136574729 (+) // 98.52 // q22.3       |
| 242216_at   |                   | 6.898748  | 2.7863345 | 6.898748  | up | chr10:22201914-22202368 (-) // 99.34 // p12.31       |
| 1562373_at  |                   | 6.8679104 | 2.7798712 | 6.8679104 | up | chr3:4885825-4888806 (-) // 85.65 // p26.1           |
| 205193_at   | MAFF              | 6.8369374 | 2.7733502 | 6.8369374 | up | chr22:38598017-38612510 (+) // 77.3 // q13.1         |
| 227093_at   | USP36             | 6.8318324 | 2.7722726 | 6.8318324 | up | chr17:76791733-76795066 (-) // 97.21 // q25.3        |
| 218881_s_at | FOSL2             | 6.7913284 | 2.7636938 | 6.7913284 | up | chr2:28635790-28637514 (+) // 94.67 // p23.2         |
| 213060_s_at | CHI3L2            | 6.748856  | 2.754643  | 6.748856  | up | chr1:111772332-111786062 (+) // 92.13 // p13.3       |
| 219471_at   | KIAA0226L         | 6.737807  | 2.752279  | 6.737807  | up | chr13:46917101-46961384 (-) // 99.28 // q14.13       |
| 220613_s_at | SYTL2             | 6.7302113 | 2.7506518 | 6.7302113 | up | chr11:85444653-85468788 (-) // 82.64 // q14.1        |
| 227425_at   | REPS2             | 6.7003922 | 2.7442455 | 6.7003922 | up | chrX:17169413-17171395 (+) // 97.54 // p22.13        |
| 232614_at   |                   | 6.6823235 | 2.7403498 | 6.6823235 | up | chr18:60944825-60945901 (-) // 27.73 // q21.33       |
| 212590_at   | RRAS2             | 6.681868  | 2.7402515 | 6.681868  | up | chr11:14299467-14317406 (-) // 92.78 // p15.2        |

|              |                         |           |           |              |                                                       |
|--------------|-------------------------|-----------|-----------|--------------|-------------------------------------------------------|
| 231428_at    |                         | 6.6784186 | 2.7395065 | 6.6784186 up | chr6:7890885-7891566 (-) // 71.64 // p24.3            |
| 201170_s_at  | <i>BHLHE40</i>          | 6.6782584 | 2.739472  | 6.6782584 up | chr3:5021207-5026861 (+) // 96.65 // p26.1            |
| 230511_at    | <i>CREM</i>             | 6.6628957 | 2.7361493 | 6.6628957 up | chr10:35501340-35501886 (+) // 96.13 // p11.21        |
| 220983_s_at  | <i>MIR612///NEAT1</i>   | 6.6610613 | 2.735752  | 6.6610613 up | chr5:141690005-141704566 (-) // 58.7 // q31.3         |
| 204530_s_at  | <i>TOX</i>              | 6.6504703 | 2.7334564 | 6.6504703 up | chr8:59717976-60031767 (-) // 98.98 // q12.1          |
| 215878_at    | <i>ITGB1</i>            | 6.647183  | 2.732743  | 6.647183 up  | chr10:33195872-33197373 (-) // 63.81 // p11.22        |
| 1561966_at   |                         | 6.6432405 | 2.731887  | 6.6432405 up | chr3:15799660-15803693 (+) // 68.98 // p25.1          |
| 220877_at    |                         | 6.624235  | 2.7277539 | 6.624235 up  |                                                       |
| 228702_at    | <i>FLJ43663</i>         | 6.621305  | 2.7271156 | 6.621305 up  | chr7:130628925-130629917 (-) // 95.83 // q32.3        |
| 221696_s_at  | <i>STYK1</i>            | 6.6199856 | 2.726828  | 6.6199856 up | chr12:10771781-10826891 (-) // 98.11 // p13.2         |
| 237837_at    |                         | 6.5912943 | 2.7205617 | 6.5912943 up | chr18:60874922-60875400 (+) // 98.76 // q21.33        |
| 226982_at    | <i>ELL2</i>             | 6.537862  | 2.708819  | 6.537862 up  | chr5:95220803-95222242 (-) // 97.56 // q15            |
| 231329_at    |                         | 6.497184  | 2.6998146 | 6.497184 up  | chr3:4771520-4771900 (+) // 96.2 // p26.1             |
| 1557811_a_at |                         | 6.4940615 | 2.699121  | 6.4940615 up | chr16:23947925-23948344 (-) // 25.38 // p12.2         |
| 223196_s_at  | <i>SESN2</i>            | 6.4885454 | 2.697895  | 6.4885454 up | chr1:28586182-28609001 (+) // 99.4 // p35.3           |
| 227697_at    | <i>SOCS3</i>            | 6.462321  | 2.6920524 | 6.462321 up  | chr17:76352858-76353327 (-) // 88.84 // q25.3         |
| 216129_at    | <i>ATP9A</i>            | 6.457443  | 2.690963  | 6.457443 up  | chr20:50254276-50256695 (-) // 51.59 // q13.2         |
| 1567008_at   |                         | 6.4446254 | 2.6880965 | 6.4446254 up | chr16:75076350-75076898 (+) // 41.61 // q23.1         |
| 212288_at    | <i>FNBP1</i>            | 6.4083033 | 2.6799424 | 6.4083033 up | chr9:132649465-132805473 (-) // 91.51 // q34.11       |
| 1563335_at   | <i>IRGM</i>             | 6.3148046 | 2.6587381 | 6.3148046 up | chr5:150228058-150280295 (+) // 77.33 // q33.1        |
| 204324_s_at  | <i>GOLIM4</i>           | 6.3088675 | 2.657381  | 6.3088675 up | chr3:167727653-167813086 (-) // 95.29 // q26.2        |
| 212923_s_at  | <i>PXDC1</i>            | 6.2967143 | 2.6545992 | 6.2967143 up | chr6:3722852-3751780 (-) // 96.22 // p25.2            |
| 212558_at    | <i>SPRY1</i>            | 6.281029  | 2.651001  | 6.281029 up  | chr4:124320664-124324910 (+) // 97.83 // q28.1        |
| 1560893_at   |                         | 6.278081  | 2.6503236 | 6.278081 up  | chr10:114716294-114716950 (+) // 89.15 // q25.2       |
| 1562576_at   |                         | 6.27252   | 2.6490452 | 6.27252 up   | chr7:112118573-112120779 (-) // 74.93 // q31.1        |
| 220370_s_at  | <i>USP36</i>            | 6.2662015 | 2.647591  | 6.2662015 up | chr17:76783469-76836887 (-) // 94.28 // q25.3         |
| 221283_at    | <i>RUNX2</i>            | 6.2276573 | 2.6386895 | 6.2276573 up | chr6:45390313-45515042 (-) // 90.94 // p21.1          |
| 226632_at    | <i>CYGB</i>             | 6.2217646 | 2.6373239 | 6.2217646 up | chr17:74523437-74533767 (-) // 89.66 // q25.1         |
| 1560492_at   |                         | 6.214252  | 2.6355808 | 6.214252 up  | chr12:94182680-94184240 (+) // 67.82 // q22           |
| 225524_at    | <i>ANTXR2</i>           | 6.2046914 | 2.6333594 | 6.2046914 up | chr4:80826724-80905126 (-) // 93.94 // q21.21         |
| 202499_s_at  | <i>SLC2A3</i>           | 6.19445   | 2.6309762 | 6.19445 up   | chr12:8071826-8088871 (-) // 89.96 // p13.31          |
|              |                         |           |           |              | chr12:7965107-7965839 (-) // 97.84 //                 |
| 222088_s_at  | <i>SLC2A14///SLC2A3</i> | 6.165705  | 2.624266  | 6.165705 up  | p13.31///chr12:8071828-8072848 (-) // 92.32 // p13.31 |
| 1563348_at   |                         | 6.136181  | 2.617341  | 6.136181 up  | chr3:23946781-23947286 (+) // 9.46 // p24.2           |
| 241620_at    | <i>SMCHD1</i>           | 6.1265783 | 2.6150815 | 6.1265783 up | chr18:2705895-2706494 (+) // 80.79 // p11.32          |
| 216236_s_at  | <i>SLC2A14///SLC2A3</i> | 6.1154957 | 2.6124694 | 6.1154957 up | chr12:7966124-8025847 (-) // 96.89 // p13.31          |



|              |                  |           |           |           |    |                                                 |
|--------------|------------------|-----------|-----------|-----------|----|-------------------------------------------------|
| 235350_at    | <i>C4orf19</i>   | 6.074614  | 2.6027927 | 6.074614  | up | chr4:37594314-37595143 (+) // 44.03 // p14      |
| 202498_s_at  | <i>SLC2A3</i>    | 6.0717535 | 2.6021132 | 6.0717535 | up | chr12:8071825-8088871 (-) // 89.03 // p13.31    |
| 1556950_s_at | <i>SERPINB6</i>  | 6.061478  | 2.5996697 | 6.061478  | up | chr6:2966567-2968803 (-) // 19.64 // p25.2      |
| 235380_at    |                  | 6.055142  | 2.5981607 | 6.055142  | up | chr10:45927201-45928529 (+) // 17.09 // q11.21  |
| 222326_at    |                  | 6.052304  | 2.5974844 | 6.052304  | up | chr1:66822753-66823108 (+) // 62.81 // p31.3    |
| 209967_s_at  | <i>CREM</i>      | 6.025706  | 2.5911303 | 6.025706  | up | chr10:35484054-35501078 (+) // 94.33 // p11.21  |
| 216966_at    | <i>ITGA2B</i>    | 6.0148196 | 2.5885215 | 6.0148196 | up | chr17:42452078-42453552 (-) // 48.73 // q21.31  |
| 240475_at    | <i>EGOT</i>      | 6.0135593 | 2.5882192 | 6.0135593 | up | chr3:4790879-4792920 (-) // 100.0 // p26.1      |
| 235421_at    | <i>MAP3K8</i>    | 6.0030127 | 2.5856867 | 6.0030127 | up | chr10:30725044-30725631 (+) // 88.87 // p11.23  |
| 219257_s_at  | <i>SPHK1</i>     | 5.9920893 | 2.583059  | 5.9920893 | up | chr17:74380745-74383941 (+) // 98.49 // q25.1   |
| 241969_at    | <i>ARID5B</i>    | 5.9526067 | 2.5735216 | 5.9526067 | up | chr10:63832689-63833144 (+) // 99.34 // q21.2   |
| 203708_at    | <i>PDE4B</i>     | 5.9303694 | 2.568122  | 5.9303694 | up | chr1:66797686-66839942 (+) // 89.92 // p31.3    |
| 242021_at    | <i>XBP1</i>      | 5.9096236 | 2.5630662 | 5.9096236 | up | chr22:28795019-28795445 (-) // 54.03 // q12.1   |
| 241371_at    | <i>TNFRSF10A</i> | 5.8897915 | 2.5582166 | 5.8897915 | up | chr8:23047968-23048455 (-) // 27.98 // p21.3    |
| 216178_x_at  | <i>ITGB1</i>     | 5.887455  | 2.5576441 | 5.887455  | up | chr10:33190474-33197373 (-) // 90.44 // p11.22  |
| 238210_at    |                  | 5.8800564 | 2.55583   | 5.8800564 | up | chr3:133916862-133917343 (-) // 67.27 // q22.2  |
| 230170_at    | <i>OSM</i>       | 5.856127  | 2.5499468 | 5.856127  | up | chr22:30658817-30659232 (-) // 94.35 // q12.2   |
| 243583_at    |                  | 5.854709  | 2.5495975 | 5.854709  | up | chr10:114739621-114740344 (-) // 95.85 // q25.2 |
| 207630_s_at  | <i>CREM</i>      | 5.844753  | 2.547142  | 5.844753  | up | chr10:35437299-35500752 (+) // 98.53 // p11.21  |
| 218695_at    | <i>EXOSC4</i>    | 5.820813  | 2.5412207 | 5.820813  | up | chr8:145133528-145135550 (+) // 98.77 // q24.3  |
| 1554486_a_at | <i>GFOD1</i>     | 5.8190556 | 2.540785  | 5.8190556 | up | chr6:13469510-13486978 (-) // 68.4 // p23       |
| 236982_at    |                  | 5.772088  | 2.5290933 | 5.772088  | up | chr21:46295258-46295717 (+) // 68.32 // q22.3   |
| 207761_s_at  | <i>METTL7A</i>   | 5.7640038 | 2.5270712 | 5.7640038 | up | chr12:51318801-51326288 (+) // 89.79 // q13.12  |
| 202497_x_at  | <i>SLC2A3</i>    | 5.7360883 | 2.5200672 | 5.7360883 | up | chr12:8071825-8088871 (-) // 89.03 // p13.31    |
| 235841_at    |                  | 5.707361  | 2.5128238 | 5.707361  | up | chr4:141070782-141072308 (-) // 95.24 // q31.1  |
| 215671_at    | <i>PDE4B</i>     | 5.679495  | 2.5057626 | 5.679495  | up | chr1:66834352-66835833 (+) // 82.06 // p31.3    |
| 243343_at    |                  | 5.6571608 | 2.5000782 | 5.6571608 | up | chr22:29712730-29713196 (-) // 71.18 // q12.2   |
| 1560443_at   |                  | 5.6521425 | 2.498798  | 5.6521425 | up | chr18:2778279-2780236 (+) // 39.72 // p11.32    |
| 206548_at    |                  | 5.633963  | 2.4941502 | 5.633963  | up | chr10:114830800-114833452 (+) // 58.61 // q25.2 |
| 229238_at    | <i>C17orf97</i>  | 5.6283536 | 2.492713  | 5.6283536 | up | chr17:263642-264230 (+) // 84.1 // p13.3        |
| 240432_x_at  | <i>KLF7</i>      | 5.6251082 | 2.491881  | 5.6251082 | up | chr2:207939809-207940236 (-) // 91.16 // q33.3  |
| 239045_at    |                  | 5.6199813 | 2.4905653 | 5.6199813 | up | chr17:62203291-62203917 (-) // 98.27 // q23.3   |
| 242320_at    |                  | 5.6154413 | 2.4893994 | 5.6154413 | up | chr6:108917142-108917585 (+) // 64.6 // q21     |
| 238002_at    | <i>GOLIM4</i>    | 5.5851455 | 2.4815948 | 5.5851455 | up | chr3:167726468-167727236 (-) // 89.82 // q26.2  |
| 243213_at    | <i>STAT3</i>     | 5.577087  | 2.4795117 | 5.577087  | up | chr17:40539050-40539480 (-) // 99.77 // q21.2   |
| 227579_at    | <i>FER</i>       | 5.576072  | 2.4792492 | 5.576072  | up | chr5:108530975-108532539 (+) // 98.86 // q21.3  |

|             |                   |           |           |              |                                                  |
|-------------|-------------------|-----------|-----------|--------------|--------------------------------------------------|
| 236987_at   |                   | 5.57151   | 2.4780684 | 5.57151 up   | chr18:56201552-56202025 (-) // 70.56 // q21.32   |
| 204529_s_at | TOX               | 5.5678687 | 2.4771252 | 5.5678687 up | chr8:59717976-60031767 (-) // 98.36 // q12.1     |
| 237588_at   |                   | 5.5546813 | 2.473704  | 5.5546813 up | chr18:2787843-2788250 (+) // 86.57 // p11.32     |
| 204684_at   | NPTX1             | 5.5432296 | 2.4707267 | 5.5432296 up | chr17:78440947-78450398 (-) // 95.29 // q25.3    |
| 213566_at   | RNASE6            | 5.524938  | 2.4659584 | 5.524938 up  | chr14:21249243-21250620 (+) // 96.05 // q11.2    |
| 232009_at   | EMR2              | 5.513381  | 2.4629374 | 5.513381 up  | chr19:14843204-14876384 (-) // 50.65 // p13.12   |
| 60471_at    | RIN3              | 5.509747  | 2.461986  | 5.509747 up  | chr14:93154759-93155338 (+) // 96.98 // q32.12   |
| 227062_at   | MIR612///NEAT1    | 5.4854703 | 2.4556153 | 5.4854703 up | chr11:65195730-65196514 (+) // 67.47 // q13.1    |
| 213346_at   | TEX30             | 5.4821043 | 2.4547298 | 5.4821043 up | chr13:103418464-103422620 (-) // 85.07 // q33.1  |
| 209191_at   | TUBB6             | 5.477548  | 2.4535303 | 5.477548 up  | chr18:12308256-12326567 (+) // 98.43 // p11.21   |
| 239809_at   |                   | 5.462221  | 2.4494877 | 5.462221 up  | chr2:207998899-207999351 (-) // 96.38 // q33.3   |
| 230333_at   |                   | 5.451167  | 2.4465652 | 5.451167 up  | chrX:23802705-23803157 (-) // 98.26 // p22.11    |
| 225239_at   | MIR612///NEAT1    | 5.4414806 | 2.4439993 | 5.4414806 up | chr11:65206882-65208335 (+) // 35.59 // q13.1    |
| 1567009_at  |                   | 5.4380016 | 2.4430766 | 5.4380016 up | chr16:75076360-75076898 (-) // 41.61 // q23.1    |
| 243771_at   |                   | 5.4289813 | 2.4406815 | 5.4289813 up | chr20:37544700-37545349 (+) // 22.46 // q11.23   |
| 1566965_at  |                   | 5.4200373 | 2.4383028 | 5.4200373 up | chr1:97594625-97595338 (+) // 58.26 // p21.3     |
| 212473_s_at | MICAL2            | 5.419868  | 2.4382577 | 5.419868 up  | chr11:12282278-12285332 (+) // 96.98 // p15.3    |
| 240052_at   | ITPR1             | 5.410115  | 2.4356592 | 5.410115 up  | chr3:4818753-4819472 (+) // 93.86 // p26.1       |
| 202877_s_at | CD93              | 5.4065733 | 2.4347146 | 5.4065733 up | chr20:23059996-23066977 (-) // 98.54 // p11.21   |
| 231775_at   | TNFRSF10A         | 5.388524  | 2.4298902 | 5.388524 up  | chr8:23048579-23082629 (-) // 78.95 // p21.3     |
| 227983_at   | RILPL2            | 5.3752756 | 2.4263387 | 5.3752756 up | chr12:123899931-123920673 (-) // 83.29 // q24.31 |
| 1564796_at  | EMP1              | 5.3482995 | 2.4190803 | 5.3482995 up | chr12:13349719-13350708 (+) // 65.96 // p13.1    |
| 224979_s_at | USP36             | 5.3465967 | 2.4186208 | 5.3465967 up | chr17:76783548-76836980 (-) // 93.44 // q25.3    |
| 233813_at   | PPP1R16B          | 5.336889  | 2.415999  | 5.336889 up  | chr20:37467955-37469996 (+) // 39.75 // q11.23   |
| 242405_at   |                   | 5.33176   | 2.4146118 | 5.33176 up   | chr11:95954852-95955313 (-) // 91.65 // q21      |
| 241621_at   | SMCHD1            | 5.3208036 | 2.4116442 | 5.3208036 up | chr18:2705908-2706499 (-) // 80.3 // p11.32      |
| 203320_at   | SH2B3             | 5.306194  | 2.4076774 | 5.306194 up  | chr12:111843751-111889426 (+) // 91.76 // q24.12 |
| 232504_at   | LOC285628///MIR14 | 5.2999015 | 2.4059656 | 5.2999015 up | chr5:159912448-159914445 (+) // 50.42 // q34     |
| 224863_at   | GNAQ              | 5.295278  | 2.4047065 | 5.295278 up  | chr9:80331010-80333889 (-) // 97.85 // q21.2     |
| 233379_at   | PRR5L             | 5.277289  | 2.399797  | 5.277289 up  | chr11:36398943-36400755 (+) // 86.25 // p13      |
| 244787_at   |                   | 5.2772393 | 2.3997834 | 5.2772393 up | chr9:74964593-74965731 (-) // 98.43 // q21.13    |
| 216171_at   |                   | 5.2656674 | 2.3966165 | 5.2656674 up | chr7:132493886-132496104 (+) // 39.55 // q32.3   |
| 1569477_at  |                   | 5.259121  | 2.3948216 | 5.259121 up  | chr6:108953629-108955041 (+) // 89.87 // q21     |
| 236238_at   |                   | 5.256661  | 2.3941467 | 5.256661 up  | chr9:80581737-80582364 (-) // 99.52 // q21.2     |
| 1554903_at  | FRMD8             | 5.254547  | 2.3935664 | 5.254547 up  | chr11:65154107-65154728 (+) // 86.03 // q13.1    |
| 214933_at   | CACNA1A           | 5.2431293 | 2.390428  | 5.2431293 up | chr19:13317255-13368214 (-) // 96.36 // p13.2    |

|             |                           |           |           |              |                                                 |
|-------------|---------------------------|-----------|-----------|--------------|-------------------------------------------------|
| 238032_at   |                           | 5.2111545 | 2.381603  | 5.2111545 up | chr1:12674727-12675378 (-) // 95.8 // p36.22    |
| 225799_at   | <i>LINC00152</i> ///LOC54 | 5.203915  | 2.3795974 | 5.203915 up  | chr2:87754980-87821032 (+) // 89.44 // p11.2    |
| 238517_at   | <i>KLF7</i>               | 5.199494  | 2.3783712 | 5.199494 up  | chr2:207940788-207942106 (-) // 98.87 // q33.3  |
| 234501_x_at |                           | 5.1880503 | 2.3751924 | 5.1880503 up |                                                 |
| 239600_at   |                           | 5.165008  | 2.3687706 | 5.165008 up  | chr14:71932726-71933297 (+) // 78.71 // q24.2   |
| 218035_s_at | <i>RBM47</i>              | 5.1579256 | 2.366791  | 5.1579256 up | chr4:40425740-40517968 (-) // 97.34 // p14      |
| 229744_at   | <i>SSFA2</i>              | 5.1541324 | 2.3657296 | 5.1541324 up | chr2:182758544-182759422 (+) // 97.56 // q31.3  |
| 209679_s_at | <i>SMAGP</i>              | 5.1537123 | 2.365612  | 5.1537123 up | chr12:51639137-51639894 (-) // 98.06 // q13.13  |
| 1557534_at  | <i>LOC339862</i>          | 5.137371  | 2.3610303 | 5.137371 up  | chr3:18308508-18310408 (+) // 80.54 // p24.3    |
| 241353_s_at | <i>LOC100507507</i>       | 5.132976  | 2.3597956 | 5.132976 up  | chr7:143076786-143077654 (-) // 84.39 // q34    |
| 205931_s_at | <i>CREB5</i> ///LOC40131  | 5.1243615 | 2.3573723 | 5.1243615 up | chr7:28475233-28859617 (+) // 92.63 // p15.1    |
| 213493_at   | <i>SNED1</i>              | 5.1229806 | 2.3569834 | 5.1229806 up | chr2:242031858-242034982 (+) // 93.73 // q37.3  |
| 216046_at   |                           | 5.117294  | 2.355381  | 5.117294 up  | chr15:85545792-85546870 (+) // 63.38 // q25.3   |
| 229395_at   | <i>STX4</i>               | 5.092816  | 2.3484635 | 5.092816 up  | chr16:31045339-31046197 (+) // 69.78 // p11.2   |
| 222069_s_at |                           | 5.05837   | 2.3386726 | 5.05837 up   | chr14:93154386-93154917 (-) // 99.62 // q32.12  |
| 238320_at   | <i>MIR612</i> ///NEAT1    | 5.0576353 | 2.338463  | 5.0576353 up | chr11:65202405-65204500 (+) // 61.12 // q13.1   |
| 208456_s_at | <i>RRAS2</i>              | 5.055208  | 2.3377705 | 5.055208 up  | chr11:14300882-14380416 (-) // 100.0 // p15.2   |
| 236398_s_at | <i>OTTHUMG00000038</i>    | 5.007316  | 2.3240376 | 5.007316 up  | chr1:235095412-235098846 (-) // 94.33 // q42.3  |
| 239409_at   |                           | 4.9884977 | 2.3186054 | 4.9884977 up | chr1:112197046-112197856 (+) // 35.85 // p13.2  |
| 211426_x_at | <i>GNAQ</i>               | 4.985214  | 2.3176556 | 4.985214 up  | chr9:80334482-80646191 (-) // 99.59 // q21.2    |
| 232210_at   |                           | 4.9793687 | 2.3159628 | 4.9793687 up | chr18:60974088-60976901 (-) // 83.39 // q21.33  |
| 228585_at   | <i>ENTPD1</i>             | 4.9768543 | 2.3152342 | 4.9768543 up | chr10:97636304-97637022 (+) // 82.67 // q24.1   |
| 241929_at   |                           | 4.9737234 | 2.3143263 | 4.9737234 up | chr7:80283743-80284830 (+) // 69.58 // q21.11   |
| 241460_at   |                           | 4.9566865 | 2.309376  | 4.9566865 up | chrX:20198233-20198687 (-) // 100.0 // p22.12   |
| 229307_at   | <i>ANKRD28</i>            | 4.937781  | 2.3038628 | 4.937781 up  | chr3:15822941-15839579 (-) // 90.26 // p25.1    |
| 237849_at   |                           | 4.9372716 | 2.303714  | 4.9372716 up | chr6:119502630-119503241 (-) // 53.57 // q22.31 |
| 232213_at   | <i>PELI1</i>              | 4.9158063 | 2.2974281 | 4.9158063 up | chr2:64329987-64371588 (-) // 64.32 // p14      |
| 206733_at   | <i>TULP2</i>              | 4.911925  | 2.2962885 | 4.911925 up  | chr19:49384221-49401938 (-) // 98.15 // q13.33  |
| 234153_at   |                           | 4.888389  | 2.289359  | 4.888389 up  | chr6:158476761-158478597 (-) // 87.6 // q25.3   |
| 1559756_at  | <i>DKFZp667F0711</i>      | 4.8763485 | 2.2858012 | 4.8763485 up | chr10:6392277-6394723 (+) // 45.64 // p15.1     |
| 238157_at   |                           | 4.875281  | 2.2854853 | 4.875281 up  | chr18:56342224-56342683 (+) // 75.89 // q21.32  |
| 39548_at    | <i>NPAS2</i>              | 4.8721566 | 2.2845604 | 4.8721566 up | chr2:101436612-101612781 (+) // 92.7 // q11.2   |
| 234474_x_at | <i>IL6ST</i>              | 4.871621  | 2.284402  | 4.871621 up  | chr5:55244705-55247334 (+) // 88.89 // q11.2    |
| 240413_at   | <i>PYHIN1</i>             | 4.865458  | 2.2825756 | 4.865458 up  | chr1:158946486-158946838 (+) // 69.89 // q23.1  |
| 1569929_at  |                           | 4.85938   | 2.2807722 | 4.85938 up   | chrX:153322778-153323186 (-) // 24.78 // q28    |
| 244633_at   |                           | 4.832042  | 2.272633  | 4.832042 up  | chr18:44420949-44421904 (-) // 97.73 // q21.1   |

|              |                         |           |           |              |                                                                                                                                  |
|--------------|-------------------------|-----------|-----------|--------------|----------------------------------------------------------------------------------------------------------------------------------|
| 1565557_at   |                         | 4.8255424 | 2.2706912 | 4.8255424 up |                                                                                                                                  |
| 223217_s_at  | <i>NFKBIZ</i>           | 4.8167133 | 2.268049  | 4.8167133 up | chr3:101568424-101579866 (+) // 90.1 // q12.3                                                                                    |
| 218880_at    | <i>FOSL2</i>            | 4.8151317 | 2.2675753 | 4.8151317 up | chr2:28635258-28637514 (+) // 95.23 // p23.2                                                                                     |
| 237548_at    |                         | 4.805784  | 2.264772  | 4.805784 up  | chr2:173996512-173996933 (+) // 98.59 // q31.1                                                                                   |
| 211020_at    | <i>GCNT2</i>            | 4.794751  | 2.261456  | 4.794751 up  | chr6:10556402-10627190 (+) // 100.0 // p24.3                                                                                     |
| 1554905_x_at | <i>FRMD8</i>            | 4.780563  | 2.2571805 | 4.780563 up  | chr11:65154107-65154728 (+) // 86.03 // q13.1                                                                                    |
| 1560058_at   | <i>LOC399900</i>        | 4.7763133 | 2.2558975 | 4.7763133 up | chr11:61735253-61736962 (+) // 70.01 // q12.3                                                                                    |
| 243054_at    |                         | 4.7518573 | 2.2484915 | 4.7518573 up | chr10:188908-189467 (+) // 98.41 // p15.3                                                                                        |
| 232528_at    |                         | 4.7361746 | 2.2437222 | 4.7361746 up | chr2:181919579-181920809 (+) // 25.69 // q31.3                                                                                   |
| 230348_at    | <i>LATS2</i>            | 4.7170076 | 2.237872  | 4.7170076 up | chr13:21554171-21554626 (-) // 78.41 // q12.11                                                                                   |
| 242581_at    | <i>MAP3K15</i>          | 4.696722  | 2.2316542 | 4.696722 up  | chrX:19372145-19373408 (-) // 71.27 // p22.12                                                                                    |
| 219228_at    | <i>ZNF331</i>           | 4.6922445 | 2.2302783 | 4.6922445 up | chr19:54042041-54081332 (+) // 93.22 // q13.42                                                                                   |
| 205945_at    | <i>IL6R</i>             | 4.6870923 | 2.2286932 | 4.6870923 up | chr1:154377668-154439327 (+) // 89.27 // q21.3                                                                                   |
| 1557349_at   | <i>RERE</i>             | 4.6793    | 2.2262926 | 4.6793 up    | chr1:8525029-8813897 (-) // 93.29 // p36.23                                                                                      |
| 202615_at    | <i>GNAQ</i>             | 4.664436  | 2.2217026 | 4.664436 up  | chr9:80333284-80646374 (-) // 96.04 // q21.2                                                                                     |
| 223195_s_at  | <i>SESN2</i>            | 4.6640043 | 2.221569  | 4.6640043 up | chr1:28586025-28609001 (+) // 98.69 // p35.3                                                                                     |
| 236907_at    |                         | 4.658096  | 2.2197404 | 4.658096 up  | chr8:101731630-101732108 (-) // 100.0 // q22.3                                                                                   |
| 1554158_at   | <i>ZMYND11</i>          | 4.6454563 | 2.2158203 | 4.6454563 up | chr10:180642-295201 (+) // 96.15 // p15.3                                                                                        |
| 231127_at    |                         | 4.613056  | 2.2057228 | 4.613056 up  | chr12:69041367-69041841 (-) // 90.57 // q15                                                                                      |
| 232685_at    |                         | 4.60357   | 2.202753  | 4.60357 up   | chr12:11921815-11923835 (+) // 92.01 // p13.2                                                                                    |
| 228434_at    | <i>BTNL9</i>            | 4.602766  | 2.202501  | 4.602766 up  | chr5:180487889-180488521 (+) // 6.05 // q35.3                                                                                    |
| 207776_s_at  | <i>CACNB2</i>           | 4.600752  | 2.2018697 | 4.600752 up  | chr10:18549697-18829302 (+) // 98.89 // p12.33                                                                                   |
| 228667_at    | <i>AGPAT4</i>           | 4.597725  | 2.20092   | 4.597725 up  | chr6:161551051-161556499 (-) // 93.13 // q26                                                                                     |
| 227964_at    | <i>FRMD8</i>            | 4.5943675 | 2.1998663 | 4.5943675 up | chr11:65180565-65180993 (+) // 51.75 // q13.1                                                                                    |
|              |                         |           |           |              | chr16:72924-75121 (+) // 60.1 // p13.3//chrY:59347295-59349493 (-) // 59.62 // q12//chrX:155244289-155246487 (-) // 59.62 // q28 |
| 1568838_at   | <i>WASIR1//WASIR1//</i> | 4.589495  | 2.1983354 | 4.589495 up  | chr15:90890818-90892669 (-) // 100.0 // q26.1                                                                                    |
| 211458_s_at  | <i>GABARAPL1//GABA</i>  | 4.5866957 | 2.1974552 | 4.5866957 up | chr3:4535137-4888187 (+) // 99.53 // p26.1                                                                                       |
| 211323_s_at  | <i>ITPR1</i>            | 4.5845146 | 2.196769  | 4.5845146 up | chr7:99798282-99798880 (-) // 96.75 // q22.1                                                                                     |
| 227321_at    | <i>GATS</i>             | 4.583022  | 2.1962993 | 4.583022 up  | chr4:38676412-38677218 (+) // 61.53 // p14                                                                                       |
| 224350_at    |                         | 4.5741687 | 2.1935096 | 4.5741687 up | chr7:99775346-99812003 (+) // 99.21 // q22.1                                                                                     |
| 219753_at    | <i>STAG3</i>            | 4.5732827 | 2.1932302 | 4.5732827 up | chr18:44416208-44500123 (-) // 97.82 // q21.1                                                                                    |
| 1555513_at   | <i>PIAS2</i>            | 4.5692134 | 2.1919458 | 4.5692134 up | chr11:61717841-61731518 (+) // 91.33 // q12.3                                                                                    |
| 1554442_at   | <i>BEST1</i>            | 4.5661955 | 2.1909926 | 4.5661955 up | chr13:24871761-24876600 (+) // 70.33 // q12.12                                                                                   |
| 1556601_a_at | <i>SPATA13</i>          | 4.5524745 | 2.186651  | 4.5524745 up | chr17:292229-295731 (-) // 73.27 // p13.3                                                                                        |
| 226876_at    | <i>FAM101B</i>          | 4.546607  | 2.1847904 | 4.546607 up  |                                                                                                                                  |

|              |                   |           |           |           |    |                                                                                                                                                                                                                                                                                                                                                              |
|--------------|-------------------|-----------|-----------|-----------|----|--------------------------------------------------------------------------------------------------------------------------------------------------------------------------------------------------------------------------------------------------------------------------------------------------------------------------------------------------------------|
| 208869_s_at  | GABARAPL1         | 4.5439563 | 2.183949  | 4.5439563 | up | chr12:10365448-10375722 (+) // 98.5 // p13.2<br>chr16:22496040-22496882 (+) // 85.91 //<br>p12.2///chr16:29546601-29547445 (-) // 73.34 //<br>p11.2///chr16:30286586-30287430 (-) // 80.68 //<br>p11.2///chr16:29444834-29445679 (-) // 73.34 //<br>p11.2///chr16:21896905-21897747 (-) // 86.03 //<br>p12.2///chr16:21464662-21465504 (-) // 85.91 // p12.2 |
| 244766_at    | LOC100271836///LO | 4.53786   | 2.182012  | 4.53786   | up |                                                                                                                                                                                                                                                                                                                                                              |
| 234618_at    |                   | 4.5344715 | 2.1809344 | 4.5344715 | up |                                                                                                                                                                                                                                                                                                                                                              |
| 201324_at    | EMP1              | 4.5242395 | 2.1776752 | 4.5242395 | up | chr12:13349656-13369707 (+) // 97.24 // p13.1                                                                                                                                                                                                                                                                                                                |
| 221245_s_at  | FZD5              | 4.5124683 | 2.1739168 | 4.5124683 | up | chr2:208627335-208629415 (-) // 97.66 // q33.3                                                                                                                                                                                                                                                                                                               |
| 1562255_at   | SYTL3             | 4.497374  | 2.1690829 | 4.497374  | up | chr6:159126349-159130903 (+) // 74.61 // q25.3                                                                                                                                                                                                                                                                                                               |
| 224862_at    | GNAQ              | 4.4856286 | 2.1653101 | 4.4856286 | up | chr9:80331010-80333889 (-) // 97.85 // q21.2                                                                                                                                                                                                                                                                                                                 |
| 234967_at    | IL6ST             | 4.482949  | 2.164448  | 4.482949  | up | chr5:55244705-55247334 (-) // 88.89 // q11.2                                                                                                                                                                                                                                                                                                                 |
| 227613_at    | ZNF331            | 4.48268   | 2.1643615 | 4.48268   | up | chr19:54081757-54083238 (+) // 35.6 // q13.42                                                                                                                                                                                                                                                                                                                |
| 208868_s_at  | GABARAPL1         | 4.4810724 | 2.163844  | 4.4810724 | up | chr12:10365448-10375731 (+) // 98.25 // p13.2                                                                                                                                                                                                                                                                                                                |
| 1555055_at   | AVL9              | 4.469801  | 2.1602106 | 4.469801  | up | chr7:32535185-33079034 (+) // 97.5 // p14.3                                                                                                                                                                                                                                                                                                                  |
| 222409_at    | CORO1C            | 4.460085  | 2.157071  | 4.460085  | up | chr12:109038888-109125293 (-) // 98.11 // q24.11                                                                                                                                                                                                                                                                                                             |
| 204334_at    | KLF7              | 4.4542127 | 2.1551704 | 4.4542127 | up | chr2:207943711-208030739 (-) // 94.27 // q33.3                                                                                                                                                                                                                                                                                                               |
| 202747_s_at  | ITM2A             | 4.452025  | 2.1544616 | 4.452025  | up | chrX:78616466-78622850 (-) // 96.95 // q21.1                                                                                                                                                                                                                                                                                                                 |
| 225612_s_at  | B3GNT5            | 4.448376  | 2.1532788 | 4.448376  | up | chr3:182988592-182991172 (+) // 98.81 // q27.1                                                                                                                                                                                                                                                                                                               |
| 224861_at    | GNAQ              | 4.4382663 | 2.1499963 | 4.4382663 | up | chr9:80331010-80333889 (-) // 97.85 // q21.2                                                                                                                                                                                                                                                                                                                 |
| 236511_at    |                   | 4.4307165 | 2.14754   | 4.4307165 | up | chr12:12647709-12648170 (+) // 46.33 // p13.2                                                                                                                                                                                                                                                                                                                |
| 227013_at    | LATS2             | 4.425248  | 2.1457584 | 4.425248  | up | chr13:21547177-21548279 (-) // 95.66 // q12.11                                                                                                                                                                                                                                                                                                               |
| 241435_at    |                   | 4.4176645 | 2.1432838 | 4.4176645 | up | chr11:128379468-128379938 (-) // 53.4 // q24.3                                                                                                                                                                                                                                                                                                               |
| 243876_at    |                   | 4.415482  | 2.142571  | 4.415482  | up | chr9:132733343-132733701 (-) // 45.31 // q34.11                                                                                                                                                                                                                                                                                                              |
| 239751_at    | AC016831.7///OTTH | 4.4111753 | 2.141163  | 4.4111753 | up | chr7:130612277-130612844 (+) // 96.21 // q32.3                                                                                                                                                                                                                                                                                                               |
| 228488_at    | TBC1D16           | 4.4097786 | 2.1407063 | 4.4097786 | up | chr17:77906077-77907136 (-) // 99.72 // q25.3                                                                                                                                                                                                                                                                                                                |
| 204440_at    | CD83              | 4.3945537 | 2.1357167 | 4.3945537 | up | chr6:14118001-14137107 (+) // 90.06 // p23                                                                                                                                                                                                                                                                                                                   |
| 214211_at    | FTH1              | 4.394534  | 2.1357102 | 4.394534  | up | chr11:61731758-61732269 (-) // 71.33 // q12.3                                                                                                                                                                                                                                                                                                                |
| 207734_at    | LAX1              | 4.365036  | 2.1259935 | 4.365036  | up | chr1:203738763-203744743 (+) // 58.31 // q32.1                                                                                                                                                                                                                                                                                                               |
| 216979_at    | NR4A3             | 4.362247  | 2.1250715 | 4.362247  | up | chr9:102584178-102596341 (+) // 88.02 // q22.33                                                                                                                                                                                                                                                                                                              |
| 1569703_a_at |                   | 4.3541775 | 2.1224003 | 4.3541775 | up | chr12:109043412-109044697 (+) // 59.97 // q24.11                                                                                                                                                                                                                                                                                                             |
| 209295_at    | TNFRSF10B         | 4.339734  | 2.1176066 | 4.339734  | up | chr8:22877645-22926516 (-) // 84.97 // p21.3                                                                                                                                                                                                                                                                                                                 |
| 207671_s_at  | BEST1             | 4.338362  | 2.1171505 | 4.338362  | up | chr11:61717847-61731919 (+) // 99.95 // q12.3                                                                                                                                                                                                                                                                                                                |
| 205409_at    | FOSL2             | 4.3365817 | 2.1165583 | 4.3365817 | up | chr2:28616584-28635435 (+) // 100.0 // p23.2                                                                                                                                                                                                                                                                                                                 |
| 213940_s_at  | FNBP1             | 4.3365235 | 2.116539  | 4.3365235 | up | chr9:132657365-132741657 (-) // 85.84 // q34.11                                                                                                                                                                                                                                                                                                              |

|                               |           |           |              |                                                        |
|-------------------------------|-----------|-----------|--------------|--------------------------------------------------------|
| 243527_at                     | 4.336475  | 2.1165228 | 4.336475 up  | chr1:112188585-112189071 (+) // 97.37 // p13.2         |
| 226905_at <i>FAM101B</i>      | 4.3352513 | 2.1161156 | 4.3352513 up | chr17:289772-290778 (-) // 75.74 // p13.3              |
| 202340_x_at <i>NR4A1</i>      | 4.333246  | 2.1154482 | 4.333246 up  | chr12:52445246-52453284 (+) // 95.37 // q13.13         |
| 239673_at                     | 4.333165  | 2.1154213 | 4.333165 up  | chr4:149340069-149340662 (-) // 99.83 // q31.23        |
| 228577_x_at <i>ODF2L</i>      | 4.331109  | 2.1147366 | 4.331109 up  | chr1:86813719-86826437 (-) // 93.63 // p22.3           |
| 234233_s_at                   | 4.330619  | 2.1145732 | 4.330619 up  | chr12:13373568-13374826 (+) // 59.23 // p13.1          |
|                               |           |           |              | chr1:120910664-120912800 (+) // 10.63 //               |
|                               |           |           |              | p11.2///chr1:149392422-149394565 (-) // 15.2 //        |
| 1555968_a_at                  | 4.313279  | 2.1087852 | 4.313279 up  | q21.2///chr1:149777429-149779567 (-) // 11.23 // q21.2 |
| 201566_x_at <i>ID2</i>        | 4.3050294 | 2.106023  | 4.3050294 up | chr2:8822197-8824368 (+) // 97.24 // p25.1             |
| 238482_at <i>KLF7</i>         | 4.303647  | 2.1055598 | 4.303647 up  | chr2:207943159-207943736 (-) // 100.0 // q33.3         |
| 243638_at                     | 4.303344  | 2.105458  | 4.303344 up  | chr6:163881349-163881741 (+) // 100.0 // q26           |
| 239740_at <i>ETV6</i>         | 4.29892   | 2.1039743 | 4.29892 up   | chr12:11803002-11803415 (+) // 96.03 // p13.2          |
| 232064_at <i>FER</i>          | 4.298131  | 2.1037095 | 4.298131 up  | chr5:108528990-108531037 (+) // 95.71 // q21.3         |
| 205645_at <i>REPS2</i>        | 4.2962284 | 2.1030707 | 4.2962284 up | chrX:16964813-17165735 (+) // 92.21 // p22.2           |
| 209795_at <i>CD69</i>         | 4.2897525 | 2.1008945 | 4.2897525 up | chr12:9905085-9913489 (-) // 99.64 // p13.31           |
| 1554835_a_at <i>B3GNT5</i>    | 4.2785387 | 2.0971181 | 4.2785387 up | chr3:182983089-182988820 (+) // 94.66 // q27.1         |
| 215879_at <i>ITGB1</i>        | 4.2730837 | 2.0952775 | 4.2730837 up | chr10:33195872-33197373 (+) // 63.81 // p11.22         |
| 226444_at                     | 4.27257   | 2.0951042 | 4.27257 up   | chr2:196524214-196525637 (+) // 87.14 // q32.3         |
| 201169_s_at <i>BHLHE40</i>    | 4.269332  | 2.0940104 | 4.269332 up  | chr3:5021142-5026866 (+) // 93.93 // p26.1             |
| 1564151_at                    | 4.264888  | 2.0925078 | 4.264888 up  | chr13:23794021-23947936 (-) // 52.05 // q12.12         |
| 243528_at                     | 4.2371407 | 2.083091  | 4.2371407 up | chr8:17064857-17065379 (+) // 91.74 // p22             |
| 1553792_at <i>KIAA1109</i>    | 4.220701  | 2.0774827 | 4.220701 up  | chr4:123183916-123197340 (+) // 97.04 // q27           |
| 243915_at                     | 4.2146177 | 2.0754018 | 4.2146177 up | chr17:66240609-66241342 (+) // 31.45 // q24.2          |
| 240106_at <i>GNPTAB</i>       | 4.211414  | 2.0743046 | 4.211414 up  | chr12:102159538-102159965 (-) // 93.93 // q23.2        |
| 209723_at <i>SERPINB9</i>     | 4.2109747 | 2.0741541 | 4.2109747 up | chr6:2887505-2903507 (-) // 57.09 // p25.2             |
| 215042_at <i>BMP6</i>         | 4.200734  | 2.0706415 | 4.200734 up  | chr6:7881550-7889842 (+) // 99.02 // p24.3             |
| 235568_at <i>C19orf59</i>     | 4.1945567 | 2.0685184 | 4.1945567 up | chr19:7741975-7744713 (+) // 93.56 // p13.2            |
| 1563357_at                    | 4.1925826 | 2.0678391 | 4.1925826 up | chr6:2887602-2888080 (+) // 21.82 // p25.2             |
| 1559469_s_at <i>SIPA1L2</i>   | 4.1881905 | 2.066327  | 4.1881905 up | chr1:232649621-232651330 (-) // 98.16 // q42.2         |
| 1563473_at                    | 4.176528  | 2.062304  | 4.176528 up  | chr20:37438655-37444723 (+) // 55.6 // q11.23          |
| 235171_at <i>LOC100505501</i> | 4.174045  | 2.0614462 | 4.174045 up  | chr8:60032539-60033906 (+) // 98.55 // q12.1           |
| 1555420_a_at <i>KLF7</i>      | 4.173191  | 2.061151  | 4.173191 up  | chr2:207945087-208031571 (-) // 95.89 // q33.3         |
| 211302_s_at <i>PDE4B</i>      | 4.1691203 | 2.059743  | 4.1691203 up | chr1:66258863-66839187 (+) // 99.65 // p31.3           |
| 226099_at <i>ELL2</i>         | 4.168667  | 2.059586  | 4.168667 up  | chr5:95222194-95224470 (-) // 93.99 // q15             |
| 1554536_at <i>DPYD</i>        | 4.1666923 | 2.0589025 | 4.1666923 up | chr1:98185393-98386600 (-) // 93.24 // p21.3           |

|              |                     |           |           |              |                                                  |
|--------------|---------------------|-----------|-----------|--------------|--------------------------------------------------|
| 225055_at    | <i>LINC00674</i>    | 4.1665487 | 2.058853  | 4.1665487 up | chr17:66122232-66127003 (+) // 91.46 // q24.2    |
| 1563498_s_at | <i>SLC25A45</i>     | 4.1618867 | 2.0572376 | 4.1618867 up | chr11:65138847-65147149 (-) // 77.77 // q13.1    |
| 1556983_a_at |                     | 4.1594167 | 2.0563812 | 4.1594167 up | chr11:9764866-9765431 (+) // 19.13 // p15.4      |
| 244315_at    | <i>PLSCR1</i>       | 4.15398   | 2.0544941 | 4.15398 up   | chr3:146244999-146245953 (-) // 71.88 // q24     |
| 236216_at    |                     | 4.1533284 | 2.054268  | 4.1533284 up | chr10:114748705-114749120 (+) // 76.16 // q25.2  |
| 229801_at    | <i>PROSER2</i>      | 4.150646  | 2.053336  | 4.150646 up  | chr10:11912029-11912981 (+) // 83.96 // p14      |
| 213755_s_at  |                     | 4.1447897 | 2.0512989 | 4.1447897 up | chr1:2238618-2239117 (-) // 100.0 // p36.33      |
| 219227_at    | <i>CCNJL</i>        | 4.1307435 | 2.0464015 | 4.1307435 up | chr5:159678670-159682703 (-) // 99.74 // q33.3   |
| 235777_at    | <i>ANKRD44</i>      | 4.1167107 | 2.041492  | 4.1167107 up | chr2:197964193-197986168 (-) // 96.48 // q33.1   |
| 1564093_at   | <i>NEK1</i>         | 4.1166315 | 2.0414643 | 4.1166315 up | chr4:170521058-170523289 (-) // 75.32 // q33     |
| 202672_s_at  | <i>ATF3</i>         | 4.1141396 | 2.0405908 | 4.1141396 up | chr1:212782112-212794099 (+) // 99.27 // q32.3   |
| 211474_s_at  | <i>SERPINB6</i>     | 4.113251  | 2.0402792 | 4.113251 up  | chr1:46744417-46746936 (+) // 54.39 // p34.1     |
| 1566734_at   | <i>LOC283454</i>    | 4.1105404 | 2.039328  | 4.1105404 up | chr12:117293949-117295968 (+) // 57.16 // q24.22 |
| 1567380_at   |                     | 4.1101956 | 2.039207  | 4.1101956 up | chr10:126467361-126467665 (-) // 50.99 // q26.13 |
| 1570042_a_at | <i>ADAM9</i>        | 4.1101117 | 2.0391777 | 4.1101117 up | chr8:38854504-38873535 (+) // 84.4 // p11.22     |
| 221676_s_at  | <i>CORO1C</i>       | 4.096301  | 2.0343218 | 4.096301 up  | chr12:109040347-109125280 (-) // 96.49 // q24.11 |
| 224929_at    | <i>TMEM173</i>      | 4.093064  | 2.0331812 | 4.093064 up  | chr5:138855112-138862343 (-) // 77.08 // q31.2   |
| 220740_s_at  | <i>SLC12A6</i>      | 4.092283  | 2.0329058 | 4.092283 up  | chr15:34525665-34610930 (-) // 99.97 // q14      |
| 38037_at     | <i>HBEGF</i>        | 4.088255  | 2.031485  | 4.088255 up  | chr5:139712427-139726133 (-) // 90.34 // q31.3   |
| 202746_at    | <i>ITM2A</i>        | 4.0701733 | 2.0250902 | 4.0701733 up | chrX:78615880-78623047 (-) // 94.39 // q21.1     |
| 216944_s_at  | <i>ITPR1</i>        | 4.069608  | 2.02489   | 4.069608 up  | chr3:4558175-4888428 (+) // 99.44 // p26.1       |
| 236781_at    |                     | 4.0675726 | 2.024168  | 4.0675726 up | chr6:34958902-34959303 (+) // 95.38 // p21.31    |
| 241722_x_at  |                     | 4.063598  | 2.0227578 | 4.063598 up  | chr1:150544803-150545335 (-) // 46.36 // q21.3   |
| 1557865_at   | <i>LOC100505658</i> | 4.046468  | 2.016663  | 4.046468 up  | chr5:140937877-140944827 (+) // 94.73 // q31.3   |
| 240960_at    |                     | 4.046108  | 2.0165348 | 4.046108 up  | chrX:64888977-64889692 (+) // 80.27 // q12       |
| 223746_at    | <i>STK4</i>         | 4.036923  | 2.013256  | 4.036923 up  | chr20:43595155-43601541 (+) // 96.82 // q13.12   |
| 1562454_at   |                     | 4.0367155 | 2.013182  | 4.0367155 up | chr10:114859011-114861521 (+) // 66.67 // q25.2  |
| 1553266_at   | <i>CNOT6L</i>       | 4.0326576 | 2.011731  | 4.0326576 up | chr4:78647158-78740522 (-) // 99.94 // q21.1     |
| 216976_s_at  | <i>RYK</i>          | 4.0307274 | 2.0110402 | 4.0307274 up | chr3:133876768-133969598 (-) // 92.23 // q22.2   |
| 1552423_at   | <i>ETV3</i>         | 4.029756  | 2.0106926 | 4.029756 up  | chr1:157102938-157108266 (-) // 84.14 // q23.1   |
| 230051_at    | <i>PROSER2</i>      | 4.0196724 | 2.007078  | 4.0196724 up | chr10:11913518-11914274 (+) // 96.42 // p14      |
| 1569791_at   | <i>STK4</i>         | 4.0042872 | 2.0015454 | 4.0042872 up | chr20:43595193-43604324 (+) // 76.92 // q13.12   |
| 201694_s_at  | <i>EGR1</i>         | 3.98868   | 1.9959114 | 3.98868 up   | chr5:137801181-137805004 (+) // 91.0 // q31.2    |
| 228113_at    | <i>RAB37</i>        | 3.9819558 | 1.9934772 | 3.9819558 up | chr17:72742510-72743474 (+) // 80.43 // q25.1    |
| 236199_at    |                     | 3.9759867 | 1.991313  | 3.9759867 up | chr10:45925406-45926079 (+) // 40.86 // q11.21   |
| 241193_at    | <i>ETS2</i>         | 3.9755585 | 1.9911575 | 3.9755585 up | chr21:40182062-40182549 (-) // 73.31 // q22.2    |

|              |                          |           |           |              |                                                    |
|--------------|--------------------------|-----------|-----------|--------------|----------------------------------------------------|
| 215595_x_at  |                          | 3.9721987 | 1.9899378 | 3.9721987 up | chr6:10531892-10534033 (+) // 33.01 // p24.3       |
| 220398_at    | <i>GNPTAB</i>            | 3.9709373 | 1.9894795 | 3.9709373 up | chr12:102189653-102224621 (-) // 93.33 // q23.2    |
| 1570600_at   | <i>OTTHUMG00000175</i>   | 3.9666026 | 1.9879038 | 3.9666026 up | chr9:140188319-140190173 (-) // 85.02 // q34.3     |
| 233054_at    | <i>CNOT2</i>             | 3.953972  | 1.9833027 | 3.953972 up  | chr12:70637234-70739846 (+) // 88.88 // q15        |
| 230276_at    | <i>FAM49A</i>            | 3.9496593 | 1.9817282 | 3.9496593 up | chr2:16730726-16731295 (-) // 88.87 // p24.2       |
| 207691_x_at  | <i>ENTPD1</i>            | 3.9427965 | 1.9792192 | 3.9427965 up | chr10:97515929-97626359 (+) // 99.89 // q24.1      |
| 233867_at    |                          | 3.937874  | 1.977417  | 3.937874 up  | chr5:60702778-60703934 (-) // 14.6 // q12.1        |
| 242784_at    |                          | 3.9366605 | 1.9769723 | 3.9366605 up | chr21:40179164-40180125 (-) // 95.35 // q22.2      |
| 208348_s_at  | <i>CBLB</i>              | 3.931326  | 1.975016  | 3.931326 up  | chr3:105399842-105587887 (-) // 99.58 // q13.11    |
| 222620_s_at  | <i>DNAJC1</i>            | 3.9271865 | 1.9734961 | 3.9271865 up | chr10:22045476-22292633 (-) // 92.63 // p12.31     |
| 211089_s_at  | <i>NEK3</i>              | 3.9195354 | 1.9706826 | 3.9195354 up | chr13:52725280-52728104 (-) // 91.81 // q14.3      |
| 243092_at    | <i>PAN3-AS1</i>          | 3.910352  | 1.9672985 | 3.910352 up  | chr13:28710878-28711523 (-) // 63.1 // q12.2       |
| 1553498_at   |                          | 3.9041498 | 1.9650084 | 3.9041498 up | chr6:20452064-20452657 (+) // 3.02 // p22.3        |
| 202853_s_at  | <i>RYK</i>               | 3.901041  | 1.9638592 | 3.901041 up  | chr3:133875977-133969590 (-) // 89.84 // q22.2     |
| 242903_at    | <i>IFNGR1</i>            | 3.8960369 | 1.9620073 | 3.8960369 up | chr6:137523127-137523703 (-) // 96.58 // q23.3     |
| 228249_at    | <i>C11orf74</i>          | 3.8923955 | 1.9606583 | 3.8923955 up | chr11:36616056-36680822 (+) // 86.91 // p12        |
| 238869_at    |                          | 3.8915465 | 1.9603436 | 3.8915465 up | chr14:62179099-62180011 (+) // 29.93 // q23.2      |
| 1552623_at   | <i>HSH2D</i>             | 3.8911557 | 1.9601988 | 3.8911557 up | chr19:16254474-16269351 (+) // 72.7 // p13.12      |
|              |                          |           |           |              | chr2:112229526-112230294 (+) // 69.08 //           |
| 236595_at    |                          | 3.8869073 | 1.9586227 | 3.8869073 up | q13///chr2:87777016-87777788 (-) // 69.72 // p11.2 |
| 1556238_at   |                          | 3.884798  | 1.9578396 | 3.884798 up  | chr7:35728667-35730281 (-) // 91.95 // p14.2       |
| 235142_at    | <i>ZBTB8A</i>            | 3.8845553 | 1.9577495 | 3.8845553 up | chr1:33059150-33066654 (+) // 98.75 // p35.1       |
| 1554980_a_at | <i>ATF3</i>              | 3.8838592 | 1.9574909 | 3.8838592 up | chr1:212788363-212792897 (+) // 95.57 // q32.3     |
| 222303_at    |                          | 3.8797338 | 1.9559577 | 3.8797338 up | chr21:40182385-40183124 (+) // 85.21 // q22.2      |
| 229155_at    |                          | 3.8735175 | 1.9536443 | 3.8735175 up | chr10:106063569-106064708 (+) // 77.6 // q25.1     |
| 209474_s_at  | <i>ENTPD1</i>            | 3.8650022 | 1.9504693 | 3.8650022 up | chr10:97515966-97626282 (+) // 100.0 // q24.1      |
| 214446_at    | <i>ELL2</i>              | 3.8605363 | 1.9488013 | 3.8605363 up | chr5:95224518-95297486 (-) // 98.09 // q15         |
| 231109_at    |                          | 3.8458176 | 1.9432904 | 3.8458176 up | chr10:11237660-11237997 (+) // 91.41 // p14        |
| 203710_at    | <i>ITPR1</i>             | 3.845347  | 1.9431138 | 3.845347 up  | chr3:4535135-4889081 (+) // 99.77 // p26.1         |
| 217606_at    | <i>AC009303.2///OTTH</i> | 3.842576  | 1.9420738 | 3.842576 up  | chr2:118771788-118773249 (+) // 74.83 // q14.1     |
| 214172_x_at  | <i>RYK</i>               | 3.839278  | 1.940835  | 3.839278 up  | chr3:133875792-133969586 (-) // 90.7 // q22.2      |
| 229623_at    |                          | 3.834547  | 1.9390562 | 3.834547 up  | chr4:83403975-83404959 (-) // 57.14 // q21.22      |
| 241860_at    | <i>LOC100996866</i>      | 3.8341465 | 1.9389055 | 3.8341465 up |                                                    |
| 202241_at    | <i>TRIB1</i>             | 3.8314786 | 1.9379013 | 3.8314786 up | chr8:126442871-126450643 (+) // 94.33 // q24.13    |
| 221105_at    |                          | 3.8261364 | 1.9358883 | 3.8261364 up | chr8:134537860-134540252 (+) // 48.06 // q24.22    |
| 214657_s_at  | <i>MIR612///NEAT1</i>    | 3.8250136 | 1.9354649 | 3.8250136 up | chr11:65190998-65192453 (+) // 96.04 // q13.1      |



|              |           |           |              |              |
|--------------|-----------|-----------|--------------|--------------|
| 236423_at    | 3.823188  | 1.9347762 | 3.823188 up  |              |
| 241916_at    | 3.8212285 | 1.9340365 | 3.8212285 up |              |
| 221861_at    | ARRB1     | 3.8041885 | 1.9275887    | 3.8041885 up |
| 1556812_a_at | 3.804001  | 1.9275177 | 3.804001 up  |              |
| 223218_s_at  | NFKBIZ    | 3.8021169 | 1.9268029    | 3.8021169 up |
| 227297_at    | ITGA9     | 3.795032  | 1.9241121    | 3.795032 up  |
| 215284_at    | 3.7941978 | 1.9237949 | 3.7941978 up |              |
| 203821_at    | HBEGF     | 3.792155  | 1.923018     | 3.792155 up  |
| 232304_at    | PELI1     | 3.7890987 | 1.9218547    | 3.7890987 up |
| 225009_at    | CMTM4     | 3.7850833 | 1.920325     | 3.7850833 up |
| 235641_at    | TRIB1     | 3.7790568 | 1.9180262    | 3.7790568 up |
| 232522_at    | 3.7770495 | 1.9172597 | 3.7770495 up |              |
| 216190_x_at  | ITGB1     | 3.776661  | 1.9171113    | 3.776661 up  |

|              |               |           |              |              |
|--------------|---------------|-----------|--------------|--------------|
| 239715_at    | 3.7741725     | 1.9161603 | 3.7741725 up |              |
| 1558740_s_at | 3.7725809     | 1.9155518 | 3.7725809 up |              |
| 230825_at    | 3.763904      | 1.9122299 | 3.763904 up  |              |
| 226691_at    | TNRC18        | 3.7630515 | 1.911903     | 3.7630515 up |
| 234255_at    | 3.7578225     | 1.909897  | 3.7578225 up |              |
| 229422_at    | NRD1          | 3.750311  | 1.9070102    | 3.750311 up  |
| 234989_at    | MIR612//NEAT1 | 3.7417514 | 1.9037137    | 3.7417514 up |
| 225913_at    | PEAK1         | 3.7370381 | 1.9018953    | 3.7370381 up |

chr3:146256492-146257226 (-) // 28.17 // q24  
chr11:74971168-74973510 (-) // 84.93 // q13.4  
chr2:197961283-197961876 (-) // 91.04 // q33.1  
chr3:101568424-101579865 (+) // 90.49 // q12.3  
chr3:37862525-37864996 (+) // 95.53 // p22.2  
chr6:158273056-158274823 (+) // 23.48 // q25.3  
chr5:139712428-139726174 (-) // 94.03 // q31.3  
chr2:64331834-64333714 (-) // 86.92 // p14  
chr16:66648653-66652270 (-) // 98.2 // q21  
chr8:126445856-126446498 (-) // 99.38 // q24.13  
chr10:114843460-114846520 (+) // 64.65 // q25.2  
chr10:33190474-33197373 (+) // 90.44 // p11.22  
chrY:28673690-28674139 (+) // 65.36 //  
q11.23///chr13:20054531-20054979 (-) // 65.14 //  
q12.11///chr21:10957658-10958107 (-) // 50.54 //  
p11.1///chr22:38763903-38764352 (-) // 36.38 // q13.1  
chr12:12634500-12636900 (+) // 62.69 // p13.2  
chr6:89799044-89799727 (-) // 74.71 // q15  
chr7:5346425-5360822 (-) // 93.72 // p22.1  
chr5:130708922-130710231 (-) // 28.11 // q31.1  
chr1:52302636-52303622 (-) // 87.11 // p32.3  
chr11:65199206-65200407 (+) // 35.11 // q13.1  
chr15:77400505-77402248 (-) // 96.95 // q24.3

|            |                         |           |           |              |
|------------|-------------------------|-----------|-----------|--------------|
| 215921_at  | <i>NPIPB3</i>           | 3.7363706 | 1.9016376 | 3.7363706 up |
| 242794_at  | <i>MAML3</i>            | 3.7337816 | 1.9006375 | 3.7337816 up |
| 222094_at  | <i>LOC101060714//LO</i> | 3.7279103 | 1.8983672 | 3.7279103 up |
| 209710_at  | <i>GATA2</i>            | 3.7009168 | 1.8878827 | 3.7009168 up |
| 244726_at  |                         | 3.6877704 | 1.8827488 | 3.6877704 up |
| 225342_at  | <i>AK4//LOC10050785</i> | 3.6865025 | 1.8822527 | 3.6865025 up |
| 218750_at  | <i>TAF1D</i>            | 3.68464   | 1.8815236 | 3.68464 up   |
| 203650_at  | <i>PROCR</i>            | 3.6831715 | 1.8809485 | 3.6831715 up |
| 235922_at  |                         | 3.6822553 | 1.8805896 | 3.6822553 up |
| 222621_at  | <i>DNAJC1</i>           | 3.6822426 | 1.8805847 | 3.6822426 up |
| 1562865_at | <i>OTTHUMG00000164</i>  | 3.6769676 | 1.8785164 | 3.6769676 up |
| 214866_at  | <i>PLAUR</i>            | 3.6742795 | 1.8774613 | 3.6742795 up |
| 226130_at  | <i>RPS16</i>            | 3.6728454 | 1.8768982 | 3.6728454 up |
| 203574_at  | <i>NFIL3</i>            | 3.664997  | 1.8738121 | 3.664997 up  |
| 225056_at  | <i>SIPA1L2</i>          | 3.6647325 | 1.8737079 | 3.6647325 up |
| 238895_at  |                         | 3.663606  | 1.8732643 | 3.663606 up  |

chr16:28655910-28669004 (+) // 89.08 //  
p11.2///chr16:28770024-28783129 (+) // 89.08 //  
p11.2///chr16:29049975-29063048 (+) // 88.94 //  
p11.2///chr16:74411871-74424944 (+) // 88.81 //  
q23.1///chr16:22538886-22544602 (+) // 83.51 //  
p12.2///chr16:28468691-28481759 (-) // 89.21 //  
p11.2///chr16:28354853-28367922 (-) // 89.15 //  
p11.2///chr16:29395954-29401669 (-) // 83.79 //  
p11.2///chr16:29497498-29503195 (-) // 83.72 //  
p11.2///chr16:21416958-21422662 (-) // 83.58 //  
p12.2///chr16:30237468-30243168 (-) // 83.58 //  
p11.2///chr16:21849409-21855114 (-) // 83.51 //  
p12.2///chr16:12022080-12027780 (-) // 82.84 // p13.13  
chr4:140637908-140638417 (-) // 87.62 // q31.1  
chr16:29468627-29469538 (+) // 86.18 //  
p11.2///chr16:30207969-30208880 (+) // 86.18 // p11.2  
chr3:128198269-128206765 (-) // 98.09 // q21.3  
chr20:8355977-8356611 (+) // 44.12 // p12.3  
chr1:65695094-65697828 (+) // 90.98 // p31.3  
chr11:93463368-93474660 (-) // 97.65 // q21  
chr20:33759933-33765159 (+) // 96.42 // q11.22  
chr19:16189765-16190538 (+) // 81.0 // p13.12  
chr10:22045476-22292633 (-) // 92.63 // p12.31  
chr8:141601782-141603294 (+) // 56.83 // q24.3  
chr19:44150427-44174318 (-) // 75.93 // q13.31  
chr19:39923776-39925018 (-) // 91.59 // q13.2  
chr9:94171328-94185962 (-) // 98.7 // q22.31  
chr1:232533714-232650489 (-) // 98.35 // q42.2  
chr12:57077796-57078797 (-) // 91.3 // q13.3

|              |                           |           |           |           |    |
|--------------|---------------------------|-----------|-----------|-----------|----|
| 215920_s_at  | <i>NPIP3</i> ///PDXDC2P   | 3.6575007 | 1.8708582 | 3.6575007 | up |
| 235213_at    | <i>ITPKB</i>              | 3.655139  | 1.8699262 | 3.655139  | up |
| 241938_at    | <i>QKI</i>                | 3.646202  | 1.8663945 | 3.646202  | up |
| 232307_at    |                           | 3.6432936 | 1.8652433 | 3.6432936 | up |
| 219999_at    | <i>MAN2A2</i>             | 3.643222  | 1.865215  | 3.643222  | up |
| 1558739_at   |                           | 3.6404545 | 1.8641186 | 3.6404545 | up |
| 229437_at    | <i>MIR155</i> ///MIR155HG | 3.6377645 | 1.8630521 | 3.6377645 | up |
| 1569854_at   |                           | 3.6358051 | 1.8622749 | 3.6358051 | up |
| 1554443_s_at | <i>BEST1</i>              | 3.6340063 | 1.861561  | 3.6340063 | up |
| 224082_at    |                           | 3.6328573 | 1.8611047 | 3.6328573 | up |
| 220814_at    |                           | 3.630283  | 1.860082  | 3.630283  | up |
| 214445_at    | <i>ELL2</i>               | 3.6266477 | 1.8586366 | 3.6266477 | up |
| 237856_at    | <i>RAP1GDS1</i>           | 3.626418  | 1.8585453 | 3.626418  | up |
| 1559889_at   |                           | 3.623611  | 1.8574281 | 3.623611  | up |
| 239923_at    |                           | 3.617287  | 1.854908  | 3.617287  | up |
| 219938_s_at  | <i>PSTPIP2</i>            | 3.6162097 | 1.8544784 | 3.6162097 | up |
| 1554319_at   | <i>RPS6KA5</i>            | 3.6019258 | 1.8487685 | 3.6019258 | up |
| 1569487_at   |                           | 3.6006892 | 1.848273  | 3.6006892 | up |
| 201505_at    | <i>LAMB1</i>              | 3.5981004 | 1.8472354 | 3.5981004 | up |
| 223380_s_at  | <i>LATS2</i>              | 3.5951772 | 1.8460629 | 3.5951772 | up |
| 234731_at    |                           | 3.5928507 | 1.845129  | 3.5928507 | up |

chr16:28655910-28669004 (+) // 89.08 //  
 p11.2///chr16:28770024-28783129 (+) // 89.08 //  
 p11.2///chr16:29049975-29063048 (+) // 88.94 //  
 p11.2///chr16:74411871-74424944 (+) // 88.81 //  
 q23.1///chr16:22538886-22544602 (+) // 83.51 //  
 p12.2///chr16:28468691-28481759 (-) // 89.21 //  
 p11.2///chr16:28354853-28367922 (-) // 89.15 //  
 p11.2///chr16:29395954-29401669 (-) // 83.79 //  
 p11.2///chr16:29497498-29503195 (-) // 83.72 //  
 p11.2///chr16:21416958-21422662 (-) // 83.58 //  
 p12.2///chr16:30237468-30243168 (-) // 83.58 //  
 p11.2///chr16:21849409-21855114 (-) // 83.51 //  
 p12.2///chr16:12022080-12027780 (-) // 82.84 // p13.13  
 chr1:226914399-226915714 (-) // 99.54 // q42.12  
 chr6:163837316-163838100 (+) // 98.99 // q26  
 chr12:116598576-116600425 (-) // 43.67 // q24.21  
 chr15:91464918-91465807 (+) // 28.39 // q26.1  
 chr12:12634500-12636900 (+) // 62.69 // p13.2  
 chr21:26946212-26947477 (+) // 82.24 // q21.3  
 chr6:163894451-163895032 (+) // 5.32 // q26  
 chr11:61717841-61731518 (+) // 91.33 // q12.3  
 chr16:81508262-81508970 (+) // 75.32 // q23.2  
 chr12:65022251-65022941 (+) // 13.19 // q14.2  
 chr5:95224518-95297486 (+) // 98.09 // q15  
 chr4:99317609-99318057 (+) // 98.46 // q23  
 chr1:120909356-120910251 (+) // 95.81 //  
 p11.2///chr1:149394978-149395875 (-) // 96.24 //  
 q21.2///chr1:149779980-149780875 (-) // 95.16 // q21.2  
 chr6:108896100-108896581 (+) // 96.57 // q21  
 chr18:43563502-43585499 (-) // 75.76 // q21.1  
 chr14:91360318-91526950 (-) // 95.46 // q32.11  
 chr4:1741077-1743830 (+) // 79.91 // p16.3  
 chr7:107564262-107643804 (-) // 99.91 // q31.1  
 chr13:21548578-21635654 (-) // 97.73 // q12.11  
 chr15:20565429-20567049 (-) // 55.26 // q11.1

|             |                 |           |           |              |                                                        |
|-------------|-----------------|-----------|-----------|--------------|--------------------------------------------------------|
| 236438_at   |                 | 3.5917716 | 1.8446956 | 3.5917716 up | chr7:66210125-66219735 (+) // 53.21 // q11.21          |
| 1556209_at  | <i>CLEC2B</i>   | 3.5901828 | 1.8440573 | 3.5901828 up |                                                        |
| 239780_at   |                 | 3.5901315 | 1.8440367 | 3.5901315 up | chr1:10358721-10359143 (+) // 32.4 // p36.22           |
| 202481_at   | <i>DHRS3</i>    | 3.5899546 | 1.8439656 | 3.5899546 up | chr1:12627939-12677406 (-) // 98.0 // p36.22           |
| 1560460_at  |                 | 3.5794985 | 1.8397574 | 3.5794985 up | chr4:174289045-174290966 (-) // 25.05 // q34.1         |
| 206960_at   | <i>LPAR4</i>    | 3.5781138 | 1.8391993 | 3.5781138 up | chrX:78010300-78012588 (+) // 98.61 // q21.1           |
| 1563392_at  |                 | 3.5757322 | 1.8382387 | 3.5757322 up | chr21:39770903-39771325 (-) // 96.54 // q22.2          |
| 213116_at   | <i>NEK3</i>     | 3.573675  | 1.8374084 | 3.573675 up  | chr13:52706782-52728284 (-) // 89.86 // q14.3          |
| 225564_at   | <i>SPATA13</i>  | 3.568139  | 1.8351718 | 3.568139 up  | chr13:24879163-24881207 (+) // 98.79 // q12.12         |
| 232188_at   | <i>AKAP13</i>   | 3.5681136 | 1.8351616 | 3.5681136 up | chr15:86227459-86230332 (+) // 65.05 // q25.3          |
| 239371_at   |                 | 3.5570889 | 1.8306971 | 3.5570889 up | chr17:80536826-80537613 (+) // 96.21 // q25.3          |
| 207426_s_at | <i>TNFSF4</i>   | 3.553401  | 1.8292005 | 3.553401 up  | chr1:173152873-173176351 (-) // 82.87 // q25.1         |
| 230315_at   |                 | 3.553324  | 1.8291693 | 3.553324 up  | chr4:38666649-38667210 (-) // 99.29 // p14             |
| 214929_s_at | <i>KIAA1109</i> | 3.5492823 | 1.8275273 | 3.5492823 up | chr4:123176013-123246921 (+) // 99.32 // q27           |
| 231897_at   | <i>PTGR1</i>    | 3.5464058 | 1.8263576 | 3.5464058 up | chr9:114325248-114361687 (-) // 97.15 // q31.3         |
| 240538_at   |                 | 3.5418406 | 1.8244992 | 3.5418406 up | chr8:6560990-6561550 (-) // 51.24 // p23.1             |
| 232876_at   |                 | 3.5395215 | 1.8235543 | 3.5395215 up | chr6:36079053-36081120 (+) // 72.35 // p21.31          |
| 227405_s_at | <i>FZD8</i>     | 3.5381675 | 1.8230023 | 3.5381675 up | chr10:35927536-35928379 (-) // 86.53 // p11.21         |
| 223454_at   | <i>CXCL16</i>   | 3.538003  | 1.8229352 | 3.538003 up  | chr17:4636835-4642735 (-) // 73.72 // p13.2            |
| 228220_at   | <i>FCHO2</i>    | 3.5362906 | 1.8222369 | 3.5362906 up | chr5:72385838-72386349 (+) // 95.34 // q13.2           |
|             |                 |           |           |              | chr1:120910664-120912800 (+) // 10.63 //               |
|             |                 |           |           |              | p11.2///chr1:149392422-149394565 (-) // 15.2 //        |
| 1555967_at  |                 | 3.5267093 | 1.8183227 | 3.5267093 up | q21.2///chr1:149777429-149779567 (-) // 11.23 // q21.2 |
| 1554714_at  | <i>RELL1</i>    | 3.5241911 | 1.8172922 | 3.5241911 up | chr4:37592331-37687998 (-) // 89.49 // p14             |
| 205878_at   | <i>POU6F1</i>   | 3.5213602 | 1.8161328 | 3.5213602 up | chr12:51582944-51590818 (-) // 99.73 // q13.13         |
| 235975_at   | <i>MTO1</i>     | 3.5189345 | 1.8151387 | 3.5189345 up | chr6:74218300-74218958 (+) // 95.41 // q13             |
| 204446_s_at | <i>ALOX5</i>    | 3.515915  | 1.8139001 | 3.515915 up  | chr10:45869685-45941561 (+) // 96.56 // q11.21         |
| 219821_s_at | <i>GFOD1</i>    | 3.504266  | 1.8091123 | 3.504266 up  | chr6:13363818-13487787 (-) // 97.69 // p24.1           |
| 237411_at   | <i>ADAMTS6</i>  | 3.4996264 | 1.8072009 | 3.4996264 up | chr5:64444565-64444941 (-) // 97.66 // q12.3           |
| 211553_x_at | <i>APAF1</i>    | 3.497938  | 1.8065047 | 3.497938 up  | chr12:99042137-99043352 (+) // 99.28 // q23.1          |
| 233989_at   |                 | 3.4966624 | 1.8059785 | 3.4966624 up | chr21:26940342-26941443 (-) // 93.33 // q21.3          |
| 227481_at   | <i>CNKSR3</i>   | 3.4930675 | 1.8044945 | 3.4930675 up | chr6:154726322-154727312 (-) // 97.31 // q25.2         |
| 229696_at   | <i>FECH</i>     | 3.4919593 | 1.8040367 | 3.4919593 up | chr18:55212073-55213244 (-) // 75.91 // q21.31         |
| 227404_s_at | <i>EGR1</i>     | 3.489884  | 1.803179  | 3.489884 up  | chr5:137803735-137804994 (-) // 98.97 // q31.2         |
| 238243_at   |                 | 3.489627  | 1.8030728 | 3.489627 up  | chr5:86688421-86688891 (+) // 97.51 // q14.3           |
| 208886_at   | <i>H1FO</i>     | 3.4891958 | 1.8028946 | 3.4891958 up | chr22:38201254-38203436 (+) // 96.07 // q13.1          |

|              |                   |           |           |           |    |                                                        |
|--------------|-------------------|-----------|-----------|-----------|----|--------------------------------------------------------|
| 1554615_at   | OTTHUMG00000169   | 3.4812875 | 1.799621  | 3.4812875 | up | chr12:104945590-104947218 (+) // 32.91 // q23.3        |
| 206301_at    | TEC               | 3.4756281 | 1.7972738 | 3.4756281 | up | chr4:48137800-48230678 (-) // 96.52 // p12             |
| 241071_at    |                   | 3.4743152 | 1.7967286 | 3.4743152 | up | chr1:8517295-8517712 (+) // 79.57 // p36.23            |
| 211066_x_at  | PCDHGA1///PCDHG   | 3.4739268 | 1.7965673 | 3.4739268 | up | chr5:140855568-140892538 (+) // 99.23 // q31.3         |
| 225163_at    | FRMD4A            | 3.4696794 | 1.7948023 | 3.4696794 | up | chr10:13685705-14372883 (-) // 98.26 // p13            |
| 241954_at    | FDFT1             | 3.4678297 | 1.794033  | 3.4678297 | up | chr8:11692688-11693662 (+) // 69.55 // p23.1           |
| 1555326_a_at | ADAM9             | 3.4651356 | 1.7929118 | 3.4651356 | up | chr8:38854549-38961235 (+) // 100.0 // p11.22          |
| 1558534_at   | LOC100271836///LO | 3.4638548 | 1.7923784 | 3.4638548 | up | chr16:21483650-21923026 (-) // 87.28 // p12.2          |
| 1562368_at   | CARD11            | 3.4610367 | 1.7912042 | 3.4610367 | up | chr7:3080567-3083579 (-) // 60.88 // p22.2             |
| 226001_at    | KLHL5             | 3.4585767 | 1.7901784 | 3.4585767 | up | chr4:39064545-39124043 (+) // 94.21 // p14             |
| 238883_at    |                   | 3.4559195 | 1.7890697 | 3.4559195 | up | chr12:116663867-116664366 (-) // 78.44 // q24.21       |
| 237949_at    |                   | 3.4497085 | 1.7864745 | 3.4497085 | up | chr12:116485203-116485682 (-) // 99.58 // q24.21       |
| 1564776_at   |                   | 3.4477594 | 1.7856591 | 3.4477594 | up | chr3:18450185-18451127 (-) // 95.73 // p24.3           |
| 210928_at    |                   | 3.4443305 | 1.7842236 | 3.4443305 | up | chr12:70715460-70718054 (-) // 63.67 // q15            |
| 227565_at    | KLHL5             | 3.4429305 | 1.783637  | 3.4429305 | up | chr4:39127137-39127851 (+) // 52.89 // p14             |
| 244035_at    | OTTHUMG00000180   | 3.439845  | 1.7823436 | 3.439845  | up | chr18:60981038-60981475 (-) // 93.06 // q21.33         |
| 220560_at    | C11orf21          | 3.4397986 | 1.7823241 | 3.4397986 | up | chr11:2317377-2323290 (-) // 58.44 // p15.5            |
| 229543_at    | OTTHUMG00000159   | 3.435808  | 1.7806494 | 3.435808  | up | chr6:116782532-116784961 (-) // 99.83 // q22.1         |
| 239674_at    |                   | 3.4347312 | 1.7801973 | 3.4347312 | up | chr6:157347791-157348257 (+) // 72.16 // q25.3         |
| 238082_at    |                   | 3.4344678 | 1.7800865 | 3.4344678 | up | chr8:38790876-38791296 (+) // 56.39 // p11.22          |
| 239759_at    |                   | 3.433432  | 1.7796514 | 3.433432  | up | chr1:150545017-150546236 (+) // 84.31 // q21.3         |
| 243505_at    | MAP3K3            | 3.4325716 | 1.7792898 | 3.4325716 | up | chr17:61750138-61750757 (+) // 59.39 // q23.3          |
| 230127_at    | OTTHUMG00000184   | 3.4310799 | 1.7786627 | 3.4310799 | up | chrX:45604639-45605121 (-) // 95.63 // p11.3           |
| 223596_at    | SLC12A6           | 3.430621  | 1.7784697 | 3.430621  | up | chr15:34525462-34629045 (-) // 99.32 // q14            |
| 232189_at    | OTTHUMG00000180   | 3.428328  | 1.7775052 | 3.428328  | up | chr18:56418725-56421708 (+) // 63.14 // q21.32         |
|              |                   |           |           |           |    | chr16:29398878-29746914 (+) // 35.04 //                |
|              |                   |           |           |           |    | p11.2///chr18:11623192-11824686 (+) // 34.91 //        |
|              |                   |           |           |           |    | p11.21///chr16:74346681-74422013 (-) // 33.66 // q23.1 |
| 222145_at    |                   | 3.4280357 | 1.7773821 | 3.4280357 | up | chr10:73507315-73533277 (-) // 87.4 // q22.1           |
| 225372_at    | C10orf54          | 3.425189  | 1.7761836 | 3.425189  | up | chr5:86676620-86678864 (+) // 67.03 // q14.3           |
| 232344_at    |                   | 3.4205658 | 1.774235  | 3.4205658 | up |                                                        |
| 235786_at    |                   | 3.4125354 | 1.770844  | 3.4125354 | up |                                                        |
| 227567_at    | LINC00674         | 3.4112437 | 1.7702978 | 3.4112437 | up | chr17:66110559-66122027 (+) // 96.15 // q24.2          |
| 236338_at    |                   | 3.4044087 | 1.7674042 | 3.4044087 | up | chr13:110432007-110432471 (-) // 100.0 // q34          |
| 237032_x_at  | SIPA1L1           | 3.4040053 | 1.7672333 | 3.4040053 | up | chr14:72041327-72041809 (+) // 98.77 // q24.2          |
| 234492_at    |                   | 3.4023178 | 1.7665179 | 3.4023178 | up |                                                        |
| 239358_at    |                   | 3.4016051 | 1.7662157 | 3.4016051 | up | chr8:11688349-11688814 (+) // 98.5 // p23.1            |

|             |                 |           |           |           |    |                                                 |
|-------------|-----------------|-----------|-----------|-----------|----|-------------------------------------------------|
| 231437_at   | <i>SLC35D2</i>  | 3.399339  | 1.7652543 | 3.399339  | up | chr9:99112643-99113069 (-) // 68.13 // q22.32   |
| 212959_s_at | <i>GNPTAB</i>   | 3.3906875 | 1.7615778 | 3.3906875 | up | chr12:102139274-102158566 (-) // 79.93 // q23.2 |
| 229257_at   | <i>TNRC18</i>   | 3.3887253 | 1.7607427 | 3.3887253 | up | chr7:5390921-5391351 (-) // 94.71 // p22.1      |
| 211794_at   | <i>FYB</i>      | 3.3868704 | 1.7599528 | 3.3868704 | up | chr5:39108331-39203062 (-) // 94.7 // p13.1     |
| 226071_at   | <i>ADAMTSL4</i> | 3.3830264 | 1.7583144 | 3.3830264 | up | chr1:150529673-150533408 (+) // 98.6 // q21.3   |
| 240128_at   |                 | 3.380115  | 1.7570723 | 3.380115  | up | chr7:33100007-33100465 (-) // 73.05 // p14.3    |
| 243808_at   |                 | 3.379272  | 1.7567124 | 3.379272  | up | chr7:92284340-92284772 (-) // 51.71 // q21.2    |
| 212779_at   | <i>KIAA1109</i> | 3.3733659 | 1.7541888 | 3.3733659 | up | chr4:123207802-123283907 (+) // 98.64 // q27    |
| 239555_at   |                 | 3.3707726 | 1.7530793 | 3.3707726 | up | chr8:56831282-56831581 (+) // 28.57 // q12.1    |
| 226390_at   | <i>STARD4</i>   | 3.3699021 | 1.7527066 | 3.3699021 | up | chr5:110831730-110833317 (-) // 78.57 // q22.1  |
| 202068_s_at | <i>LDLR</i>     | 3.369802  | 1.7526639 | 3.369802  | up | chr19:11200131-11244490 (+) // 84.99 // p13.2   |
| 220008_at   | <i>PEAK1</i>    | 3.3686771 | 1.7521821 | 3.3686771 | up | chr15:77405132-77407654 (-) // 99.1 // q24.3    |
| 230529_at   | <i>HECA</i>     | 3.362799  | 1.7496625 | 3.362799  | up | chr6:139456779-139457389 (+) // 97.87 // q24.1  |
| 237891_at   | <i>MDM2</i>     | 3.3576689 | 1.74746   | 3.3576689 | up | chr12:69218010-69218537 (+) // 92.49 // q15     |
| 244356_at   |                 | 3.356425  | 1.7469255 | 3.356425  | up | chr7:77191569-77192275 (+) // 85.26 // q11.23   |
| 232835_at   |                 | 3.3515582 | 1.744832  | 3.3515582 | up | chr6:15262649-15265601 (+) // 62.66 // p22.3    |
| 1557305_at  | <i>TACC1</i>    | 3.3487387 | 1.7436178 | 3.3487387 | up | chr8:38703416-38705639 (+) // 69.77 // p11.22   |
| 236168_at   |                 | 3.342838  | 1.7410735 | 3.342838  | up | chr2:223792818-223793380 (+) // 56.34 // q36.1  |
| 206009_at   | <i>ITGA9</i>    | 3.340178  | 1.739925  | 3.340178  | up | chr3:37493812-37860937 (+) // 99.41 // p22.2    |
| 215874_at   |                 | 3.3398643 | 1.7397895 | 3.3398643 | up | chr8:134507178-134509435 (-) // 59.28 // q24.22 |
| 226377_at   | <i>NFIC</i>     | 3.3397198 | 1.739727  | 3.3397198 | up | chr19:3467826-3469215 (+) // 85.82 // p13.3     |
| 204774_at   | <i>EVI2A</i>    | 3.3388164 | 1.7393367 | 3.3388164 | up | chr17:29644675-29648709 (-) // 99.74 // q11.2   |
| 1560770_at  | <i>PABPC1</i>   | 3.3372498 | 1.7386596 | 3.3372498 | up | chr8:101727579-101730066 (-) // 63.36 // q22.3  |
| 243720_at   |                 | 3.3361166 | 1.7381697 | 3.3361166 | up | chr16:81734390-81734724 (+) // 65.37 // q23.3   |
| 204588_s_at | <i>SLC7A7</i>   | 3.3354197 | 1.7378683 | 3.3354197 | up | chr14:23242433-23288958 (-) // 98.04 // q11.2   |
| 204863_s_at | <i>IL6ST</i>    | 3.3311799 | 1.7360332 | 3.3311799 | up | chr5:55235751-55290772 (-) // 95.76 // q11.2    |
| 241924_at   | <i>MECP2</i>    | 3.330143  | 1.7355841 | 3.330143  | up | chrX:153353204-153353922 (-) // 88.66 // q28    |
| 1557343_at  |                 | 3.326865  | 1.7341633 | 3.326865  | up | chr12:12631806-12632529 (+) // 70.4 // p13.2    |
| 1562611_at  |                 | 3.3256738 | 1.7336466 | 3.3256738 | up | chr15:86277125-86279269 (-) // 85.34 // q25.3   |
| 244727_at   | <i>KCNQ1OT1</i> | 3.3255847 | 1.733608  | 3.3255847 | up | chr11:2717136-2717696 (-) // 18.34 // p15.5     |
| 218346_s_at | <i>SESN1</i>    | 3.3230336 | 1.7325009 | 3.3230336 | up | chr6:109307646-109415277 (-) // 98.96 // q21    |
| 203857_s_at | <i>PDIA5</i>    | 3.323018  | 1.7324941 | 3.323018  | up | chr3:122785964-122880875 (+) // 98.94 // q21.1  |
| 1566697_at  |                 | 3.320301  | 1.7313141 | 3.320301  | up | chr18:57564502-57566611 (+) // 50.36 // q21.32  |
| 203544_s_at | <i>STAM</i>     | 3.318585  | 1.7305682 | 3.318585  | up | chr10:17686296-17757907 (+) // 98.68 // p12.33  |
| 206474_at   | <i>CDK17</i>    | 3.3158894 | 1.7293959 | 3.3158894 | up | chr12:96673922-96793798 (-) // 96.38 // q23.1   |
| 1554965_at  | <i>FILIP1L</i>  | 3.3128474 | 1.7280717 | 3.3128474 | up | chr3:99551987-99833357 (-) // 98.8 // q12.1     |

|              |                          |           |           |              |                                                  |
|--------------|--------------------------|-----------|-----------|--------------|--------------------------------------------------|
| 242514_at    |                          | 3.3105083 | 1.7270527 | 3.3105083 up | chr7:2803895-2804222 (-) // 63.36 // p22.2       |
| 211044_at    | <i>TRIM14</i>            | 3.306461  | 1.7252879 | 3.306461 up  | chr9:100825241-100881488 (-) // 74.75 // q22.33  |
| 224917_at    | <i>MIR21//VMP1</i>       | 3.30211   | 1.7233882 | 3.30211 up   | chr17:57918691-57919727 (+) // 95.07 // q23.1    |
| 222912_at    | <i>ARRB1</i>             | 3.29993   | 1.7224355 | 3.29993 up   | chr11:74976498-75001084 (-) // 95.0 // q13.4     |
| 1563469_at   |                          | 3.2957172 | 1.7205925 | 3.2957172 up | chr10:63836873-63843071 (+) // 84.78 // q21.2    |
| 1560063_a_at | <i>CTD-2540F13.2//OT</i> | 3.2941577 | 1.7199097 | 3.2941577 up | chr19:39228923-39230497 (+) // 40.31 // q13.2    |
| 1569596_at   |                          | 3.293689  | 1.7197044 | 3.293689 up  |                                                  |
| 233227_at    | <i>KIAA1109</i>          | 3.2924383 | 1.7191564 | 3.2924383 up | chr4:123128388-123148902 (-) // 96.82 // q27     |
| 225093_at    | <i>UTRN</i>              | 3.2906961 | 1.7183928 | 3.2906961 up | chr6:145161912-145174168 (+) // 99.3 // q24.2    |
| 213262_at    | <i>SACS</i>              | 3.2899148 | 1.7180502 | 3.2899148 up | chr13:23902968-23915840 (-) // 98.8 // q12.12    |
| 207477_at    |                          | 3.2871883 | 1.7168541 | 3.2871883 up | chr2:15636730-15638485 (+) // 32.69 // p24.3     |
| 239379_at    |                          | 3.2855198 | 1.7161217 | 3.2855198 up | chr2:238651062-238651667 (+) // 97.27 // q37.3   |
| 240262_at    |                          | 3.2817416 | 1.7144617 | 3.2817416 up | chr5:138133147-138133574 (+) // 91.9 // q31.2    |
| 226741_at    | <i>SLC12A6</i>           | 3.281014  | 1.7141417 | 3.281014 up  | chr15:34519891-34525006 (-) // 84.98 // q14      |
| 1558747_at   | <i>SMCHD1</i>            | 3.280085  | 1.7137332 | 3.280085 up  | chr18:2655885-2697868 (+) // 99.71 // p11.32     |
| 238403_at    |                          | 3.2769542 | 1.7123555 | 3.2769542 up | chr11:78029280-78029432 (-) // 66.09 // q14.1    |
| 1561882_at   | <i>SYTL3</i>             | 3.2761    | 1.7119794 | 3.2761 up    | chr6:159115997-159117049 (+) // 15.16 // q25.3   |
| 1557763_at   | <i>LPAR6</i>             | 3.2728474 | 1.7105464 | 3.2728474 up | chr13:48963706-49013949 (-) // 59.38 // q14.2    |
| 207986_x_at  | <i>CYB561</i>            | 3.2721088 | 1.7102207 | 3.2721088 up | chr17:61510513-61515320 (-) // 81.99 // q23.3    |
| 243981_at    | <i>STK4</i>              | 3.2653737 | 1.7072481 | 3.2653737 up | chr20:43615920-43616399 (+) // 76.28 // q13.12   |
| 242117_at    |                          | 3.2652695 | 1.7072021 | 3.2652695 up | chr17:61758010-61758779 (-) // 55.07 // q23.3    |
| 229390_at    | <i>FAM26F</i>            | 3.2567637 | 1.703439  | 3.2567637 up | chr6:116782532-116784946 (+) // 97.23 // q22.1   |
| 236322_at    |                          | 3.2509968 | 1.7008822 | 3.2509968 up | chr5:158623254-158623882 (-) // 78.54 // q33.3   |
| 217649_at    | <i>ZFAND5</i>            | 3.2502873 | 1.7005672 | 3.2502873 up | chr9:74971749-74972392 (-) // 92.54 // q21.13    |
| 224916_at    | <i>TMEM173</i>           | 3.2496736 | 1.7002949 | 3.2496736 up | chr5:138855112-138862343 (-) // 77.08 // q31.2   |
| 208187_s_at  |                          | 3.2447457 | 1.6981055 | 3.2447457 up | chr5:137881628-137882992 (-) // 38.92 // q31.2   |
| 216528_at    |                          | 3.2445107 | 1.6980009 | 3.2445107 up |                                                  |
| 237187_at    | <i>HRK</i>               | 3.2416203 | 1.6967151 | 3.2416203 up | chr12:117297456-117297924 (-) // 96.88 // q24.22 |
| 235461_at    | <i>TET2</i>              | 3.2413423 | 1.6965914 | 3.2413423 up | chr4:106156398-106157650 (+) // 95.55 // q24     |
| 233927_at    |                          | 3.237405  | 1.6948379 | 3.237405 up  | chr13:41631311-41632787 (+) // 59.54 // q14.11   |
| 218847_at    | <i>IGF2BP2</i>           | 3.235168  | 1.6938406 | 3.235168 up  | chr3:185361774-185542812 (-) // 86.64 // q27.2   |
| 235094_at    |                          | 3.233     | 1.6928735 | 3.233 up     | chr19:16189175-16189669 (+) // 95.96 // p13.12   |
| 234649_at    |                          | 3.231847  | 1.692359  | 3.231847 up  | chr1:167260233-167261719 (+) // 76.77 // q24.2   |

|              |                   |           |           |              |
|--------------|-------------------|-----------|-----------|--------------|
| 81737_at     | LOC100505915      | 3.2307556 | 1.6918716 | 3.2307556 up |
| 204689_at    | HHEX              | 3.2273304 | 1.6903414 | 3.2273304 up |
| 242290_at    | TACC1             | 3.2267818 | 1.690096  | 3.2267818 up |
| 235464_at    | CTB-89H12.4//OTTf | 3.2249947 | 1.6892967 | 3.2249947 up |
| 205349_at    | GNA15             | 3.2144632 | 1.6845778 | 3.2144632 up |
| 214964_at    |                   | 3.208089  | 1.6817142 | 3.208089 up  |
| 1554999_at   | RASGEF1B          | 3.202351  | 1.6791315 | 3.202351 up  |
| 1556239_a_at |                   | 3.199795  | 1.6779795 | 3.199795 up  |
| 1552378_s_at | RDH10             | 3.1995232 | 1.6778569 | 3.1995232 up |
| 242218_at    | LOC100507672      | 3.1993349 | 1.677772  | 3.1993349 up |
| 236919_at    |                   | 3.198057  | 1.6771957 | 3.198057 up  |
| 1570183_at   | FBXO34            | 3.1943252 | 1.6755112 | 3.1943252 up |
| 1562957_at   |                   | 3.1923966 | 1.6746399 | 3.1923966 up |
| 1562031_at   | JAK2              | 3.192079  | 1.6744964 | 3.192079 up  |
| 227624_at    | TET2              | 3.1916375 | 1.6742969 | 3.1916375 up |
| 238412_at    | RRN3P3            | 3.1884067 | 1.6728357 | 3.1884067 up |

chr16:21420400-21420976 (+) // 22.8 //  
 p12.2///chr16:29500934-29501510 (+) // 22.8 //  
 p11.2///chr16:30240904-30241480 (+) // 22.8 //  
 p11.2///chr16:29399396-29399969 (+) // 22.8 //  
 p11.2///chr16:12025511-12026085 (+) // 22.8 //  
 p13.13///chr16:18456232-18456806 (+) // 22.8 //  
 p12.3///chr16:28358309-28358885 (+) // 22.8 //  
 p11.2///chr16:15461716-15462287 (+) // 22.8 //  
 p13.11///chr16:18416080-18416656 (+) // 22.8 //  
 p12.3///chr16:15202393-15202962 (+) // 22.8 //  
 p13.11///chr16:21852852-21853419 (+) // 22.8 //  
 p12.2///chr18:11623710-11624277 (+) // 22.8 //  
 p11.21///chr16:22540590-22541160 (-) // 22.8 //  
 p12.2///chr16:28664972-28665548 (-) // 22.8 //  
 p11.2///chr16:28779097-28779671 (-) // 22.8 //  
 p11.2///chr16:14854494-14855069 (-) // 22.8 //  
 p13.11///chr16:14815378-14815949 (-) // 22.8 //  
 p13.11///chr16:29059014-29059583 (-) // 22.8 //  
 p11.2///chr16:16439594-16440161 (-) // 22.8 //  
 p13.11///chr16:16482956-16483524 (-) // 22.8 // p13.11  
 chr10:94449717-94455388 (+) // 92.41 // q23.33  
 chr8:38696801-38697636 (+) // 96.67 // p11.22  
 chr5:148876503-148877690 (-) // 75.78 // q32  
 chr19:3136229-3163741 (+) // 99.9 // p13.3  
 chr7:5365381-5368071 (-) // 34.38 // p22.1  
 chr4:82372047-82393044 (-) // 63.1 // q21.21  
 chr7:35728667-35730281 (-) // 91.95 // p14.2  
 chr8:74207264-74236571 (+) // 86.32 // q21.11  
 chr6:35310401-35324635 (+) // 58.15 // p21.31  
 chr18:43808671-43809190 (+) // 74.61 // q21.1  
 chr14:55754315-55755746 (+) // 46.61 // q22.3  
  
 chr9:5065804-5068158 (+) // 78.23 // p24.1  
 chr4:106164725-106200958 (+) // 95.21 // q24  
 chr16:22430835-22431335 (-) // 65.16 // p12.2



|             |                           |           |           |           |    |                                                 |
|-------------|---------------------------|-----------|-----------|-----------|----|-------------------------------------------------|
| 1570080_at  | <i>OTTHUMG00000011</i>    | 3.1831498 | 1.6704551 | 3.1831498 | up | chr1:114466623-114471882 (-) // 56.52 // p13.2  |
| 244152_at   | <i>IQCJ-SCHIP1-AS1///</i> | 3.1818984 | 1.6698878 | 3.1818984 | up | chr3:159483171-159486383 (-) // 92.11 // q25.33 |
| 237561_x_at |                           | 3.1792173 | 1.6686716 | 3.1792173 | up | chr19:16193045-16193822 (+) // 21.74 // p13.12  |
| 1569522_at  |                           | 3.177203  | 1.6677573 | 3.177203  | up | chr16:29606389-29607445 (+) // 80.11 // p11.2   |
| 233325_at   | <i>SLC35D2</i>            | 3.1760428 | 1.6672304 | 3.1760428 | up | chr9:99075726-99083596 (-) // 19.87 // q22.32   |
| 243959_at   |                           | 3.1752007 | 1.6668478 | 3.1752007 | up | chr7:131114594-131115221 (+) // 79.62 // q32.3  |
| 226640_at   | <i>DAGLB</i>              | 3.173516  | 1.6660821 | 3.173516  | up | chr7:6448759-6449535 (-) // 94.51 // p22.1      |
| 236207_at   | <i>SSFA2</i>              | 3.1718025 | 1.665303  | 3.1718025 | up | chr2:182756922-182766664 (+) // 74.29 // q31.3  |
| 244181_at   |                           | 3.1670008 | 1.6631172 | 3.1670008 | up | chr5:67565270-67565713 (+) // 100.0 // q13.1    |
| 205424_at   | <i>TBKBP1</i>             | 3.1642356 | 1.661857  | 3.1642356 | up | chr17:45772629-45789416 (+) // 93.23 // q21.32  |
| 206359_at   | <i>SOCS3</i>              | 3.1607704 | 1.6602763 | 3.1607704 | up | chr17:76353006-76355282 (-) // 96.97 // q25.3   |
| 213988_s_at | <i>SAT1</i>               | 3.1591556 | 1.659539  | 3.1591556 | up | chrX:23801347-23802157 (+) // 96.97 // p22.11   |
| 211414_at   | <i>GLS</i>                | 3.154747  | 1.6575243 | 3.154747  | up | chr2:191745601-191761294 (+) // 89.2 // q32.2   |
| 224565_at   | <i>MIR612///NEAT1</i>     | 3.153077  | 1.6567603 | 3.153077  | up | chr11:65191943-65194000 (+) // 94.57 // q13.1   |
| 1562439_at  | <i>NCOA3</i>              | 3.1529284 | 1.6566924 | 3.1529284 | up | chr20:46130674-46133200 (+) // 91.86 // q13.12  |
| 236992_at   |                           | 3.1482282 | 1.6545401 | 3.1482282 | up | chr4:37597291-37597768 (+) // 93.66 // p14      |
| 209682_at   | <i>CBLB</i>               | 3.1478057 | 1.6543465 | 3.1478057 | up | chr3:105377114-105587887 (-) // 99.57 // q13.11 |
| 218627_at   | <i>DRAM1</i>              | 3.1474688 | 1.6541921 | 3.1474688 | up | chr12:102295100-102317389 (+) // 83.39 // q23.2 |
| 202804_at   | <i>ABCC1</i>              | 3.1459959 | 1.6535168 | 3.1459959 | up | chr16:16043433-16236914 (+) // 97.01 // p13.11  |
| 237018_at   |                           | 3.1444511 | 1.6528082 | 3.1444511 | up | chr15:86250511-86251032 (+) // 97.75 // q25.3   |
| 223860_at   | <i>PRO1167</i>            | 3.1436827 | 1.6524556 | 3.1436827 | up | chr11:85754649-85756587 (-) // 49.59 // q14.2   |
| 235875_at   |                           | 3.1419325 | 1.6516522 | 3.1419325 | up | chr2:65221286-65221847 (+) // 83.69 // p14      |
| 242726_at   |                           | 3.140982  | 1.6512157 | 3.140982  | up | chr2:223792349-223792817 (+) // 98.73 // q36.1  |
| 239814_at   | <i>LOC100506860</i>       | 3.1384664 | 1.6500597 | 3.1384664 | up | chr7:130606292-130606704 (+) // 83.57 // q32.3  |
| 215635_at   |                           | 3.1335914 | 1.6478171 | 3.1335914 | up | chr15:85526717-85528153 (+) // 77.79 // q25.3   |
| 237180_at   |                           | 3.1301627 | 1.6462376 | 3.1301627 | up | chr2:54196840-54197250 (-) // 98.09 // p16.2    |
| 243335_at   | <i>P4HA1</i>              | 3.1289632 | 1.6456847 | 3.1289632 | up | chr10:74561111-74561243 (-) // 46.98 // q22.1   |
| 229773_at   | <i>SNAP23</i>             | 3.128323  | 1.6453896 | 3.128323  | up | chr15:42813699-42814914 (+) // 94.75 // q15.2   |
| 219450_at   | <i>C4orf19</i>            | 3.1265407 | 1.6445673 | 3.1265407 | up | chr4:37585854-37593434 (+) // 94.21 // p14      |
| 238968_at   |                           | 3.1262152 | 1.644417  | 3.1262152 | up | chr2:196522774-196523636 (-) // 95.91 // q32.3  |
| 237071_at   |                           | 3.125913  | 1.6442776 | 3.125913  | up | chr6:36085740-36086143 (+) // 76.08 // p21.31   |
| 239387_at   |                           | 3.1250203 | 1.6438656 | 3.1250203 | up | chr11:75850599-75851034 (+) // 63.62 // q13.5   |
| 233096_at   | <i>KIAA1109</i>           | 3.1245127 | 1.6436312 | 3.1245127 | up | chr4:123128388-123148902 (+) // 96.82 // q27    |
| 239364_at   |                           | 3.122411  | 1.6426605 | 3.122411  | up | chr12:12045167-12045882 (-) // 98.89 // p13.2   |
| 219693_at   | <i>AGPAT4</i>             | 3.1204226 | 1.6417414 | 3.1204226 | up | chr6:161557106-161695037 (-) // 99.15 // q26    |
| 225611_at   | <i>MAST4</i>              | 3.120342  | 1.6417042 | 3.120342  | up | chr5:66463019-66465908 (+) // 94.5 // q12.3     |

|              |                 |           |           |              |                                                                                      |
|--------------|-----------------|-----------|-----------|--------------|--------------------------------------------------------------------------------------|
| 230179_at    | LOC285812       | 3.1194663 | 1.6412992 | 3.1194663 up | chr6:13358064-13358801 (-) // 98.26 // p24.1<br>chrX:2663762-2664372 (+) // 50.63 // |
| 242051_at    |                 | 3.1174753 | 1.6403781 | 3.1174753 up | p22.33///chrY:2613762-2614372 (+) // 84.49 // p11.31                                 |
| 243522_at    |                 | 3.1152909 | 1.6393669 | 3.1152909 up | chr12:121322310-121322863 (+) // 69.3 // q24.31                                      |
| 235847_at    |                 | 3.113909  | 1.6387268 | 3.113909 up  | chr6:37820715-37821209 (+) // 93.63 // p21.2                                         |
| 243658_at    |                 | 3.1134255 | 1.6385027 | 3.1134255 up | chr8:11662432-11663317 (-) // 27.45 // p23.1                                         |
| 211143_x_at  | NR4A1           | 3.1133778 | 1.6384807 | 3.1133778 up | chr12:52445248-52453285 (+) // 93.63 // q13.13                                       |
| 231343_at    |                 | 3.1128983 | 1.6382585 | 3.1128983 up | chr13:49549096-49549644 (+) // 98.2 // q14.2                                         |
| 209703_x_at  | METTL7A         | 3.1105976 | 1.6371918 | 3.1105976 up | chr12:51318816-51325458 (+) // 56.54 // q13.12                                       |
| 234151_at    |                 | 3.0944788 | 1.6296965 | 3.0944788 up | chr10:11219702-11221244 (+) // 87.46 // p14                                          |
| 227692_at    | GNAI1           | 3.092838  | 1.6289313 | 3.092838 up  | chr7:79847721-79848720 (+) // 92.14 // q21.11                                        |
| 222023_at    | AKAP13          | 3.0912228 | 1.6281776 | 3.0912228 up | chr15:86285225-86287180 (+) // 94.96 // q25.3                                        |
| 208092_s_at  | FAM49A          | 3.08965   | 1.6274434 | 3.08965 up   | chr2:16733900-16805288 (-) // 95.31 // p24.2                                         |
| 243587_x_at  |                 | 3.0887556 | 1.6270257 | 3.0887556 up | chr12:118792744-118793067 (-) // 22.53 // q24.23                                     |
| 233303_at    |                 | 3.0867372 | 1.6260827 | 3.0867372 up | chr4:103727417-103728960 (-) // 99.1 // q24                                          |
| 225140_at    | KLF3            | 3.085565  | 1.6255348 | 3.085565 up  | chr4:38699279-38702663 (+) // 98.68 // p14                                           |
| 1553793_a_at | KIAA1109        | 3.0831208 | 1.6243914 | 3.0831208 up | chr4:123183916-123197340 (+) // 97.04 // q27                                         |
| 225133_at    | KLF3            | 3.0825984 | 1.6241469 | 3.0825984 up | chr4:38699279-38702663 (+) // 98.68 // p14                                           |
| 221831_at    | LUZP1           | 3.0786896 | 1.6223164 | 3.0786896 up | chr1:23410522-23414891 (-) // 84.59 // p36.12                                        |
| 233046_at    |                 | 3.0778067 | 1.6219026 | 3.0778067 up | chr12:7116868-7118142 (-) // 26.07 // p13.31                                         |
| 242815_x_at  |                 | 3.0772681 | 1.6216501 | 3.0772681 up | chr10:13678080-13717989 (+) // 47.19 // p13                                          |
| 236975_at    |                 | 3.0767684 | 1.6214159 | 3.0767684 up | chr13:27739206-27739723 (-) // 83.9 // q12.13                                        |
| 227755_at    | OTTHUMG00000178 | 3.0724692 | 1.6193986 | 3.0724692 up | chr17:62116508-62117484 (-) // 95.01 // q23.3                                        |
| 225930_at    | NKIRAS1         | 3.070512  | 1.6184793 | 3.070512 up  | chr3:23933309-23958452 (-) // 94.16 // p24.2                                         |
| 230048_at    | IFRD1           | 3.070497  | 1.6184722 | 3.070497 up  | chr7:112116793-112117257 (+) // 93.6 // q31.1                                        |
| 229766_at    | ZNF445          | 3.064594  | 1.615696  | 3.064594 up  | chr3:44483133-44483559 (-) // 67.85 // p21.31                                        |
| 242572_at    |                 | 3.0597262 | 1.6134026 | 3.0597262 up | chr4:144274202-144274825 (+) // 98.57 // q31.21                                      |
| 1559159_at   | CEP68           | 3.055295  | 1.6113117 | 3.055295 up  | chr2:65297862-65301618 (+) // 94.02 // p14                                           |
| 233914_s_at  | SBF2            | 3.0550401 | 1.6111913 | 3.0550401 up | chr11:9859605-9861131 (-) // 63.95 // p15.4                                          |
| 220696_at    |                 | 3.0532608 | 1.6103508 | 3.0532608 up | chr17:80479941-80481856 (-) // 39.42 // q25.3                                        |
| 232333_at    |                 | 3.052054  | 1.6097804 | 3.052054 up  | chr11:96011097-96013717 (-) // 65.58 // q21                                          |
| 235680_at    |                 | 3.0510442 | 1.6093031 | 3.0510442 up | chr17:40515649-40516556 (-) // 85.76 // q21.2                                        |
| 235103_at    | MAN2A1          | 3.048909  | 1.608293  | 3.048909 up  | chr5:109203583-109204447 (+) // 97.92 // q21.3                                       |
| 221918_at    | CDK17           | 3.0487406 | 1.6082134 | 3.0487406 up | chr12:96672020-96673090 (-) // 90.51 // q23.1                                        |
| 225613_at    | MAST4           | 3.0469563 | 1.6073688 | 3.0469563 up | chr5:66463019-66465908 (+) // 94.5 // q12.3                                          |
| 236585_at    | OTTHUMG00000184 | 3.0449536 | 1.6064203 | 3.0449536 up | chr7:141362722-141363351 (-) // 98.28 // q34                                         |

|             |                        |           |           |           |    |                                                  |
|-------------|------------------------|-----------|-----------|-----------|----|--------------------------------------------------|
| 226164_x_at | <i>RIMKLB</i>          | 3.0434225 | 1.6056947 | 3.0434225 | up | chr12:8931626-8935689 (+) // 98.39 // p13.31     |
| 209079_x_at | <i>PCDHGA1///PCDHG</i> | 3.0408883 | 1.6044928 | 3.0408883 | up | chr5:140710251-140892546 (+) // 100.0 // q31.3   |
| 202940_at   | <i>WNK1</i>            | 3.0389423 | 1.6035693 | 3.0389423 | up | chr12:989373-1011299 (+) // 97.93 // p13.33      |
| 204881_s_at | <i>UGCG</i>            | 3.0374198 | 1.6028463 | 3.0374198 | up | chr9:114659205-114695431 (+) // 90.65 // q31.3   |
| 243108_at   | <i>RANBP9</i>          | 3.035163  | 1.601774  | 3.035163  | up | chr6:13634191-13634703 (-) // 97.7 // p23        |
| 43511_s_at  | <i>ARRB1</i>           | 3.0349464 | 1.6016711 | 3.0349464 | up | chr11:74971168-74971748 (-) // 89.77 // q13.4    |
| 222913_at   | <i>KLF3</i>            | 3.034007  | 1.6012244 | 3.034007  | up | chr4:38665963-38699508 (+) // 98.79 // p14       |
| 204249_s_at | <i>LMO2</i>            | 3.0326486 | 1.6005783 | 3.0326486 | up | chr11:33880124-33913836 (-) // 97.57 // p13      |
| 216022_at   |                        | 3.0325499 | 1.6005313 | 3.0325499 | up | chr12:982204-983320 (+) // 79.23 // p13.33       |
| 214077_x_at | <i>MEIS3P1</i>         | 3.0298703 | 1.599256  | 3.0298703 | up | chr17:15690387-15692443 (+) // 83.49 // p12      |
| 225630_at   | <i>EEPDI</i>           | 3.0293365 | 1.5990018 | 3.0293365 | up | chr7:36192852-36341146 (+) // 92.1 // p14.2      |
| 239476_at   |                        | 3.0287986 | 1.5987456 | 3.0287986 | up | chr5:67585135-67585587 (+) // 94.36 // q13.1     |
| 209473_at   | <i>ENTPD1</i>          | 3.025828  | 1.59733   | 3.025828  | up | chr10:97582992-97628298 (+) // 86.02 // q24.1    |
| 242937_at   | <i>FOXK2</i>           | 3.024737  | 1.5968096 | 3.024737  | up | chr17:80529435-80530210 (+) // 86.89 // q25.3    |
| 1562673_at  |                        | 3.0189598 | 1.5940515 | 3.0189598 | up | chr14:89809981-89811959 (-) // 65.29 // q32.11   |
| 1561892_at  | <i>ZMYM6</i>           | 3.018323  | 1.5937471 | 3.018323  | up | chr1:35471632-35473193 (+) // 47.41 // p34.3     |
| 236139_at   |                        | 3.0176318 | 1.5934168 | 3.0176318 | up | chr5:6718591-6719457 (+) // 99.77 // p15.31      |
| 238405_at   |                        | 3.0172844 | 1.5932506 | 3.0172844 | up | chr11:78029280-78029432 (+) // 66.09 // q14.1    |
| 1566002_at  |                        | 3.0148933 | 1.5921069 | 3.0148933 | up | chr16:89454712-89456914 (+) // 46.58 // q24.3    |
| 1557477_at  | <i>STIM1</i>           | 3.0141292 | 1.5917412 | 3.0141292 | up | chr11:4000040-4001930 (+) // 70.7 // p15.4       |
| 208219_at   | <i>ACVR1B</i>          | 3.0121417 | 1.5907897 | 3.0121417 | up | chr12:52345485-52381131 (+) // 98.3 // q13.13    |
| 210845_s_at | <i>PLAUR</i>           | 3.01037   | 1.5899408 | 3.01037   | up | chr19:44152731-44174699 (-) // 75.19 // q13.31   |
| 205585_at   | <i>ETV6</i>            | 3.0086958 | 1.5891383 | 3.0086958 | up | chr12:11803037-12044177 (+) // 100.0 // p13.2    |
| 240789_at   |                        | 2.9988353 | 1.5844023 | 2.9988353 | up | chrX:117495156-117495553 (+) // 67.42 // q24     |
| 237673_at   |                        | 2.9984457 | 1.5842149 | 2.9984457 | up | chr13:45128276-45128768 (+) // 37.2 // q14.11    |
| 201945_at   | <i>FURIN</i>           | 2.996608  | 1.5833304 | 2.996608  | up | chr15:91411884-91426687 (+) // 99.9 // q26.1     |
| 202805_s_at | <i>ABCC1</i>           | 2.9939508 | 1.5820506 | 2.9939508 | up | chr16:16043433-16236273 (+) // 97.86 // p13.11   |
| 221752_at   | <i>SSH1</i>            | 2.9874215 | 1.5789008 | 2.9874215 | up | chr12:109176201-109198954 (-) // 92.26 // q24.11 |
| 224967_at   | <i>UGCG</i>            | 2.9872427 | 1.5788145 | 2.9872427 | up | chr9:114695349-114697649 (+) // 93.05 // q31.3   |
| 236889_at   | <i>OTTHUMG00000168</i> | 2.9856775 | 1.5780584 | 2.9856775 | up | chr12:123366752-123367220 (-) // 55.3 // q24.31  |
| 1555645_at  | <i>GAFA2</i>           | 2.9840543 | 1.5772738 | 2.9840543 | up | chr16:81497496-81498464 (-) // 60.43 // q23.2    |
| 234260_at   |                        | 2.981981  | 1.576271  | 2.981981  | up | chr5:130708922-130710221 (+) // 28.11 // q31.1   |
| 239758_at   |                        | 2.978841  | 1.5747511 | 2.978841  | up | chr17:5204290-5205066 (+) // 15.8 // p13.2       |
| 203508_at   | <i>TNFRSF1B</i>        | 2.9751163 | 1.5729461 | 2.9751163 | up | chr1:12227059-12269276 (+) // 86.56 // p36.22    |
| 235056_at   | <i>ETV6</i>            | 2.9696953 | 1.5703149 | 2.9696953 | up | chr12:12045452-12046811 (+) // 75.86 // p13.2    |
| 236931_at   |                        | 2.9693391 | 1.5701419 | 2.9693391 | up | chr11:3901864-3902318 (+) // 96.15 // p15.4      |

|              |                           |           |           |              |                                                       |
|--------------|---------------------------|-----------|-----------|--------------|-------------------------------------------------------|
| 1561015_at   |                           | 2.9689724 | 1.5699637 | 2.9689724 up | chr4:38684730-38685328 (+) // 92.66 // p14            |
| 1553224_at   | <i>LUZP1</i>              | 2.9655738 | 1.5683112 | 2.9655738 up | chr1:23416270-23495338 (-) // 86.34 // p36.12         |
| 240008_at    |                           | 2.9653516 | 1.5682032 | 2.9653516 up | chr6:157223413-157223869 (+) // 76.23 // q25.3        |
|              |                           |           |           |              | chr16:22504092-22505785 (+) // 61.13 //               |
|              |                           |           |           |              | p12.2///chr16:21455759-21457452 (-) // 61.13 //       |
|              |                           |           |           |              | p12.2///chr16:21888021-21889714 (-) // 61.13 //       |
|              |                           |           |           |              | p12.2///chr16:29536243-29537939 (-) // 62.03 //       |
|              |                           |           |           |              | p11.2///chr16:30276227-30277923 (-) // 60.97 //       |
|              |                           |           |           |              | p11.2///chr16:70251128-70252829 (-) // 59.41 //       |
|              |                           |           |           |              | q22.1///chr16:29434501-29436179 (-) // 58.67 // p11.2 |
| 238449_at    | <i>LOC595101</i>          | 2.9649587 | 1.568012  | 2.9649587 up | chr15:65250574-65251033 (+) // 41.26 // q22.31        |
| 229497_at    | <i>ANKDD1A</i>            | 2.9644787 | 1.5677785 | 2.9644787 up | chr22:43199182-43202649 (-) // 64.38 // q13.2         |
| 1566477_at   |                           | 2.9640188 | 1.5675546 | 2.9640188 up | chr16:22385997-22387592 (+) // 62.44 // p12.2         |
| 1569823_at   | <i>LOC440346</i>          | 2.96096   | 1.566065  | 2.96096 up   | chr16:72816783-72820218 (-) // 92.73 // q22.2         |
| 226137_at    | <i>ZFHX3</i>              | 2.9600613 | 1.5656271 | 2.9600613 up | chr14:65858167-65858496 (+) // 14.73 // q23.3         |
| 217695_x_at  |                           | 2.959763  | 1.5654817 | 2.959763 up  | chr12:861893-936663 (+) // 98.55 // p13.33            |
| 1555068_at   | <i>WNK1</i>               | 2.95486   | 1.5630897 | 2.95486 up   | chr3:185633694-185634131 (-) // 74.16 // q27.2        |
| 239447_at    | <i>TRA2B</i>              | 2.9500499 | 1.5607394 | 2.9500499 up | chr5:148877415-148882030 (-) // 84.04 // q32          |
| 1556006_s_at | <i>CTB-89H12.4///OTTH</i> | 2.9499254 | 1.5606785 | 2.9499254 up | chr13:52327487-52328228 (+) // 57.01 // q14.3         |
| 243514_at    |                           | 2.9499133 | 1.5606725 | 2.9499133 up | chr1:154134041-154134714 (-) // 51.6 // q21.3         |
| 238079_at    | <i>TPM3</i>               | 2.94739   | 1.559438  | 2.94739 up   | chr12:12046675-12048339 (+) // 65.2 // p13.2          |
| 225764_at    | <i>ETV6</i>               | 2.9435503 | 1.5575573 | 2.9435503 up | chr5:66409933-66463092 (+) // 98.21 // q12.3          |
| 40016_g_at   | <i>MAST4</i>              | 2.939913  | 1.5557735 | 2.939913 up  | chr9:125133358-125155569 (+) // 99.84 // q33.2        |
| 205128_x_at  | <i>PTGS1</i>              | 2.9379334 | 1.5548017 | 2.9379334 up | chr3:37493605-37671009 (+) // 94.64 // p22.2          |
| 1555336_a_at | <i>ITGA9</i>              | 2.9365363 | 1.5541155 | 2.9365363 up | chr2:197951900-197952349 (+) // 100.0 // q33.1        |
| 237879_at    |                           | 2.936371  | 1.5540344 | 2.936371 up  | chr10:111633590-111634551 (+) // 51.23 // q25.1       |
| 1559350_at   |                           | 2.9362986 | 1.5539987 | 2.9362986 up | chr4:71850260-71853883 (+) // 78.78 // q13.3          |
| 225997_at    | <i>MOB1B</i>              | 2.9344807 | 1.5531052 | 2.9344807 up | chr5:55236836-55290763 (-) // 97.12 // q11.2          |
| 204864_s_at  | <i>IL6ST</i>              | 2.9334712 | 1.5526088 | 2.9334712 up | chr6:7183315-7185801 (+) // 72.8 // p24.3             |
| 215620_at    | <i>RREB1</i>              | 2.9326437 | 1.5522017 | 2.9326437 up |                                                       |
| 1561079_at   | <i>ANKRD28</i>            | 2.920823  | 1.546375  | 2.920823 up  | chr11:13984427-14289430 (+) // 93.85 // p15.2         |
| 209436_at    | <i>SPON1</i>              | 2.9199274 | 1.5459325 | 2.9199274 up | chr18:60985134-60986045 (-) // 92.21 // q21.33        |
| 207004_at    | <i>BCL2</i>               | 2.918493  | 1.5452236 | 2.918493 up  | chr6:167357852-167360151 (-) // 73.51 // q27          |
| 220096_at    |                           | 2.9177692 | 1.5448657 | 2.9177692 up | chr15:88419990-88483987 (+) // 74.13 // q25.3         |
| 216656_at    |                           | 2.917466  | 1.5447158 | 2.917466 up  | chr11:65191943-65194000 (+) // 94.57 // q13.1         |
| 224566_at    | <i>MIR612///NEAT1</i>     | 2.9168813 | 1.5444267 | 2.9168813 up | chr2:32686680-32687107 (+) // 50.11 // p22.3          |
| 242068_at    |                           | 2.9165413 | 1.5442585 | 2.9165413 up |                                                       |

|              |                           |           |           |              |                                                       |
|--------------|---------------------------|-----------|-----------|--------------|-------------------------------------------------------|
| 235745_at    | <i>ERN1</i>               | 2.915807  | 1.5438952 | 2.915807 up  | chr17:62206112-62206848 (-) // 98.39 // q23.3         |
| 204061_at    | <i>PRKX</i>               | 2.9143574 | 1.5431778 | 2.9143574 up | chrX:3522412-3631649 (-) // 82.9 // p22.33            |
|              |                           |           |           |              | chr16:21878903-21879490 (+) // 67.4 //                |
|              |                           |           |           |              | p12.2///chr16:21446632-21447216 (+) // 81.73 //       |
|              |                           |           |           |              | p12.2///chr16:29527097-29527684 (+) // 67.09 //       |
|              |                           |           |           |              | p11.2///chr16:30267084-30267668 (+) // 66.93 //       |
|              |                           |           |           |              | p11.2///chr16:29425315-29425897 (+) // 66.46 //       |
|              |                           |           |           |              | p11.2///chr16:22514329-22514913 (-) // 67.24 // p12.2 |
| 238342_at    |                           | 2.914008  | 1.5430048 | 2.914008 up  | chr10:6245121-6277501 (+) // 96.04 // p15.1           |
| 202464_s_at  | <i>PFKFB3</i>             | 2.9105976 | 1.5413154 | 2.9105976 up | chr6:111802058-111802944 (-) // 97.56 // q21          |
| 238736_at    | <i>REV3L</i>              | 2.909855  | 1.5409472 | 2.909855 up  | chr2:197964193-197986168 (-) // 96.48 // q33.1        |
| 235778_s_at  | <i>ANKRD44</i>            | 2.9078593 | 1.5399575 | 2.9078593 up | chr2:220284857-220291454 (-) // 63.14 // q35          |
| 216947_at    | <i>DES</i>                | 2.9032776 | 1.5376825 | 2.9032776 up | chr6:34584314-34585035 (+) // 100.0 // p21.31         |
| 216588_at    | <i>OTTHUMG00000014</i>    | 2.9025729 | 1.5373323 | 2.9025729 up |                                                       |
| 237556_at    |                           | 2.8974276 | 1.5347726 | 2.8974276 up |                                                       |
| 1567379_at   |                           | 2.8955317 | 1.5338283 | 2.8955317 up | chr10:126467361-126467654 (+) // 47.37 // q26.13      |
| 210943_s_at  | <i>LYST</i>               | 2.8929214 | 1.5325272 | 2.8929214 up | chr1:235954881-236046940 (-) // 99.71 // q42.3        |
| 237232_at    |                           | 2.8927424 | 1.5324378 | 2.8927424 up |                                                       |
| 232610_at    | <i>PARP14</i>             | 2.891646  | 1.5318909 | 2.891646 up  | chr3:122419372-122441494 (+) // 79.45 // q21.1        |
| 239442_at    | <i>CEP68</i>              | 2.8896534 | 1.5308964 | 2.8896534 up | chr2:65301917-65302388 (+) // 43.1 // p14             |
| 1556007_s_at | <i>CTB-89H12.4///OTTH</i> | 2.8781526 | 1.5251431 | 2.8781526 up | chr5:148877415-148882030 (-) // 84.04 // q32          |
| 238114_at    | <i>PCMTD1</i>             | 2.8759522 | 1.5240397 | 2.8759522 up | chr8:52762085-52762535 (-) // 96.57 // q11.23         |
| 1555723_at   |                           | 2.8751485 | 1.5236365 | 2.8751485 up | chr4:170177098-170177643 (-) // 34.22 // q33          |
| 204057_at    | <i>IRF8</i>               | 2.8748188 | 1.523471  | 2.8748188 up | chr16:85936382-85956212 (+) // 91.5 // q24.1          |
| 240318_at    | <i>AFMID</i>              | 2.8745654 | 1.5233438 | 2.8745654 up | chr17:76193224-76193641 (+) // 20.41 // q25.3         |
| 221832_s_at  | <i>LUZP1</i>              | 2.8722675 | 1.5221901 | 2.8722675 up | chr1:23410522-23414891 (-) // 84.59 // p36.12         |
| 243472_at    | <i>AC005355.3///OTTH</i>  | 2.8713315 | 1.5217199 | 2.8713315 up | chr5:133858299-133859627 (-) // 100.0 // q31.1        |
| 231205_at    |                           | 2.8698978 | 1.5209994 | 2.8698978 up | chr8:131329347-131330207 (-) // 73.29 // q24.21       |
| 225637_at    | <i>DEF8</i>               | 2.8694043 | 1.5207512 | 2.8694043 up | chr16:90028480-90034467 (+) // 94.31 // q24.3         |
| 216294_s_at  | <i>KIAA1109</i>           | 2.868308  | 1.5202    | 2.868308 up  | chr4:123260375-123265761 (+) // 92.05 // q27          |
| 236327_at    |                           | 2.8666708 | 1.5193763 | 2.8666708 up | chr1:111710435-111711030 (+) // 50.81 // p13.3        |
| 238413_at    | <i>RRN3P3</i>             | 2.866595  | 1.5193381 | 2.866595 up  | chr16:22430835-22431335 (+) // 65.16 // p12.2         |
| 244560_at    |                           | 2.866559  | 1.51932   | 2.866559 up  | chr2:61175727-61176183 (-) // 97.2 // p16.1           |
| 233369_at    |                           | 2.862441  | 1.517246  | 2.862441 up  | chr14:50642165-50644188 (-) // 35.72 // q21.3         |
| 1567682_x_at | <i>SNORA74A</i>           | 2.8622127 | 1.5171309 | 2.8622127 up | chr5:138614468-138614668 (+) // 100.0 // q31.2        |
| 229629_at    |                           | 2.8607051 | 1.5163708 | 2.8607051 up | chrX:78430233-78430811 (+) // 95.85 // q21.1          |
| 1560080_at   | <i>DIAPH1</i>             | 2.8605494 | 1.5162923 | 2.8605494 up | chr5:140936494-140940612 (-) // 71.93 // q31.3        |

|              |                          |           |           |           |    |                                                       |
|--------------|--------------------------|-----------|-----------|-----------|----|-------------------------------------------------------|
| 210987_x_at  | <i>TPM1</i>              | 2.8600152 | 1.5160228 | 2.8600152 | up | chr15:63334960-63363858 (+) // 84.63 // q22.2         |
| 202381_at    | <i>ADAM9</i>             | 2.8574288 | 1.5147176 | 2.8574288 | up | chr8:38854504-38962520 (+) // 99.3 // p11.22          |
| 225832_s_at  | <i>DAGLB</i>             | 2.8533795 | 1.5126716 | 2.8533795 | up | chr7:6449272-6474487 (-) // 93.79 // p22.1            |
| 226641_at    | <i>ANKRD44</i>           | 2.8527513 | 1.5123539 | 2.8527513 | up | chr2:197851385-197853327 (-) // 93.18 // q33.1        |
| 210405_x_at  | <i>TNFRSF10B</i>         | 2.8509986 | 1.5114673 | 2.8509986 | up | chr8:22879962-22926522 (-) // 98.13 // p21.3          |
| 239614_x_at  |                          | 2.8506043 | 1.5112678 | 2.8506043 | up | chr2:191765893-191766366 (+) // 24.9 // q32.2         |
| 243675_at    |                          | 2.850226  | 1.5110763 | 2.850226  | up | chr4:159795125-159795644 (+) // 14.71 // q32.1        |
| 241365_at    | <i>SATB1</i>             | 2.849414  | 1.5106653 | 2.849414  | up | chr3:18386872-18387678 (-) // 99.14 // p24.3          |
| 243633_at    |                          | 2.848161  | 1.5100307 | 2.848161  | up | chr8:56893307-56894149 (-) // 24.68 // q12.1          |
| 243323_s_at  | <i>ZFHX3</i>             | 2.8458896 | 1.5088797 | 2.8458896 | up | chr16:72820398-72820856 (+) // 93.94 // q22.2         |
|              |                          |           |           |           |    | chr16:29406297-29509383 (+) // 25.36 //               |
| 1558075_at   |                          | 2.844415  | 1.508132  | 2.844415  | up | p11.2///chr16:30247820-30249355 (+) // 25.36 // p11.2 |
| 226895_at    | <i>NFIC</i>              | 2.8442879 | 1.5080675 | 2.8442879 | up | chr19:3463645-3465472 (+) // 65.93 // p13.3           |
| 200677_at    | <i>PTTG1IP</i>           | 2.843193  | 1.5075121 | 2.843193  | up | chr21:46269512-46293741 (-) // 99.85 // q22.3         |
| 232348_at    | <i>C18orf8</i>           | 2.8425918 | 1.5072069 | 2.8425918 | up | chr18:21103366-21107187 (-) // 61.53 // q11.2         |
| 1559452_a_at |                          | 2.8393908 | 1.5055814 | 2.8393908 | up | chr8:134574597-134576865 (-) // 39.12 // q24.22       |
| 243096_at    |                          | 2.8384798 | 1.5051185 | 2.8384798 | up | chr17:8363649-8364007 (+) // 76.1 // p13.1            |
| 243282_at    | <i>CCDC93</i>            | 2.8378081 | 1.5047771 | 2.8378081 | up | chr2:118693611-118694060 (-) // 91.27 // q14.1        |
|              |                          |           |           |           |    | chr2:110551739-110590594 (+) // 87.31 //              |
|              |                          |           |           |           |    | q13///chr2:111296066-111334904 (-) // 87.31 //        |
| 211324_s_at  | <i>RGPD3///RGPD4///R</i> | 2.8377857 | 1.5047656 | 2.8377857 | up | q13///chr2:113150629-113191330 (-) // 87.19 // q13    |
| 49111_at     | <i>ARRB1</i>             | 2.8374474 | 1.5045936 | 2.8374474 | up | chr11:74971166-74972107 (-) // 74.37 // q13.4         |
|              |                          |           |           |           |    | chr16:29502454-29882109 (-) // 61.73 //               |
|              |                          |           |           |           |    | p11.2///chr16:30242427-30246902 (-) // 61.73 //       |
|              |                          |           |           |           |    | p11.2///chr16:21421920-21426408 (-) // 61.73 //       |
| 215002_at    | <i>LOC101060275///LO</i> | 2.8345227 | 1.5031059 | 2.8345227 | up | p12.2///chr16:29400917-29405399 (-) // 61.73 // p11.2 |
| 238171_at    | <i>SLC25A30</i>          | 2.8335083 | 1.5025895 | 2.8335083 | up | chr13:45972016-45975344 (-) // 97.12 // q14.13        |
| 210652_s_at  | <i>TTC39A</i>            | 2.832838  | 1.5022482 | 2.832838  | up | chr1:51752930-51761844 (-) // 91.38 // p32.3          |
| 224724_at    | <i>SULF2</i>             | 2.8295202 | 1.5005574 | 2.8295202 | up | chr20:46285091-46365594 (-) // 99.49 // q13.12        |
| 236114_at    |                          | 2.8292367 | 1.500413  | 2.8292367 | up | chr21:36218495-36218974 (-) // 55.63 // q22.12        |
| 243799_x_at  | <i>ANGPTL3</i>           | 2.8278637 | 1.4997126 | 2.8278637 | up | chr1:63071689-63071989 (+) // 100.0 // p31.3          |
| 233490_at    | <i>DCTN4</i>             | 2.827768  | 1.4996638 | 2.827768  | up | chr5:150088068-150090462 (-) // 88.1 // q33.1         |
| 235107_at    | <i>PIAS2</i>             | 2.826851  | 1.4991958 | 2.826851  | up | chr18:44388789-44389717 (-) // 67.63 // q21.1         |

|             |                   |           |           |           |    |
|-------------|-------------------|-----------|-----------|-----------|----|
| 237464_at   | LOC101060589///SM | 2.8234296 | 1.4974487 | 2.8234296 | up |
| 241289_at   |                   | 2.8220007 | 1.4967184 | 2.8220007 | up |
| 233468_at   |                   | 2.8215516 | 1.4964887 | 2.8215516 | up |
| 226538_at   | MAN2A1            | 2.8204174 | 1.4959087 | 2.8204174 | up |
| 239005_at   |                   | 2.8193145 | 1.4953444 | 2.8193145 | up |
| 220809_at   | OTTHUMG00000176   | 2.8172739 | 1.4942998 | 2.8172739 | up |
| 203642_s_at | COBLL1            | 2.8150513 | 1.4931612 | 2.8150513 | up |
| 214442_s_at | PIAS2             | 2.814207  | 1.4927285 | 2.814207  | up |
| 242738_s_at | ZFHX3             | 2.8101141 | 1.4906287 | 2.8101141 | up |
| 240260_at   |                   | 2.807889  | 1.4894859 | 2.807889  | up |
| 232297_at   | KLHL5             | 2.8077996 | 1.48944   | 2.8077996 | up |
| 201328_at   | ETS2              | 2.8053722 | 1.4881922 | 2.8053722 | up |
| 243797_at   | STK17B            | 2.8051383 | 1.4880719 | 2.8051383 | up |
| 211626_x_at | ERG               | 2.8050516 | 1.4880273 | 2.8050516 | up |
| 1553736_at  | ZFC3H1            | 2.804687  | 1.4878398 | 2.804687  | up |
| 232868_at   | EQTN              | 2.804122  | 1.4875491 | 2.804122  | up |
| 238954_at   |                   | 2.8039157 | 1.487443  | 2.8039157 | up |
| 1556923_at  |                   | 2.8030405 | 1.4869926 | 2.8030405 | up |
| 241092_at   |                   | 2.80256   | 1.4867454 | 2.80256   | up |
| 217200_x_at | CYB561            | 2.8024912 | 1.4867098 | 2.8024912 | up |
| 229483_at   |                   | 2.8010807 | 1.4859836 | 2.8010807 | up |
| 218696_at   | EIF2AK3           | 2.7983801 | 1.484592  | 2.7983801 | up |
| 232540_x_at |                   | 2.7969012 | 1.4838293 | 2.7969012 | up |
| 239745_at   |                   | 2.7937427 | 1.4821992 | 2.7937427 | up |
| 231697_s_at |                   | 2.7925363 | 1.481576  | 2.7925363 | up |
| 244650_at   | FAM105A           | 2.7911713 | 1.4808707 | 2.7911713 | up |
| 233348_at   |                   | 2.7906797 | 1.4806166 | 2.7906797 | up |
| 230380_at   | THAP2             | 2.7905607 | 1.480555  | 2.7905607 | up |
| 223161_at   | KIAA1147          | 2.7904704 | 1.4805083 | 2.7904704 | up |
| 239404_at   |                   | 2.789685  | 1.4801022 | 2.789685  | up |
| 207957_s_at | PRKCB             | 2.7885733 | 1.4795271 | 2.7885733 | up |

chr16:22449214-22450076 (+) // 98.74 //  
p12.2///chr16:21511806-21512668 (-) // 98.74 //  
p12.2///chr16:29604917-29605782 (-) // 98.05 //  
p11.2///chr16:30345005-30345868 (-) // 97.36 // p11.2  
chr4:148599392-148599875 (-) // 50.41 // q31.23  
chr12:62721465-62724366 (-) // 26.08 // q14.1  
chr5:109204151-109205325 (+) // 93.16 // q21.3  
chr1:147902030-147903295 (-) // 46.04 //  
q21.2///chr1:143714521-143715786 (-) // 46.04 // q21.1  
chr16:81601414-81606948 (+) // 58.31 // q23.2  
chr2:165541338-165697922 (-) // 99.36 // q24.3  
chr18:44398172-44497466 (-) // 95.94 // q21.1  
chr16:72820143-72820856 (-) // 91.5 // q22.2  
chr20:49179093-49179643 (+) // 70.47 // q13.13  
chr4:39124003-39125223 (+) // 12.39 // p14  
chr21:40177752-40196876 (+) // 94.13 // q22.2  
chr2:197034890-197035391 (-) // 96.51 // q32.3  
chr21:39753491-39956824 (-) // 97.18 // q22.2  
chr12:72050125-72057638 (-) // 85.7 // q21.1  
chr9:27284665-27297137 (-) // 98.08 // p21.2  
chrX:73484537-73485152 (-) // 69.19 // q13.2  
chr17:73970239-73972463 (-) // 73.79 // q25.1  
chr3:107313120-107313641 (+) // 59.12 // q13.12  
chr17:61510576-61515310 (-) // 84.45 // q23.3  
chr7:129493911-129494647 (-) // 75.47 // q32.2  
chr2:88856349-88926864 (-) // 95.28 // p11.2  
chr16:22433092-22434386 (-) // 23.55 // p12.2  
chr13:28783415-28783967 (+) // 25.99 // q12.2  
chr17:57918708-57919160 (-) // 99.75 //  
q23.1///chr9:94912827-94913283 (-) // 98.25 // q22.31  
chr5:14611467-14612027 (+) // 48.5 // p15.2  
chr6:159032050-159033237 (+) // 30.84 // q25.3  
chr12:72058775-72059211 (+) // 85.81 // q21.1  
chr7:141356529-141365120 (-) // 96.39 // q34  
chr20:39676111-39676780 (+) // 52.32 // q12  
chr16:23847359-24231850 (+) // 95.49 // p12.2

|              |                   |           |           |              |
|--------------|-------------------|-----------|-----------|--------------|
| 215123_at    | LOC613037///NPIPB | 2.788327  | 1.4793998 | 2.788327 up  |
| 206035_at    | REL               | 2.7881892 | 1.4793284 | 2.7881892 up |
| 201029_s_at  | CD99              | 2.7870715 | 1.47875   | 2.7870715 up |
| 234352_x_at  |                   | 2.7870374 | 1.4787323 | 2.7870374 up |
| 210592_s_at  | SAT1              | 2.786911  | 1.4786669 | 2.786911 up  |
| 202032_s_at  | MAN2A2            | 2.7858613 | 1.4781234 | 2.7858613 up |
| 243002_at    |                   | 2.7854578 | 1.4779145 | 2.7854578 up |
| 1558299_at   |                   | 2.7851253 | 1.4777422 | 2.7851253 up |
| 241402_at    | TSEN54            | 2.7850914 | 1.4777247 | 2.7850914 up |
| 1559060_a_at | AC005593.1///OTTH | 2.7822137 | 1.4762332 | 2.7822137 up |
| 1557519_at   |                   | 2.7819636 | 1.4761035 | 2.7819636 up |
| 203116_s_at  | FECH              | 2.7798383 | 1.475001  | 2.7798383 up |
| 233587_s_at  | SIPA1L2           | 2.779205  | 1.4746723 | 2.779205 up  |
| 222116_s_at  | TBC1D16           | 2.7787762 | 1.4744496 | 2.7787762 up |
| 237176_at    |                   | 2.7785726 | 1.4743439 | 2.7785726 up |
| 1556026_at   | LINC00893         | 2.7775548 | 1.4738153 | 2.7775548 up |
| 209294_x_at  | TNFRSF10B         | 2.7770958 | 1.4735769 | 2.7770958 up |
| 212195_at    | IL6ST             | 2.775386  | 1.4726884 | 2.775386 up  |
| 1563076_x_at |                   | 2.7752824 | 1.4726346 | 2.7752824 up |
| 238666_at    |                   | 2.7746432 | 1.4723022 | 2.7746432 up |
| 239393_at    |                   | 2.773933  | 1.4719329 | 2.773933 up  |
| 238257_at    |                   | 2.7724328 | 1.4711525 | 2.7724328 up |
| 204646_at    | DPYD              | 2.7701323 | 1.4699548 | 2.7701323 up |
| 244197_x_at  |                   | 2.7689369 | 1.4693322 | 2.7689369 up |

chr16:22523350-22525827 (+) // 52.46 //  
p12.2///chr16:28647889-28764498 (+) // 49.54 //  
p11.2///chr16:14801030-14803505 (+) // 49.3 //  
p13.11///chr16:14840152-14842627 (+) // 49.3 //  
p13.11///chr16:21435714-21438191 (-) // 49.62 //  
p12.2///chr16:21867994-21870471 (-) // 52.42 //  
p12.2///chr16:30256189-30258661 (-) // 52.74 //  
p11.2///chr16:29516208-29518678 (-) // 52.66 //  
p11.2///chr16:29414418-29416894 (-) // 51.86 //  
p11.2///chr16:70029386-70031862 (-) // 52.18 //  
q22.1///chr16:15474199-15476676 (-) // 52.14 //  
p13.11///chr18:11638759-11641230 (-) // 50.02 // p11.21  
chr2:61108799-61150155 (-) // 85.04 // p16.1  
chrY:2559279-2609274 (+) // 99.19 //  
p11.31///chrX:2609279-2659274 (+) // 99.19 // p22.33  
chr8:42218611-42218832 (-) // 92.91 // p11.21  
chrX:23801463-23804123 (+) // 68.61 // p22.11  
chr15:91446155-91464417 (+) // 93.27 // q26.1  
chr19:7199593-7200044 (-) // 32.47 // p13.2  
chr20:1877983-1879934 (+) // 90.07 // p13  
chr17:73518495-73519049 (+) // 68.77 // q25.1  
chr5:131131137-131132705 (-) // 97.27 // q31.1  
chr5:130700967-130701356 (-) // 85.33 // q31.1  
chr18:55216803-55254057 (-) // 99.59 // q21.31  
chr1:232534209-232581496 (-) // 99.89 // q42.2  
chr17:77909426-77916002 (-) // 85.0 // q25.3  
chr13:46706152-46706581 (-) // 92.65 // q14.13  
chrX:148609133-148610020 (-) // 68.01 // q28  
chr8:22879966-22926554 (-) // 98.88 // p21.3  
chr5:55232473-55236010 (-) // 94.85 // q11.2  
chr7:138736749-138737554 (-) // 17.05 // q34  
chr8:11668033-11668616 (+) // 87.29 // p23.1  
chr13:28848194-28848833 (+) // 87.95 // q12.2  
chr10:22015634-22016029 (-) // 97.52 // p12.31  
chr1:97543301-98386579 (-) // 98.53 // p21.3  
chr12:70677014-70677427 (+) // 52.64 // q15



|             |                 |           |           |           |    |                                                  |
|-------------|-----------------|-----------|-----------|-----------|----|--------------------------------------------------|
| 1558983_at  | <i>LRRC41</i>   | 2.7663648 | 1.4679915 | 2.7663648 | up | chr1:46762151-46766793 (-) // 39.39 // p34.1     |
| 243469_at   |                 | 2.7653284 | 1.4674509 | 2.7653284 | up | chr4:140039838-140040301 (-) // 48.08 // q31.1   |
| 217966_s_at | <i>FAM129A</i>  | 2.764417  | 1.4669752 | 2.764417  | up | chr1:184763051-184943644 (-) // 97.93 // q25.3   |
| 212196_at   | <i>IL6ST</i>    | 2.7644105 | 1.4669719 | 2.7644105 | up | chr5:55232473-55236010 (-) // 94.85 // q11.2     |
| 229391_s_at | <i>FAM26F</i>   | 2.7617052 | 1.4655592 | 2.7617052 | up | chr6:116782532-116784946 (+) // 97.23 // q22.1   |
| 242611_at   |                 | 2.7554758 | 1.4623014 | 2.7554758 | up | chr1:62948880-62949301 (-) // 48.55 // p31.3     |
| 239283_at   | <i>TMED5</i>    | 2.7553189 | 1.4622192 | 2.7553189 | up | chr1:93621097-93621867 (-) // 63.65 // p22.1     |
| 218096_at   | <i>AGPAT5</i>   | 2.7547889 | 1.4619417 | 2.7547889 | up | chr8:6566213-6617184 (+) // 99.01 // p23.1       |
| 232134_at   |                 | 2.7530677 | 1.4610401 | 2.7530677 | up | chr5:6728969-6730951 (+) // 91.52 // p15.31      |
| 233683_at   |                 | 2.7516143 | 1.4602783 | 2.7516143 | up | chr18:33196451-33198554 (+) // 73.63 // q12.2    |
| 227817_at   | <i>PRKCB</i>    | 2.7493343 | 1.4590824 | 2.7493343 | up | chr16:24227376-24229801 (+) // 86.27 // p12.1    |
| 215933_s_at | <i>HHEX</i>     | 2.749065  | 1.458941  | 2.749065  | up | chr10:94451793-94455012 (+) // 85.29 // q23.33   |
| 209683_at   | <i>FAM49A</i>   | 2.7488074 | 1.4588058 | 2.7488074 | up | chr2:16731119-16805288 (-) // 89.02 // p24.2     |
| 222128_at   | <i>NSUN6</i>    | 2.743726  | 1.4561365 | 2.743726  | up | chr10:18828122-18837166 (-) // 56.59 // p12.31   |
| 233473_x_at |                 | 2.7426236 | 1.4555566 | 2.7426236 | up | chr12:62721465-62724366 (+) // 26.08 // q14.1    |
| 240118_at   |                 | 2.7426171 | 1.4555533 | 2.7426171 | up | chr16:11799552-11800125 (-) // 99.65 // p13.13   |
| 235529_x_at | <i>SAMHD1</i>   | 2.7423954 | 1.4554366 | 2.7423954 | up | chr20:35518624-35519171 (-) // 30.38 // q11.23   |
| 209722_s_at | <i>SERPINB9</i> | 2.7394087 | 1.4538646 | 2.7394087 | up | chr6:2890245-2903527 (-) // 100.0 // p25.2       |
| 244397_at   |                 | 2.7393916 | 1.4538555 | 2.7393916 | up | chr8:102219699-102220294 (+) // 49.51 // q22.3   |
| 238025_at   | <i>MLKL</i>     | 2.7388253 | 1.4535573 | 2.7388253 | up | chr16:74705761-74709599 (-) // 56.49 // q23.1    |
| 225828_at   | <i>DAGLB</i>    | 2.7360318 | 1.452085  | 2.7360318 | up | chr7:6449272-6474487 (-) // 93.79 // p22.1       |
| 236535_at   | <i>SMC6</i>     | 2.7351236 | 1.451606  | 2.7351236 | up | chr2:17845078-17845931 (-) // 92.42 // p24.2     |
| 224234_at   |                 | 2.734283  | 1.4511626 | 2.734283  | up | chr4:76407032-76407863 (+) // 53.86 // q21.1     |
| 237422_at   |                 | 2.728184  | 1.447941  | 2.728184  | up | chr2:38535627-38536082 (+) // 35.05 // p22.2     |
| 242612_at   |                 | 2.7279944 | 1.4478407 | 2.7279944 | up | chr17:45698038-45698546 (+) // 48.16 // q21.32   |
| 233694_at   | <i>HSPA1L</i>   | 2.7278998 | 1.4477906 | 2.7278998 | up | chr6:31787740-31789385 (+) // 65.66 // p21.33    |
| 237784_at   | <i>SUB1</i>     | 2.7270186 | 1.4473245 | 2.7270186 | up | chr5:32594835-32595298 (+) // 64.15 // p13.3     |
| 1565689_at  |                 | 2.72463   | 1.4460604 | 2.72463   | up | chr13:50342737-50580129 (-) // 7.91 // q14.2     |
| 234176_at   |                 | 2.7237446 | 1.4455914 | 2.7237446 | up | chr3:28323176-28325054 (-) // 66.92 // p24.1     |
| 238851_at   | <i>ANKRD13A</i> | 2.7233076 | 1.44536   | 2.7233076 | up | chr12:110461668-110462215 (+) // 95.71 // q24.11 |
| 202506_at   | <i>SSFA2</i>    | 2.7223594 | 1.4448576 | 2.7223594 | up | chr2:182783586-182795252 (+) // 97.54 // q31.3   |
| 237062_at   |                 | 2.717642  | 1.4423555 | 2.717642  | up | chr12:121010724-121011209 (-) // 7.72 // q24.31  |
| 239405_at   |                 | 2.716568  | 1.4417851 | 2.716568  | up | chr3:128457014-128457837 (+) // 75.76 // q21.3   |
| 237025_at   |                 | 2.7147093 | 1.4407977 | 2.7147093 | up | chr1:51740411-51740923 (+) // 60.0 // p32.3      |
| 226570_at   | <i>ATP1B3</i>   | 2.711779  | 1.4392396 | 2.711779  | up | chr3:141595607-141632644 (-) // 99.81 // q23     |
| 1553706_at  | <i>HTRA4</i>    | 2.7114425 | 1.4390606 | 2.7114425 | up | chr8:38831696-38846153 (+) // 79.46 // p11.22    |

|              |                    |           |           |              |                                                       |
|--------------|--------------------|-----------|-----------|--------------|-------------------------------------------------------|
| 204093_at    | CCNH               | 2.7114296 | 1.4390537 | 2.7114296 up | chr5:86690091-86708671 (-) // 100.0 // q14.3          |
| 229981_at    | SNX5               | 2.710708  | 1.4386697 | 2.710708 up  | chr20:17922804-17924626 (-) // 63.21 // p11.23        |
| 224733_at    | CMTM3              | 2.7100677 | 1.438329  | 2.7100677 up | chr16:66638347-66647790 (+) // 90.96 // q21           |
| 243338_at    | CTB-89H12.4///OTTI | 2.708383  | 1.4374318 | 2.708383 up  | chr5:148883182-148883632 (-) // 99.78 // q32          |
| 207744_at    |                    | 2.707183  | 1.4367924 | 2.707183 up  | chr5:32149097-32150254 (+) // 28.58 // p13.3          |
| 244335_at    |                    | 2.7050595 | 1.4356604 | 2.7050595 up | chr2:61151557-61152096 (-) // 100.0 // p16.1          |
|              |                    |           |           |              | chr16:21444892-21445979 (-) // 17.02 //               |
|              |                    |           |           |              | p12.2///chr16:29423573-29424653 (-) // 16.58 // p11.2 |
| 235167_at    | LOC100190986///LO  | 2.7040079 | 1.4350994 | 2.7040079 up | chr17:80535898-80536757 (+) // 97.91 // q25.3         |
| 239305_at    | OTTHUMG0000017i    | 2.7024586 | 1.4342725 | 2.7024586 up | chr2:68408741-68409135 (-) // 57.53 // p14            |
| 241786_at    |                    | 2.7014546 | 1.4337364 | 2.7014546 up | chr3:105374307-105375823 (-) // 97.67 // q13.11       |
| 227900_at    | CBLB               | 2.6982076 | 1.4320014 | 2.6982076 up | chr18:2739473-2805012 (+) // 91.02 // p11.32          |
| 212577_at    | SMCHD1             | 2.6971262 | 1.431423  | 2.6971262 up | chr13:52023245-52027475 (-) // 99.35 // q14.3         |
| 1568695_s_at | INTS6              | 2.6928885 | 1.4291545 | 2.6928885 up | chr4:103731527-103732000 (-) // 55.89 // q24          |
| 240383_at    | UBE2D3             | 2.6923358 | 1.4288584 | 2.6923358 up | chr5:32167905-32168365 (-) // 64.13 // p13.3          |
| 236851_x_at  |                    | 2.6916163 | 1.4284728 | 2.6916163 up | chr1:65613858-65694611 (+) // 95.26 // p31.3          |
| 204347_at    | AK4///LOC10050785  | 2.6900413 | 1.4276283 | 2.6900413 up | chr6:116692188-116759440 (+) // 97.62 // q22.1        |
| 218854_at    | DSE                | 2.688536  | 1.4268208 | 2.688536 up  | chr9:99403536-99417473 (-) // 78.46 // q22.33         |
| 227534_at    | AAED1              | 2.6871023 | 1.4260513 | 2.6871023 up | chr3:114033352-114035396 (-) // 77.85 // q13.31       |
| 213158_at    | OTTHUMG0000017i    | 2.6865387 | 1.4257486 | 2.6865387 up | chr5:131746672-131797693 (+) // 26.72 // q31.1        |
| 1564276_at   | C5orf56            | 2.684136  | 1.4244578 | 2.684136 up  | chr18:21739475-21852196 (-) // 98.89 // q11.2         |
| 209485_s_at  | OSBPL1A            | 2.6837337 | 1.4242415 | 2.6837337 up | chr7:6449272-6474487 (-) // 93.79 // p22.1            |
| 225833_at    | DAGLB              | 2.6816092 | 1.423099  | 2.6816092 up | chr18:45404666-45404867 (-) // 48.4 // q21.1          |
| 243895_x_at  | OTTHUMG0000018i    | 2.6811454 | 1.4228494 | 2.6811454 up | chr6:13695657-13696139 (-) // 70.96 // p23            |
| 242143_at    |                    | 2.6806672 | 1.4225922 | 2.6806672 up | chr7:79764161-79847350 (+) // 98.92 // q21.11         |
| 209576_at    | GNAI1              | 2.679392  | 1.4219058 | 2.679392 up  | chr10:73818792-73848767 (-) // 97.61 // q22.1         |
| 202524_s_at  | SPOCK2             | 2.6792767 | 1.4218435 | 2.6792767 up | chr22:28296463-28297355 (-) // 99.44 // q12.1         |
| 242924_at    |                    | 2.6781688 | 1.4212469 | 2.6781688 up | chr11:95754198-95755063 (-) // 26.66 // q21           |
| 1570299_at   |                    | 2.6779354 | 1.4211211 | 2.6779354 up | chr17:67302884-67323290 (+) // 96.08 // q24.3         |
| 241705_at    | ABCA5              | 2.6778169 | 1.4210573 | 2.6778169 up | chr8:42218611-42218832 (+) // 92.91 // p11.21         |
| 234907_x_at  | POLB               | 2.6775706 | 1.4209247 | 2.6775706 up | chr6:109330906-109331329 (+) // 97.92 // q21          |
| 1556287_a_at |                    | 2.6768408 | 1.4205314 | 2.6768408 up | chr3:47729808-47730465 (-) // 65.36 // p21.31         |
| 239238_at    |                    | 2.6748211 | 1.4194424 | 2.6748211 up | chr1:35452584-35456459 (-) // 30.16 // p34.3          |
| 227595_at    | ZMYM6              | 2.6740437 | 1.419023  | 2.6740437 up | chr8:17161327-17162890 (+) // 57.43 // p22            |
| 217259_at    |                    | 2.6730797 | 1.4185029 | 2.6730797 up | chr1:235922474-236047008 (-) // 99.58 // q42.3        |
| 215415_s_at  | LYST               | 2.672778  | 1.41834   | 2.672778 up  | chr10:123587328-123587745 (-) // 95.41 // q26.13      |
| 238252_at    |                    | 2.6726513 | 1.4182717 | 2.6726513 up |                                                       |

|              |                    |           |           |              |                                                       |
|--------------|--------------------|-----------|-----------|--------------|-------------------------------------------------------|
| 217490_at    |                    | 2.6711113 | 1.4174402 | 2.6711113 up | chr16:21526229-21905625 (-) // 1.79 // p12.2          |
| 238873_at    |                    | 2.6696188 | 1.4166337 | 2.6696188 up | chr18:21101275-21102127 (-) // 81.19 // q11.2         |
| 1565690_at   |                    | 2.6686847 | 1.4161289 | 2.6686847 up | chr13:50342737-50580123 (+) // 7.29 // q14.2          |
| 244841_at    | SEC24A             | 2.667239  | 1.4153471 | 2.667239 up  | chr5:134028986-134029387 (+) // 98.04 // q31.1        |
| 244423_at    |                    | 2.6659634 | 1.414657  | 2.6659634 up | chr10:14600597-14601094 (-) // 91.24 // p13           |
| 1565716_at   | FUS                | 2.665938  | 1.4146432 | 2.665938 up  | chr16:31193728-31193985 (+) // 68.18 // p11.2         |
| 203799_at    | CD302///LY75-CD30: | 2.6652033 | 1.4142456 | 2.6652033 up | chr2:160625363-160639981 (-) // 78.61 // q24.2        |
| 242440_at    |                    | 2.6649063 | 1.4140848 | 2.6649063 up | chr11:47534026-47535062 (-) // 75.5 // p11.2          |
| 205223_at    | DEPDC5             | 2.6641455 | 1.4136728 | 2.6641455 up | chr22:32150848-32302997 (+) // 99.3 // q12.2          |
| 238669_at    | PTGS1              | 2.663999  | 1.4135935 | 2.663999 up  | chr9:125157277-125158088 (+) // 23.12 // q33.2        |
| 210365_at    | LOC100506403///RU  | 2.6600165 | 1.4114352 | 2.6600165 up | chr21:36193573-36260987 (-) // 92.58 // q22.12        |
| 202147_s_at  | IFRD1              | 2.6570694 | 1.4098359 | 2.6570694 up | chr7:112090533-112115783 (+) // 95.37 // q31.1        |
| 1558653_at   | MLK7-AS1           | 2.656895  | 1.4097412 | 2.656895 up  | chr2:174062442-174136346 (-) // 77.06 // q31.1        |
| 243046_at    |                    | 2.6561413 | 1.4093319 | 2.6561413 up | chr4:103726644-103727459 (-) // 39.54 // q24          |
| 235106_at    | MAML2              | 2.6554344 | 1.4089478 | 2.6554344 up | chr11:95711403-95724879 (-) // 99.8 // q21            |
| 229987_at    |                    | 2.6533425 | 1.4078109 | 2.6533425 up | chr13:27646240-27647036 (-) // 94.28 // q12.13        |
| 203455_s_at  | SAT1               | 2.6508229 | 1.4064403 | 2.6508229 up | chrX:23801303-23804325 (+) // 97.45 // p22.11         |
| 202146_at    | IFRD1              | 2.6504428 | 1.4062334 | 2.6504428 up | chr7:112090514-112116247 (+) // 95.85 // q31.1        |
| 223162_s_at  | KIAA1147           | 2.6500914 | 1.4060421 | 2.6500914 up | chr7:141356529-141357648 (-) // 98.42 // q34          |
| 224984_at    | NFAT5              | 2.6485376 | 1.4051961 | 2.6485376 up | chr16:69736708-69738557 (+) // 88.91 // q22.1         |
| 209647_s_at  | SOCS5              | 2.6471477 | 1.4044387 | 2.6471477 up | chr2:46926090-46990379 (+) // 98.27 // p21            |
| 234056_at    |                    | 2.6461554 | 1.4038978 | 2.6461554 up | chr13:45958468-45960125 (-) // 15.05 // q14.13        |
| 243450_at    |                    | 2.645743  | 1.4036728 | 2.645743 up  | chr15:86050320-86050615 (+) // 24.75 // q25.3         |
| 239486_at    |                    | 2.6442838 | 1.402877  | 2.6442838 up | chr2:61152082-61152737 (+) // 91.54 // p16.1          |
| 1560332_at   |                    | 2.6436014 | 1.4025047 | 2.6436014 up | chr12:104979152-104983103 (+) // 54.35 // q23.3       |
| 228795_at    | PRKCB              | 2.6430686 | 1.4022138 | 2.6430686 up | chr16:24229899-24230672 (+) // 75.27 // p12.1         |
| 233042_at    |                    | 2.640168  | 1.4006298 | 2.640168 up  | chr12:7116868-7118136 (+) // 25.82 // p13.31          |
| 1565811_at   |                    | 2.6395133 | 1.4002719 | 2.6395133 up | chr2:68423971-68425194 (+) // 16.84 // p14            |
| 1557208_at   | PROSER2-AS1        | 2.638562  | 1.3997519 | 2.638562 up  | chr10:11891607-11936699 (-) // 71.38 // p14           |
|              |                    |           |           |              | chr16:22516691-22517439 (+) // 59.79 //               |
|              |                    |           |           |              | p12.2///chr16:21444106-21444854 (-) // 60.18 //       |
| 235060_at    | LOC100190986///LO  | 2.634311  | 1.3974257 | 2.634311 up  | p12.2///chr16:21876382-21877134 (-) // 60.31 // p12.2 |
| 214989_x_at  |                    | 2.631256  | 1.3957517 | 2.631256 up  | chr12:19410407-19461995 (+) // 80.85 // p12.3         |
| 1568943_at   | INPP5D             | 2.6306248 | 1.3954055 | 2.6306248 up | chr2:233924569-233995358 (+) // 40.58 // q37.1        |
| 1566901_at   | TGIF1              | 2.6297603 | 1.3949313 | 2.6297603 up | chr18:3452604-3453684 (+) // 60.26 // p11.31          |
| 1566987_s_at | LINC00674          | 2.628724  | 1.3943627 | 2.628724 up  | chr17:66121951-66123124 (+) // 94.8 // q24.2          |

|             |                          |           |           |              |
|-------------|--------------------------|-----------|-----------|--------------|
| 241634_at   |                          | 2.628581  | 1.3942842 | 2.628581 up  |
| 238507_at   |                          | 2.6271641 | 1.3935063 | 2.6271641 up |
| 209732_at   | <i>CLEC2B</i>            | 2.6264925 | 1.3931375 | 2.6264925 up |
| 208836_at   | <i>ATP1B3</i>            | 2.6262212 | 1.3929884 | 2.6262212 up |
| 202252_at   | <i>RAB13</i>             | 2.625226  | 1.3924416 | 2.625226 up  |
| 209648_x_at | <i>SOCS5</i>             | 2.6252248 | 1.392441  | 2.6252248 up |
| 215078_at   | <i>LOC100129518///SO</i> | 2.6239674 | 1.3917497 | 2.6239674 up |
| 233931_at   |                          | 2.6193573 | 1.3892128 | 2.6193573 up |
| 227290_at   | <i>OTTHUMG00000176</i>   | 2.6177695 | 1.3883381 | 2.6177695 up |
| 233458_at   | <i>LOC101060521///PO</i> | 2.6102629 | 1.3841951 | 2.6102629 up |
| 230293_at   | <i>MEAF6</i>             | 2.6095655 | 1.3838096 | 2.6095655 up |
| 221718_s_at | <i>AKAP13</i>            | 2.6091197 | 1.3835632 | 2.6091197 up |
| 230582_at   | <i>HECA</i>              | 2.6089828 | 1.3834875 | 2.6089828 up |
| 223966_at   | <i>LOC100128180</i>      | 2.6089246 | 1.3834553 | 2.6089246 up |

|             |                          |           |           |              |
|-------------|--------------------------|-----------|-----------|--------------|
| 204702_s_at | <i>NFE2L3</i>            | 2.608699  | 1.3833306 | 2.608699 up  |
| 215285_s_at | <i>PHTF1</i>             | 2.608552  | 1.3832492 | 2.608552 up  |
| 227805_at   | <i>METAP1D</i>           | 2.6079772 | 1.3829312 | 2.6079772 up |
| 241816_at   |                          | 2.6040685 | 1.3807673 | 2.6040685 up |
| 213516_at   | <i>AKAP13</i>            | 2.6026478 | 1.3799801 | 2.6026478 up |
| 214925_s_at | <i>SPTAN1</i>            | 2.5992095 | 1.378073  | 2.5992095 up |
| 1557394_at  | <i>DLGAP4</i>            | 2.5991163 | 1.3780212 | 2.5991163 up |
| 219694_at   | <i>FAM105A</i>           | 2.5971658 | 1.3769381 | 2.5971658 up |
| 240957_at   |                          | 2.5957494 | 1.3761511 | 2.5957494 up |
| 242407_at   |                          | 2.5923638 | 1.3742682 | 2.5923638 up |
| 1557418_at  | <i>ACSL4</i>             | 2.5901902 | 1.3730581 | 2.5901902 up |
| 202670_at   | <i>MAP2K1</i>            | 2.5880253 | 1.3718517 | 2.5880253 up |
| 239511_s_at | <i>SRSF4</i>             | 2.586281  | 1.370879  | 2.586281 up  |
| 219925_at   | <i>ZMYM6</i>             | 2.5855172 | 1.3704529 | 2.5855172 up |
| 214984_at   | <i>LOC100271836///LO</i> | 2.5854728 | 1.3704281 | 2.5854728 up |
| 212579_at   | <i>SMCHD1</i>            | 2.584962  | 1.370143  | 2.584962 up  |
| 1568448_at  |                          | 2.5849216 | 1.3701205 | 2.5849216 up |
| 236164_at   | <i>FLJ10038</i>          | 2.584857  | 1.3700844 | 2.584857 up  |
| 210448_s_at | <i>P2RX5</i>             | 2.584758  | 1.3700292 | 2.584758 up  |
| 231555_at   |                          | 2.5819182 | 1.3684434 | 2.5819182 up |

chr3:18486728-18505832 (-) // 44.84 // p24.3  
chr2:238952312-238953646 (+) // 87.46 // q37.3  
chr12:10005804-10021952 (-) // 96.79 // p13.31  
chr3:141595615-141645042 (+) // 100.0 // q23  
chr1:153954126-153958828 (-) // 87.48 // q21.3  
chr2:46926098-46989804 (+) // 99.22 // p21  
chr6:160112030-160114276 (-) // 93.22 // q25.3  
chr13:41631311-41632787 (-) // 59.54 // q14.11  
chr16:80631803-80633843 (-) // 98.17 // q23.2  
chr16:22308775-22340412 (+) // 83.77 // p12.2  
chr1:37955564-37956069 (-) // 89.71 // p34.3  
chr15:86123564-86228105 (+) // 99.34 // q25.3  
chr6:139456779-139457389 (-) // 97.87 // q24.1  
chr4:103729628-103730878 (-) // 81.64 // q24  
chr17:45501520-45504005 (+) // 96.41 //  
q21.32///chr18:57636940-57639114 (+) // 96.87 //  
q21.32///chr7:26192508-26225882 (+) // 100.0 // p15.2  
chr1:114248386-114255950 (-) // 97.43 // p13.2  
chr2:172946382-172947158 (+) // 98.48 // q31.1  
chr15:86125012-86287347 (+) // 97.47 // q25.3  
chr9:131355046-131361964 (+) // 79.52 // q34.11  
chr20:35097243-35098978 (+) // 57.73 // q11.23  
chr5:14581931-14611205 (+) // 95.43 // p15.2  
chr10:70894289-70894687 (+) // 18.72 // q22.1  
chr1:8471394-8471751 (-) // 16.9 // p36.23  
chrX:108928339-108930572 (-) // 59.89 // q23  
chr15:66679288-66784758 (+) // 95.18 // q22.31  
chr1:29495748-29496417 (-) // 87.39 // p35.3  
chr1:35449391-35496314 (-) // 99.16 // p34.3  
chr16:21474416-21495855 (-) // 91.6 // p12.2  
chr18:2739473-2805012 (+) // 91.02 // p11.32  
chrX:20189614-20189727 (+) // 92.62 // p22.12  
chr15:50641803-50642601 (-) // 35.21 // q21.2  
chr17:3576523-3599327 (-) // 96.5 // p13.2  
chr12:102153513-102154007 (+) // 97.82 // q23.2

|              |                        |           |              |              |
|--------------|------------------------|-----------|--------------|--------------|
| 214950_at    | 2.5806754              | 1.3677486 | 2.5806754 up |              |
| 244648_at    | 2.576977               | 1.3656796 | 2.576977 up  |              |
| 237488_at    | 2.576748               | 1.3655514 | 2.576748 up  |              |
| 241415_at    | 2.5747046              | 1.364407  | 2.5747046 up |              |
| 209545_s_at  | <i>RIPK2</i>           | 2.574664  | 1.3643843    | 2.574664 up  |
| 237626_at    | 2.5717876              | 1.3627715 | 2.5717876 up |              |
| 225791_at    | <i>UBE2F</i>           | 2.570109  | 1.3618295    | 2.570109 up  |
| 1569578_at   | 2.5680077              | 1.3606496 | 2.5680077 up |              |
| 238961_s_at  | <i>FNDC3A</i>          | 2.5676887 | 1.3604703    | 2.5676887 up |
| 240073_at    | 2.566043               | 1.3595452 | 2.566043 up  |              |
| 242008_at    | 2.565929               | 1.3594812 | 2.565929 up  |              |
| 242134_at    | 2.5658393              | 1.3594308 | 2.5658393 up |              |
| 209544_at    | <i>RIPK2</i>           | 2.5653582 | 1.3591603    | 2.5653582 up |
| 243111_at    | 2.564954               | 1.358933  | 2.564954 up  |              |
| 244474_at    | 2.5645552              | 1.3587086 | 2.5645552 up |              |
| 1566032_at   | 2.5645492              | 1.3587053 | 2.5645492 up |              |
| 1561762_s_at | 2.5600731              | 1.356185  | 2.5600731 up |              |
| 1554565_x_at | <i>SPPL3</i>           | 2.5595443 | 1.355887     | 2.5595443 up |
| 225107_at    | <i>HNRNPA2B1</i>       | 2.5592587 | 1.355726     | 2.5592587 up |
| 1558686_at   | <i>OTTHUMG00000176</i> | 2.5581229 | 1.3550856    | 2.5581229 up |
| 227501_at    | 2.5558887              | 1.353825  | 2.5558887 up |              |
| 227518_at    | <i>SLC35E1</i>         | 2.554256  | 1.3529031    | 2.554256 up  |
| 213353_at    | <i>ABCA5</i>           | 2.5519178 | 1.3515818    | 2.5519178 up |
| 1569676_at   | <i>TOR1AIP2</i>        | 2.5506234 | 1.3508499    | 2.5506234 up |
| 229344_x_at  | <i>RIMKLB</i>          | 2.5494947 | 1.3502114    | 2.5494947 up |
| 238534_at    | <i>LRRFIP1</i>         | 2.5488565 | 1.3498502    | 2.5488565 up |
| 227824_at    | <i>PRKCB</i>           | 2.5468872 | 1.3487351    | 2.5468872 up |
| 238151_at    | 2.546792               | 1.3486811 | 2.546792 up  |              |
| 1568449_at   | 2.5467167              | 1.3486384 | 2.5467167 up |              |
| 204286_s_at  | <i>PMAIP1</i>          | 2.5466268 | 1.3485875    | 2.5466268 up |
| 237396_at    | 2.5462904              | 1.348397  | 2.5462904 up |              |
| 210656_at    | <i>EED</i>             | 2.545806  | 1.3481225    | 2.545806 up  |
| 211087_x_at  | <i>MAPK14</i>          | 2.544947  | 1.3476356    | 2.544947 up  |
| 204285_s_at  | <i>PMAIP1</i>          | 2.5446084 | 1.3474436    | 2.5446084 up |
| 243857_at    | <i>MORF4L2</i>         | 2.54313   | 1.3466052    | 2.54313 up   |

chrX:155227210-155242719 (+) // 60.66 //  
q28///chrY:59330216-59345725 (+) // 60.66 // q12  
chr2:118743758-118744517 (-) // 89.15 // q14.1  
chr14:21725468-21726158 (+) // 35.33 // q11.2

chr8:90770063-90802663 (+) // 98.11 // q21.3  
chr8:53620011-53620425 (-) // 97.41 // q11.23  
chr2:238875684-238951236 (+) // 92.51 // q37.3  
chr16:89471920-89473267 (-) // 68.32 // q24.3  
chr13:49550195-49688869 (-) // 91.9 // q14.2  
chr3:135895584-135896149 (+) // 65.26 // q22.3

chr3:114047983-114048556 (+) // 97.95 // q13.31  
chr8:90770064-90803290 (+) // 98.32 // q21.3  
chr10:97631686-97632810 (-) // 61.44 // q24.1  
chr6:13650410-13650882 (-) // 56.78 // p23  
chr15:90804312-91105865 (+) // 30.64 // q26.1  
chr10:12061056-12061478 (-) // 21.99 // p14  
chr12:121209364-121211407 (-) // 61.53 // q24.31  
chr7:26229269-26231735 (-) // 98.18 // p15.2  
chr16:15506576-15507125 (+) // 65.56 // p13.11  
chr17:25621790-25622614 (+) // 97.15 // q11.1  
chr19:16661666-16662597 (-) // 82.53 // p13.11  
chr17:67242653-67255899 (-) // 95.18 // q24.3  
chr1:179836404-179846917 (-) // 29.07 // q25.2  
chr12:8905991-8935690 (+) // 88.37 // p13.31  
chr2:238626562-238627647 (+) // 81.42 // q37.3  
chr16:24227376-24229801 (+) // 86.27 // p12.1

chrX:20189619-20189727 (-) // 88.52 // p22.12  
chr18:57567236-57571537 (+) // 99.84 // q21.32  
chr11:33372377-33372900 (+) // 82.84 // p13  
chr11:85956181-85989777 (+) // 97.34 // q14.2  
chr6:36043622-36043739 (+) // 66.1 // p21.31  
chr18:57567191-57571537 (+) // 98.22 // q21.32  
chrX:102939352-102939957 (-) // 54.86 // q22.2

|              |                          |           |           |              |                                                      |
|--------------|--------------------------|-----------|-----------|--------------|------------------------------------------------------|
| 244594_x_at  |                          | 2.5426075 | 1.3463088 | 2.5426075 up | chr16:71944551-71944878 (+) // 74.41 // q22.2        |
| 204060_s_at  | <i>PRKX//PRKY</i>        | 2.5419128 | 1.3459145 | 2.5419128 up | chrX:3522412-3631649 (-) // 82.9 // p22.33           |
| 219901_at    | <i>FGD6</i>              | 2.5417924 | 1.3458462 | 2.5417924 up | chr12:95474782-95528604 (-) // 99.62 // q22          |
|              |                          |           |           |              | chr2:110656268-110664027 (+) // 98.23 //             |
|              |                          |           |           |              | q13//chr2:109271493-109279252 (+) // 96.68 //        |
| 223800_s_at  | <i>LIMS3//LIMS3L</i>     | 2.5402215 | 1.3449543 | 2.5402215 up | q12.3//chr2:111222633-111230392 (-) // 98.23 // q13  |
| 239875_at    | <i>NAB1</i>              | 2.5397522 | 1.3446877 | 2.5397522 up | chr2:191514235-191514859 (-) // 99.52 // q32.2       |
| 200911_s_at  | <i>TACC1</i>             | 2.5383582 | 1.3438957 | 2.5383582 up | chr8:38644780-38710545 (+) // 93.97 // p11.22        |
| 208127_s_at  | <i>SOCS5</i>             | 2.5343895 | 1.3416383 | 2.5343895 up | chr2:46926348-46989442 (+) // 98.2 // p21            |
| 211348_s_at  | <i>CDC14B</i>            | 2.532841  | 1.3407565 | 2.532841 up  | chr9:99252522-99382112 (-) // 89.03 // q22.32        |
| 240452_at    | <i>GSPT1</i>             | 2.5305777 | 1.3394668 | 2.5305777 up | chr16:11980878-11981368 (-) // 98.2 // p13.13        |
| 1558600_a_at | <i>CTB-58E17.7//OTTF</i> | 2.5303075 | 1.3393127 | 2.5303075 up | chr17:36952429-36954624 (-) // 88.71 // q12          |
| 1570408_at   |                          | 2.5299785 | 1.3391252 | 2.5299785 up | chr13:99188632-99190507 (-) // 69.42 // q32.2        |
|              |                          |           |           |              | chr16:22514329-22514913 (+) // 67.24 //              |
|              |                          |           |           |              | p12.2//chr16:21878904-21879490 (-) // 67.4 //        |
|              |                          |           |           |              | p12.2//chr16:21446632-21447216 (-) // 81.73 //       |
|              |                          |           |           |              | p12.2//chr16:29527098-29527684 (-) // 67.09 //       |
|              |                          |           |           |              | p11.2//chr16:30267084-30267668 (-) // 66.93 //       |
|              |                          |           |           |              | p11.2//chr16:29425315-29425897 (-) // 66.46 // p11.2 |
| 238341_at    |                          | 2.525699  | 1.3366827 | 2.525699 up  | chr16:81700478-81700877 (+) // 83.74 // q23.3        |
| 238086_at    | <i>LOC100129617</i>      | 2.5248804 | 1.336215  | 2.5248804 up | chr10:74033681-74035793 (+) // 98.86 // q22.1        |
| 202887_s_at  | <i>DDIT4</i>             | 2.5233288 | 1.3353282 | 2.5233288 up | chr2:127415900-127416345 (+) // 97.59 // q14.3       |
| 240671_at    |                          | 2.5227165 | 1.3349781 | 2.5227165 up | chr5:79705334-79706149 (+) // 26.26 // q14.1         |
| 240859_at    | <i>ZFYVE16</i>           | 2.5225368 | 1.3348753 | 2.5225368 up | chr7:77469446-77553449 (+) // 96.32 // q11.23        |
| 1554822_at   | <i>PHTF2</i>             | 2.5215075 | 1.3342866 | 2.5215075 up | chr16:22508768-22509319 (+) // 86.96 //              |
|              |                          |           |           |              | p12.2//chr16:22554235-22554783 (+) // 87.32 //       |
|              |                          |           |           |              | p12.2//chr16:19000446-19000995 (+) // 85.69 //       |
|              |                          |           |           |              | p12.3//chr16:30272663-30273214 (-) // 87.14 //       |
|              |                          |           |           |              | p11.2//chr16:29532681-29533232 (-) // 86.96 //       |
|              |                          |           |           |              | p11.2//chr16:21452225-21452776 (-) // 86.78 //       |
|              |                          |           |           |              | p12.2//chr16:29430885-29431436 (-) // 87.14 //       |
|              |                          |           |           |              | p11.2//chr16:21884493-21885040 (-) // 86.05 // p12.2 |
| 242114_at    | <i>LOC101060424</i>      | 2.519319  | 1.3330338 | 2.519319 up  | chr17:62399862-62407083 (-) // 27.62 // q23.3        |
| 208982_at    | <i>PECAM1</i>            | 2.5185611 | 1.3325998 | 2.5185611 up | chr10:101376348-101379138 (-) // 71.99 // q24.2      |
| 1560705_at   |                          | 2.5158072 | 1.3310213 | 2.5158072 up |                                                      |

|              |                   |           |           |           |    |
|--------------|-------------------|-----------|-----------|-----------|----|
| 210580_x_at  | LOC101060714///SL | 2.5149388 | 1.3305234 | 2.5149388 | up |
| 215908_at    |                   | 2.513932  | 1.3299456 | 2.513932  | up |
| 236471_at    | NFE2L3            | 2.513848  | 1.3298975 | 2.513848  | up |
| 209167_at    | GPM6B             | 2.511133  | 1.3283384 | 2.511133  | up |
| 212812_at    | SERINC5           | 2.509903  | 1.3276316 | 2.509903  | up |
| 243308_at    |                   | 2.5089161 | 1.3270643 | 2.5089161 | up |
| 228362_s_at  | FAM26F            | 2.5085552 | 1.3268567 | 2.5085552 | up |
| 223467_at    | RASD1             | 2.5075977 | 1.3263059 | 2.5075977 | up |
| 215295_at    | DTNB              | 2.5071867 | 1.3260694 | 2.5071867 | up |
| 217263_x_at  | LOC100506403///RU | 2.506687  | 1.3257818 | 2.506687  | up |
| 237968_at    | ATL2              | 2.5056345 | 1.325176  | 2.5056345 | up |
| 238902_at    |                   | 2.5055277 | 1.3251145 | 2.5055277 | up |
| 235540_at    | GNRH1             | 2.5026417 | 1.3234518 | 2.5026417 | up |
| 209184_s_at  | IRS2              | 2.5024762 | 1.3233564 | 2.5024762 | up |
| 230599_at    |                   | 2.5019357 | 1.3230448 | 2.5019357 | up |
| 202912_at    | ADM               | 2.5011358 | 1.3225834 | 2.5011358 | up |
| 227553_at    | PIK3R5            | 2.4988904 | 1.3212876 | 2.4988904 | up |
| 207283_at    | RPL23AP32         | 2.4984803 | 1.3210509 | 2.4984803 | up |
| 238715_at    | LOC646014         | 2.4982784 | 1.3209343 | 2.4982784 | up |
| 212222_at    | PSME4             | 2.4967725 | 1.3200644 | 2.4967725 | up |
| 230363_s_at  | INPP5F            | 2.4941113 | 1.3185259 | 2.4941113 | up |
| 204348_s_at  | AK4///LOC10050785 | 2.4940753 | 1.318505  | 2.4940753 | up |
| 232354_at    | OTTHUMG00000168   | 2.4930632 | 1.3179195 | 2.4930632 | up |
| 242123_at    | PAQR7             | 2.4921072 | 1.3173661 | 2.4921072 | up |
| 1566003_x_at |                   | 2.4905455 | 1.3164618 | 2.4905455 | up |
| 1568977_at   | RNASET2           | 2.488907  | 1.3155124 | 2.488907  | up |
| 241318_at    |                   | 2.4881933 | 1.3150985 | 2.4881933 | up |
| 235457_at    | MAML2             | 2.487873  | 1.3149129 | 2.487873  | up |
| 239512_at    | SRSF4             | 2.4845703 | 1.3129964 | 2.4845703 | up |
| 236545_at    |                   | 2.48365   | 1.3124619 | 2.48365   | up |
| 244220_at    |                   | 2.4828494 | 1.3119967 | 2.4828494 | up |
| 232537_x_at  | MARK3             | 2.4819415 | 1.3114691 | 2.4819415 | up |
| 230494_at    | SLC20A1           | 2.4791296 | 1.3098336 | 2.4791296 | up |

chr16:29471246-29476234 (+) // 80.0 //  
p11.2///chr16:30210588-30215579 (+) // 80.0 // p11.2

chr7:26226311-26226745 (+) // 94.97 // p15.2  
chrX:13789041-13835178 (-) // 96.02 // p22.2  
chr5:79434716-79436445 (-) // 80.52 // q14.1  
chr1:2294484-2295000 (-) // 28.1 // p36.33  
chr6:116783401-116784745 (-) // 98.1 // q22.1  
chr17:17397754-17399640 (-) // 90.52 // p11.2  
chr2:25641562-25875529 (-) // 90.17 // p23.3  
chr21:36228585-36231877 (-) // 73.59 // q22.12  
chr2:38524188-38524656 (-) // 99.57 // p22.2  
chr8:52755066-52755852 (-) // 84.26 // q11.23  
chr8:25281884-25282556 (-) // 84.65 // p21.2  
chr13:110406183-110438915 (-) // 87.73 // q34  
chr8:101283383-101283939 (-) // 83.36 // q22.2  
chr11:10326641-10328923 (+) // 97.1 // p15.4  
chr17:8782232-8782959 (+) // 94.05 // p13.1  
chr2:54754706-54756989 (+) // 79.28 // p16.2  
chr17:62761217-62761742 (-) // 76.07 // q24.1  
chr2:54091205-54197787 (-) // 97.97 // p16.2  
chr10:121551026-121551718 (+) // 96.89 // q26.11  
chr1:65613906-65692698 (+) // 99.0 //  
p31.3///chr17:29672352-29674044 (+) // 97.01 //  
q11.2///chr12:31767865-31769517 (-) // 94.61 // p11.21  
chr12:123370957-123373267 (-) // 57.7 // q24.31  
chr1:26187975-26188380 (-) // 34.69 // p36.11  
chr16:89454712-89456914 (+) // 46.58 // q24.3  
chr6:167365314-167367331 (-) // 49.98 // q27  
chr9:94099266-94099722 (-) // 48.9 // q22.31  
chr11:95709758-95710774 (-) // 98.55 // q21  
chr1:29495748-29496417 (-) // 87.39 // p35.3  
chr4:102262359-102262997 (-) // 66.62 // q24  
chr5:157220236-157220670 (-) // 97.97 // q33.3  
chr14:103913038-103915749 (+) // 53.32 // q32.32  
chr2:113409583-113410242 (+) // 77.54 // q13

|              |                         |           |           |           |    |                                                      |
|--------------|-------------------------|-----------|-----------|-----------|----|------------------------------------------------------|
| 233177_s_at  | <i>PNKD</i>             | 2.4784727 | 1.3094513 | 2.4784727 | up | chr2:219135269-219211512 (+) // 81.85 // q35         |
| 222079_at    | <i>ERG</i>              | 2.47737   | 1.3088094 | 2.47737   | up | chr21:39751948-39752430 (-) // 98.57 // q22.2        |
| 1554564_a_at | <i>SPPL3</i>            | 2.4762645 | 1.3081654 | 2.4762645 | up | chr12:121209364-121211407 (-) // 61.53 // q24.31     |
| 241923_x_at  | <i>NANS</i>             | 2.473331  | 1.3064554 | 2.473331  | up | chr9:100839669-100840051 (-) // 13.18 // q22.33      |
| 226634_at    | <i>METTL10</i>          | 2.4727776 | 1.3061326 | 2.4727776 | up | chr10:126446402-126454158 (-) // 84.47 // q26.13     |
| 213301_x_at  | <i>TRIM24</i>           | 2.4723253 | 1.3058686 | 2.4723253 | up | chr7:138189031-138271154 (+) // 94.35 // q33         |
| 232875_at    |                         | 2.4704301 | 1.3047622 | 2.4704301 | up | chr9:20873841-20875820 (+) // 86.06 // p21.3         |
| 1558120_at   | <i>DDX3X</i>            | 2.4698837 | 1.3044431 | 2.4698837 | up | chrX:41193414-41197878 (+) // 89.33 // p11.4         |
| 244173_at    | <i>MIS18BP1</i>         | 2.4694548 | 1.3041925 | 2.4694548 | up | chr14:45710634-45711264 (-) // 29.24 // q21.2        |
| 211385_x_at  | <i>SULT1A2</i>          | 2.4660504 | 1.3022023 | 2.4660504 | up | chr16:28603264-28608386 (-) // 99.62 // p11.2        |
| 238988_at    |                         | 2.4642828 | 1.3011678 | 2.4642828 | up | chr20:39701403-39702036 (+) // 91.93 // q12          |
| 207122_x_at  | <i>SULT1A2</i>          | 2.463597  | 1.3007663 | 2.463597  | up | chr16:28603265-28608391 (-) // 90.97 // p11.2        |
| 202446_s_at  | <i>PLSCR1</i>           | 2.462948  | 1.3003862 | 2.462948  | up | chr3:146232966-146262518 (-) // 97.78 // q24         |
| 1564192_at   |                         | 2.4629343 | 1.3003781 | 2.4629343 | up | chr10:29835750-29837842 (-) // 98.82 // p11.23       |
| 232865_at    | <i>AFF4</i>             | 2.461963  | 1.2998091 | 2.461963  | up | chr5:132227508-132228812 (-) // 80.06 // q31.1       |
| 243364_at    | <i>AUTS2</i>            | 2.4610007 | 1.2992451 | 2.4610007 | up | chr7:69364394-69755772 (+) // 98.92 // q11.22        |
|              |                         |           |           |           |    | chr16:29454376-29465883 (-) // 92.88 //              |
|              |                         |           |           |           |    | p11.2//chr16:29556141-30205225 (-) // 92.68 // p11.2 |
| 210396_s_at  | <i>BOLA2//LOC101060</i> | 2.4603128 | 1.2988417 | 2.4603128 | up | chr14:89816615-89831650 (+) // 99.12 // q32.11       |
| 1556003_a_at | <i>OTTHUMG00000170</i>  | 2.4586208 | 1.2978493 | 2.4586208 | up | chr6:144612964-145172605 (+) // 99.56 // q24.2       |
| 213023_at    | <i>UTRN</i>             | 2.457786  | 1.2973593 | 2.457786  | up | chr18:20784178-20784626 (+) // 75.11 // q11.2        |
| 239826_at    |                         | 2.4577668 | 1.297348  | 2.4577668 | up | chr15:72854792-72855237 (+) // 97.8 // q24.1         |
| 242431_at    |                         | 2.4565735 | 1.2966474 | 2.4565735 | up | chr6:137518621-137540507 (-) // 99.85 // q23.3       |
| 202727_s_at  | <i>IFNGR1</i>           | 2.4537325 | 1.2949779 | 2.4537325 | up | chr13:97878700-97879319 (+) // 94.13 // q32.1        |
| 236067_at    |                         | 2.453334  | 1.2947437 | 2.453334  | up | chr1:170633413-170705649 (+) // 75.02 // q24.2       |
| 217226_s_at  | <i>SFXN3</i>            | 2.453058  | 1.2945813 | 2.453058  | up | chr1:55537033-55537991 (-) // 98.97 // p32.3         |
| 230004_at    | <i>USP24</i>            | 2.4526374 | 1.2943339 | 2.4526374 | up | chr3:114050913-114053440 (-) // 94.93 // q13.31      |
| 226252_at    |                         | 2.4526336 | 1.2943318 | 2.4526336 | up |                                                      |
| 231147_at    |                         | 2.4500456 | 1.2928085 | 2.4500456 | up |                                                      |
| 226021_at    | <i>RDH10</i>            | 2.4490647 | 1.2922308 | 2.4490647 | up | chr8:74207496-74236793 (+) // 90.99 // q21.11        |
| 1559119_at   |                         | 2.4486036 | 1.2919593 | 2.4486036 | up | chr11:68328750-68329713 (-) // 2.84 // q13.2         |
| 239721_at    |                         | 2.44752   | 1.2913207 | 2.44752   | up | chr7:129488692-129489120 (-) // 99.07 // q32.2       |
| 1554014_at   | <i>CHD2//LOC1005072</i> | 2.4472954 | 1.2911882 | 2.4472954 | up | chr15:93443564-93492460 (+) // 97.36 // q26.1        |
| 203530_s_at  | <i>STX4</i>             | 2.4441464 | 1.2893307 | 2.4441464 | up | chr16:31045067-31051489 (+) // 97.44 // p11.2        |
| 1569091_at   |                         | 2.4432657 | 1.2888107 | 2.4432657 | up | chr13:20553635-20554892 (+) // 32.58 // q12.11       |
| 201858_s_at  | <i>SRGN</i>             | 2.440215  | 1.2870083 | 2.440215  | up | chr10:70847882-70864026 (+) // 99.7 // q22.1         |
| 208707_at    | <i>EIF5</i>             | 2.4394937 | 1.2865818 | 2.4394937 | up | chr14:103800362-103811362 (+) // 90.16 // q32.32     |



|             |                        |           |           |           |    |                                                     |
|-------------|------------------------|-----------|-----------|-----------|----|-----------------------------------------------------|
| 238186_at   |                        | 2.4394388 | 1.2865493 | 2.4394388 | up | chr2:29175354-29176145 (+) // 71.5 // p23.2         |
| 1564795_at  |                        | 2.4370358 | 1.2851274 | 2.4370358 | up | chr11:3766573-3767499 (+) // 56.42 // p15.4         |
| 204722_at   | <i>SCN3B</i>           | 2.4357288 | 1.2843535 | 2.4357288 | up | chr11:123499894-123525312 (-) // 82.09 // q24.1     |
| 1557459_at  |                        | 2.4343493 | 1.2835362 | 2.4343493 | up | chr11:111473612-111477674 (+) // 82.38 // q23.1     |
| 1565915_at  |                        | 2.433597  | 1.2830904 | 2.433597  | up | chr7:138754846-138755429 (+) // 41.86 // q34        |
| 1557512_at  |                        | 2.4305089 | 1.2812583 | 2.4305089 | up | chr12:122824621-122825202 (-) // 50.94 // q24.31    |
| 242870_at   |                        | 2.4295478 | 1.2806878 | 2.4295478 | up | chr12:8930715-8931194 (-) // 100.0 // p13.31        |
| 239266_at   |                        | 2.4288375 | 1.280266  | 2.4288375 | up | chr6:86382986-86383798 (-) // 96.96 // q14.3        |
| 226207_at   | <i>RILPL1</i>          | 2.428805  | 1.2802467 | 2.428805  | up | chr12:123956368-124018000 (-) // 98.23 // q24.31    |
| 232525_at   |                        | 2.4285204 | 1.2800777 | 2.4285204 | up | chr7:127663254-127666069 (+) // 86.44 // q32.1      |
| 1569512_at  |                        | 2.426057  | 1.2786136 | 2.426057  | up | chr10:29936275-29937809 (-) // 89.43 // p11.23      |
| 1556282_at  | <i>FGFR1OP2</i>        | 2.4256635 | 1.2783794 | 2.4256635 | up | chr12:27113207-27113682 (+) // 97.94 // p11.23      |
| 231412_at   | <i>LOC100506342</i>    | 2.425609  | 1.278347  | 2.425609  | up | chr8:90733131-90733552 (-) // 94.17 // q21.3        |
| 231923_at   | <i>TMEM150C</i>        | 2.425335  | 1.2781839 | 2.425335  | up | chr4:83404959-83417303 (-) // 85.32 // q21.22       |
| 232521_at   | <i>PCSK7</i>           | 2.4243126 | 1.2775757 | 2.4243126 | up | chr11:117087178-117089674 (-) // 83.12 // q23.3     |
| 209189_at   | <i>FOS</i>             | 2.4242067 | 1.2775128 | 2.4242067 | up | chr14:75745558-75748651 (+) // 98.3 // q24.3        |
| 1566242_at  |                        | 2.424108  | 1.277454  | 2.424108  | up | chr7:101480047-101481108 (-) // 56.5 // q22.1       |
| 243861_at   | <i>FNIP1</i>           | 2.4207168 | 1.2754343 | 2.4207168 | up | chr5:131051284-131051851 (-) // 75.39 // q31.1      |
| 1557527_at  |                        | 2.4196212 | 1.2747812 | 2.4196212 | up | chr21:36195757-36198497 (-) // 65.16 // q22.12      |
|             |                        |           |           |           |    | chrX:2609401-2658845 (+) // 99.65 //                |
| 201028_s_at | <i>CD99</i>            | 2.4194083 | 1.2746543 | 2.4194083 | up | p22.33//chrY:2559401-2606297 (+) // 95.11 // p11.31 |
| 237184_at   |                        | 2.4175234 | 1.2735299 | 2.4175234 | up | chr12:111980691-111981238 (-) // 96.34 // q24.12    |
| 220974_x_at | <i>SFXN3</i>           | 2.4172332 | 1.2733567 | 2.4172332 | up | chr10:102792168-102800997 (+) // 87.71 // q24.31    |
| 241245_at   | <i>SRSF4</i>           | 2.4162993 | 1.2727993 | 2.4162993 | up | chr1:29495927-29496335 (+) // 100.0 // p35.3        |
| 220578_at   | <i>ADAMTSL4//LOC10</i> | 2.4148688 | 1.2719448 | 2.4148688 | up | chr1:150522413-150524367 (+) // 85.79 // q21.3      |
| 238733_at   |                        | 2.4139638 | 1.271404  | 2.4139638 | up | chr12:69244012-69244725 (+) // 65.38 // q15         |
| 236239_at   | <i>XPNPEP1</i>         | 2.4136684 | 1.2712275 | 2.4136684 | up | chr10:111635975-111636622 (-) // 89.46 // q25.1     |
| 239811_at   |                        | 2.4132092 | 1.2709529 | 2.4132092 | up | chr7:105027749-105028342 (-) // 93.84 // q22.3      |
| 1560926_at  |                        | 2.4123034 | 1.2704114 | 2.4123034 | up | chr3:73097623-73098238 (+) // 82.2 // p13           |
| 226435_at   | <i>PAPLN</i>           | 2.4110599 | 1.2696675 | 2.4110599 | up | chr14:73728757-73741331 (+) // 77.94 // q24.2       |
| 241695_s_at |                        | 2.4110262 | 1.2696474 | 2.4110262 | up | chr3:183212887-183213367 (+) // 76.69 // q27.1      |
| 227539_at   | <i>GNA13</i>           | 2.409699  | 1.268853  | 2.409699  | up | chr17:63005406-63006367 (-) // 95.53 // q24.1       |
| 242467_at   |                        | 2.4093547 | 1.2686468 | 2.4093547 | up | chr5:148896047-148896505 (-) // 90.51 // q32        |
| 1565913_at  |                        | 2.4032104 | 1.2649629 | 2.4032104 | up | chr7:138754846-138755429 (-) // 41.86 // q34        |
| 211000_s_at | <i>IL6ST</i>           | 2.4017432 | 1.2640818 | 2.4017432 | up | chr5:55247291-55272122 (-) // 94.36 // q11.2        |
| 227707_at   | <i>MYLIP</i>           | 2.4011178 | 1.2637062 | 2.4011178 | up | chr6:16129399-16143327 (-) // 99.14 // p22.3        |

|              |                         |           |           |           |    |                                                       |
|--------------|-------------------------|-----------|-----------|-----------|----|-------------------------------------------------------|
| 232146_at    | <i>NDUFC1</i>           | 2.399595  | 1.2627909 | 2.399595  | up | chr4:140221492-140223625 (-) // 99.95 // q31.1        |
| 222662_at    | <i>PPP1R3B</i>          | 2.3970442 | 1.2612565 | 2.3970442 | up | chr8:8993768-9008206 (-) // 88.34 // p23.1            |
| 1568804_at   | <i>AC104134.2//OTTH</i> | 2.3969882 | 1.2612227 | 2.3969882 | up | chr2:88838237-88875135 (+) // 75.31 // p11.2          |
| 220097_s_at  | <i>TMEM104</i>          | 2.3942866 | 1.2595959 | 2.3942866 | up | chr17:72772638-72835889 (+) // 91.69 // q25.1         |
| 200798_x_at  | <i>MCL1</i>             | 2.393381  | 1.2590501 | 2.393381  | up | chr1:150548543-150552055 (-) // 99.01 // q21.3        |
| 225978_at    | <i>RIMKLB</i>           | 2.3931668 | 1.2589209 | 2.3931668 | up | chr12:8850632-8929787 (+) // 98.57 // p13.31          |
| 232125_at    |                         | 2.391794  | 1.2580931 | 2.391794  | up | chr3:114053743-114056098 (-) // 98.73 // q13.31       |
| 234567_at    |                         | 2.3894536 | 1.2566807 | 2.3894536 | up | chr17:70938203-70939929 (+) // 93.25 // q25.1         |
| 239570_at    | <i>RAB1A</i>            | 2.3886893 | 1.2562191 | 2.3886893 | up | chr2:65297834-65298291 (-) // 75.76 // p14            |
| 1554690_a_at | <i>TACC1</i>            | 2.3883734 | 1.2560284 | 2.3883734 | up | chr8:38586157-38705635 (+) // 85.17 // p11.22         |
| 241884_at    |                         | 2.387621  | 1.2555739 | 2.387621  | up | chr7:30505285-30505580 (-) // 96.72 // p14.3          |
| 204391_x_at  | <i>TRIM24</i>           | 2.3874655 | 1.2554798 | 2.3874655 | up | chr7:138145179-138270330 (+) // 95.9 // q33           |
| 210369_at    | <i>SWAP70</i>           | 2.3866537 | 1.2549893 | 2.3866537 | up | chr11:9685681-9763485 (+) // 94.84 // p15.4           |
| 238568_s_at  | <i>NPC1</i>             | 2.3854456 | 1.2542588 | 2.3854456 | up | chr18:21101555-21102363 (-) // 76.14 // q11.2         |
| 79005_at     | <i>SLC35E1</i>          | 2.3836157 | 1.2531517 | 2.3836157 | up | chr19:16663454-16663733 (-) // 62.61 // p13.11        |
| 211561_x_at  | <i>MAPK14</i>           | 2.3835502 | 1.253112  | 2.3835502 | up | chr6:35995916-36076386 (+) // 79.34 // p21.31         |
| 1563455_at   | <i>SIK3</i>             | 2.3824208 | 1.2524282 | 2.3824208 | up | chr11:116821216-116827259 (-) // 50.89 // q23.3       |
| 1552485_at   | <i>LACTB</i>            | 2.381092  | 1.2516234 | 2.381092  | up | chr15:63414026-63422025 (+) // 86.16 // q22.2         |
| 225783_at    | <i>UBE2F</i>            | 2.3806956 | 1.2513832 | 2.3806956 | up | chr2:238875684-238951236 (+) // 92.51 // q37.3        |
| 1554543_at   | <i>SPAG9</i>            | 2.3780084 | 1.2497538 | 2.3780084 | up | chr17:49108293-49124197 (-) // 73.77 // q21.33        |
| 213280_at    | <i>RAP1GAP2</i>         | 2.377942  | 1.2497135 | 2.377942  | up | chr17:2894633-2941035 (+) // 95.93 // p13.3           |
| 226250_at    |                         | 2.3760397 | 1.248559  | 2.3760397 | up | chr3:114050913-114053440 (-) // 94.93 // q13.31       |
| 201349_at    | <i>SLC9A3R1</i>         | 2.3759587 | 1.2485098 | 2.3759587 | up | chr17:72744783-72765494 (+) // 98.6 // q25.1          |
| 210449_x_at  | <i>MAPK14</i>           | 2.375374  | 1.2481548 | 2.375374  | up | chr6:35995919-36076261 (+) // 100.0 // p21.31         |
| 1555843_at   | <i>HNRNPM</i>           | 2.372789  | 1.2465837 | 2.372789  | up | chr19:8551907-8553994 (+) // 95.06 // p13.2           |
| 238159_at    |                         | 2.3726704 | 1.2465117 | 2.3726704 | up | chr1:153845460-153846027 (-) // 20.79 // q21.3        |
| 1568941_a_at | <i>HNRNPC</i>           | 2.3721528 | 1.246197  | 2.3721528 | up | chr14:21736028-21737069 (-) // 87.43 // q11.2         |
| 223130_s_at  | <i>MYLIP</i>            | 2.3716104 | 1.245867  | 2.3716104 | up | chr6:16129401-16148476 (+) // 98.97 // p22.3          |
| 228471_at    | <i>ANKRD44</i>          | 2.371604  | 1.2458631 | 2.371604  | up | chr2:197853275-197854481 (-) // 93.88 // q33.1        |
| 230099_at    |                         | 2.3709335 | 1.2454553 | 2.3709335 | up | chr17:66099809-66100407 (+) // 94.94 //               |
| 243739_at    |                         | 2.3705328 | 1.2452114 | 2.3705328 | up | q24.2///chr17:62655656-62656252 (-) // 97.23 // q24.1 |
| 239783_at    |                         | 2.3704073 | 1.245135  | 2.3704073 | up | chr6:13636056-13636400 (-) // 7.91 // p23             |
| 226782_at    | <i>SLC25A30</i>         | 2.3703516 | 1.245101  | 2.3703516 | up | chr6:42219277-42219884 (-) // 88.33 // p21.1          |
| 242235_x_at  |                         | 2.3702786 | 1.2450566 | 2.3702786 | up | chr13:45967279-45968395 (-) // 98.59 // q14.13        |
| 238611_at    |                         | 2.3701034 | 1.2449499 | 2.3701034 | up | chr1:52304418-52305406 (-) // 72.09 // p32.3          |
|              |                         |           |           |           |    | chr19:8540559-8541444 (-) // 79.35 // p13.2           |

|              |                   |           |           |              |                                                        |
|--------------|-------------------|-----------|-----------|--------------|--------------------------------------------------------|
| 225033_at    | ST3GAL1           | 2.368205  | 1.243794  | 2.368205 up  | chr8:134467091-134470076 (-) // 92.04 // q24.22        |
| 202880_s_at  | CYTH1             | 2.367046  | 1.2430878 | 2.367046 up  | chr17:76670131-76778376 (-) // 99.64 // q25.3          |
| 215623_x_at  | SMC4              | 2.3658166 | 1.2423382 | 2.3658166 up | chr3:160117480-160132288 (+) // 85.73 // q25.33        |
| 221580_s_at  | MIR1304///SNORA1/ | 2.364869  | 1.2417604 | 2.364869 up  | chr11:93463447-93474636 (-) // 98.66 // q21            |
| 244090_at    |                   | 2.3644862 | 1.2415267 | 2.3644862 up | chr3:4674028-4674549 (+) // 36.08 // p26.1             |
| 203607_at    | INPP5F            | 2.3638506 | 1.2411388 | 2.3638506 up | chr10:121485608-121588652 (+) // 94.05 // q26.11       |
| 242659_at    |                   | 2.3636062 | 1.2409897 | 2.3636062 up | chrX:129230606-129231109 (+) // 46.85 // q26.1         |
|              |                   |           |           |              | chr1:143717142-143721167 (-) // 27.48 //               |
| 1556033_at   | FLJ39739          | 2.3634403 | 1.2408884 | 2.3634403 up | q21.1///chr1:147904651-147908676 (-) // 27.48 // q21.2 |
| 1553134_s_at | C9orf72           | 2.3630714 | 1.2406633 | 2.3630714 up | chr9:27560422-27573864 (-) // 74.14 // p21.2           |
| 214594_x_at  | ATP8B1            | 2.361081  | 1.2394475 | 2.361081 up  | chr18:55315027-55399039 (-) // 88.43 // q21.31         |
| 221765_at    | UGCG              | 2.3590224 | 1.2381891 | 2.3590224 up | chr9:114695349-114697649 (+) // 93.05 // q31.3         |
| 227200_at    | ETV3              | 2.3583066 | 1.2377514 | 2.3583066 up | chr1:157090982-157092788 (-) // 93.08 // q23.1         |
| 225831_at    | LUZP1             | 2.3577902 | 1.2374353 | 2.3577902 up | chr1:23410522-23414891 (-) // 84.59 // p36.12          |
| 232312_at    | PPP6R3            | 2.3556676 | 1.236136  | 2.3556676 up | chr11:68334522-68375494 (+) // 37.57 // q13.2          |
|              |                   |           |           |              | chr5:177306693-177307431 (+) // 60.65 //               |
| 236149_at    |                   | 2.3547747 | 1.235589  | 2.3547747 up | q35.3///chr5:175390372-175391109 (-) // 60.65 // q35.2 |
| 1561155_at   |                   | 2.353936  | 1.2350751 | 2.353936 up  | chr15:43930505-43930948 (-) // 27.78 // q15.3          |
| 240659_x_at  |                   | 2.3524652 | 1.2341733 | 2.3524652 up | chr14:45707331-45707616 (-) // 95.92 // q21.2          |
| 243619_at    | FGFR1OP2          | 2.3513305 | 1.2334774 | 2.3513305 up | chr12:27114408-27115052 (+) // 39.81 // p11.23         |
| 232722_at    | RNASET2           | 2.349863  | 1.2325766 | 2.349863 up  | chr6:167346862-167370679 (-) // 76.91 // q27           |
| 232253_at    | C5orf56           | 2.3498423 | 1.232564  | 2.3498423 up | chr5:131790926-131794028 (+) // 50.21 // q31.1         |
| 243593_s_at  |                   | 2.34853   | 1.231758  | 2.34853 up   | chr19:8540988-8541443 (+) // 88.08 // p13.2            |
| 243399_at    |                   | 2.344686  | 1.2293948 | 2.344686 up  | chr2:43023056-43024213 (+) // 61.18 // p21             |
| 201161_s_at  | YBX3              | 2.3426583 | 1.2281466 | 2.3426583 up | chr12:10852050-10875885 (-) // 90.16 // p13.2          |
|              |                   |           |           |              | chr2:185113645-185114262 (+) // 51.82 //               |
| 228189_at    | BAG4              | 2.3405218 | 1.2268302 | 2.3405218 up | q32.1///chr8:38070214-38070819 (+) // 54.68 // p11.23  |
| 1558173_a_at | LUZP1             | 2.339792  | 1.2263803 | 2.339792 up  | chr1:23419935-23504301 (-) // 93.72 // p36.12          |
| 217437_s_at  | TACC1             | 2.3393083 | 1.226082  | 2.3393083 up | chr8:38677849-38708293 (+) // 93.42 // p11.22          |
| 242376_at    |                   | 2.3386047 | 1.225648  | 2.3386047 up | chr19:39935177-39935734 (-) // 24.69 // q13.2          |
| 241501_at    |                   | 2.336371  | 1.2242694 | 2.336371 up  | chr2:68978986-68979456 (+) // 65.36 // p13.3           |
| 1569499_at   |                   | 2.3362057 | 1.2241673 | 2.3362057 up | chr3:141733172-141734014 (-) // 12.2 // q23            |
| 242853_at    |                   | 2.335648  | 1.2238228 | 2.335648 up  | chr3:194197509-194197940 (-) // 54.32 // q29           |
| 204542_at    | ST6GALNAC2        | 2.3342948 | 1.2229867 | 2.3342948 up | chr17:74561460-74581929 (-) // 98.9 // q25.1           |
| 244611_at    | MED13             | 2.3327923 | 1.2220578 | 2.3327923 up | chr17:60106364-60107055 (-) // 79.02 // q23.2          |
| 1555137_a_at | FGD6              | 2.3323078 | 1.2217582 | 2.3323078 up | chr12:95479318-95531395 (-) // 97.17 // q22            |

|              |                    |           |           |           |    |                                                         |
|--------------|--------------------|-----------|-----------|-----------|----|---------------------------------------------------------|
| 201662_s_at  | ACSL3              | 2.3318691 | 1.2214868 | 2.3318691 | up | chr2:223765396-223806954 (+) // 99.28 // q36.1          |
| 215032_at    | RREB1              | 2.3301418 | 1.2204177 | 2.3301418 | up | chr6:7220744-7223042 (+) // 70.51 // p24.3              |
| 213541_s_at  | ERG                | 2.3292933 | 1.2198923 | 2.3292933 | up | chr21:39753379-39754939 (-) // 94.4 // q22.2            |
| 205105_at    | MAN2A1             | 2.3280847 | 1.2191435 | 2.3280847 | up | chr5:109025608-109202858 (+) // 99.83 // q21.3          |
| 201295_s_at  | WSB1               | 2.3278236 | 1.2189817 | 2.3278236 | up | chr17:25621138-25640924 (+) // 92.35 // q11.1           |
| 244847_at    |                    | 2.3277588 | 1.2189416 | 2.3277588 | up | chr5:137272641-137273293 (-) // 99.24 // q31.2          |
| 239224_at    | FBXL20             | 2.3275912 | 1.2188377 | 2.3275912 | up | chr17:37420143-37420641 (-) // 83.56 // q12             |
| 201160_s_at  | YBX3               | 2.3273833 | 1.2187088 | 2.3273833 | up | chr12:10851688-10875953 (-) // 90.13 // p13.2           |
| 233642_s_at  | HEATR5B            | 2.327224  | 1.21861   | 2.327224  | up | chr2:37208152-37241073 (-) // 99.73 // p22.2            |
| 207465_at    | LOC100127886       | 2.326728  | 1.2183026 | 2.326728  | up | chr20:39665646-39666824 (-) // 88.65 // q12             |
| 201859_at    | SRGN               | 2.3241174 | 1.2166829 | 2.3241174 | up | chr10:70847896-70864558 (+) // 99.24 // q22.1           |
|              |                    |           |           |           |    | chr1:147896915-147897375 (+) // 97.87 //                |
|              |                    |           |           |           |    | q21.2///chr1:143709406-143709866 (+) // 97.87 //        |
|              |                    |           |           |           |    | q21.1///chr1:144460271-144460731 (-) // 94.26 //        |
|              |                    |           |           |           |    | q21.1///chr1:144280028-144280488 (-) // 94.26 // q21.1  |
| 237173_at    | LINC00623///LOC728 | 2.3240092 | 1.2166158 | 2.3240092 | up | chr15:90804342-91105865 (-) // 30.64 // q26.1           |
| 1566033_at   |                    | 2.3236506 | 1.2163931 | 2.3236506 | up | chr2:68423971-68425210 (-) // 16.84 // p14              |
| 1565810_at   |                    | 2.32346   | 1.2162749 | 2.32346   | up | chr11:70116814-70224498 (+) // 97.94 // q13.3           |
| 210236_at    | PPFIA1             | 2.3230999 | 1.2160511 | 2.3230999 | up | chr12:52345501-52389473 (+) // 98.7 // q13.13           |
| 205209_at    | ACVR1B             | 2.320369  | 1.2143543 | 2.320369  | up | chr20:47905018-47905793 (+) // 83.27 // q13.13          |
| 229899_s_at  | ZFAS1              | 2.3200953 | 1.214184  | 2.3200953 | up | chr9:114126072-114126534 (-) // 93.42 // q31.3          |
| 236368_at    | KIAA0368           | 2.3179553 | 1.2128527 | 2.3179553 | up | chr18:21113317-21115474 (-) // 82.95 // q11.2           |
| 217584_at    | NPC1               | 2.316298  | 1.2118208 | 2.316298  | up |                                                         |
| 211435_at    |                    | 2.3159547 | 1.2116071 | 2.3159547 | up | chr7:131155035-131157706 (+) // 86.17 // q32.3          |
| 1560145_at   | MKLN1              | 2.3150568 | 1.2110476 | 2.3150568 | up | chr9:97109905-97110721 (+) // 99.14 //                  |
|              |                    |           |           |           |    | q22.32///chr9:99671481-99672297 (-) // 99.27 // q22.33  |
| 239321_at    | LOC441454          | 2.3137898 | 1.2102578 | 2.3137898 | up | chr6:35995572-36078535 (+) // 98.64 // p21.31           |
| 202530_at    | MAPK14             | 2.3103566 | 1.2081156 | 2.3103566 | up | chr11:60897731-60899007 (-) // 98.68 // q12.2           |
| 219053_s_at  | VPS37C             | 2.3102496 | 1.2080487 | 2.3102496 | up | chr2:17846665-17935070 (-) // 99.1 // p24.2             |
| 218781_at    | SMC6               | 2.3086505 | 1.2070498 | 2.3086505 | up | chr8:52739489-52744125 (-) // 81.01 // q11.23           |
| 244706_at    | PCMTD1             | 2.3076043 | 1.2063959 | 2.3076043 | up | chr10:48209054-48210255 (+) // 97.09 //                 |
|              |                    |           |           |           |    | q11.22///chr10:47219094-47220295 (-) // 97.09 //        |
|              |                    |           |           |           |    | q11.22///chr10:49245224-49246425 (-) // 96.76 //        |
|              |                    |           |           |           |    | q11.22///chr10:46738678-46739976 (-) // 97.84 //        |
|              |                    |           |           |           |    | q11.22///chr10:48928440-48929738 (-) // 97.67 // q11.22 |
| 238553_at    | AGAP9///BMS1P1///E | 2.3073611 | 1.2062438 | 2.3073611 | up | chr10:33190494-33224486 (-) // 96.04 // p11.22          |
| 1553530_a_at | ITGB1              | 2.3069656 | 1.2059965 | 2.3069656 | up |                                                         |

|              |                     |           |           |           |    |                                                                                            |
|--------------|---------------------|-----------|-----------|-----------|----|--------------------------------------------------------------------------------------------|
| 213022_s_at  | <i>UTRN</i>         | 2.304888  | 1.2046967 | 2.304888  | up | chr6:144612964-145172605 (+) // 99.56 // q24.2                                             |
| 225999_at    | <i>RIMKLB</i>       | 2.3027768 | 1.2033746 | 2.3027768 | up | chr12:8850632-8929787 (+) // 98.57 // p13.31                                               |
| 239428_at    |                     | 2.3026724 | 1.2033092 | 2.3026724 | up | chr2:65356290-65356855 (-) // 98.6 // p14                                                  |
| 229548_at    |                     | 2.2983255 | 1.2005831 | 2.2983255 | up | chr22:39138385-39139291 (+) // 98.24 // q13.1                                              |
| 238610_s_at  |                     | 2.2979496 | 1.2003472 | 2.2979496 | up | chr19:8540559-8541444 (-) // 79.35 // p13.2                                                |
| 235844_at    | <i>PHTF1</i>        | 2.297081  | 1.1998017 | 2.297081  | up | chr1:114242889-114243842 (-) // 64.94 // p13.2                                             |
| 219499_at    | <i>SEC61A2</i>      | 2.295838  | 1.199021  | 2.295838  | up | chr10:12198907-12206826 (+) // 100.0 // p14                                                |
| 202879_s_at  | <i>CYTH1</i>        | 2.2957065 | 1.1989383 | 2.2957065 | up | chr17:76669982-76778376 (-) // 98.55 // q25.3                                              |
| 216649_at    | <i>RREB1</i>        | 2.294925  | 1.198447  | 2.294925  | up | chr6:7231812-7249037 (-) // 99.49 // p24.3                                                 |
| 1561370_at   | <i>LOC100505716</i> | 2.2943103 | 1.1980605 | 2.2943103 | up | chr2:28530559-28533322 (-) // 54.96 // p23.2                                               |
| 231892_at    | <i>ARHGEF39</i>     | 2.294218  | 1.1980025 | 2.294218  | up | chr9:35659784-35665228 (-) // 71.22 // p13.3                                               |
| 232483_at    | <i>MED17</i>        | 2.2934997 | 1.1975508 | 2.2934997 | up | chr11:93517447-93522964 (+) // 66.7 // q21                                                 |
| 225054_x_at  | <i>LINC00674</i>    | 2.292521  | 1.1969349 | 2.292521  | up | chr17:66122232-66127003 (+) // 91.46 // q24.2                                              |
| 236107_at    | <i>UBE2Z</i>        | 2.2880113 | 1.1940942 | 2.2880113 | up | chr17:46989419-46989876 (+) // 93.39 // q21.32                                             |
| 232017_at    | <i>TJP2</i>         | 2.2876585 | 1.1938717 | 2.2876585 | up | chr9:71862092-71863975 (+) // 98.78 // q21.11                                              |
| 1552258_at   | <i>LINC00152</i>    | 2.2860143 | 1.1928344 | 2.2860143 | up | chr2:87819437-87821034 (+) // 86.63 // p11.2//chr2:112186888-112188485 (-) // 86.33 // q13 |
| 225954_s_at  | <i>MIDN</i>         | 2.2851286 | 1.1922754 | 2.2851286 | up | chr19:1256042-1259034 (+) // 78.22 // p13.3                                                |
| 1558044_s_at | <i>EXOSC6</i>       | 2.2850473 | 1.192224  | 2.2850473 | up | chr16:70281198-70430395 (-) // 34.58 // q22.1                                              |
| 242403_at    |                     | 2.2792091 | 1.1885333 | 2.2792091 | up | chr4:103735634-103736186 (-) // 76.34 // q24                                               |
| 238433_at    | <i>SNX5</i>         | 2.2770762 | 1.1871827 | 2.2770762 | up | chr20:17941406-17942870 (-) // 91.64 // p11.23                                             |
| 226631_at    | <i>METTL10</i>      | 2.276094  | 1.1865602 | 2.276094  | up | chr10:126446402-126454158 (-) // 84.47 // q26.13                                           |
| 211702_s_at  | <i>USP32</i>        | 2.27587   | 1.1864182 | 2.27587   | up | chr17:58256471-58332619 (-) // 98.58 // q23.1                                              |
| 217814_at    | <i>CCDC47</i>       | 2.2754972 | 1.1861818 | 2.2754972 | up | chr17:61822610-61850936 (-) // 96.66 // q23.3                                              |
| 211086_x_at  | <i>NEK1</i>         | 2.27545   | 1.1861519 | 2.27545   | up | chr4:170509799-170510631 (-) // 80.56 // q33                                               |
| 214405_at    |                     | 2.2744215 | 1.1854997 | 2.2744215 | up | chr10:11318419-11320073 (+) // 98.27 // p14                                                |
| 226363_at    | <i>ABCC5</i>        | 2.2727    | 1.1844072 | 2.2727    | up | chr3:183701540-183703272 (-) // 95.78 // q27.1                                             |
| 232879_at    | <i>CRTC3</i>        | 2.2708127 | 1.1832087 | 2.2708127 | up | chr15:91082848-91138792 (+) // 82.19 // q26.1                                              |
| 242642_at    |                     | 2.270711  | 1.1831441 | 2.270711  | up | chr17:8357289-8357709 (+) // 19.14 // p13.1                                                |
| 240990_at    | <i>RAB5A</i>        | 2.270363  | 1.1829231 | 2.270363  | up | chr3:20019923-20020383 (+) // 82.86 // p24.3                                               |
| 233425_at    |                     | 2.2691696 | 1.1821644 | 2.2691696 | up | chr18:60218435-60219738 (+) // 45.85 // q21.33                                             |
| 202677_at    | <i>RASA1</i>        | 2.2684    | 1.181675  | 2.2684    | up | chr5:86564150-86687732 (+) // 98.4 // q14.3                                                |
| 239437_at    |                     | 2.2670403 | 1.18081   | 2.2670403 | up | chr6:116593437-116593905 (-) // 85.47 // q22.1                                             |
| 203408_s_at  | <i>SATB1</i>        | 2.2644756 | 1.179177  | 2.2644756 | up | chr3:18390239-18465306 (-) // 96.71 // p24.3                                               |
| 235708_at    | <i>KLB</i>          | 2.2640219 | 1.1788878 | 2.2640219 | up | chr4:39452050-39453138 (+) // 97.57 // p14                                                 |
| 201537_s_at  | <i>DUSP3</i>        | 2.2632315 | 1.1783842 | 2.2632315 | up | chr17:41845676-41856339 (-) // 98.5 // q21.31                                              |

|             |                   |           |           |           |    |                                                  |
|-------------|-------------------|-----------|-----------|-----------|----|--------------------------------------------------|
| 206036_s_at | REL               | 2.2612715 | 1.1771342 | 2.2612715 | up | chr2:61108799-61149970 (+) // 92.73 // p16.1     |
| 235242_at   | OTTHUMG00000179   | 2.2607863 | 1.1768246 | 2.2607863 | up | chr2:61154042-61155310 (+) // 55.23 // p16.1     |
| 210621_s_at | RASA1             | 2.2594624 | 1.1759795 | 2.2594624 | up | chr5:86564765-86687435 (+) // 99.74 // q14.3     |
| 236612_at   |                   | 2.2593896 | 1.1759331 | 2.2593896 | up | chr14:64178915-64179434 (-) // 41.15 // q23.2    |
| 239948_at   | NUP153            | 2.256314  | 1.1739678 | 2.256314  | up | chr6:17645709-17648100 (-) // 82.68 // p22.3     |
| 242255_at   | WDR37             | 2.2554133 | 1.1733918 | 2.2554133 | up | chr10:1095763-1096200 (+) // 25.61 // p15.3      |
| 220265_at   | GPR107            | 2.254287  | 1.1726712 | 2.254287  | up | chr9:132816199-132870596 (+) // 98.38 // q34.11  |
| 242978_x_at |                   | 2.253639  | 1.1722565 | 2.253639  | up | chr1:160955505-160955966 (-) // 20.99 // q23.3   |
| 226525_at   | STK17B            | 2.2529666 | 1.1718259 | 2.2529666 | up | chr2:196998306-197000092 (-) // 68.17 // q32.3   |
| 202016_at   | MEST              | 2.2518957 | 1.17114   | 2.2518957 | up | chr7:130131936-130146133 (+) // 98.14 // q32.2   |
| 230395_at   | CTB-31N19.3//OTTH | 2.251576  | 1.1709352 | 2.251576  | up | chr16:21637824-21638934 (+) // 92.01 // p12.2    |
| 217212_s_at | IL9R              | 2.2515624 | 1.1709265 | 2.2515624 | up | chr16:79335-86487 (-) // 97.08 // p13.3          |
| 243063_at   |                   | 2.2497725 | 1.1697792 | 2.2497725 | up | chr4:99181070-99181559 (-) // 97.02 // q23       |
| 209168_at   | GPM6B             | 2.2487211 | 1.1691048 | 2.2487211 | up | chrX:13789041-13835178 (-) // 96.02 // p22.2     |
| 212209_at   | MED13L            | 2.2484329 | 1.1689198 | 2.2484329 | up | chr12:116396380-116457132 (-) // 99.27 // q24.21 |
| 209685_s_at | PRKCB             | 2.2480223 | 1.1686563 | 2.2480223 | up | chr16:23847432-24226968 (+) // 97.02 // p12.2    |
| 1563113_at  | UBR4              | 2.2475402 | 1.168347  | 2.2475402 | up | chr1:19535917-19536750 (-) // 82.68 // p36.13    |
| 210077_s_at | SRSF5             | 2.2470803 | 1.1680517 | 2.2470803 | up | chr14:70233898-70236114 (+) // 99.8 // q24.2     |
| 208116_s_at | MAN1A1            | 2.246355  | 1.167586  | 2.246355  | up | chr6:119500316-119670089 (-) // 74.71 // q22.31  |
| 212747_at   | ANKS1A            | 2.2408235 | 1.164029  | 2.2408235 | up | chr6:34857037-35059183 (+) // 98.45 // p21.31    |
| 242163_at   | THRAP3            | 2.2398345 | 1.1633922 | 2.2398345 | up | chr1:36754035-36754722 (+) // 97.99 // p34.3     |
| 226958_s_at | MED11             | 2.238781  | 1.1627134 | 2.238781  | up | chr17:4634715-4636902 (+) // 93.24 // p13.2      |
| 203843_at   | RPS6KA3           | 2.2376394 | 1.1619776 | 2.2376394 | up | chrX:20171751-20284750 (-) // 92.45 // p22.12    |
| 205214_at   | STK17B            | 2.2372644 | 1.1617358 | 2.2372644 | up | chr2:197001926-197036273 (-) // 99.75 // q32.3   |
| 236911_at   | RIMKLB            | 2.237231  | 1.1617142 | 2.237231  | up | chr12:8931300-8931686 (+) // 97.72 // p13.31     |
| 212207_at   | MED13L            | 2.2372153 | 1.1617041 | 2.2372153 | up | chr12:116396380-116457132 (-) // 99.27 // q24.21 |
| 240220_at   |                   | 2.2368674 | 1.1614798 | 2.2368674 | up | chr20:45019271-45019835 (-) // 98.08 // q13.12   |
| 1569003_at  | VMP1              | 2.2357757 | 1.1607754 | 2.2357757 | up | chr17:57915319-57916647 (-) // 74.91 // q23.1    |
| 1554106_at  | NBEAL1            | 2.2352264 | 1.1604209 | 2.2352264 | up | chr2:203879602-203922164 (+) // 47.69 // q33.2   |
| 239237_at   | LOC100506776      | 2.2338095 | 1.1595061 | 2.2338095 | up |                                                  |
| 242904_x_at |                   | 2.2330968 | 1.1590458 | 2.2330968 | up | chr8:29940609-29940977 (+) // 67.02 // p12       |
| 229571_at   |                   | 2.232003  | 1.158339  | 2.232003  | up | chr2:47401406-47402282 (-) // 81.2 // p21        |
| 202815_s_at | HEXIM1            | 2.2318168 | 1.1582186 | 2.2318168 | up | chr17:43225868-43229463 (+) // 90.48 // q21.31   |
| 212569_at   | SMCHD1            | 2.229688  | 1.1568418 | 2.229688  | up | chr18:2739473-2805012 (+) // 91.02 // p11.32     |
| 204843_s_at | PRKAR2A           | 2.2286096 | 1.1561439 | 2.2286096 | up | chr3:48788678-48885218 (-) // 98.85 // p21.31    |
| 244597_at   |                   | 2.2278776 | 1.1556699 | 2.2278776 | up | chr2:201237424-201237993 (+) // 35.6 // q33.1    |

|             |                         |           |           |           |    |                                                  |
|-------------|-------------------------|-----------|-----------|-----------|----|--------------------------------------------------|
| 1555960_at  | <i>HINT1</i>            | 2.2277343 | 1.1555772 | 2.2277343 | up | chr5:130494977-130497736 (-) // 58.23 // q23.3   |
| 239307_at   | <i>AF001548.5//OTTH</i> | 2.2235656 | 1.152875  | 2.2235656 | up | chr16:15826373-15826872 (+) // 49.5 // p13.11    |
| 244162_at   |                         | 2.2232773 | 1.1526879 | 2.2232773 | up | chr4:56269590-56270123 (+) // 92.34 // q12       |
| 216203_at   | <i>SPTLC2</i>           | 2.2207692 | 1.1510594 | 2.2207692 | up | chr14:78001943-78063664 (-) // 85.16 // q24.3    |
| 243376_at   | <i>TANK</i>             | 2.2188044 | 1.1497824 | 2.2188044 | up | chr2:162018186-162019190 (+) // 30.45 // q24.2   |
| 242268_at   | <i>CELF2</i>            | 2.216953  | 1.1485783 | 2.216953  | up | chr10:11269513-11270692 (+) // 90.24 // p14      |
| 206874_s_at | <i>SLK</i>              | 2.2152903 | 1.1474957 | 2.2152903 | up | chr10:105726992-105788991 (+) // 95.42 // q24.33 |
| 214056_at   | <i>MCL1</i>             | 2.2135248 | 1.1463456 | 2.2135248 | up | chr1:150546966-150549029 (+) // 98.51 // q21.3   |
| 1557703_at  |                         | 2.2097428 | 1.1438785 | 2.2097428 | up | chr2:160570686-160571340 (+) // 46.6 // q24.2    |
| 218814_s_at | <i>TMEM206</i>          | 2.2096186 | 1.1437973 | 2.2096186 | up | chr1:212537272-212588237 (-) // 98.18 // q32.3   |
| 202708_s_at | <i>HIST2H2BE</i>        | 2.2090743 | 1.1434419 | 2.2090743 | up | chr1:149856009-149858232 (-) // 87.13 // q21.2   |
| 213065_at   | <i>ZFC3H1</i>           | 2.207997  | 1.1427383 | 2.207997  | up | chr12:72003261-72025625 (-) // 94.43 // q21.1    |
| 226762_at   | <i>PURB</i>             | 2.2079117 | 1.1426824 | 2.2079117 | up | chr7:44916847-44920664 (-) // 97.71 // p13       |
| 238360_s_at | <i>LINC00672</i>        | 2.2062814 | 1.1416168 | 2.2062814 | up | chr17:37081432-37082920 (+) // 99.59 // q12      |
| 225636_at   | <i>STAT2</i>            | 2.204572  | 1.1404986 | 2.204572  | up | chr12:56735380-56736269 (-) // 44.17 // q13.3    |
| 232551_at   | <i>SLC26A6</i>          | 2.2021232 | 1.1388952 | 2.2021232 | up | chr19:15384645-15385514 (-) // 98.41 // p13.12   |
| 209185_s_at | <i>IRS2</i>             | 2.2017493 | 1.1386502 | 2.2017493 | up | chr13:110406183-110438915 (-) // 88.04 // q34    |
| 202978_s_at | <i>CREBZF</i>           | 2.2010465 | 1.1381896 | 2.2010465 | up | chr11:85372109-85376176 (-) // 92.75 // q14.1    |
| 236742_at   |                         | 2.2003171 | 1.1377115 | 2.2003171 | up | chr8:68237473-68237917 (-) // 98.67 // q13.2     |
| 221253_s_at | <i>BLOC1S5-TXNDC5/</i>  | 2.1951866 | 1.1343436 | 2.1951866 | up | chr6:7881749-7904957 (-) // 97.53 // p24.3       |
| 209170_s_at | <i>GPM6B</i>            | 2.1949537 | 1.1341906 | 2.1949537 | up | chrX:13792098-13835153 (-) // 90.8 // p22.2      |
| 239803_at   |                         | 2.1946096 | 1.1339643 | 2.1946096 | up |                                                  |
| 201329_s_at | <i>ETS2</i>             | 2.194437  | 1.1338509 | 2.194437  | up | chr21:40177754-40195380 (+) // 96.08 // q22.2    |
| 1559174_at  | <i>RAB6A</i>            | 2.194112  | 1.1336372 | 2.194112  | up | chr11:73440978-74089368 (-) // 35.83 // q13.4    |
| 236747_at   | <i>LOC100507066</i>     | 2.193986  | 1.1335542 | 2.193986  | up | chr12:122883998-122884491 (+) // 98.4 // q24.31  |
| 231541_s_at | <i>SPAG5-AS1</i>        | 2.1926959 | 1.1327057 | 2.1926959 | up | chr17:26942701-26944390 (+) // 99.24 // q11.2    |
| 229410_at   | <i>SLC35E1</i>          | 2.1905227 | 1.1312752 | 2.1905227 | up | chr19:16660641-16663493 (-) // 82.48 // p13.11   |
| 233861_at   |                         | 2.1890087 | 1.1302778 | 2.1890087 | up |                                                  |
| 1552375_at  | <i>ZNF333</i>           | 2.185043  | 1.1276617 | 2.185043  | up | chr19:14800912-14832569 (+) // 57.34 // p13.12   |
| 206723_s_at | <i>LPAR2</i>            | 2.184009  | 1.1269789 | 2.184009  | up | chr19:19734477-19738975 (-) // 98.9 // p13.11    |
| 239603_x_at |                         | 2.1813517 | 1.1252224 | 2.1813517 | up |                                                  |
| 238700_at   | <i>PIAS2</i>            | 2.1812704 | 1.1251686 | 2.1812704 | up | chr18:44390230-44390886 (-) // 98.34 // q21.1    |
| 222488_s_at | <i>DCTN4</i>            | 2.1790292 | 1.1236856 | 2.1790292 | up | chr5:150088308-150138576 (-) // 98.17 // q33.1   |
| 243768_at   |                         | 2.1785078 | 1.1233402 | 2.1785078 | up | chr6:76353327-76353919 (+) // 29.13 // q14.1     |
| 208158_s_at | <i>OSBPL1A</i>          | 2.177963  | 1.1229794 | 2.177963  | up | chr18:21742011-21977790 (-) // 99.64 // q11.2    |
| 244607_at   |                         | 2.1761348 | 1.1217679 | 2.1761348 | up | chr6:37793265-37793986 (+) // 94.29 // p21.2     |

|              |                         |           |           |              |                                                       |
|--------------|-------------------------|-----------|-----------|--------------|-------------------------------------------------------|
| 228159_at    |                         | 2.175567  | 1.1213914 | 2.175567 up  | chr13:52340121-52340929 (+) // 97.58 // q14.3         |
| 235317_at    | <i>LOC284454</i>        | 2.1735113 | 1.1200275 | 2.1735113 up | chr19:13945107-13945798 (-) // 50.74 // p13.13        |
| 222728_s_at  | <i>MIR1304//SNORA1/</i> | 2.1722934 | 1.1192191 | 2.1722934 up | chr11:93471473-93472499 (-) // 86.01 // q21           |
| 212972_x_at  | <i>APBB2</i>            | 2.170544  | 1.1180565 | 2.170544 up  | chr4:40812044-40816814 (-) // 79.15 // p14            |
|              |                         |           |           |              | chr17:41423734-41424196 (+) // 86.8 //                |
| 239648_at    | <i>DCUN1D3</i>          | 2.1704533 | 1.1179965 | 2.1704533 up | q21.31//chr16:20869395-20869857 (-) // 93.07 // p12.3 |
| 1570409_x_at |                         | 2.170367  | 1.117939  | 2.170367 up  | chr13:99188632-99190507 (-) // 69.42 // q32.2         |
| 225154_at    | <i>SYAP1</i>            | 2.1694887 | 1.1173551 | 2.1694887 up | chrX:16737731-16779333 (+) // 85.84 // p22.2          |
| 238958_at    |                         | 2.1692142 | 1.1171725 | 2.1692142 up | chr3:23930931-23931808 (-) // 80.77 // p24.2          |
| 240362_at    | <i>MPC1</i>             | 2.1690965 | 1.1170943 | 2.1690965 up | chr6:166783144-166783753 (-) // 93.43 // q27          |
| 224454_at    | <i>ETNK1</i>            | 2.1681094 | 1.1164376 | 2.1681094 up | chr12:22778123-22797347 (+) // 91.69 // p12.1         |
| 226153_s_at  | <i>CNOT6L</i>           | 2.1680307 | 1.1163852 | 2.1680307 up | chr4:78638171-78665985 (-) // 97.82 // q21.1          |
| 1569346_a_at |                         | 2.1679986 | 1.1163638 | 2.1679986 up | chr17:3814465-3815623 (-) // 47.49 // p13.2           |
| 242911_at    | <i>MED13L</i>           | 2.1668918 | 1.115627  | 2.1668918 up | chr12:116457031-116675511 (-) // 98.73 // q24.21      |
| 238886_at    | <i>TMED10</i>           | 2.1667871 | 1.1155574 | 2.1667871 up | chr14:75605517-75606124 (-) // 76.81 // q24.3         |
| 225563_at    | <i>PAN3</i>             | 2.1666443 | 1.1154623 | 2.1666443 up | chr13:28867536-28869469 (+) // 97.26 // q12.2         |
| 221768_at    | <i>LOC100996496//SF</i> | 2.166626  | 1.1154501 | 2.166626 up  | chr1:35641981-35645390 (-) // 96.11 // p34.3          |
| 211945_s_at  | <i>ITGB1</i>            | 2.1662834 | 1.115222  | 2.1662834 up | chr10:33189245-33247170 (-) // 96.52 // p11.22        |
| 225962_at    | <i>ZNRF1</i>            | 2.1657503 | 1.1148669 | 2.1657503 up | chr16:75139280-75144609 (+) // 90.07 // q23.1         |
| 237334_at    |                         | 2.164978  | 1.1143523 | 2.164978 up  | chr10:104502869-104503247 (+) // 80.43 // q24.32      |
| 1556931_at   | <i>CDC42-IT1//CDC42</i> | 2.1649208 | 1.1143143 | 2.1649208 up | chr1:22385689-22390682 (+) // 61.03 // p36.12         |
| 214057_at    | <i>MCL1</i>             | 2.1646192 | 1.1141133 | 2.1646192 up | chr1:150546966-150549029 (+) // 98.51 // q21.3        |
| 219161_s_at  | <i>CKLF//CKLF-CMTM</i>  | 2.1646056 | 1.1141042 | 2.1646056 up | chr16:66586471-66599970 (+) // 96.08 // q21           |
| 226482_s_at  | <i>TSTD1</i>            | 2.1644905 | 1.1140275 | 2.1644905 up | chr1:161007420-161008726 (-) // 92.77 // q23.3        |
| 1556783_a_at |                         | 2.1638594 | 1.1136067 | 2.1638594 up | chr12:50551064-50551843 (+) // 39.24 // q13.12        |
| 244066_at    | <i>DENND4C</i>          | 2.1635425 | 1.1133955 | 2.1635425 up | chr9:19371071-19371761 (-) // 73.27 // p22.1          |
| 215902_at    |                         | 2.1634088 | 1.1133063 | 2.1634088 up |                                                       |
| 228747_at    | <i>SEC61A2</i>          | 2.1631398 | 1.1131269 | 2.1631398 up | chr10:12206780-12207681 (+) // 92.13 // p13           |
| 242024_at    |                         | 2.1627665 | 1.112878  | 2.1627665 up | chr7:139056799-139057756 (+) // 70.33 // q34          |
| 201294_s_at  | <i>WSB1</i>             | 2.1620805 | 1.1124203 | 2.1620805 up | chr17:25621138-25640924 (+) // 92.35 // q11.1         |
| 210958_s_at  | <i>MAST4</i>            | 2.159914  | 1.1109738 | 2.159914 up  | chr5:66461435-66463092 (+) // 96.62 // q12.3          |
| 200989_at    | <i>HIF1A</i>            | 2.158699  | 1.1101621 | 2.158699 up  | chr14:62162272-62214970 (+) // 99.08 // q23.2         |
| 230079_at    | <i>ST7L</i>             | 2.1579838 | 1.109684  | 2.1579838 up | chr1:113153077-113161718 (-) // 55.94 // p13.2        |
| 241293_x_at  |                         | 2.157741  | 1.1095217 | 2.157741 up  | chr14:78012782-78013108 (+) // 60.36 // q24.3         |
| 1563219_at   | <i>NADK2-AS1</i>        | 2.1576    | 1.1094275 | 2.1576 up    | chr5:36221156-36222003 (+) // 65.45 // p13.2          |
| 206875_s_at  | <i>SLK</i>              | 2.1560853 | 1.1084143 | 2.1560853 up | chr10:105726992-105787342 (+) // 94.47 // q24.33      |



|              |                          |           |           |              |                                                       |
|--------------|--------------------------|-----------|-----------|--------------|-------------------------------------------------------|
| 220264_s_at  | <i>GPR107</i>            | 2.1547968 | 1.1075518 | 2.1547968 up | chr9:132816199-132870596 (+) // 98.38 // q34.11       |
| 210754_s_at  | <i>LYN</i>               | 2.1524413 | 1.1059738 | 2.1524413 up | chr8:56854412-56922687 (+) // 98.75 // q12.1          |
| 202211_at    | <i>ARFGAP3</i>           | 2.152028  | 1.1056969 | 2.152028 up  | chr22:43192535-43253219 (-) // 96.25 // q13.2         |
| 243763_x_at  |                          | 2.1518998 | 1.1056108 | 2.1518998 up | chr3:197425287-197425720 (+) // 58.24 // q29          |
| 209076_s_at  | <i>WDR45B</i>            | 2.149971  | 1.1043172 | 2.149971 up  | chr17:80572452-80606194 (-) // 99.1 // q25.3          |
| 220699_s_at  | <i>PRO2214</i>           | 2.1498325 | 1.1042242 | 2.1498325 up | chr5:61604075-61605609 (+) // 57.77 // q12.1          |
|              |                          |           |           |              | chr15:30834560-30835052 (+) // 90.59 //               |
|              |                          |           |           |              | q13.2///chr15:32876021-32876513 (+) // 90.22 //       |
|              |                          |           |           |              | q13.3///chr15:30715591-30716083 (-) // 90.59 //       |
|              |                          |           |           |              | q13.2///chr15:32756969-32757461 (-) // 90.22 // q13.3 |
| 238658_at    |                          | 2.1478856 | 1.1029171 | 2.1478856 up | chr17:15949145-15949585 (-) // 39.69 // p12           |
| 240314_at    |                          | 2.1472766 | 1.1025081 | 2.1472766 up | chr15:74320153-74320783 (+) // 90.87 // q24.1         |
| 235508_at    | <i>PML</i>               | 2.146946  | 1.1022859 | 2.146946 up  | chr3:146227793-146228898 (-) // 51.31 // q24          |
| 242713_at    |                          | 2.146942  | 1.1022831 | 2.146942 up  | chr16:71952814-71961302 (+) // 16.0 // q22.2          |
| 215585_at    |                          | 2.1464915 | 1.1019804 | 2.1464915 up | chr3:156866055-156877899 (-) // 86.01 // q25.31       |
| 1555827_at   | <i>CCNL1</i>             | 2.1463299 | 1.1018718 | 2.1463299 up | chr16:28616917-28620649 (-) // 75.71 // p11.2         |
| 203615_x_at  | <i>SULT1A1</i>           | 2.1461954 | 1.1017815 | 2.1461954 up | chr8:38677849-38708293 (-) // 93.42 // p11.22         |
| 217433_at    | <i>TACC1</i>             | 2.1459548 | 1.1016197 | 2.1459548 up | chr4:16204083-16228062 (+) // 78.34 // p15.32         |
| 242318_at    | <i>TAPT1</i>             | 2.1457314 | 1.1014695 | 2.1457314 up | chr3:9799031-9811625 (-) // 98.5 // p25.3             |
| 204392_at    | <i>CAMK1</i>             | 2.1455126 | 1.1013223 | 2.1455126 up | chr17:27253292-27271726 (+) // 73.13 // q11.2         |
| 1563241_at   | <i>OTTHUMG00000179</i>   | 2.1454074 | 1.1012516 | 2.1454074 up | chr7:2415400-2415970 (+) // 74.21 // p22.3            |
| 242550_at    | <i>EIF3B</i>             | 2.1441455 | 1.1004028 | 2.1441455 up | chr1:160965984-160990925 (-) // 84.32 // q23.3        |
| 223000_s_at  | <i>F11R</i>              | 2.1439302 | 1.1002579 | 2.1439302 up | chr8:54930465-54930818 (-) // 58.89 // q11.23         |
| 241559_at    |                          | 2.143412  | 1.0999092 | 2.143412 up  | chr3:45708879-45709525 (-) // 47.8 // p21.31          |
| 241168_at    |                          | 2.1420138 | 1.0989678 | 2.1420138 up | chrX:20168028-20170750 (-) // 93.57 // p22.12         |
| 226335_at    | <i>RPS6KA3</i>           | 2.141508  | 1.0986271 | 2.141508 up  | chrX:109418218-109421014 (+) // 98.55 // q23          |
| 223201_s_at  | <i>TMEM164</i>           | 2.1404898 | 1.0979409 | 2.1404898 up | chr16:69660303-69729590 (+) // 95.0 // q22.1          |
| 215092_s_at  | <i>NFAT5</i>             | 2.1402426 | 1.0977744 | 2.1402426 up | chr4:56272748-56273587 (+) // 41.1 // q12             |
| 242306_at    |                          | 2.1389587 | 1.0969086 | 2.1389587 up | chr7:65425674-65447196 (-) // 99.86 // q11.21         |
| 202605_at    | <i>GUSB</i>              | 2.136202  | 1.0950481 | 2.136202 up  | chr10:27031543-27032355 (-) // 85.64 // p12.1         |
| 236298_at    | <i>PDSS1</i>             | 2.1338265 | 1.0934429 | 2.1338265 up | chrX:108928339-108930572 (-) // 59.89 // q23          |
| 1557419_a_at | <i>ACSL4</i>             | 2.1335618 | 1.0932639 | 2.1335618 up | chr11:60897729-60906310 (-) // 76.52 // q12.2         |
| 1560060_s_at | <i>VPS37C</i>            | 2.1328986 | 1.0928153 | 2.1328986 up | chr7:99488036-99517154 (-) // 72.7 // q22.1           |
| 224159_x_at  | <i>TRIM4</i>             | 2.1319113 | 1.0921474 | 2.1319113 up | chr17:16979351-16981066 (-) // 83.97 // p11.2         |
| 1570587_at   | <i>MPRIP-AS1///MPRIF</i> | 2.1302738 | 1.0910388 | 2.1302738 up | chr9:114803062-114904774 (-) // 91.67 // q31.3        |
| 226264_at    | <i>SUSD1</i>             | 2.129725  | 1.0906671 | 2.129725 up  | chr9:107510962-107511426 (+) // 98.93 // q31.1        |
| 240833_at    |                          | 2.129416  | 1.0904578 | 2.129416 up  |                                                       |

|              |                          |           |           |           |    |                                                        |
|--------------|--------------------------|-----------|-----------|-----------|----|--------------------------------------------------------|
| 1553338_at   | <i>SDE2</i>              | 2.1291747 | 1.0902944 | 2.1291747 | up | chr1:226172888-226187023 (-) // 99.93 // q42.12        |
| 224285_at    | <i>GPR174</i>            | 2.1283898 | 1.0897624 | 2.1283898 | up | chrX:78426468-78427726 (+) // 100.0 // q21.1           |
| 1558987_at   |                          | 2.1281009 | 1.0895665 | 2.1281009 | up | chr3:128335631-128338872 (+) // 62.85 // q21.3         |
| 216780_at    |                          | 2.126937  | 1.0887772 | 2.126937  | up | chr19:12537703-12539934 (+) // 27.85 // p13.2          |
| 230917_at    | <i>OTTHUMG00000176</i>   | 2.1261046 | 1.0882126 | 2.1261046 | up | chr16:81995840-81996292 (+) // 92.86 // q23.3          |
| 238563_at    |                          | 2.1254363 | 1.087759  | 2.1254363 | up | chr10:27047249-27047973 (-) // 97.77 // p12.1          |
| 234936_s_at  | <i>CC2D2A</i>            | 2.1234503 | 1.0864104 | 2.1234503 | up | chr4:15516457-15603169 (+) // 100.0 // p15.32          |
| 217503_at    | <i>STK17B</i>            | 2.1206284 | 1.0844917 | 2.1206284 | up | chr2:197000618-197001438 (-) // 63.12 // q32.3         |
| 1553678_a_at | <i>ITGB1</i>             | 2.120133  | 1.0841547 | 2.120133  | up | chr10:33190179-33224488 (-) // 91.14 // p11.22         |
| 242968_at    |                          | 2.1179888 | 1.082695  | 2.1179888 | up | chr8:38236826-38237277 (-) // 100.0 // p11.23          |
| 216002_at    |                          | 2.1168334 | 1.0819077 | 2.1168334 | up | chr14:65476388-65478149 (+) // 53.57 // q23.3          |
| 243683_at    | <i>MORF4L2</i>           | 2.1159787 | 1.081325  | 2.1159787 | up | chrX:102939148-102939589 (-) // 90.09 // q22.2         |
| 1558745_at   | <i>SNX29</i>             | 2.1147947 | 1.0805176 | 2.1147947 | up | chr16:12223553-12621247 (+) // 95.81 // p13.13         |
| 212220_at    | <i>PSME4</i>             | 2.111755  | 1.0784425 | 2.111755  | up | chr2:54091205-54197787 (-) // 97.97 // p16.2           |
|              |                          |           |           |           |    | chr16:29472700-29475973 (+) // 100.0 //                |
| 209607_x_at  | <i>LOC101060714///SL</i> | 2.110856  | 1.0778282 | 2.110856  | up | p11.2///chr16:30212043-30215318 (+) // 100.0 // p11.2  |
| 224038_at    | <i>TMM23</i>             | 2.109557  | 1.0769401 | 2.109557  | up | chr10:51592087-51594455 (+) // 82.68 // q11.23         |
| 1559890_a_at | <i>ABI1</i>              | 2.1087563 | 1.0763924 | 2.1087563 | up | chr10:27044552-27045476 (-) // 89.61 // p12.1          |
| 202466_at    | <i>PAPD7</i>             | 2.1087172 | 1.0763656 | 2.1087172 | up | chr5:6737619-6757156 (+) // 98.32 // p15.31            |
| 215283_at    | <i>LINC00667</i>         | 2.1079648 | 1.0758507 | 2.1079648 | up | chr18:5243922-5245188 (+) // 25.76 // p11.31           |
| 205383_s_at  | <i>ZBTB20</i>            | 2.1075048 | 1.0755359 | 2.1075048 | up | chr3:114057537-114477787 (-) // 96.75 // q13.31        |
| 203241_at    | <i>UVRAG</i>             | 2.1058285 | 1.0743879 | 2.1058285 | up | chr11:75526275-75853694 (+) // 98.03 // q13.5          |
| 208003_s_at  | <i>NFAT5</i>             | 2.1039004 | 1.0730665 | 2.1039004 | up | chr16:69599886-69731359 (+) // 98.5 // q22.1           |
| 1559436_x_at |                          | 2.1026235 | 1.0721905 | 2.1026235 | up | chr17:4614105-4616345 (+) // 66.09 // p13.2            |
| 241755_at    | <i>UQCRC2</i>            | 2.102138  | 1.0718575 | 2.102138  | up | chr16:21988020-21988676 (+) // 57.42 // p12.2          |
| 228155_at    | <i>FAM213A</i>           | 2.1012568 | 1.0712526 | 2.1012568 | up | chr10:81870460-82192752 (+) // 66.35 // q22.3          |
| 1555514_a_at | <i>PIAS2</i>             | 2.0991907 | 1.0698333 | 2.0991907 | up | chr18:44416208-44500123 (-) // 97.82 // q21.1          |
| 1565627_a_at |                          | 2.09885   | 1.069599  | 2.09885   | up | chr15:101610503-101611085 (-) // 58.16 // q26.3        |
| 1553917_at   | <i>PIKFYVE</i>           | 2.096661  | 1.0680937 | 2.096661  | up | chr2:209130990-209170269 (+) // 92.3 // q34            |
| 209272_at    | <i>NAB1</i>              | 2.093313  | 1.065788  | 2.093313  | up | chr2:191523883-191557491 (+) // 98.66 // q32.2         |
| 208325_s_at  | <i>AKAP13</i>            | 2.093292  | 1.0657736 | 2.093292  | up | chr15:86260518-86270478 (+) // 72.77 // q25.3          |
| 226018_at    | <i>C7orf41</i>           | 2.0927997 | 1.0654342 | 2.0927997 | up | chr7:30201359-30202378 (+) // 90.74 // p14.3           |
| 211628_x_at  | <i>FTH1P5</i>            | 2.0924942 | 1.0652237 | 2.0924942 | up | chr6:50880030-50881671 (-) // 44.31 // p12.3           |
| 224832_at    | <i>DUSP16</i>            | 2.0918186 | 1.0647577 | 2.0918186 | up | chr12:12626893-12674374 (-) // 98.74 // p13.2          |
|              |                          |           |           |           |    | chr10:47246996-47248902 (+) // 73.31 //                |
| 232703_at    | <i>GLUD1P7</i>           | 2.0900462 | 1.0635347 | 2.0900462 | up | q11.22///chr10:88843233-88845131 (-) // 76.27 // q23.2 |

|             |                            |           |           |           |    |                                                                                     |
|-------------|----------------------------|-----------|-----------|-----------|----|-------------------------------------------------------------------------------------|
| 1570061_at  |                            | 2.088443  | 1.0624279 | 2.088443  | up | chr3:128542557-128544443 (+) // 59.85 // q21.3                                      |
| 217670_at   | <i>RPLP2</i>               | 2.085908  | 1.0606755 | 2.085908  | up | chr11:810420-811007 (-) // 26.22 // p15.5                                           |
| 204900_x_at | <i>SAP30</i>               | 2.0846329 | 1.0597934 | 2.0846329 | up | chr4:174292093-174298682 (+) // 85.16 // q34.1                                      |
| 212418_at   | <i>ELF1</i>                | 2.0830438 | 1.0586932 | 2.0830438 | up | chr13:41506167-41593451 (-) // 94.02 // q14.11                                      |
| 244803_at   |                            | 2.0820143 | 1.0579801 | 2.0820143 | up | chr1:155651654-155652380 (-) // 68.07 // q22                                        |
| 236806_at   |                            | 2.0817888 | 1.0578237 | 2.0817888 | up | chr17:38715622-38716040 (+) // 85.48 // q21.2                                       |
| 1562084_at  |                            | 2.0811648 | 1.0573912 | 2.0811648 | up |                                                                                     |
| 209240_at   | <i>OGT</i>                 | 2.0800726 | 1.0566338 | 2.0800726 | up | chrX:70767350-70795742 (+) // 98.64 // q13.1                                        |
| 233647_s_at | <i>CDADC1</i>              | 2.0785596 | 1.0555842 | 2.0785596 | up | chr13:49821889-49841921 (+) // 91.38 // q14.2                                       |
| 202679_at   | <i>NPC1</i>                | 2.0765228 | 1.0541698 | 2.0765228 | up | chr18:21111464-21166428 (-) // 99.68 // q11.2                                       |
|             |                            |           |           |           |    | chr7:157129746-157178533 (+) // 99.69 //                                            |
| 208811_s_at | <i>DNAJB6///TMEM135</i>    | 2.0745907 | 1.0528266 | 2.0745907 | up | q36.3///chr11:127810631-127811668 (-) // 99.08 // q24.3                             |
| 228983_at   | <i>CTD-3195I5.5///OTTI</i> | 2.0738797 | 1.0523322 | 2.0738797 | up | chr17:3705456-3705920 (-) // 61.22 // p13.2                                         |
| 244537_at   |                            | 2.0734472 | 1.0520313 | 2.0734472 | up | chr4:39700112-39700644 (-) // 99.44 // p14                                          |
| 202136_at   | <i>ZMYND11</i>             | 2.0733964 | 1.051996  | 2.0733964 | up | chr10:225932-300574 (+) // 98.33 // p15.3                                           |
| 218409_s_at | <i>DNAJC1</i>              | 2.0726013 | 1.0514426 | 2.0726013 | up | chr10:22045506-22209824 (-) // 98.74 // p12.31                                      |
| 1562792_at  | <i>NIPAL1</i>              | 2.071956  | 1.0509933 | 2.071956  | up | chr4:47916243-47961158 (+) // 35.15 // p12                                          |
| 203599_s_at | <i>WBP4</i>                | 2.0718167 | 1.0508964 | 2.0718167 | up | chr13:41635696-41658137 (+) // 92.67 // q14.11                                      |
| 1560112_at  | <i>WDFY2</i>               | 2.0713758 | 1.0505893 | 2.0713758 | up | chr13:52163506-52166730 (+) // 74.65 // q14.3                                       |
| 1560622_at  |                            | 2.071274  | 1.0505185 | 2.071274  | up | chr4:56264530-56265040 (+) // 87.63 // q12                                          |
| 208223_s_at | <i>ACVR1B</i>              | 2.070682  | 1.050106  | 2.070682  | up | chr12:52345485-52386126 (+) // 91.52 // q13.13                                      |
| 225183_at   | <i>C16orf72</i>            | 2.0700994 | 1.0497    | 2.0700994 | up | chr16:9185964-9212934 (+) // 98.29 // p13.2                                         |
| 212307_s_at | <i>OGT</i>                 | 2.0689497 | 1.0488986 | 2.0689497 | up | chrX:70765566-70794505 (+) // 94.32 // q13.1                                        |
| 220594_at   | <i>OGT</i>                 | 2.0685465 | 1.0486175 | 2.0685465 | up | chrX:70752953-70765700 (+) // 91.83 // q13.1                                        |
| 1555897_at  |                            | 2.0684946 | 1.0485812 | 2.0684946 | up | chr1:23404830-23406532 (-) // 83.51 // p36.12                                       |
| 227622_at   | <i>PCF11</i>               | 2.065443  | 1.0464513 | 2.065443  | up | chr11:82868544-82869921 (+) // 87.7 // q14.1                                        |
| 225344_at   | <i>NCOA7</i>               | 2.0654387 | 1.0464482 | 2.0654387 | up | chr6:126240448-126252257 (+) // 84.3 // q22.32                                      |
| 212692_s_at | <i>LRBA</i>                | 2.0652754 | 1.0463341 | 2.0652754 | up | chr4:151185810-151792543 (-) // 96.99 // q31.3                                      |
| 241438_at   |                            | 2.0640628 | 1.0454868 | 2.0640628 | up | chr1:40648829-40649413 (+) // 79.43 // p34.2                                        |
| 212481_s_at | <i>TPM4</i>                | 2.0638525 | 1.0453398 | 2.0638525 | up | chr19:16178347-16213815 (+) // 94.11 // p13.12                                      |
|             |                            |           |           |           |    | chr8:182393-183691 (+) // 95.73 // p23.3///chr1:761586-762886 (-) // 96.7 // p36.33 |
| 220399_at   | <i>LINC00115</i>           | 2.0634913 | 1.0450875 | 2.0634913 | up | chr17:36952429-36954624 (-) // 88.71 // q12                                         |
| 1558599_at  | <i>CTB-58E17.7///OTTI</i>  | 2.0609071 | 1.0432794 | 2.0609071 | up | chr12:116396380-116457132 (-) // 99.27 // q24.21                                    |
| 212208_at   | <i>MED13L</i>              | 2.0607352 | 1.0431591 | 2.0607352 | up | chr2:54091205-54197787 (-) // 97.97 // p16.2                                        |
| 212219_at   | <i>PSME4</i>               | 2.0605204 | 1.0430087 | 2.0605204 | up |                                                                                     |
| 1557993_at  | <i>OTTHUMG00000176</i>     | 2.0603268 | 1.0428733 | 2.0603268 | up | chr16:81993520-81994299 (+) // 96.73 // q23.3                                       |

|              |                 |           |           |           |    |                                                 |
|--------------|-----------------|-----------|-----------|-----------|----|-------------------------------------------------|
| 228317_at    | ZFAND5          | 2.0578074 | 1.041108  | 2.0578074 | up | chr9:74978385-74979642 (+) // 85.43 // q21.13   |
| 229841_at    |                 | 2.055446  | 1.0394514 | 2.055446  | up | chr8:141532180-141532649 (+) // 93.17 // q24.3  |
| 241944_x_at  |                 | 2.054084  | 1.0384952 | 2.054084  | up | chr12:6449265-6450891 (-) // 84.1 // p13.31     |
| 211139_s_at  | NAB1            | 2.053711  | 1.0382332 | 2.053711  | up | chr2:191523883-191555139 (+) // 99.93 // q32.2  |
| 224559_at    | MALAT1          | 2.0531292 | 1.0378244 | 2.0531292 | up | chr11:65271781-65273989 (+) // 98.75 // q13.1   |
| 238357_at    |                 | 2.0524921 | 1.0373768 | 2.0524921 | up | chr20:34323111-34324424 (+) // 99.01 // q11.22  |
| 242576_x_at  |                 | 2.0520468 | 1.0370636 | 2.0520468 | up | chr13:33106971-33107608 (-) // 24.87 // q13.1   |
| 212225_at    | EIF1            | 2.0510395 | 1.0363553 | 2.0510395 | up | chr17:39845136-39847898 (+) // 97.05 // q21.2   |
| 200797_s_at  | MCL1            | 2.0505962 | 1.0360434 | 2.0505962 | up | chr1:150547032-150552247 (-) // 98.7 // q21.3   |
| 207061_at    | ERN1            | 2.0490735 | 1.0349717 | 2.0490735 | up | chr17:62120759-62207476 (-) // 97.69 // q23.3   |
| 1566079_at   | RPS16P5         | 2.047923  | 1.0341616 | 2.047923  | up | chr6:53195951-53200924 (-) // 42.73 // p12.1    |
| 214322_at    | CAMK2G          | 2.0471876 | 1.0336434 | 2.0471876 | up | chr10:75574028-75574658 (-) // 63.97 // q22.2   |
| 237813_at    | PCBP2           | 2.0456836 | 1.0325831 | 2.0456836 | up | chr12:53848638-53849053 (+) // 100.0 // q13.13  |
| 223443_s_at  | AMZ2P1          | 2.0450883 | 1.0321631 | 2.0450883 | up | chr17:62964294-62969389 (-) // 94.72 // q24.1   |
| 214337_at    | COPA            | 2.045022  | 1.0321163 | 2.045022  | up | chr1:160303217-160313044 (-) // 95.13 // q23.2  |
| 1557501_a_at |                 | 2.0445817 | 1.0318056 | 2.0445817 | up | chr1:12522784-12523641 (+) // 81.32 // p36.22   |
| 240090_at    |                 | 2.044176  | 1.0315195 | 2.044176  | up | chr9:94111143-94111883 (-) // 91.17 // q22.31   |
| 228866_at    | LOC100507918    | 2.0440676 | 1.0314429 | 2.0440676 | up | chr16:89463444-89466195 (-) // 65.51 // q24.3   |
| 224601_at    | SNHG16//SNORD10 | 2.0437388 | 1.0312109 | 2.0437388 | up | chr17:74553853-74561430 (+) // 59.46 // q25.1   |
| 225787_at    | UBE2F           | 2.0436318 | 1.0311352 | 2.0436318 | up | chr2:238875684-238951236 (+) // 92.51 // q37.3  |
| 1561813_at   | OTTHUMG00000173 | 2.0432844 | 1.03089   | 2.0432844 | up |                                                 |
| 241611_s_at  | FNDC3A          | 2.0431018 | 1.0307611 | 2.0431018 | up | chr13:49550195-49705366 (+) // 96.82 // q14.2   |
| 1565829_at   | KIAA1731        | 2.0430374 | 1.0307156 | 2.0430374 | up | chr11:93459819-93462971 (+) // 83.47 // q21     |
| 201713_s_at  | RANBP2          | 2.041728  | 1.0297906 | 2.041728  | up | chr2:109335936-109400560 (+) // 99.96 // q12.3  |
| 1565692_at   |                 | 2.0414863 | 1.0296199 | 2.0414863 | up | chr16:22424506-22426383 (-) // 22.59 // p12.2   |
| 214926_at    | SPTAN1          | 2.0409887 | 1.0292683 | 2.0409887 | up | chr9:131355046-131361983 (-) // 79.52 // q34.11 |
| 242889_x_at  | FUT8-AS1        | 2.0388982 | 1.0277897 | 2.0388982 | up | chr14:65877493-65877832 (-) // 61.96 // q23.3   |
| 232598_at    | NUP210L         | 2.0387282 | 1.0276694 | 2.0387282 | up | chr1:153965166-154029342 (-) // 97.09 // q21.3  |
| 1557325_at   |                 | 2.0386913 | 1.0276433 | 2.0386913 | up | chr19:16653433-17288017 (+) // 36.44 // p13.11  |
| 215299_x_at  | SULT1A1         | 2.038667  | 1.027626  | 2.038667  | up | chr16:28616830-28617930 (-) // 78.54 // p11.2   |
| 216721_at    | SLC25A30        | 2.0384085 | 1.0274432 | 2.0384085 | up | chr13:45976256-45983409 (+) // 55.34 // q14.13  |
| 220104_at    | ZC3HAV1         | 2.037853  | 1.02705   | 2.037853  | up | chr7:138745084-138764013 (-) // 88.98 // q34    |
| 208322_s_at  | ST3GAL1         | 2.037046  | 1.0264785 | 2.037046  | up | chr8:134471163-134488844 (-) // 85.79 // q24.22 |
| 236274_at    | EIF3B           | 2.034451  | 1.0246396 | 2.034451  | up | chr7:2406262-2406737 (+) // 91.86 // p22.3      |
| 201497_x_at  | MYH11           | 2.0333736 | 1.0238752 | 2.0333736 | up | chr16:15796993-15950868 (-) // 96.36 // p13.11  |

|              |                         |           |           |              |
|--------------|-------------------------|-----------|-----------|--------------|
| 220352_x_at  | <i>FLJ42627</i>         | 2.0318112 | 1.0227664 | 2.0318112 up |
| 235101_at    | <i>FNBP4</i>            | 2.031357  | 1.0224439 | 2.031357 up  |
| 237451_x_at  |                         | 2.0307052 | 1.0219809 | 2.0307052 up |
| 235454_at    |                         | 2.0257719 | 1.0184717 | 2.0257719 up |
| 236000_s_at  |                         | 2.0249264 | 1.0178695 | 2.0249264 up |
| 215179_x_at  | <i>PGF</i>              | 2.02475   | 1.0177437 | 2.02475 up   |
| 224091_at    |                         | 2.021995  | 1.0157795 | 2.021995 up  |
| 223527_s_at  | <i>CDADC1</i>           | 2.0217469 | 1.0156024 | 2.0217469 up |
| 217152_at    |                         | 2.0208693 | 1.0149759 | 2.0208693 up |
| 215286_s_at  | <i>PHTF2</i>            | 2.019263  | 1.0138289 | 2.019263 up  |
| 210530_s_at  | <i>NR2C1</i>            | 2.0178652 | 1.0128298 | 2.0178652 up |
| 217191_x_at  | <i>COX6CP1///COX6Cf</i> | 2.0177429 | 1.0127424 | 2.0177429 up |
| 238798_at    | <i>TAPT1</i>            | 2.0174377 | 1.0125241 | 2.0174377 up |
| 225827_at    | <i>AGO2</i>             | 2.0160842 | 1.0115559 | 2.0160842 up |
| 222169_x_at  | <i>SH2D3A</i>           | 2.0149133 | 1.0107177 | 2.0149133 up |
| 236395_at    |                         | 2.0144854 | 1.0104114 | 2.0144854 up |
| 1555039_a_at | <i>ABCC4</i>            | 2.014367  | 1.0103266 | 2.014367 up  |
|              |                         |           |           |              |
| 231106_at    | <i>BMS1P2///BMS1P6</i>  | 2.0143633 | 1.0103239 | 2.0143633 up |
| 229871_at    | <i>SAMD4B</i>           | 2.0137832 | 1.0099084 | 2.0137832 up |
| 219624_at    | <i>BAG4</i>             | 2.0135798 | 1.0097626 | 2.0135798 up |
| 206052_s_at  | <i>SLBP</i>             | 2.0135512 | 1.0097421 | 2.0135512 up |
| 219441_s_at  | <i>LRRK1</i>            | 2.0119493 | 1.0085939 | 2.0119493 up |
| 1556676_a_at | <i>OTTHUMG0000017f</i>  | 2.0102682 | 1.007388  | 2.0102682 up |
| 1559263_s_at | <i>ZC3H12D</i>          | 2.0102518 | 1.0073762 | 2.0102518 up |
|              |                         |           |           |              |
| 243960_x_at  |                         | 2.0089707 | 1.0064566 | 2.0089707 up |
| 1557316_at   |                         | 2.008408  | 1.0060524 | 2.008408 up  |
| 242287_at    | <i>CLIP1</i>            | 2.0075984 | 1.0054708 | 2.0075984 up |

chr16:2692608-2693811 (+) // 62.52 //  
p13.3///chr16:2606382-2607585 (-) // 62.44 // p13.3  
chr11:47747266-47748815 (-) // 69.05 // p11.2

chr7:26239255-26239899 (+) // 98.92 // p15.2  
chr4:83291687-83292155 (-) // 64.73 // q21.22  
chr14:75411485-75414918 (-) // 62.27 // q24.3  
chrX:108970104-108971287 (+) // 60.08 // q23  
chr13:49821889-50017239 (+) // 96.87 // q14.2  
chr17:15978220-16549265 (+) // 24.68 // p12  
chr7:77539560-77569775 (+) // 95.87 // q21.11  
chr12:95424198-95467269 (-) // 96.45 // q22  
chr16:11997779-11997994 (-) // 100.0 // p13.13  
chr4:16162127-16162700 (-) // 79.74 // p15.32  
chr8:141541241-141595411 (-) // 96.8 // q24.3  
chr19:6757340-6764591 (-) // 28.15 // p13.3  
chr5:88171900-88172437 (-) // 94.29 // q14.3  
chr13:95818476-95953589 (-) // 86.09 // q32.1  
chr10:48203312-48203788 (+) // 25.98 //  
q11.22///chr10:47225562-47226038 (-) // 25.98 //  
q11.22///chr10:49251705-49252180 (-) // 25.98 //  
q11.22///chr10:48934994-48935470 (-) // 25.36 //  
q11.22///chr10:46745236-46745709 (-) // 27.63 //  
q11.22///chr10:46354935-46355412 (-) // 27.84 //  
q11.22///chr10:51258556-51259033 (-) // 27.84 // q11.23  
chr19:39842536-39843129 (+) // 76.1 // q13.2  
chr8:38034349-38068537 (+) // 99.54 // p11.23  
chr4:1694526-1714030 (-) // 93.34 // p16.3  
chr15:101605908-101610311 (+) // 97.9 // q26.3  
chr6:109703996-109704869 (+) // 91.38 // q21  
chr6:149768764-149774306 (-) // 72.96 // q25.1  
chr7:74300573-74300921 (+) // 98.85 //  
q11.23///chr7:72470317-72470665 (+) // 98.85 //  
q11.23///chr7:74994240-74994588 (-) // 98.85 // q11.23  
chr13:99109739-99111321 (-) // 74.39 // q32.2  
chr12:122761673-122762304 (-) // 21.48 // q24.31

|            |              |           |           |           |    |                                                  |
|------------|--------------|-----------|-----------|-----------|----|--------------------------------------------------|
| 216162_at  | <i>SBNO1</i> | 2.005518  | 1.0039749 | 2.005518  | up | chr12:123808888-123810972 (+) // 64.14 // q24.31 |
| 238830_at  |              | 2.0052502 | 1.0037823 | 2.0052502 | up | chr14:50655339-50698099 (+) // 92.48 // q21.3    |
| 216161_at  | <i>SBNO1</i> | 2.0052266 | 1.0037652 | 2.0052266 | up | chr12:123808888-123810972 (-) // 64.14 // q24.31 |
| 235999_at  |              | 2.0036643 | 1.0026407 | 2.0036643 | up | chr4:83291687-83292155 (-) // 64.73 // q21.22    |
| 1559587_at | <i>SYMPK</i> | 2.003161  | 1.0022783 | 2.003161  | up | chr19:46364222-46366508 (-) // 27.0 // q13.32    |
| 233768_at  |              | 2.0005124 | 1.0003695 | 2.0005124 | up | chr6:106771385-106772656 (-) // 17.58 // q21     |
| 238920_at  |              | 2.0003223 | 1.0002325 | 2.0003223 | up | chr20:61559973-61560664 (-) // 96.9 // q13.33    |

B) Low expression genes in *TCF3-ZNF384*-positive ALL in comparison with *TCF3-PBX1*-positive ALL

# Notes : DOWN - FC ([*TCF3-ZNF384*] vs [*TCF3-PBX1*])

#Only down-regulated entities from parent entity list :

#Fold change >= 2.0

#Entity List : Moderated T-Test p (Corr) cut-off = 0.01

#Fold-Change cut-off : 2.0

# Technology : Affymetrix.GeneChip.HG-U133\_Plus\_2

# Created On : Tue Mar 08 13:31:53 JST 2016

| Probe Set ID | Gene Symbol                  | FC ([ <i>TCF3-ZNF384</i> ] vs [ <i>TCF3-PBX1</i> ]) | Log FC ([ <i>TCF3-ZNF384</i> ] vs [ <i>TCF3-PBX1</i> ]) | FC (abs) ([ <i>TCF3-ZNF384</i> ] vs [ <i>TCF3-PBX1</i> ]) | Regulation ([ <i>TCF3-ZNF384</i> ] vs [ <i>TCF3-PBX1</i> ]) | Alignments                                      |
|--------------|------------------------------|-----------------------------------------------------|---------------------------------------------------------|-----------------------------------------------------------|-------------------------------------------------------------|-------------------------------------------------|
| 227441_s_at  | <i>ANKS1B</i>                | -790.713                                            | -9.62701                                                | 790.713                                                   | down                                                        | chr12:99138036-99194959 (-) // 98.27 // q23.1   |
| 205253_at    | <i>PBX1</i>                  | -621.5123                                           | -9.279639                                               | 621.5123                                                  | down                                                        | chr1:164528936-164816309 (+) // 97.97 // q23.3  |
| 212148_at    | <i>PBX1</i>                  | -212.97679                                          | -7.7345524                                              | 212.97679                                                 | down                                                        | chr1:164816353-164821067 (+) // 91.39 // q23.3  |
| 1556598_at   | <i>ARPP21///LOC100130503</i> | -161.71909                                          | -7.337346                                               | 161.71909                                                 | down                                                        | chr3:35681195-35683573 (+) // 93.51 // p22.3    |
| 220389_at    | <i>CCDC81</i>                | -156.5544                                           | -7.29052                                                | 156.5544                                                  | down                                                        | chr11:86106223-86134150 (+) // 96.16 // q14.2   |
| 227949_at    | <i>PHACTR3</i>               | -153.29568                                          | -7.2601733                                              | 153.29568                                                 | down                                                        | chr20:58318161-58422766 (+) // 92.17 // q13.32  |
| 1556599_s_at | <i>LOC100130503</i>          | -149.82353                                          | -7.2271204                                              | 149.82353                                                 | down                                                        | chr3:35681195-35683573 (+) // 93.51 // p22.3    |
| 233882_s_at  | <i>SEMA6D</i>                | -138.39615                                          | -7.11266                                                | 138.39615                                                 | down                                                        | chr15:48058065-48064929 (+) // 97.17 // q21.1   |
| 212151_at    | <i>PBX1</i>                  | -136.15828                                          | -7.089141                                               | 136.15828                                                 | down                                                        | chr1:164816353-164821067 (+) // 91.39 // q23.3  |
| 1552960_at   | <i>LRRC15</i>                | -113.10403                                          | -6.8215065                                              | 113.10403                                                 | down                                                        | chr3:194080026-194081772 (-) // 99.54 // q29    |
| 242747_at    |                              | -110.807014                                         | -6.7919054                                              | 110.807014                                                | down                                                        |                                                 |
| 229459_at    | <i>FAM19A5</i>               | -106.012405                                         | -6.7280893                                              | 106.012405                                                | down                                                        | chr22:49147296-49147741 (+) // 97.37 // q13.32  |
| 231040_at    |                              | -105.09988                                          | -6.715617                                               | 105.09988                                                 | down                                                        | chr9:77307631-77308087 (+) // 96.6 // q21.13    |
| 242764_at    | <i>DCHS2</i>                 | -91.89154                                           | -6.52186                                                | 91.89154                                                  | down                                                        | chr4:155253536-155254604 (-) // 97.75 // q31.3  |
| 202668_at    | <i>EFNB2</i>                 | -87.611145                                          | -6.4530425                                              | 87.611145                                                 | down                                                        | chr13:107142097-107187462 (-) // 95.58 // q33.3 |

|              |                          |            |            |           |      |                                                 |
|--------------|--------------------------|------------|------------|-----------|------|-------------------------------------------------|
| 206001_at    | <i>NPY</i>               | -85.72764  | -6.4216886 | 85.72764  | down | chr7:24324859-24331416 (+) // 96.16 // p15.3    |
| 201579_at    | <i>FAT1</i>              | -85.3182   | -6.4147816 | 85.3182   | down | chr4:187508948-187644987 (-) // 99.23 // q35.2  |
| 229233_at    | <i>NRG3</i>              | -83.61894  | -6.385758  | 83.61894  | down | chr10:84745112-84746933 (+) // 96.89 // q23.1   |
| 220359_s_at  | <i>ARPP21</i>            | -82.074974 | -6.3588705 | 82.074974 | down | chr3:35721166-35727359 (+) // 96.28 // p22.3    |
| 227036_at    | <i>RASAL2</i>            | -76.14866  | -6.2507467 | 76.14866  | down | chr1:178446192-178447985 (+) // 97.31 // q25.2  |
| 203999_at    | <i>SYT1</i>              | -74.76409  | -6.2242737 | 74.76409  | down | chr12:79258566-79845782 (+) // 96.51 // q21.2   |
| 243533_x_at  |                          | -73.55733  | -6.200797  | 73.55733  | down | chr12:99438003-99438316 (-) // 96.01 // q23.1   |
| 204681_s_at  | <i>RAPGEF5</i>           | -73.03639  | -6.1905437 | 73.03639  | down | chr7:22157921-22233334 (-) // 94.41 // p15.3    |
| 231935_at    | <i>ARPP21</i>            | -70.72414  | -6.1441307 | 70.72414  | down | chr3:35731569-35835978 (+) // 97.11 // p22.3    |
| 240463_at    |                          | -67.75123  | -6.0821753 | 67.75123  | down | chr10:123990123-123990568 (+) // 38.7 // q26.13 |
| 224022_x_at  | <i>WNT16</i>             | -66.91086  | -6.0641685 | 66.91086  | down | chr7:120969089-120981157 (+) // 98.56 // q31.31 |
| 231257_at    | <i>TCERG1L</i>           | -63.32947  | -5.984805  | 63.32947  | down | chr10:132890654-132891584 (-) // 93.45 // q26.3 |
| 1559394_a_at |                          | -60.33434  | -5.9149075 | 60.33434  | down | chr1:64377384-64377813 (+) // 43.88 // p31.3    |
| 240292_x_at  | <i>ANKS1B</i>            | -57.688168 | -5.8502035 | 57.688168 | down | chr12:99137751-99138287 (-) // 99.81 // q23.1   |
| 1569796_s_at | <i>ATRNL1</i>            | -57.1679   | -5.8371334 | 57.1679   | down | chr10:116853123-116931126 (+) // 94.88 // q25.3 |
| 219564_at    | <i>KCNJ16</i>            | -55.47519  | -5.793771  | 55.47519  | down | chr17:68071425-68131744 (+) // 94.83 // q24.3   |
| 213745_at    | <i>ATRNL1</i>            | -54.68482  | -5.7730684 | 54.68482  | down | chr10:117026396-117708496 (+) // 93.98 // q25.3 |
| 214265_at    | <i>ITGA8</i>             | -54.41072  | -5.765819  | 54.41072  | down | chr10:15559087-15761656 (-) // 98.57 // p13     |
| 239964_at    | <i>TCL6</i>              | -50.20711  | -5.64982   | 50.20711  | down | chr14:96136151-96136750 (+) // 65.67 // q32.13  |
| 1563000_at   |                          | -49.86485  | -5.639951  | 49.86485  | down | chr12:99422689-99423795 (-) // 75.78 // q23.1   |
| 239650_at    | <i>NCKAP5</i>            | -49.06753  | -5.616697  | 49.06753  | down | chr2:133429372-133429887 (-) // 97.91 // q21.2  |
| 1557326_at   |                          | -47.732674 | -5.5769053 | 47.732674 | down | chr9:77109926-77112103 (-) // 91.96 // q21.13   |
| 239092_at    | <i>ITGA8</i>             | -46.02038  | -5.524201  | 46.02038  | down | chr10:15638513-15646269 (-) // 88.85 // p13     |
| 230432_at    | <i>LOC100422737</i>      | -45.96395  | -5.522431  | 45.96395  | down | chr6:107165327-107235300 (-) // 58.19 // q21    |
| 213909_at    | <i>LRRC15</i>            | -44.444126 | -5.473921  | 44.444126 | down | chr3:194075976-194079165 (-) // 92.08 // q29    |
| 213005_s_at  | <i>KANK1</i>             | -42.996944 | -5.4261622 | 42.996944 | down | chr9:676887-746103 (+) // 99.21 // p24.3        |
| 228956_at    | <i>UGT8</i>              | -42.345943 | -5.404152  | 42.345943 | down | chr4:115597646-115599380 (+) // 91.08 // q26    |
| 203695_s_at  | <i>DFNA5</i>             | -42.03901  | -5.3936567 | 42.03901  | down | chr7:24737974-24797363 (-) // 99.42 // p15.3    |
| 213358_at    | <i>SOGA2</i>             | -40.521114 | -5.340602  | 40.521114 | down | chr18:8783685-8832776 (+) // 96.73 // p11.22    |
| 226492_at    | <i>SEMA6D</i>            | -39.23071  | -5.2939115 | 39.23071  | down | chr15:48061683-48066420 (+) // 97.4 // q21.1    |
| 230603_at    | <i>COL27A1</i>           | -38.60788  | -5.2708235 | 38.60788  | down | chr9:116929966-116930894 (+) // 91.15 // q32    |
| 230671_at    | <i>CTD-2083E4.7//OT1</i> | -37.95015  | -5.2460337 | 37.95015  | down | chr5:195892-196458 (+) // 98.77 // p15.33       |
| 212077_at    | <i>CALD1</i>             | -36.84546  | -5.203415  | 36.84546  | down | chr7:134653998-134655470 (+) // 96.14 // q33    |
| 219989_s_at  | <i>ANKS1B</i>            | -36.51086  | -5.1902537 | 36.51086  | down | chr12:99129070-99548509 (-) // 97.03 // q23.1   |
| 220373_at    | <i>DCHS2</i>             | -35.74703  | -5.1597514 | 35.74703  | down | chr4:155155526-155161977 (-) // 99.16 // q31.3  |
| 205780_at    | <i>BIK</i>               | -35.26799  | -5.1402874 | 35.26799  | down | chr22:43519630-43525717 (+) // 68.15 // q13.2   |

|             |                   |            |            |           |      |                                                 |
|-------------|-------------------|------------|------------|-----------|------|-------------------------------------------------|
| 1552722_at  | ARPP21            | -34.711723 | -5.117351  | 34.711723 | down | chr3:35722428-35726283 (+) // 94.39 // p22.3    |
| 231223_at   | CSMD1             | -34.593456 | -5.112427  | 34.593456 | down | chr8:2792875-2793277 (-) // 97.34 // p23.2      |
| 232289_at   | KCNJ12///LOC10099 | -34.300343 | -5.100151  | 34.300343 | down | chr17:21320481-21323181 (+) // 96.44 // p11.2   |
| 205805_s_at | ROR1              | -34.015625 | -5.0881257 | 34.015625 | down | chr1:64239713-64644707 (+) // 98.93 // p31.3    |
| 218625_at   | NRN1              | -33.611538 | -5.0708847 | 33.611538 | down | chr6:5998234-6007150 (-) // 92.57 // p25.1      |
| 208358_s_at | UGT8              | -32.747032 | -5.0332923 | 32.747032 | down | chr4:115519909-115597486 (+) // 99.21 // q26    |
| 203435_s_at | MME               | -32.57247  | -5.0255814 | 32.57247  | down | chr3:154797633-154901492 (+) // 88.53 // q25.2  |
| 213273_at   | TENM4             | -32.024548 | -5.0011063 | 32.024548 | down | chr11:78364327-78380208 (-) // 95.31 // q14.1   |
| 1559459_at  | LOC613266         | -31.829748 | -4.992304  | 31.829748 | down | chr20:15872980-15874922 (-) // 70.54 // p12.1   |
| 227439_at   | ANKS1B            | -31.796711 | -4.9908056 | 31.796711 | down | chr12:99138036-99194959 (-) // 98.27 // q23.1   |
| 202178_at   | PRKCZ             | -31.353848 | -4.9705706 | 31.353848 | down | chr1:1982069-2116826 (+) // 99.45 // p36.33     |
| 204462_s_at | SLC16A2           | -31.22918  | -4.964823  | 31.22918  | down | chrX:73641084-73753751 (+) // 94.6 // q13.2     |
| 234985_at   | LDLRAD3           | -30.778967 | -4.943873  | 30.778967 | down | chr11:36251772-36253697 (+) // 93.97 // p13     |
| 244280_at   | LOC100507254      | -30.292072 | -4.9208684 | 30.292072 | down | chr6:132455550-132490502 (+) // 98.23 // q23.2  |
| 231042_s_at |                   | -30.178299 | -4.9154396 | 30.178299 | down | chr4:114374777-114375242 (+) // 76.14 // q26    |
| 1566646_at  | LOC149086         | -30.064924 | -4.9100094 | 30.064924 | down | chr1:31971896-31974166 (-) // 49.91 // p35.2    |
| 203434_s_at | MME               | -29.885363 | -4.901367  | 29.885363 | down | chr3:154797633-154901492 (+) // 88.06 // q25.2  |
| 225019_at   | CAMK2D            | -29.766298 | -4.895608  | 29.766298 | down | chr4:114373569-114683202 (-) // 88.24 // q26    |
| 225288_at   | COL27A1           | -29.397444 | -4.877619  | 29.397444 | down | chr9:117069690-117074794 (+) // 94.39 // q32    |
| 219840_s_at | TCL6              | -29.345438 | -4.8750644 | 29.345438 | down | chr14:96131198-96135702 (+) // 77.11 // q32.13  |
| 202796_at   | SYNPO             | -28.76092  | -4.846038  | 28.76092  | down | chr5:150020252-150038769 (+) // 92.22 // q33.1  |
| 202733_at   | P4HA2             | -28.587776 | -4.8373265 | 28.587776 | down | chr5:131528302-131562559 (-) // 98.81 // q31.1  |
| 202669_s_at | EFNB2             | -28.482372 | -4.8319974 | 28.482372 | down | chr13:107144619-107187315 (-) // 98.26 // q33.3 |
| 235099_at   | CMTM8             | -28.168055 | -4.815988  | 28.168055 | down | chr3:32398903-32411811 (+) // 98.85 // p22.3    |
| 239691_at   | C12orf77          | -28.008034 | -4.807769  | 28.008034 | down | chr12:25146366-25146845 (-) // 51.02 // p12.1   |
| 209569_x_at | NSG1              | -26.940454 | -4.7517023 | 26.940454 | down | chr4:4388495-4420785 (+) // 90.23 // p16.3      |
| 1568611_at  |                   | -26.905777 | -4.749844  | 26.905777 | down | chr5:131525836-131527060 (-) // 12.33 // q31.1  |
| 221113_s_at | WNT16             | -26.62766  | -4.7348537 | 26.62766  | down | chr7:120965420-120979512 (+) // 99.11 // q31.31 |
| 210094_s_at | PARD3             | -26.278687 | -4.7158213 | 26.278687 | down | chr10:34601191-35104211 (-) // 93.05 // p11.21  |
| 210032_s_at | SPAG6             | -25.742989 | -4.6861076 | 25.742989 | down | chr10:22634415-22706539 (+) // 98.58 // p12.2   |
| 216364_s_at | AFF2              | -25.00742  | -4.6442842 | 25.00742  | down | chrX:147582617-148072862 (+) // 96.67 // q28    |
| 227440_at   | ANKS1B            | -24.991934 | -4.6433907 | 24.991934 | down | chr12:99138036-99194959 (-) // 98.27 // q23.1   |
| 244306_at   |                   | -24.842901 | -4.634762  | 24.842901 | down |                                                 |
| 236854_at   | LINC00494         | -24.568586 | -4.618743  | 24.568586 | down | chr20:46998720-46999381 (+) // 26.76 // q13.13  |
| 205120_s_at | SGCB              | -24.431944 | -4.610697  | 24.431944 | down | chr4:52889863-52899808 (-) // 97.45 // q12      |
| 203998_s_at | SYT1              | -24.221727 | -4.59823   | 24.221727 | down | chr12:79258566-79845782 (+) // 96.51 // q21.2   |



|              |                    |            |            |           |      |                                                  |
|--------------|--------------------|------------|------------|-----------|------|--------------------------------------------------|
| 207781_s_at  | ZNF711             | -23.979288 | -4.583717  | 23.979288 | down | chrX:84499089-84526927 (+) // 80.87 // q21.1     |
| 225548_at    | LOC100996628///SH  | -23.520887 | -4.5558705 | 23.520887 | down | chr4:77660882-77701305 (+) // 99.65 // q21.1     |
| 240448_at    |                    | -23.347761 | -4.5452123 | 23.347761 | down | chr18:8821582-8821930 (+) // 82.34 // p11.22     |
| 1554340_a_at | DRAXIN///LOC10099  | -23.012287 | -4.5243325 | 23.012287 | down | chr1:11769390-11780631 (+) // 64.91 // p36.22    |
| 210473_s_at  | GPR125             | -22.994057 | -4.523189  | 22.994057 | down | chr4:22389006-22403181 (-) // 49.47 // p15.2     |
| 1569122_at   |                    | -22.896452 | -4.517052  | 22.896452 | down | chr14:105998191-106000652 (+) // 82.33 // q32.33 |
| 243526_at    | WDR86              | -22.890875 | -4.5167007 | 22.890875 | down | chr7:151078209-151078505 (-) // 96.42 // q36.1   |
| 230249_at    | KHDRBS3            | -22.71081  | -4.505307  | 22.71081  | down | chr8:136659900-136668927 (+) // 97.48 // q24.23  |
| 1564253_at   | LOC285766          | -22.542803 | -4.494595  | 22.542803 | down | chr6:181465-205484 (-) // 81.22 // p25.3         |
| 201617_x_at  | CALD1              | -22.185852 | -4.471568  | 22.185852 | down | chr7:134464400-134654097 (+) // 93.18 // q33     |
| 208567_s_at  | KCNJ12///KCNJ18/// | -22.073776 | -4.4642615 | 22.073776 | down | chr17:21318654-21319956 (+) // 96.38 // p11.2    |
| 210033_s_at  | SPAG6              | -22.01831  | -4.460632  | 22.01831  | down | chr10:22634415-22706536 (+) // 99.96 // p12.2    |
| 221526_x_at  | PARD3              | -21.999775 | -4.459417  | 21.999775 | down | chr10:34398488-35104211 (-) // 95.5 // p11.22    |
| 225688_s_at  | PHLDB2             | -21.776804 | -4.4447203 | 21.776804 | down | chr3:111667804-111695136 (+) // 95.89 // q13.2   |
| 227733_at    | TMEM63C            | -21.721056 | -4.4410224 | 21.721056 | down | chr14:77647974-77725838 (+) // 97.89 // q24.3    |
| 1563494_at   |                    | -21.458206 | -4.4234576 | 21.458206 | down | chr10:83668583-83673960 (+) // 61.42 // q23.1    |
| 202206_at    | ARL4C              | -21.340042 | -4.415491  | 21.340042 | down | chr2:235401681-235405622 (-) // 95.42 // q37.1   |
| 236173_s_at  | LRIG1              | -21.326511 | -4.414576  | 21.326511 | down | chr3:66465369-66550708 (+) // 98.19 // p14.1     |
| 231793_s_at  | CAMK2D             | -21.271376 | -4.4108415 | 21.271376 | down | chr4:114375269-114682224 (-) // 99.84 // q26     |
| 235401_s_at  | FCRLA              | -21.200542 | -4.406029  | 21.200542 | down | chr1:161677037-161683566 (+) // 87.32 // q23.3   |
| 234261_at    |                    | -21.043764 | -4.395321  | 21.043764 | down | chr12:99258022-99260721 (-) // 27.84 // q23.1    |
| 238451_at    | MPP7               | -20.959148 | -4.3895082 | 20.959148 | down | chr10:28340816-28342114 (-) // 98.01 // p12.1    |
| 242385_at    | RORB               | -20.716684 | -4.372721  | 20.716684 | down | chr9:77303200-77303514 (+) // 100.0 // q21.13    |
| 236773_at    |                    | -20.342365 | -4.3464155 | 20.342365 | down | chr20:15866461-15866858 (-) // 41.44 // p12.1    |
| 230896_at    | BEND4              | -20.176117 | -4.3345766 | 20.176117 | down | chr4:42112869-42113898 (-) // 99.81 // p13       |
| 1559221_at   | LOC100507254       | -20.150732 | -4.3327603 | 20.150732 | down | chr6:132455117-132468196 (+) // 72.8 // q23.2    |
| 231183_s_at  |                    | -19.911629 | -4.3155394 | 19.911629 | down | chr20:10618612-10619665 (+) // 94.42 // p12.2    |
| 209781_s_at  | KHDRBS3            | -19.68829  | -4.299266  | 19.68829  | down | chr8:136469759-136659485 (+) // 91.46 // q24.23  |
| 235666_at    | ITGA8              | -19.373438 | -4.276008  | 19.373438 | down | chr10:15555950-15556389 (-) // 97.54 // p13      |
| 239657_x_at  | FOXO6///FOXO6      | -19.3708   | -4.2758117 | 19.3708   | down | chr1:41848960-41849262 (+) // 96.46 // p34.2     |
| 229247_at    | FBLN7              | -19.347158 | -4.2740498 | 19.347158 | down | chr2:112940379-112945899 (+) // 96.16 // q13     |
| 211525_s_at  | GP5                | -18.97434  | -4.245978  | 18.97434  | down | chr3:194115549-194119083 (-) // 78.52 // q29     |
| 235400_at    | FCRLA              | -18.53226  | -4.211967  | 18.53226  | down | chr1:161677037-161683566 (+) // 87.32 // q23.3   |
| 222901_s_at  | KCNJ16             | -18.38941  | -4.2008033 | 18.38941  | down | chr17:68071425-68129813 (+) // 95.26 // q24.3    |
| 215721_at    | IGHG1              | -18.072994 | -4.1757636 | 18.072994 | down | chr14:107034162-107035220 (-) // 98.58 // q32.33 |
| 224994_at    | CAMK2D             | -18.035162 | -4.1727405 | 18.035162 | down | chr4:114373569-114683202 (-) // 88.24 // q26     |

|              |                          |             |            |            |      |                                                     |
|--------------|--------------------------|-------------|------------|------------|------|-----------------------------------------------------|
| 1559732_at   | <i>NUB1</i>              | -17.993525  | -4.169406  | 17.993525  | down | chr7:151068973-151071697 (-) // 93.02 // q36.1      |
| 223475_at    | <i>CRISPLD1</i>          | -17.732124  | -4.1482935 | 17.732124  | down | chr8:75897111-75945532 (+) // 100.0 // q21.11       |
| 206413_s_at  | <i>TCL1B</i>             | -17.516352  | -4.1306305 | 17.516352  | down | chr14:96152777-96158965 (+) // 97.74 // q32.13      |
| 230306_at    | <i>VPS26B</i>            | -17.468142  | -4.126654  | 17.468142  | down | chr11:134114787-134115623 (+) // 95.92 // q25       |
| 204114_at    | <i>NID2</i>              | -17.27275   | -4.110426  | 17.27275   | down | chr14:52471527-52535712 (-) // 98.36 // q22.1       |
| 202341_s_at  | <i>TRIM2</i>             | -17.065863  | -4.0930414 | 17.065863  | down | chr4:154125589-154260469 (+) // 96.49 // q31.3      |
| 1553722_s_at | <i>RNF152</i>            | -17.039232  | -4.0907884 | 17.039232  | down | chr18:59480572-59560304 (-) // 97.83 // q21.33      |
| 228555_at    | <i>CAMK2D</i>            | -16.97507   | -4.0853457 | 16.97507   | down | chr4:114372189-114373421 (-) // 43.5 // q26         |
| 220911_s_at  | <i>NYNRIN</i>            | -16.942247  | -4.0825534 | 16.942247  | down | chr14:24868204-24888488 (+) // 91.57 // q12         |
| 226244_at    | <i>CLEC14A</i>           | -16.784353  | -4.069045  | 16.784353  | down | chr14:38723314-38724524 (-) // 92.12 // q21.1       |
| 204730_at    | <i>RIMS3</i>             | -16.780338  | -4.0687    | 16.780338  | down | chr1:41086351-41131324 (-) // 95.4 // p34.2         |
| 238778_at    | <i>MPP7</i>              | -16.705757  | -4.0622735 | 16.705757  | down | chr10:28339921-28340418 (-) // 100.0 // p12.1       |
| 225293_at    | <i>COL27A1</i>           | -16.550156  | -4.048773  | 16.550156  | down | chr9:117069690-117074794 (+) // 94.39 // q32        |
| 225855_at    | <i>EPB41L5</i>           | -16.524208  | -4.0465093 | 16.524208  | down | chr2:120834601-120936695 (+) // 97.71 // q14.2      |
| 210450_at    | <i>IGHV5-78</i>          | -16.435081  | -4.038707  | 16.435081  | down | chr14:107258712-107259792 (-) // 93.79 // q32.33    |
|              |                          |             |            |            |      | chr2:90259773-90260299 (+) // 100.0 //              |
| 216517_at    | <i>IGKC</i>              | -16.378761  | -4.0337543 | 16.378761  | down | p11.2//chr2:89291876-89292403 (-) // 96.02 // p11.2 |
| 202289_s_at  | <i>TACC2</i>             | -15.886484  | -3.989728  | 15.886484  | down | chr10:123923358-124014053 (+) // 98.59 // q26.13    |
| 207819_s_at  | <i>ABCB4</i>             | -15.793666  | -3.9812741 | 15.793666  | down | chr7:87031360-87106865 (-) // 75.92 // q21.12       |
| 238419_at    | <i>PHLDB2</i>            | -15.7059145 | -3.973236  | 15.7059145 | down | chr3:111603488-111667886 (+) // 99.06 // q13.2      |
| 230951_at    | <i>EPB41L5</i>           | -15.678053  | -3.9706745 | 15.678053  | down | chr2:120864031-120864491 (+) // 97.87 // q14.2      |
| 1558368_s_at | <i>DRAXIN//LOC10099</i>  | -15.599151  | -3.9633956 | 15.599151  | down | chr1:11751780-11786209 (+) // 76.21 // p36.22       |
| 212224_at    | <i>ALDH1A1</i>           | -15.597738  | -3.963265  | 15.597738  | down | chr9:75515586-75567971 (-) // 97.58 // q21.13       |
| 244210_at    | <i>CTC-436K13.5//OT1</i> | -15.407867  | -3.9455953 | 15.407867  | down | chr5:157600608-157600814 (-) // 79.33 // q33.3      |
| 202207_at    | <i>ARL4C</i>             | -15.406968  | -3.945511  | 15.406968  | down | chr2:235401681-235405622 (-) // 95.42 // q37.1      |
| 202479_s_at  | <i>TRIB2</i>             | -14.651685  | -3.8729947 | 14.651685  | down | chr2:12857947-12881530 (+) // 98.7 // p24.3         |
| 1566647_s_at | <i>LOC149086</i>         | -14.649051  | -3.8727353 | 14.649051  | down | chr1:31971896-31974166 (+) // 49.91 // p35.2        |
| 1564821_at   |                          | -14.601208  | -3.8680158 | 14.601208  | down | chr10:129991025-129991879 (-) // 30.63 // q26.2     |
| 211913_s_at  | <i>MERTK</i>             | -14.158551  | -3.8236017 | 14.158551  | down | chr2:112733019-112779973 (+) // 40.76 // q13        |
| 202517_at    | <i>CRMP1</i>             | -14.146128  | -3.8223352 | 14.146128  | down | chr4:5822514-5890143 (-) // 99.89 // p16.2          |
| 1555626_a_at | <i>SLAMF1</i>            | -14.144543  | -3.8221736 | 14.144543  | down | chr1:160579968-160617085 (-) // 86.13 // q23.3      |
| 204975_at    | <i>EMP2</i>              | -13.948008  | -3.8019872 | 13.948008  | down | chr16:10626643-10641537 (-) // 99.28 // p13.13      |
| 210957_s_at  | <i>AFF2</i>              | -13.853803  | -3.79221   | 13.853803  | down | chrX:147582243-148075954 (+) // 97.25 // q28        |
| 218949_s_at  | <i>QRSL1</i>             | -13.6848755 | -3.7745104 | 13.6848755 | down | chr6:107077458-107114235 (+) // 84.73 // q21        |
| 203151_at    | <i>MAP1A</i>             | -13.684178  | -3.774437  | 13.684178  | down | chr15:43812837-43823817 (+) // 97.18 // q15.3       |
| 227676_at    | <i>FAM3D</i>             | -13.669808  | -3.772921  | 13.669808  | down | chr3:58619669-58622147 (-) // 94.85 // p14.2        |

|              |           |            |            |           |      |                                                |
|--------------|-----------|------------|------------|-----------|------|------------------------------------------------|
| 225483_at    | VPS26B    | -13.59996  | -3.7655306 | 13.59996  | down | chr11:134116715-134117684 (+) // 95.54 // q25  |
| 235911_at    | MFI2      | -13.534925 | -3.758615  | 13.534925 | down | chr3:196728610-196729068 (-) // 99.57 // q29   |
| 218948_at    | QRSL1     | -13.523279 | -3.757373  | 13.523279 | down | chr6:107077452-107115410 (+) // 75.55 // q21   |
| 206255_at    | BLK       | -13.335648 | -3.737216  | 13.335648 | down | chr8:11351879-11422107 (+) // 95.7 // p23.1    |
| 207926_at    | GP5       | -13.320652 | -3.7355928 | 13.320652 | down | chr3:194114983-194120234 (-) // 58.06 // q29   |
| 229292_at    | EPB41L5   | -13.209787 | -3.7235353 | 13.209787 | down | chr2:120862124-120862688 (+) // 93.23 // q14.2 |
| 202914_s_at  | ARHGEF11  | -12.995822 | -3.699976  | 12.995822 | down | chr1:156905315-157014865 (-) // 99.08 // q23.1 |
| 235310_at    | GCSAM     | -12.892692 | -3.6884816 | 12.892692 | down | chr3:111841065-111852084 (-) // 77.15 // q13.2 |
| 228584_at    | SGCB      | -12.884983 | -3.6876187 | 12.884983 | down | chr4:52888131-52889279 (-) // 89.13 // q12     |
| 201615_x_at  | CALD1     | -12.821411 | -3.680483  | 12.821411 | down | chr7:134464375-134654691 (+) // 94.06 // q33   |
| 1557098_s_at | HAR1A     | -12.814384 | -3.6796923 | 12.814384 | down | chr20:61733559-61735737 (+) // 89.14 // q13.33 |
| 216223_at    | CPN2      | -12.709495 | -3.6678348 | 12.709495 | down | chr3:194060742-194063353 (-) // 73.52 // q29   |
| 224685_at    | MLLT4     | -12.704893 | -3.6673124 | 12.704893 | down | chr6:168276116-168372703 (+) // 94.46 // q27   |
| 235372_at    | FCRLA     | -12.670944 | -3.6634521 | 12.670944 | down | chr1:161683165-161684141 (+) // 42.96 // q23.3 |
| 223062_s_at  | PSAT1     | -12.61294  | -3.6568327 | 12.61294  | down | chr9:80912058-80945007 (+) // 97.98 // q21.2   |
| 1564308_a_at | MPP7      | -12.496888 | -3.643497  | 12.496888 | down | chr10:28342991-28527666 (-) // 93.52 // p12.1  |
| 226828_s_at  | HEYL      | -12.484645 | -3.642083  | 12.484645 | down | chr1:40089664-40091006 (-) // 68.12 // p34.3   |
| 228988_at    | ZNF711    | -12.456985 | -3.638883  | 12.456985 | down | chrX:84527506-84528404 (+) // 99.89 // q21.1   |
| 1559827_at   | LINC00960 | -12.429102 | -3.6356502 | 12.429102 | down | chr3:75721432-75722390 (+) // 33.33 // p12.3   |
| 213419_at    | APBB2     | -12.399842 | -3.6322498 | 12.399842 | down | chr4:40816613-41016240 (-) // 94.26 // p14     |
| 202478_at    | TRIB2     | -12.246227 | -3.6142654 | 12.246227 | down | chr2:12857207-12882856 (+) // 99.24 // p24.3   |
| 217968_at    | TSSC1     | -12.054679 | -3.5915213 | 12.054679 | down | chr2:3192742-3381598 (-) // 97.54 // p25.3     |
| 209789_at    | CORO2B    | -12.030805 | -3.5886612 | 12.030805 | down | chr15:68871574-69020140 (+) // 87.83 // q23    |
| 206181_at    | SLAMF1    | -11.991713 | -3.5839658 | 11.991713 | down | chr1:160579888-160616869 (-) // 99.83 // q23.3 |
| 1566690_at   |           | -11.942297 | -3.5780084 | 11.942297 | down | chr14:95979374-95981481 (+) // 71.37 // q32.13 |
| 237495_at    | MPP7      | -11.934361 | -3.5770495 | 11.934361 | down | chr10:28525534-28527629 (-) // 79.66 // p12.1  |
| 210517_s_at  | AKAP12    | -11.901079 | -3.5730205 | 11.901079 | down | chr6:151646822-151677908 (+) // 99.97 // q25.1 |
| 207894_s_at  | TCL6      | -11.848226 | -3.5665991 | 11.848226 | down | chr14:96129592-96139789 (+) // 62.43 // q32.13 |
| 239427_at    | SLAMF1    | -11.604255 | -3.536582  | 11.604255 | down | chr1:160577895-160578565 (-) // 96.4 // q23.3  |
| 213759_at    | ARL4C     | -11.582241 | -3.5338426 | 11.582241 | down | chr2:235404422-235404995 (+) // 88.48 // q37.1 |
| 227530_at    | AKAP12    | -11.569577 | -3.5322642 | 11.569577 | down | chr6:151678864-151679671 (+) // 83.78 // q25.1 |
| 39318_at     | TCL1A     | -11.53747  | -3.528255  | 11.53747  | down | chr14:96176303-96180450 (-) // 98.02 // q32.13 |
| 209099_x_at  | JAG1      | -11.491785 | -3.522531  | 11.491785 | down | chr20:10618624-10654590 (-) // 96.99 // p12.2  |
| 219179_at    | DACT1     | -11.41489  | -3.512845  | 11.41489  | down | chr14:59112081-59115036 (+) // 99.09 // q23.1  |
| 221349_at    | VPREB1    | -11.368214 | -3.5069337 | 11.368214 | down | chr22:22599225-22599749 (+) // 90.41 // q11.22 |
| 231095_at    |           | -11.326104 | -3.5015798 | 11.326104 | down | chr17:65671127-65671746 (-) // 95.4 // q24.2   |

|              |                 |             |            |            |      |                                                  |
|--------------|-----------------|-------------|------------|------------|------|--------------------------------------------------|
| 1558217_at   | SLFN13          | -11.282938  | -3.4960709 | 11.282938  | down | chr17:33766002-33774435 (-) // 75.62 // q12      |
| 226796_at    | ABHD15          | -11.275633  | -3.4951365 | 11.275633  | down | chr17:27887690-27889792 (-) // 85.78 // q11.2    |
| 209098_s_at  | JAG1            | -11.19752   | -3.4851074 | 11.19752   | down | chr20:10619318-10654545 (-) // 96.89 // p12.2    |
| 216268_s_at  | JAG1            | -11.1602545 | -3.480298  | 11.1602545 | down | chr20:10618629-10625628 (-) // 97.61 // p12.2    |
| 213712_at    | ELOVL2          | -11.041653  | -3.4648843 | 11.041653  | down | chr6:10980994-10982303 (-) // 92.52 // p24.2     |
| 203846_at    | TRIM32          | -11.024758  | -3.462675  | 11.024758  | down | chr9:119449608-119463028 (+) // 99.33 // q33.1   |
| 1552923_a_at | PITPNM2         | -10.941455  | -3.4517326 | 10.941455  | down | chr12:123468980-123519201 (-) // 98.02 // q24.31 |
| 238339_x_at  | LRIG1           | -10.932671  | -3.450574  | 10.932671  | down | chr3:66463369-66550708 (-) // 97.5 // p14.1      |
| 219271_at    | GALNT14         | -10.907799  | -3.447288  | 10.907799  | down | chr2:31133333-31361013 (-) // 96.03 // p23.1     |
| 221624_at    | TCL6            | -10.801991  | -3.4332254 | 10.801991  | down | chr14:96136775-96144437 (+) // 60.11 // q32.13   |
| 239178_at    | FGF9            | -10.764015  | -3.4281445 | 10.764015  | down | chr13:22277427-22278133 (+) // 100.0 // q12.11   |
| 232950_s_at  | PITPNM2         | -10.651712  | -3.4130135 | 10.651712  | down | chr12:123468027-123485692 (-) // 98.79 // q24.31 |
| 1553423_a_at | SLFN13          | -10.625495  | -3.4094582 | 10.625495  | down | chr17:33766493-33775783 (-) // 78.16 // q12      |
| 209183_s_at  | C10orf10        | -10.603911  | -3.4065247 | 10.603911  | down | chr10:45471710-45474257 (-) // 92.88 // q11.21   |
| 227336_at    | DTX1            | -10.583109  | -3.4036915 | 10.583109  | down | chr12:113495494-113535830 (+) // 91.82 // q24.13 |
| 204867_at    | GCHFR           | -10.572207  | -3.4022048 | 10.572207  | down | chr15:41056284-41059911 (+) // 100.0 // q15.1    |
| 209995_s_at  | TCL1A           | -10.515064  | -3.3943858 | 10.515064  | down | chr14:96176394-96180445 (-) // 98.46 // q32.13   |
| 211596_s_at  | LRIG1           | -10.314173  | -3.3665562 | 10.314173  | down | chr3:66429221-66551351 (-) // 97.86 // p14.1     |
| 1566081_at   | DLEU7           | -10.264714  | -3.3596215 | 10.264714  | down | chr13:51285143-51289621 (-) // 42.28 // q14.3    |
| 1553405_a_at | CSMD1           | -10.249098  | -3.357425  | 10.249098  | down | chr8:2795620-4852223 (-) // 99.35 // p23.2       |
| 227529_s_at  | AKAP12          | -10.245529  | -3.3569226 | 10.245529  | down | chr6:151678864-151679671 (+) // 83.78 // q25.1   |
| 1562984_at   | OTTHUMG00000170 | -10.193988  | -3.3496466 | 10.193988  | down | chr12:99487136-99498787 (+) // 41.36 // q23.1    |
| 206679_at    | APBA1           | -10.132761  | -3.3409555 | 10.132761  | down | chr9:72045201-72287197 (-) // 95.58 // q21.11    |
| 227846_at    | GPR176          | -10.0532255 | -3.3295865 | 10.0532255 | down | chr15:40091222-40092816 (-) // 97.81 // q14      |
| 201616_s_at  | CALD1           | -9.982529   | -3.3194053 | 9.982529   | down | chr7:134464375-134654691 (+) // 94.06 // q33     |
| 214643_x_at  | BIN1            | -9.972528   | -3.3179593 | 9.972528   | down | chr2:127805669-127864519 (-) // 94.85 // q14.3   |
| 235721_at    | DTX3            | -9.799694   | -3.2927368 | 9.799694   | down | chr12:58003197-58003585 (+) // 90.66 // q13.3    |
| 204760_s_at  | NR1D1///THRA    | -9.784719   | -3.2905304 | 9.784719   | down | chr17:38249040-38256973 (-) // 98.19 // q21.1    |
| 219522_at    | FJX1            | -9.759237   | -3.2867684 | 9.759237   | down | chr11:35640054-35642412 (+) // 94.89 // p13      |
| 1555122_at   | GPR125          | -9.715487   | -3.2802863 | 9.715487   | down | chr4:22415816-22444758 (-) // 97.33 // p15.2     |
| 210948_s_at  | LEF1            | -9.669136   | -3.273387  | 9.669136   | down | chr4:108984784-109088923 (-) // 99.61 // q25     |
| 236820_at    |                 | -9.647483   | -3.2701526 | 9.647483   | down | chr8:11363370-11363859 (+) // 68.66 // p23.1     |
| 241933_at    | QRSL1           | -9.601883   | -3.2633173 | 9.601883   | down | chr6:107115667-107116287 (+) // 68.36 // q21     |
| 230128_at    | CKAP2           | -9.487989   | -3.2461023 | 9.487989   | down | chr22:23230013-23232345 (+) // 64.14 // q11.22   |
| 223468_s_at  | RGMA            | -9.474787   | -3.2440934 | 9.474787   | down | chr15:93586646-93632257 (-) // 98.63 // q26.1    |
| 209151_x_at  | TCF3            | -9.375874   | -3.2289531 | 9.375874   | down | chr19:1609291-1650291 (-) // 94.42 // p13.3      |

|             |                         |            |            |           |      |                                                  |
|-------------|-------------------------|------------|------------|-----------|------|--------------------------------------------------|
| 226864_at   | <i>PKIA</i>             | -9.322761  | -3.2207572 | 9.322761  | down | chr8:79515459-79517502 (+) // 79.25 // q21.12    |
| 201710_at   | <i>MYBL2</i>            | -9.227546  | -3.205947  | 9.227546  | down | chr20:42302444-42345124 (+) // 94.4 // q13.12    |
| 221054_s_at | <i>TCL6</i>             | -9.203271  | -3.2021468 | 9.203271  | down | chr14:96129592-96137824 (+) // 49.19 // q32.13   |
| 228281_at   | <i>C11orf82</i>         | -9.168301  | -3.1966543 | 9.168301  | down | chr11:82644381-82645697 (+) // 96.02 // q14.1    |
| 205489_at   | <i>CRYM</i>             | -9.144211  | -3.1928587 | 9.144211  | down | chr16:21269838-21289602 (-) // 99.52 // p12.2    |
| 1558522_at  |                         | -9.106399  | -3.1868806 | 9.106399  | down | chr7:24727870-24729673 (+) // 74.41 // p15.3     |
| 215238_s_at | <i>DOCK9</i>            | -9.102992  | -3.1863408 | 9.102992  | down | chr13:99512435-99549864 (-) // 99.87 // q32.3    |
| 208302_at   | <i>HMHB1</i>            | -9.098131  | -3.1855702 | 9.098131  | down | chr5:143191725-143200282 (+) // 84.38 // q31.3   |
| 204682_at   | <i>LTBP2</i>            | -9.061406  | -3.179735  | 9.061406  | down | chr14:74966457-75079034 (-) // 99.49 // q24.3    |
| 229770_at   | <i>GLT1D1</i>           | -9.040578  | -3.176415  | 9.040578  | down | chr12:129468994-129469507 (+) // 92.27 // q24.33 |
| 209570_s_at | <i>NSG1</i>             | -9.016744  | -3.1726065 | 9.016744  | down | chr4:4388765-4420784 (+) // 98.67 // p16.3       |
| 214432_at   | <i>ATP1A3</i>           | -9.016222  | -3.172523  | 9.016222  | down | chr19:42470735-42498367 (-) // 98.06 // q13.2    |
| 225078_at   | <i>EMP2</i>             | -8.728351  | -3.125709  | 8.728351  | down | chr16:10622279-10623791 (-) // 81.39 // p13.13   |
| 226743_at   | <i>SLFN11</i>           | -8.727441  | -3.1255586 | 8.727441  | down | chr17:33677330-33680006 (-) // 68.21 // q12      |
| 223595_at   | <i>TMEM133</i>          | -8.724801  | -3.1251223 | 8.724801  | down | chr11:100862810-100864665 (+) // 98.4 // q22.1   |
| 1557128_at  | <i>FAM111B</i>          | -8.659967  | -3.1143615 | 8.659967  | down | chr11:58874666-58892476 (+) // 90.65 // q12.1    |
| 235182_at   | <i>ISM1</i>             | -8.641939  | -3.111355  | 8.641939  | down | chr20:13280345-13281298 (+) // 98.45 // p12.1    |
| 205159_at   | <i>CSF2RB</i>           | -8.636456  | -3.1104393 | 8.636456  | down | chr22:37318075-37336481 (+) // 88.72 // q12.3    |
| 212985_at   | <i>APBB2</i>            | -8.633923  | -3.110016  | 8.633923  | down | chr4:40812044-40816814 (-) // 79.15 // p14       |
| 238823_at   | <i>FMNL3</i>            | -8.616959  | -3.1071787 | 8.616959  | down | chr12:50031722-50033098 (-) // 45.48 // q13.12   |
| 219218_at   | <i>BAHCC1</i>           | -8.6104965 | -3.1060965 | 8.6104965 | down | chr17:79431356-79433351 (+) // 98.57 // q25.3    |
| 223693_s_at | <i>RADIL</i>            | -8.570498  | -3.099379  | 8.570498  | down | chr7:4838813-4856985 (-) // 97.94 // p22.1       |
| 209909_s_at | <i>TGFB2</i>            | -8.531506  | -3.0928004 | 8.531506  | down | chr1:218519576-218615478 (+) // 97.12 // q41     |
| 242468_at   |                         | -8.512857  | -3.0896435 | 8.512857  | down | chr20:15877195-15877936 (-) // 70.61 // p12.1    |
| 227230_s_at | <i>KIAA1211</i>         | -8.5088825 | -3.0889697 | 8.5088825 | down | chr4:57180759-57196774 (+) // 93.22 // q12       |
| 219432_at   | <i>EVC</i>              | -8.486894  | -3.0852365 | 8.486894  | down | chr4:5712923-5830772 (+) // 87.64 // p16.2       |
| 206660_at   | <i>IGLL1</i>            | -8.468661  | -3.082134  | 8.468661  | down | chr22:23915363-23922495 (-) // 99.88 // q11.23   |
| 202208_s_at | <i>ARL4C</i>            | -8.395933  | -3.0696907 | 8.395933  | down | chr2:235403805-235405204 (-) // 94.67 // q37.1   |
| 207362_at   | <i>SLC30A4</i>          | -8.355121  | -3.0626607 | 8.355121  | down | chr15:45777102-45814552 (-) // 98.33 // q21.1    |
| 240915_at   | <i>IGHV1-69</i>         | -8.315151  | -3.0557425 | 8.315151  | down | chr14:107169512-107169902 (-) // 57.36 // q32.33 |
| 238477_at   | <i>KIF1C</i>            | -8.274342  | -3.0486445 | 8.274342  | down | chr17:4930676-4931696 (+) // 44.55 // p13.2      |
| 213610_s_at | <i>KLHL23///PHOSPHC</i> | -8.267704  | -3.0474868 | 8.267704  | down | chr2:170606859-170608394 (+) // 48.07 // q31.1   |
| 215391_at   | <i>MAP1A</i>            | -8.223054  | -3.0396743 | 8.223054  | down | chr15:43814544-43815779 (-) // 88.21 // q15.3    |
| 243084_at   | <i>CALD1</i>            | -8.218341  | -3.0388472 | 8.218341  | down | chr7:134619974-134620671 (+) // 99.14 // q33     |
| 205769_at   | <i>SLC27A2</i>          | -8.209663  | -3.037323  | 8.209663  | down | chr15:50474421-50528570 (+) // 99.11 // q21.2    |
| 206546_at   | <i>SYCP2</i>            | -8.1551    | -3.0277026 | 8.1551    | down | chr20:58439007-58497481 (-) // 99.42 // q13.33   |

|              |                        |            |            |           |      |
|--------------|------------------------|------------|------------|-----------|------|
| 205122_at    | <i>MSANTD3-TMEFF1/</i> | -8.0853615 | -3.0153122 | 8.0853615 | down |
| 206999_at    | <i>IL12RB2</i>         | -8.06895   | -3.0123808 | 8.06895   | down |
| 1559049_a_at | <i>OTTHUMG0000017/</i> | -8.018907  | -3.0034056 | 8.018907  | down |
| 207497_s_at  | <i>MS4A2</i>           | -7.980911  | -2.9965534 | 7.980911  | down |
| 221557_s_at  | <i>LEF1</i>            | -7.9771214 | -2.9958682 | 7.9771214 | down |
| 228737_at    | <i>TOX2</i>            | -7.9378448 | -2.9887474 | 7.9378448 | down |
| 238029_s_at  | <i>SLC16A14</i>        | -7.934347  | -2.9881115 | 7.934347  | down |
| 236678_at    |                        | -7.9223375 | -2.9859262 | 7.9223375 | down |
| 231455_at    | <i>LINC00487</i>       | -7.9147224 | -2.9845388 | 7.9147224 | down |
| 1562945_at   |                        | -7.9108715 | -2.9838367 | 7.9108715 | down |
| 1554789_a_at | <i>PDE8B</i>           | -7.899187  | -2.9817042 | 7.899187  | down |
| 212538_at    | <i>DOCK9</i>           | -7.8544736 | -2.9735146 | 7.8544736 | down |
| 216986_s_at  | <i>IRF4</i>            | -7.8363996 | -2.970191  | 7.8363996 | down |
| 212970_at    | <i>APBB2</i>           | -7.836336  | -2.9701793 | 7.836336  | down |
| 231067_s_at  | <i>AKAP12</i>          | -7.7796507 | -2.9597054 | 7.7796507 | down |
| 204326_x_at  | <i>MT1X</i>            | -7.658072  | -2.9369812 | 7.658072  | down |
| 235699_at    | <i>REM2</i>            | -7.6471376 | -2.9349198 | 7.6471376 | down |
| 215574_at    |                        | -7.6394577 | -2.9334702 | 7.6394577 | down |
| 241416_at    |                        | -7.634194  | -2.9324758 | 7.634194  | down |
| 207996_s_at  | <i>LDLRAD4</i>         | -7.6127763 | -2.9284227 | 7.6127763 | down |
| 212789_at    | <i>NCAPD3</i>          | -7.58882   | -2.9238756 | 7.58882   | down |
| 229997_at    | <i>VANGL1</i>          | -7.572136  | -2.9207003 | 7.572136  | down |
| 227231_at    | <i>KIAA1211</i>        | -7.4681473 | -2.9007504 | 7.4681473 | down |
| 222051_s_at  | <i>OTTHUMG0000016/</i> | -7.347202  | -2.877195  | 7.347202  | down |
| 1555060_a_at | <i>IKZF2</i>           | -7.323448  | -2.872523  | 7.323448  | down |
| 229775_s_at  | <i>MLLT4</i>           | -7.263123  | -2.86059   | 7.263123  | down |
| 234910_at    | <i>RASAL2</i>          | -7.2604237 | -2.8600538 | 7.2604237 | down |
| 1556472_s_at | <i>SCML4</i>           | -7.2444987 | -2.856886  | 7.2444987 | down |
| 220068_at    | <i>VPREB3</i>          | -7.2340918 | -2.854812  | 7.2340918 | down |
| 1554717_a_at | <i>PDE4D</i>           | -7.2171474 | -2.8514287 | 7.2171474 | down |
| 1554732_at   | <i>LOC728175</i>       | -7.162908  | -2.8405454 | 7.162908  | down |
| 204262_s_at  | <i>PSEN2</i>           | -7.1599765 | -2.8399549 | 7.1599765 | down |
| 232406_at    |                        | -7.079191  | -2.8235846 | 7.079191  | down |
| 213954_at    | <i>FAM169A</i>         | -7.0704904 | -2.8218102 | 7.0704904 | down |
| 220407_s_at  | <i>TGFB2</i>           | -7.0669413 | -2.821086  | 7.0669413 | down |
| 225079_at    | <i>EMP2</i>            | -7.0618806 | -2.8200524 | 7.0618806 | down |

chr9:103235812-103339917 (+) // 89.9 // q31.1  
chr1:67773046-67862583 (+) // 90.1 // p31.3  
chr17:79374889-79376876 (+) // 99.55 // q25.3  
chr11:59856188-59863238 (+) // 100.0 // q12.1  
chr4:108968703-109089635 (-) // 95.79 // q25  
chr20:42697295-42698252 (+) // 91.85 // q13.12  
chr2:230899690-230900173 (-) // 96.41 // q36.3  
chr20:10649745-10650195 (+) // 96.15 // p12.2  
chr2:6869299-6869779 (-) // 8.02 // p25.2

chr5:76506750-76722458 (+) // 98.7 // q13.3  
chr13:99445742-99554696 (-) // 99.43 // q32.3  
chr6:391767-407616 (+) // 99.94 // p25.3  
chr4:40812044-40816814 (-) // 79.15 // p14  
chr6:151678865-151679337 (-) // 96.33 // q25.1  
chr16:56716400-56718107 (+) // 87.71 // q13  
chr14:23356323-23356887 (+) // 96.4 // q11.2  
chr11:79134602-79136342 (-) // 37.59 // q14.1  
chr7:150101543-150102000 (-) // 66.01 // q36.1  
chr18:13620866-13652753 (+) // 99.49 // p11.21  
chr11:134022339-134093868 (-) // 98.79 // q25  
chr1:116227911-116234041 (+) // 75.18 // p13.1  
chr4:57180759-57196774 (+) // 93.22 // q12  
chr8:86089717-86126135 (-) // 94.09 // q21.2  
chr2:213871896-214016333 (-) // 98.27 // q34  
chr6:168227670-168272970 (-) // 87.99 // q27  
chr1:178421571-178442657 (-) // 100.0 // q25.2  
chr6:108025307-108145521 (-) // 99.58 // q21  
chr22:24094933-24096592 (-) // 84.49 // q11.23  
chr5:58452914-59064462 (-) // 96.54 // q11.2  
chr4:185261995-185275130 (-) // 37.43 // q35.1  
chr1:227058959-227083797 (+) // 94.28 // q42.13  
chr20:10640235-10643958 (-) // 79.51 // p12.2  
chr5:74075458-74162615 (-) // 99.77 // q13.3  
chr1:218519867-218614973 (+) // 96.99 // q41  
chr16:10622279-10623791 (-) // 81.39 // p13.13



|              |                |            |            |           |      |                                                      |
|--------------|----------------|------------|------------|-----------|------|------------------------------------------------------|
| 1559072_a_at | <i>ELFN2</i>   | -6.9859185 | -2.8044498 | 6.9859185 | down | chr22:37763999-37771579 (-) // 93.56 // q13.1        |
| 201518_at    | <i>CBX1</i>    | -6.9423184 | -2.7954175 | 6.9423184 | down | chr17:46147422-46178800 (-) // 97.16 // q21.32       |
| 220892_s_at  | <i>PSAT1</i>   | -6.8436027 | -2.774756  | 6.8436027 | down | chr9:80912093-80944059 (+) // 99.81 //               |
| 238674_at    |                | -6.828368  | -2.7715409 | 6.828368  | down | q21.2///chr1:79520572-79521773 (-) // 95.68 // p31.1 |
| 220489_s_at  | <i>SERINC2</i> | -6.8241005 | -2.770639  | 6.8241005 | down | chr14:107167628-107168721 (-) // 98.37 // q32.33     |
| 210991_s_at  | <i>RIMS3</i>   | -6.757485  | -2.7564864 | 6.757485  | down | chr1:31901758-31903357 (-) // 60.85 // p35.2         |
| 211840_s_at  | <i>PDE4D</i>   | -6.6787615 | -2.7395806 | 6.6787615 | down | chr1:41091886-41131116 (-) // 95.86 // p34.2         |
| 206404_at    | <i>FGF9</i>    | -6.6697164 | -2.7376254 | 6.6697164 | down | chr5:58270481-58334937 (-) // 99.89 // q11.2         |
| 222449_at    | <i>PMEPA1</i>  | -6.594576  | -2.7212799 | 6.594576  | down | chr13:22245874-22276184 (+) // 93.66 // q12.11       |
| 201397_at    | <i>PHGDH</i>   | -6.5930395 | -2.7209437 | 6.5930395 | down | chr20:56223453-56285627 (-) // 97.32 // q13.31       |
| 219213_at    | <i>JAM2</i>    | -6.5301285 | -2.7071114 | 6.5301285 | down | chr1:120254545-120286836 (+) // 75.59 // p12         |
| 204491_at    | <i>PDE4D</i>   | -6.527818  | -2.706601  | 6.527818  | down | chr21:27011931-27087092 (+) // 95.71 // q21.3        |
| 221234_s_at  | <i>BACH2</i>   | -6.5204697 | -2.7049758 | 6.5204697 | down | chr5:58265853-59189621 (-) // 93.05 // q11.2         |
| 214978_s_at  | <i>PPFIA4</i>  | -6.5172215 | -2.704257  | 6.5172215 | down | chr6:90636247-91006461 (-) // 96.74 // q15           |
| 205429_s_at  | <i>MPP6</i>    | -6.5085583 | -2.702338  | 6.5085583 | down | chr1:203024706-203047863 (+) // 97.84 // q32.1       |
| 211819_s_at  | <i>SORBS1</i>  | -6.5016704 | -2.7008104 | 6.5016704 | down | chr7:24613023-24727497 (+) // 93.92 // p15.3         |
| 40148_at     | <i>APBB2</i>   | -6.4810886 | -2.6962361 | 6.4810886 | down | chr10:97074815-97197313 (-) // 98.14 // q24.1        |
| 218980_at    | <i>FHOD3</i>   | -6.4776864 | -2.6954787 | 6.4776864 | down | chr4:40817320-41016240 (-) // 88.64 // p14           |
| 201689_s_at  | <i>TPD52</i>   | -6.45655   | -2.6907635 | 6.45655   | down | chr18:34298551-34360018 (+) // 99.0 // q12.2         |
| 235221_at    | <i>CBLN3</i>   | -6.448621  | -2.6889906 | 6.448621  | down | chr8:80947571-81083777 (-) // 97.78 // q21.13        |
| 204562_at    | <i>IRF4</i>    | -6.440258  | -2.6871185 | 6.440258  | down | chr14:24895746-24897135 (-) // 96.05 // q12          |
| 210837_s_at  | <i>PDE4D</i>   | -6.4163675 | -2.6817567 | 6.4163675 | down | chr6:391759-411193 (+) // 94.65 // p25.3             |
| 236085_at    | <i>CAPSL</i>   | -6.4081526 | -2.6799085 | 6.4081526 | down | chr5:58269598-58335339 (-) // 99.5 // q11.2          |
| 204857_at    | <i>MAD1L1</i>  | -6.376243  | -2.6727066 | 6.376243  | down | chr5:35904399-35938737 (-) // 98.57 // p13.2         |
| 204947_at    | <i>E2F1</i>    | -6.312552  | -2.6582234 | 6.312552  | down | chr7:1855433-2270273 (-) // 93.25 // p22.3           |
| 1569154_a_at |                | -6.298494  | -2.655007  | 6.298494  | down | chr20:32263488-32274193 (-) // 94.77 // q11.22       |
| 235582_at    | <i>E2F2</i>    | -6.2863865 | -2.652231  | 6.2863865 | down | chr22:47077605-47078653 (+) // 58.01 // q13.31       |
| 228632_at    | <i>MEG9</i>    | -6.2357826 | -2.6405706 | 6.2357826 | down | chr1:23833616-23834800 (-) // 72.66 // p36.12        |
| 1553380_at   | <i>PARP15</i>  | -6.235659  | -2.640542  | 6.235659  | down | chr14:101536342-101539271 (+) // 83.53 // q32.31     |
| 207042_at    | <i>E2F2</i>    | -6.234538  | -2.6402826 | 6.234538  | down | chr3:122334524-122355536 (+) // 98.42 // q21.1       |
| 223891_at    | <i>KCNQ5</i>   | -6.1820574 | -2.628087  | 6.1820574 | down | chr1:23836347-23857712 (-) // 99.94 // p36.12        |
| 1569542_at   |                | -6.180809  | -2.6277957 | 6.180809  | down | chr6:73331808-73905303 (+) // 98.73 // q13           |
| 219306_at    | <i>KIF15</i>   | -6.154072  | -2.6215413 | 6.154072  | down | chr4:22399163-22400525 (-) // 13.72 // p15.2         |
| 215041_s_at  | <i>DOCK9</i>   | -6.1230597 | -2.6142528 | 6.1230597 | down | chr3:44803284-44894743 (+) // 99.54 // p21.31        |
| 244623_at    | <i>KCNQ5</i>   | -6.1063046 | -2.6102996 | 6.1063046 | down | chr13:99540765-99738647 (-) // 97.39 // q32.3        |
|              |                |            |            |           |      | chr6:73908065-73908580 (+) // 100.0 // q13           |

|              |                 |            |            |           |      |                                                  |
|--------------|-----------------|------------|------------|-----------|------|--------------------------------------------------|
| 210836_x_at  | <i>PDE4D</i>    | -6.079997  | -2.6040707 | 6.079997  | down | chr5:58269514-59064438 (-) // 99.13 // q11.2     |
| 243362_s_at  | <i>LEF1-AS1</i> | -6.075898  | -2.6030977 | 6.075898  | down | chr4:109096864-109097582 (+) // 94.35 // q25     |
| 209760_at    | <i>KIAA0922</i> | -6.075393  | -2.6029778 | 6.075393  | down | chr4:154505985-154557775 (+) // 97.57 // q31.3   |
| 235834_at    | <i>CALD1</i>    | -6.0609736 | -2.5995495 | 6.0609736 | down | chr7:134619559-134620015 (+) // 55.52 // q33     |
| 202931_x_at  | <i>BIN1</i>     | -6.038985  | -2.594306  | 6.038985  | down | chr2:127805602-127864565 (-) // 97.5 // q14.3    |
| 226017_at    | <i>CMTM7</i>    | -6.038778  | -2.5942566 | 6.038778  | down | chr3:32433363-32496333 (+) // 96.96 // p22.3     |
| 218792_s_at  | <i>BSPRY</i>    | -6.0016675 | -2.5853634 | 6.0016675 | down | chr9:116116544-116133504 (+) // 78.18 // q32     |
| 204612_at    | <i>PKIA</i>     | -5.9988155 | -2.5846777 | 5.9988155 | down | chr8:79428335-79515449 (+) // 97.39 // q21.12    |
| 225619_at    | <i>SLAIN1</i>   | -5.959767  | -2.5752559 | 5.959767  | down | chr13:78272469-78338366 (+) // 96.33 // q22.3    |
| 1562937_at   |                 | -5.953937  | -2.573844  | 5.953937  | down | chr4:187543069-187544347 (-) // 61.8 // q35.2    |
| 239471_at    | <i>LRRC28</i>   | -5.9537954 | -2.5738096 | 5.9537954 | down | chr15:99930374-99930932 (+) // 91.68 // q26.3    |
| 1564310_a_at | <i>PARP15</i>   | -5.950339  | -2.5729718 | 5.950339  | down | chr3:122313370-122354886 (+) // 99.8 // q21.1    |
| 1552924_a_at | <i>PITPNM2</i>  | -5.9146357 | -2.5642893 | 5.9146357 | down | chr12:123468980-123519201 (-) // 98.02 // q24.31 |
| 218421_at    | <i>CERK</i>     | -5.910096  | -2.5631816 | 5.910096  | down | chr22:47080307-47082909 (-) // 87.59 // q13.31   |
| 232676_x_at  | <i>MYEF2</i>    | -5.9093003 | -2.5629873 | 5.9093003 | down | chr15:48433992-48444449 (-) // 98.41 // q21.1    |
| 220977_x_at  | <i>EPB41L5</i>  | -5.818801  | -2.540722  | 5.818801  | down | chr2:120770652-120933437 (+) // 98.74 // q14.2   |
| 1557129_a_at | <i>FAM111B</i>  | -5.8099847 | -2.5385344 | 5.8099847 | down | chr11:58874666-58892476 (+) // 90.65 // q12.1    |
| 214781_at    |                 | -5.8077493 | -2.5379791 | 5.8077493 | down | chr3:126748885-126753574 (+) // 72.81 // q21.3   |
| 222771_s_at  | <i>MYEF2</i>    | -5.782531  | -2.531701  | 5.782531  | down | chr15:48432009-48470550 (-) // 89.23 // q21.1    |
| 203264_s_at  | <i>ARHGEF9</i>  | -5.773244  | -2.5293822 | 5.773244  | down | chrX:62854847-62974993 (-) // 97.65 // q11.1     |
| 235039_x_at  | <i>LIN9</i>     | -5.754864  | -2.524782  | 5.754864  | down | chr1:226419076-226426736 (-) // 95.18 // q42.12  |
| 227975_at    | <i>GPRIN1</i>   | -5.749278  | -2.5233808 | 5.749278  | down | chr5:176022802-176024027 (-) // 92.76 // q35.2   |
| 201333_s_at  | <i>ARHGEF12</i> | -5.747441  | -2.5229197 | 5.747441  | down | chr11:120276823-120360645 (+) // 97.31 // q23.3  |
| 226890_at    | <i>WDR35</i>    | -5.718373  | -2.5156047 | 5.718373  | down | chr2:20110023-20160359 (-) // 99.23 // p24.1     |
| 222996_s_at  | <i>CXXC5</i>    | -5.7070713 | -2.5127506 | 5.7070713 | down | chr5:139060058-139062686 (+) // 93.87 // q31.2   |
| 227423_at    | <i>LRRC28</i>   | -5.6948404 | -2.5096555 | 5.6948404 | down | chr15:99796100-99926908 (+) // 98.04 // q26.3    |
| 224666_at    | <i>NSMCE1</i>   | -5.6940727 | -2.509461  | 5.6940727 | down | chr16:27236320-27268903 (-) // 82.95 // p12.1    |
| 1554628_at   | <i>ZNF57</i>    | -5.678232  | -2.505442  | 5.678232  | down | chr19:2900943-2918472 (+) // 98.93 // p13.3      |
| 238101_at    | <i>BEND4</i>    | -5.6735377 | -2.5042486 | 5.6735377 | down | chr4:42145567-42146014 (+) // 89.22 // p13       |
| 201272_at    | <i>AKR1B1</i>   | -5.6716247 | -2.503762  | 5.6716247 | down | chr7:134127108-134143858 (-) // 99.93 // q33     |
| 221558_s_at  | <i>LEF1</i>     | -5.6620293 | -2.5013192 | 5.6620293 | down | chr4:108968700-109089578 (-) // 96.98 // q25     |
| 212161_at    | <i>AP2A2</i>    | -5.6606135 | -2.5009584 | 5.6606135 | down | chr11:925862-1012240 (+) // 98.96 // p15.5       |
| 238649_at    | <i>PITPNC1</i>  | -5.6475434 | -2.4976234 | 5.6475434 | down | chr17:65690708-65691597 (+) // 99.0 // q24.2     |
| 230486_at    |                 | -5.6443377 | -2.4968042 | 5.6443377 | down | chr21:47352908-47353562 (+) // 99.09 // q22.3    |
| 222513_s_at  | <i>SORBS1</i>   | -5.6318417 | -2.4936068 | 5.6318417 | down | chr10:97071530-97321135 (-) // 96.59 // q24.1    |
| 206975_at    | <i>LTA</i>      | -5.6193647 | -2.490407  | 5.6193647 | down | chr6:31540092-31542098 (+) // 98.27 // p21.33    |



|              |                   |            |            |           |      |                                                      |
|--------------|-------------------|------------|------------|-----------|------|------------------------------------------------------|
| 224363_at    | LOC100996685      | -5.6169496 | -2.4897869 | 5.6169496 | down | chr2:133874576-133876622 (+) // 65.81 // q21.2       |
| 215621_s_at  | IGHD              | -5.6008797 | -2.4856534 | 5.6008797 | down | chr14:106311786-106725679 (-) // 89.24 // q32.33     |
| 225080_at    | MYO1C             | -5.5958843 | -2.4843662 | 5.5958843 | down | chr17:1367394-1368446 (-) // 52.88 // p13.3          |
| 1569225_a_at | SCML4             | -5.5744195 | -2.4788215 | 5.5744195 | down | chr6:108025874-108053600 (-) // 94.28 // q21         |
| 209558_s_at  | HIP1R             | -5.5662227 | -2.4766986 | 5.5662227 | down | chr12:123335801-123347507 (+) // 99.95 // q24.31     |
| 228377_at    | KLHL14            | -5.555152  | -2.4738264 | 5.555152  | down | chr18:30252635-30352974 (-) // 96.19 // q12.1        |
| 1552364_s_at | MSI2              | -5.5460086 | -2.4714499 | 5.5460086 | down | chr17:55333894-55757695 (+) // 95.65 // q22          |
| 208581_x_at  | MT1X              | -5.5381575 | -2.4694061 | 5.5381575 | down | chr16:56716381-56717961 (+) // 99.61 // q13          |
| 222746_s_at  | BSPRY             | -5.5264688 | -2.466358  | 5.5264688 | down | chr9:116111821-116133507 (+) // 77.39 // q32         |
| 236270_at    | NFATC4            | -5.5264187 | -2.4663448 | 5.5264187 | down | chr14:24848008-24848805 (+) // 70.58 // q12          |
| 236443_at    |                   | -5.5250816 | -2.4659958 | 5.5250816 | down | chr9:37030537-37031409 (+) // 82.59 // p13.2         |
| 1560503_a_at | LOC100130275      | -5.5234747 | -2.4655762 | 5.5234747 | down | chr6:10414299-10416190 (+) // 95.03 // p24.3         |
| 217025_s_at  | DBN1              | -5.515591  | -2.4635155 | 5.515591  | down | chr5:176884232-176900199 (-) // 94.18 // q35.3       |
| 220999_s_at  | CYFIP2            | -5.474521  | -2.4527328 | 5.474521  | down | chr5:156820983-156822592 (+) // 90.45 // q33.3       |
| 210201_x_at  | BIN1              | -5.463436  | -2.4498086 | 5.463436  | down | chr2:127805611-127864690 (-) // 98.06 // q14.3       |
| 211151_x_at  | GH1               | -5.4486938 | -2.4459105 | 5.4486938 | down | chr17:61994578-61996154 (-) // 100.0 // q23.3        |
| 1566954_at   |                   | -5.445739  | -2.4451277 | 5.445739  | down | chr7:22281822-22282583 (-) // 61.24 // p15.3         |
| 243363_at    | LEF1-AS1          | -5.4448304 | -2.4448872 | 5.4448304 | down | chr4:109096864-109097582 (+) // 94.35 // q25         |
| 205798_at    | IL7R              | -5.435509  | -2.4424152 | 5.435509  | down | chr5:35857057-35876844 (+) // 98.55 // p13.2         |
|              |                   |            |            |           |      | chr17:61994562-61996198 (-) // 99.81 //              |
|              |                   |            |            |           |      | q23.3//chr17:61957574-61959223 (-) // 96.46 // q23.3 |
| 208069_x_at  | CSH1///CSHL1///GH | -5.4340696 | -2.442033  | 5.4340696 | down | chr21:35893369-35895562 (-) // 99.01 // q22.12       |
| 215253_s_at  | RCAN1             | -5.4040785 | -2.4340487 | 5.4040785 | down | chr12:123320050-123347500 (+) // 91.86 // q24.31     |
| 38340_at     | HIP1R             | -5.3809056 | -2.427849  | 5.3809056 | down | chr18:52889564-52890004 (-) // 96.28 // q21.2        |
| 228837_at    | TCF4              | -5.3612804 | -2.4225776 | 5.3612804 | down | chr11:128561568-128562721 (-) // 95.04 // q24.3      |
| 239641_at    | FLI1-AS1          | -5.358012  | -2.4216979 | 5.358012  | down | chr5:139028517-139062926 (+) // 96.41 // q31.2       |
| 233955_x_at  | CXXC5             | -5.3520813 | -2.4201    | 5.3520813 | down | chr1:23832921-23833838 (-) // 85.7 // p36.12         |
| 228361_at    | E2F2              | -5.350749  | -2.419741  | 5.350749  | down | chr17:59759984-59940755 (-) // 93.53 // q23.2        |
| 221703_at    | BRIP1             | -5.344993  | -2.418188  | 5.344993  | down | chr6:161411349-161412022 (-) // 65.19 // q26         |
| 238623_at    |                   | -5.322706  | -2.41216   | 5.322706  | down | chr19:37407356-37441838 (+) // 98.43 // q13.12       |
| 1564356_at   | ZNF568            | -5.307686  | -2.408083  | 5.307686  | down | chrX:23093707-23096495 (+) // 98.87 //               |
|              |                   |            |            |           |      | p22.11//chr7:120988906-121036341 (-) // 97.54 //     |
|              |                   |            |            |           |      | q31.31                                               |
| 201889_at    | FAM3C             | -5.291263  | -2.4036121 | 5.291263  | down | chr3:194407700-194409764 (+) // 96.05 // q29         |
| 227410_at    | FAM43A            | -5.2850976 | -2.40193   | 5.2850976 | down | chr6:26250422-26250833 (-) // 100.0 // p22.2         |
| 208506_at    | HIST1H3A///HIST1H | -5.281985  | -2.4010801 | 5.281985  | down | chr11:120276823-120360645 (+) // 97.31 // q23.3      |
| 201334_s_at  | ARHGEF12          | -5.2782326 | -2.400055  | 5.2782326 | down |                                                      |

|             |                      |            |            |           |      |                                                  |
|-------------|----------------------|------------|------------|-----------|------|--------------------------------------------------|
| 203222_s_at | <i>TLE1</i>          | -5.2714534 | -2.3982008 | 5.2714534 | down | chr9:84199098-84303181 (-) // 99.19 // q21.32    |
| 210202_s_at | <i>BIN1</i>          | -5.256853  | -2.3941994 | 5.256853  | down | chr2:127805906-127864540 (-) // 98.55 // q14.3   |
| 204504_s_at | <i>HIRIP3</i>        | -5.2524986 | -2.393004  | 5.2524986 | down | chr16:30004316-30007316 (-) // 96.88 // p11.2    |
| 204790_at   | <i>SMAD7</i>         | -5.248966  | -2.3920333 | 5.248966  | down | chr18:46446223-46477081 (-) // 87.34 // q21.1    |
| 36499_at    | <i>CELSR2</i>        | -5.236568  | -2.3886216 | 5.236568  | down | chr1:109794571-109818373 (+) // 78.27 // p13.3   |
| 231929_at   | <i>IKZF2</i>         | -5.233718  | -2.3878362 | 5.233718  | down | chr2:213864421-213867171 (-) // 90.3 // q34      |
| 223652_at   | <i>AS3MT</i>         | -5.2265296 | -2.3858533 | 5.2265296 | down | chr10:104629272-104661653 (+) // 98.21 // q24.32 |
| 39729_at    | <i>PRDX2</i>         | -5.2184143 | -2.3836114 | 5.2184143 | down | chr19:12907636-12912662 (-) // 75.2 // p13.2     |
| 214439_x_at | <i>BIN1</i>          | -5.1927543 | -2.3765    | 5.1927543 | down | chr2:127805618-127864914 (-) // 91.01 // q14.3   |
| 213586_at   | <i>CDKN2D</i>        | -5.1898828 | -2.375702  | 5.1898828 | down | chr19:10677135-10679437 (+) // 98.77 // p13.2    |
| 218229_s_at | <i>POGK</i>          | -5.1832204 | -2.3738487 | 5.1832204 | down | chr1:166822480-166823448 (+) // 99.28 // q24.1   |
| 238526_at   | <i>RAB3IP</i>        | -5.166527  | -2.3691947 | 5.166527  | down | chr12:70210358-70211237 (+) // 75.54 // q15      |
| 234343_s_at | <i>RASAL2</i>        | -5.142721  | -2.362532  | 5.142721  | down | chr1:178421571-178442657 (+) // 100.0 // q25.2   |
| 202786_at   | <i>STK39</i>         | -5.1392384 | -2.3615546 | 5.1392384 | down | chr2:168810530-169104105 (-) // 94.99 // q24.3   |
| 213947_s_at | <i>NUP210</i>        | -5.136585  | -2.3608096 | 5.136585  | down | chr3:13357734-13358343 (-) // 99.18 // p25.1     |
| 205297_s_at | <i>CD79B</i>         | -5.117033  | -2.3553076 | 5.117033  | down | chr17:62006099-62009714 (-) // 99.84 // q23.3    |
| 219752_at   | <i>RASAL1</i>        | -5.0920296 | -2.3482409 | 5.0920296 | down | chr12:113537317-113574021 (-) // 99.14 // q24.13 |
| 224516_s_at | <i>CXXC5</i>         | -5.0846972 | -2.3461618 | 5.0846972 | down | chr5:139027945-139063465 (+) // 94.22 // q31.2   |
| 204240_s_at | <i>SMC2</i>          | -5.0822086 | -2.3454556 | 5.0822086 | down | chr9:106856606-106901937 (+) // 98.22 // q31.1   |
| 220567_at   | <i>IKZF2</i>         | -5.079919  | -2.3448055 | 5.079919  | down | chr2:213871343-214015058 (-) // 98.84 // q34     |
| 46142_at    | <i>LMF1</i>          | -5.077059  | -2.343993  | 5.077059  | down | chr16:904501-920808 (-) // 93.39 // p13.3        |
| 211825_s_at | <i>FLI1</i>          | -5.065793  | -2.3407881 | 5.065793  | down | chr22:29668203-29683125 (+) // 54.72 // q12.2    |
| 203263_s_at | <i>ARHGEF9</i>       | -5.0598617 | -2.339098  | 5.0598617 | down | chrX:62854847-62974993 (-) // 97.44 // q11.1     |
| 218689_at   | <i>FANCF</i>         | -5.0452414 | -2.3349233 | 5.0452414 | down | chr11:22644443-22647369 (-) // 85.89 // p14.3    |
| 209994_s_at | <i>ABCB1///ABCB4</i> | -5.034282  | -2.3317862 | 5.034282  | down | chr7:87133325-87230183 (-) // 99.93 // q21.12    |
| 238455_at   |                      | -5.027126  | -2.3297338 | 5.027126  | down | chr10:20569316-20570205 (+) // 94.97 // p12.31   |
| 212611_at   | <i>DTX4</i>          | -5.0198646 | -2.3276484 | 5.0198646 | down | chr11:58939752-58976057 (+) // 95.27 // q12.1    |
| 201690_s_at | <i>TPD52</i>         | -5.0166087 | -2.3267124 | 5.0166087 | down | chr8:80947571-81083777 (-) // 97.78 // q21.13    |
| 218087_s_at | <i>SORBS1</i>        | -5.0134797 | -2.3258123 | 5.0134797 | down | chr10:97071530-97321135 (-) // 99.43 // q24.1    |
| 225235_at   | <i>TSPAN17</i>       | -5.004261  | -2.323157  | 5.004261  | down | chr5:176074423-176086052 (+) // 76.37 // q35.2   |
| 219148_at   | <i>PBK</i>           | -4.9552803 | -2.3089666 | 4.9552803 | down | chr8:27667412-27695300 (-) // 98.77 // p21.1     |
| 225233_at   | <i>MSI2</i>          | -4.9539723 | -2.308586  | 4.9539723 | down | chr17:55693354-55760253 (+) // 94.4 // q22       |
| 203045_at   | <i>NINJ1</i>         | -4.9469    | -2.3065248 | 4.9469    | down | chr9:95883781-95896519 (-) // 92.22 // q22.31    |
| 225731_at   | <i>ANKRD50</i>       | -4.9305334 | -2.3017437 | 4.9305334 | down | chr4:125585205-125593585 (-) // 93.91 // q28.1   |
| 211456_x_at | <i>MT1HL1</i>        | -4.9149437 | -2.297175  | 4.9149437 | down | chr1:237167402-237167718 (-) // 99.37 // q43     |
| 1560754_at  | <i>CMTM7</i>         | -4.9145093 | -2.2970474 | 4.9145093 | down | chr3:32433187-32435264 (+) // 87.69 // p22.3     |

|              |                       |            |            |           |      |                                                    |
|--------------|-----------------------|------------|------------|-----------|------|----------------------------------------------------|
| 207221_at    | <i>F2RL3</i>          | -4.885019  | -2.2883642 | 4.885019  | down | chr19:16999825-17009516 (+) // 58.18 // p13.11     |
| 220266_s_at  | <i>KLF4</i>           | -4.8802333 | -2.28695   | 4.8802333 | down | chr9:110247994-110251929 (-) // 99.59 // q31.2     |
| 1557375_at   |                       | -4.8777537 | -2.286217  | 4.8777537 | down | chr4:5817190-5820015 (+) // 40.32 // p16.2         |
| 205768_s_at  | <i>SLC27A2</i>        | -4.8684154 | -2.2834523 | 4.8684154 | down | chr15:50474421-50528570 (+) // 99.11 // q21.2      |
| 204925_at    | <i>CTNS</i>           | -4.839696  | -2.2749164 | 4.839696  | down | chr17:3540015-3564832 (+) // 99.85 // p13.2        |
| 205081_at    | <i>CRIP1</i>          | -4.8343587 | -2.2733245 | 4.8343587 | down | chr14:105953596-105955027 (+) // 100.0 // q32.33   |
| 202094_at    | <i>BIRC5</i>          | -4.831796  | -2.2725596 | 4.831796  | down | chr17:76210322-76221715 (+) // 95.94 // q25.3      |
| 230740_at    | <i>EHD3</i>           | -4.7994857 | -2.2628798 | 4.7994857 | down | chr2:31491850-31492316 (+) // 75.61 // p23.1       |
| 229464_at    | <i>MYEF2</i>          | -4.7978697 | -2.262394  | 4.7978697 | down | chr15:48431468-48432134 (-) // 78.98 // q21.1      |
| 227130_s_at  | <i>TLE1</i>           | -4.7754335 | -2.2556317 | 4.7754335 | down | chr9:84205813-84225212 (+) // 93.23 // q21.32      |
| 1556425_a_at | <i>LOC284219</i>      | -4.773684  | -2.255103  | 4.773684  | down | chr18:8765373-8767754 (+) // 98.92 // p11.22       |
| 204029_at    | <i>CELSR2</i>         | -4.7735333 | -2.2550576 | 4.7735333 | down | chr1:109792640-109818372 (+) // 98.95 // p13.3     |
| 233621_s_at  | <i>ARHGEF12</i>       | -4.76655   | -2.2529454 | 4.76655   | down | chr11:120276641-120282539 (-) // 90.51 // q23.3    |
| 223063_at    | <i>C1orf198</i>       | -4.765506  | -2.2526293 | 4.765506  | down | chr1:230972865-230975381 (-) // 98.47 // q42.2     |
| 209573_s_at  | <i>LDLRAD4</i>        | -4.755195  | -2.2495046 | 4.755195  | down | chr18:13278099-13653093 (+) // 98.8 // p11.21      |
| 210934_at    | <i>BLK</i>            | -4.7516365 | -2.2484245 | 4.7516365 | down | chr8:11351677-11367397 (+) // 97.39 // p23.1       |
| 45633_at     | <i>GINS3</i>          | -4.739419  | -2.2447102 | 4.739419  | down | chr16:58439296-58440047 (+) // 95.41 // q21        |
| 219157_at    | <i>KLHL2</i>          | -4.7336125 | -2.2429416 | 4.7336125 | down | chr4:166128921-166244293 (+) // 99.83 // q32.3     |
| 230877_at    | <i>IGHD</i>           | -4.7230377 | -2.239715  | 4.7230377 | down | chr14:106303098-106307940 (-) // 96.24 // q32.33   |
| 212279_at    | <i>TMEM97</i>         | -4.719495  | -2.2386324 | 4.719495  | down | chr17:26646128-26655404 (+) // 84.6 // q11.2       |
| 222158_s_at  | <i>DES12</i>          | -4.716567  | -2.2377372 | 4.716567  | down | chr1:244816457-244869241 (+) // 81.93 // q44       |
| 227921_at    |                       | -4.683136  | -2.227475  | 4.683136  | down |                                                    |
| 235674_at    |                       | -4.677144  | -2.225628  | 4.677144  | down | chr4:154558198-154558759 (+) // 73.46 // q31.3     |
| 225246_at    | <i>STIM2</i>          | -4.675819  | -2.225219  | 4.675819  | down | chr4:26862564-27027003 (+) // 96.17 // p15.2       |
|              |                       |            |            |           |      | chr3:195378718-195379150 (+) // 83.69 //           |
|              |                       |            |            |           |      | q29///chr3:197360532-197360975 (-) // 83.69 //     |
|              |                       |            |            |           |      | q29///chr3:195722955-195723398 (-) // 86.23 //     |
|              |                       |            |            |           |      | q29///chr3:195663472-195663904 (-) // 83.05 // q29 |
| 214373_at    |                       | -4.669807  | -2.223363  | 4.669807  | down | chr20:61472467-61492976 (-) // 91.75 // q13.33     |
| 204849_at    | <i>DPH3P1///TCFL5</i> | -4.669189  | -2.223172  | 4.669189  | down | chr4:27004621-27025582 (+) // 92.54 // p15.2       |
| 234140_s_at  | <i>STIM2</i>          | -4.666897  | -2.2224636 | 4.666897  | down | chr3:48455167-48466020 (-) // 99.95 // p21.31      |
| 215668_s_at  | <i>PLXNB1</i>         | -4.6600866 | -2.2203567 | 4.6600866 | down | chr13:67780302-67780881 (-) // 50.59 // q21.32     |
| 1565602_at   |                       | -4.655431  | -2.2189147 | 4.655431  | down | chr22:45133086-45133561 (+) // 76.37 // q13.31     |
| 47069_at     | <i>PRR5</i>           | -4.6491776 | -2.2169755 | 4.6491776 | down | chr7:73150426-73153116 (-) // 77.51 // q11.23      |
| 221927_s_at  | <i>ABHD11</i>         | -4.648952  | -2.2169056 | 4.648952  | down | chr6:27834571-27835425 (-) // 100.0 // p22.1       |
| 214534_at    | <i>HIST1H1B</i>       | -4.6443377 | -2.215473  | 4.6443377 | down | chr19:42046558-42047260 (+) // 28.24 // q13.2      |
| 236099_at    |                       | -4.643005  | -2.2150588 | 4.643005  | down |                                                    |

|              |                  |            |            |           |      |                                                 |
|--------------|------------------|------------|------------|-----------|------|-------------------------------------------------|
| 208644_at    | <i>PARP1</i>     | -4.641226  | -2.214506  | 4.641226  | down | chr1:226548704-226595791 (-) // 99.62 // q42.12 |
| 224240_s_at  | <i>CCL28</i>     | -4.6383996 | -2.213627  | 4.6383996 | down | chr5:43381900-43412470 (-) // 64.71 // p12      |
| 200878_at    | <i>EPAS1</i>     | -4.6354346 | -2.2127047 | 4.6354346 | down | chr2:46524581-46613836 (+) // 96.6 // p21       |
| 238919_at    |                  | -4.6170816 | -2.2069812 | 4.6170816 | down | chr13:67775146-67775679 (-) // 93.89 // q21.32  |
| 41660_at     | <i>CELSR1</i>    | -4.615824  | -2.2065883 | 4.615824  | down | chr22:46757071-46806419 (-) // 92.14 // q13.31  |
| 201691_s_at  | <i>TPD52</i>     | -4.6136494 | -2.2059083 | 4.6136494 | down | chr8:80947748-81083769 (-) // 99.26 // q21.13   |
| 218785_s_at  | <i>RABL5</i>     | -4.604113  | -2.2029233 | 4.604113  | down | chr7:100956648-100965030 (-) // 49.98 // q22.1  |
| 212371_at    | <i>DESI2</i>     | -4.602898  | -2.2025425 | 4.602898  | down | chr1:244870374-244872331 (+) // 97.27 // q44    |
| 224027_at    | <i>CCL28</i>     | -4.6015606 | -2.2021232 | 4.6015606 | down | chr5:43376757-43412472 (-) // 41.44 // p12      |
| 235588_at    | <i>ESCO2</i>     | -4.590452  | -2.1986363 | 4.590452  | down | chr8:27632055-27634576 (+) // 98.7 // p21.1     |
| 216987_at    | <i>IRF4</i>      | -4.5841775 | -2.196663  | 4.5841775 | down | chr6:391767-407616 (+) // 99.94 // p25.3        |
| 206461_x_at  | <i>MT1H</i>      | -4.578649  | -2.194922  | 4.578649  | down | chr16:56703773-56705040 (+) // 94.01 // q13     |
| 60474_at     | <i>FERMT1</i>    | -4.5764008 | -2.1942134 | 4.5764008 | down | chr20:6055711-6056479 (-) // 77.47 // p12.3     |
| 1552789_at   | <i>SEC62</i>     | -4.5701737 | -2.192249  | 4.5701737 | down | chr3:169714257-169716160 (+) // 56.28 // q26.2  |
| 204281_at    | <i>TEAD4</i>     | -4.5694785 | -2.1920295 | 4.5694785 | down | chr12:3068610-3149841 (+) // 97.43 // p13.33    |
| 1555963_x_at | <i>B3GNT7</i>    | -4.5546646 | -2.1873448 | 4.5546646 | down | chr2:232263066-232264809 (+) // 42.09 // q37.1  |
| 237138_at    |                  | -4.553039  | -2.1868298 | 4.553039  | down | chr7:87070448-87070864 (+) // 31.69 // q21.12   |
| 219875_s_at  | <i>DESI2</i>     | -4.5516305 | -2.1863835 | 4.5516305 | down | chr1:244816557-244869558 (+) // 99.82 // q44    |
| 223723_at    | <i>MFI2</i>      | -4.533265  | -2.1805506 | 4.533265  | down | chr3:196745824-196756642 (-) // 91.17 // q29    |
| 204341_at    | <i>TRIM16</i>    | -4.5251613 | -2.1779692 | 4.5251613 | down | chr17:15531280-15555150 (-) // 87.89 // p12     |
| 219551_at    | <i>EAF2</i>      | -4.523517  | -2.177445  | 4.523517  | down | chr3:121554029-121605314 (+) // 97.52 // q13.33 |
| 243261_at    | <i>LINC00689</i> | -4.5217624 | -2.1768851 | 4.5217624 | down | chr7:158824891-158825532 (+) // 92.16 // q36.3  |
| 244261_at    | <i>IFNLR1</i>    | -4.5198684 | -2.1762807 | 4.5198684 | down | chr1:24480646-24481111 (-) // 86.54 // p36.11   |
| 231062_at    | <i>DOCK9-AS2</i> | -4.515665  | -2.1749384 | 4.515665  | down | chr13:99740468-99740878 (+) // 98.79 // q32.3   |
| 240593_x_at  |                  | -4.4920487 | -2.1673737 | 4.4920487 | down | chr4:114543198-114543531 (-) // 33.82 // q26    |
| 227193_at    | <i>SLC30A4</i>   | -4.491066  | -2.167058  | 4.491066  | down | chr15:45771808-45773274 (-) // 97.9 // q21.1    |
| 227242_s_at  | <i>EBF3</i>      | -4.483471  | -2.164616  | 4.483471  | down | chr10:131633495-131762105 (-) // 99.17 // q26.3 |
| 202533_s_at  | <i>DHFR</i>      | -4.4827094 | -2.164371  | 4.4827094 | down | chr5:79924809-79950790 (-) // 94.35 // q14.1    |
| 222713_s_at  | <i>FANCF</i>     | -4.476911  | -2.1625037 | 4.476911  | down | chr11:22646163-22647356 (-) // 98.6 // p14.3    |
| 203220_s_at  | <i>TLE1</i>      | -4.474421  | -2.161701  | 4.474421  | down | chr9:84198599-84303212 (-) // 98.66 // q21.32   |
| 225237_s_at  | <i>MSI2</i>      | -4.47188   | -2.1608815 | 4.47188   | down | chr17:55693354-55760253 (+) // 94.4 // q22      |
| 226530_at    | <i>BMF</i>       | -4.468789  | -2.159884  | 4.468789  | down | chr15:40380090-40398649 (-) // 92.52 // q15.1   |
| 224818_at    | <i>SORT1</i>     | -4.4525266 | -2.1546242 | 4.4525266 | down | chr1:109852192-109855236 (-) // 93.5 // p13.3   |
| 230546_at    | <i>VASH1</i>     | -4.4477296 | -2.153069  | 4.4477296 | down | chr14:77239478-77239992 (+) // 82.62 // q24.3   |
| 208680_at    | <i>PRDX1</i>     | -4.435508  | -2.1490993 | 4.435508  | down | chr1:45976840-45987555 (-) // 99.03 // p34.1    |

|              |                          |            |            |           |      |                                                        |
|--------------|--------------------------|------------|------------|-----------|------|--------------------------------------------------------|
| 208951_at    | <i>ALDH7A1</i>           | -4.4300375 | -2.1473188 | 4.4300375 | down | chr5:76585806-76587735 (+) // 94.46 //                 |
| 231174_s_at  |                          | -4.422313  | -2.1448011 | 4.422313  | down | q13.3///chr5:125880548-125930899 (-) // 97.14 // q23.2 |
| 216322_at    | <i>CD58</i>              | -4.421133  | -2.144416  | 4.421133  | down | chr6:131160852-131161519 (+) // 98.21 // q23.1         |
| 223229_at    | <i>UBE2T</i>             | -4.415156  | -2.1424644 | 4.415156  | down | chr1:117061852-117087208 (+) // 96.54 // p13.1         |
| 201292_at    | <i>TOP2A</i>             | -4.4151196 | -2.1424525 | 4.4151196 | down | chr1:202300950-202304924 (-) // 99.85 // q32.1         |
| 203066_at    | <i>CHST15</i>            | -4.3997674 | -2.1374273 | 4.3997674 | down | chr17:38544776-38574150 (-) // 97.5 // q21.2           |
| 238750_at    | <i>CCL28</i>             | -4.388739  | -2.1338065 | 4.388739  | down | chr10:125767219-125851908 (-) // 96.69 // q26.13       |
| 227752_at    | <i>SPTLC3</i>            | -4.3871922 | -2.133298  | 4.3871922 | down | chr5:43379298-43380180 (-) // 51.68 // p12             |
| 215772_x_at  | <i>SUCLG2</i>            | -4.351066  | -2.121369  | 4.351066  | down | chr20:13146012-13147413 (+) // 92.45 // p12.1          |
| 211658_at    | <i>PRDX2</i>             | -4.3478804 | -2.1203122 | 4.3478804 | down | chr3:67425144-67705002 (-) // 96.33 // p14.1           |
| 225591_at    | <i>FBXO25</i>            | -4.337855  | -2.1169817 | 4.337855  | down | chr19:12907638-12912613 (-) // 89.29 // p13.2          |
| 217640_x_at  | <i>SKA1</i>              | -4.3328366 | -2.1153119 | 4.3328366 | down | chr8:356832-419575 (+) // 99.56 // p23.3               |
| 228813_at    | <i>HDAC4</i>             | -4.329554  | -2.1142185 | 4.329554  | down | chr18:47919245-47920162 (+) // 48.42 // q21.1          |
| 212827_at    | <i>IGHM</i>              | -4.3216968 | -2.1115978 | 4.3216968 | down | chr2:239969869-239970512 (-) // 89.15 // q37.3         |
| 46665_at     | <i>SEMA4C</i>            | -4.3196044 | -2.1108992 | 4.3196044 | down | chr14:106318039-106631502 (-) // 92.08 // q32.33       |
| 205663_at    | <i>PCBP3</i>             | -4.3176284 | -2.110239  | 4.3176284 | down | chr2:97525472-97525948 (-) // 74.61 // q11.2           |
| 212664_at    | <i>TUBB4A</i>            | -4.3119545 | -2.108342  | 4.3119545 | down | chr21:47269874-47362367 (+) // 96.93 // q22.3          |
| 218542_at    | <i>CEP55</i>             | -4.311322  | -2.1081305 | 4.311322  | down | chr19:6494329-6502307 (-) // 89.9 // p13.3             |
| 243452_at    | <i>LOC646778</i>         | -4.308701  | -2.107253  | 4.308701  | down | chr10:95259904-95288847 (+) // 99.78 // q23.33         |
| 201189_s_at  | <i>ITPR3</i>             | -4.3069754 | -2.1066751 | 4.3069754 | down | chr18:29266189-29267276 (+) // 75.62 // q12.1          |
| 223275_at    | <i>PRMT6</i>             | -4.3021965 | -2.1050735 | 4.3021965 | down | chr6:33589343-33664339 (+) // 99.83 // p21.31          |
| 236312_at    |                          | -4.2869163 | -2.0999403 | 4.2869163 | down | chr1:107599445-107601652 (+) // 97.63 // p13.3         |
| 223971_at    | <i>OR2A20P///OR2A7//</i> | -4.274767  | -2.0958457 | 4.274767  | down | chr4:120976765-120977359 (-) // 98.34 // q27           |
| 209374_s_at  | <i>IGHM</i>              | -4.2743526 | -2.095706  | 4.2743526 | down | chr7:143996333-143997038 (+) // 90.07 //               |
| 1555557_a_at | <i>TNK2</i>              | -4.270201  | -2.094304  | 4.270201  | down | q35///chr7:143948123-143948828 (-) // 90.07 // q35     |
| 2028_s_at    | <i>E2F1</i>              | -4.2626457 | -2.0917492 | 4.2626457 | down | chr14:106320321-106830051 (-) // 96.49 // q32.33       |
| 215384_s_at  | <i>MAP1A</i>             | -4.2527924 | -2.0884104 | 4.2527924 | down | chr3:195590235-195619452 (-) // 97.49 // q29           |
| 201291_s_at  | <i>TOP2A</i>             | -4.2378445 | -2.0833306 | 4.2378445 | down | chr20:32263488-32274197 (-) // 93.76 // q11.22         |
| 203608_at    | <i>ALDH5A1</i>           | -4.2368803 | -2.0830023 | 4.2368803 | down | chr15:43814544-43815779 (+) // 88.21 // q15.3          |
| 238634_x_at  |                          | -4.2278686 | -2.0799305 | 4.2278686 | down | chr17:38544776-38574150 (-) // 97.5 // q21.2           |
| 225389_at    | <i>BTBD6</i>             | -4.223476  | -2.078431  | 4.223476  | down | chr6:24495007-24537435 (+) // 84.85 // p22.3           |
| 1563802_at   | <i>LOC284551</i>         | -4.2218747 | -2.0778837 | 4.2218747 | down | chr10:90343465-90344285 (+) // 57.85 // q23.31         |
| 219135_s_at  | <i>LMF1</i>              | -4.22032   | -2.0773525 | 4.22032   | down | chr14:105715711-105717430 (+) // 97.72 // q32.33       |
| 219990_at    | <i>E2F8</i>              | -4.219103  | -2.0769362 | 4.219103  | down | chr1:31986546-31989846 (+) // 67.09 // p35.2           |
|              |                          |            |            |           |      | chr16:903618-1020982 (-) // 98.85 // p13.3             |
|              |                          |            |            |           |      | chr11:19245613-19253918 (-) // 94.6 // p15.1           |

|              |                  |            |            |           |      |                                                                                                                                                                                                |
|--------------|------------------|------------|------------|-----------|------|------------------------------------------------------------------------------------------------------------------------------------------------------------------------------------------------|
| 221520_s_at  | CDCA8            | -4.2168994 | -2.0761826 | 4.2168994 | down | chr1:38158158-38175234 (+) // 97.41 // p34.3                                                                                                                                                   |
| 205406_s_at  | SPA17            | -4.215445  | -2.075685  | 4.215445  | down | chr11:124543779-124564685 (+) // 38.49 // q24.2                                                                                                                                                |
| 222958_s_at  | DEPDC1           | -4.1920695 | -2.0676627 | 4.1920695 | down | chr1:68941258-68962765 (-) // 90.28 // p31.2                                                                                                                                                   |
| 233375_at    | EFCAB2           | -4.1883836 | -2.0663936 | 4.1883836 | down | chr1:245133691-245286263 (+) // 41.91 // q44                                                                                                                                                   |
| 209559_at    | HIP1R            | -4.1843557 | -2.0650055 | 4.1843557 | down | chr12:123335801-123347507 (+) // 99.95 // q24.31                                                                                                                                               |
| 203143_s_at  | KIAA0040         | -4.1643414 | -2.0580883 | 4.1643414 | down | chr1:175126122-175161929 (-) // 92.99 // q25.1                                                                                                                                                 |
| 210240_s_at  | CDKN2D           | -4.15553   | -2.0550325 | 4.15553   | down | chr19:10677528-10679329 (-) // 98.87 // p13.2                                                                                                                                                  |
| 203865_s_at  | ADARB1           | -4.147266  | -2.0521605 | 4.147266  | down | chr21:46494514-46646474 (+) // 95.17 // q22.3                                                                                                                                                  |
| 226218_at    | IL7R             | -4.1383176 | -2.0490444 | 4.1383176 | down | chr5:35878177-35879705 (+) // 73.65 // p13.2                                                                                                                                                   |
| 230047_at    | ARHGAP42         | -4.1376653 | -2.048817  | 4.1376653 | down | chr11:100846873-100860755 (+) // 97.28 // q22.1                                                                                                                                                |
| 211080_s_at  | NEK2             | -4.1367416 | -2.0484948 | 4.1367416 | down | chr1:211844572-211847696 (-) // 96.97 // q32.3                                                                                                                                                 |
| 229323_at    | LINC00959        | -4.1358066 | -2.0481687 | 4.1358066 | down | chr10:131862036-131878095 (-) // 85.76 // q26.3                                                                                                                                                |
| 208950_s_at  | ALDH7A1          | -4.1212726 | -2.0430899 | 4.1212726 | down | chr5:76585806-76587735 (+) // 94.46 // q13.3//chr5:125880548-125930899 (-) // 97.14 // q23.2                                                                                                   |
| 213599_at    | OIP5             | -4.1121836 | -2.0399046 | 4.1121836 | down | chr15:41601317-41624801 (-) // 96.49 // q15.1                                                                                                                                                  |
| 219039_at    | SEMA4C           | -4.093919  | -2.0334826 | 4.093919  | down | chr2:97525478-97530503 (-) // 97.01 // q11.2                                                                                                                                                   |
| 229167_at    | PURA             | -4.08999   | -2.0320973 | 4.08999   | down | chr5:139498177-139499001 (+) // 74.97 // q31.2                                                                                                                                                 |
| 201688_s_at  | TPD52            | -4.084727  | -2.0302396 | 4.084727  | down | chr8:80947571-81083777 (-) // 97.78 // q21.13                                                                                                                                                  |
| 225090_at    | SYVN1            | -4.081709  | -2.0291734 | 4.081709  | down | chr11:64894750-64897793 (-) // 94.88 // q13.1                                                                                                                                                  |
| 238777_x_at  | ATMIN            | -4.074533  | -2.0266347 | 4.074533  | down | chr3:195730056-195731964 (+) // 44.32 // q29                                                                                                                                                   |
| 1561363_a_at |                  | -4.0734057 | -2.0262356 | 4.0734057 | down | chr10:47576261-47578460 (-) // 62.48 // q11.22//chr10:51451292-51453491 (-) // 62.35 // q11.23//chr10:46701817-46704017 (-) // 61.16 // q11.22//chr10:48888365-48890565 (-) // 61.07 // q11.22 |
| 212023_s_at  | MKI67            | -4.069308  | -2.0247834 | 4.069308  | down | chr10:129894926-129924649 (-) // 98.21 // q26.2                                                                                                                                                |
| 221021_s_at  | CTNBL1           | -4.063644  | -2.022774  | 4.063644  | down | chr20:36407684-36500519 (+) // 97.49 // q11.23                                                                                                                                                 |
| 221583_s_at  | KCNMA1           | -4.06257   | -2.0223927 | 4.06257   | down | chr10:78644636-79397568 (-) // 95.13 // q22.3                                                                                                                                                  |
| 216942_s_at  | CD58             | -4.0581126 | -2.020809  | 4.0581126 | down | chr1:117061852-117087212 (-) // 97.53 // p13.1                                                                                                                                                 |
| 237974_at    | ABHD12B//MIR4454 | -4.0464463 | -2.0166554 | 4.0464463 | down | chr14:51371224-51371687 (+) // 37.14 // q22.1                                                                                                                                                  |
| 209000_s_at  | 8.Sep            | -4.04376   | -2.0156972 | 4.04376   | down | chr5:132093835-132099568 (-) // 98.95 // q31.1                                                                                                                                                 |
| 1561460_at   | AC016909.1//OTTH | -4.039412  | -2.0141454 | 4.039412  | down | chr2:133673155-133689065 (+) // 29.11 // q21.2                                                                                                                                                 |
| 202071_at    | SDC4             | -4.0366683 | -2.013165  | 4.0366683 | down | chr20:43953930-43977050 (-) // 90.82 // q13.12                                                                                                                                                 |
| 1565601_at   |                  | -4.035605  | -2.012785  | 4.035605  | down | chr13:67780292-67780881 (+) // 50.59 // q21.32                                                                                                                                                 |
| 208577_at    | HIST1H3A//HIST1H | -4.0290956 | -2.010456  | 4.0290956 | down | chr6:26045638-26046049 (+) // 99.76 // p22.2                                                                                                                                                   |
| 234541_s_at  | ARHGEF12         | -4.028826  | -2.0103595 | 4.028826  | down | chr11:120300113-120301227 (-) // 66.58 // q23.3                                                                                                                                                |
| 238692_at    | BTBD11           | -4.027803  | -2.009993  | 4.027803  | down | chr12:108035875-108052530 (+) // 90.33 // q23.3                                                                                                                                                |



|              |                  |            |            |           |      |                                                  |
|--------------|------------------|------------|------------|-----------|------|--------------------------------------------------|
| 209772_s_at  | CD24             | -4.0268393 | -2.0096478 | 4.0268393 | down | chrY:21154234-21154652 (-) // 98.33 // q11.222   |
| 230257_s_at  | TSEN15           | -4.0163293 | -2.0058775 | 4.0163293 | down | chr1:184020918-184023997 (+) // 64.93 // q25.3   |
| 243579_at    | MSI2             | -4.016252  | -2.0058498 | 4.016252  | down | chr17:55334110-55339555 (+) // 54.05 // q22      |
| 212316_at    | NUP210           | -4.015249  | -2.0054893 | 4.015249  | down | chr3:13357734-13384804 (-) // 98.4 // p25.1      |
| 227877_at    | ANXA2R           | -4.0135207 | -2.0048683 | 4.0135207 | down | chr5:43039334-43040127 (-) // 94.03 // p12       |
| 1552680_a_at | CASC5            | -4.007751  | -2.0027928 | 4.007751  | down | chr15:40886446-40954400 (+) // 98.37 // q15.1    |
| 209182_s_at  | C10orf10         | -4.006843  | -2.002466  | 4.006843  | down | chr10:45471576-45474257 (-) // 91.19 // q11.21   |
| 227173_s_at  | BACH2            | -4.0053816 | -2.0019398 | 4.0053816 | down | chr6:90636250-91006461 (-) // 96.35 // q15       |
| 224626_at    | SLC35A4          | -4.0039577 | -2.0014267 | 4.0039577 | down | chr5:139944060-139948802 (+) // 98.55 // q31.3   |
| 222809_x_at  | CCDC85C          | -3.9999094 | -1.9999673 | 3.9999094 | down | chr14:99977529-99981417 (-) // 92.39 // q32.2    |
| 266_s_at     | CD24             | -3.9967415 | -1.9988242 | 3.9967415 | down | chrY:21152536-21154651 (-) // 83.7 // q11.222    |
| 220011_at    | AUNIP            | -3.9919543 | -1.9970952 | 3.9919543 | down | chr1:26160496-26185848 (-) // 85.3 // p36.11     |
| 212856_at    | GRAMD4           | -3.987477  | -1.9954762 | 3.987477  | down | chr22:47022711-47075682 (+) // 97.11 // q13.31   |
| 222772_at    | MYEF2            | -3.9856799 | -1.9948258 | 3.9856799 | down | chr15:48432009-48470550 (-) // 89.23 // q21.1    |
| 210786_s_at  | FLI1             | -3.9855556 | -1.9947809 | 3.9855556 | down | chr11:128563982-128681115 (+) // 99.38 // q24.3  |
| 1561737_at   |                  | -3.9838495 | -1.9941632 | 3.9838495 | down | chr10:98513917-98514597 (+) // 20.11 // q24.1    |
| 238965_at    | AP001062.7//OTTH | -3.9834769 | -1.9940282 | 3.9834769 | down | chr21:45751839-45752982 (+) // 94.28 // q22.3    |
| 238871_at    | MLLT4            | -3.9797766 | -1.9926875 | 3.9797766 | down | chr6:168365039-168365793 (+) // 93.89 // q27     |
| 212459_x_at  | SUCLG2           | -3.979057  | -1.9924266 | 3.979057  | down | chr3:67425142-67705085 (-) // 86.68 // p14.1     |
| 1555613_a_at | ZAP70            | -3.9778686 | -1.9919956 | 3.9778686 | down | chr2:98350868-98355961 (+) // 100.0 // q11.2     |
| 232249_at    | FMNL3            | -3.977149  | -1.9917346 | 3.977149  | down | chr12:50038716-50045175 (-) // 94.54 // q13.12   |
| 226456_at    | RMI2             | -3.9734225 | -1.9903822 | 3.9734225 | down | chr16:11439305-11445617 (+) // 85.68 // p13.13   |
| 212797_at    | SORT1            | -3.973099  | -1.9902648 | 3.973099  | down | chr1:109855074-109940551 (-) // 99.47 // p13.3   |
| 204458_at    | PLA2G15          | -3.966096  | -1.9877195 | 3.966096  | down | chr16:68279275-68294961 (+) // 97.22 // q22.1    |
| 203560_at    | GGH              | -3.9482148 | -1.9812005 | 3.9482148 | down | chr8:63927640-63951386 (-) // 98.67 // q12.3     |
| 213252_at    | SH3PXD2A         | -3.9478571 | -1.9810698 | 3.9478571 | down | chr10:105358203-105484119 (-) // 96.34 // q24.33 |
| 219396_s_at  | MIR631//NEIL1    | -3.9444718 | -1.9798322 | 3.9444718 | down | chr15:75639409-75647586 (+) // 97.65 // q24.2    |
| 222988_s_at  | TMEM9            | -3.939576  | -1.9780403 | 3.939576  | down | chr1:201103900-201123618 (-) // 93.15 // q32.1   |
| 1556538_at   | MFI2             | -3.937624  | -1.9773253 | 3.937624  | down | chr3:196752410-196756165 (-) // 90.76 // q29     |
| 228391_at    | CYP4V2           | -3.9369195 | -1.9770672 | 3.9369195 | down | chr4:187133962-187134612 (+) // 83.33 // q35.2   |
| 224428_s_at  | CDCA7            | -3.9323964 | -1.9754088 | 3.9323964 | down | chr2:174219547-174233630 (+) // 99.4 // q31.1    |
| 203221_at    | TLE1             | -3.9317918 | -1.975187  | 3.9317918 | down | chr9:84198599-84303212 (-) // 98.66 // q21.32    |
| 211200_s_at  | EFCAB2           | -3.928015  | -1.9738004 | 3.928015  | down | chr1:27939138-27953078 (-) // 85.48 // p36.11    |
| 226745_at    | CYP4V2           | -3.926188  | -1.9731293 | 3.926188  | down | chr4:187125447-187134266 (+) // 69.23 // q35.2   |
| 204641_at    | NEK2             | -3.9214895 | -1.9714017 | 3.9214895 | down | chr1:211836121-211848947 (-) // 99.34 // q32.3   |
| 204603_at    | EXO1             | -3.917075  | -1.9697767 | 3.917075  | down | chr1:242012135-242053047 (+) // 98.94 // q43     |

|              |                     |            |            |           |      |                                                      |
|--------------|---------------------|------------|------------|-----------|------|------------------------------------------------------|
| 226725_at    | <i>SLFN5</i>        | -3.916762  | -1.9696615 | 3.916762  | down | chr17:33596022-33597460 (+) // 41.17 // q12          |
| 204033_at    | <i>TRIP13</i>       | -3.915902  | -1.9693446 | 3.915902  | down | chr5:893068-918070 (+) // 98.64 // p15.33            |
| 230026_at    | <i>MRPL43</i>       | -3.90419   | -1.9650233 | 3.90419   | down | chr10:102741133-102747190 (-) // 87.79 // q24.31     |
| 209948_at    | <i>KCNMB1</i>       | -3.9041178 | -1.9649966 | 3.9041178 | down | chr5:169805295-169816340 (-) // 99.63 // q35.1       |
| 231955_s_at  | <i>HIBADH</i>       | -3.9023542 | -1.9643447 | 3.9023542 | down | chr7:27565832-27702606 (-) // 97.94 // p15.2         |
| 200782_at    | <i>ANXA5</i>        | -3.8969634 | -1.9623504 | 3.8969634 | down | chr4:122589147-122618176 (-) // 99.02 // q27         |
| 223321_s_at  | <i>FGFRL1</i>       | -3.8842504 | -1.9576362 | 3.8842504 | down | chr4:1006255-1020663 (+) // 70.68 // p16.3           |
| 225877_at    | <i>TYSND1</i>       | -3.88174   | -1.9567035 | 3.88174   | down | chr10:71898963-71906472 (-) // 94.6 // q22.1         |
| 206666_at    | <i>GZMK</i>         | -3.8810713 | -1.956455  | 3.8810713 | down | chr5:54320110-54329959 (+) // 100.0 // q11.2         |
| 204993_at    | <i>GNAZ</i>         | -3.8802118 | -1.9561354 | 3.8802118 | down | chr22:23437878-23467218 (+) // 97.09 // q11.22       |
| 223234_at    | <i>MAD2L2</i>       | -3.864321  | -1.950215  | 3.864321  | down | chr1:11734782-11740671 (-) // 99.0 // p36.22         |
| 228805_at    | <i>SIMC1</i>        | -3.863732  | -1.949995  | 3.863732  | down | chr5:175772183-175772988 (+) // 87.01 // q35.2       |
| 220563_s_at  | <i>SHANK1</i>       | -3.8549006 | -1.9466937 | 3.8549006 | down | chr19:51165083-51220195 (-) // 94.88 // q13.33       |
| 219109_at    | <i>SPAG16</i>       | -3.8521197 | -1.9456525 | 3.8521197 | down | chr2:214149142-214182689 (+) // 82.47 // q34         |
| 41037_at     | <i>TEAD4</i>        | -3.847733  | -1.9440087 | 3.847733  | down | chr12:3068610-3149831 (+) // 85.77 // p13.33         |
| 200923_at    | <i>LGALS3BP</i>     | -3.8469975 | -1.9437329 | 3.8469975 | down | chr17:76967336-76976061 (-) // 99.91 // q25.3        |
| 204891_s_at  | <i>LCK</i>          | -3.8331697 | -1.9385378 | 3.8331697 | down | chr1:32716931-32751761 (+) // 92.03 // p35.1         |
| 1564175_at   | <i>LINC00960</i>    | -3.8299055 | -1.9373088 | 3.8299055 | down |                                                      |
| 1563849_at   | <i>SH2D4B</i>       | -3.8273013 | -1.9363275 | 3.8273013 | down | chr10:82403748-82406314 (+) // 72.62 // q23.1        |
| 218719_s_at  | <i>GIN53</i>        | -3.8254528 | -1.9356306 | 3.8254528 | down | chr16:58426392-58439940 (+) // 99.95 // q21          |
| 215519_x_at  | <i>SGSM3</i>        | -3.8249264 | -1.935432  | 3.8249264 | down | chr22:40802563-40806108 (+) // 99.87 // q13.1        |
| 1554768_a_at | <i>MAD2L1</i>       | -3.821307  | -1.9340662 | 3.821307  | down | chr14:61246600-61247401 (+) // 96.29 //              |
| 232238_at    | <i>ASPM</i>         | -3.8086839 | -1.9292926 | 3.8086839 | down | q23.1///chr4:120981183-120987973 (-) // 99.55 // q27 |
| 215117_at    | <i>RAG2</i>         | -3.8053544 | -1.9280308 | 3.8053544 | down | chr1:197073859-197104330 (-) // 99.11 // q31.3       |
| 203245_s_at  | <i>LINC00094</i>    | -3.804546  | -1.9277244 | 3.804546  | down | chr11:36613735-36614698 (-) // 99.48 // p12          |
| 226075_at    | <i>SPSB1</i>        | -3.8016953 | -1.9266429 | 3.8016953 | down | chr3:50384922-50388184 (-) // 57.77 // p21.31        |
| 203304_at    | <i>BAMBI</i>        | -3.7997851 | -1.9259179 | 3.7997851 | down | chr1:9427930-9429588 (+) // 95.55 // p36.22          |
| 238607_at    | <i>ZNF296</i>       | -3.7987611 | -1.925529  | 3.7987611 | down | chr10:28966452-28971696 (+) // 97.7 // p12.1         |
| 203767_s_at  | <i>STS</i>          | -3.798181  | -1.9253087 | 3.798181  | down | chr19:45574758-45575542 (-) // 93.53 // q13.32       |
| 238058_at    | <i>LOC150381</i>    | -3.793988  | -1.9237151 | 3.793988  | down | chrX:7137496-7272851 (+) // 88.85 // p22.31          |
| 232103_at    | <i>BPNT1</i>        | -3.792659  | -1.9232097 | 3.792659  | down | chr22:46449584-46453089 (+) // 94.49 // q13.31       |
| 1559618_at   | <i>LOC100129447</i> | -3.7896674 | -1.9220712 | 3.7896674 | down | chr1:220230823-220263111 (-) // 72.72 // q41         |
| 219930_at    | <i>KLF8</i>         | -3.786478  | -1.9208566 | 3.786478  | down | chr12:113528256-113530383 (+) // 59.5 // q24.13      |
| 208923_at    | <i>CYFIP1</i>       | -3.7803957 | -1.9185373 | 3.7803957 | down | chrX:56259331-56311654 (+) // 87.12 // p11.21        |
| 235447_at    | <i>TRUB1</i>        | -3.7794158 | -1.9181633 | 3.7794158 | down | chr15:22892735-23003602 (+) // 99.54 // q11.2        |
|              |                     |            |            |           |      | chr10:116734078-116735678 (+) // 95.58 // q25.3      |



|              |                          |            |            |           |      |                                                                                                                                                                                                                                                      |
|--------------|--------------------------|------------|------------|-----------|------|------------------------------------------------------------------------------------------------------------------------------------------------------------------------------------------------------------------------------------------------------|
| 213067_at    | <i>MYH10</i>             | -3.7782495 | -1.9177179 | 3.7782495 | down | chr17:8408011-8534037 (-) // 98.44 // p13.1<br>chrX:30671654-30738212 (+) // 96.13 //<br>p21.2///chr4:120314873-120316112 (-) // 99.6 //<br>q26///chr4:166199558-166200797 (-) // 98.06 //<br>q32.3///chrX:101034274-101035512 (-) // 97.01 // q22.1 |
| 216316_x_at  | <i>OTTHUMG00000161</i>   | -3.7720122 | -1.9153343 | 3.7720122 | down | chr2:113587336-113594352 (-) // 97.26 // q13                                                                                                                                                                                                         |
| 205067_at    | <i>IL1B</i>              | -3.7709649 | -1.9149337 | 3.7709649 | down | chr1:206808902-206822455 (+) // 99.81 // q32.1                                                                                                                                                                                                       |
| 210151_s_at  | <i>DYRK3</i>             | -3.7690802 | -1.9142125 | 3.7690802 | down | chr1:214776537-214837430 (+) // 97.04 // q41                                                                                                                                                                                                         |
| 207828_s_at  | <i>CENPF</i>             | -3.764291  | -1.9123782 | 3.764291  | down | chr1:245133691-245251138 (+) // 94.83 // q44                                                                                                                                                                                                         |
| 223608_at    | <i>EFCAB2</i>            | -3.7572126 | -1.9096627 | 3.7572126 | down | chr6:24495224-24534858 (+) // 97.31 // p22.3                                                                                                                                                                                                         |
| 203609_s_at  | <i>ALDH5A1</i>           | -3.7524402 | -1.907829  | 3.7524402 | down | chr1:155829323-155854986 (+) // 87.02 // q22                                                                                                                                                                                                         |
| 209197_at    | <i>SYT11</i>             | -3.7473714 | -1.905879  | 3.7473714 | down | chr17:55709478-55710630 (+) // 97.87 // q22                                                                                                                                                                                                          |
| 243010_at    | <i>MSI2</i>              | -3.7443635 | -1.9047205 | 3.7443635 | down | chr12:123506054-123508317 (-) // 78.39 // q24.31                                                                                                                                                                                                     |
| 1562550_at   |                          | -3.7319148 | -1.899916  | 3.7319148 | down | chr12:50034425-50035988 (-) // 76.69 // q13.12                                                                                                                                                                                                       |
| 227844_at    | <i>FMNL3</i>             | -3.7258248 | -1.8975599 | 3.7258248 | down | chr4:8308249-8308822 (+) // 77.61 // p16.1                                                                                                                                                                                                           |
| 226944_at    | <i>HTRA3</i>             | -3.7142885 | -1.8930858 | 3.7142885 | down | chr5:58264869-58265398 (-) // 22.89 // q11.2                                                                                                                                                                                                         |
| 228962_at    | <i>PDE4D</i>             | -3.7121358 | -1.8922495 | 3.7121358 | down | chr16:56691834-56693215 (+) // 89.67 // q12.2                                                                                                                                                                                                        |
| 213629_x_at  | <i>MT1F</i>              | -3.7098348 | -1.8913549 | 3.7098348 | down | chr4:7204174-7206585 (+) // 93.89 // p16.1                                                                                                                                                                                                           |
| 240540_at    |                          | -3.7059672 | -1.8898501 | 3.7059672 | down | chr17:55760948-55762048 (+) // 90.6 // q22                                                                                                                                                                                                           |
| 226134_s_at  | <i>MSI2</i>              | -3.698385  | -1.8868954 | 3.698385  | down | chr11:64901237-64901656 (+) // 70.67 // q13.1                                                                                                                                                                                                        |
| 244522_at    |                          | -3.6973898 | -1.8865072 | 3.6973898 | down | chr4:8288429-8298244 (+) // 90.57 // p16.1                                                                                                                                                                                                           |
| 228580_at    | <i>HTRA3</i>             | -3.6823688 | -1.8806341 | 3.6823688 | down | chr20:25388362-25427957 (+) // 43.04 // p11.21                                                                                                                                                                                                       |
| 206102_at    | <i>GINS1</i>             | -3.6788425 | -1.879252  | 3.6788425 | down | chr17:15622464-15624098 (+) // 42.32 //<br>p12///chr17:18561744-18563390 (-) // 43.17 // p11.2                                                                                                                                                       |
| 227077_at    | <i>ZNF286A///ZNF286E</i> | -3.674935  | -1.8777188 | 3.674935  | down | chr13:75859252-76056250 (-) // 99.05 // q22.2                                                                                                                                                                                                        |
| 203387_s_at  | <i>TBC1D4</i>            | -3.6676118 | -1.874841  | 3.6676118 | down | chr22:23522698-23658144 (+) // 94.56 // q11.23                                                                                                                                                                                                       |
| 202315_s_at  | <i>BCR</i>               | -3.6621277 | -1.8726821 | 3.6621277 | down | chr19:37407242-37441256 (+) // 96.53 // q13.12                                                                                                                                                                                                       |
| 1568900_a_at | <i>ZNF568</i>            | -3.651023  | -1.8683007 | 3.651023  | down | chr9:84248383-84303363 (-) // 97.75 // q21.32                                                                                                                                                                                                        |
| 228284_at    | <i>TLE1</i>              | -3.6470368 | -1.8667247 | 3.6470368 | down | chr15:40886446-40954400 (+) // 98.37 // q15.1                                                                                                                                                                                                        |
| 1552682_a_at | <i>CASC5</i>             | -3.6446128 | -1.8657656 | 3.6446128 | down | chr15:41060110-41064645 (+) // 90.9 // q15.1                                                                                                                                                                                                         |
| 1569064_at   | <i>C15orf62</i>          | -3.6393242 | -1.8636706 | 3.6393242 | down | chr2:232263066-232264809 (+) // 42.09 // q37.1                                                                                                                                                                                                       |
| 1555962_at   | <i>B3GNT7</i>            | -3.6392841 | -1.8636547 | 3.6392841 | down | chr6:135535674-135538507 (-) // 49.45 // q23.3                                                                                                                                                                                                       |
| 1562398_at   |                          | -3.6344426 | -1.8617342 | 3.6344426 | down | chr18:13278099-13653093 (+) // 98.8 // p11.21                                                                                                                                                                                                        |
| 209574_s_at  | <i>LDLRAD4</i>           | -3.6306248 | -1.8602178 | 3.6306248 | down | chr6:52535932-52551383 (+) // 90.42 // p12.2                                                                                                                                                                                                         |
| 218477_at    | <i>TMEM14A</i>           | -3.6301706 | -1.8600373 | 3.6301706 | down | chr3:42704514-42709072 (+) // 95.82 // p22.1                                                                                                                                                                                                         |
| 226484_at    | <i>ZBTB47</i>            | -3.625061  | -1.8580053 | 3.625061  | down | chr21:35888787-35986142 (-) // 99.26 // q22.12                                                                                                                                                                                                       |
| 208370_s_at  | <i>RCAN1</i>             | -3.6169372 | -1.8547685 | 3.6169372 | down |                                                                                                                                                                                                                                                      |

|              |                   |            |            |           |      |                                                                                                 |
|--------------|-------------------|------------|------------|-----------|------|-------------------------------------------------------------------------------------------------|
| 1554994_at   | RAG1              | -3.6091201 | -1.8516471 | 3.6091201 | down | chr11:36537013-36614704 (+) // 91.79 // p12                                                     |
| 215785_s_at  | CYFIP2            | -3.6033437 | -1.8493363 | 3.6033437 | down | chr5:156738671-156820233 (+) // 94.61 // q33.3                                                  |
| 210115_at    | RPL39L            | -3.5989182 | -1.8475633 | 3.5989182 | down | chr3:186838740-186857209 (-) // 100.0 // q27.3                                                  |
| 213253_at    | SMC2              | -3.596419  | -1.8465612 | 3.596419  | down | chr9:106856839-106904077 (+) // 90.34 // q31.1                                                  |
| 214945_at    | FAM153A///FAM153E | -3.5942166 | -1.8456774 | 3.5942166 | down | chr5:175511874-175554127 (+) // 73.69 // q35.2///chr5:177138067-177180298 (-) // 72.81 // q35.3 |
| 39402_at     | IL1B              | -3.5942035 | -1.8456721 | 3.5942035 | down | chr2:113587336-113594384 (-) // 95.94 // q13                                                    |
| 238804_at    | AC024560.2///OTTH | -3.5923505 | -1.8449281 | 3.5923505 | down | chr3:195355780-195356401 (+) // 74.64 // q29///chr3:197387406-197388027 (-) // 74.8 // q29      |
| 221125_s_at  | KCNMB3            | -3.5870438 | -1.8427954 | 3.5870438 | down | chr3:178960555-178968832 (-) // 99.32 // q26.32                                                 |
| 225043_at    | SLC15A4           | -3.582741  | -1.8410637 | 3.582741  | down | chr12:129277738-129299872 (-) // 98.15 // q24.32                                                |
| 1563691_at   | LOC285300         | -3.5740657 | -1.8375661 | 3.5740657 | down | chr3:75716699-75721241 (-) // 69.8 // p12.3                                                     |
| 236297_at    |                   | -3.570281  | -1.8360376 | 3.570281  | down | chr10:20570165-20570599 (+) // 96.66 // p12.31                                                  |
| 231013_at    |                   | -3.56009   | -1.8319137 | 3.56009   | down | chr17_gl000205_random:114215-114794 (+) // 82.59 // chrX:7137496-7272851 (+) // 88.85 // p22.31 |
| 203768_s_at  | STS               | -3.5532691 | -1.829147  | 3.5532691 | down | chr1:151039692-151040972 (+) // 96.53 // q21.3                                                  |
| 211071_s_at  | MLLT11            | -3.5517237 | -1.8285193 | 3.5517237 | down | chr6:158589383-158613446 (+) // 89.01 // q25.3                                                  |
| 213357_at    | GTF2H5            | -3.5496583 | -1.8276801 | 3.5496583 | down | chr3:160795658-160796692 (+) // 98.95 // q26.1                                                  |
| 228108_at    | PPM1L             | -3.5410173 | -1.8241639 | 3.5410173 | down | chr1:25943958-26110938 (+) // 94.3 // p36.11                                                    |
| 218918_at    | MAN1C1            | -3.518792  | -1.8150802 | 3.518792  | down | chr3:195590235-195635955 (-) // 97.12 // q29                                                    |
| 203839_s_at  | TNK2              | -3.5171762 | -1.8144176 | 3.5171762 | down | chr3:48200047-48229889 (-) // 96.16 // p21.31                                                   |
| 204696_s_at  | CDC25A            | -3.5161765 | -1.8140075 | 3.5161765 | down | chr8:86089457-86126453 (+) // 95.4 // q21.2                                                     |
| 221586_s_at  | E2F5              | -3.5102592 | -1.8115776 | 3.5102592 | down | chr12:70149161-70188284 (-) // 95.93 // q15                                                     |
| 228432_at    | RAB3IP            | -3.5063624 | -1.8099751 | 3.5063624 | down | chr5:78671512-78746946 (-) // 97.18 // q14.1                                                    |
| 213793_s_at  | HOMER1            | -3.4976392 | -1.8063815 | 3.4976392 | down | chr21:47349842-47352477 (-) // 92.94 // q22.3                                                   |
| 233998_x_at  | PRED62            | -3.494091  | -1.8049172 | 3.494091  | down | chr10:72643417-72645687 (-) // 96.47 // q22.1                                                   |
| 203557_s_at  | PCBD1             | -3.4936428 | -1.8047321 | 3.4936428 | down | chr17:55693354-55760253 (+) // 94.4 // q22                                                      |
| 225238_at    | MSI2              | -3.4902706 | -1.8033389 | 3.4902706 | down | chr5:158125562-158526543 (-) // 96.66 // q33.3                                                  |
| 232204_at    | EBF1              | -3.4886672 | -1.802676  | 3.4886672 | down | chr4:57897245-57976539 (-) // 98.58 // q12                                                      |
| 201162_at    | IGFBP7            | -3.4881847 | -1.8024764 | 3.4881847 | down | chr1:53124714-53164038 (-) // 50.27 // p32.3                                                    |
| 222883_at    | SELRC1            | -3.484733  | -1.8010482 | 3.484733  | down | chr11:88059253-88070910 (-) // 94.86 // q14.2                                                   |
| 225647_s_at  | CTSC              | -3.4838765 | -1.8006935 | 3.4838765 | down | chr19:42381361-42385143 (+) // 92.73 // q13.2                                                   |
| 1555779_a_at | CD79A             | -3.4797785 | -1.7989955 | 3.4797785 | down | chr1:151319485-151320503 (+) // 99.31 // q21.3                                                  |
| 230787_at    | OTTHUMG0000001    | -3.4790652 | -1.7986997 | 3.4790652 | down | chr1:9325177-9331392 (+) // 71.76 // p36.22                                                     |
| 226160_at    | H6PD              | -3.4766085 | -1.7976806 | 3.4766085 | down | chr10:129894926-129924649 (-) // 98.21 // q26.2                                                 |
| 212021_s_at  | MKI67             | -3.4732878 | -1.796302  | 3.4732878 | down | chr17:55761042-55761787 (-) // 99.46 // q22                                                     |
| 230894_s_at  |                   | -3.4680269 | -1.7941151 | 3.4680269 | down |                                                                                                 |

|              |                        |            |            |           |      |                                                        |
|--------------|------------------------|------------|------------|-----------|------|--------------------------------------------------------|
| 219330_at    | <i>VANGL1</i>          | -3.4679606 | -1.7940875 | 3.4679606 | down | chr1:116234924-116236318 (+) // 98.52 // p13.1         |
| 203343_at    | <i>UGDH</i>            | -3.4620142 | -1.7916117 | 3.4620142 | down | chr4:39500379-39528973 (-) // 89.59 // p14             |
| 211088_s_at  | <i>PLK4</i>            | -3.4576018 | -1.7897717 | 3.4576018 | down | chr4:128806975-128807112 (+) // 93.06 // q28.2         |
| 210334_x_at  | <i>BIRC5</i>           | -3.455726  | -1.7889888 | 3.455726  | down | chr17:76210371-76219705 (+) // 87.67 // q25.3          |
| 224729_s_at  | <i>ATPAF1</i>          | -3.4532244 | -1.7879441 | 3.4532244 | down | chr1:47098412-47101725 (-) // 71.77 // p33             |
| 202365_at    | <i>UNC119B</i>         | -3.4491794 | -1.7862532 | 3.4491794 | down | chr12:121160998-121161442 (+) // 96.94 // q24.31       |
| 1555271_a_at | <i>TERT</i>            | -3.448867  | -1.7861226 | 3.448867  | down | chr5:1253842-1295104 (-) // 98.63 // p15.33            |
| 211767_at    | <i>GINS4</i>           | -3.4438808 | -1.7840352 | 3.4438808 | down | chr8:41386745-41399898 (+) // 74.05 // p11.21          |
| 224596_at    | <i>SLC44A1</i>         | -3.4433548 | -1.7838149 | 3.4433548 | down | chr9:108007029-108153684 (+) // 96.06 // q31.1         |
| 239030_at    |                        | -3.4395075 | -1.782202  | 3.4395075 | down | chr17:75447682-75448256 (-) // 96.12 // q25.3          |
| 1553691_at   | <i>B3GALNT2</i>        | -3.437443  | -1.7813358 | 3.437443  | down | chr1:235612643-235667884 (-) // 99.96 // q42.3         |
| 209726_at    | <i>CA11</i>            | -3.4359665 | -1.780716  | 3.4359665 | down | chr19:49141271-49149257 (-) // 99.93 // q13.33         |
| 229283_at    | <i>LOC728613</i>       | -3.4356406 | -1.7805791 | 3.4356406 | down | chr5:1599038-1599857 (-) // 96.05 // p15.33            |
| 211744_s_at  | <i>CD58</i>            | -3.4306703 | -1.7784904 | 3.4306703 | down | chr1:117064418-117113661 (-) // 97.02 // p13.1         |
| 228402_at    | <i>ZBED3</i>           | -3.4288936 | -1.7777431 | 3.4288936 | down | chr5:76372440-76373063 (-) // 95.41 // q13.3           |
| 233089_at    | <i>QRSL1</i>           | -3.4257793 | -1.7764323 | 3.4257793 | down | chr6:107077488-107101698 (+) // 57.9 // q21            |
| 239946_at    |                        | -3.4249482 | -1.7760822 | 3.4249482 | down | chr4:154418346-154419033 (+) // 70.2 // q31.3          |
| 222936_s_at  | <i>DES12</i>           | -3.4248102 | -1.776024  | 3.4248102 | down | chr1:244816557-244869558 (-) // 98.56 // q44           |
| 1554887_at   | <i>OTTHUMG00000157</i> | -3.4131474 | -1.7711028 | 3.4131474 | down | chrX:130854868-130855395 (+) // 10.73 // q26.2         |
| 215925_s_at  | <i>CD72</i>            | -3.4034405 | -1.7669939 | 3.4034405 | down | chr9:35609981-35618410 (-) // 99.78 // p13.3           |
|              |                        |            |            |           |      | chr22:25714222-25716189 (+) // 96.16 //                |
|              |                        |            |            |           |      | q11.23//chr22:23915316-23982614 (-) // 93.66 // q11.23 |
| 215946_x_at  | <i>IGLL3P</i>          | -3.398391  | -1.7648518 | 3.398391  | down | chr1:235610527-235611546 (-) // 60.92 // q42.3         |
| 226233_at    | <i>B3GALNT2</i>        | -3.3966887 | -1.764129  | 3.3966887 | down | chr2:31395923-31456724 (-) // 88.06 // p23.1           |
| 1557321_a_at | <i>CAPN14</i>          | -3.3949072 | -1.7633722 | 3.3949072 | down | chr5:14711285-14871616 (-) // 99.17 // p15.2           |
| 223094_s_at  | <i>ANKH</i>            | -3.3921623 | -1.7622052 | 3.3921623 | down | chr8:75276653-75279114 (+) // 98.28 // q21.11          |
| 226269_at    | <i>GDAP1</i>           | -3.3884122 | -1.7606094 | 3.3884122 | down | chr5:172115482-172118543 (+) // 85.99 // q35.1         |
| 225355_at    | <i>NEURL1B</i>         | -3.3871186 | -1.7600585 | 3.3871186 | down | chr1:75171183-75190515 (-) // 99.94 // p31.1           |
| 202950_at    | <i>CRYZ</i>            | -3.3861132 | -1.7596302 | 3.3861132 | down | chr17:8129291-8129765 (-) // 84.84 // p13.1            |
| 235523_at    | <i>CTC1</i>            | -3.3852754 | -1.7592732 | 3.3852754 | down | chr1:249211771-249212845 (+) // 80.14 // q44           |
| 238004_at    | <i>PGBD2</i>           | -3.3840563 | -1.7587535 | 3.3840563 | down | chr1:178887566-178889235 (+) // 98.87 // q25.2         |
| 227224_at    | <i>RALGPS2</i>         | -3.3707232 | -1.7530582 | 3.3707232 | down | chrX:51636753-51645448 (+) // 93.95 // p11.22          |
| 209014_at    | <i>MAGED1</i>          | -3.3704536 | -1.7529428 | 3.3704536 | down | chr1:117062922-117063526 (-) // 81.19 // p13.1         |
| 243931_at    |                        | -3.3698993 | -1.7527055 | 3.3698993 | down | chr17:65373941-65665781 (-) // 91.68 // q24.2          |
| 227589_at    | <i>PITPNC1</i>         | -3.3694625 | -1.7525184 | 3.3694625 | down | chr10:62629199-62703926 (-) // 97.78 // q21.2          |
| 212651_at    | <i>RHOBTB1</i>         | -3.363933  | -1.750149  | 3.363933  | down | chr17:65692767-65693377 (+) // 96.66 // q24.2          |
| 229414_at    | <i>PITPNC1</i>         | -3.3564355 | -1.7469299 | 3.3564355 | down |                                                        |

|             |                          |            |            |           |      |                                                 |
|-------------|--------------------------|------------|------------|-----------|------|-------------------------------------------------|
| 207826_s_at | <i>ID3</i>               | -3.3553855 | -1.7464786 | 3.3553855 | down | chr1:23884431-23885969 (-) // 92.46 // p36.12   |
| 227646_at   | <i>EBF1</i>              | -3.3548908 | -1.7462658 | 3.3548908 | down | chr5:158123886-158125702 (-) // 95.26 // q33.3  |
| 229370_at   | <i>LOC100996388</i>      | -3.3541095 | -1.7459298 | 3.3541095 | down | chr7:155087627-155089222 (-) // 98.57 // q36.2  |
| 229670_at   |                          | -3.3530314 | -1.745466  | 3.3530314 | down | chr1:167677476-167677929 (+) // 58.28 // q24.2  |
| 203919_at   | <i>TCEA2</i>             | -3.352604  | -1.745282  | 3.352604  | down | chr20:62694647-62703691 (+) // 100.0 // q13.33  |
| 205049_s_at | <i>CD79A</i>             | -3.3505926 | -1.7444162 | 3.3505926 | down | chr19:42381338-42385438 (+) // 99.91 // q13.2   |
| 223423_at   | <i>GPR160</i>            | -3.3500767 | -1.7441941 | 3.3500767 | down | chr3:169755799-169802869 (+) // 97.44 // q26.2  |
| 235230_at   | <i>PLCXD2</i>            | -3.3477678 | -1.7431995 | 3.3477678 | down | chr3:111444185-111445842 (+) // 97.61 // q13.2  |
| 208651_x_at | <i>CD24</i>              | -3.3448098 | -1.7419242 | 3.3448098 | down | chrY:21152836-21154651 (-) // 81.94 // q11.222  |
| 208273_at   | <i>ZNF670//ZNF670-ZI</i> | -3.3422618 | -1.7408247 | 3.3422618 | down | chr1:247150438-247171311 (-) // 83.11 // q44    |
| 229819_at   | <i>A1BG</i>              | -3.337966  | -1.7389692 | 3.337966  | down | chr19:58858171-58861978 (-) // 96.16 // q13.43  |
| 204604_at   | <i>CDK14</i>             | -3.3366637 | -1.7384063 | 3.3366637 | down | chr7:90338711-90839904 (+) // 98.43 // q21.13   |
| 202732_at   | <i>PKIG</i>              | -3.3329961 | -1.7368196 | 3.3329961 | down | chr20:43243193-43247677 (+) // 98.16 // q13.12  |
| 214061_at   | <i>WDR67</i>             | -3.3318052 | -1.736304  | 3.3318052 | down | chr8:124113192-124164390 (+) // 98.48 // q24.13 |
| 218384_at   | <i>CARHSP1</i>           | -3.3296742 | -1.735381  | 3.3296742 | down | chr16:8948770-8953193 (-) // 96.4 // p13.2      |
| 218491_s_at | <i>THYN1</i>             | -3.3291864 | -1.7351696 | 3.3291864 | down | chr11:133944881-134123220 (-) // 97.66 // q25   |
| 225203_at   | <i>PPP1R16A</i>          | -3.328334  | -1.7348002 | 3.328334  | down | chr8:145703448-145727504 (+) // 93.88 // q24.3  |
| 221092_at   | <i>IKZF3</i>             | -3.3279443 | -1.7346313 | 3.3279443 | down | chr17:37921536-38020441 (-) // 99.33 // q12     |
| 239002_at   | <i>ASPM</i>              | -3.32428   | -1.7330419 | 3.32428   | down | chr1:197112709-197115757 (-) // 74.55 // q31.3  |
| 235092_at   |                          | -3.323241  | -1.7325909 | 3.323241  | down | chr18:24124931-24126724 (-) // 95.44 // q11.2   |
| 212599_at   | <i>AUTS2</i>             | -3.3230696 | -1.7325165 | 3.3230696 | down | chr7:69064899-70258054 (+) // 92.54 // q11.22   |
| 223471_at   | <i>RAB3IP</i>            | -3.3229797 | -1.7324774 | 3.3229797 | down | chr12:70132682-70209464 (+) // 68.69 // q15     |
| 215152_at   | <i>MYB</i>               | -3.3205953 | -1.7314419 | 3.3205953 | down | chr6:135503765-135516060 (+) // 99.65 // q23.3  |
| 230193_at   | <i>WDR66</i>             | -3.3176029 | -1.7301412 | 3.3176029 | down | chr12:122437730-122441823 (+) // 93.1 // q24.31 |
| 226889_at   | <i>WDR35</i>             | -3.3138027 | -1.7284877 | 3.3138027 | down | chr2:20110023-20160359 (-) // 99.23 // p24.1    |
| 224910_at   | <i>CARHSP1</i>           | -3.310536  | -1.7270647 | 3.310536  | down | chr16:8946803-8948855 (-) // 76.5 // p13.2      |
| 223700_at   | <i>MND1</i>              | -3.3104384 | -1.7270223 | 3.3104384 | down | chr4:154265861-154336058 (+) // 100.0 // q31.3  |
| 219520_s_at | <i>WWC3</i>              | -3.3095458 | -1.7266332 | 3.3095458 | down | chrX:10111561-10112517 (+) // 55.07 // p22.2    |
| 212321_at   | <i>SGPL1</i>             | -3.309451  | -1.726592  | 3.309451  | down | chr10:72575725-72640946 (+) // 93.41 // q22.1   |
| 223381_at   | <i>NUF2</i>              | -3.304603  | -1.724477  | 3.304603  | down | chr1:163291753-163325547 (+) // 96.9 // q23.3   |
| 238691_at   | <i>SNHG10</i>            | -3.3042707 | -1.7243319 | 3.3042707 | down | chr14:95998878-96000504 (-) // 52.68 // q32.13  |
| 218930_s_at | <i>TMEM106B</i>          | -3.3035424 | -1.7240138 | 3.3035424 | down | chr7:12250923-12272713 (+) // 98.36 // p21.3    |
| 203119_at   | <i>CCDC86</i>            | -3.3035376 | -1.7240118 | 3.3035376 | down | chr11:60609543-60618553 (+) // 91.94 // q12.2   |
| 216250_s_at | <i>LPXN</i>              | -3.3035116 | -1.7240005 | 3.3035116 | down | chr18:21464734-21511519 (-) // 64.39 // q11.2   |
| 201508_at   | <i>IGFBP4</i>            | -3.3011265 | -1.7229584 | 3.3011265 | down | chr17:38599709-38613931 (+) // 91.02 // q21.2   |
| 221841_s_at | <i>KLF4</i>              | -3.3003943 | -1.7226384 | 3.3003943 | down | chr9:110247134-110250706 (-) // 99.01 // q31.2  |

|             |                        |            |            |           |      |                                                  |
|-------------|------------------------|------------|------------|-----------|------|--------------------------------------------------|
| 230240_at   |                        | -3.2990196 | -1.7220373 | 3.2990196 | down | chr1:206827883-206828501 (+) // 96.25 // q32.1   |
| 216379_x_at | <i>CD24</i>            | -3.2961864 | -1.7207979 | 3.2961864 | down | chr6:111587518-111588749 (+) // 61.63 // q21     |
| 216275_at   | <i>BUB1</i>            | -3.2958992 | -1.7206721 | 3.2958992 | down | chr2:111418444-111435640 (+) // 100.0 // q13     |
| 207164_s_at | <i>ZBTB18</i>          | -3.2891567 | -1.7177178 | 3.2891567 | down | chr1:244217097-244219193 (+) // 97.07 // q44     |
| 64900_at    | <i>TMEM231</i>         | -3.2888982 | -1.7176044 | 3.2888982 | down | chr16:75572201-75572939 (-) // 79.53 // q23.1    |
| 1558801_at  | <i>LOC100652772</i>    | -3.287957  | -1.7171915 | 3.287957  | down |                                                  |
| 236169_at   |                        | -3.287183  | -1.7168518 | 3.287183  | down | chr8:123792785-123793547 (+) // 99.61 // q24.13  |
| 221669_s_at | <i>ACAD8</i>           | -3.2865958 | -1.7165941 | 3.2865958 | down | chr11:134123464-134135555 (+) // 96.63 // q25    |
| 219420_s_at | <i>SELRC1</i>          | -3.2861378 | -1.716393  | 3.2861378 | down | chr1:53152513-53164038 (-) // 99.81 // p32.3     |
| 244684_at   |                        | -3.2859213 | -1.716298  | 3.2859213 | down | chr5:114598683-114599144 (+) // 99.57 // q22.3   |
| 205107_s_at | <i>EFNA4</i>           | -3.282396  | -1.7147493 | 3.282396  | down | chr1:155036272-155042014 (+) // 98.9 // q22      |
| 233072_at   | <i>NTNG2</i>           | -3.2771773 | -1.7124537 | 3.2771773 | down | chr9:135073949-135118219 (+) // 86.06 // q34.13  |
| 235773_at   | <i>ZIK1</i>            | -3.2733502 | -1.710768  | 3.2733502 | down | chr19:58102679-58103198 (+) // 98.48 // q13.43   |
| 231715_s_at | <i>PYCR2</i>           | -3.2725348 | -1.7104086 | 3.2725348 | down | chr1:226107781-226111993 (-) // 96.33 // q42.12  |
| 209177_at   | <i>NDUFAF3</i>         | -3.271236  | -1.7098358 | 3.271236  | down | chr3:49059523-49060720 (+) // 96.28 // p21.31    |
| 209483_s_at | <i>NSL1</i>            | -3.2709374 | -1.7097042 | 3.2709374 | down | chr1:212910930-212965135 (+) // 97.91 // q32.3   |
| 205173_x_at | <i>CD58</i>            | -3.2707672 | -1.709629  | 3.2707672 | down | chr1:117057156-117113603 (-) // 100.0 // p13.1   |
| 235732_at   | <i>ZNF704</i>          | -3.2689736 | -1.7088377 | 3.2689736 | down | chr8:81546086-81546951 (-) // 71.01 // q21.13    |
| 203362_s_at | <i>MAD2L1</i>          | -3.2657065 | -1.7073952 | 3.2657065 | down | chr4:120980591-120987963 (-) // 98.63 // q27     |
| 217099_s_at | <i>GEMIN4</i>          | -3.260241  | -1.7049786 | 3.260241  | down | chr17:648105-652591 (-) // 99.87 // p13.3        |
| 223661_at   | <i>NUCKS1</i>          | -3.2593977 | -1.7046055 | 3.2593977 | down | chr1:205682320-205684230 (+) // 97.85 // q32.1   |
| 206663_at   | <i>SP4</i>             | -3.2575026 | -1.7037663 | 3.2575026 | down | chr7:21467688-21551334 (+) // 99.4 // p15.3      |
| 210544_s_at | <i>ALDH3A2</i>         | -3.255893  | -1.7030532 | 3.255893  | down | chr17:19552243-19579804 (+) // 94.24 // p11.2    |
| 50400_at    | <i>PAOX</i>            | -3.2544136 | -1.7023976 | 3.2544136 | down | chr10:135197463-135205197 (+) // 90.16 // q26.3  |
| 225057_at   | <i>SLC15A4</i>         | -3.2514763 | -1.7010949 | 3.2514763 | down | chr12:129277738-129299872 (-) // 98.15 // q24.32 |
| 232267_at   | <i>GPR133</i>          | -3.2495985 | -1.7002615 | 3.2495985 | down | chr12:131555397-131626010 (+) // 98.39 // q24.33 |
| 242157_at   | <i>CHD9</i>            | -3.2413332 | -1.6965873 | 3.2413332 | down | chr16:53154890-53156088 (+) // 71.43 // q12.2    |
| 208381_s_at | <i>SGPL1</i>           | -3.2408733 | -1.6963826 | 3.2408733 | down | chr10:72575787-72637339 (+) // 97.98 // q22.1    |
| 201456_s_at | <i>BUB3</i>            | -3.2396135 | -1.6958218 | 3.2396135 | down | chr10:124913915-124924879 (+) // 96.92 // q26.13 |
| 1566691_at  |                        | -3.236911  | -1.6946177 | 3.236911  | down | chr14:95979384-95981481 (-) // 71.23 // q32.13   |
| 201853_s_at | <i>CDC25B</i>          | -3.2333045 | -1.6930094 | 3.2333045 | down | chr20:3776956-3786759 (+) // 94.16 // p13        |
| 209754_s_at | <i>TMPO</i>            | -3.2302377 | -1.6916404 | 3.2302377 | down | chr12:98940136-98942601 (+) // 97.88 // q23.1    |
| 201850_at   | <i>CAPG</i>            | -3.2297204 | -1.6914092 | 3.2297204 | down | chr2:85621890-85637474 (-) // 99.75 // p11.2     |
| 206925_at   | <i>ST8SIA4</i>         | -3.2292266 | -1.6911887 | 3.2292266 | down | chr5:100146948-100238871 (-) // 99.95 // q21.1   |
| 1564056_at  | <i>OTTHUMG00000176</i> | -3.2249875 | -1.6892936 | 3.2249875 | down | chr2:234259801-234262062 (-) // 36.49 // q37.1   |
| 221642_at   |                        | -3.2235873 | -1.688667  | 3.2235873 | down | chr3:48505604-48507284 (-) // 96.39 // p21.31    |

|              |                        |            |            |           |      |                                                       |
|--------------|------------------------|------------|------------|-----------|------|-------------------------------------------------------|
| 204674_at    | <i>LRMP</i>            | -3.2212846 | -1.6876361 | 3.2212846 | down | chr12:25205632-25261169 (+) // 95.66 // p12.1         |
| 222614_at    | <i>RWDD2B</i>          | -3.2183697 | -1.6863301 | 3.2183697 | down | chr21:30377994-30391692 (+) // 92.93 // q21.3         |
| 203907_s_at  | <i>IQSEC1</i>          | -3.2122655 | -1.6835911 | 3.2122655 | down | chr3:12939373-12983170 (-) // 99.83 // p25.2          |
| 1554740_a_at | <i>IPP</i>             | -3.2088888 | -1.6820738 | 3.2088888 | down | chr1:46159999-46216315 (-) // 98.57 // p34.1          |
| 212142_at    | <i>MCM4</i>            | -3.2087557 | -1.682014  | 3.2087557 | down | chr8:48873498-48891078 (+) // 83.89 // q11.21         |
| 36566_at     | <i>CTNS</i>            | -3.2081046 | -1.6817212 | 3.2081046 | down | chr17:3540015-3564828 (+) // 95.42 // p13.2           |
| 219978_s_at  | <i>NUSAP1</i>          | -3.2050989 | -1.6803689 | 3.2050989 | down | chr15:41625077-41650408 (+) // 98.15 // q15.1         |
| 218006_s_at  | <i>ZNF22</i>           | -3.2048545 | -1.6802589 | 3.2048545 | down | chr10:45498727-45499526 (+) // 99.75 // q11.21        |
| 226891_at    | <i>XXYL1</i>           | -3.2048473 | -1.6802557 | 3.2048473 | down | chr3:194789007-194790490 (-) // 50.99 // q29          |
| 220651_s_at  | <i>MCM10</i>           | -3.2027566 | -1.6793141 | 3.2027566 | down | chr10:13234281-13251839 (+) // 90.59 // p13           |
| 231873_at    | <i>BMPR2</i>           | -3.2009387 | -1.678495  | 3.2009387 | down | chr2:203426755-203429771 (+) // 71.06 // q33.2        |
| 1555973_at   |                        | -3.200155  | -1.6781418 | 3.200155  | down | chr11:126219176-126220172 (+) // 76.08 // q24.2       |
| 204032_at    | <i>BCAR3</i>           | -3.1995451 | -1.6778668 | 3.1995451 | down | chr1:94027350-94147202 (-) // 97.07 // p22.1          |
| 202806_at    | <i>DBN1</i>            | -3.1928442 | -1.6748421 | 3.1928442 | down | chr5:176883927-176900616 (-) // 98.32 // q35.3        |
| 230857_s_at  | <i>ZNF497</i>          | -3.1914306 | -1.6742033 | 3.1914306 | down | chr19:58865722-58866554 (-) // 56.36 // q13.43        |
| 1555974_a_at |                        | -3.190954  | -1.6739877 | 3.190954  | down | chr11:126219176-126220172 (+) // 76.08 // q24.2       |
| 203032_s_at  | <i>FH</i>              | -3.190853  | -1.6739422 | 3.190853  | down | chr1:241660908-241683054 (-) // 88.03 // q43          |
| 1560163_at   | <i>OTTHUMG00000177</i> | -3.1868074 | -1.6721119 | 3.1868074 | down | chr17:75440785-75443249 (+) // 50.53 // q25.3         |
| 206757_at    | <i>PDE5A</i>           | -3.1845798 | -1.671103  | 3.1845798 | down | chr4:120418478-120550146 (-) // 93.64 // q26          |
| 214829_at    | <i>AASS</i>            | -3.1806393 | -1.6693168 | 3.1806393 | down | chr7:121715556-121726207 (-) // 82.83 // q31.32       |
| 212020_s_at  | <i>MKI67</i>           | -3.1804757 | -1.6692426 | 3.1804757 | down | chr10:129894926-129924649 (-) // 98.21 // q26.2       |
| 219205_at    | <i>SRR</i>             | -3.1797438 | -1.6689105 | 3.1797438 | down | chr17:2218848-2228553 (+) // 88.98 // p13.3           |
| 226436_at    | <i>RASSF4</i>          | -3.173287  | -1.665978  | 3.173287  | down | chr10:45489567-45490162 (+) // 87.61 // q11.21        |
| 204165_at    | <i>WASF1</i>           | -3.173276  | -1.665973  | 3.173276  | down | chr6:110421021-110499916 (-) // 99.96 // q21          |
| 208515_at    | <i>HIST1H2BM</i>       | -3.1731923 | -1.6659349 | 3.1731923 | down | chr6:27782821-27783202 (+) // 100.0 // p22.1          |
| 241376_at    |                        | -3.170637  | -1.6647726 | 3.170637  | down | chr1:246934804-246935369 (+) // 75.49 // q44          |
|              |                        |            |            |           |      | chr1:154947213-154951722 (+) // 99.86 //              |
|              |                        |            |            |           |      | q21.3///chr10:29986863-29987572 (+) // 98.05 //       |
|              |                        |            |            |           |      | p11.23///chr11:82920432-82921148 (+) // 95.26 //      |
|              |                        |            |            |           |      | q14.1///chr14:96689436-96690153 (+) // 95.82 //       |
|              |                        |            |            |           |      | q32.2///chrX:30635567-30636278 (+) // 96.65 //        |
|              |                        |            |            |           |      | p21.2///chr5:61807600-61808309 (-) // 96.79 //        |
|              |                        |            |            |           |      | q12.1///chr8:81556698-81557415 (-) // 98.05 // q21.13 |
| 201897_s_at  | <i>CKS1B</i>           | -3.1692483 | -1.6641407 | 3.1692483 | down | chrY:21152525-21154962 (-) // 85.81 // q11.222        |
| 209771_x_at  | <i>CD24</i>            | -3.167518  | -1.6633527 | 3.167518  | down | chr4:26862564-27027003 (+) // 96.17 // p15.2          |
| 225250_at    | <i>STIM2</i>           | -3.1670275 | -1.6631293 | 3.1670275 | down | chr8:142217270-142229909 (-) // 98.3 // q24.3         |
| 225598_at    | <i>SLC45A4</i>         | -3.1621935 | -1.6609256 | 3.1621935 | down |                                                       |

|             |                          |            |            |           |      |                                                        |
|-------------|--------------------------|------------|------------|-----------|------|--------------------------------------------------------|
| 210768_x_at | <i>TMCO1</i>             | -3.1619077 | -1.6607952 | 3.1619077 | down | chr1:165696685-165737995 (-) // 96.91 // q24.1         |
| 204634_at   | <i>NEK4</i>              | -3.1569476 | -1.6585304 | 3.1569476 | down | chr3:52744802-52804939 (-) // 95.46 // p21.1           |
| 211779_x_at | <i>AP2A2</i>             | -3.150127  | -1.6554099 | 3.150127  | down | chr11:925880-1010919 (+) // 99.36 // p15.5             |
| 221521_s_at | <i>GINS2</i>             | -3.1492946 | -1.6550287 | 3.1492946 | down | chr16:85711280-85722588 (-) // 97.84 // q24.1          |
| 229827_at   | <i>BUB3</i>              | -3.1472328 | -1.6540838 | 3.1472328 | down | chr10:124913963-124922203 (-) // 93.83 // q26.13       |
| 204822_at   | <i>TTK</i>               | -3.141296  | -1.6513598 | 3.141296  | down | chr6:80714385-80752233 (+) // 75.74 // q14.1           |
| 35974_at    | <i>LRMP</i>              | -3.1408527 | -1.6511563 | 3.1408527 | down | chr12:25205632-25261267 (+) // 82.58 // p12.1          |
| 225399_at   | <i>TSEN15</i>            | -3.1330981 | -1.6475899 | 3.1330981 | down | chr1:184020796-184043342 (+) // 88.68 // q25.3         |
| 203022_at   | <i>RNASEH2A</i>          | -3.133009  | -1.6475489 | 3.133009  | down | chr19:12917438-12924340 (+) // 98.73 // p13.2          |
| 239253_at   |                          | -3.1315508 | -1.6468773 | 3.1315508 | down | chr10:58113406-58114338 (-) // 95.68 // q21.1          |
| 209198_s_at | <i>SYT11</i>             | -3.1296127 | -1.6459842 | 3.1296127 | down | chr1:155829369-155852752 (+) // 88.92 // q22           |
| 213234_at   | <i>KIAA1467</i>          | -3.1290157 | -1.6457089 | 3.1290157 | down | chr12:13214546-13236383 (+) // 91.67 // p13.1          |
| 226912_at   | <i>ZDHHC23</i>           | -3.1276143 | -1.6450626 | 3.1276143 | down | chr3:113678934-113681825 (+) // 98.63 // q13.31        |
| 225941_at   | <i>EIF4E3</i>            | -3.1229062 | -1.6428893 | 3.1229062 | down | chr3:71728271-71733079 (-) // 84.18 // p13             |
| 212159_x_at | <i>AP2A2</i>             | -3.122171  | -1.6425495 | 3.122171  | down | chr11:925862-1012240 (+) // 98.96 // p15.5             |
| 221011_s_at | <i>LBH</i>               | -3.1206014 | -1.6418241 | 3.1206014 | down | chr2:30454396-30482889 (+) // 97.87 // p23.1           |
| 219294_at   | <i>CENPQ</i>             | -3.1198392 | -1.6414716 | 3.1198392 | down | chr6:49448677-49460813 (+) // 99.92 // p12.3           |
| 230003_at   | <i>SLC16A7</i>           | -3.113636  | -1.6386003 | 3.113636  | down | chr12:60182880-60183635 (+) // 81.08 // q14.1          |
| 208650_s_at | <i>CD24</i>              | -3.112987  | -1.6382996 | 3.112987  | down | chrY:21152512-21154677 (-) // 75.65 // q11.222         |
| 223711_s_at | <i>THYN1</i>             | -3.1122553 | -1.6379604 | 3.1122553 | down | chr11:134118174-134123199 (-) // 99.5 // q25           |
| 201826_s_at | <i>SCCPDH</i>            | -3.1111672 | -1.6374559 | 3.1111672 | down | chr1:246887724-246931439 (+) // 99.44 // q44           |
| 227312_at   | <i>SNTB2</i>             | -3.109374  | -1.6366242 | 3.109374  | down | chr16:69340094-69341728 (+) // 65.78 // q22.1          |
| 206248_at   | <i>PRKCE</i>             | -3.1084301 | -1.6361861 | 3.1084301 | down | chr2:45879224-46412035 (+) // 99.96 // p21             |
| 209827_s_at | <i>IL16</i>              | -3.1053512 | -1.6347564 | 3.1053512 | down | chr15:81587466-81602116 (+) // 84.86 // q25.1          |
| 206398_s_at | <i>CD19</i>              | -3.104223  | -1.6342322 | 3.104223  | down | chr16:28943305-28950661 (+) // 96.72 // p11.2          |
| 239392_s_at | <i>POGK</i>              | -3.1038663 | -1.6340665 | 3.1038663 | down | chr1:166820271-166820692 (+) // 96.12 // q24.1         |
| 201825_s_at | <i>SCCPDH</i>            | -3.102773  | -1.6335582 | 3.102773  | down | chr1:246887356-246931439 (+) // 97.04 // q44           |
| 225313_at   | <i>FAM217B</i>           | -3.1000793 | -1.6323051 | 3.1000793 | down | chr20:58517177-58523726 (+) // 92.87 // q13.33         |
| 206364_at   | <i>KIF14</i>             | -3.0969234 | -1.6308357 | 3.0969234 | down | chr1:200521306-200589862 (-) // 94.75 // q32.1         |
| 1559481_at  | <i>CHIC1</i>             | -3.0966666 | -1.6307161 | 3.0966666 | down | chrX:72783344-72904244 (+) // 98.34 // q13.2           |
| 231887_s_at | <i>PALD1</i>             | -3.0950422 | -1.6299591 | 3.0950422 | down | chr10:72289668-72328205 (+) // 94.73 // q22.1          |
| 211502_s_at | <i>CDK14</i>             | -3.094553  | -1.629731  | 3.094553  | down | chr7:90225810-90836945 (+) // 99.46 // q21.13          |
| 224582_s_at | <i>NUCKS1</i>            | -3.0943868 | -1.6296536 | 3.0943868 | down | chr1:205682320-205686339 (-) // 95.13 // q32.1         |
|             |                          |            |            |           |      | chr5:175546562-175552168 (+) // 80.55 //               |
| 215133_s_at | <i>FAM153A///FAM153E</i> | -3.091492  | -1.6283033 | 3.091492  | down | q35.2///chr5:177140025-177145589 (-) // 79.77 // q35.3 |
| 219737_s_at | <i>PCDH9</i>             | -3.0873008 | -1.626346  | 3.0873008 | down | chr13:66876970-67802690 (-) // 97.01 // q21.32         |

|             |                          |            |            |           |      |                                                  |
|-------------|--------------------------|------------|------------|-----------|------|--------------------------------------------------|
| 202780_at   | <i>OXCT1</i>             | -3.0871878 | -1.6262932 | 3.0871878 | down | chr5:41730168-41870558 (-) // 99.31 // p13.1     |
| 205393_s_at | <i>CHEK1</i>             | -3.0859466 | -1.6257131 | 3.0859466 | down | chr11:125496642-125525571 (+) // 99.23 // q24.2  |
| 241606_s_at | <i>TRUB1</i>             | -3.0852098 | -1.6253686 | 3.0852098 | down | chr10:116697678-116730199 (+) // 92.33 // q25.3  |
| 225909_at   | <i>LOC728743///ZNF77</i> | -3.0824811 | -1.6240921 | 3.0824811 | down | chr7:150097789-150109557 (+) // 75.52 // q36.1   |
| 210983_s_at | <i>MCM7</i>              | -3.0779428 | -1.6219665 | 3.0779428 | down | chr7:99690918-99697360 (-) // 96.03 // q22.1     |
| 209132_s_at | <i>COMMD4</i>            | -3.0735424 | -1.6199024 | 3.0735424 | down | chr15:75628393-75634268 (+) // 52.41 // q24.2    |
| 225655_at   | <i>UHRF1</i>             | -3.0684206 | -1.6174963 | 3.0684206 | down | chr19:4910845-4962165 (+) // 95.75 // p13.3      |
| 1552696_at  | <i>NIPA1</i>             | -3.0652466 | -1.6160032 | 3.0652466 | down | chr15:23048315-23086436 (-) // 89.16 // q11.2    |
| 205147_x_at | <i>NCF4</i>              | -3.0642426 | -1.6155305 | 3.0642426 | down | chr22:37257057-37273960 (+) // 99.21 // q12.3    |
| 238695_s_at | <i>RAB39B</i>            | -3.0626922 | -1.6148003 | 3.0626922 | down | chrX:154488083-154489073 (-) // 86.92 // q28     |
| 222557_at   | <i>STMN3</i>             | -3.0602024 | -1.6136271 | 3.0602024 | down | chr20:62271062-62284801 (-) // 94.18 // q13.33   |
| 228485_s_at | <i>SLC44A1</i>           | -3.055846  | -1.6115718 | 3.055846  | down | chr9:108127855-108200785 (+) // 97.28 // q31.1   |
| 204202_at   | <i>IQCE</i>              | -3.0550468 | -1.6111945 | 3.0550468 | down | chr7:2649777-2654362 (+) // 96.09 // p22.3       |
| 218798_at   | <i>KRI1</i>              | -3.0496135 | -1.6086264 | 3.0496135 | down | chr19:10664266-10675683 (-) // 86.43 // p13.2    |
| 207237_at   | <i>KCNA3</i>             | -3.047168  | -1.6074691 | 3.047168  | down | chr1:111214309-111217362 (-) // 99.5 // p13.3    |
| 210052_s_at | <i>TPX2</i>              | -3.038131  | -1.6031841 | 3.038131  | down | chr20:30327130-30389295 (+) // 98.58 // q11.21   |
| 228390_at   | <i>RAB30</i>             | -3.0379636 | -1.6031046 | 3.0379636 | down | chr11:82685987-82687212 (-) // 76.02 // q14.1    |
| 200675_at   | <i>CD81</i>              | -3.037371  | -1.6028231 | 3.037371  | down | chr11:2398552-2418626 (+) // 86.5 // p15.5       |
| 204315_s_at | <i>GTSE1</i>             | -3.0332263 | -1.6008531 | 3.0332263 | down | chr22:46693275-46727629 (+) // 82.69 // q13.31   |
| 219885_at   | <i>SLFN12</i>            | -3.0328379 | -1.6006684 | 3.0328379 | down | chr17:33738087-33750089 (-) // 86.32 // q12      |
|             |                          |            |            |           |      | chr19:22817238-22850472 (+) // 77.92 //          |
|             |                          |            |            |           |      | p12//chr19:22571909-22586315 (-) // 76.66 // p12 |
| 215532_x_at | <i>ZNF492</i>            | -3.0318687 | -1.6002073 | 3.0318687 | down | chr17:15603328-15621238 (+) // 100.0 // p12      |
| 220250_at   | <i>ZNF286A</i>           | -3.031797  | -1.6001731 | 3.031797  | down | chrX:69664818-69722533 (+) // 96.03 // q13.1     |
| 207732_s_at | <i>DLG3</i>              | -3.028809  | -1.5987506 | 3.028809  | down | chr19:11708313-11729944 (+) // 92.2 // p13.2     |
| 224492_s_at | <i>ZNF627</i>            | -3.0269315 | -1.597856  | 3.0269315 | down | chr1:202848088-202858229 (-) // 85.08 // q32.1   |
| 204477_at   | <i>RAB1F</i>             | -3.0268314 | -1.5978084 | 3.0268314 | down | chr6:52362205-52441792 (-) // 92.91 // p12.2     |
| 202368_s_at | <i>TRAM2</i>             | -3.0251813 | -1.5970216 | 3.0251813 | down | chr3:160792420-160793799 (+) // 99.13 // q26.1   |
| 228457_at   | <i>PPM1L</i>             | -3.0192468 | -1.5941887 | 3.0192468 | down | chr1:228294387-228296954 (+) // 81.51 // q42.13  |
| 227024_s_at | <i>MRPL55</i>            | -3.0154443 | -1.5923706 | 3.0154443 | down | chr1:201452659-201476250 (-) // 96.7 // q32.1    |
| 200621_at   | <i>CSRP1</i>             | -3.0141346 | -1.5917438 | 3.0141346 | down | chr7:143554165-143599219 (-) // 98.44 // q35     |
| 210529_s_at | <i>FAM115A///LOC1002</i> | -3.0136569 | -1.5915152 | 3.0136569 | down | chr11:22842156-22842625 (-) // 79.14 // p14.3    |
| 230005_at   | <i>SVIP</i>              | -3.0117593 | -1.5906065 | 3.0117593 | down | chr10:125779167-125779523 (-) // 51.96 // q26.13 |
| 244874_at   | <i>CHST15</i>            | -3.0101745 | -1.5898471 | 3.0101745 | down | chr15:64653161-64653639 (-) // 86.4 // q22.31    |
| 242486_at   |                          | -3.0043452 | -1.5870506 | 3.0043452 | down | chr15:40915329-40956537 (+) // 96.51 // q15.1    |
| 228323_at   | <i>CASC5</i>             | -3.0023055 | -1.5860708 | 3.0023055 | down | chr6:138743179-138753179 (-) // 96.24 // q23.3   |
| 226490_at   | <i>NHSL1</i>             | -3.0002463 | -1.585081  | 3.0002463 | down |                                                  |



|              |                   |            |            |           |      |                                                 |
|--------------|-------------------|------------|------------|-----------|------|-------------------------------------------------|
| 209753_s_at  | TMPO              | -3.0002217 | -1.5850692 | 3.0002217 | down | chr12:98909370-98942743 (+) // 94.91 // q23.1   |
| 242665_at    | FMNL2             | -2.9946575 | -1.582391  | 2.9946575 | down | chr2:153463894-153475606 (+) // 99.84 // q23.3  |
| 201188_s_at  | ITPR3             | -2.993869  | -1.5820111 | 2.993869  | down | chr6:33589155-33663708 (+) // 99.58 // p21.31   |
| 1555766_a_at | GNG2              | -2.993757  | -1.5819571 | 2.993757  | down | chr14:52417396-52433405 (+) // 100.0 // q22.1   |
| 226271_at    | GDAP1             | -2.9926465 | -1.5814219 | 2.9926465 | down | chr8:75276653-75279114 (+) // 98.28 // q21.11   |
| 224604_at    | C4orf3            | -2.992099  | -1.5811579 | 2.992099  | down | chr4:120218423-120221838 (-) // 58.1 // q26     |
| 204890_s_at  | LCK               | -2.9920952 | -1.5811561 | 2.9920952 | down | chr1:32739806-32751342 (+) // 99.18 // p35.1    |
| 1554922_at   | ZNF678            | -2.9917245 | -1.5809773 | 2.9917245 | down | chr1:227751240-227844125 (+) // 92.01 // q42.13 |
| 232774_x_at  | ZIK1              | -2.9897096 | -1.5800054 | 2.9897096 | down | chr19:58099941-58102643 (+) // 100.0 // q13.43  |
| 231772_x_at  | CENPH             | -2.9878523 | -1.5791088 | 2.9878523 | down | chr5:68485374-68506148 (+) // 77.45 // q13.2    |
| 211052_s_at  | TBCD              | -2.98677   | -1.5785861 | 2.98677   | down | chr17:80709982-80900578 (+) // 98.19 // q25.3   |
| 228869_at    | SNX20             | -2.9854443 | -1.5779457 | 2.9854443 | down | chr16:50705536-50706097 (-) // 47.63 // q12.1   |
| 212212_s_at  | INTS1             | -2.9793897 | -1.5750169 | 2.9793897 | down | chr7:1509912-1533488 (-) // 98.16 // p22.3      |
| 235572_at    | SPC24             | -2.9790497 | -1.5748522 | 2.9790497 | down |                                                 |
| 236255_at    | PLEKHG4B          | -2.9786966 | -1.5746812 | 2.9786966 | down | chr5:184414-185017 (+) // 10.97 // p15.33       |
| 228570_at    | BTBD11            | -2.978312  | -1.574495  | 2.978312  | down | chr12:108052634-108053417 (+) // 97.51 // q23.3 |
| 204012_s_at  | LCMT2             | -2.9776611 | -1.5741795 | 2.9776611 | down | chr15:43618249-43622915 (-) // 60.92 // q15.3   |
| 223985_at    | FSD1L             | -2.9752445 | -1.5730083 | 2.9752445 | down | chr9:108210451-108234421 (+) // 100.0 // q31.2  |
| 215509_s_at  | BUB1              | -2.9736652 | -1.5722423 | 2.9736652 | down | chr2:111415790-111417701 (-) // 61.06 // q13    |
| 207677_s_at  | NCF4              | -2.9723868 | -1.5716219 | 2.9723868 | down | chr22:37257057-37273865 (+) // 99.37 // q12.3   |
| 204257_at    | FADS3             | -2.9723506 | -1.5716043 | 2.9723506 | down | chr11:61640998-61658986 (-) // 92.83 // q12.2   |
| 1556479_at   |                   | -2.971889  | -1.5713803 | 2.971889  | down | chr18:13471010-13472717 (+) // 93.3 // p11.21   |
| 201718_s_at  | EPB41L2           | -2.970768  | -1.570836  | 2.970768  | down | chr6:131160486-131384391 (-) // 96.76 // q23.1  |
| 242458_at    | RALGPS2           | -2.9704456 | -1.5706794 | 2.9704456 | down | chr1:178886170-178886872 (+) // 93.69 // q25.2  |
| 222962_s_at  | MCM10             | -2.9701688 | -1.570545  | 2.9701688 | down | chr10:13206126-13252311 (+) // 89.41 // p13     |
| 221790_s_at  | LDLRAP1           | -2.9682543 | -1.5696148 | 2.9682543 | down | chr1:25870111-25895377 (+) // 92.83 // p36.11   |
| 1557078_at   | SLFN5             | -2.9678745 | -1.5694301 | 2.9678745 | down | chr17:33570090-33592579 (+) // 99.64 // q12     |
| 242957_at    | VWCE              | -2.9659402 | -1.5684896 | 2.9659402 | down | chr11:61025761-61026208 (-) // 95.31 // q12.2   |
| 224608_s_at  | VPS25             | -2.9656858 | -1.5683658 | 2.9656858 | down | chr17:40925453-40931616 (+) // 96.49 // q21.31  |
| 221258_s_at  | KIF18A            | -2.9656188 | -1.5683331 | 2.9656188 | down | chr11:28042549-28129693 (-) // 99.7 // p14.1    |
| 229671_s_at  | MIS18A            | -2.9638813 | -1.5674876 | 2.9638813 | down | chr21:33641261-33651041 (+) // 94.64 // q22.11  |
| 235152_at    | AP001258.4//OTTHI | -2.963152  | -1.5671326 | 2.963152  | down | chr11:58902367-58910190 (-) // 43.55 // q12.1   |
| 228792_at    | OTTHUMG00000172   | -2.9624016 | -1.5667672 | 2.9624016 | down | chr15:48426828-48428628 (-) // 95.22 // q21.1   |
| 239877_at    | LOC157740         | -2.96096   | -1.566065  | 2.96096   | down | chr8:11140992-11141683 (-) // 97.85 // p23.1    |
| 223155_at    | HDHD2             | -2.96051   | -1.5658457 | 2.96051   | down | chr18:44633781-44676862 (-) // 93.12 // q21.1   |
| 239232_at    | MSI2              | -2.9598603 | -1.5655291 | 2.9598603 | down | chr17:55345223-55345899 (+) // 45.88 // q22     |

|              |                  |            |            |           |      |                                                     |
|--------------|------------------|------------|------------|-----------|------|-----------------------------------------------------|
| 215942_s_at  | GTSE1            | -2.9550645 | -1.5631896 | 2.9550645 | down | chr22:46721734-46726352 (+) // 78.42 // q13.31      |
| 209642_at    | BUB1             | -2.9535863 | -1.5624678 | 2.9535863 | down | chr2:111395518-111435605 (-) // 99.4 // q13         |
| 202153_s_at  | NUP62            | -2.9470177 | -1.5592557 | 2.9470177 | down | chr19:50410086-50432710 (-) // 80.09 // q13.33      |
| 236759_at    |                  | -2.943682  | -1.5576218 | 2.943682  | down | chr1:41123702-41124254 (-) // 95.15 // p34.2        |
| 216080_s_at  | FADS3            | -2.939052  | -1.5553509 | 2.939052  | down | chr11:61643320-61653789 (-) // 96.92 // q12.2       |
| 219076_s_at  | PXMP2            | -2.9390256 | -1.5553379 | 2.9390256 | down | chr12:133264191-133281576 (+) // 97.75 // q24.33    |
| 1557455_s_at | MOSPD1           | -2.9320984 | -1.5519335 | 2.9320984 | down | chrX:134033056-134049251 (-) // 81.03 // q26.3      |
| 242136_x_at  | MGC70870         | -2.931128  | -1.551456  | 2.931128  | down | chr17_gl000205_random:119461-119733 (+) // 62.5 //  |
| 200683_s_at  | UBE2L3           | -2.9305074 | -1.5511504 | 2.9305074 | down | chr22:21922007-21978323 (+) // 95.93 // q11.21      |
| 210852_s_at  | AASS             | -2.9262135 | -1.5490351 | 2.9262135 | down | chr7:121716295-121784268 (-) // 99.97 // q31.32     |
| 1557289_s_at | GTF2IRD2//GTF2IR | -2.9195013 | -1.545722  | 2.9195013 | down | chr7:74236396-74267855 (-) // 65.3 // q11.23        |
| 203612_at    | BYSL             | -2.9190598 | -1.5455037 | 2.9190598 | down | chr6:41895232-41900782 (+) // 99.76 // p21.1        |
| 222742_s_at  | RABL5            | -2.9183378 | -1.545147  | 2.9183378 | down | chr7:100956556-100965078 (-) // 42.37 // q22.1      |
| 227568_at    | HECTD2           | -2.9179797 | -1.5449698 | 2.9179797 | down | chr10:93272327-93274515 (+) // 98.78 // q23.32      |
| 1553696_s_at | ZNF569           | -2.9169674 | -1.5444692 | 2.9169674 | down | chr19:37902058-37958339 (-) // 70.56 // q13.12      |
| 208893_s_at  | DUSP6            | -2.9162788 | -1.5441287 | 2.9162788 | down | chr12:89742405-89746240 (-) // 99.14 // q21.33      |
| 1559289_at   | TADA1            | -2.9162264 | -1.5441027 | 2.9162264 | down | chr1:166832950-166835169 (+) // 44.86 // q24.1      |
| 212282_at    | TMEM97           | -2.9043796 | -1.5382301 | 2.9043796 | down | chr17:26646128-26655404 (+) // 84.6 // q11.2        |
| 215774_s_at  | SUCLG2           | -2.9043722 | -1.5382264 | 2.9043722 | down | chr3:67425142-67705002 (+) // 96.43 // p14.1        |
| 201968_s_at  | PGM1             | -2.9002182 | -1.5361614 | 2.9002182 | down | chr1:64059099-64125915 (+) // 99.83 // p31.3        |
| 212281_s_at  | TMEM97           | -2.8994489 | -1.5357786 | 2.8994489 | down | chr17:26646128-26655404 (+) // 84.6 // q11.2        |
| 213587_s_at  | ATP6VOE2         | -2.8991663 | -1.5356381 | 2.8991663 | down | chr7:149577303-149577784 (+) // 94.44 // q36.1      |
| 209482_at    | POP7             | -2.8969264 | -1.534523  | 2.8969264 | down | chr7:100303765-100305109 (+) // 96.84 // q22.1      |
| 212315_s_at  | NUP210           | -2.8924253 | -1.5322797 | 2.8924253 | down | chr3:13357734-13384804 (-) // 98.4 // p25.1         |
| 212813_at    | JAM3             | -2.8905623 | -1.5313501 | 2.8905623 | down | chr11:134018528-134021896 (+) // 98.82 // q25       |
| 213174_at    | TTC9             | -2.8852365 | -1.5286896 | 2.8852365 | down | chr14:71108503-71141798 (+) // 75.25 // q24.2       |
| 217787_s_at  | GALNT2           | -2.8827107 | -1.527426  | 2.8827107 | down | chr1:230202984-230417946 (+) // 97.17 // q42.13     |
| 219918_s_at  | ASPM             | -2.8824158 | -1.5272784 | 2.8824158 | down | chr1:197053391-197071766 (-) // 99.72 // q31.3      |
| 211713_x_at  | KIAA0101         | -2.8791547 | -1.5256453 | 2.8791547 | down | chr15:64657212-64673629 (-) // 72.02 // q22.31      |
| 218741_at    | CENPM            | -2.8782535 | -1.5251937 | 2.8782535 | down | chr22:42334741-42343115 (-) // 82.23 // q13.2       |
|              |                  |            |            |           |      | chr18:23748474-23751305 (-) // 48.75 //             |
| 202532_s_at  | DHFR             | -2.8754358 | -1.5237806 | 2.8754358 | down | q11.2//chr5:79922693-79950363 (-) // 48.12 // q14.1 |
| 235048_at    | FAM169A          | -2.872425  | -1.5222692 | 2.872425  | down | chr5:74073342-74074884 (-) // 98.4 // q13.3         |
| 48808_at     | DHFR             | -2.8695693 | -1.5208342 | 2.8695693 | down | chr18:23747827-23748955 (-) // 29.97 // q11.2       |

|              |                    |            |            |           |      |
|--------------|--------------------|------------|------------|-----------|------|
| 220602_s_at  | LOC388152///LOC64  | -2.8678114 | -1.5199502 | 2.8678114 | down |
| 230836_at    | ST8SIA4            | -2.8672214 | -1.5196533 | 2.8672214 | down |
| 226865_at    | LOC100509635       | -2.8658886 | -1.5189825 | 2.8658886 | down |
| 235905_at    | ZNF704             | -2.8644593 | -1.5182629 | 2.8644593 | down |
| 1554383_a_at | TRAM2              | -2.8643603 | -1.518213  | 2.8643603 | down |
| 218029_at    | FAM65A             | -2.8614602 | -1.5167515 | 2.8614602 | down |
| 224944_at    | TMPO               | -2.8606625 | -1.5163493 | 2.8606625 | down |
| 1565666_s_at | MUC6               | -2.857485  | -1.514746  | 2.857485  | down |
| 204478_s_at  | RAB1F              | -2.857409  | -1.5147076 | 2.857409  | down |
| 229285_at    | RNASEL             | -2.8568459 | -1.5144233 | 2.8568459 | down |
| 210807_s_at  | SLC16A7            | -2.8521652 | -1.5120575 | 2.8521652 | down |
| 204510_at    | CDC7               | -2.8515363 | -1.5117394 | 2.8515363 | down |
| 219136_s_at  | LMF1               | -2.8505452 | -1.5112379 | 2.8505452 | down |
| 217165_x_at  | MT1F               | -2.8504772 | -1.5112035 | 2.8504772 | down |
| 233250_x_at  | FOXRED2            | -2.8491616 | -1.5105375 | 2.8491616 | down |
| 229487_at    | EBF1               | -2.84689   | -1.5093868 | 2.84689   | down |
| 1566517_at   |                    | -2.8444145 | -1.5081317 | 2.8444145 | down |
| 225400_at    | TSEN15             | -2.8404944 | -1.506142  | 2.8404944 | down |
| 231146_at    | FAM24B             | -2.8391676 | -1.505468  | 2.8391676 | down |
| 203274_at    | F8A1///F8A2///F8A3 | -2.8387043 | -1.5052326 | 2.8387043 | down |
| 204569_at    | ICK                | -2.838242  | -1.5049976 | 2.838242  | down |
| 204044_at    | QPRT               | -2.8381119 | -1.5049314 | 2.8381119 | down |
| 1554271_a_at | CENPL              | -2.8314655 | -1.5015489 | 2.8314655 | down |
| 226242_at    | C1orf131           | -2.829708  | -1.5006533 | 2.829708  | down |
| 203144_s_at  | KIAA0040           | -2.8296764 | -1.500637  | 2.8296764 | down |
| 219715_s_at  | TDP1               | -2.8281448 | -1.499856  | 2.8281448 | down |
| 238546_at    | SLC8A1             | -2.8237455 | -1.4976101 | 2.8237455 | down |
| 217223_s_at  | BCR                | -2.819272  | -1.4953227 | 2.819272  | down |
| 236928_at    |                    | -2.8166454 | -1.4939779 | 2.8166454 | down |
| 219123_at    | ZNF232             | -2.815401  | -1.4933405 | 2.815401  | down |

chr15:82944960-82975797 (+) // 95.25 //  
q25.2///chr15:82764078-82798184 (-) // 95.72 //  
q25.2///chr15:83140664-83182762 (-) // 95.29 //  
q25.2///chr15:84868063-84898722 (-) // 97.68 //  
q25.2///chr15:85747140-85777828 (-) // 94.5 // q25.3  
chr5:100142639-100143363 (-) // 98.5 // q21.1  
chr10:20575769-20578025 (+) // 89.46 // p12.31  
chr8:81545004-81545997 (-) // 93.75 // q21.13  
chr6:52367770-52441862 (-) // 85.3 // p12.2  
chr16:67573772-67580682 (+) // 99.86 // q22.1  
chr12:98943062-98944129 (+) // 81.7 // q23.1  
chr11:1017309-1018192 (-) // 88.05 // p15.5  
chr1:202849587-202858237 (-) // 96.75 // q32.1  
chr1:182542771-182543229 (-) // 58.92 // q25.3  
chr12:59989987-60173770 (+) // 99.58 // q14.1  
chr1:91966443-91991313 (+) // 93.86 // p22.2  
chr16:903637-1020982 (-) // 98.65 // p13.3  
chr16:56691970-56693076 (+) // 100.0 // q12.2  
chr22:36886073-36894238 (-) // 99.84 // q12.3  
chr5:158122928-158123697 (-) // 92.78 // q33.3  
chr4:154536683-154539645 (-) // 62.36 // q31.3  
chr1:184020796-184043342 (+) // 88.68 // q25.3  
chr10:124608611-124639121 (-) // 97.64 // q26.13  
chrX:154114592-154116335 (+) // 93.69 //  
q28///chrX:154611706-154613449 (+) // 93.57 //  
q28///chrX:154686575-154688318 (-) // 93.57 // q28  
chr6:52866097-52926487 (-) // 92.33 // p12.2  
chr16:29690474-29708956 (+) // 85.36 // p11.2  
chr1:173769017-173793271 (-) // 80.11 // q25.1  
chr1:231359510-231376913 (-) // 97.26 // q42.2  
chr1:175126122-175161929 (-) // 93.21 // q25.1  
chr14:90429448-90509688 (+) // 98.45 // q32.11  
chr2:40339812-40341032 (-) // 90.5 // p22.1  
chr22:23540437-23657709 (+) // 100.0 // q11.23  
chr4:56794931-56795650 (-) // 19.73 // q12  
chr17:5009032-5015161 (-) // 100.0 // p13.2

|              |                                   |            |            |           |      |                                                  |
|--------------|-----------------------------------|------------|------------|-----------|------|--------------------------------------------------|
| 214995_s_at  | <i>APOBEC3F</i> /// <i>APOB</i>   | -2.8153427 | -1.4933106 | 2.8153427 | down | chr22:39436700-39440427 (+) // 77.71 // q13.1    |
| 227243_s_at  | <i>EBF3</i>                       | -2.81375   | -1.4924941 | 2.81375   | down | chr10:131633495-131762105 (-) // 99.17 // q26.3  |
| 218039_at    | <i>NUSAP1</i>                     | -2.813517  | -1.4923748 | 2.813517  | down | chr15:41625087-41673243 (+) // 97.13 // q15.1    |
| 244786_at    | <i>SNHG10</i>                     | -2.8128722 | -1.492044  | 2.8128722 | down | chr14:95999248-96000199 (-) // 82.54 // q32.13   |
| 205194_at    | <i>PSPH</i>                       | -2.8120995 | -1.4916476 | 2.8120995 | down | chr7:56078745-56183957 (-) // 76.75 // p11.2     |
| 229681_at    |                                   | -2.8081956 | -1.4896435 | 2.8081956 | down | chr17:75442972-75443818 (-) // 60.78 // q25.3    |
| 214562_at    | <i>HIST1H4A</i> /// <i>HIST1H</i> | -2.8068953 | -1.4889753 | 2.8068953 | down | chr6:27840934-27841289 (-) // 91.83 // p22.1     |
| 212949_at    | <i>NCAPH</i>                      | -2.806061  | -1.4885464 | 2.806061  | down | chr2:97001503-97039572 (+) // 97.37 // q11.2     |
| 204205_at    | <i>APOBEC3G</i>                   | -2.8032827 | -1.4871173 | 2.8032827 | down | chr22:39473135-39483747 (+) // 99.36 // q13.1    |
| 205394_at    | <i>CHEK1</i>                      | -2.79541   | -1.4830599 | 2.79541   | down | chr11:125496642-125525571 (+) // 99.23 // q24.2  |
| 218394_at    | <i>ROGDI</i>                      | -2.7948658 | -1.482779  | 2.7948658 | down | chr16:4846969-4852674 (-) // 92.81 // p13.3      |
| 218967_s_at  | <i>PTER</i>                       | -2.7902577 | -1.4803984 | 2.7902577 | down | chr10:16526335-16554059 (+) // 94.09 // p13      |
| 202503_s_at  | <i>KIAA0101</i>                   | -2.7898803 | -1.4802033 | 2.7898803 | down | chr15:64657789-64673631 (-) // 100.0 // q22.31   |
| 230640_at    |                                   | -2.7887177 | -1.479602  | 2.7887177 | down | chr12:50030281-50030752 (-) // 95.93 // q13.12   |
| 217124_at    | <i>IQCE</i>                       | -2.7886062 | -1.4795442 | 2.7886062 | down | chr7:2598771-2649903 (+) // 93.94 // p22.3       |
| 213631_x_at  | <i>DHODH</i>                      | -2.7869866 | -1.4787061 | 2.7869866 | down | chr16:72042744-72059119 (+) // 82.29 // q22.2    |
| 227533_at    |                                   | -2.7864277 | -1.4784168 | 2.7864277 | down | chr1:178890258-178890974 (+) // 97.28 // q25.2   |
| 213623_at    | <i>KIF3A</i>                      | -2.7832289 | -1.4767596 | 2.7832289 | down | chr5:132031784-132073236 (-) // 96.0 // q31.1    |
| 219292_at    | <i>THAP1</i>                      | -2.7826257 | -1.4764469 | 2.7826257 | down | chr8:42691813-42698468 (-) // 97.32 // p11.21    |
| 1559059_s_at | <i>ZNF611</i>                     | -2.7825394 | -1.476402  | 2.7825394 | down | chr19:53204822-53206435 (-) // 44.42 // q13.41   |
| 1553120_at   | <i>CLSPN</i>                      | -2.7806246 | -1.475409  | 2.7806246 | down | chr1:36201793-36235568 (-) // 95.74 // p34.3     |
| 1553055_a_at | <i>SLFN5</i>                      | -2.7792208 | -1.4746804 | 2.7792208 | down | chr17:33570107-33586838 (+) // 97.07 // q12      |
| 236272_at    | <i>UNC119B</i>                    | -2.7776186 | -1.4738486 | 2.7776186 | down | chr12:121148301-121154533 (-) // 97.96 // q24.31 |
| 213945_s_at  | <i>NUP210</i>                     | -2.7740192 | -1.4719778 | 2.7740192 | down | chr3:13357734-13358343 (+) // 99.18 // p25.1     |
| 201487_at    | <i>CTSC</i>                       | -2.7711577 | -1.4704888 | 2.7711577 | down | chr11:88026760-88070873 (-) // 98.37 // q14.2    |
| 204215_at    | <i>TMEM243</i>                    | -2.7702866 | -1.4700352 | 2.7702866 | down | chr7:86825479-86849032 (-) // 93.32 // q21.12    |
| 231585_at    | <i>VPS13A</i>                     | -2.7686388 | -1.4691769 | 2.7686388 | down | chr9:80031460-80031943 (-) // 92.55 // q21.2     |
| 225305_at    | <i>SLC25A29</i>                   | -2.767806  | -1.4687428 | 2.767806  | down | chr14:100757454-100772801 (-) // 91.57 // q32.2  |
| 217788_s_at  | <i>GALNT2</i>                     | -2.764794  | -1.467172  | 2.764794  | down | chr1:230203027-230417946 (+) // 98.25 // q42.13  |
| 203940_s_at  | <i>VASH1</i>                      | -2.762339  | -1.4658904 | 2.762339  | down | chr14:77228779-77249359 (+) // 92.12 // q24.3    |
| 219032_x_at  | <i>OPN3</i>                       | -2.7623017 | -1.4658709 | 2.7623017 | down | chr1:241756914-241803611 (-) // 81.09 // q43     |
| 225719_s_at  | <i>MRPL55</i>                     | -2.7589872 | -1.4641387 | 2.7589872 | down | chr1:228294385-228296994 (-) // 81.67 // q42.13  |
| 1553652_a_at | <i>C18orf54</i>                   | -2.7580361 | -1.4636414 | 2.7580361 | down | chr18:51884954-51904707 (+) // 86.61 // q21.2    |
| 213135_at    | <i>TIAM1</i>                      | -2.7543812 | -1.4617282 | 2.7543812 | down | chr21:32490735-32492552 (-) // 96.71 // q22.11   |
| 211709_s_at  | <i>CLEC11A</i>                    | -2.753381  | -1.4612043 | 2.753381  | down | chr19:51226639-51228964 (+) // 90.74 // q13.33   |
| 226685_at    | <i>SNTB2</i>                      | -2.7515104 | -1.4602238 | 2.7515104 | down | chr16:69342417-69342954 (+) // 96.24 // q22.1    |

|              |                         |            |            |           |      |                                                 |
|--------------|-------------------------|------------|------------|-----------|------|-------------------------------------------------|
| 222821_s_at  | <i>GEMIN7</i>           | -2.7512114 | -1.460067  | 2.7512114 | down | chr19:45582539-45594836 (+) // 98.94 // q13.32  |
| 204411_at    | <i>KIF21B</i>           | -2.7478614 | -1.4583092 | 2.7478614 | down | chr1:200938519-200942179 (-) // 98.72 // q32.1  |
| 205484_at    | <i>SIT1</i>             | -2.745919  | -1.4572891 | 2.745919  | down | chr9:35649294-35650937 (-) // 99.59 // p13.3    |
| 204070_at    | <i>RARRES3</i>          | -2.744994  | -1.456803  | 2.744994  | down | chr11:63304279-63313929 (+) // 98.05 // q12.3   |
| 233198_at    | <i>GOLGA2P5</i>         | -2.7440093 | -1.4562854 | 2.7440093 | down | chr12:100557089-100558238 (-) // 35.82 // q23.1 |
| 218300_at    | <i>PAGR1</i>            | -2.7436323 | -1.4560871 | 2.7436323 | down | chr16:29827831-29831434 (+) // 97.1 // p11.2    |
| 219677_at    | <i>SPSB1</i>            | -2.743232  | -1.4558766 | 2.743232  | down | chr1:9352940-9429588 (+) // 94.05 // p36.22     |
| 207128_s_at  | <i>ZNF223</i>           | -2.7420726 | -1.4552667 | 2.7420726 | down | chr19:44556220-44571772 (+) // 77.42 // q13.31  |
| 215343_at    | <i>CCDC88C</i>          | -2.741416  | -1.4549212 | 2.741416  | down | chr14:91844985-91884152 (-) // 67.47 // q32.11  |
| 221969_at    | <i>PAX5</i>             | -2.7394047 | -1.4538624 | 2.7394047 | down | chr9:36833764-36835625 (-) // 93.95 // p13.2    |
| 209052_s_at  | <i>WHSC1</i>            | -2.739146  | -1.4537262 | 2.739146  | down | chr4:1894508-1983930 (+) // 95.93 // p16.3      |
| 229838_at    | <i>NUCB2</i>            | -2.7383087 | -1.4532851 | 2.7383087 | down | chr11:17370980-17371527 (+) // 43.25 // p15.1   |
| 214509_at    | <i>HIST1H3A//HIST1H</i> | -2.7378411 | -1.4530387 | 2.7378411 | down | chr6:27839623-27840099 (-) // 100.0 // p22.1    |
| 242056_at    | <i>TRIM45</i>           | -2.7369368 | -1.4525621 | 2.7369368 | down | chr1:117653683-117654337 (-) // 88.72 // p13.1  |
| 1555848_at   | <i>RBM18</i>            | -2.7359493 | -1.4520415 | 2.7359493 | down |                                                 |
| 209129_at    | <i>TRIP6</i>            | -2.7358186 | -1.4519726 | 2.7358186 | down | chr7:100464973-100471070 (+) // 97.38 // q22.1  |
| 1555841_at   | <i>MSANTD3</i>          | -2.7354684 | -1.4517878 | 2.7354684 | down | chr9:103204430-103214014 (+) // 64.72 // q31.1  |
| 235079_at    | <i>ZNF704</i>           | -2.7350206 | -1.4515517 | 2.7350206 | down | chr8:81547642-81549264 (-) // 97.26 // q21.13   |
| 202502_at    | <i>ACADM</i>            | -2.7328632 | -1.4504132 | 2.7328632 | down | chr1:76189082-76229183 (+) // 94.01 // p31.1    |
| 238461_at    | <i>EIF4E3</i>           | -2.7323573 | -1.4501461 | 2.7323573 | down | chr3:71732989-71739295 (-) // 99.71 // p13      |
| 224708_at    | <i>KIAA2013</i>         | -2.7320287 | -1.4499726 | 2.7320287 | down | chr1:11979647-11986453 (-) // 95.34 // p36.22   |
| 205189_s_at  | <i>FANCC</i>            | -2.7320163 | -1.4499661 | 2.7320163 | down | chr9:97861336-98079984 (-) // 91.33 // q22.32   |
| 204836_at    | <i>GLDC</i>             | -2.7292209 | -1.4484892 | 2.7292209 | down | chr9:6532468-6645650 (-) // 98.31 // p24.1      |
| 204020_at    | <i>PURA</i>             | -2.72907   | -1.4484093 | 2.72907   | down | chr5:139493707-139496418 (+) // 88.32 // q31.2  |
| 203478_at    | <i>NDUFC1</i>           | -2.7281501 | -1.4479231 | 2.7281501 | down | chr4:140211091-140216958 (-) // 93.42 // q31.1  |
| 1556480_a_at |                         | -2.7280905 | -1.4478915 | 2.7280905 | down | chr18:13471010-13472717 (+) // 93.3 // p11.21   |
| 205235_s_at  | <i>KIF20B</i>           | -2.7238607 | -1.445653  | 2.7238607 | down | chr10:91461391-91534690 (+) // 93.65 // q23.31  |
| 223553_s_at  | <i>DOK3</i>             | -2.7213984 | -1.4443481 | 2.7213984 | down | chr5:176928907-176937386 (-) // 43.11 // q35.3  |
| 225240_s_at  | <i>MSI2</i>             | -2.721087  | -1.4441831 | 2.721087  | down | chr17:55693354-55760253 (+) // 94.4 // q22      |
| 218573_at    | <i>MAGEH1</i>           | -2.7192907 | -1.4432304 | 2.7192907 | down | chrX:55478537-55479961 (+) // 96.41 // p11.21   |
| 240239_at    | <i>ZNF566</i>           | -2.7192862 | -1.443228  | 2.7192862 | down | chr19:36938536-36939234 (-) // 79.29 // q13.12  |
| 222697_s_at  | <i>ABHD10</i>           | -2.7179496 | -1.4425187 | 2.7179496 | down | chr3:111697843-111712051 (+) // 71.98 // q13.2  |
| 204835_at    | <i>POLA1</i>            | -2.71704   | -1.4420358 | 2.71704   | down | chrX:24712063-25015100 (+) // 98.97 // p22.11   |
| 231085_s_at  | <i>AC006077.3//OTTH</i> | -2.714104  | -1.440476  | 2.714104  | down | chr5:134240924-134241381 (+) // 100.0 // q31.1  |
| 202338_at    | <i>TK1</i>              | -2.7130306 | -1.4399053 | 2.7130306 | down | chr17:76170180-76183131 (-) // 99.65 // q25.3   |
| 228552_s_at  | <i>ISYNA1</i>           | -2.7105494 | -1.4385853 | 2.7105494 | down | chr19:18544585-18545378 (-) // 100.0 // p13.11  |

|              |                          |            |            |           |      |                                                      |
|--------------|--------------------------|------------|------------|-----------|------|------------------------------------------------------|
| 227286_at    | <i>INO80E</i>            | -2.7101011 | -1.4383466 | 2.7101011 | down | chr16:30016390-30017111 (+) // 95.99 // p11.2        |
| 212322_at    | <i>SGPL1</i>             | -2.709205  | -1.4378695 | 2.709205  | down | chr10:72575725-72640946 (+) // 93.41 // q22.1        |
| 225939_at    | <i>EIF4E3</i>            | -2.7074208 | -1.4369192 | 2.7074208 | down | chr3:71728271-71733079 (-) // 84.18 // p13           |
| 210567_s_at  | <i>SKP2</i>              | -2.7073672 | -1.4368906 | 2.7073672 | down | chr5:36152225-36184143 (+) // 97.77 // p13.2         |
| 205692_s_at  | <i>CD38</i>              | -2.7068398 | -1.4366095 | 2.7068398 | down | chr4:15779974-15850486 (+) // 99.27 // p15.32        |
| 213444_at    | <i>ZNF862</i>            | -2.7050257 | -1.4356422 | 2.7050257 | down | chr7:149543276-149564567 (+) // 98.05 // q36.1       |
| 222590_s_at  | <i>NLK</i>               | -2.7049942 | -1.4356256 | 2.7049942 | down | chr17:26369689-26521921 (+) // 95.91 // q11.2        |
| 220035_at    | <i>NUP210</i>            | -2.6961246 | -1.4308871 | 2.6961246 | down | chr3:13393177-13417851 (-) // 92.97 // p25.1         |
| 1553677_a_at | <i>TIPRL</i>             | -2.6950045 | -1.4302877 | 2.6950045 | down | chr1:168148176-168169885 (+) // 98.15 // q24.2       |
| 222416_at    | <i>ALDH18A1</i>          | -2.6902733 | -1.4277527 | 2.6902733 | down | chr10:97365701-97413164 (-) // 98.99 // q24.1        |
| 227721_at    | <i>CPAMD8</i>            | -2.6901278 | -1.4276748 | 2.6901278 | down | chr19:17003757-17137450 (-) // 96.6 // p13.11        |
| 242354_at    | <i>OTTHUMG00000172</i>   | -2.6896598 | -1.4274237 | 2.6896598 | down |                                                      |
| 203146_s_at  | <i>GABBR1</i>            | -2.6881623 | -1.4266202 | 2.6881623 | down | chr6:29570005-29600860 (-) // 95.91 // p22.1         |
| 240711_at    |                          | -2.6834311 | -1.4240788 | 2.6834311 | down | chr3:158262452-158262917 (-) // 99.79 // q25.32      |
| 203379_at    | <i>RPS6KA1</i>           | -2.6832774 | -1.4239962 | 2.6832774 | down | chr1:26856360-26901500 (+) // 99.61 // p36.11        |
| 1555751_a_at | <i>GEMIN7</i>            | -2.6823516 | -1.4234984 | 2.6823516 | down | chr19:45593372-45593768 (+) // 100.0 // q13.32       |
| 205851_at    | <i>NME6</i>              | -2.6821542 | -1.4233922 | 2.6821542 | down | chr3:48335590-48342849 (-) // 74.87 // p21.31        |
| 217791_s_at  | <i>ALDH18A1</i>          | -2.6816819 | -1.4231381 | 2.6816819 | down | chr10:97366136-97416463 (-) // 99.66 // q24.1        |
| 203795_s_at  | <i>BCL7A</i>             | -2.6813478 | -1.4229584 | 2.6813478 | down | chr12:122459026-122499948 (+) // 96.22 // q24.31     |
| 235953_at    | <i>ZNF610</i>            | -2.680429  | -1.4224639 | 2.680429  | down | chr19:52869659-52870375 (+) // 97.38 // q13.41       |
| 223728_at    | <i>CENPBD1</i>           | -2.6798956 | -1.4221768 | 2.6798956 | down | chr16:90036201-90037259 (-) // 55.87 // q24.3        |
| 214779_s_at  | <i>SGSM3</i>             | -2.677945  | -1.4211262 | 2.677945  | down | chr22:40799917-40806289 (+) // 93.96 // q13.1        |
| 202650_s_at  | <i>KIAA0195</i>          | -2.6764512 | -1.4203213 | 2.6764512 | down | chr17:73452735-73496163 (+) // 99.98 // q25.1        |
| 201308_s_at  |                          | -2.67288   | -1.418395  | 2.67288   | down | chr4:77870963-77957127 (+) // 99.09 // q21.1         |
| 230006_s_at  | <i>SVIP</i>              | -2.6709895 | -1.4173743 | 2.6709895 | down | chr11:22842156-22842625 (-) // 79.14 // p14.3        |
| 209484_s_at  | <i>NSL1</i>              | -2.670667  | -1.4172001 | 2.670667  | down | chr1:212911084-212965111 (-) // 99.21 // q32.3       |
| 217426_at    |                          | -2.6699362 | -1.4168053 | 2.6699362 | down | chr8:120846304-120846904 (+) // 64.81 // q24.12      |
| 226718_at    | <i>AMIGO1</i>            | -2.6697774 | -1.4167194 | 2.6697774 | down | chr1:110046799-110051368 (-) // 98.85 // p13.3       |
| 200846_s_at  | <i>PPP1CA</i>            | -2.669391  | -1.4165106 | 2.669391  | down | chr11:67165657-67169288 (-) // 97.38 // q13.2        |
| 225244_at    | <i>LOC100130093///SN</i> | -2.6686304 | -1.4160994 | 2.6686304 | down | chr1:227916326-227968927 (+) // 98.4 // q42.13       |
|              |                          |            |            |           |      | chrX:101033972-101035285 (+) // 98.05 //             |
| 215975_x_at  | <i>GK-AS1///GK-AS1</i>   | -2.6677754 | -1.4156373 | 2.6677754 | down | q22.1///chrX:30686204-30742275 (-) // 99.92 // p21.2 |
| 226339_at    | <i>TRUB1</i>             | -2.6676116 | -1.4155486 | 2.6676116 | down | chr10:116735384-116737435 (+) // 92.71 // q25.3      |
| 224605_at    | <i>C4orf3</i>            | -2.6660428 | -1.4146999 | 2.6660428 | down | chr4:120218423-120221838 (-) // 58.1 // q26          |
| 201457_x_at  | <i>BUB3</i>              | -2.6656528 | -1.4144889 | 2.6656528 | down | chr10:124913929-124923532 (+) // 96.51 // q26.13     |
| 217645_at    | <i>COX16///SYNJ2BP-C</i> | -2.6601534 | -1.4115094 | 2.6601534 | down | chr14:70791798-70792211 (-) // 52.36 // q24.2        |

|              |                    |            |            |           |      |                                                        |
|--------------|--------------------|------------|------------|-----------|------|--------------------------------------------------------|
| 234192_s_at  | GKAP1              | -2.6568048 | -1.4096923 | 2.6568048 | down | chr9:86354337-86356497 (-) // 71.83 // q21.32          |
| 222879_s_at  | POLH               | -2.65594   | -1.4092226 | 2.65594   | down | chr6:43544016-43582419 (+) // 100.0 // p21.1           |
| 212807_s_at  | SORT1              | -2.6546562 | -1.408525  | 2.6546562 | down | chr1:109855074-109940551 (-) // 99.47 // p13.3         |
| 210502_s_at  | PP1E               | -2.6542656 | -1.4083128 | 2.6542656 | down | chr1:40204556-40229562 (+) // 96.0 // p34.2            |
| 224609_at    | SLC44A2            | -2.6522238 | -1.4072025 | 2.6522238 | down | chr19:10713139-10755231 (+) // 97.29 // p13.2          |
| 218046_s_at  | MRPS16             | -2.6520824 | -1.4071256 | 2.6520824 | down | chr10:75010499-75012409 (-) // 97.71 // q22.2          |
| 214032_at    | ZAP70              | -2.6516943 | -1.4069145 | 2.6516943 | down | chr2:98330028-98356323 (+) // 98.53 // q11.2           |
| 213674_x_at  | IGHD               | -2.6504374 | -1.4062304 | 2.6504374 | down | chr14:106304651-106610840 (-) // 92.03 // q32.33       |
| 209507_at    | RPA3               | -2.6502185 | -1.4061112 | 2.6502185 | down | chr7:7676556-7680094 (-) // 93.99 // p21.3             |
| 1569048_s_at | LMF1               | -2.6479785 | -1.4048915 | 2.6479785 | down | chr16:903875-906058 (-) // 97.15 // p13.3              |
| 1552660_a_at | C5orf22            | -2.6467595 | -1.4042271 | 2.6467595 | down | chr5:31532401-31554286 (+) // 86.99 // p13.3           |
| 221590_s_at  | ALDH6A1            | -2.6462376 | -1.4039426 | 2.6462376 | down | chr14:74525749-74527377 (-) // 52.38 // q24.3          |
| 221256_s_at  | HDHD3              | -2.646067  | -1.4038496 | 2.646067  | down | chr9:116135703-116136810 (-) // 96.85 // q32           |
| 204021_s_at  | PURA               | -2.6445358 | -1.4030145 | 2.6445358 | down | chr5:139493707-139494846 (+) // 79.98 // q31.2         |
| 224719_s_at  | C12orf57           | -2.6425052 | -1.4019063 | 2.6425052 | down | chr12:7052498-7055165 (+) // 85.2 // p13.31            |
| 213351_s_at  | TMCC1              | -2.642153  | -1.401714  | 2.642153  | down | chr3:129367543-129389684 (-) // 99.12 // q22.1         |
|              |                    |            |            |           |      | chr12:9465622-9466684 (+) // 97.34 //                  |
|              |                    |            |            |           |      | p13.31///chr12:31256662-31257725 (+) // 95.05 //       |
| 213378_s_at  | DDX11///DDX12P///L | -2.6410205 | -1.4010955 | 2.6410205 | down | p11.21///chr12:9570308-9571373 (-) // 96.7 // p13.31   |
| 226831_at    | SLC25A46           | -2.6393127 | -1.4001623 | 2.6393127 | down | chr5:110100034-110100857 (+) // 97.17 // q22.1         |
| 217202_s_at  | GLUL               | -2.6381965 | -1.399552  | 2.6381965 | down | chr9:34917171-34918072 (+) // 99.78 // p13.3           |
| 222525_s_at  | CCDC25             | -2.6362386 | -1.3984809 | 2.6362386 | down | chr8:27590834-27630170 (-) // 98.65 // p21.1           |
| 223570_at    | MCM10              | -2.6355336 | -1.3980951 | 2.6355336 | down | chr10:13206126-13253102 (+) // 90.97 // p13            |
| 227552_at    | 1.Sep              | -2.6327956 | -1.3965955 | 2.6327956 | down | chr16:30389458-30391610 (-) // 82.18 // p11.2          |
|              |                    |            |            |           |      | chr7:23520356-23520827 (+) // 97.03 //                 |
|              |                    |            |            |           |      | p15.3///chr5:111066368-111071201 (-) // 95.34 // q22.1 |
| 201309_x_at  | NREP               | -2.6323898 | -1.3963732 | 2.6323898 | down | chr16:69221049-69334884 (+) // 95.0 // q22.1           |
| 205315_s_at  | SNTB2              | -2.6323218 | -1.3963358 | 2.6323218 | down | chr8:81550769-81551623 (-) // 98.5 // q21.13           |
| 241963_at    | ZNF704             | -2.632095  | -1.3962116 | 2.632095  | down | chr5:49693509-49694451 (-) // 96.16 // q11.1           |
| 239072_at    | EMB                | -2.6307223 | -1.3954589 | 2.6307223 | down | chr11:61920663-61921191 (+) // 40.37 // q12.3          |
| 242787_at    |                    | -2.6292002 | -1.394624  | 2.6292002 | down | chr12:48513125-48539887 (+) // 99.25 // q13.11         |
| 210976_s_at  | PFKM               | -2.6289027 | -1.3944607 | 2.6289027 | down | chr1:174969257-174979415 (+) // 93.7 // q25.1          |
| 210691_s_at  | CACYBP             | -2.6288266 | -1.394419  | 2.6288266 | down | chr12:98909420-98929407 (+) // 92.15 // q23.1          |
| 203432_at    | TMPO               | -2.628451  | -1.394213  | 2.628451  | down | chr18:74725698-74726206 (+) // 100.0 // q23            |
| 228938_at    | MBP                | -2.6283422 | -1.3941531 | 2.6283422 | down | chr11:128563988-128682310 (+) // 96.72 // q24.3        |
| 204236_at    | FLI1               | -2.6271298 | -1.3934875 | 2.6271298 | down | chr18:52889984-52894502 (-) // 97.05 // q21.2          |
| 212385_at    | TCF4               | -2.6266415 | -1.3932194 | 2.6266415 | down |                                                        |

|             |          |                  |            |           |      |                                                  |
|-------------|----------|------------------|------------|-----------|------|--------------------------------------------------|
| 224595_at   | SLC44A1  | -2.6255763       | -1.3926342 | 2.6255763 | down | chr9:108007029-108153684 (+) // 96.06 // q31.1   |
| 236632_at   | HHIP-AS1 | -2.62415         | -1.3918502 | 2.62415   | down | chr4:145564072-145564751 (-) // 72.65 // q31.21  |
| 209695_at   | PTP4A3   | -2.6237667       | -1.3916395 | 2.6237667 | down | chr8:142432006-142441620 (+) // 94.58 // q24.3   |
| 238462_at   | UBASH3B  | -2.622166        | -1.390759  | 2.622166  | down | chr11:122683771-122685185 (+) // 96.93 // q24.1  |
| 229492_at   | VANGL1   | -2.6220965       | -1.3907208 | 2.6220965 | down | chr1:116237616-116238090 (+) // 84.79 // p13.1   |
| 201555_at   | MCM3     | -2.6216247       | -1.3904612 | 2.6216247 | down | chr6:52128817-52149507 (-) // 95.75 // p12.2     |
| 235109_at   | ZBED3    | -2.6208103       | -1.3900129 | 2.6208103 | down | chr5:76369288-76370343 (-) // 93.89 // q13.3     |
| 223943_s_at | GNG2     | -2.6170847       | -1.3879607 | 2.6170847 | down | chr14:52434420-52436513 (-) // 98.91 // q22.1    |
| 222077_s_at | RACGAP1  | -2.6114194       | -1.3848342 | 2.6114194 | down | chr12:50382946-50383586 (-) // 94.13 // q13.12   |
| 218355_at   | KIF4A    | -2.6097057       | -1.383887  | 2.6097057 | down | chrX:69509961-69640675 (+) // 97.88 // q13.1     |
| 216237_s_at | MCM5     | -2.6090925       | -1.3835481 | 2.6090925 | down | chr22:35819474-35820494 (+) // 97.45 // q12.3    |
| 236957_at   | CDCA2    | -2.6081998       | -1.3830544 | 2.6081998 | down | chr8:25340923-25346207 (+) // 96.49 // p21.2     |
| 227276_at   | PLXDC2   | -2.607302        | -1.3825576 | 2.607302  | down | chr10:20465989-20569286 (+) // 95.93 // p12.31   |
| 207057_at   | SLC16A7  | -2.6062305       | -1.3819647 | 2.6062305 | down | chr12:60083154-60173983 (+) // 99.14 // q14.1    |
| 223847_s_at | ERGIC1   | -2.605048        | -1.38131   | 2.605048  | down | chr5:172323827-172379686 (+) // 97.02 // q35.1   |
| 204100_at   | THRA     | -2.6046228       | -1.3810744 | 2.6046228 | down | chr17:38219306-38249942 (+) // 92.33 // q21.1    |
| 204886_at   | PLK4     | -2.6043766       | -1.380938  | 2.6043766 | down | chr4:128802149-128820375 (+) // 96.87 // q28.2   |
| 214773_x_at | TIPRL    | -2.6043053       | -1.3808986 | 2.6043053 | down | chr1:168148170-168171349 (+) // 97.34 // q24.2   |
| 214786_at   | MAP3K1   | -2.6030166       | -1.3801845 | 2.6030166 | down | chr5:56111458-56190254 (+) // 99.06 // q11.2     |
| 200703_at   | DYNLL1   | -2.601177        | -1.3791646 | 2.601177  | down | chr12:120933932-120936290 (+) // 99.22 // q24.31 |
| 208999_at   |          | 8.Sep -2.6001039 | -1.3785692 | 2.6001039 | down | chr5:132091695-132113067 (-) // 90.14 // q31.1   |
| 209464_at   | AURKB    | -2.5991676       | -1.3780496 | 2.5991676 | down | chr17:8108119-8113874 (-) // 96.49 // p13.1      |
| 201412_at   | LRP10    | -2.5985622       | -1.3777137 | 2.5985622 | down | chr14:23345045-23347289 (+) // 98.58 // q11.2    |
| 64408_s_at  | CALML4   | -2.594045        | -1.3752035 | 2.594045  | down | chr15:68486139-68492016 (-) // 79.62 // q23      |
| 213126_at   | MED8     | -2.5936997       | -1.3750114 | 2.5936997 | down | chr1:43849587-43854358 (-) // 88.65 // p34.2     |
| 238809_at   | C5orf51  | -2.593303        | -1.3747908 | 2.593303  | down | chr5:41904472-41911435 (-) // 87.75 // p13.1     |
| 236660_at   |          | -2.5928695       | -1.3745496 | 2.5928695 | down | chr6:90067526-90067979 (-) // 56.74 // q15       |
| 213562_s_at | SQLE     | -2.592048        | -1.3740925 | 2.592048  | down | chr8:126010754-126021476 (+) // 98.92 // q24.13  |
| 238012_at   | DPP7     | -2.591669        | -1.3738816 | 2.591669  | down | chr9:140023139-140024306 (-) // 76.06 // q34.3   |
| 202053_s_at | ALDH3A2  | -2.591577        | -1.3738303 | 2.591577  | down | chr17:19552126-19579055 (+) // 99.5 // p11.2     |
| 228296_at   | YPEL1    | -2.590439        | -1.3731967 | 2.590439  | down | chr22:22052514-22054486 (-) // 94.72 // q11.21   |
| 237241_at   | ECT2     | -2.589378        | -1.3726057 | 2.589378  | down | chr3:172472297-172474955 (-) // 96.3 // q26.31   |
| 207661_s_at | SH3PXD2A | -2.5889356       | -1.372359  | 2.5889356 | down | chr10:105359276-105453381 (-) // 96.2 // q24.33  |
| 201214_s_at | PPP1R7   | -2.5887442       | -1.3722523 | 2.5887442 | down | chr2:242089901-242122439 (+) // 99.46 // q37.3   |
| 224152_s_at | PBRM1    | -2.588481        | -1.3721057 | 2.588481  | down | chr3:52582005-52713730 (-) // 99.56 // p21.1     |
| 224448_s_at | MNF1     | -2.5883927       | -1.3720565 | 2.5883927 | down | chr6:33665345-33679504 (-) // 94.4 // p21.31     |



|              |           |            |            |           |      |                                                         |
|--------------|-----------|------------|------------|-----------|------|---------------------------------------------------------|
| 203800_s_at  | MRPS14    | -2.5869918 | -1.3712754 | 2.5869918 | down | chr1:174981719-174992554 (-) // 59.42 // q25.1          |
| 217856_at    | RBM8A     | -2.58691   | -1.3712299 | 2.58691   | down | chr1:145507623-145512986 (+) // 82.71 // q21.1          |
| 1552619_a_at | ANLN      | -2.5852757 | -1.3703182 | 2.5852757 | down | chr7:36429429-36492725 (+) // 99.2 // p14.2             |
| 209582_s_at  | CD200     | -2.5805547 | -1.3676813 | 2.5805547 | down | chr3:112052003-112081741 (+) // 92.4 // q13.2           |
| 205345_at    | BARD1     | -2.5798953 | -1.3673124 | 2.5798953 | down | chr2:215593276-215674366 (-) // 99.88 // q35            |
| 215904_at    | MLLT4     | -2.579272  | -1.366964  | 2.579272  | down | chr6:168291541-168370578 (+) // 96.43 // q27            |
| 202534_x_at  | DHFR      | -2.57885   | -1.3667278 | 2.57885   | down | chr5:79922047-79950816 (-) // 45.97 // q14.1            |
| 1558941_at   | ZNF704    | -2.5782576 | -1.3663964 | 2.5782576 | down | chr8:81552302-81553060 (-) // 98.18 // q21.13           |
| 203809_s_at  | AKT2      | -2.5764942 | -1.3654094 | 2.5764942 | down | chr19:40739468-40791262 (-) // 93.77 // q13.2           |
| 201251_at    | PKM       | -2.5756373 | -1.3649294 | 2.5756373 | down | chr15:72491412-72523551 (-) // 99.69 // q23             |
| 206572_x_at  | ZNF85     | -2.5751486 | -1.3646556 | 2.5751486 | down | chr19:21106093-21133501 (+) // 98.58 // p12             |
| 210524_x_at  |           | -2.5750487 | -1.3645997 | 2.5750487 | down | chr17:61895118-61895671 (-) // 51.26 // q23.3           |
| 231914_at    | NUDT14    | -2.5736856 | -1.3638358 | 2.5736856 | down | chr14:105639275-105649322 (-) // 93.48 // q32.33        |
| 203210_s_at  | RFC5      | -2.5715072 | -1.3626142 | 2.5715072 | down | chr12:118454623-118469298 (+) // 99.68 // q24.23        |
|              |           |            |            |           |      | chr22:21475771-21477299 (+) // 98.01 //                 |
|              |           |            |            |           |      | q11.21///chr22:23659420-23660948 (+) // 98.1 //         |
|              |           |            |            |           |      | q11.23///chr22:22980348-22981879 (+) // 97.06 //        |
|              |           |            |            |           |      | q11.22///chr22:25048523-25050054 (+) // 97.15 //        |
|              |           |            |            |           |      | q11.23///chr20:23974480-23976008 (-) // 96.97 //        |
|              |           |            |            |           |      | p11.21///chr22:18839072-18840600 (-) // 98.27 //        |
|              |           |            |            |           |      | q11.21///chr22:21641793-21643321 (-) // 98.27 //        |
|              |           |            |            |           |      | q11.21///chr22:24652640-24654172 (-) // 97.58 //        |
|              |           |            |            |           |      | q11.23///chr22:21049001-21050530 (-) // 97.06 // q11.21 |
| 226602_s_at  | BCR       | -2.5712557 | -1.3624731 | 2.5712557 | down | chr5:133308461-133328703 (-) // 95.67 //                |
|              |           |            |            |           |      | q31.1///chrX:91237650-91238504 (-) // 89.81 //          |
| 217140_s_at  | VDAC1     | -2.5705843 | -1.3620963 | 2.5705843 | down | q21.31///chrY:5075255-5076110 (-) // 88.76 // p11.2     |
| 209468_at    | LRP5      | -2.5705087 | -1.3620539 | 2.5705087 | down | chr11:68115313-68216646 (+) // 95.34 // q13.2           |
| 225907_at    | LOC728743 | -2.5664473 | -1.3597726 | 2.5664473 | down | chr7:150097789-150109557 (+) // 75.52 // q36.1          |
| 204819_at    | FGD1      | -2.5650923 | -1.3590107 | 2.5650923 | down | chrX:54471893-54522599 (-) // 92.26 // p11.22           |
| 201005_at    | CD9       | -2.561532  | -1.3570069 | 2.561532  | down | chr12:6309614-6347425 (+) // 93.88 // p13.31            |
| 226175_at    | TTC9C     | -2.5595334 | -1.3558809 | 2.5595334 | down | chr11:62495976-62506107 (+) // 96.11 // q12.3           |
| 210214_s_at  | BMPR2     | -2.5592225 | -1.3557055 | 2.5592225 | down | chr2:203242156-203424733 (+) // 94.13 // q33.1          |
| 221598_s_at  | MED27     | -2.557628  | -1.3548064 | 2.557628  | down | chr9:134735498-134955253 (-) // 97.78 // q34.13         |
| 211804_s_at  | CDK2      | -2.5568826 | -1.354386  | 2.5568826 | down | chr12:56360790-56365412 (+) // 97.88 // q13.2           |
| 203418_at    | CCNA2     | -2.5564787 | -1.354158  | 2.5564787 | down | chr4:122738553-122744880 (-) // 99.03 // q27            |
| 209048_s_at  | ZMYND8    | -2.554946  | -1.3532927 | 2.554946  | down | chr20:45837858-45984401 (-) // 97.6 // q13.12           |

|              |                         |            |            |           |      |                                                         |
|--------------|-------------------------|------------|------------|-----------|------|---------------------------------------------------------|
| 203209_at    | <i>RFC5</i>             | -2.5547159 | -1.3531629 | 2.5547159 | down | chr12:118454531-118470038 (+) // 99.14 // q24.23        |
| 213352_at    | <i>TMCC1</i>            | -2.5541248 | -1.352829  | 2.5541248 | down | chr3:129367543-129389684 (-) // 99.12 // q22.1          |
| 232028_at    | <i>ZNF678</i>           | -2.553168  | -1.3522885 | 2.553168  | down | chr1:227751235-227847581 (+) // 79.12 // q42.13         |
| 219155_at    | <i>PITPNC1</i>          | -2.5524988 | -1.3519102 | 2.5524988 | down | chr17:65374270-65689129 (+) // 99.38 // q24.2           |
| 219675_s_at  | <i>UXS1</i>             | -2.5493255 | -1.3501155 | 2.5493255 | down | chr2:106710071-106755337 (-) // 86.3 // q12.2           |
| 230285_at    | <i>SVIP</i>             | -2.5486662 | -1.3497424 | 2.5486662 | down | chr11:22842339-22843333 (-) // 90.76 // p14.3           |
| 225408_at    | <i>MBP</i>              | -2.548631  | -1.3497225 | 2.548631  | down | chr18:74724748-74728144 (-) // 96.83 // q23             |
| 230509_at    | <i>SNX22</i>            | -2.5485039 | -1.3496505 | 2.5485039 | down | chr15:64447478-64448035 (+) // 45.04 // q22.31          |
| 200999_s_at  | <i>CKAP4</i>            | -2.5481372 | -1.349443  | 2.5481372 | down | chr12:106631791-106641713 (-) // 92.1 // q23.3          |
| 239960_x_at  | <i>LYRM7</i>            | -2.5480607 | -1.3493996 | 2.5480607 | down |                                                         |
| 202770_s_at  | <i>CCNG2</i>            | -2.548023  | -1.3493783 | 2.548023  | down | chr4:78078526-78087946 (+) // 99.61 // q21.1            |
| 228671_at    | <i>TMEM201</i>          | -2.5479255 | -1.349323  | 2.5479255 | down | chr1:9671843-9674933 (+) // 94.07 // p36.22             |
| 243841_at    | <i>SYNE2</i>            | -2.5467918 | -1.348681  | 2.5467918 | down | chr14:64586252-64589232 (+) // 98.93 // q23.2           |
| 231577_s_at  | <i>GBP1</i>             | -2.5459156 | -1.3481846 | 2.5459156 | down | chr1:89518486-89519395 (-) // 90.99 // p22.2            |
| 1552947_x_at | <i>ZNF114</i>           | -2.544108  | -1.3471599 | 2.544108  | down | chr19:48774653-48790863 (+) // 86.58 // q13.33          |
| 214835_s_at  | <i>SUCLG2</i>           | -2.5438814 | -1.3470314 | 2.5438814 | down | chr3:67425144-67705001 (-) // 97.48 // p14.1            |
| 204985_s_at  | <i>TRAPPC6A</i>         | -2.5418024 | -1.3458519 | 2.5418024 | down | chr19:45666186-45681485 (-) // 96.59 // q13.32          |
| 236301_at    | <i>IKZF3</i>            | -2.5410519 | -1.3454258 | 2.5410519 | down | chr17:37919134-37920138 (-) // 79.56 // q12             |
| 204483_at    | <i>ENO3</i>             | -2.5410123 | -1.3454033 | 2.5410123 | down | chr17:4855121-4860423 (+) // 99.28 // p13.2             |
| 242527_at    |                         | -2.5375745 | -1.3434502 | 2.5375745 | down | chr18:13477668-13478698 (+) // 49.08 // p11.21          |
| 231808_at    | <i>OIP5-AS1</i>         | -2.537268  | -1.3432759 | 2.537268  | down | chr15:41576184-41592033 (+) // 75.34 // q15.1           |
| 223481_s_at  | <i>MRPL47</i>           | -2.5352826 | -1.3421465 | 2.5352826 | down | chr3:179280744-179320591 (-) // 95.04 // q26.33         |
| 227246_at    | <i>PLRG1</i>            | -2.5349483 | -1.3419564 | 2.5349483 | down | chr4:155456157-155456710 (-) // 49.57 // q31.3          |
|              |                         |            |            |           |      | chrX:133300698-133301109 (+) // 93.62 //                |
| 218357_s_at  | <i>TIMM8B</i>           | -2.5344326 | -1.3416628 | 2.5344326 | down | q26.2///chr11:111955871-111957459 (-) // 97.16 // q23.1 |
| 216033_s_at  | <i>FYN</i>              | -2.532344  | -1.3404734 | 2.532344  | down | chr6:111982941-112194625 (-) // 95.78 // q21            |
| 214051_at    | <i>LOC101060235//TM</i> | -2.5322008 | -1.3403919 | 2.5322008 | down | chrX:103217214-103220549 (+) // 95.79 // q22.2          |
| 228614_at    | <i>LINC00116</i>        | -2.5315356 | -1.3400128 | 2.5315356 | down | chr2:110969105-110970387 (-) // 90.71 // q13            |
| 226936_at    | <i>CENPW</i>            | -2.528212  | -1.3381175 | 2.528212  | down | chr6:126661250-126669754 (+) // 77.42 // q22.32         |
| 1554429_a_at | <i>DMWD</i>             | -2.5271246 | -1.3374968 | 2.5271246 | down | chr19:46287038-46289883 (-) // 99.87 // q13.32          |
| 204318_s_at  | <i>GTSE1</i>            | -2.5252244 | -1.3364116 | 2.5252244 | down | chr22:46693284-46726423 (+) // 87.84 // q13.31          |
| 202761_s_at  | <i>SYNE2</i>            | -2.523501  | -1.3354266 | 2.523501  | down | chr14:64641683-64693150 (+) // 98.43 // q23.2           |
| 227413_at    | <i>UBLCP1</i>           | -2.5229528 | -1.3351132 | 2.5229528 | down | chr5:158712314-158713046 (+) // 98.26 // q33.3          |
| 204129_at    | <i>BCL9//LOC1010607</i> | -2.5227957 | -1.3350234 | 2.5227957 | down | chr1:147013181-147098012 (+) // 99.22 // q21.2          |
| 225638_at    | <i>COA6</i>             | -2.5207567 | -1.3338569 | 2.5207567 | down | chr1:234508555-234519791 (+) // 74.59 // q42.2          |
| 204386_s_at  | <i>MRP63</i>            | -2.5195315 | -1.3331555 | 2.5195315 | down | chr13:21750849-21752144 (+) // 74.83 // q12.11          |

|              |                    |            |            |           |      |                                                  |
|--------------|--------------------|------------|------------|-----------|------|--------------------------------------------------|
| 200758_s_at  | <i>NFE2L1</i>      | -2.5190778 | -1.3328956 | 2.5190778 | down | chr17:46125696-46138907 (+) // 96.61 // q21.32   |
| 219632_s_at  | <i>SHPK1/TRPV1</i> | -2.5175352 | -1.3320119 | 2.5175352 | down | chr17:3468740-3500392 (-) // 83.58 // p13.2      |
| 231034_s_at  |                    | -2.5174623 | -1.3319701 | 2.5174623 | down | chr6:138744380-138744952 (+) // 97.11 // q23.3   |
| 203073_at    | <i>COG2</i>        | -2.515109  | -1.330621  | 2.515109  | down | chr1:230778257-230829727 (+) // 99.83 // q42.2   |
| 208002_s_at  | <i>ACOT7</i>       | -2.5137897 | -1.3298639 | 2.5137897 | down | chr1:6324331-6453438 (-) // 94.44 // p36.31      |
| 212832_s_at  | <i>CKAP5</i>       | -2.5129733 | -1.3293953 | 2.5129733 | down | chr11:46764954-46842808 (-) // 99.38 // p11.2    |
| 229886_at    | <i>C5orf34</i>     | -2.512502  | -1.3291247 | 2.512502  | down | chr5:43486807-43490810 (-) // 84.75 // p12       |
| 225106_s_at  | <i>OGFOD1</i>      | -2.5110881 | -1.3283126 | 2.5110881 | down | chr16:56485433-56513034 (+) // 78.12 // q12.2    |
| 212022_s_at  | <i>MKI67</i>       | -2.5110204 | -1.3282738 | 2.5110204 | down | chr10:129894926-129924649 (-) // 98.21 // q26.2  |
| 216519_s_at  | <i>PROSC</i>       | -2.510059  | -1.3277214 | 2.510059  | down | chr8:37620112-37636318 (-) // 91.49 // p11.23    |
| 208270_s_at  | <i>RNPEP</i>       | -2.508827  | -1.327013  | 2.508827  | down | chr1:201951790-201975262 (+) // 96.92 // q32.1   |
| 205169_at    | <i>RBBP5</i>       | -2.5086052 | -1.3268855 | 2.5086052 | down | chr1:205056341-205091104 (-) // 90.31 // q32.1   |
| 225455_at    | <i>TADA1</i>       | -2.5075765 | -1.3262937 | 2.5075765 | down | chr1:166825750-166845678 (-) // 97.88 // q24.1   |
| 209974_s_at  | <i>BUB3</i>        | -2.5073683 | -1.3261739 | 2.5073683 | down | chr10:124913930-124924879 (+) // 97.56 // q26.13 |
| 207565_s_at  | <i>MR1</i>         | -2.5027058 | -1.3234887 | 2.5027058 | down | chr1:181003138-181024633 (+) // 100.0 // q25.3   |
| 218968_s_at  | <i>ZFP64</i>       | -2.5026765 | -1.3234718 | 2.5026765 | down | chr20:50767819-50808312 (-) // 90.26 // q13.2    |
| 201458_s_at  | <i>BUB3</i>        | -2.5019717 | -1.3230655 | 2.5019717 | down | chr10:124913930-124924879 (+) // 97.79 // q26.13 |
| 224392_s_at  | <i>OPN3</i>        | -2.5008767 | -1.322434  | 2.5008767 | down | chr1:241756507-241803648 (-) // 81.72 // q43     |
| 238015_at    | <i>C4orf46</i>     | -2.5005007 | -1.322217  | 2.5005007 | down | chr4:159587893-159589336 (-) // 31.24 // q32.1   |
| 209828_s_at  | <i>IL16</i>        | -2.4986725 | -1.3211619 | 2.4986725 | down | chr15:81587466-81602116 (+) // 84.57 // q25.1    |
| 223400_s_at  | <i>PBRM1</i>       | -2.4974647 | -1.3204643 | 2.4974647 | down | chr3:52580663-52713743 (-) // 96.25 // p21.1     |
| 224707_at    | <i>CYSTM1</i>      | -2.497192  | -1.3203067 | 2.497192  | down | chr5:139554729-139623372 (+) // 91.87 // q31.3   |
| 202095_s_at  | <i>BIRC5</i>       | -2.4971585 | -1.3202873 | 2.4971585 | down | chr17:76210348-76220777 (+) // 97.59 // q25.3    |
| 203259_s_at  | <i>HDDC2</i>       | -2.4960196 | -1.3196293 | 2.4960196 | down | chr6:125597031-125623217 (-) // 86.78 // q22.31  |
| 1555278_a_at | <i>CKAP5</i>       | -2.4957209 | -1.3194566 | 2.4957209 | down | chr11:46765566-46791743 (-) // 98.14 // p11.2    |
| 242338_at    | <i>TMEM64</i>      | -2.4950747 | -1.3190831 | 2.4950747 | down | chr8:91637325-91638021 (-) // 93.86 // q21.3     |
| 228333_at    | <i>ZEB2</i>        | -2.4945767 | -1.318795  | 2.4945767 | down | chr2:145141941-145143426 (-) // 85.7 // q22.3    |
| 225606_at    | <i>BCL2L11</i>     | -2.4932232 | -1.318012  | 2.4932232 | down | chr2:111922398-111926021 (+) // 98.6 // q13      |
| 226101_at    | <i>PRKCE</i>       | -2.4928715 | -1.3178085 | 2.4928715 | down | chr2:46413100-46415128 (+) // 97.36 // p21       |
| 1559526_at   |                    | -2.4915495 | -1.3170432 | 2.4915495 | down | chr10:674554-676233 (+) // 90.59 // p15.3        |
| 227316_at    | <i>PET117</i>      | -2.4914079 | -1.3169613 | 2.4914079 | down | chr20:18118581-18123486 (-) // 98.03 // p11.23   |
| 235176_at    | <i>ZFP82</i>       | -2.49119   | -1.316835  | 2.49119   | down | chr19:36882387-36884254 (-) // 54.87 // q13.12   |
| 201706_s_at  | <i>PEX19</i>       | -2.489307  | -1.3157442 | 2.489307  | down | chr1:160248270-160254916 (-) // 97.53 // q23.2   |
| 226240_at    | <i>TADA2B</i>      | -2.489173  | -1.3156664 | 2.489173  | down | chr4:7055828-7058364 (+) // 98.05 // p16.1       |
| 219003_s_at  | <i>MANEA</i>       | -2.488962  | -1.3155441 | 2.488962  | down | chr6:96034629-96055594 (+) // 95.1 // q16.1      |
| 228597_at    | <i>MIS18A</i>      | -2.4867873 | -1.3142831 | 2.4867873 | down | chr21:33640537-33641298 (-) // 54.97 // q22.11   |

|              |                           |            |            |           |      |                                                                                             |
|--------------|---------------------------|------------|------------|-----------|------|---------------------------------------------------------------------------------------------|
| 225752_at    | <i>NIPA1</i>              | -2.4865537 | -1.3141476 | 2.4865537 | down | chr15:23043278-23046097 (-) // 92.96 // q11.2                                               |
| 1555793_a_at | <i>ZFP82</i>              | -2.4846992 | -1.3130713 | 2.4846992 | down | chr19:36882929-36909499 (-) // 75.76 // q13.12                                              |
| 207667_s_at  | <i>LOC100996792///MA</i>  | -2.4839876 | -1.312658  | 2.4839876 | down | chr17:21194780-21218277 (+) // 97.0 // p11.2                                                |
| 243136_at    | <i>GINS2</i>              | -2.4836476 | -1.3124605 | 2.4836476 | down | chr16:85709803-85710185 (-) // 99.22 // q24.1                                               |
| 202691_at    | <i>SNRPD1</i>             | -2.4835498 | -1.3124037 | 2.4835498 | down | chr18:19192258-19210208 (+) // 70.97 // q11.2                                               |
| 205561_at    | <i>KCTD17</i>             | -2.483099  | -1.3121418 | 2.483099  | down | chr22:37447615-37459430 (+) // 84.41 // q12.3                                               |
| 223639_s_at  | <i>ZNRD1</i>              | -2.4816709 | -1.3113118 | 2.4816709 | down | chr6:30029292-30032582 (+) // 100.0 // p22.1                                                |
| 241752_at    | <i>SLC8A1</i>             | -2.4794414 | -1.3100151 | 2.4794414 | down | chr2:40340842-40341549 (-) // 97.98 // p22.1                                                |
| 1561236_at   |                           | -2.4792686 | -1.3099146 | 2.4792686 | down | chr2:106726630-106730093 (+) // 77.68 // q12.2                                              |
| 201202_at    | <i>PCNA</i>               | -2.478928  | -1.3097165 | 2.478928  | down | chr20:5095602-5100562 (-) // 99.59 // p13                                                   |
| 200622_x_at  | <i>CALM1///CALM2///C,</i> | -2.478504  | -1.3094696 | 2.478504  | down | chr19:47104548-47114039 (+) // 95.38 // q13.32                                              |
| 1553962_s_at | <i>RHOB</i>               | -2.4773178 | -1.308779  | 2.4773178 | down | chr2:20646834-20648541 (+) // 89.46 // p24.1                                                |
| 209518_at    | <i>SMARCD1</i>            | -2.4771786 | -1.3086979 | 2.4771786 | down | chr12:50479194-50494489 (+) // 99.19 // q13.12                                              |
| 202190_at    | <i>CSTF1</i>              | -2.47676   | -1.308454  | 2.47676   | down | chr20:54967618-54979107 (+) // 100.0 // q13.2                                               |
| 223361_at    | <i>ABRACL</i>             | -2.47535   | -1.3076324 | 2.47535   | down | chr6:139349896-139364439 (+) // 87.56 // q24.1                                              |
| 1552277_a_at | <i>MSANTD3</i>            | -2.474772  | -1.3072956 | 2.474772  | down | chr9:103204185-103213511 (+) // 87.97 // q31.1                                              |
| 228245_s_at  | <i>LOC100509445///LO</i>  | -2.474109  | -1.3069091 | 2.474109  | down | chr12:31264592-31269405 (-) // 65.39 // p11.21                                              |
| 1553192_at   | <i>ZNF441</i>             | -2.4731112 | -1.3063271 | 2.4731112 | down | chr19:11877906-11893890 (+) // 64.38 // p13.2                                               |
| 235575_at    |                           | -2.4728491 | -1.3061742 | 2.4728491 | down | chr3:195418384-195419180 (+) // 71.84 // q29                                                |
| 210988_s_at  | <i>PRUNE</i>              | -2.472787  | -1.3061379 | 2.472787  | down | chr1:150980953-151007683 (+) // 93.9 // q21.3                                               |
| 242753_x_at  | <i>AP1AR</i>              | -2.4691236 | -1.3039991 | 2.4691236 | down | chr4:113186887-113187987 (+) // 94.96 // q25                                                |
| 224817_at    | <i>SH3PXD2A</i>           | -2.4679534 | -1.3033152 | 2.4679534 | down | chr10:105353788-105356202 (-) // 97.53 // q24.33                                            |
| 1557684_at   | <i>ZNF286A</i>            | -2.467761  | -1.3032027 | 2.467761  | down | chr17:15604501-15622452 (+) // 72.83 // p12///chr17:18563401-18584106 (-) // 72.39 // p11.2 |
| 234524_at    | <i>PRDM15</i>             | -2.4673526 | -1.302964  | 2.4673526 | down | chr21:43255465-43299480 (-) // 95.99 // q22.3                                               |
| 224759_s_at  | <i>C12orf23</i>           | -2.4669383 | -1.3027216 | 2.4669383 | down | chr12:107349673-107367813 (+) // 98.44 // q23.3                                             |
| 1553644_at   | <i>SYNE3</i>              | -2.4667466 | -1.3026094 | 2.4667466 | down | chr14:95883830-95918635 (-) // 97.35 // q32.13                                              |
| 212144_at    | <i>SUN2</i>               | -2.4660463 | -1.3021998 | 2.4660463 | down | chr22:39130736-39150685 (-) // 98.61 // q13.1                                               |
| 202369_s_at  | <i>TRAM2</i>              | -2.4646153 | -1.3013625 | 2.4646153 | down | chr6:52362206-52441788 (-) // 93.2 // p12.2                                                 |
| 202494_at    | <i>PPIE</i>               | -2.464003  | -1.301004  | 2.464003  | down | chr1:40204561-40219375 (+) // 98.44 // p34.2                                                |
| 214251_s_at  | <i>NUMA1</i>              | -2.4630806 | -1.3004639 | 2.4630806 | down | chr11:71713910-71726721 (-) // 96.01 // q13.4                                               |
| 204887_s_at  | <i>PLK4</i>               | -2.4630463 | -1.3004438 | 2.4630463 | down | chr4:128802149-128819735 (+) // 98.67 // q28.2                                              |
| 213638_at    | <i>PHACTR1</i>            | -2.4628975 | -1.3003566 | 2.4628975 | down | chr6:13272903-13288074 (+) // 98.71 // p24.1                                                |
| 1552828_at   | <i>SNX18</i>              | -2.4628553 | -1.300332  | 2.4628553 | down | chr5:53813782-53815669 (+) // 96.88 // q11.2                                                |
| 224577_at    | <i>ERGIC1</i>             | -2.4620323 | -1.2998497 | 2.4620323 | down | chr5:172261222-172379686 (+) // 95.65 // q35.1                                              |
| 201163_s_at  | <i>IGFBP7</i>             | -2.4612262 | -1.2993773 | 2.4612262 | down | chr4:57897245-57976539 (-) // 98.58 // q12                                                  |

|             |              |            |            |           |      |                                                 |
|-------------|--------------|------------|------------|-----------|------|-------------------------------------------------|
| 204804_at   | TRIM21       | -2.4603443 | -1.2988602 | 2.4603443 | down | chr11:4406137-4411690 (-) // 97.04 // p15.4     |
| 224581_s_at | NUCKS1       | -2.4589725 | -1.2980555 | 2.4589725 | down | chr1:205682320-205686339 (-) // 95.13 // q32.1  |
| 218190_s_at | UQCR10       | -2.4566453 | -1.2966895 | 2.4566453 | down | chr22:30163375-30165932 (+) // 93.65 // q12.2   |
| 223532_at   | ANKRD39      | -2.4564877 | -1.296597  | 2.4564877 | down | chr2:97513776-97523726 (-) // 89.91 // q11.2    |
| 213287_s_at | KRT10        | -2.4556293 | -1.2960929 | 2.4556293 | down | chr17:38974368-38978862 (-) // 77.2 // q21.2    |
| 202903_at   | LSM5         | -2.4554558 | -1.2959908 | 2.4554558 | down | chr7:32525086-32530009 (-) // 71.76 // p14.3    |
| 228559_at   | CENPN        | -2.4550076 | -1.2957275 | 2.4550076 | down | chr16:81064537-81065079 (+) // 57.76 // q23.2   |
| 200790_at   | ODC1         | -2.4549704 | -1.2957056 | 2.4549704 | down | chr2:10580507-10588453 (-) // 97.67 // p25.1    |
| 234992_x_at | ECT2         | -2.4545147 | -1.2954378 | 2.4545147 | down | chr3:172468537-172525663 (+) // 91.41 // q26.31 |
| 207023_x_at | KRT10        | -2.4501717 | -1.2928828 | 2.4501717 | down | chr17:38974369-38978841 (-) // 81.35 // q21.2   |
| 200783_s_at | STMN1        | -2.4499238 | -1.2927369 | 2.4499238 | down | chr1:26226611-26231232 (-) // 98.12 // p36.11   |
| 213996_at   | YPEL1        | -2.4477181 | -1.2914374 | 2.4477181 | down | chr22:22054764-22090066 (-) // 71.17 // q11.21  |
| 32811_at    | MYO1C        | -2.446257  | -1.290576  | 2.446257  | down | chr17:1368402-1386353 (-) // 71.84 // p13.3     |
| 1555852_at  | LOC100507463 | -2.4439437 | -1.289211  | 2.4439437 | down | chr6:32812980-32815855 (+) // 73.07 // p21.32   |
| 222701_s_at | CHCHD7       | -2.4415152 | -1.2877768 | 2.4415152 | down | chr8:57124353-57131178 (+) // 80.36 // q12.1    |
| 214545_s_at | PROSC        | -2.441326  | -1.2876649 | 2.441326  | down | chr8:37620177-37635819 (+) // 95.25 // p11.23   |
| 201678_s_at | C3orf37      | -2.4410417 | -1.2874969 | 2.4410417 | down | chr3:128998550-129024133 (+) // 90.25 // q21.3  |
| 212922_s_at | SMYD2        | -2.440456  | -1.2871506 | 2.440456  | down | chr1:214504374-214512115 (+) // 78.96 // q41    |
| 236189_at   | ANKRD50      | -2.439974  | -1.2868658 | 2.439974  | down | chr4:125628812-125631475 (-) // 91.63 // q28.1  |
| 224129_s_at | DPY30        | -2.4380126 | -1.2857056 | 2.4380126 | down | chr2:32249030-32264823 (-) // 97.41 // p22.3    |
| 227960_s_at | FAHD1        | -2.437414  | -1.2853513 | 2.437414  | down | chr16:1878205-1878909 (+) // 61.11 // p13.3     |
| 229884_s_at | MRPL2        | -2.435505  | -1.2842209 | 2.435505  | down | chr6:43025677-43027118 (-) // 96.53 // p21.1    |
| 218170_at   | ISOC1        | -2.4352806 | -1.284088  | 2.4352806 | down | chr5:128430439-128449831 (+) // 96.89 // q23.3  |
| 220840_s_at | C1orf112     | -2.434969  | -1.2839034 | 2.434969  | down | chr1:169764219-169822226 (+) // 99.45 // q24.2  |
| 225332_at   | OIP5-AS1     | -2.4348495 | -1.2838326 | 2.4348495 | down | chr15:41592299-41594744 (+) // 76.19 // q15.1   |
| 203646_at   | FDX1         | -2.4345355 | -1.2836466 | 2.4345355 | down | chr11:110300711-110333972 (+) // 87.13 // q22.3 |
| 209040_s_at | PSMB8        | -2.4340186 | -1.2833402 | 2.4340186 | down | chr6:32808624-32811801 (-) // 98.97 // p21.32   |
| 213132_s_at | MCAT         | -2.431939  | -1.282107  | 2.431939  | down | chr22:43528211-43539388 (-) // 97.77 // q13.2   |
| 201022_s_at | DSTN         | -2.4312587 | -1.2817034 | 2.4312587 | down | chr20:17550784-17588644 (+) // 98.68 // p12.1   |
| 200604_s_at | PRKAR1A      | -2.4311557 | -1.2816423 | 2.4311557 | down | chr17:66508593-66526805 (+) // 99.05 // q24.2   |
| 203626_s_at | SKP2         | -2.4305394 | -1.2812765 | 2.4305394 | down | chr5:36152188-36182274 (+) // 97.69 // p13.2    |
| 233000_x_at | DPH3P1       | -2.4302888 | -1.2811277 | 2.4302888 | down | chr20:61476480-61477543 (+) // 73.4 // q13.33   |
| 201700_at   | CCND3        | -2.4301653 | -1.2810545 | 2.4301653 | down | chr6:41902679-41909552 (-) // 97.01 // p21.1    |
| 216952_s_at | LMNB2        | -2.4291599 | -1.2804574 | 2.4291599 | down | chr19:2428164-2431900 (-) // 98.65 // p13.3     |
| 225684_at   | SKA2         | -2.4287152 | -1.2801933 | 2.4287152 | down | chr17:57187315-57232642 (-) // 70.12 // q22     |
| 220643_s_at | FAIM         | -2.4280763 | -1.2798138 | 2.4280763 | down | chr3:138327918-138352211 (+) // 99.89 // q22.3  |

|              |                 |            |            |           |      |                                                       |
|--------------|-----------------|------------|------------|-----------|------|-------------------------------------------------------|
| 1567853_at   | ZNF28           | -2.4267652 | -1.2790345 | 2.4267652 | down | chr19:53304287-53304455 (+) // 100.0 // q13.41        |
| 224964_s_at  | GNG2            | -2.4266415 | -1.278961  | 2.4266415 | down | chr14:52327329-52436513 (+) // 98.31 // q22.1         |
| 201581_at    | TMX4            | -2.426047  | -1.2786075 | 2.426047  | down | chr20:7957999-8000443 (-) // 86.89 // p12.3           |
| 218459_at    | TOR3A           | -2.421976  | -1.2761846 | 2.421976  | down | chr1:179051232-179065124 (+) // 96.58 // q25.2        |
| 221079_s_at  | METTL2A//METTL2 | -2.420106  | -1.2750702 | 2.420106  | down | chr17:60501261-60526705 (+) // 90.44 //               |
| 200747_s_at  | NUMA1           | -2.4199018 | -1.2749485 | 2.4199018 | down | q23.2//chr7:128116817-128142585 (+) // 92.91 // q32.1 |
| 226767_s_at  | FAHD1           | -2.4176896 | -1.2736291 | 2.4176896 | down | chr11:71713918-71791561 (-) // 98.46 // q13.4         |
| 223210_at    | CHURC1          | -2.4150894 | -1.2720766 | 2.4150894 | down | chr16:1876971-1878275 (+) // 78.13 // p13.3           |
| 204175_at    | ZNF593          | -2.414373  | -1.2716485 | 2.414373  | down | chr14:65381161-65399354 (+) // 82.38 // q23.3         |
| 209765_at    | ADAM19          | -2.4141407 | -1.2715098 | 2.4141407 | down | chr1:26496478-26497361 (+) // 99.64 // p36.11         |
| 213530_at    | RAB3GAP1        | -2.4136994 | -1.2712461 | 2.4136994 | down | chr5:156904312-157002768 (-) // 85.61 // q33.3        |
| 212955_s_at  | POLR2I          | -2.413079  | -1.2708752 | 2.413079  | down | chr2:135926629-135927856 (+) // 76.62 // q21.3        |
| 217946_s_at  | SAE1            | -2.4121435 | -1.2703158 | 2.4121435 | down | chr19:36604615-36606173 (-) // 95.96 // q13.12        |
|              |                 |            |            |           |      | chr19:47634131-47713447 (+) // 97.77 // q13.32        |
|              |                 |            |            |           |      | chr3:195367994-195368455 (+) // 21.4 //               |
|              |                 |            |            |           |      | q29//chr5:278018-278476 (+) // 20.74 //               |
|              |                 |            |            |           |      | p15.33//chr3:197375241-197375691 (-) // 20.74 //      |
|              |                 |            |            |           |      | q29//chr3:195674934-195675395 (-) // 12.01 // q29     |
| 240908_at    |                 | -2.4119132 | -1.270178  | 2.4119132 | down | chr1:6281254-6296006 (-) // 89.66 // p36.31           |
| 201611_s_at  | ICMT            | -2.411047  | -1.2696598 | 2.411047  | down | chr10:47656085-47656922 (+) // 30.92 // q11.22        |
| 1556486_at   | OTTHUMG00000176 | -2.410565  | -1.2693713 | 2.410565  | down | chrX:134021661-134049297 (-) // 97.46 // q26.3        |
| 218853_s_at  | MOSPD1          | -2.409771  | -1.268896  | 2.409771  | down | chr1:168148290-168161106 (+) // 71.75 // q24.2        |
| 1554351_a_at | TIPRL           | -2.4095597 | -1.2687696 | 2.4095597 | down | chr15:66629175-66645295 (-) // 96.01 // q22.31        |
| 219258_at    | TIPIN           | -2.4095352 | -1.2687548 | 2.4095352 | down | chr1:206809072-206857758 (+) // 81.43 // q32.1        |
| 1560785_at   | DYRK3           | -2.4095302 | -1.2687519 | 2.4095302 | down | chr3:16299029-16306476 (-) // 84.75 // p25.1          |
| 225200_at    | DPH3            | -2.408881  | -1.2683631 | 2.408881  | down | chr14:54866610-54886826 (+) // 98.51 // q22.2         |
| 209714_s_at  | CDKN3           | -2.4077764 | -1.2677014 | 2.4077764 | down | chr17:76219899-76358409 (-) // 91.84 // q25.3         |
| 1555826_at   | BIRC5           | -2.406044  | -1.2666631 | 2.406044  | down | chrX:119387270-119389844 (+) // 98.41 // q24          |
| 214631_at    | ZBTB33          | -2.406032  | -1.2666559 | 2.406032  | down | chr1:114447978-114456706 (+) // 84.45 // p13.2        |
| 222889_at    | DCLRE1B         | -2.4049728 | -1.2660205 | 2.4049728 | down | chr17:61994562-61996198 (-) // 99.73 //               |
| 208068_x_at  | CSH1//CSHL1//GH | -2.404536  | -1.2657585 | 2.404536  | down | q23.3//chr17:61957574-61959223 (-) // 96.8 // q23.3   |
| 205024_s_at  | RAD51           | -2.4039583 | -1.2654119 | 2.4039583 | down | chr15:40987421-41023790 (+) // 98.84 // q15.1         |
| 202982_s_at  | ACOT1//ACOT2    | -2.4029784 | -1.2648237 | 2.4029784 | down | chr14:74035988-74042357 (+) // 98.6 // q24.3          |
| 204153_s_at  | MFNG            | -2.4018064 | -1.2641199 | 2.4018064 | down | chr22:37865102-37882385 (-) // 90.5 // q13.1          |
| 230165_at    | SGOL2           | -2.4017196 | -1.2640678 | 2.4017196 | down | chr2:201438497-201448531 (+) // 95.44 // q33.1        |
| 223413_s_at  | LYAR            | -2.4015927 | -1.2639915 | 2.4015927 | down | chr4:4269435-4291896 (-) // 91.05 // p16.3            |

|              |                 |            |            |           |      |                                                        |
|--------------|-----------------|------------|------------|-----------|------|--------------------------------------------------------|
| 200648_s_at  | <i>GLUL</i>     | -2.401284  | -1.263806  | 2.401284  | down | chr1:182353415-182360850 (-) // 94.66 // q25.3         |
| 227545_at    | <i>BARD1</i>    | -2.4010832 | -1.2636855 | 2.4010832 | down | chr2:215591354-215593005 (-) // 95.38 // q35           |
| 236604_at    | <i>BAHCC1</i>   | -2.3996806 | -1.2628424 | 2.3996806 | down | chr17:79428984-79430848 (-) // 96.76 // q25.3          |
| 221531_at    | <i>WDR61</i>    | -2.39929   | -1.2626076 | 2.39929   | down | chr15:78575750-78588068 (-) // 98.99 // q25.1          |
| 212133_at    | <i>NIPA2</i>    | -2.3989158 | -1.2623825 | 2.3989158 | down | chr15:23004236-23034370 (-) // 94.71 // q11.2          |
| 218618_s_at  | <i>FNDC3B</i>   | -2.3969717 | -1.261213  | 2.3969717 | down | chr3:172058900-172115466 (+) // 97.12 // q26.31        |
| 207838_x_at  | <i>PBXIP1</i>   | -2.396898  | -1.2611685 | 2.396898  | down | chr1:154917428-154928580 (-) // 99.15 // q21.3         |
| 211190_x_at  | <i>CD84</i>     | -2.3967757 | -1.2610949 | 2.3967757 | down | chr1:160518036-160549294 (-) // 99.69 // q23.3         |
| 39705_at     | <i>SIN3B</i>    | -2.3961673 | -1.2607286 | 2.3961673 | down | chr19:16940230-16991164 (+) // 76.31 // p13.11         |
|              |                 |            |            |           |      | chrX:103231672-103232927 (+) // 95.25 //               |
|              |                 |            |            |           |      | q22.2///chrX:103315076-103316329 (-) // 95.25 // q22.2 |
| 230664_at    | <i>H2BFXP</i>   | -2.3948753 | -1.2599505 | 2.3948753 | down | chr1:183595337-183605020 (-) // 93.21 // q25.3         |
| 211963_s_at  | <i>ARPC5</i>    | -2.3931508 | -1.2589114 | 2.3931508 | down | chr9:116817542-116818875 (+) // 94.6 // q32            |
| 226592_at    | <i>ZNF618</i>   | -2.3928547 | -1.2587328 | 2.3928547 | down | chr2:128603485-128604983 (-) // 65.51 // q14.3         |
| 214144_at    | <i>POLR2D</i>   | -2.392394  | -1.258455  | 2.392394  | down | chr2:232597634-232645953 (-) // 70.31 // q37.1         |
| 216883_x_at  | <i>PDE6D</i>    | -2.3883908 | -1.2560389 | 2.3883908 | down | chr16:71893587-71917412 (-) // 94.15 // q22.2          |
| 41397_at     | <i>ZNF821</i>   | -2.3864264 | -1.2548518 | 2.3864264 | down | chr14:52327329-52436513 (+) // 98.31 // q22.1          |
| 224965_at    | <i>GNG2</i>     | -2.3841336 | -1.253465  | 2.3841336 | down | chr3:52558402-52569070 (-) // 96.74 // p21.1           |
| 218051_s_at  | <i>NT5DC2</i>   | -2.3839965 | -1.2533821 | 2.3839965 | down | chr14:64408606-64430653 (+) // 95.4 // q23.2           |
| 242774_at    | <i>SYNE2</i>    | -2.3838387 | -1.2532866 | 2.3838387 | down | chr12:56598284-56615704 (-) // 98.58 // q13.2          |
| 201961_s_at  | <i>RNF41</i>    | -2.3832967 | -1.2529585 | 2.3832967 | down | chr7:1509912-1533488 (-) // 98.16 // p22.3             |
| 212210_at    | <i>INTS1</i>    | -2.382814  | -1.2526664 | 2.382814  | down | chr5:125936638-125961011 (+) // 93.2 // q23.2          |
| 234405_s_at  | <i>PHAX</i>     | -2.3827953 | -1.252655  | 2.3827953 | down | chr15:41594243-41598732 (+) // 95.39 // q15.1          |
| 225225_at    | <i>OIP5-AS1</i> | -2.3814383 | -1.2518331 | 2.3814383 | down | chr6:99317551-99317968 (-) // 98.11 // q16.1           |
| 236994_at    |                 | -2.380271  | -1.2511258 | 2.380271  | down | chr6:111982486-112194627 (-) // 94.48 // q21           |
| 210105_s_at  | <i>FYN</i>      | -2.3797898 | -1.2508341 | 2.3797898 | down | chr12:12764830-12798041 (+) // 96.26 // p13.2          |
| 201990_s_at  | <i>CREBL2</i>   | -2.378002  | -1.2497499 | 2.378002  | down | chr10:99400442-99435808 (+) // 98.08 // q24.2          |
| 209345_s_at  | <i>PI4K2A</i>   | -2.3778446 | -1.2496544 | 2.3778446 | down | chr15:41060110-41064645 (+) // 90.9 // q15.1           |
| 1569065_s_at | <i>C15orf62</i> | -2.3770864 | -1.2491944 | 2.3770864 | down | chr6:37450714-37467698 (-) // 82.19 // p21.2           |
| 225723_at    | <i>CCDC167</i>  | -2.3767288 | -1.2489773 | 2.3767288 | down | chr2:232597146-232645974 (-) // 95.05 // q37.1         |
| 204091_at    | <i>PDE6D</i>    | -2.3752053 | -1.2480522 | 2.3752053 | down | chr5:80708930-80710082 (-) // 84.05 // q14.1           |
| 238484_s_at  | <i>SSBP2</i>    | -2.3747602 | -1.2477818 | 2.3747602 | down | chr19:42583481-42585700 (+) // 99.19 // q13.2          |
| 218762_at    | <i>ZNF574</i>   | -2.3741984 | -1.2474406 | 2.3741984 | down | chr5:180217547-180230048 (-) // 96.56 // q35.3         |
| 201126_s_at  | <i>MGAT1</i>    | -2.3732882 | -1.2468872 | 2.3732882 | down | chr17:45195068-45266665 (-) // 96.65 // q21.32         |
| 217880_at    | <i>CDC27</i>    | -2.372158  | -1.2462001 | 2.372158  | down | chr22:42177402-42195460 (+) // 85.97 // q13.2          |
| 1554208_at   | <i>MEI1</i>     | -2.3714688 | -1.2457808 | 2.3714688 | down | chr22:21922018-21978323 (+) // 99.96 // q11.21         |
| 200676_s_at  | <i>UBE2L3</i>   | -2.371184  | -1.2456076 | 2.371184  | down |                                                        |

|             |           |            |            |           |      |                                                  |
|-------------|-----------|------------|------------|-----------|------|--------------------------------------------------|
| 224901_at   | SCD5      | -2.3710995 | -1.2455562 | 2.3710995 | down | chr4:83550691-83719661 (-) // 82.72 // q21.22    |
| 208368_s_at | BRCA2     | -2.370846  | -1.245402  | 2.370846  | down | chr13:32889616-32973805 (+) // 98.7 // q13.1     |
| 211941_s_at | PEBP1     | -2.3701792 | -1.2449962 | 2.3701792 | down | chr12:118573847-118583389 (+) // 96.63 // q24.23 |
| 205267_at   | POU2AF1   | -2.369556  | -1.2446167 | 2.369556  | down | chr11:111222982-111250417 (-) // 79.57 // q23.1  |
| 242923_at   | ZNF678    | -2.3692389 | -1.2444236 | 2.3692389 | down | chr1:227848466-227848945 (+) // 19.21 // q42.13  |
| 230260_s_at |           | -2.3673913 | -1.2432982 | 2.3673913 | down | chr3:16450929-16555158 (+) // 99.84 // p24.3     |
| 201764_at   | TMEM106C  | -2.3673348 | -1.2432638 | 2.3673348 | down | chr12:48357990-48362660 (+) // 93.41 // q13.11   |
| 224464_s_at | NUDT22    | -2.366346  | -1.242661  | 2.366346  | down | chr11:63993761-63997487 (+) // 96.98 // q13.1    |
| 201580_s_at | TMX4      | -2.365158  | -1.2419367 | 2.365158  | down | chr20:7957999-8000443 (-) // 86.89 // p12.3      |
| 224465_s_at | WIBG      | -2.3639193 | -1.2411808 | 2.3639193 | down | chr12:56295196-56321697 (-) // 96.53 // q13.2    |
| 201541_s_at | ZNHIT1    | -2.362332  | -1.2402118 | 2.362332  | down | chr7:100861446-100867469 (+) // 99.86 // q22.1   |
| 213528_at   | METTL18   | -2.3618917 | -1.2399429 | 2.3618917 | down | chr1:169761674-169764099 (-) // 98.89 // q24.2   |
| 235010_at   | ZBED5-AS1 | -2.361433  | -1.2396626 | 2.361433  | down | chr11:10879765-10900739 (+) // 29.22 // p15.3    |
| 201855_s_at | ATMIN     | -2.360987  | -1.2393901 | 2.360987  | down | chr16:81074129-81080951 (+) // 93.63 // q23.2    |
| 213719_s_at | SMARCA4   | -2.3569825 | -1.2369411 | 2.3569825 | down | chr19:11152143-11172920 (-) // 93.3 // p13.2     |
| 204441_s_at | POLA2     | -2.356632  | -1.2367265 | 2.356632  | down | chr11:65029706-65065058 (+) // 98.99 // q13.1    |
| 232309_at   | LOC202181 | -2.356122  | -1.2364142 | 2.356122  | down | chr5:177053359-177059702 (-) // 98.55 // q35.3   |
| 222238_s_at | POLM      | -2.3558066 | -1.2362211 | 2.3558066 | down | chr7:44111860-44122113 (-) // 86.34 // p13       |
| 230996_at   | LPP       | -2.354854  | -1.2356377 | 2.354854  | down | chr3:187870829-187871341 (+) // 69.73 // q27.3   |
| 216591_s_at | SDHC      | -2.3532467 | -1.2346525 | 2.3532467 | down | chr11:17457218-17457728 (-) // 99.8 // p15.1     |
| 230385_at   |           | -2.3521128 | -1.2339572 | 2.3521128 | down | chr5:126203406-126205219 (-) // 91.47 // q23.2   |
| 219512_at   | DSN1      | -2.350708  | -1.2330953 | 2.350708  | down | chr20:35380582-35402200 (-) // 65.97 // q11.23   |
| 211698_at   | EID1      | -2.345638  | -1.2299805 | 2.345638  | down | chr15:49170319-49172001 (+) // 91.16 // q21.1    |
| 201381_x_at | CACYBP    | -2.345075  | -1.229634  | 2.345075  | down | chr1:174969202-174979519 (+) // 99.91 // q25.1   |
| 219787_s_at | ECT2      | -2.34479   | -1.2294587 | 2.34479   | down | chr3:172520661-172539257 (+) // 99.9 // q26.31   |
| 222146_s_at | TCF4      | -2.3432374 | -1.2285031 | 2.3432374 | down | chr18:52895059-52897726 (-) // 77.03 // q21.2    |
| 227678_at   | XRCC6BP1  | -2.3431785 | -1.2284669 | 2.3431785 | down | chr12:58335331-58351052 (+) // 97.43 // q14.1    |
| 214193_s_at | DIEXF     | -2.343028  | -1.2283742 | 2.343028  | down | chr1:210025041-210025558 (+) // 66.22 // q32.2   |
| 205480_s_at | UGP2      | -2.34279   | -1.2282276 | 2.34279   | down | chr2:64069235-64118585 (+) // 98.74 // p15       |
| 200708_at   | GOT2      | -2.3386698 | -1.2256882 | 2.3386698 | down | chr16:58741036-58768140 (-) // 99.4 // q21       |
| 202998_s_at | LOXL2     | -2.338518  | -1.2255944 | 2.338518  | down | chr8:23154695-23261630 (-) // 99.8 // p21.3      |
| 217598_at   | CINP      | -2.3382902 | -1.225454  | 2.3382902 | down | chr14:102813489-102813958 (-) // 36.33 // q32.31 |
| 219676_at   | ZSCAN16   | -2.3379693 | -1.225256  | 2.3379693 | down | chr6:28092386-28097854 (+) // 96.43 // p22.1     |
| 230806_s_at | FAM65A    | -2.337823  | -1.2251657 | 2.337823  | down | chr17:56408244-56408537 (-) // 49.58 // q22      |
| 201774_s_at | NCAPD2    | -2.3358479 | -1.2239463 | 2.3358479 | down | chr12:6602544-6641125 (+) // 91.48 // p13.31     |
| 203206_at   | FAM53B    | -2.3354638 | -1.223709  | 2.3354638 | down | chr10:126307862-126395456 (-) // 99.26 // q26.13 |

3.Mar



|              |                    |            |            |           |      |                                                  |
|--------------|--------------------|------------|------------|-----------|------|--------------------------------------------------|
| 219004_s_at  | MIS18A             | -2.3354495 | -1.2237003 | 2.3354495 | down | chr21:33641262-33651348 (-) // 96.79 // q22.11   |
| 215037_s_at  | BCL2L1             | -2.3337815 | -1.2226695 | 2.3337815 | down | chr20:30309337-30310825 (-) // 99.67 // q11.21   |
| 223478_at    | TIMM8B             | -2.3337731 | -1.2226644 | 2.3337731 | down | chr11:111955873-111957432 (-) // 84.76 // q23.1  |
| 225434_at    | DEDD2              | -2.3335571 | -1.2225307 | 2.3335571 | down | chr19:42702749-42721874 (-) // 92.62 // q13.2    |
| 221250_s_at  | MXD3               | -2.3322668 | -1.2217329 | 2.3322668 | down | chr5:176734212-176738881 (-) // 95.51 // q35.3   |
| 221865_at    | C9orf91            | -2.3311174 | -1.2210217 | 2.3311174 | down | chr9:117406255-117408702 (+) // 34.59 // q32     |
| 212126_at    | CBX5               | -2.3310206 | -1.2209618 | 2.3310206 | down | chr12:54624727-54627691 (-) // 86.1 // q13.13    |
| 212055_at    | TPGS2              | -2.330558  | -1.2206755 | 2.330558  | down | chr18:34375589-34408987 (-) // 83.72 // q12.2    |
| 241866_at    | SLC16A7            | -2.3305285 | -1.2206571 | 2.3305285 | down | chr12:60175118-60175738 (+) // 95.3 // q14.1     |
| 225581_s_at  | MRPL50             | -2.3284535 | -1.2193722 | 2.3284535 | down | chr9:104152251-104160947 (-) // 91.11 // q31.1   |
| 228226_s_at  | ZNF775             | -2.3284087 | -1.2193443 | 2.3284087 | down | chr7:150095088-150095719 (+) // 90.06 // q36.1   |
| 237306_at    | ZNF829             | -2.3266623 | -1.2182618 | 2.3266623 | down | chr19:37383132-37406113 (-) // 98.69 // q13.12   |
| 208793_x_at  | SMARCA4            | -2.3261876 | -1.2179675 | 2.3261876 | down | chr19:11094795-11172949 (+) // 92.28 // p13.2    |
| 204766_s_at  | NUDT1              | -2.3255198 | -1.2175533 | 2.3255198 | down | chr7:2284194-2290780 (+) // 97.82 // p22.3       |
| 224753_at    | CDCA5              | -2.3253    | -1.2174169 | 2.3253    | down | chr11:64844924-64851528 (-) // 95.4 // q13.1     |
| 225116_at    | HIPK2              | -2.3246706 | -1.2170262 | 2.3246706 | down | chr7:139250462-139255185 (-) // 88.43 // q34     |
| 222027_at    | NUCKS1             | -2.3230262 | -1.2160054 | 2.3230262 | down |                                                  |
| 214115_at    | VAMP5              | -2.3221865 | -1.2154838 | 2.3221865 | down | chr2:85811556-85820515 (-) // 100.0 // p11.2     |
| 236248_x_at  | TADA2B             | -2.3204663 | -1.2144147 | 2.3204663 | down | chr4:7059272-7059681 (+) // 38.65 // p16.1       |
| 209096_at    | UBE2V2             | -2.3200903 | -1.214181  | 2.3200903 | down | chr8:48920992-48974128 (+) // 97.8 // q11.21     |
| 1555618_s_at | SAE1               | -2.3198984 | -1.2140616 | 2.3198984 | down | chr19:47634187-47712508 (+) // 100.0 // q13.32   |
| 208716_s_at  | TMCO1              | -2.3183208 | -1.2130802 | 2.3183208 | down | chr1:165696778-165738126 (-) // 100.0 // q24.1   |
| 225273_at    | WWC3               | -2.3168876 | -1.212188  | 2.3168876 | down | chrX:9983524-10112511 (+) // 94.91 // p22.2      |
| 229068_at    | CCT5               | -2.3167615 | -1.2121096 | 2.3167615 | down | chr5:10265953-10266866 (+) // 82.91 // p15.2     |
| 1557174_a_at | IRAK1BP1           | -2.3159225 | -1.211587  | 2.3159225 | down | chr6:79608328-79610965 (+) // 50.38 // q14.1     |
| 226539_s_at  | CCDC42B            | -2.3150413 | -1.2110379 | 2.3150413 | down | chr12:113596280-113600992 (+) // 85.87 // q24.13 |
| 224812_at    | HIBADH             | -2.314486  | -1.2106918 | 2.314486  | down | chr7:27565060-27702486 (-) // 94.15 // p15.2     |
| 200623_s_at  | CALM1///CALM2///C, | -2.314313  | -1.2105839 | 2.314313  | down | chr19:47104568-47114039 (+) // 99.32 // q13.32   |
| 227988_s_at  | VPS13A             | -2.314027  | -1.2104057 | 2.314027  | down | chr9:80031110-80032406 (+) // 96.84 // q21.2     |
| 231861_at    | LRP10              | -2.3134902 | -1.210071  | 2.3134902 | down | chr14:23347267-23634192 (+) // 87.06 // q11.2    |
| 235036_at    | LIX1L///LOC1010605 | -2.3125591 | -1.2094903 | 2.3125591 | down | chr1:145477149-145499930 (+) // 93.48 // q21.1   |
| 205037_at    | IFT27              | -2.3124394 | -1.2094156 | 2.3124394 | down | chr22:37154254-37172114 (-) // 100.0 // q12.3    |
| 209346_s_at  | PI4K2A             | -2.3103464 | -1.2081091 | 2.3103464 | down | chr10:99400470-99433843 (+) // 97.66 // q24.2    |
| 222775_s_at  | MRPL35             | -2.309365  | -1.2074963 | 2.309365  | down | chr2:86426594-86439964 (+) // 78.34 // p11.2     |
| 201900_s_at  | AKR1A1             | -2.3092725 | -1.2074385 | 2.3092725 | down | chr1:46027458-46035722 (+) // 95.32 // p34.1     |
| 201619_at    | PRDX3              | -2.307466  | -1.2063094 | 2.307466  | down | chr10:120927238-120938308 (-) // 98.77 // q26.11 |

|              |                     |            |            |           |      |                                                                                             |
|--------------|---------------------|------------|------------|-----------|------|---------------------------------------------------------------------------------------------|
| 201792_at    | <i>AEBP1</i>        | -2.3069444 | -1.2059833 | 2.3069444 | down | chr7:44144125-44154158 (+) // 94.84 // p13                                                  |
| 203744_at    | <i>HMGB3</i>        | -2.3060248 | -1.205408  | 2.3060248 | down | chrX:150151768-150157334 (+) // 95.84 // q28                                                |
| 204225_at    | <i>HDAC4</i>        | -2.3059666 | -1.2053716 | 2.3059666 | down | chr2:239970381-240322643 (-) // 91.23 // q37.3                                              |
| 234725_s_at  | <i>SEMA4B</i>       | -2.3057332 | -1.2052256 | 2.3057332 | down | chr15:90766788-90772890 (+) // 98.13 // q26.1                                               |
| 227606_s_at  | <i>STAMBPL1</i>     | -2.3056042 | -1.2051449 | 2.3056042 | down | chr10:90672857-90683244 (+) // 92.46 // q23.31                                              |
| 201021_s_at  | <i>DSTN</i>         | -2.3055935 | -1.2051382 | 2.3055935 | down | chr20:17550515-17588995 (+) // 98.19 // p12.1                                               |
| 213569_at    | <i>LOC100506603</i> | -2.303632  | -1.2039104 | 2.303632  | down | chr14:77247447-77249222 (-) // 98.6 // q24.3                                                |
| 1557985_s_at | <i>CEP78</i>        | -2.3035877 | -1.2038826 | 2.3035877 | down | chr9:80850995-80885964 (+) // 97.88 // q21.2                                                |
| 223239_at    | <i>GSKIP</i>        | -2.3014784 | -1.2025609 | 2.3014784 | down | chr14:96846020-96853561 (+) // 96.72 // q32.2                                               |
| 213550_s_at  | <i>IK//TMCO6</i>    | -2.301331  | -1.2024685 | 2.301331  | down | chr5:140024947-140027195 (+) // 100.0 // q31.3                                              |
| 224535_s_at  | <i>MRP63</i>        | -2.2998168 | -1.201519  | 2.2998168 | down | chr13:21751046-21751365 (+) // 99.07 // q12.11                                              |
| 208828_at    | <i>POLE3</i>        | -2.2991474 | -1.2010989 | 2.2991474 | down | chr9:116169520-116172644 (-) // 80.8 // q32                                                 |
| 225201_s_at  | <i>MRPL14</i>       | -2.296767  | -1.1996045 | 2.296767  | down | chr6:44081373-44095194 (-) // 97.3 // p21.1                                                 |
| 223158_s_at  | <i>NEK6</i>         | -2.2960894 | -1.1991788 | 2.2960894 | down | chr9:127019884-127114857 (+) // 88.88 // q33.3                                              |
| 209352_s_at  | <i>SIN3B</i>        | -2.296035  | -1.1991447 | 2.296035  | down | chr19:16940225-16991162 (+) // 61.65 // p13.11                                              |
| 236295_s_at  | <i>NLRC3</i>        | -2.2956808 | -1.198922  | 2.2956808 | down | chr16:3589029-3589462 (-) // 100.0 // p13.3                                                 |
| 218674_at    | <i>TRAPPC13</i>     | -2.2943184 | -1.1980656 | 2.2943184 | down | chr5:64920871-64961892 (+) // 90.87 // q12.3                                                |
| 203906_at    | <i>IQSEC1</i>       | -2.294133  | -1.197949  | 2.294133  | down | chr3:12938543-12983367 (-) // 98.0 // p25.2                                                 |
| 226278_at    | <i>SVIP</i>         | -2.2934985 | -1.1975499 | 2.2934985 | down | chr11:22843496-22851381 (-) // 99.73 // p14.3                                               |
| 212500_at    | <i>ADO</i>          | -2.292767  | -1.1970898 | 2.292767  | down | chr10:64564895-64568234 (+) // 98.96 // q21.3                                               |
| 211535_s_at  | <i>FGFR1</i>        | -2.2924006 | -1.1968591 | 2.2924006 | down | chr8:38270380-38326128 (-) // 97.82 // p11.23                                               |
| 223066_at    | <i>SNAPIN</i>       | -2.2908428 | -1.1958784 | 2.2908428 | down | chr1:153631199-153634305 (+) // 94.3 // q21.3                                               |
| 226546_at    | <i>LOC100506844</i> | -2.2895877 | -1.1950879 | 2.2895877 | down | chr12:58325231-58329950 (-) // 53.46 // q14.1                                               |
| 210290_at    | <i>ZNF174</i>       | -2.2888932 | -1.1946502 | 2.2888932 | down | chr16:3451243-3455042 (+) // 98.64 // p13.3                                                 |
| 212502_at    | <i>ADO</i>          | -2.2888563 | -1.1946269 | 2.2888563 | down | chr10:64564895-64568234 (+) // 98.96 // q21.3                                               |
| 218285_s_at  | <i>BDH2</i>         | -2.2885559 | -1.1944375 | 2.2885559 | down | chr6:99622560-99623581 (+) // 94.56 // q16.2///chr4:104000633-104020979 (-) // 97.61 // q24 |
| 232112_at    | <i>RALGPS2</i>      | -2.2873964 | -1.1937064 | 2.2873964 | down | chr1:178780449-178886391 (+) // 98.51 // q25.2                                              |
| 225110_at    | <i>OGFOD1</i>       | -2.2873034 | -1.1936477 | 2.2873034 | down | chr16:56485433-56513034 (+) // 78.12 // q12.2                                               |
| 1555758_a_at | <i>CDKN3</i>        | -2.2872508 | -1.1936145 | 2.2872508 | down | chr14:54866610-54878352 (+) // 96.81 // q22.2                                               |
| 225352_at    | <i>SEC62</i>        | -2.2866075 | -1.1932087 | 2.2866075 | down | chr3:169711986-169714250 (+) // 72.75 // q26.2                                              |
| 225420_at    | <i>GPAM</i>         | -2.2860174 | -1.1928364 | 2.2860174 | down | chr10:113909623-113933518 (-) // 90.76 // q25.2                                             |
| 224706_at    | <i>KIAA2013</i>     | -2.2854502 | -1.1924784 | 2.2854502 | down | chr1:11979647-11986453 (-) // 95.34 // p36.22                                               |
| 204082_at    | <i>PBX3</i>         | -2.2841992 | -1.1916885 | 2.2841992 | down | chr9:128509732-128729368 (+) // 99.96 // q33.3                                              |
| 224855_at    | <i>PYCR2</i>        | -2.2840376 | -1.1915864 | 2.2840376 | down | chr1:226107578-226111978 (-) // 84.72 // q42.12                                             |
| 202307_s_at  | <i>TAP1</i>         | -2.2835002 | -1.1912469 | 2.2835002 | down | chr6:32812986-32821623 (-) // 99.96 // p21.32                                               |

|              |                   |            |            |           |      |                                                  |
|--------------|-------------------|------------|------------|-----------|------|--------------------------------------------------|
| 201307_at    | 11.Sep            | -2.2832208 | -1.1910703 | 2.2832208 | down | chr4:77870868-77959854 (+) // 93.26 // q21.1     |
| 235767_x_at  | PHAX              | -2.28292   | -1.1908803 | 2.28292   | down | chr5:125962274-125962939 (+) // 49.85 // q23.2   |
| 222680_s_at  | DTL               | -2.2819705 | -1.1902801 | 2.2819705 | down | chr1:212209079-212278348 (+) // 96.34 // q32.3   |
| 208737_at    | ATP6V1G1          | -2.2818515 | -1.1902049 | 2.2818515 | down | chr9:117350044-117360335 (+) // 94.4 // q32      |
| 203360_s_at  | GJA9///GJA9-MYCB1 | -2.281818  | -1.1901836 | 2.281818  | down | chr1:39330167-39339009 (-) // 96.8 // p34.3      |
| 208848_at    | ADH5              | -2.2808743 | -1.1895869 | 2.2808743 | down | chr4:99992418-100006369 (-) // 75.23 // q23      |
| 212568_s_at  | DLAT              | -2.2789507 | -1.1883698 | 2.2789507 | down | chr11:111895877-111933941 (+) // 98.2 // q23.1   |
| 50221_at     | TFEB              | -2.2788637 | -1.1883147 | 2.2788637 | down | chr6:41651715-41652275 (-) // 64.51 // p21.1     |
| 228535_at    | RAD1              | -2.2784781 | -1.1880705 | 2.2784781 | down | chr5:34905368-34906196 (-) // 80.16 // p13.2     |
| 1555943_at   | PGAM5             | -2.276938  | -1.187095  | 2.276938  | down | chr12:133287667-133298066 (+) // 73.39 // q24.33 |
| 225940_at    | EIF4E3            | -2.276301  | -1.1866913 | 2.276301  | down | chr3:71728271-71733079 (-) // 84.18 // p13       |
| 209920_at    | BMPR2             | -2.2738297 | -1.1851242 | 2.2738297 | down | chr2:203242161-203424683 (+) // 100.0 // q33.1   |
| 238539_at    | HPS3              | -2.273384  | -1.1848414 | 2.273384  | down | chr3:148847401-148871407 (+) // 99.19 // q24     |
| 218633_x_at  | ABHD10            | -2.2725775 | -1.1843295 | 2.2725775 | down | chr3:111697898-111712056 (+) // 71.3 // q13.2    |
| 226638_at    | ARHGAP23          | -2.2723703 | -1.1841979 | 2.2723703 | down | chr17:36667190-36668628 (+) // 94.58 // q12      |
| 1569366_a_at | ZNF569            | -2.2693157 | -1.1822574 | 2.2693157 | down | chr19:37904852-37960178 (-) // 82.32 // q13.12   |
| 228828_at    | BZRAP1-AS1        | -2.2680993 | -1.1814839 | 2.2680993 | down | chr17:56414635-56431080 (+) // 89.19 // q22      |
| 225402_at    | TP53RK            | -2.2677953 | -1.1812904 | 2.2677953 | down | chr20:45314173-45318418 (-) // 73.21 // q13.12   |
| 218642_s_at  | CHCHD7            | -2.2675688 | -1.1811464 | 2.2675688 | down | chr8:57124356-57131174 (+) // 82.5 // q12.1      |
| 232645_at    | LOC153684         | -2.2675152 | -1.1811122 | 2.2675152 | down | chr5:43041676-43045734 (+) // 86.67 // p12       |
| 203415_at    | PDCD6             | -2.2673388 | -1.181     | 2.2673388 | down | chr5:271804-314916 (+) // 99.89 // p15.33        |
| 1552769_at   | ZNF625            | -2.26708   | -1.1808354 | 2.26708   | down | chr19:12255710-12267530 (-) // 91.41 // p13.2    |
| 226085_at    | CBX5              | -2.2664053 | -1.180406  | 2.2664053 | down | chr12:54628035-54630076 (-) // 84.35 // q13.13   |
| 213617_s_at  | TPGS2             | -2.266357  | -1.1803751 | 2.266357  | down | chr18:34366471-34408708 (-) // 67.26 // q12.2    |
| 215030_at    | GRSF1             | -2.2654479 | -1.1797962 | 2.2654479 | down | chr4:71682125-71684629 (-) // 40.57 // q13.3     |
| 223341_s_at  | SCOC              | -2.2653508 | -1.1797345 | 2.2653508 | down | chr4:141294784-141302507 (+) // 97.24 // q31.1   |
| 231921_at    | DCAF17            | -2.2650692 | -1.1795552 | 2.2650692 | down | chr2:172338888-172341334 (+) // 52.69 // q31.1   |
| 217189_s_at  | SMG7              | -2.2638855 | -1.1788011 | 2.2638855 | down | chr1:183502810-183521066 (+) // 99.96 // q25.3   |
| 227928_at    | PARBP             | -2.2631924 | -1.1783593 | 2.2631924 | down | chr12:102589890-102591298 (+) // 95.71 // q23.2  |
| 226117_at    | TIFA              | -2.262337  | -1.1778139 | 2.262337  | down | chr4:113197631-113207090 (-) // 96.63 // q25     |
| 201726_at    | ELAVL1            | -2.259424  | -1.175955  | 2.259424  | down | chr19:8027158-8056718 (-) // 88.86 // p13.2      |
| 227292_at    | C11orf84          | -2.2593172 | -1.1758868 | 2.2593172 | down | chr11:63580918-63595188 (+) // 93.6 // q13.1     |
| 212482_at    | RMND5A            | -2.2590134 | -1.1756928 | 2.2590134 | down | chr2:86947436-87005161 (+) // 97.24 // p11.2     |
| 224632_at    | GPATCH4           | -2.258574  | -1.1754122 | 2.258574  | down | chr1:156561575-156571302 (-) // 95.75 // q23.1   |
| 207181_s_at  | CASP7             | -2.2579226 | -1.174996  | 2.2579226 | down | chr10:115439694-115490655 (+) // 80.25 // q25.3  |
| 45749_at     | FAM65A            | -2.2573318 | -1.1746185 | 2.2573318 | down | chr16:67579439-67580688 (+) // 96.51 // q22.1    |

|              |                  |            |            |           |      |                                                |
|--------------|------------------|------------|------------|-----------|------|------------------------------------------------|
| 219041_s_at  | REPIN1           | -2.2572112 | -1.1745415 | 2.2572112 | down | chr7:150068257-150071126 (+) // 89.68 // q36.1 |
| 231065_at    | PDE6D            | -2.2569876 | -1.1743985 | 2.2569876 | down | chr2:232643720-232644182 (-) // 96.25 // q37.1 |
| 225686_at    | SKA2             | -2.256275  | -1.1739429 | 2.256275  | down | chr17:57187315-57232642 (-) // 70.12 // q22    |
| 219517_at    | ELL3             | -2.2557955 | -1.1736362 | 2.2557955 | down | chr15:44064821-44069184 (-) // 98.5 // q15.3   |
| 201003_x_at  | TMEM189//TMEM18  | -2.2556603 | -1.1735498 | 2.2556603 | down | chr20:48697660-48746181 (-) // 60.72 // q13.13 |
| 226500_at    | ZBTB47           | -2.255259  | -1.1732931 | 2.255259  | down | chr3:42704514-42709072 (+) // 95.82 // p22.1   |
| 206441_s_at  | COMMD4           | -2.2543774 | -1.172729  | 2.2543774 | down | chr15:75628399-75632612 (+) // 97.17 // q24.2  |
| 227876_at    | ARHGAP39         | -2.2532957 | -1.1720366 | 2.2532957 | down | chr8:145754562-145834058 (-) // 90.47 // q24.3 |
| 218112_at    | MRPS34           | -2.2531626 | -1.1719514 | 2.2531626 | down | chr16:1821896-1823140 (-) // 98.24 // p13.3    |
| 1564521_x_at | PRMT5            | -2.2530053 | -1.1718507 | 2.2530053 | down | chr14:23389732-23398585 (-) // 78.88 // q11.2  |
| 210023_s_at  | PCGF1            | -2.2520452 | -1.1712358 | 2.2520452 | down | chr2:74732170-74734786 (-) // 96.24 // p13.1   |
| 230936_at    | DNAJB13          | -2.25185   | -1.1711106 | 2.25185   | down | chr11:73676042-73681321 (+) // 96.2 // q13.4   |
| 220251_at    | DIEXF            | -2.250977  | -1.1705513 | 2.250977  | down | chr1:210028397-210030908 (+) // 70.3 // q32.2  |
| 240718_at    |                  | -2.2494683 | -1.169584  | 2.2494683 | down | chr12:25255751-25256226 (+) // 42.26 // p12.1  |
| 207305_s_at  | TRAPPC8          | -2.248799  | -1.1691548 | 2.248799  | down | chr18:29410174-29522784 (-) // 99.94 // q12.1  |
| 203033_x_at  | FH               | -2.2475772 | -1.1683707 | 2.2475772 | down | chr1:241661086-241680617 (-) // 94.54 // q43   |
| 225712_at    | GEMIN5           | -2.2473698 | -1.1682376 | 2.2473698 | down | chr5:154266872-154317746 (-) // 97.42 // q33.2 |
| 215711_s_at  | WEE1             | -2.2470362 | -1.1680233 | 2.2470362 | down | chr11:9595227-9610149 (+) // 88.49 // p15.4    |
| 226529_at    | TMEM106B         | -2.2468996 | -1.1679357 | 2.2468996 | down | chr7:12275705-12276890 (+) // 97.77 // p21.3   |
| 213170_at    | GPX7             | -2.246502  | -1.1676803 | 2.246502  | down | chr1:53068066-53074723 (+) // 82.24 // p32.3   |
| 204444_at    | KIF11            | -2.245932  | -1.1673143 | 2.245932  | down | chr10:94352990-94415150 (+) // 93.85 // q23.33 |
| 201391_at    | TRAP1            | -2.2450268 | -1.1667327 | 2.2450268 | down | chr16:3708038-3767513 (-) // 99.28 // p13.3    |
| 1553221_at   | ZNF583           | -2.2434185 | -1.1656988 | 2.2434185 | down | chr19:56915717-56936400 (+) // 76.54 // q13.43 |
| 227741_at    | PTPLB            | -2.2431898 | -1.1655517 | 2.2431898 | down | chr3:123212094-123303868 (-) // 75.46 // q21.1 |
| 221733_s_at  | GPATCH4          | -2.2423332 | -1.1650007 | 2.2423332 | down | chr1:156561575-156571302 (+) // 95.75 // q23.1 |
| 225632_s_at  | ISY1-RAB43//RAB4 | -2.2404811 | -1.1638086 | 2.2404811 | down | chr3:128806415-128880073 (-) // 98.66 // q21.3 |
| 204639_at    | ADA              | -2.2404501 | -1.1637886 | 2.2404501 | down | chr20:43248163-43280343 (-) // 99.8 // q13.12  |
| 228345_at    | CHIC1            | -2.239339  | -1.1630731 | 2.239339  | down | chrX:72905739-72906944 (+) // 80.18 // q13.2   |
| 241602_at    | ZNF582           | -2.2392037 | -1.1629858 | 2.2392037 | down | chr19:56896258-56904846 (-) // 96.43 // q13.43 |
| 213819_s_at  | FLOT1            | -2.2385547 | -1.1625676 | 2.2385547 | down | chr6:30698462-30709077 (+) // 97.78 // p21.33  |
| 218123_at    | C21orf59         | -2.238491  | -1.1625265 | 2.238491  | down | chr21:33974108-33984913 (-) // 97.83 // q22.11 |
| 203456_at    | PRAF2            | -2.238407  | -1.1624724 | 2.238407  | down | chrX:48928817-48931662 (-) // 100.0 // p11.23  |
| 205449_at    | SAC3D1           | -2.2372015 | -1.1616951 | 2.2372015 | down | chr11:64808441-64812299 (+) // 96.77 // q13.1  |
| 223156_at    | MRPS23           | -2.236957  | -1.1615375 | 2.236957  | down | chr17:55916913-55927399 (-) // 97.88 // q22    |
| 222663_at    | RIOK2            | -2.2367537 | -1.1614064 | 2.2367537 | down | chr5:96496571-96518951 (-) // 91.5 // q15      |
| 222776_at    | MAGOHB           | -2.2356007 | -1.1606625 | 2.2356007 | down | chr12:10756659-10766208 (-) // 87.43 // p13.2  |

|              |                |            |            |           |      |                                                 |
|--------------|----------------|------------|------------|-----------|------|-------------------------------------------------|
| 226255_at    | ZBTB33         | -2.2347782 | -1.1601317 | 2.2347782 | down | chrX:119390110-119392252 (+) // 98.98 // q24    |
| 226027_at    | SWI5           | -2.2345657 | -1.1599945 | 2.2345657 | down | chr9:131038522-131051268 (+) // 90.83 // q34.11 |
| 202108_at    | PEPD           | -2.2344415 | -1.1599143 | 2.2344415 | down | chr19:33877858-34012682 (-) // 99.21 // q13.11  |
| 235618_at    | ZNF507         | -2.233583  | -1.1593598 | 2.233583  | down | chr19:32873394-32874160 (+) // 97.31 // q13.11  |
| 219279_at    | DOCK10         | -2.2330265 | -1.1590004 | 2.2330265 | down | chr2:225629807-225661715 (-) // 98.89 // q36.2  |
| 1555910_at   | PTCD2          | -2.2318444 | -1.1582365 | 2.2318444 | down | chr5:71616199-71655495 (+) // 85.54 // q13.2    |
| 222710_at    | AMIGO3///GMPPB | -2.2304523 | -1.1573364 | 2.2304523 | down | chr3:49757346-49761384 (-) // 89.34 // p21.31   |
| 229742_at    | C15orf61       | -2.229259  | -1.1565642 | 2.229259  | down | chr15:67813673-67818997 (+) // 89.55 // q23     |
| 1554572_a_at | SUV39H2        | -2.2288973 | -1.1563301 | 2.2288973 | down | chr10:14920846-14945078 (+) // 93.2 // p13      |
| 227829_at    | GYLTL1B        | -2.2279155 | -1.1556946 | 2.2279155 | down | chr11:45949904-45950647 (+) // 91.53 // p11.2   |
| 224879_at    | C9orf123       | -2.2273967 | -1.1553586 | 2.2273967 | down | chr9:7796496-7799790 (-) // 67.26 // p24.1      |
| 1557674_s_at | EFCAB2         | -2.227228  | -1.1552492 | 2.227228  | down | chr1:245132536-245134390 (-) // 91.47 // q44    |
| 213297_at    | RMND5B         | -2.2271144 | -1.1551757 | 2.2271144 | down | chr5:177576463-177580859 (+) // 92.62 // q35.3  |
| 1556061_at   | RPP30          | -2.2260375 | -1.154478  | 2.2260375 | down | chr10:92664395-92668315 (+) // 46.29 // q23.31  |
| 201577_at    | NME1           | -2.225822  | -1.1543382 | 2.225822  | down | chr17:49230943-49239395 (+) // 100.0 // q21.33  |
| 1556551_s_at | SLC39A6        | -2.2257757 | -1.1543082 | 2.2257757 | down | chr18:33702020-33706678 (-) // 89.82 // q12.2   |
| 1554193_s_at | MANEA          | -2.2223005 | -1.152054  | 2.2223005 | down | chr6:96025418-96035256 (+) // 81.56 // q16.1    |
| 204862_s_at  | NME3           | -2.2220182 | -1.1518707 | 2.2220182 | down | chr16:1820344-1821553 (-) // 96.94 // p13.3     |
| 213840_s_at  | MRPS12         | -2.2211144 | -1.1512837 | 2.2211144 | down | chr19:39423191-39423660 (-) // 73.0 // q13.2    |
| 223436_s_at  | TRPT1          | -2.2204077 | -1.1508247 | 2.2204077 | down | chr11:63991271-63993623 (-) // 85.43 // q13.1   |
| 1552618_at   | STX6           | -2.2188647 | -1.1498218 | 2.2188647 | down | chr1:180945103-180992046 (-) // 98.59 // q25.3  |
| 233588_x_at  | PFDN6          | -2.218266  | -1.1494324 | 2.218266  | down | chr6:33257548-33258709 (+) // 93.07 // p21.32   |
| 226736_at    | CHURC1         | -2.2177947 | -1.1491258 | 2.2177947 | down | chr14:65400925-65402086 (+) // 53.84 // q23.3   |
| 211192_s_at  | CD84           | -2.2171345 | -1.1486963 | 2.2171345 | down | chr1:160523538-160549294 (-) // 99.18 // q23.3  |
| 1553101_a_at | ALKBH5         | -2.2170544 | -1.1486441 | 2.2170544 | down | chr17:18087181-18112831 (+) // 91.38 // p11.2   |
| 222037_at    | MCM4           | -2.2164907 | -1.1482774 | 2.2164907 | down | chr8:48889730-48890717 (+) // 56.27 // q11.21   |
| 238075_at    | CHEK1          | -2.2145734 | -1.1470288 | 2.2145734 | down | chr11:125526608-125527038 (+) // 79.91 // q24.2 |
| 1554941_at   | KLHL14         | -2.2144005 | -1.1469162 | 2.2144005 | down | chr18:30321890-30352842 (-) // 79.83 // q12.1   |
| 242927_at    | DCLRE1C        | -2.2143142 | -1.14686   | 2.2143142 | down | chr10:14939357-14940311 (-) // 78.03 // p13     |
| 218519_at    | SLC35A5        | -2.2141423 | -1.146748  | 2.2141423 | down | chr3:112280953-112303002 (+) // 96.56 // q13.2  |
| 209001_s_at  | ANAPC13        | -2.21413   | -1.1467398 | 2.21413   | down | chr3:134196549-134204829 (-) // 97.34 // q22.2  |
| 226532_at    |                | -2.214119  | -1.1467327 | 2.214119  | down | chr1:9986357-9987898 (-) // 61.2 // p36.22      |
| 212520_s_at  | SMARCA4        | -2.2131705 | -1.1461146 | 2.2131705 | down | chr19:11071605-11134274 (+) // 90.99 // p13.2   |
| 211048_s_at  | PDIA4          | -2.21205   | -1.145384  | 2.21205   | down | chr7:148700542-148725735 (-) // 87.46 // q36.1  |
| 230696_at    | LOC100289092   | -2.209285  | -1.1435796 | 2.209285  | down | chr16:28890277-28891041 (-) // 86.33 // p11.2   |
| 1553218_a_at | ZNF512         | -2.207171  | -1.1421983 | 2.207171  | down | chr2:27805892-27845443 (+) // 99.52 // p23.3    |

|              |                   |            |            |           |      |                                                        |
|--------------|-------------------|------------|------------|-----------|------|--------------------------------------------------------|
| 202173_s_at  | VEZF1             | -2.2062821 | -1.1416173 | 2.2062821 | down | chr17:56051119-56065513 (-) // 97.83 // q22            |
| 225175_s_at  | SLC44A2           | -2.205625  | -1.1411875 | 2.205625  | down | chr19:10754489-10755233 (+) // 86.61 // p13.2          |
| 223092_at    | ANKH              | -2.2043698 | -1.1403663 | 2.2043698 | down | chr5:14708956-14871781 (-) // 89.53 // p15.2           |
| 225816_at    | PHF17             | -2.2035487 | -1.1398288 | 2.2035487 | down | chr4:129794402-129796379 (+) // 92.23 // q28.2         |
| 222608_s_at  | ANLN              | -2.2032719 | -1.1396475 | 2.2032719 | down | chr7:36429480-36493400 (+) // 96.26 // p14.2           |
| 222811_at    | FTSJD1            | -2.20272   | -1.139286  | 2.20272   | down | chr16:71316204-71319957 (-) // 99.36 // q22.2          |
|              |                   |            |            |           |      | chr3:195415227-195416589 (+) // 48.64 //               |
|              |                   |            |            |           |      | q29///chr5:263245-264610 (+) // 44.9 //                |
| 226693_at    | LINC00969//SDHAF  | -2.2019298 | -1.1387686 | 2.2019298 | down | p15.33///chr3:195685772-195687133 (-) // 44.39 // q29  |
| 213454_at    | APITD1//APITD1-CC | -2.2016823 | -1.1386063 | 2.2016823 | down | chr1:10490519-10502865 (+) // 93.11 // p36.22          |
| 222622_at    | PGP               | -2.2013125 | -1.138364  | 2.2013125 | down | chr16:2261998-2264843 (-) // 95.03 // p13.3            |
| 1555797_a_at | ARPC5             | -2.2008073 | -1.1380329 | 2.2008073 | down | chr1:183596557-183604850 (-) // 94.86 // q25.3         |
| 200644_at    | MARCKSL1          | -2.199903  | -1.1374398 | 2.199903  | down | chr1:32799464-32801647 (-) // 100.0 // p35.1           |
| 229025_s_at  | IMMP1L            | -2.1991324 | -1.1369345 | 2.1991324 | down | chr11:31453473-31455296 (-) // 99.46 // p13            |
| 226081_at    | LZIC              | -2.1987386 | -1.1366761 | 2.1987386 | down | chr1:9988997-10002843 (-) // 77.85 // p36.22           |
| 225593_at    | LSM10             | -2.1973155 | -1.135742  | 2.1973155 | down | chr1:36859032-36863719 (-) // 85.5 // p34.3            |
| 221688_s_at  | IMP3              | -2.1972957 | -1.1357291 | 2.1972957 | down | chr15:75931438-75932552 (-) // 93.4 // q24.2           |
|              |                   |            |            |           |      | chr2:162933023-162934196 (-) // 96.92 //               |
|              |                   |            |            |           |      | q24.2///chrX:100600649-100603687 (-) // 99.74 // q22.1 |
| 205217_at    | TIMM8A            | -2.1963933 | -1.1351364 | 2.1963933 | down | chr8:126010754-126021476 (+) // 98.92 // q24.13        |
| 213577_at    | SQLE              | -2.1947513 | -1.1340574 | 2.1947513 | down | chr3:183173419-183173798 (+) // 90.67 // q27.1         |
| 236798_at    | LINC00888         | -2.1930366 | -1.1329298 | 2.1930366 | down | chr5:95152210-95158366 (-) // 95.32 // q15             |
| 209276_s_at  | GLRX              | -2.192043  | -1.1322762 | 2.192043  | down | chr9:135136743-135187235 (-) // 97.62 // q34.13        |
| 201964_at    | SETX              | -2.1919563 | -1.132219  | 2.1919563 | down | chr11:925879-1012239 (+) // 93.29 // p15.5             |
| 215764_x_at  | AP2A2             | -2.1914594 | -1.131892  | 2.1914594 | down | chr20:42146935-42147491 (+) // 54.88 // q13.12         |
| 242637_at    |                   | -2.1871533 | -1.1290543 | 2.1871533 | down | chr2:113495446-113496130 (-) // 86.34 // q13           |
| 229610_at    | CKAP2L            | -2.1868353 | -1.1288446 | 2.1868353 | down | chr2:206986694-206987188 (-) // 51.64 // q33.3         |
| 229647_at    | NDUFS1            | -2.1865    | -1.1286234 | 2.1865    | down | chr15:86220267-86288841 (+) // 85.01 // q25.3          |
| 209535_s_at  |                   | -2.1862829 | -1.1284801 | 2.1862829 | down | chr10:93024244-93039736 (+) // 99.89 // q23.32         |
| 235331_x_at  | PCGF5             | -2.1861906 | -1.1284192 | 2.1861906 | down | chr12:31226831-31257725 (+) // 99.07 //                |
|              |                   |            |            |           |      | p11.21///chr12:9436305-9466684 (+) // 97.12 //         |
|              |                   |            |            |           |      | p13.31///chr12:9570308-9600764 (-) // 97.15 // p13.31  |
| 208159_x_at  | DDX11             | -2.185553  | -1.1279984 | 2.185553  | down | chr6:131571500-131604672 (+) // 77.2 // q23.2          |
| 205771_s_at  | AKAP7             | -2.1853995 | -1.127897  | 2.1853995 | down | chr14:74524369-74527377 (-) // 55.59 // q24.3          |
| 221589_s_at  | ALDH6A1           | -2.1852274 | -1.1277834 | 2.1852274 | down | chr11:119531704-119533731 (-) // 96.44 // q23.3        |
| 225211_at    | PVRL1             | -2.1843445 | -1.1272004 | 2.1843445 | down | chr11:74699955-74717618 (+) // 99.69 // q13.4          |
| 216083_s_at  | NEU3              | -2.1843061 | -1.1271751 | 2.1843061 | down |                                                        |

|              |                        |            |            |           |      |                                                 |
|--------------|------------------------|------------|------------|-----------|------|-------------------------------------------------|
| 203755_at    | <i>BUB1B</i>           | -2.1808984 | -1.1249225 | 2.1808984 | down | chr15:40453379-40513321 (+) // 99.19 // q15.1   |
| 200684_s_at  | <i>UBE2L3</i>          | -2.180539  | -1.1246847 | 2.180539  | down | chr22:21922007-21978323 (+) // 95.93 // q11.21  |
| 203371_s_at  | <i>NDUFB3</i>          | -2.180051  | -1.124362  | 2.180051  | down | chr2:201936533-201950464 (+) // 97.26 // q33.1  |
| 225156_at    | <i>ELOF1</i>           | -2.1798565 | -1.1242332 | 2.1798565 | down | chr19:11663860-11666282 (-) // 71.15 // p13.2   |
| 234990_at    | <i>CBX5</i>            | -2.1798458 | -1.1242261 | 2.1798458 | down | chr12:54632581-54634859 (-) // 92.43 // q13.13  |
| 1552310_at   | <i>C15orf40</i>        | -2.1791556 | -1.1237692 | 2.1791556 | down | chr15:83672957-83680390 (-) // 53.86 // q25.2   |
| 221620_s_at  | <i>APOO</i>            | -2.1785936 | -1.1233971 | 2.1785936 | down | chrX:23851483-23926020 (-) // 99.24 // p22.11   |
| 1554508_at   | <i>PIK3AP1</i>         | -2.1771245 | -1.1224239 | 2.1771245 | down | chr10:98354965-98388250 (-) // 77.86 // q24.1   |
| 235069_at    | <i>TATDN3</i>          | -2.176918  | -1.122287  | 2.176918  | down | chr1:212965225-212989014 (+) // 83.81 // q32.3  |
| 200984_s_at  | <i>CD59</i>            | -2.1757612 | -1.1215203 | 2.1757612 | down | chr11:33730138-33758025 (-) // 97.55 // p13     |
| 218022_at    | <i>VRK3</i>            | -2.1754754 | -1.1213306 | 2.1754754 | down | chr19:50479723-50528577 (-) // 99.89 // q13.33  |
| 219493_at    | <i>SHCBP1</i>          | -2.1749306 | -1.1209694 | 2.1749306 | down | chr16:46614472-46642243 (-) // 86.26 // q11.2   |
| 235919_at    | <i>CEP78</i>           | -2.1745646 | -1.1207266 | 2.1745646 | down | chr9:80892610-80893405 (+) // 66.39 // q21.2    |
| 220140_s_at  | <i>SNX11</i>           | -2.1743522 | -1.1205857 | 2.1743522 | down | chr17:46184946-46200105 (+) // 98.89 // q21.32  |
| 201719_s_at  | <i>EPB41L2</i>         | -2.1740463 | -1.1203827 | 2.1740463 | down | chr6:131160489-131277640 (-) // 97.28 // q23.1  |
| 211189_x_at  | <i>CD84</i>            | -2.170638  | -1.1181192 | 2.170638  | down | chr1:160518034-160549294 (-) // 99.73 // q23.3  |
| 221505_at    | <i>ANP32E</i>          | -2.170433  | -1.1179829 | 2.170433  | down | chr1:150190719-150208508 (-) // 91.82 // q21.2  |
| 232184_at    | <i>ALS2</i>            | -2.1703894 | -1.1179539 | 2.1703894 | down | chr2:202624179-202645662 (-) // 87.68 // q33.1  |
| 1559895_x_at |                        | -2.1703024 | -1.1178961 | 2.1703024 | down | chr4:154412463-154413324 (+) // 45.35 // q31.3  |
| 222350_at    |                        | -2.1694574 | -1.1173342 | 2.1694574 | down | chr1:147094879-147095147 (+) // 54.94 // q21.2  |
| 224923_at    | <i>TTC7A</i>           | -2.1690185 | -1.1170423 | 2.1690185 | down | chr2:47185624-47303262 (+) // 98.3 // p21       |
| 203271_s_at  | <i>UNC119</i>          | -2.168088  | -1.1164232 | 2.168088  | down | chr17:26873724-26879629 (-) // 98.91 // q11.2   |
| 238561_s_at  | <i>UTP23</i>           | -2.1672125 | -1.1158407 | 2.1672125 | down | chr8:117784182-117785428 (+) // 63.97 // q24.11 |
| 228639_at    |                        | -2.166918  | -1.1156446 | 2.166918  | down | chrX:54473345-54474619 (+) // 74.22 // p11.22   |
| 201093_x_at  | <i>SDHA</i>            | -2.1640656 | -1.1137443 | 2.1640656 | down | chr5:218446-256792 (+) // 99.47 // p15.33       |
| 201612_at    | <i>ALDH9A1</i>         | -2.1634529 | -1.1133357 | 2.1634529 | down | chr1:165631452-165668100 (-) // 93.33 // q24.1  |
| 204342_at    | <i>SLC25A24</i>        | -2.1632562 | -1.1132045 | 2.1632562 | down | chr1:108677448-108678726 (-) // 98.69 // p13.3  |
| 227007_at    | <i>TMCO4</i>           | -2.1628258 | -1.1129174 | 2.1628258 | down | chr1:20008706-20009884 (-) // 89.3 // p36.13    |
| 211733_x_at  | <i>SCP2</i>            | -2.1620796 | -1.1124196 | 2.1620796 | down | chr1:53480619-53517278 (+) // 95.76 // p32.3    |
| 206948_at    | <i>NEU3</i>            | -2.162079  | -1.1124194 | 2.162079  | down | chr11:74699742-74718129 (+) // 93.18 // q13.4   |
| 218886_at    | <i>PAK1IP1</i>         | -2.161058  | -1.1117377 | 2.161058  | down | chr6:10695189-10709968 (+) // 92.66 // p24.2    |
| 203714_s_at  | <i>TBCE</i>            | -2.1603775 | -1.1112834 | 2.1603775 | down | chr1:235530770-235612280 (+) // 99.15 // q42.3  |
| 235053_at    | <i>OTTHUMG0000017i</i> | -2.1603184 | -1.111244  | 2.1603184 | down | chr17:53034031-53034720 (-) // 30.03 // q22     |
| 51176_at     | <i>MED27</i>           | -2.1591763 | -1.110481  | 2.1591763 | down | chr9:134735498-134955238 (-) // 87.07 // q34.13 |
| 226670_s_at  | <i>PABPC1L</i>         | -2.1588194 | -1.1102426 | 2.1588194 | down | chr20:43538742-43567957 (+) // 94.95 // q13.12  |
| 218795_at    | <i>ACP6</i>            | -2.1587687 | -1.1102086 | 2.1587687 | down | chr1:147119173-147142546 (-) // 98.79 // q21.2  |

|              |                   |            |            |           |      |                                                     |
|--------------|-------------------|------------|------------|-----------|------|-----------------------------------------------------|
| 201677_at    | <i>C3orf37</i>    | -2.1586375 | -1.110121  | 2.1586375 | down | chr3:128998550-129025029 (+) // 93.48 // q21.3      |
| 201633_s_at  | <i>CYB5B</i>      | -2.1578634 | -1.1096035 | 2.1578634 | down | chr16:69458438-69497780 (+) // 90.99 // q22.1       |
| 217987_at    | <i>ASNSD1</i>     | -2.1572752 | -1.1092103 | 2.1572752 | down | chr2:190526145-190535555 (+) // 98.45 // q32.2      |
| 225306_s_at  | <i>SLC25A29</i>   | -2.1570666 | -1.1090707 | 2.1570666 | down | chr14:100757454-100772801 (-) // 91.57 // q32.2     |
| 217403_s_at  | <i>ZNF227</i>     | -2.1568425 | -1.1089208 | 2.1568425 | down | chr19:44732598-44740983 (+) // 100.0 // q13.31      |
| 226789_at    | <i>EMB</i>        | -2.1559994 | -1.1083568 | 2.1559994 | down | chr5:49692030-49693820 (-) // 81.04 // q11.1        |
| 205603_s_at  | <i>DIAPH2</i>     | -2.1559625 | -1.108332  | 2.1559625 | down | chrX:95939710-96724830 (+) // 99.23 // q21.33       |
| 201460_at    | <i>MAPKAPK2</i>   | -2.1559029 | -1.1082922 | 2.1559029 | down | chr1:206858288-206907628 (+) // 83.91 // q32.1      |
| 219713_at    | <i>SHPK</i>       | -2.1557167 | -1.1081675 | 2.1557167 | down | chr17:3511555-3539616 (-) // 80.22 // p13.2         |
| 212535_at    | <i>MEF2A</i>      | -2.1539354 | -1.106975  | 2.1539354 | down | chr15:100254887-100256688 (+) // 98.68 // q26.3     |
| 216484_x_at  |                   | -2.1533756 | -1.1065999 | 2.1533756 | down | chr1:156711901-156712429 (-) // 38.95 // q23.1      |
| 218264_at    | <i>BCCIP</i>      | -2.1526487 | -1.1061128 | 2.1526487 | down | chr10:127512114-127542090 (+) // 87.75 // q26.2     |
| 244569_at    | <i>C8orf37</i>    | -2.1525738 | -1.1060627 | 2.1525738 | down | chr8:96257140-96257817 (-) // 63.4 // q22.1         |
| 218883_s_at  | <i>MLF1IP</i>     | -2.1524272 | -1.1059644 | 2.1524272 | down | chr4:185616157-185650164 (-) // 95.75 // q35.1      |
| 218535_s_at  | <i>RIOK2</i>      | -2.1521194 | -1.1057582 | 2.1521194 | down | chr5:96498640-96518944 (-) // 99.78 // q15          |
| 227319_at    | <i>KLHL36</i>     | -2.1518328 | -1.105566  | 2.1518328 | down | chr16:84700662-84701290 (+) // 88.72 // q24.1       |
| 218640_s_at  | <i>PLEKHF2</i>    | -2.1509547 | -1.1049771 | 2.1509547 | down | chr8:96146175-96168912 (+) // 97.66 // q22.1        |
| 209152_s_at  | <i>TCF3</i>       | -2.1505048 | -1.1046754 | 2.1505048 | down | chr19:1609291-1650291 (-) // 94.42 // p13.3         |
| 1553940_a_at | <i>LRRC28</i>     | -2.1503386 | -1.1045638 | 2.1503386 | down | chr15:99791745-99926472 (+) // 93.77 // q26.3       |
| 200965_s_at  | <i>ABLIM1</i>     | -2.1484067 | -1.1032672 | 2.1484067 | down | chr10:116190871-116286585 (-) // 99.05 // q25.3     |
| 212333_at    | <i>FAM98A</i>     | -2.1483674 | -1.1032407 | 2.1483674 | down | chr2:33808728-33824354 (-) // 96.6 // p22.3         |
| 228009_x_at  | <i>ZNRD1</i>      | -2.1478107 | -1.1028669 | 2.1478107 | down | chr6:30029033-30032678 (+) // 96.97 // p22.1        |
| 202282_at    | <i>HSD17B10</i>   | -2.1458557 | -1.1015531 | 2.1458557 | down | chrX:53458209-53461320 (-) // 96.46 // p11.22       |
| 235088_at    | <i>C4orf46</i>    | -2.1458542 | -1.101552  | 2.1458542 | down | chr4:159589368-159593005 (-) // 90.27 // q32.1      |
| 222805_at    | <i>MANEA</i>      | -2.1443684 | -1.1005528 | 2.1443684 | down | chr6:96025418-96057323 (+) // 88.59 // q16.1        |
| 222386_s_at  | <i>COPZ1</i>      | -2.144306  | -1.1005108 | 2.144306  | down | chr12:54718926-54744659 (+) // 95.98 // q13.13      |
| 230431_at    |                   | -2.1439154 | -1.100248  | 2.1439154 | down | chr1:9485152-9485814 (-) // 59.94 // p36.22         |
| 222843_at    | <i>FIGNL1</i>     | -2.1433852 | -1.0998912 | 2.1433852 | down | chr7:50511830-50518048 (-) // 89.25 // p12.1        |
|              |                   |            |            |           |      | chrX:30671654-30745671 (+) // 98.92 //              |
|              |                   |            |            |           |      | p21.2///chr4:166199135-166200797 (-) // 97.95 //    |
|              |                   |            |            |           |      | q32.3///chr4:120314450-120316112 (-) // 97.17 //    |
|              |                   |            |            |           |      | q26///chrX:101033851-101035512 (-) // 99.4 // q22.1 |
| 217167_x_at  | <i>GK</i>         | -2.143003  | -1.0996338 | 2.143003  | down | chr17:56414635-56431080 (+) // 89.19 // q22         |
| 228826_at    | <i>BZRAP1-AS1</i> | -2.1429896 | -1.0996249 | 2.1429896 | down | chr19:11094795-11172492 (+) // 93.94 // p13.2       |
| 215714_s_at  | <i>SMARCA4</i>    | -2.142919  | -1.0995774 | 2.142919  | down | chr18:56807124-56826061 (+) // 98.11 // q21.32      |
| 223299_at    | <i>SEC11C</i>     | -2.1425462 | -1.0993264 | 2.1425462 | down | chr4:76871068-76903135 (-) // 92.99 // q21.1        |
| 218607_s_at  | <i>SDAD1</i>      | -2.1413467 | -1.0985184 | 2.1413467 | down |                                                     |



|              |                          |            |            |           |      |                                                    |
|--------------|--------------------------|------------|------------|-----------|------|----------------------------------------------------|
| 1556062_at   | <i>RPP30</i>             | -2.1402705 | -1.0977931 | 2.1402705 | down | chr10:92664395-92668315 (+) // 46.29 // q23.31     |
| 1563792_at   | <i>AMN</i>               | -2.1402678 | -1.0977914 | 2.1402678 | down | chr14:103394981-103399933 (+) // 96.54 // q32.32   |
| 238858_at    | <i>TIFA</i>              | -2.140267  | -1.0977907 | 2.140267  | down | chr4:113196445-113197439 (-) // 73.63 // q25       |
| 214919_s_at  | <i>ANKHD1///ANKHD1-</i>  | -2.1402307 | -1.0977663 | 2.1402307 | down | chr5:139908410-139929161 (+) // 96.53 // q31.3     |
| 242807_at    | <i>FSD1L</i>             | -2.139571  | -1.0973215 | 2.139571  | down | chr9:108310286-108311385 (+) // 99.1 // q31.2      |
| 225210_s_at  | <i>FAM103A1</i>          | -2.1394072 | -1.0972111 | 2.1394072 | down | chr15:83654958-83659802 (+) // 95.23 // q25.2      |
| 211453_s_at  | <i>AKT2</i>              | -2.135846  | -1.0948076 | 2.135846  | down | chr19:40739794-40791194 (-) // 86.59 // q13.2      |
| 202041_s_at  | <i>FIBP</i>              | -2.1346354 | -1.0939897 | 2.1346354 | down | chr11:65651398-65655900 (-) // 99.3 // q13.1       |
| 202077_at    | <i>NDUFAB1</i>           | -2.133588  | -1.0932817 | 2.133588  | down | chr16:23592334-23607635 (-) // 99.7 // p12.2       |
| 220032_at    | <i>CPED1</i>             | -2.1320138 | -1.0922167 | 2.1320138 | down | chr7:120704289-120901971 (+) // 83.04 // q31.31    |
| 229525_at    |                          | -2.130863  | -1.0914378 | 2.130863  | down | chr3:63820883-63849579 (+) // 89.79 // p14.1       |
| 229863_s_at  | <i>ELP6</i>              | -2.130351  | -1.0910912 | 2.130351  | down | chr3:47542928-47555153 (-) // 95.96 // p21.31      |
| 205541_s_at  | <i>GSPT2</i>             | -2.1298587 | -1.0907577 | 2.1298587 | down | chrX:51486543-51489023 (+) // 99.76 // p11.22      |
| 227689_at    | <i>ZNF227</i>            | -2.1288204 | -1.0900543 | 2.1288204 | down | chr19:44739850-44741420 (+) // 98.68 // q13.31     |
| 219111_s_at  | <i>DDX54</i>             | -2.128303  | -1.0897036 | 2.128303  | down | chr12:113596301-113623251 (-) // 88.08 // q24.13   |
| 220387_s_at  | <i>HHLA3</i>             | -2.1274233 | -1.089107  | 2.1274233 | down |                                                    |
| 1565784_at   | <i>LOC100128262</i>      | -2.125979  | -1.0881273 | 2.125979  | down | chr3:195638177-195640554 (+) // 51.89 // q29       |
| 205571_at    | <i>LIPT1</i>             | -2.1255326 | -1.0878245 | 2.1255326 | down | chr2:99771417-99779611 (+) // 90.95 // q11.2       |
| 201310_s_at  | <i>NREP</i>              | -2.1244538 | -1.0870919 | 2.1244538 | down | chr5:111064992-111092932 (-) // 97.25 // q22.1     |
| 228619_x_at  | <i>TIPRL</i>             | -2.1243775 | -1.0870402 | 2.1243775 | down | chr1:168170857-168171352 (+) // 82.3 // q24.2      |
| 218174_s_at  | <i>TMEM254</i>           | -2.124297  | -1.0869855 | 2.124297  | down | chr10:81838425-81852303 (+) // 99.8 // q22.3       |
| 222699_s_at  | <i>PLEKHF2</i>           | -2.123354  | -1.086345  | 2.123354  | down | chr8:96146051-96168912 (+) // 96.51 // q22.1       |
| 215749_s_at  | <i>GORASP1</i>           | -2.1219416 | -1.085385  | 2.1219416 | down | chr3:39138149-39149129 (-) // 99.97 // p22.2       |
| 1553990_at   | <i>BRICD5</i>            | -2.1219115 | -1.0853645 | 2.1219115 | down | chr16:2259253-2261317 (-) // 87.3 // p13.3         |
| 218788_s_at  | <i>SMYD3</i>             | -2.1217625 | -1.0852633 | 2.1217625 | down | chr1:245912644-246518399 (-) // 91.0 // q44        |
| 219023_at    | <i>AP1AR</i>             | -2.1213033 | -1.0849509 | 2.1213033 | down | chr4:113187743-113190822 (+) // 95.02 // q25       |
| 1552937_s_at | <i>ATRIP</i>             | -2.1209822 | -1.0847324 | 2.1209822 | down | chr3:48488217-48507054 (+) // 98.05 // p21.31      |
| 221090_s_at  | <i>OGFOD1</i>            | -2.1207697 | -1.0845879 | 2.1207697 | down | chr16:56485435-56511041 (+) // 74.91 // q12.2      |
| 200998_s_at  | <i>CKAP4</i>             | -2.1206923 | -1.0845352 | 2.1206923 | down | chr12:106631654-106641713 (-) // 90.75 // q23.3    |
| 218032_at    | <i>SNN</i>               | -2.1206362 | -1.0844972 | 2.1206362 | down | chr16:11769829-11773000 (+) // 96.05 // p13.13     |
| 222997_s_at  | <i>MRPS21</i>            | -2.1205502 | -1.0844386 | 2.1205502 | down | chr1:150266292-150280781 (+) // 94.23 // q21.2     |
| 224893_at    | <i>ATL3</i>              | -2.1200688 | -1.0841111 | 2.1200688 | down | chr11:63391554-63393525 (-) // 74.68 // q12.3      |
|              |                          |            |            |           |      | chr4:119437496-119475359 (+) // 89.97 //           |
| 1552717_s_at | <i>CEP170///CEP170P1</i> | -2.1185222 | -1.0830582 | 2.1185222 | down | q26///chr1:243289646-243326612 (-) // 88.88 // q43 |
| 222256_s_at  | <i>JMJD7///JMJD7-PLA</i> | -2.117665  | -1.0824745 | 2.117665  | down | chr15:42120310-42129778 (+) // 75.36 // q15.1      |
| 234471_s_at  | <i>NCOA5</i>             | -2.1175826 | -1.0824182 | 2.1175826 | down | chr20:44689635-44718552 (-) // 99.72 // q13.12     |

|              |                    |            |            |           |      |                                                        |
|--------------|--------------------|------------|------------|-----------|------|--------------------------------------------------------|
| 223732_at    | SLC23A1            | -2.1170433 | -1.0820507 | 2.1170433 | down | chr5:138703017-138718973 (-) // 91.61 // q31.2         |
| 201989_s_at  | CREBL2             | -2.11579   | -1.0811963 | 2.11579   | down | chr12:12764807-12798131 (+) // 95.96 // p13.2          |
| 228353_x_at  | UBASH3B            | -2.115575  | -1.0810499 | 2.115575  | down | chr11:122653759-122682704 (+) // 94.14 // q24.1        |
| 229045_at    | SNX20              | -2.1152081 | -1.0807996 | 2.1152081 | down | chr16:50707590-50715264 (-) // 99.07 // q12.1          |
| 203785_s_at  | DDX28              | -2.115105  | -1.0807292 | 2.115105  | down | chr16:68055208-68057345 (-) // 99.95 // q22.1          |
|              |                    |            |            |           |      | chr22:31672536-31673398 (+) // 83.99 //                |
|              |                    |            |            |           |      | q12.2///chr11:64011955-64014299 (-) // 85.78 //        |
| 212680_x_at  | PPP1R14B           | -2.1129215 | -1.0792391 | 2.1129215 | down | q13.1///chr4:140035813-140036660 (-) // 87.12 // q31.1 |
| 244688_at    |                    | -2.1122828 | -1.078803  | 2.1122828 | down | chr4:76869452-76870272 (-) // 82.14 // q21.1           |
| 219223_at    | CACFD1             | -2.1121569 | -1.078717  | 2.1121569 | down | chr9:136325130-136335885 (+) // 97.48 // q34.2         |
| 1555933_at   | KIAA2013           | -2.111922  | -1.0785565 | 2.111922  | down | chr1:11982231-11986485 (-) // 85.39 // p36.22          |
| 202846_s_at  | LOC100505991///PIC | -2.1113074 | -1.0781367 | 2.1113074 | down | chr1:172410597-172412055 (-) // 99.86 // q24.3         |
| 1555384_a_at | LARP4              | -2.1112866 | -1.0781225 | 2.1112866 | down | chr12:50794689-50869745 (+) // 98.48 // q13.12         |
| 211595_s_at  | MRPS11             | -2.111239  | -1.07809   | 2.111239  | down | chr15:89010683-89021495 (+) // 99.91 // q25.3          |
| 226090_x_at  | RABL3              | -2.109834  | -1.0771295 | 2.109834  | down | chr3:120406662-120449637 (-) // 82.66 // q13.33        |
| 203103_s_at  | PRPF19             | -2.1091661 | -1.0766728 | 2.1091661 | down | chr11:60658191-60674047 (-) // 99.26 // q12.2          |
| 213701_at    | C12orf29           | -2.1091025 | -1.0766293 | 2.1091025 | down | chr12:88442314-88443936 (+) // 91.97 // q21.32         |
| 209932_s_at  | DUT                | -2.1081736 | -1.0759937 | 2.1081736 | down | chr15:48623650-48634416 (+) // 96.04 // q21.1          |
| 215807_s_at  | PLXNB1             | -2.10802   | -1.0758886 | 2.10802   | down | chr3:48445693-48466020 (-) // 99.63 // p21.31          |
| 234809_at    | ZC4H2              | -2.1077738 | -1.0757201 | 2.1077738 | down | chrX:64136367-64196413 (+) // 74.03 // q11.2           |
| 212580_at    | CAST               | -2.107076  | -1.0752423 | 2.107076  | down | chr5:96108879-96116208 (+) // 83.11 // q15             |
| 236356_at    | NDUFS1             | -2.1068897 | -1.0751148 | 2.1068897 | down | chr2:206987802-206988293 (-) // 79.31 // q33.3         |
| 225461_at    | EHMT1              | -2.1068795 | -1.0751078 | 2.1068795 | down | chr9:140694894-140730579 (+) // 97.69 // q34.3         |
| 224281_s_at  | NGRN               | -2.1065545 | -1.0748852 | 2.1065545 | down | chr15:90809001-90815443 (+) // 97.27 // q26.1          |
| 226590_at    | ZNF618             | -2.1057372 | -1.0743254 | 2.1057372 | down | chr9:116817542-116818875 (+) // 94.6 // q32            |
| 239161_at    | FDX1               | -2.1056123 | -1.0742397 | 2.1056123 | down | chr11:110335168-110335608 (+) // 56.01 // q22.3        |
| 231553_s_at  | MICAL3             | -2.1055071 | -1.0741677 | 2.1055071 | down | chr22:18270421-18270961 (+) // 99.82 // q11.21         |
| 204267_x_at  | PKMYT1             | -2.1049845 | -1.0738096 | 2.1049845 | down | chr16:3022793-3029850 (-) // 98.46 // p13.3            |
| 203433_at    | MTHFS///ST20-MTH.  | -2.1046314 | -1.0735676 | 2.1046314 | down | chr15:80137319-80189343 (-) // 99.88 // q25.1          |
| 219031_s_at  | NIP7               | -2.1046085 | -1.0735519 | 2.1046085 | down | chr16:69373699-69376335 (+) // 83.49 // q22.1          |
| 242655_at    | BARD1              | -2.1042497 | -1.073306  | 2.1042497 | down | chr2:215590369-215590942 (-) // 85.94 // q35           |
| 227063_at    | TMEM256            | -2.103722  | -1.0729442 | 2.103722  | down | chr17:7306293-7307421 (-) // 95.15 // p13.1            |
| 35156_at     | R3HCC1             | -2.1029396 | -1.0724075 | 2.1029396 | down | chr8:23146017-23153791 (+) // 85.98 // p21.3           |
| 227267_at    | POC5               | -2.1027648 | -1.0722876 | 2.1027648 | down | chr5:74970032-74984926 (-) // 91.88 // q13.3           |
| 219490_s_at  | DCLRE1B            | -2.1017869 | -1.0716164 | 2.1017869 | down | chr1:114447996-114455095 (+) // 98.18 // p13.2         |
| 200896_x_at  | HDGF               | -2.1010425 | -1.0711054 | 2.1010425 | down | chr1:156711901-156721536 (-) // 90.61 // q23.1         |

|              |                    |                  |            |           |      |                                                       |
|--------------|--------------------|------------------|------------|-----------|------|-------------------------------------------------------|
| 235136_at    | ORMDL3             | -2.1008794       | -1.0709933 | 2.1008794 | down | chr17:38077933-38079517 (-) // 98.79 // q12           |
| 203228_at    | PAFAH1B3           | -2.0998325       | -1.0702742 | 2.0998325 | down | chr19:42801186-42806574 (-) // 100.0 // q13.2         |
| 225570_at    | SLC41A1            | -2.0995498       | -1.0700799 | 2.0995498 | down | chr1:205758222-205767150 (-) // 91.34 // q32.1        |
| 229194_at    | PCGF5              | -2.0992236       | -1.0698558 | 2.0992236 | down | chr10:93040172-93040736 (+) // 94.71 // q23.32        |
| 208657_s_at  |                    | 9.Sep -2.0986753 | -1.069479  | 2.0986753 | down | chr17:75316148-75496674 (+) // 98.37 // q25.3         |
| 203753_at    | TCF4               | -2.0976994       | -1.068808  | 2.0976994 | down | chr18:52894968-53255443 (-) // 95.24 // q21.2         |
| 238494_at    | TRAF3IP1           | -2.0976312       | -1.068761  | 2.0976312 | down | chr2:239308290-239309541 (+) // 81.3 // q37.3         |
| 223312_at    | PRADC1             | -2.097496        | -1.0686681 | 2.097496  | down | chr2:73455135-73460356 (-) // 95.57 // p13.2          |
| 201400_at    | PSMB3              | -2.0968723       | -1.0682391 | 2.0968723 | down | chr17:36909062-36920477 (+) // 99.86 // q12           |
| 203008_x_at  | TXNDC9             | -2.0966601       | -1.0680931 | 2.0966601 | down | chr2:99935521-99952798 (-) // 97.77 // q11.2          |
| 1565817_at   | IKZF1              | -2.094157        | -1.0663695 | 2.094157  | down | chr7:50348325-50444492 (+) // 92.72 // p12.2          |
| 1561759_at   | LOC645513          | -2.0931792       | -1.0656959 | 2.0931792 | down | chr4:120433527-120473178 (+) // 59.22 // q26          |
| 201823_s_at  | RNF14              | -2.092651        | -1.0653317 | 2.092651  | down | chr5:141346436-141367592 (+) // 100.0 // q31.3        |
| 1555460_a_at | SLC39A6            | -2.0921357       | -1.0649763 | 2.0921357 | down | chr18:33690962-33709348 (-) // 94.2 // q12.2          |
| 210756_s_at  | NOTCH2             | -2.0913243       | -1.0644169 | 2.0913243 | down | chr1:120455704-120612020 (-) // 99.14 // p12          |
| 210385_s_at  | ERAP1              | -2.0901783       | -1.063626  | 2.0901783 | down | chr5:96111827-96143607 (-) // 99.37 // q15            |
| 207540_s_at  | SYK                | -2.0892034       | -1.062953  | 2.0892034 | down | chr9:93564068-93658425 (+) // 99.57 // q22.2          |
|              |                    |                  |            |           |      | chr17:60501254-60527454 (+) // 71.38 //               |
|              |                    |                  |            |           |      | q23.2///chr7:128116810-128143333 (+) // 71.7 // q32.1 |
| 225253_s_at  | METTL2A///METTL2   | -2.0884488       | -1.0624318 | 2.0884488 | down | chr11:111933370-111935112 (+) // 99.6 // q23.1        |
| 213149_at    | DLAT               | -2.088369        | -1.0623766 | 2.088369  | down | chr4:78079449-78087216 (+) // 100.0 // q21.1          |
| 211559_s_at  | CCNG2              | -2.0879097       | -1.0620593 | 2.0879097 | down | chr1:114307053-114354911 (-) // 98.18 // p13.2        |
| 222790_s_at  | RSBN1              | -2.0875504       | -1.0618111 | 2.0875504 | down | chr18:74724748-74728144 (-) // 96.83 // q23           |
| 225407_at    | MBP                | -2.0870876       | -1.0614913 | 2.0870876 | down | chr4:120218423-120221838 (-) // 58.1 // q26           |
| 224602_at    | C4orf3             | -2.0862799       | -1.0609328 | 2.0862799 | down | chr1:220141941-220219872 (-) // 98.14 // q41          |
| 200841_s_at  | EPRS               | -2.0862262       | -1.0608956 | 2.0862262 | down | chr3:150459184-150481164 (-) // 96.07 // q25.1        |
| 209339_at    | SIAH2              | -2.0851674       | -1.0601633 | 2.0851674 | down | chr16:82181771-82203812 (-) // 97.63 // q23.3         |
| 203740_at    | MPHOSPH6           | -2.084705        | -1.0598433 | 2.084705  | down | chr5:77656405-77771818 (+) // 96.94 // q14.1          |
| 1552978_a_at | SCAMP1             | -2.0836692       | -1.0591263 | 2.0836692 | down | chr15:90773477-90777160 (-) // 94.59 // q26.1         |
| 201953_at    | CIB1               | -2.081939        | -1.0579277 | 2.081939  | down | chr2:136289070-136482836 (+) // 97.96 // q21.3        |
| 202754_at    | R3HDM1             | -2.081371        | -1.0575342 | 2.081371  | down | chr1:180942163-180945247 (-) // 95.57 // q25.3        |
| 212799_at    | STX6               | -2.0807412       | -1.0570974 | 2.0807412 | down | chr4:183811256-183838463 (-) // 86.79 // q35.1        |
| 201571_s_at  | DCTD               | -2.0806868       | -1.0570598 | 2.0806868 | down | chr15:44084515-44086244 (+) // 96.6 // q15.3          |
| 217756_x_at  | HYPK///MIR1282///S | -2.079552        | -1.0562727 | 2.079552  | down | chr2:106709762-106810784 (-) // 95.14 // q12.2        |
| 225583_at    | UXS1               | -2.0793056       | -1.0561019 | 2.0793056 | down | chrX:128913919-128929174 (+) // 93.5 // q26.1         |
| 204923_at    | SASH3              | -2.078551        | -1.0555782 | 2.078551  | down | chr14:96010472-96011051 (+) // 73.1 // q32.13         |
| 221932_s_at  | GLRX5              | -2.0782561       | -1.0553735 | 2.0782561 | down |                                                       |

|              |                 |            |            |           |      |                                                    |
|--------------|-----------------|------------|------------|-----------|------|----------------------------------------------------|
| 202263_at    | CYB5R1          | -2.0771437 | -1.0546011 | 2.0771437 | down | chr1:202931003-202936356 (-) // 98.88 // q32.1     |
| 52285_f_at   | CEP76           | -2.0769403 | -1.0544598 | 2.0769403 | down | chr18:12672882-12673449 (-) // 95.94 // p11.21     |
| 200603_at    | PRKAR1A         | -2.076278  | -1.0539997 | 2.076278  | down | chr17:66508579-66529568 (+) // 97.56 // q24.2      |
| 212356_at    | KHNYN           | -2.073903  | -1.0523485 | 2.073903  | down | chr14:24898491-24910545 (+) // 89.12 // q12        |
| 212800_at    | STX6            | -2.0731838 | -1.051848  | 2.0731838 | down | chr1:180942163-180945247 (-) // 95.57 // q25.3     |
| 226326_at    | PCGF5           | -2.073152  | -1.0518259 | 2.073152  | down | chr10:93042790-93044086 (+) // 93.81 // q23.32     |
| 225820_at    | PHF17           | -2.0729537 | -1.051688  | 2.0729537 | down | chr4:129794402-129796379 (+) // 92.23 // q28.2     |
| 235363_at    |                 | -2.0720754 | -1.0510764 | 2.0720754 | down | chr19:23397791-23399353 (-) // 73.41 // p12        |
| 1559103_s_at | OTTHUMG00000176 | -2.0713003 | -1.0505366 | 2.0713003 | down | chr4:113150716-113153052 (-) // 59.08 // q25       |
| 213461_at    | NUDT21          | -2.070826  | -1.0502064 | 2.070826  | down | chr16:56465179-56466544 (-) // 97.96 // q12.2      |
| 225368_at    | HIPK2           | -2.0705318 | -1.0500014 | 2.0705318 | down | chr7:139246315-139257613 (-) // 97.56 // q34       |
| 211922_s_at  | CAT             | -2.0698843 | -1.0495502 | 2.0698843 | down | chr11:34460560-34492980 (+) // 95.33 // p13        |
| 207724_s_at  | SPAST           | -2.0693145 | -1.049153  | 2.0693145 | down | chr2:32288775-32380852 (+) // 98.74 // p22.3       |
| 203061_s_at  | MDC1            | -2.0689774 | -1.0489179 | 2.0689774 | down | chr6:30667588-30682957 (-) // 97.16 // p21.33      |
| 202266_at    | TDP2            | -2.0685751 | -1.0486374 | 2.0685751 | down | chr6:24650205-24667107 (-) // 98.66 // p22.3       |
| 224330_s_at  | MRPL27          | -2.0679142 | -1.0481763 | 2.0679142 | down | chr17:48445251-48450537 (-) // 100.0 // q21.33     |
| 1558942_at   | ZNF765          | -2.0677824 | -1.0480844 | 2.0677824 | down |                                                    |
| 1559052_s_at | PAK2            | -2.0677476 | -1.04806   | 2.0677476 | down | chr3:196509577-196555613 (+) // 100.0 //           |
| 222118_at    | CENPN           | -2.0671647 | -1.0476533 | 2.0671647 | down | q29//chr15:21936222-21938066 (-) // 96.44 // q11.2 |
| 204279_at    | PSMB9           | -2.066747  | -1.0473617 | 2.066747  | down | chr16:81040102-81062942 (+) // 92.23 // q23.2      |
| 225974_at    | TMEM64          | -2.0662332 | -1.047003  | 2.0662332 | down | chr6:32821961-32827327 (+) // 99.86 // p21.32      |
| 55065_at     | MARK4           | -2.0654075 | -1.0464265 | 2.0654075 | down | chr8:91634227-91637416 (-) // 98.01 // q21.3       |
| 203303_at    | DYNLT3          | -2.065326  | -1.0463696 | 2.065326  | down | chr19:45806111-45806941 (+) // 89.23 // q13.32     |
| 221615_at    | BMP8B           | -2.0650005 | -1.0461421 | 2.0650005 | down | chrX:37698088-37706831 (-) // 96.66 // p11.4       |
| 1559102_at   | OTTHUMG00000176 | -2.0645976 | -1.0458606 | 2.0645976 | down | chr1:40204643-40229583 (-) // 90.43 // p34.2       |
| 218929_at    | CDKN2AIP        | -2.0642025 | -1.0455846 | 2.0642025 | down | chr4:113150716-113153052 (-) // 59.08 // q25       |
| 219953_s_at  | AKIP1           | -2.0628884 | -1.0446657 | 2.0628884 | down | chr4:184365788-184369049 (+) // 99.21 // q35.1     |
| 1556725_a_at | LOC100288490    | -2.0624707 | -1.0443736 | 2.0624707 | down | chr11:8932686-8941100 (+) // 99.75 // p15.4        |
| 222403_at    | MTCH2           | -2.0621693 | -1.0441628 | 2.0621693 | down | chr19:58520197-58522600 (+) // 51.96 // q13.43     |
| 203738_at    | C5orf22         | -2.0610948 | -1.0434109 | 2.0610948 | down | chr11:47638868-47664211 (-) // 90.74 // p11.2      |
| 222597_at    | SNAP29          | -2.0582907 | -1.0414467 | 2.0582907 | down | chr5:31532398-31555164 (+) // 89.48 // p13.3       |
| 235113_at    | LRR1            | -2.0579062 | -1.0411772 | 2.0579062 | down | chr22:21213324-21244559 (+) // 98.21 // q11.21     |
| 217759_at    | TRIM44          | -2.0578828 | -1.0411608 | 2.0578828 | down | chr14:50064849-50081389 (+) // 93.02 // q21.3      |
| 226807_at    | ZFP1            | -2.0575542 | -1.0409305 | 2.0575542 | down | chr11:35684350-35832602 (+) // 89.61 // p13        |
| 204535_s_at  | REST            | -2.057393  | -1.0408175 | 2.057393  | down | chr16:75203859-75206130 (+) // 80.56 // q23.1      |
|              |                 |            |            |           |      | chr4:57774074-57800857 (+) // 90.38 // q12         |

|             |                 |            |            |           |      |                                                 |
|-------------|-----------------|------------|------------|-----------|------|-------------------------------------------------|
| 200972_at   | TSPAN3          | -2.0566952 | -1.040328  | 2.0566952 | down | chr15:77338371-77363475 (-) // 98.36 // q24.3   |
| 211758_x_at | TXNDC9          | -2.056542  | -1.0402205 | 2.056542  | down | chr2:99935490-99952796 (-) // 93.9 // q11.2     |
| 216640_s_at | PDIA6           | -2.0563748 | -1.0401032 | 2.0563748 | down | chr2:10924118-10952873 (-) // 73.66 // p25.1    |
| 221532_s_at | WDR61           | -2.0555537 | -1.039527  | 2.0555537 | down | chr15:78575750-78588068 (-) // 98.99 // q25.1   |
| 209218_at   | SQLE            | -2.0544689 | -1.0387655 | 2.0544689 | down | chr8:126011490-126034506 (+) // 99.91 // q24.13 |
| 213863_s_at | OAZ3            | -2.0542138 | -1.0385863 | 2.0542138 | down | chr1:151733927-151735841 (+) // 100.0 // q21.3  |
| 212098_at   | MGAT5           | -2.0539427 | -1.0383959 | 2.0539427 | down | chr2:135208462-135212192 (+) // 91.61 // q21.3  |
| 243752_s_at | CYTH3           | -2.0519862 | -1.037021  | 2.0519862 | down | chr7:6210454-6210936 (-) // 99.17 // p22.1      |
| 229697_at   | HIRIP3          | -2.0516696 | -1.0367985 | 2.0516696 | down | chr16:29592814-30004393 (-) // 70.65 // p11.2   |
| 240088_at   | PDE5A           | -2.0506165 | -1.0360577 | 2.0506165 | down | chr4:120421702-120422393 (-) // 83.17 // q26    |
| 227239_at   | FAM126A         | -2.0497806 | -1.0354695 | 2.0497806 | down | chr7:22980879-22982628 (-) // 98.92 // p15.3    |
| 240212_at   | OTTHUMG00000160 | -2.0496712 | -1.0353924 | 2.0496712 | down | chr4:174088894-174089318 (-) // 98.15 // q34.1  |
| 210130_s_at | TM7SF2          | -2.049544  | -1.035303  | 2.049544  | down | chr11:64879361-64883698 (+) // 99.79 // q13.1   |
| 210216_x_at | RAD1            | -2.0490777 | -1.0349747 | 2.0490777 | down | chr5:34908659-34915647 (-) // 97.53 // p13.2    |
| 200978_at   | MDH1            | -2.048838  | -1.0348058 | 2.048838  | down | chr2:63816122-63834328 (+) // 100.0 // p15      |
| 219077_s_at | WWOX            | -2.0485466 | -1.0346006 | 2.0485466 | down | chr16:78133550-79246563 (+) // 98.94 // q23.1   |
| 218471_s_at | BBS1            | -2.0477738 | -1.0340563 | 2.0477738 | down | chr11:66294230-66301068 (+) // 88.08 // q13.2   |
| 213709_at   | BHLHB9          | -2.0473013 | -1.0337235 | 2.0473013 | down | chrX:101975691-102007849 (+) // 73.2 // q22.1   |
| 221879_at   | CALML4          | -2.0462487 | -1.0329815 | 2.0462487 | down | chr15:68486139-68498498 (-) // 86.83 // q23     |
| 242414_at   | QPRT            | -2.046035  | -1.0328308 | 2.046035  | down | chr16:29709255-29710020 (+) // 28.84 // p11.2   |
| 230984_s_at |                 | -2.0444624 | -1.0317216 | 2.0444624 | down | chr5:134240924-134241379 (-) // 99.56 // q31.1  |
| 231313_at   | FLJ27354        | -2.0430162 | -1.0307007 | 2.0430162 | down | chr1:90097175-90098319 (-) // 99.86 // p22.2    |
| 238794_at   | SFR1            | -2.0426733 | -1.0304586 | 2.0426733 | down | chr10:105881815-105885649 (+) // 84.78 // q25.1 |
| 210715_s_at | SPINT2          | -2.0418706 | -1.0298914 | 2.0418706 | down | chr19:38755293-38783088 (+) // 91.43 // q13.2   |
| 212277_at   | MTMR4           | -2.0402727 | -1.028762  | 2.0402727 | down | chr17:56566897-56593980 (-) // 96.48 // q22     |
| 230421_at   | ZNF879          | -2.03978   | -1.0284135 | 2.03978   | down | chr5:178460456-178461388 (+) // 99.57 // q35.3  |
| 225601_at   | HMGB3           | -2.0380058 | -1.0271581 | 2.0380058 | down | chrX:150157790-150159244 (+) // 96.36 // q28    |
| 217815_at   | SUPT16H         | -2.0358226 | -1.0256119 | 2.0358226 | down | chr14:21819637-21852143 (-) // 93.46 // q11.2   |
| 223367_at   | DNAJC30         | -2.0356317 | -1.0254766 | 2.0356317 | down | chr7:73096603-73097772 (-) // 97.58 // q11.23   |
| 202236_s_at | SLC16A1         | -2.0346131 | -1.0247545 | 2.0346131 | down | chr1:113455449-113471942 (-) // 99.92 // p13.2  |
| 202613_at   | CTPS1           | -2.034607  | -1.0247501 | 2.034607  | down | chr1:41445442-41478228 (+) // 98.15 // p34.2    |
| 225580_at   | MRPL50          | -2.0345862 | -1.0247355 | 2.0345862 | down | chr9:104152251-104160947 (-) // 91.11 // q31.1  |
| 200983_x_at | CD59            | -2.0339005 | -1.0242491 | 2.0339005 | down | chr11:33730138-33758025 (-) // 97.55 // p13     |
| 238841_at   | PTPDC1          | -2.033755  | -1.024146  | 2.033755  | down | chr9:96860777-96870438 (+) // 91.02 // q22.32   |
| 238761_at   | ELK4            | -2.0336955 | -1.0241036 | 2.0336955 | down | chr1:205582157-205582613 (-) // 71.28 // q32.1  |
| 217218_at   | WAPAL           | -2.0330791 | -1.0236664 | 2.0330791 | down | chr10:88196766-88230820 (+) // 88.89 // q23.2   |

|             |                          |            |            |           |      |                                                 |
|-------------|--------------------------|------------|------------|-----------|------|-------------------------------------------------|
| 235005_at   | <i>DIS3L</i>             | -2.0329764 | -1.0235934 | 2.0329764 | down | chr15:66612974-66626066 (+) // 87.34 // q22.31  |
| 227107_at   |                          | -2.0312278 | -1.0223521 | 2.0312278 | down | chr11:93918015-93918757 (+) // 96.36 // q21     |
| 238506_at   | <i>LRRC58</i>            | -2.0309303 | -1.0221407 | 2.0309303 | down | chr3:120048485-120049772 (-) // 73.9 // q13.33  |
| 55081_at    | <i>MICALL1</i>           | -2.030513  | -1.0218443 | 2.030513  | down | chr22:38336937-38338016 (+) // 95.9 // q13.1    |
| 212544_at   | <i>ZNHIT3</i>            | -2.0301838 | -1.0216103 | 2.0301838 | down | chr17:34842505-34851761 (+) // 99.12 // q12     |
| 203515_s_at | <i>PMVK</i>              | -2.030137  | -1.0215771 | 2.030137  | down | chr1:154897216-154909178 (-) // 98.2 // q21.3   |
| 223273_at   | <i>C14orf142</i>         | -2.0298307 | -1.0213593 | 2.0298307 | down | chr14:93669581-93673204 (-) // 95.18 // q32.12  |
| 214177_s_at | <i>PBXIP1</i>            | -2.029327  | -1.0210012 | 2.029327  | down | chr1:154916552-154917014 (-) // 64.79 // q21.3  |
| 225052_at   | <i>TMEM203</i>           | -2.0292697 | -1.0209606 | 2.0292697 | down | chr9:140098533-140100098 (-) // 92.51 // q34.3  |
| 221255_s_at | <i>EMC6</i>              | -2.029246  | -1.0209438 | 2.029246  | down | chr17:3572108-3572958 (+) // 96.88 // p13.2     |
| 235971_at   |                          | -2.028233  | -1.0202234 | 2.028233  | down | chr4:113195694-113196576 (-) // 78.78 // q25    |
| 219366_at   | <i>AVEN</i>              | -2.027139  | -1.019445  | 2.027139  | down | chr15:34158427-34331303 (-) // 95.93 // q14     |
| 203465_at   | <i>MRPL19</i>            | -2.0263731 | -1.0188998 | 2.0263731 | down | chr2:75873935-75882856 (+) // 81.24 // p12      |
| 203359_s_at | <i>GJA9-MYCBP///MYC</i>  | -2.0260732 | -1.0186863 | 2.0260732 | down | chr1:39328636-39339028 (-) // 86.27 // p34.3    |
| 216194_s_at | <i>TBCB</i>              | -2.025799  | -1.018491  | 2.025799  | down | chr19:36606706-36616684 (+) // 99.09 // q13.12  |
| 217848_s_at | <i>PPA1</i>              | -2.0251048 | -1.0179965 | 2.0251048 | down | chr10:71962593-71993160 (-) // 98.6 // q22.1    |
| 212866_at   | <i>R3HCC1</i>            | -2.0250578 | -1.017963  | 2.0250578 | down | chr8:23145622-23153792 (+) // 92.01 // p21.3    |
| 204771_s_at | <i>TTF1</i>              | -2.0246522 | -1.0176741 | 2.0246522 | down | chr9:135251371-135278216 (-) // 93.09 // q34.13 |
| 204026_s_at | <i>ZWINT</i>             | -2.0242033 | -1.0173542 | 2.0242033 | down | chr10:58117206-58121013 (-) // 83.72 // q21.1   |
| 222791_at   | <i>RSBN1</i>             | -2.0240073 | -1.0172145 | 2.0240073 | down | chr1:114307053-114354911 (-) // 98.18 // p13.2  |
| 230411_at   | <i>UBE2V2</i>            | -2.0235615 | -1.0168967 | 2.0235615 | down | chr8:48975306-48976099 (+) // 97.14 // q11.21   |
| 230185_at   | <i>THAP9</i>             | -2.0228598 | -1.0163964 | 2.0228598 | down | chr4:83840650-83841429 (+) // 98.98 // q21.22   |
| 202272_s_at | <i>FBXO28</i>            | -2.0212247 | -1.0152298 | 2.0212247 | down | chr1:224301812-224347246 (+) // 99.9 // q42.11  |
| 219095_at   | <i>JMJD7///JMJD7-PLA</i> | -2.0208223 | -1.0149425 | 2.0208223 | down | chr15:42120313-42140338 (+) // 99.22 // q15.1   |
| 212934_at   | <i>UBXN2B</i>            | -2.0205846 | -1.0147728 | 2.0205846 | down | chr8:59362760-59364104 (+) // 44.62 // q12.1    |
| 207304_at   | <i>ZNF45</i>             | -2.020207  | -1.014503  | 2.020207  | down | chr19:44417280-44426436 (-) // 99.75 // q13.31  |
| 229146_at   | <i>C7orf31</i>           | -2.0197396 | -1.0141693 | 2.0197396 | down | chr7:25175355-25200881 (-) // 97.92 // p15.3    |
| 227590_at   | <i>CDPF1</i>             | -2.018482  | -1.0132706 | 2.018482  | down | chr22:46639910-46641045 (-) // 95.12 // q13.31  |
| 208696_at   | <i>CCT5</i>              | -2.0177917 | -1.0127772 | 2.0177917 | down | chr5:10261665-10265121 (+) // 95.04 // p15.2    |
| 35820_at    | <i>GM2A</i>              | -2.0174916 | -1.0125626 | 2.0174916 | down | chr5:150632687-150648804 (+) // 69.78 // q33.1  |
| 210967_x_at | <i>CACNB1</i>            | -2.0172787 | -1.0124104 | 2.0172787 | down | chr17:37333389-37353901 (-) // 98.41 // q12     |
| 202678_at   | <i>GTF2A2</i>            | -2.0172722 | -1.0124058 | 2.0172722 | down | chr15:59931065-59949693 (-) // 99.59 // q22.2   |
| 222693_at   | <i>FNDC3B</i>            | -2.0161984 | -1.0116377 | 2.0161984 | down | chr3:172052787-172116573 (+) // 92.02 // q26.31 |
| 221279_at   | <i>GDAP1</i>             | -2.015953  | -1.011462  | 2.015953  | down | chr8:75262696-75276602 (+) // 98.52 // q21.11   |
| 210183_x_at | <i>PNN</i>               | -2.0153437 | -1.0110259 | 2.0153437 | down | chr14:39644416-39651427 (+) // 70.24 // q21.1   |
| 202868_s_at | <i>POP4</i>              | -2.014865  | -1.0106831 | 2.014865  | down | chr19:30097200-30106706 (+) // 68.93 // q12     |

|              |                            |            |            |           |      |                                                      |
|--------------|----------------------------|------------|------------|-----------|------|------------------------------------------------------|
| 206370_at    | <i>PIK3CG</i>              | -2.0145519 | -1.010459  | 2.0145519 | down | chr7:106505923-106547590 (+) // 92.14 // q22.3       |
| 202783_at    | <i>NNT</i>                 | -2.0142772 | -1.0102623 | 2.0142772 | down | chr5:43603306-43705334 (+) // 99.6 // p12            |
| 1564520_s_at | <i>PRMT5</i>               | -2.0141206 | -1.0101501 | 2.0141206 | down | chr14:23389732-23398585 (-) // 78.88 // q11.2        |
| 202399_s_at  | <i>AP3S2///C15orf38-AI</i> | -2.0137122 | -1.0098574 | 2.0137122 | down | chr15:90377529-90437211 (-) // 82.89 // q26.1        |
| 205687_at    | <i>UBFD1</i>               | -2.0134468 | -1.0096674 | 2.0134468 | down | chr16:23568391-23582268 (+) // 98.16 // p12.2        |
| 212737_at    | <i>GM2A</i>                | -2.0133622 | -1.0096067 | 2.0133622 | down | chr5:150647740-150649522 (+) // 42.79 // q33.1       |
| 213130_at    | <i>ZNF473</i>              | -2.0128608 | -1.0092473 | 2.0128608 | down | chr19:50529211-50552029 (+) // 94.36 // q13.33       |
| 216548_x_at  | <i>HMGB3P1</i>             | -2.0126326 | -1.0090839 | 2.0126326 | down | chr20:33421377-33422265 (-) // 90.22 // q11.22       |
| 208669_s_at  | <i>EID1</i>                | -2.0120196 | -1.0086443 | 2.0120196 | down | chr15:49170310-49171695 (+) // 100.0 // q21.1        |
| 224643_at    | <i>PRRC1</i>               | -2.011793  | -1.0084817 | 2.011793  | down | chr5:126853344-126890774 (+) // 94.6 // q23.2        |
| 201727_s_at  | <i>ELAVL1</i>              | -2.0114057 | -1.0082041 | 2.0114057 | down | chr19:8028234-8056718 (-) // 91.79 // p13.2          |
| 238687_x_at  | <i>ZNF770</i>              | -2.0099044 | -1.0071269 | 2.0099044 | down | chr15:35274170-35274913 (-) // 97.37 // q14          |
| 214684_at    | <i>MEF2A</i>               | -2.0093708 | -1.0067438 | 2.0093708 | down | chr15:100106222-100254634 (+) // 96.17 // q26.3      |
| 210022_at    | <i>PCGF1</i>               | -2.00901   | -1.0064847 | 2.00901   | down | chr2:74732170-74734786 (-) // 96.24 // p13.1         |
| 221311_x_at  | <i>LYRM2</i>               | -2.0078228 | -1.0056319 | 2.0078228 | down | chr6:90346991-90348435 (-) // 100.0 // q15           |
| 223277_at    | <i>ELP6</i>                | -2.006927  | -1.0049882 | 2.006927  | down | chr3:47537130-47555104 (-) // 97.28 // p21.31        |
| 204234_s_at  | <i>ZNF195</i>              | -2.0066478 | -1.0047874 | 2.0066478 | down | chr11:3379615-3400345 (-) // 91.03 // p15.4          |
|              |                            |            |            |           |      | chr11:74660332-74688779 (+) // 100.0 //              |
| 201240_s_at  | <i>SPCS2</i>               | -2.0064108 | -1.004617  | 2.0064108 | down | q13.4///chr1:28421560-28422931 (-) // 99.64 // p35.3 |
| 220719_at    | <i>OTTHUMG00000168</i>     | -2.005849  | -1.0042129 | 2.005849  | down | chr12:123571801-123577047 (-) // 56.88 // q24.31     |
| 1557984_s_at | <i>RPAP3</i>               | -2.0055099 | -1.0039691 | 2.0055099 | down | chr12:48082915-48096632 (-) // 80.77 // q13.11       |
| 201877_s_at  | <i>PPP2R5C</i>             | -2.0040941 | -1.0029502 | 2.0040941 | down | chr14:102276231-102394023 (+) // 98.5 // q32.31      |
| 201695_s_at  | <i>PNP</i>                 | -2.0038793 | -1.0027956 | 2.0038793 | down | chr14:20937564-20945199 (+) // 97.11 // q11.2        |
| 226878_at    | <i>HLA-DOA</i>             | -2.0035846 | -1.0025834 | 2.0035846 | down | chr6:32971958-32972876 (-) // 96.02 // p21.32        |
| 224593_at    | <i>ZNF664</i>              | -2.0033891 | -1.0024426 | 2.0033891 | down | chr12:124458478-124499973 (+) // 84.38 // q24.31     |
| 229864_at    | <i>ELP6</i>                | -2.003141  | -1.0022639 | 2.003141  | down | chr3:47542928-47555153 (-) // 95.96 // p21.31        |
| 221542_s_at  | <i>ERLIN2</i>              | -2.0027835 | -1.0020065 | 2.0027835 | down | chr8:37594109-37615318 (+) // 82.54 // p11.23        |
| 201339_s_at  | <i>SCP2</i>                | -2.0006943 | -1.0005007 | 2.0006943 | down | chr1:53443924-53516921 (+) // 98.13 // p32.3         |
| 218734_at    | <i>NAA40</i>               | -2.0006235 | -1.0004497 | 2.0006235 | down | chr11:63706467-63724444 (+) // 89.68 // q13.1        |
| 235411_at    | <i>PGBD1</i>               | -2.000469  | -1.0003383 | 2.000469  | down | chr6:28268542-28269588 (+) // 99.33 // p22.1         |

**Supplementary Table 7.** Gene set enrichment analysis between *TCF3-ZNF384*- and *TCF3-PBX1*-positive ALL using the gene set enriched in hematopoietic stages and human immunologic signatures.

A) GSEA against curated gene sets of hematopoietic precursors (*TCF3-ZNF384* vs *TCF3-PBX1*)

GSEA report for *TCF3-ZNF384*

| NAME | GS<br> follow link to MSigDB | GS DETAILS  | SIZE | ES         | NES        | NOM p-val   | FDR q-val  | FWER p-val | RANK AT MAX | LEADING EDGE                   |
|------|------------------------------|-------------|------|------------|------------|-------------|------------|------------|-------------|--------------------------------|
| HSC  | HSC                          | Details ... | 491  | 0.35766906 | 1.3267897  | 0.0955414   | 0.14292128 | 0.255      | 3080        | tags=23%, list=15%, signal=26% |
| MLP  | MLP                          | Details ... | 455  | 0.38591242 | 1.335328   | 0.067510545 | 0.27073118 | 0.245      | 3526        | tags=30%, list=17%, signal=35% |
| GMP  | GMP                          | Details ... | 490  | 0.29774183 | 0.96740115 | 0.5083682   | 0.43153784 | 0.638      | 4077        | tags=24%, list=20%, signal=29% |

GSEA report for *TCF3-PBX1*

| NAME | GS<br> follow link to MSigDB | GS DETAILS  | SIZE | ES          | NES         | NOM p-val   | FDR q-val  | FWER p-val | RANK AT MAX | LEADING EDGE                   |
|------|------------------------------|-------------|------|-------------|-------------|-------------|------------|------------|-------------|--------------------------------|
| ETP  | ETP                          | Details ... | 478  | -0.47034124 | -1.5262432  | 0.037549406 | 0.07928071 | 0.08       | 3841        | tags=45%, list=19%, signal=55% |
| PROB | PROB                         | Details ... | 484  | -0.37953287 | -1.3723917  | 0.034548946 | 0.14625852 | 0.233      | 2147        | tags=24%, list=10%, signal=26% |
| CMP  | CMP                          | Details ... | 499  | -0.24760553 | -0.873019   | 0.6238361   | 0.7647596  | 0.75       | 2290        | tags=16%, list=11%, signal=18% |
| MEP  | MEP                          | Details ... | 291  | -0.1913968  | -0.57582325 | 0.93345654  | 0.9665186  | 0.896      | 3005        | tags=19%, list=15%, signal=21% |

B) GSEA against curated gene sets of hematopoietic precursors (*TCF3-ZNF384* vs *ZNF384* wild-type)

GSEA report for *TCF3-ZNF384*

| NAME | GS<br> follow link to MSigDB | GS DETAILS  | SIZE | ES         | NES       | NOM p-val   | FDR q-val  | FWER p-val | RANK AT MAX | LEADING EDGE                   |
|------|------------------------------|-------------|------|------------|-----------|-------------|------------|------------|-------------|--------------------------------|
| MLP  | MLP                          | Details ... | 353  | 0.40728587 | 1.3520926 | 0.043572985 | 0.18947965 | 0.187      | 5139        | tags=38%, list=25%, signal=49% |
| HSC  | HSC                          | Details ... | 383  | 0.2827354  | 0.9437805 | 0.5208333   | 0.69239295 | 0.649      | 4386        | tags=24%, list=21%, signal=30% |
| GMP  | GMP                          | Details ... | 392  | 0.20267238 | 0.6456866 | 0.9258475   | 0.9565635  | 0.877      | 5398        | tags=25%, list=26%, signal=33% |

GSEA report for *ZNF384* wild-type

| NAME | GS<br> follow link to MSigDB | GS DETAILS  | SIZE | ES          | NES        | NOM p-val  | FDR q-val   | FWER p-val | RANK AT MAX | LEADING EDGE                   |
|------|------------------------------|-------------|------|-------------|------------|------------|-------------|------------|-------------|--------------------------------|
| ETP  | ETP                          | Details ... | 382  | -0.4684861  | -1.6411649 | 0.01629328 | 0.028973093 | 0.03       | 4126        | tags=44%, list=20%, signal=54% |
| PROB | PROB                         | Details ... | 377  | -0.3373171  | -1.0778028 | 0.32649255 | 0.5672689   | 0.534      | 1949        | tags=21%, list=9%, signal=23%  |
| CMP  | CMP                          | Details ... | 393  | -0.18405107 | -0.6427968 | 0.990566   | 1           | 0.893      | 3485        | tags=22%, list=17%, signal=26% |
| MEP  | MEP                          | Details ... | 291  | -0.19895612 | -0.6379346 | 0.9136276  | 0.9646764   | 0.893      | 3840        | tags=23%, list=19%, signal=27% |

C) GSEA against human immunologic gene signatures (MSigDB v5.0 C7) (*TCF3-ZNF384* vs *TCF3-PBX1*)

GSEA report for *TCF3-ZNF384*

| NAME                                               | GS<br> follow link to MSigDB | GS DETAILS  | SIZE | ES         | NES       | NOM p-val   | FDR q-val   | FWER p-val | RANK AT MAX | LEADING EDGE                   |
|----------------------------------------------------|------------------------------|-------------|------|------------|-----------|-------------|-------------|------------|-------------|--------------------------------|
| GSE1460_CD4_THYMOCYTE_VS_NAIVE_CD4_TCELL_ADULT_BLC | GSE1460_CD4_                 | Details ... | 177  | 0.33746564 | 1.6087215 | 0.017094018 | 0.037194473 | 0.724      | 1230        | tags=12%, list=6%, signal=13%  |
| GSE26928_EFF_MEMORY_VS_CXCR5_POS_CD4_TCELL_DN      | GSE26928_EFF                 | Details ... | 141  | 0.37613487 | 1.4463005 | 0.022680413 | 0.3447518   | 0.916      | 4909        | tags=29%, list=24%, signal=38% |
| GSE14769_UNSTIM_VS_20MIN_LPS_BMDM_DN               | GSE14769_UNSTIM              | Details ... | 164  | 0.40083697 | 1.4777635 | 0.037698414 | 0.21089438  | 0.888      | 3974        | tags=27%, list=19%, signal=33% |
| GSE9988_ANTI_TREM1_AND_LPS_VS_CTRL_TREATED_MONOCY  | GSE9988_ANTI_                | Details ... | 162  | 0.49019605 | 1.5182555 | 0.042596348 | 0.24446587  | 0.841      | 4752        | tags=40%, list=23%, signal=52% |
| GSE9988_LPS_VS_LPS_AND_ANTI_TREM1_MONOCYTE_UP      | GSE9988_LPS_                 | Details ... | 156  | 0.4050558  | 1.4916824 | 0.043137256 | 0.27765304  | 0.874      | 5044        | tags=37%, list=24%, signal=48% |
| GSE17721_LPS_VS_POLYIC_6H_BMDM_UP                  | GSE17721_LPS_                | Details ... | 157  | 0.29068232 | 1.4497939 | 0.044397462 | 0.20392378  | 0.913      | 4429        | tags=22%, list=21%, signal=28% |
| GSE9037_CTRL_VS_LPS_4H_STIM_BMDM_DN                | GSE9037_CTRL                 | Details ... | 162  | 0.32124528 | 1.4600958 | 0.04897959  | 0.274942803 | 0.904      | 2402        | tags=15%, list=12%, signal=17% |

GSEA report for *TCF3-PBX1*

| NAME                                              | GS<br> follow link to MSigDB | GS DETAILS  | SIZE | ES          | NES        | NOM p-val   | FDR q-val   | FWER p-val | RANK AT MAX | LEADING EDGE                   |
|---------------------------------------------------|------------------------------|-------------|------|-------------|------------|-------------|-------------|------------|-------------|--------------------------------|
| GSE11924_TH2_VS_TH17_CD4_TCELL_DN                 | GSE11924_TH2_                | Details ... | 161  | -0.37319067 | -1.7356145 | 0.001926782 | 0.37194473  | 0.485      | 3809        | tags=29%, list=18%, signal=36% |
| GSE7852_THYMUS_VS_FAT_TCONV_UP                    | GSE7852_THYM                 | Details ... | 159  | -0.44943038 | -1.7351881 | 0.001937985 | 0.3447518   | 0.487      | 3544        | tags=40%, list=17%, signal=47% |
| GSE11924_TFH_VS_TH17_CD4_TCELL_DN                 | GSE11924_TFH_VS_TH17_CD      | Details ... | 166  | -0.3741893  | -1.577437  | 0.001937985 | 0.21089438  | 0.799      | 3392        | tags=27%, list=16%, signal=32% |
| GSE6269_HEALTHY_VS_FLU_INF_PBMUC_UP               | GSE6269_HEALTHY_VS_FLU_      | Details ... | 135  | -0.31380022 | -1.6906873 | 0.001980198 | 0.24446587  | 0.595      | 4073        | tags=23%, list=20%, signal=28% |
| GSE3982_NEUTROPHIL_VS_TH1_DN                      | GSE3982_NEUT                 | Details ... | 166  | -0.48392364 | -1.8192428 | 0.001992032 | 0.20392378  | 0.319      | 6036        | tags=52%, list=29%, signal=73% |
| GSE22886_IGM_MEMORY_BCELL_VS_BLOOD_PLASMA_CELL_DN | GSE22886_IGM_MEMORY_BC       | Details ... | 168  | -0.4596307  | -1.6731563 | 0.004166667 | 0.2375251   | 0.629      | 6186        | tags=49%, list=30%, signal=70% |
| GSE31082_DP_VS_CD4_SP_THYMOCYTE_UP                | GSE31082_DP_VS_CD4_SP_1      | Details ... | 159  | -0.36817768 | -1.7025849 | 0.005769231 | 0.27765304  | 0.571      | 3792        | tags=28%, list=18%, signal=34% |
| GSE1460_DP_VS_CD4_THYMOCYTE_UP                    | GSE1460_DP_VS_CD4_THYM       | Details ... | 180  | -0.3810149  | -1.613383  | 0.006       | 0.20392378  | 0.735      | 4340        | tags=34%, list=21%, signal=43% |
| GSE12366_GC_BCELL_VS_PLASMA_CELL_UP               | GSE12366_GC_                 | Details ... | 148  | -0.38012224 | -1.8028259 | 0.007662835 | 0.274942803 | 0.349      | 5776        | tags=39%, list=28%, signal=53% |



|                                                       |                           |     |             |            |             |            |       |      |                                |
|-------------------------------------------------------|---------------------------|-----|-------------|------------|-------------|------------|-------|------|--------------------------------|
| GSE12366_GC_VS_MEMORY_BCELL_UP                        | GSE12366_GC_Details ...   | 163 | -0.522833   | -1.8192351 | 0.007692308 | 0.9361189  | 0.319 | 3890 | tags=41%, list=19%, signal=50% |
| GSE12845_NAIVE_VS_PRE_GC_TONSIL_BCELL_DN              | GSE12845_NAI_Details ...  | 179 | -0.4895183  | -1.7671617 | 0.007858546 | 0.5502882  | 0.423 | 6117 | tags=54%, list=30%, signal=76% |
| GSE17721_CTRL_VS_CPG_4H_BMDM_UP                       | GSE17721_CTRL_VS_CPG_4H   | 165 | -0.3618407  | -1.5977855 | 0.008097166 | 0.20163664 | 0.765 | 5654 | tags=42%, list=27%, signal=57% |
| GSE18791_CTRL_VS_NEWCASTLE_VIRUS_DC_6H_UP             | GSE18791_CTRL_VS_NEWCA    | 149 | -0.48736522 | -1.6795055 | 0.008264462 | 0.24541709 | 0.619 | 5703 | tags=58%, list=28%, signal=80% |
| GSE8678_IL7R_LOW_VS_HIGH_EFF_CD8_TCELL_DN             | GSE8678_IL7R_LOW_VS_HI    | 162 | -0.34727418 | -1.6436207 | 0.008298756 | 0.20049086 | 0.685 | 4169 | tags=31%, list=20%, signal=38% |
| GSE17721_LPS_VS_PAM3CSK4_1H_BMDM_UP                   | GSE17721_LPS_VS_PAM3CS    | 171 | -0.38177276 | -1.6546199 | 0.009803922 | 0.21473943 | 0.661 | 4304 | tags=36%, list=21%, signal=45% |
| GSE14000_UNSTIM_VS_4H_LPS_DC_UP                       | GSE14000_UNSTIM_VS_4H_L   | 153 | -0.44615337 | -1.6797423 | 0.00998004  | 0.25319088 | 0.618 | 5946 | tags=49%, list=29%, signal=68% |
| GSE3982_EOSINOPHIL_VS_BCELL_DN                        | GSE3982_EOSI_Details ...  | 168 | -0.45229417 | -1.8019366 | 0.01        | 0.65603737 | 0.35  | 5389 | tags=49%, list=26%, signal=66% |
| GSE18791_CTRL_VS_NEWCASTLE_VIRUS_DC_12H_UP            | GSE18791_CTRL_VS_NEWCA    | 142 | -0.42723092 | -1.6462922 | 0.01002004  | 0.20379324 | 0.681 | 4257 | tags=41%, list=21%, signal=51% |
| GSE27786_CD8_TCELL_VS_NEUTROPHIL_UP                   | GSE27786_CD8_TCELL_VS_N   | 161 | -0.40046352 | -1.6652323 | 0.010060363 | 0.22826122 | 0.64  | 5569 | tags=45%, list=27%, signal=61% |
| GSE27786_LSK_VS_NEUTROPHIL_UP                         | GSE27786_LSK_VS_NEUTRO    | 163 | -0.3726469  | -1.6060375 | 0.011560693 | 0.20440449 | 0.752 | 4834 | tags=38%, list=23%, signal=49% |
| GSE27786_BCELL_VS_MONO_MAC_UP                         | GSE27786_BCELL_VS_MONO    | 154 | -0.35046542 | -1.6937022 | 0.012024048 | 0.25585184 | 0.591 | 6786 | tags=48%, list=33%, signal=71% |
| GSE22886_NAIVE_BCELL_VS_BLOOD_PLASMA_CELL_DN          | GSE22886_NAI_Details ...  | 170 | -0.52091664 | -1.7595673 | 0.012048192 | 0.44120187 | 0.432 | 5060 | tags=49%, list=25%, signal=65% |
| GSE9650_GP33_VS_GP276_LCMV_SPECIFIC_EXHAUSTED_CD8     | GSE9650_GP33_Details ...  | 163 | -0.36612213 | -1.7681553 | 0.013806706 | 0.6549454  | 0.422 | 5893 | tags=42%, list=29%, signal=58% |
| GSE7460_CTRL_VS_TGFB_TREATED_ACT_TREG_UP              | GSE7460_CTRL_VS_TGFB_T    | 162 | -0.43776155 | -1.6843278 | 0.015209125 | 0.25000167 | 0.608 | 2866 | tags=27%, list=14%, signal=31% |
| GSE14769_40MIN_VS_360MIN_LPS_BMDM_UP                  | GSE14769_40MIN_VS_360M    | 161 | -0.3339665  | -1.5574337 | 0.015625    | 0.2163707  | 0.825 | 4453 | tags=33%, list=22%, signal=42% |
| GSE17721_POLYIC_VS_PAM3CSK4_2H_BMDM_UP                | GSE17721_POLYIC_VS_PAM3   | 159 | -0.2942012  | -1.5409309 | 0.015717093 | 0.21756375 | 0.842 | 5189 | tags=33%, list=25%, signal=44% |
| GSE15930_NAIVE_VS_48H_IN_VITRO_STIM_IL12_CD8_TCELL_DN | GSE15930_NAIVE_VS_48H_I   | 174 | -0.4951393  | -1.6966699 | 0.015968064 | 0.25803077 | 0.58  | 5722 | tags=53%, list=28%, signal=73% |
| GSE17721_LPS_VS_GARDIQUIMOD_2H_BMDM_DN                | GSE17721_LPS_VS_GARDIQ    | 156 | -0.3299557  | -1.6361172 | 0.016129032 | 0.2022563  | 0.698 | 5167 | tags=36%, list=25%, signal=48% |
| GSE17721_CTRL_VS_LPS_4H_BMDM_UP                       | GSE17721_CTRL_VS_LPS_4H   | 162 | -0.40372312 | -1.671067  | 0.01629328  | 0.23506929 | 0.632 | 5584 | tags=42%, list=27%, signal=57% |
| GSE24634_TEFF_VS_TCONV_DAY3_IN_CULTURE_UP             | GSE24634_TEFF_VS_TCONV    | 171 | -0.459076   | -1.6997796 | 0.017307693 | 0.2727451  | 0.577 | 4784 | tags=47%, list=23%, signal=61% |
| GSE17721_4_VS_24H_GARDIQUIMOD_BMDM_DN                 | GSE17721_4_VS_24H_GARDI   | 158 | -0.38405457 | -1.6056604 | 0.017374517 | 0.20213072 | 0.753 | 3757 | tags=28%, list=18%, signal=34% |
| GSE12366_GC_VS_NAIVE_BCELL_UP                         | GSE12366_GC_Details ...   | 172 | -0.49054658 | -1.7618054 | 0.01775148  | 0.49465665 | 0.43  | 3170 | tags=34%, list=15%, signal=40% |
| GSE3982_MAC_VS_NEUTROPHIL_UP                          | GSE3982_MAC_VS_NEUTROF    | 168 | -0.37497038 | -1.6290001 | 0.01778656  | 0.20375589 | 0.708 | 4266 | tags=32%, list=21%, signal=40% |
| GSE15930_NAIVE_VS_48H_IN_VITRO_STIM_CD8_TCELL_DN      | GSE15930_NAI_Details ...  | 171 | -0.53665197 | -1.7515804 | 0.018329939 | 0.42474803 | 0.455 | 5609 | tags=54%, list=27%, signal=74% |
| GSE18791_UNSTIM_VS_NEWCASTLE_VIRUS_DC_10H_UP          | GSE18791_UNSTIM_VS_NEW    | 157 | -0.41169968 | -1.6333776 | 0.018367346 | 0.20340547 | 0.702 | 5743 | tags=51%, list=28%, signal=70% |
| GSE3982_NKCELL_VS_TH1_DN                              | GSE3982_NKCELL_VS_TH1_I   | 175 | -0.47317117 | -1.7031919 | 0.019305019 | 0.28867412 | 0.57  | 5060 | tags=50%, list=25%, signal=65% |
| GSE27786_BCELL_VS_NEUTROPHIL_UP                       | GSE27786_BCELL_VS_NEUTF   | 163 | -0.37157297 | -1.6791881 | 0.019646365 | 0.23836985 | 0.62  | 5653 | tags=40%, list=27%, signal=55% |
| GSE3982_NEUTROPHIL_VS_TH2_DN                          | GSE3982_NEUTROPHIL_VS_1   | 173 | -0.4119096  | -1.6924269 | 0.019646365 | 0.24892874 | 0.591 | 4940 | tags=37%, list=24%, signal=48% |
| GSE24634_TEFF_VS_TCONV_DAY5_IN_CULTURE_UP             | GSE24634_TEFI_Details ... | 170 | -0.5509877  | -1.7171371 | 0.01984127  | 0.29766437 | 0.526 | 4326 | tags=52%, list=21%, signal=65% |
| GSE15930_STIM_VS_STIM_AND_IFNAB_48H_CD8_T_CELL_UP     | GSE15930_STIM_VS_STIM_AI  | 165 | -0.42087573 | -1.603273  | 0.020408163 | 0.19788472 | 0.759 | 5096 | tags=42%, list=25%, signal=56% |
| GSE27786_NKTCCELL_VS_MONO_MAC_UP                      | GSE27786_NKTCCELL_VS_MO   | 152 | -0.34989887 | -1.6529934 | 0.020491803 | 0.20416625 | 0.668 | 6617 | tags=34%, list=23%, signal=68% |
| GSE3982_EOSINOPHIL_VS_TH2_DN                          | GSE3982_EOSINOPHIL_VS_T   | 166 | -0.46714413 | -1.6565821 | 0.021653544 | 0.22145082 | 0.657 | 5903 | tags=50%, list=29%, signal=70% |
| GSE3982_MAST_CELL_VS_MAC_UP                           | GSE3982_MAST_CELL_VS_M    | 168 | -0.27767098 | -1.4100649 | 0.02238806  | 0.2760442  | 0.949 | 4824 | tags=30%, list=23%, signal=39% |
| GSE31082_DP_VS_CD8_SP_THYMOCYTE_UP                    | GSE31082_DP_VS_CD8_SP_1   | 165 | -0.42399752 | -1.6622424 | 0.023076924 | 0.22204353 | 0.644 | 5000 | tags=41%, list=24%, signal=54% |
| GSE17974_1H_VS_72H_UNTREATED_IN_VITRO_CD4_TCELL_DN    | GSE17974_1H_1_Details ... | 163 | -0.5044418  | -1.7097899 | 0.023391813 | 0.30148944 | 0.549 | 4983 | tags=47%, list=24%, signal=61% |
| GSE17721_LPS_VS_GARDIQUIMOD_4H_BMDM_DN                | GSE17721_LPS_VS_GARDIQ    | 158 | -0.36429206 | -1.6071168 | 0.023809524 | 0.20555118 | 0.75  | 6083 | tags=46%, list=30%, signal=65% |
| GSE24634_NAIVE_CD4_TCELL_VS_DAY5_IL4_CONV_TREG_DN     | GSE24634_NAI_Details ...  | 171 | -0.50540364 | -1.7415781 | 0.023952097 | 0.38296354 | 0.471 | 5931 | tags=51%, list=29%, signal=71% |
| GSE22886_UNSTIM_VS_IL2_STIM_NKCELL_DN                 | GSE22886_UNSDetails ...   | 171 | -0.5102354  | -1.7201511 | 0.024242423 | 0.30570662 | 0.521 | 5060 | tags=51%, list=25%, signal=68% |
| GSE30962_PRIMARY_VS_SECONDARY_CHRONIC_LCMV_INF_CD     | GSE30962_PRIMARY_VS_SEC   | 168 | -0.37866879 | -1.6209435 | 0.024390243 | 0.20329282 | 0.724 | 3691 | tags=31%, list=18%, signal=37% |
| GSE27786_LIN_NEG_VS_NKTCCELL_UP                       | GSE27786_LIN_NEG_VS_NKT   | 160 | -0.36858377 | -1.5171598 | 0.024482109 | 0.21721402 | 0.874 | 4260 | tags=38%, list=21%, signal=48% |
| GSE10325_BCELL_VS_MYELOID_UP                          | GSE10325_BCELL_VS_MYELI   | 169 | -0.46304485 | -1.6979766 | 0.024691358 | 0.26594183 | 0.579 | 2800 | tags=34%, list=14%, signal=39% |
| GSE17721_CTRL_VS_PAM3CSK4_12H_BMDM_UP                 | GSE17721_CTRL_VS_PAM3C    | 170 | -0.35429227 | -1.5467039 | 0.025641026 | 0.21978496 | 0.834 | 4967 | tags=36%, list=24%, signal=47% |
| GSE15750_DAY6_VS_DAY10_TRAFK6O_EFF_CD8_TCELL_UP       | GSE15750_DAY6_VS_DAY10_   | 164 | -0.6523738  | -1.6516205 | 0.0256917   | 0.20230612 | 0.67  | 3449 | tags=56%, list=17%, signal=67% |
| GSE10325_LUPUS_BCELL_VS_LUPUS_MYELOID_UP              | GSE10325_LUPI_Details ... | 174 | -0.45834026 | -1.744506  | 0.025948104 | 0.4084337  | 0.467 | 2800 | tags=29%, list=14%, signal=34% |
| GSE7764_IL15_TREATED_VS_CTRL_NK_CELL_24H_UP           | GSE7764_IL15_TREATED_VS   | 161 | -0.5137729  | -1.6275978 | 0.026748972 | 0.20261496 | 0.708 | 5602 | tags=57%, list=27%, signal=78% |
| GSE29614_DAY3_VS_DAY7_TIV_FLU_VACCINE_PBMCDN          | GSE29614_DAY3_VS_DAY7_T   | 156 | -0.4711091  | -1.5918162 | 0.027131783 | 0.20645094 | 0.776 | 3114 | tags=38%, list=15%, signal=45% |
| GSE27786_LIN_NEG_VS_NEUTROPHIL_UP                     | GSE27786_LIN_NEG_VS_NEL   | 153 | -0.3316473  | -1.523693  | 0.027504912 | 0.21346933 | 0.867 | 5394 | tags=34%, list=26%, signal=46% |
| GSE17721_PAM3CSK4_VS_CPG_4H_BMDM_UP                   | GSE17721_PAM3CSK4_VS_CI   | 157 | -0.30056247 | -1.4955568 | 0.027504912 | 0.2280269  | 0.893 | 5398 | tags=34%, list=26%, signal=43% |
| GSE17721_PAM3CSK4_VS_GADIQUIMOD_1H_BMDM_DN            | GSE17721_PAM3CSK4_VS_G    | 168 | -0.26715207 | -1.4902186 | 0.027777778 | 0.23209296 | 0.896 | 5356 | tags=36%, list=26%, signal=48% |
| GSE17974_CTRL_VS_ACT_IL4_AND_ANTI_IL12_24H_CD4_TCELL  | GSE17974_CTRL_VS_ACT_IL   | 169 | -0.56491524 | -1.6560212 | 0.027944112 | 0.21725832 | 0.658 | 5113 | tags=64%, list=25%, signal=84% |
| GSE27786_NEUTROPHIL_VS_MONO_MAC_DN                    | GSE27786_NEUTROPHIL_VS    | 159 | -0.3562016  | -1.5322986 | 0.028       | 0.20662028 | 0.856 | 3528 | tags=27%, list=17%, signal=32% |
| GSE11864_UNTREATED_VS_CSF1_PAM3CYS_IN_MAC_DN          | GSE11864_UNTREATED_VS_    | 160 | -0.35024798 | -1.4813654 | 0.028455285 | 0.23034781 | 0.901 | 4639 | tags=35%, list=23%, signal=45% |
| GSE17721_CTRL_VS_CPG_12H_BMDM_UP                      | GSE17721_CTRL_VS_CPG_1    | 177 | -0.3554754  | -1.61136   | 0.029069768 | 0.20390052 | 0.739 | 6222 | tags=42%, list=30%, signal=59% |
| GSE3982_NEUTROPHIL_VS_BCELL_DN                        | GSE3982_NEUTROPHIL_VS_I   | 169 | -0.36664388 | -1.6502465 | 0.02964427  | 0.20081311 | 0.67  | 5027 | tags=33%, list=24%, signal=43% |
| KAECH_DAY8_EFF_VS_DAY15_EFF_CD8_TCELL_UP              | KAECH_DAY8_EFF_VS_DAY15   | 171 | -0.466882   | -1.6328948 | 0.030549899 | 0.20053278 | 0.702 | 5366 | tags=50%, list=26%, signal=67% |
| GSE17721_LPS_VS_GARDIQUIMOD_1H_BMDM_DN                | GSE17721_LPS_VS_GARDIQ    | 162 | -0.26639992 | -1.4338223 | 0.03245436  | 0.25336707 | 0.935 | 5724 | tags=35%, list=28%, signal=47% |

|                                                        |                          |     |             |            |             |            |       |                                     |
|--------------------------------------------------------|--------------------------|-----|-------------|------------|-------------|------------|-------|-------------------------------------|
| GSE15930_STIM_VS_STIM_AND_IL-12_24H_CD8_T_CELL_UP      | GSE15930_STIM_VS_STIM_AI | 178 | -0.2994922  | -1.4238029 | 0.03250478  | 0.2640218  | 0.941 | 3984 tags=25%, list=19%, signal=31% |
| GSE14308_TH1_VS_NAIVE_CD4_TCELL_UP                     | GSE14308_TH1_VS_NAIVE_C  | 154 | -0.3365876  | -1.499594  | 0.033126295 | 0.2262736  | 0.886 | 4990 tags=32%, list=24%, signal=43% |
| GSE17721_CTRL_VS_CPG_1H_BMDM_UP                        | GSE17721_CTRL_VS_CPG_1H  | 157 | -0.35536838 | -1.5401206 | 0.033472802 | 0.21323732 | 0.844 | 6030 tags=43%, list=29%, signal=60% |
| GSE17974_1.5H_VS_72H_IL4_AND_ANTI_IL12_ACT_CD4_TCELL_I | GSE17974_1.5H_VS_72H_IL4 | 160 | -0.5213725  | -1.5801189 | 0.034412954 | 0.21094163 | 0.794 | 4333 tags=48%, list=21%, signal=60% |
| GSE10239_NAIVE_VS_DAY4.5_EFF_CD8_TCELL_DN              | GSE10239_NAIVE_VS_DAY4.5 | 171 | -0.5131755  | -1.6535718 | 0.035363458 | 0.2119548  | 0.666 | 3871 tags=47%, list=19%, signal=57% |
| GSE15930_NAIVE_VS_48H_IN_VITRO_STIM_IFNAB_CD8_TCELL_I  | GSE15930_NAIVE_VS_48H_IN | 168 | -0.48935696 | -1.6686445 | 0.035643563 | 0.22739045 | 0.636 | 5027 tags=48%, list=24%, signal=62% |
| GSE3982_DC_VS_TH2_DN                                   | GSE3982_DC_VS_TH2_DN     | 170 | -0.38896596 | -1.4976258 | 0.036121674 | 0.22775947 | 0.888 | 3642 tags=37%, list=18%, signal=45% |
| GSE17721_CPG_VS_GARDIQUIMOD_0.5H_BMDM_DN               | GSE17721_CPG_VS_GARDIQ   | 163 | -0.3157662  | -1.4489967 | 0.036437247 | 0.24114162 | 0.928 | 3941 tags=23%, list=19%, signal=28% |
| GSE22886_NAIVE_CD4_TCELL_VS_48H_ACT_TH1_DN             | GSE22886_NAI             | 175 | -0.5288967  | -1.7093914 | 0.036511157 | 0.2873333  | 0.55  | 5958 tags=60%, list=29%, signal=84% |
| GSE29617_CTRL_VS_TIV_FLU_VACCINE_PBMC_2008_DN          | GSE29617_CTRL_VS_TIV_FLU | 164 | -0.49364087 | -1.6413162 | 0.036750484 | 0.19691151 | 0.689 | 5923 tags=60%, list=29%, signal=84% |
| GSE27786_BCELL_VS_NKCELL_UP                            | GSE27786_BCELL_VS_NKCEI  | 166 | -0.28336653 | -1.4711748 | 0.036893204 | 0.23732737 | 0.912 | 4943 tags=33%, list=24%, signal=43% |
| GSE31082_DN_VS_CD4_SP_THYMOCYTE_UP                     | GSE31082_DN_Details ...  | 151 | -0.38573235 | -1.7211057 | 0.037401576 | 0.32199946 | 0.518 | 6713 tags=48%, list=33%, signal=71% |
| GSE10239_NAIVE_VS_KLRG1HIGH_EFF_CD8_TCELL_DN           | GSE10239_NAIVE_VS_KLRG1  | 171 | -0.4661912  | -1.619192  | 0.03809524  | 0.20334531 | 0.726 | 3219 tags=40%, list=16%, signal=47% |
| GSE10239_MEMORY_VS_KLRG1INT_EFF_CD8_TCELL_DN           | GSE10239_MEMORY_VS_KLF   | 164 | -0.4516328  | -1.6774895 | 0.038535647 | 0.23522162 | 0.621 | 4988 tags=42%, list=24%, signal=55% |
| GSE17974_0H_VS_6H_IN_VITRO_ACT_CD4_TCELL_DN            | GSE17974_0H_VS_6H_IN_VIT | 164 | -0.41806313 | -1.5814325 | 0.03929273  | 0.21124993 | 0.793 | 4437 tags=41%, list=22%, signal=52% |
| GSE17721_LPS_VS_CPG_4H_BMDM_DN                         | GSE17721_LPS_VS_CPG_4H   | 163 | -0.3322323  | -1.4890099 | 0.039447732 | 0.231101   | 0.897 | 5613 tags=38%, list=27%, signal=52% |
| GSE22886_NAIVE_CD8_TCELL_VS_NEUTROPHIL_UP              | GSE22886_NAIVE_CD8_TCEL  | 166 | -0.36592644 | -1.6423329 | 0.03950104  | 0.19876805 | 0.686 | 6540 tags=51%, list=32%, signal=74% |
| GSE17721_POLYIC_VS_CPG_2H_BMDM_UP                      | GSE17721_POLYIC_VS_CPG   | 163 | -0.29259497 | -1.4824418 | 0.03968254  | 0.23146191 | 0.9   | 6361 tags=42%, list=31%, signal=60% |
| GSE17721_POLYIC_VS_PAM3CSK4_16H_BMDM_DN                | GSE17721_POLYIC_VS_PAM3  | 166 | -0.32853112 | -1.4838415 | 0.03976143  | 0.23046842 | 0.899 | 5156 tags=39%, list=25%, signal=51% |
| GSE27786_LSK_VS_ERYTHROBLAST_UP                        | GSE27786_LSK_VS_ERYTHR   | 166 | -0.32735    | -1.5028352 | 0.04008016  | 0.22907172 | 0.884 | 5700 tags=43%, list=28%, signal=59% |
| GSE17721_POLYIC_VS_PAM3CSK4_12H_BMDM_DN                | GSE17721_POLYIC_VS_PAM3  | 163 | -0.3860151  | -1.543731  | 0.04024145  | 0.21900252 | 0.84  | 4755 tags=40%, list=23%, signal=51% |
| GSE12845_IgD_POS_BLOOD_VS_DARKZONE_GC_TONSIL_BCEL      | GSE12845_IgD_POS_BLOOD   | 159 | -0.3593544  | -1.6531118 | 0.040697675 | 0.208363   | 0.668 | 5382 tags=42%, list=26%, signal=56% |
| GSE17721_LPS_VS_POLYIC_2H_BMDM_DN                      | GSE17721_LPS_VS_POLYIC   | 155 | -0.28217888 | -1.5158023 | 0.04106776  | 0.21752729 | 0.875 | 6664 tags=40%, list=32%, signal=59% |
| GSE18791_UNSTIM_VS_NEWCATSLE_VIRUS_DC_18H_UP           | GSE18791_UNSTIM_VS_NEW   | 158 | -0.39313623 | -1.5567608 | 0.04158416  | 0.21556179 | 0.825 | 6156 tags=53%, list=30%, signal=75% |
| GSE10239_MEMORY_VS_KLRG1HIGH_EFF_CD8_TCELL_DN          | GSE10239_MeV_Details ... | 175 | -0.42298618 | -1.7316015 | 0.042592593 | 0.33084366 | 0.491 | 4944 tags=40%, list=25%, signal=52% |
| GSE7852_LN_VS_FAT_TREG_UP                              | GSE7852_LN_VS_FAT_TREG   | 157 | -0.32553187 | -1.5264529 | 0.04323308  | 0.21243824 | 0.865 | 4834 tags=31%, list=23%, signal=40% |
| GSE3982_DC_VS_TH1_DN                                   | GSE3982_DC_VS_TH1_DN     | 171 | -0.35563332 | -1.417761  | 0.04330709  | 0.2692406  | 0.943 | 4074 tags=36%, list=20%, signal=45% |
| GSE28237_FOLLICULAR_VS_EARLY_GC_BCELL_DN               | GSE28237_FOLLICULAR_VS   | 167 | -0.29813054 | -1.4500598 | 0.043564357 | 0.24203181 | 0.927 | 4310 tags=28%, list=21%, signal=35% |
| GSE26669_CD4_VS_CD8_TCELL_IN_MLR_COSTIM_BLOCK_UP       | GSE26669_CD4_VS_CD8_TCE  | 162 | -0.31353465 | -1.3980105 | 0.043643262 | 0.27854088 | 0.959 | 4290 tags=31%, list=21%, signal=39% |
| GSE22886_UNSTIM_VS_STIM_MEMORY_TCELL_DN                | GSE22886_UN              | 176 | -0.4455266  | -1.7306097 | 0.045454547 | 0.311402   | 0.493 | 6249 tags=47%, list=30%, signal=66% |
| GSE7460_CD8_TCELL_VS_TREG_ACT_DN                       | GSE7460_CD8_TCELL_VS_TF  | 162 | -0.35797954 | -1.577453  | 0.04699248  | 0.21333385 | 0.799 | 5051 tags=40%, list=25%, signal=52% |
| GSE15733_BM_VS_SPLEEN_MEMORY_CD4_TCELL_DN              | GSE15733_BM_VS_SPLEEN_I  | 163 | -0.32125932 | -1.4740635 | 0.048681542 | 0.23680973 | 0.908 | 4821 tags=36%, list=25%, signal=47% |
| GSE3982_BASOPHIL_VS_TH2_DN                             | GSE3982_BASOPHIL_VS_TH2  | 170 | -0.41572902 | -1.5209817 | 0.04892368  | 0.21274202 | 0.868 | 5260 tags=46%, list=26%, signal=61% |
| GSE14769_UNSTIM_VS_360MIN_LPS_BMDM_UP                  | GSE14769_UNSTIM_VS_360M  | 168 | -0.36311436 | -1.511867  | 0.04892368  | 0.22091089 | 0.879 | 6470 tags=49%, list=31%, signal=71% |
| GSE22886_NAIVE_CD4_TCELL_VS_48H_ACT_TH2_DN             | GSE22886_NAIVE_CD4_TCEL  | 179 | -0.41824606 | -1.643926  | 0.049056605 | 0.20386197 | 0.684 | 5258 tags=42%, list=26%, signal=56% |
| GOLDRATH_EFF_VS_MEMORY_CD8_TCELL_UP                    | GOLDRATH_EFF_VS_MEMOR    | 178 | -0.49769166 | -1.5591676 | 0.049115915 | 0.22021863 | 0.824 | 4773 tags=53%, list=23%, signal=69% |
| GSE17974_CTRL_VS_ACT_IL4_AND_ANTI_IL12_4H_CD4_TCELL_I  | GSE17974_CTRL_VS_ACT_IL4 | 152 | -0.41015944 | -1.5506785 | 0.0498008   | 0.21518868 | 0.832 | 5467 tags=47%, list=27%, signal=63% |
| GSE24634_TREG_VS_TCONV_POST_DAY5_IL4_CONVERSION_UF     | GSE24634_TREG_VS_TCONV   | 168 | -0.48645633 | -1.6687236 | 0.049808428 | 0.23354624 | 0.636 | 4018 tags=45%, list=19%, signal=56% |
| GSE18791_CTRL_VS_NEWCASTLE_VIRUS_DC_10H_UP             | GSE18791_CTRL_VS_NEWCA   | 151 | -0.4206335  | -1.5385376 | 0.0499002   | 0.20519753 | 0.845 | 5154 tags=52%, list=25%, signal=69% |
| GSE15930_STIM_VS_STIM_AND_IFNAB_72H_CD8_T_CELL_DN      | GSE15930_STIM_VS_STIM_AI | 172 | -0.31593072 | -1.4939582 | 0.0501002   | 0.22908938 | 0.895 | 4519 tags=31%, list=22%, signal=39% |
| GSE3982_TGFBETA1_VS_TGFBETA3_IN_IL6_TREATED_CD4_TCI    | GSE3982_TGFBETA1_VS_TC   | 175 | -0.26338756 | -1.4999834 | 0.05065666  | 0.22726434 | 0.886 | 6541 tags=39%, list=32%, signal=56% |
| GSE3982_CTRL_VS_LPS_4H_MAC_UP                          | GSE3982_CTRL_VS_LPS_4H   | 162 | -0.32312253 | -1.4736375 | 0.051039696 | 0.23610385 | 0.909 | 4720 tags=33%, list=23%, signal=43% |
| GSE18791_CTRL_VS_NEWCASTLE_VIRUS_DC_4H_UP              | GSE18791_CTRL_VS_NEWCA   | 153 | -0.4309972  | -1.5582576 | 0.051282052 | 0.21941863 | 0.824 | 5473 tags=50%, list=27%, signal=68% |
| GSE29618_PRE_VS_DAY7_POST_TIV_FLU_VACCINE_BCELL_DN     | GSE29618_PRE_VS_DAY7_PC  | 172 | -0.29171893 | -1.4872073 | 0.05179283  | 0.23251922 | 0.898 | 4990 tags=34%, list=24%, signal=45% |
| GSE24634_TREG_VS_TCONV_POST_DAY7_IL4_CONVERSION_UF     | GSE24634_TREG_VS_TCONV   | 181 | -0.48621997 | -1.5567573 | 0.05263158  | 0.21340616 | 0.825 | 3708 tags=49%, list=18%, signal=59% |
| GSE14000_4H_VS_16H_LPS_DC_TRANSLATED_RNA_DN            | GSE14000_4H_VS_16H_LPS_I | 156 | -0.36310714 | -1.5554607 | 0.053407    | 0.21356735 | 0.826 | 3527 tags=27%, list=17%, signal=32% |
| GSE15930_NAIVE_VS_24H_IN_VITRO_STIM_IFNAB_CD8_TCELL_I  | GSE15930_NAIVE_VS_24H_IN | 165 | -0.46361712 | -1.6149026 | 0.05421687  | 0.20444359 | 0.733 | 5711 tags=56%, list=28%, signal=77% |
| GSE30962_ACUTE_VS_CHRONIC_LCMV_SECONDARY_INF_CD8       | GSE30962_ACUTE_VS_CHRC   | 172 | -0.3816741  | -1.460884  | 0.054820415 | 0.23643881 | 0.922 | 2487 tags=29%, list=12%, signal=33% |
| GSE15930_NAIVE_VS_24H_IN_VITRO_STIM_CD8_TCELL_DN       | GSE15930_NAIVE_VS_24H_IN | 161 | -0.48106924 | -1.6271472 | 0.056       | 0.19992575 | 0.708 | 5397 tags=56%, list=26%, signal=75% |
| GSE24026_PD1_LIGATION_VS_CTRL_IN_ACT_TCELL_LINE_DN     | GSE24026_PD1_LIGATION_VS | 178 | -0.36310765 | -1.5610069 | 0.056092843 | 0.22393724 | 0.821 | 3788 tags=28%, list=18%, signal=34% |
| GSE29617_CTRL_VS_DAY3_TIV_FLU_VACCINE_PBMC_2008_DN     | GSE29617_CTRL_VS_DAY3_T  | 164 | -0.43299812 | -1.5699043 | 0.05645161  | 0.21861139 | 0.809 | 5836 tags=54%, list=28%, signal=75% |
| GSE3982_NKCELL_VS_TH2_DN                               | GSE3982_NKCELL_VS_TH2_I  | 169 | -0.44070363 | -1.6104481 | 0.056710776 | 0.20253374 | 0.743 | 5423 tags=50%, list=26%, signal=67% |
| GSE27786_LIN_NEG_VS_MONO_MAC_UP                        | GSE27786_LIN_NEG_VS_MON  | 157 | -0.3320003  | -1.5146793 | 0.056751467 | 0.21802244 | 0.877 | 4940 tags=40%, list=24%, signal=52% |
| GSE24634_TEFF_VS_TCONV_DAY7_IN_CULTURE_UP              | GSE24634_TEFF_VS_TCONV   | 182 | -0.502562   | -1.5687183 | 0.056925997 | 0.21569642 | 0.809 | 3239 tags=44%, list=16%, signal=52% |
| GSE2197_CPG_DNA_VS_UNTREATED_IN_DC_DN                  | GSE2197_CPG_DNA_VS_UNT   | 161 | -0.38539422 | -1.4605256 | 0.057142857 | 0.23571822 | 0.922 | 4615 tags=41%, list=22%, signal=52% |
| GSE3982_MEMORY_CD4_TCELL_VS_TH1_DN                     | GSE3982_MEMORY_CD4_TCI   | 179 | -0.39640704 | -1.5225542 | 0.057768926 | 0.21187922 | 0.867 | 5060 tags=46%, list=25%, signal=60% |
| GSE29618_BCELL_VS_MONOCYTE_DAY7_FLU_VACCINE_UP         | GSE29618_BCELL_VS_MONO   | 165 | -0.38677534 | -1.5689304 | 0.057768926 | 0.21774268 | 0.809 | 2375 tags=22%, list=12%, signal=25% |

|                                                        |                          |     |             |            |             |            |       |      |                                |
|--------------------------------------------------------|--------------------------|-----|-------------|------------|-------------|------------|-------|------|--------------------------------|
| GSE24634_TREG_VS_TCONV_POST_DAY3_IL4_CONVERSION_UF     | GSE24634_TREG_VS_TCONV   | 166 | -0.491722   | -1.6049969 | 0.05788423  | 0.20031321 | 0.754 | 6036 | tags=61%, list=29%, signal=85% |
| GSE18791_CTRL_VS_NEWCASTLE_VIRUS_DC_8H_UP              | GSE18791_CTRL_VS_NEWCA   | 150 | -0.41398737 | -1.5097904 | 0.05811623  | 0.22266048 | 0.881 | 5709 | tags=53%, list=28%, signal=72% |
| GSE17974_CTRL_VS_ACT_IL4_AND_ANTI_IL12_72H_CD4_TCELL   | GSE17974_CTRL_VS_ACT_IL  | 168 | -0.40460244 | -1.5078679 | 0.05882353  | 0.22412412 | 0.883 | 4715 | tags=43%, list=23%, signal=55% |
| GSE339_EX_VIVO_VS_IN_CULTURE_CD8POS_DC_UP              | GSE339_EX_VIVO_VS_IN_CU  | 173 | -0.3082182  | -1.484598  | 0.06        | 0.23231435 | 0.899 | 5454 | tags=36%, list=26%, signal=49% |
| GSE14769_UNSTIM_VS_240MIN_LPS_BMDM_UP                  | GSE14769_UNSTIM_VS_240M  | 157 | -0.33431798 | -1.4548086 | 0.062374245 | 0.23955457 | 0.926 | 5115 | tags=36%, list=25%, signal=47% |
| GSE29618_BCELL_VS_MDC_UP                               | GSE29618_BCELL_VS_MDC_I  | 163 | -0.37067127 | -1.5423027 | 0.06324111  | 0.21728106 | 0.841 | 2777 | tags=25%, list=13%, signal=29% |
| GSE12845_IGD_POS_VS_NEG_BLOOD_BCELL_DN                 | GSE12845_IGD_POS_VS_NEG  | 166 | -0.4181409  | -1.5617651 | 0.06326531  | 0.2252566  | 0.82  | 4904 | tags=40%, list=24%, signal=52% |
| GSE17721_POLYIC_VS_PAM3CSK4_8H_BMDM_DN                 | GSE17721_POLYIC_VS_PAM3  | 168 | -0.3626924  | -1.5393734 | 0.06365503  | 0.20723636 | 0.845 | 5102 | tags=39%, list=25%, signal=52% |
| GSE15930_NAIVE_VS_72H_IN_VITRO_STIM_CD8_TCELL_DN       | GSE15930_NAIVE_VS_72H_IN | 165 | -0.44581777 | -1.5516951 | 0.064       | 0.21552181 | 0.83  | 4890 | tags=46%, list=24%, signal=60% |
| GSE17721_0.5H_VS_8H_GARDIQUIMOD_BMDM_UP                | GSE17721_0.5H_VS_8H_GAR  | 167 | -0.3845413  | -1.5008959 | 0.06412826  | 0.22743362 | 0.886 | 5158 | tags=45%, list=25%, signal=59% |
| GSE3982_EOSINOPHIL_VS_MAC_DN                           | GSE3982_EOSINOPHIL_VS_M  | 175 | -0.34824818 | -1.4680253 | 0.064453125 | 0.23684284 | 0.918 | 5697 | tags=45%, list=28%, signal=62% |
| GSE15930_NAIVE_VS_24H_IN_VITRO_STIM_IL12_CD8_TCELL_DN  | GSE15930_NAIVE_VS_24H_IN | 162 | -0.45971823 | -1.5721402 | 0.06464647  | 0.21739563 | 0.807 | 5426 | tags=54%, list=26%, signal=73% |
| GSE10239_NAIVE_VS_KLRG1INT_EFF_CD8_TCELL_DN            | GSE10239_NAIVE_VS_KLRG1  | 166 | -0.41880092 | -1.4891001 | 0.0665362   | 0.23246467 | 0.897 | 4998 | tags=45%, list=24%, signal=59% |
| GSE22886_UNSTIM_VS_IL15_STIM_NKCELL_DN                 | GSE22886_UNSTIM_VS_IL15  | 176 | -0.48756048 | -1.6638608 | 0.06680162  | 0.2247524  | 0.642 | 6352 | tags=61%, list=31%, signal=88% |
| GSE17974_0.5H_VS_72H_UNTREATED_IN_VITRO_CD4_TCELL_DI   | GSE17974_0.5H_VS_72H_UN  | 166 | -0.47802916 | -1.5866809 | 0.06746032  | 0.20962079 | 0.784 | 5009 | tags=54%, list=24%, signal=70% |
| GSE17974_CTRL_VS_ACT_IL4_AND_ANTI_IL12_48H_CD4_TCELL   | GSE17974_CTRL_VS_ACT_IL  | 159 | -0.47184518 | -1.5592844 | 0.06782946  | 0.22472107 | 0.824 | 5764 | tags=54%, list=28%, signal=75% |
| GSE14769_UNSTIM_VS_120MIN_LPS_BMDM_UP                  | GSE14769_UNSTIM_VS_120M  | 149 | -0.35515276 | -1.4768655 | 0.06790123  | 0.23667753 | 0.907 | 5665 | tags=43%, list=27%, signal=59% |
| GSE24634_TEFF_VS_TCONV_DAY10_IN_CULTURE_UP             | GSE24634_TEFF_VS_TCONV   | 174 | -0.40218067 | -1.4533516 | 0.06818182  | 0.23930773 | 0.926 | 2487 | tags=30%, list=12%, signal=34% |
| GSE17721_POLYIC_VS_PAM3CSK4_6H_BMDM_DN                 | GSE17721_POLYIC_VS_PAM3  | 172 | -0.3493724  | -1.5338768 | 0.06882591  | 0.20576726 | 0.851 | 7098 | tags=51%, list=34%, signal=77% |
| GSE22886_NEUTROPHIL_VS_DC_DN                           | GSE22886_NEUTROPHIL_VS   | 175 | -0.34903568 | -1.593093  | 0.06952965  | 0.20692839 | 0.772 | 6532 | tags=46%, list=32%, signal=66% |
| GSE29614_CTRL_VS_DAY7_TIV_FLU_VACCINE_PBMCDN           | GSE29614_CTRL_VS_DAY7_T  | 160 | -0.4877336  | -1.5444667 | 0.069767445 | 0.22215314 | 0.84  | 3127 | tags=42%, list=15%, signal=49% |
| GSE3982_DC_VS_NEUTROPHIL_LPS_STIM_UP                   | GSE3982_DC_VS_NEUTROPHI  | 172 | -0.32987052 | -1.4575875 | 0.06986028  | 0.23634581 | 0.924 | 6104 | tags=54%, list=30%, signal=67% |
| GSE30962_PRIMARY_VS_SECONDARY_ACUTE_LCMV_INF_CD8       | GSE30962_PRIMARY_VS_SEC  | 167 | -0.5362305  | -1.537803  | 0.07017544  | 0.20474963 | 0.847 | 3796 | tags=50%, list=18%, signal=61% |
| GSE13485_DAY1_VS_DAY21_YF17D_VACCINE_PBMCDN            | GSE13485_DAY1_VS_DAY21   | 151 | -0.4953209  | -1.6254344 | 0.0707635   | 0.19946536 | 0.713 | 4383 | tags=50%, list=21%, signal=63% |
| GSE36476_CTRL_VS_TSST_ACT_72H_MEMORY_CD4_TCELL_OLI     | GSE36476_CTRL_VS_TSST_A  | 180 | -0.56492954 | -1.58223   | 0.07129095  | 0.21231484 | 0.79  | 5027 | tags=61%, list=20%, signal=79% |
| GSE1460_INTRATHYMIC_T_PROGENITOR_VS_CD4_THYMOCYTE      | GSE1460_INTRATHYMIC_T_P  | 175 | -0.37906244 | -1.4645612 | 0.07170542  | 0.23862366 | 0.919 | 3553 | tags=36%, list=17%, signal=43% |
| GSE24634_IL4_VS_CTRL_TREATED_NAIVE_CD4_TCELL_DAY7_UI   | GSE24634_IL4_VS_CTRL_TRE | 176 | -0.42815226 | -1.4662706 | 0.07171315  | 0.23843074 | 0.918 | 4919 | tags=47%, list=24%, signal=61% |
| GSE17721_CTRL_VS_GARDIQUIMOD_8H_BMDM_UP                | GSE17721_CTRL_VS_GARDIC  | 171 | -0.36480653 | -1.4626286 | 0.07231405  | 0.23638101 | 0.919 | 6280 | tags=46%, list=30%, signal=66% |
| GSE29617_CTRL_VS_DAY7_TIV_FLU_VACCINE_PBMCDN           | GSE29617_CTRL_VS_DAY7_T  | 152 | -0.47055584 | -1.5394342 | 0.072874494 | 0.20882219 | 0.845 | 5007 | tags=49%, list=24%, signal=64% |
| GSE10239_MEMORY_VS_DAY4.5_EFF_CD8_TCELL_DN             | GSE10239_MEMORY_VS_DAY   | 163 | -0.36833218 | -1.6591414 | 0.07335907  | 0.22234999 | 0.654 | 6751 | tags=44%, list=33%, signal=65% |
| GSE17974_0H_VS_48H_IN_VITRO_ACT_CD4_TCELL_DN           | GSE17974_0H_VS_48H_IN_VI | 156 | -0.45926264 | -1.558063  | 0.0734127   | 0.21746597 | 0.825 | 5471 | tags=51%, list=27%, signal=69% |
| GSE17721_POLYIC_VS_GARDIQUIMOD_16H_BMDM_DN             | GSE17721_POLYIC_VS_GAR   | 162 | -0.34239087 | -1.4845037 | 0.07377049  | 0.23098817 | 0.899 | 4089 | tags=40%, list=20%, signal=39% |
| GSE1460_INTRATHYMIC_T_PROGENITOR_VS_NAIVE_CD4_TCELL    | GSE1460_INTRATHYMIC_T_P  | 176 | -0.46765918 | -1.6003236 | 0.074074075 | 0.19992934 | 0.762 | 5189 | tags=51%, list=25%, signal=67% |
| GSE15930_NAIVE_VS_72H_IN_VITRO_STIM_IFNAB_CD8_TCELL_I  | GSE15930_NAIVE_VS_72H_IN | 166 | -0.44000694 | -1.540268  | 0.07429719  | 0.21490371 | 0.844 | 5805 | tags=52%, list=28%, signal=72% |
| GSE15750_DAY6_VS_DAY10_EFF_CD8_TCELL_UP                | GSE15750_DAY6_VS_DAY10   | 162 | -0.59432626 | -1.5407935 | 0.07436399  | 0.21585555 | 0.842 | 4831 | tags=65%, list=23%, signal=85% |
| GSE36392_EOSINOPHIL_VS_MAC_IL25_TREATED_LUNG_DN        | GSE36392_EOSINOPHIL_VS   | 148 | -0.37556887 | -1.5077802 | 0.07438017  | 0.22260508 | 0.883 | 5248 | tags=43%, list=25%, signal=57% |
| GSE12845_NAIVE_VS_DARKZONE_GC_TONSIL_BCELL_DN          | GSE12845_NAIVE_VS_DARKZ  | 164 | -0.4127831  | -1.6155714 | 0.07569721  | 0.20627294 | 0.733 | 5817 | tags=45%, list=28%, signal=62% |
| GSE17721_CTRL_VS_POLYIC_4H_BMDM_UP                     | GSE17721_CTRL_VS_POLYIC  | 158 | -0.32709816 | -1.4865098 | 0.0761523   | 0.23203053 | 0.898 | 6872 | tags=46%, list=33%, signal=69% |
| GSE17974_2.5H_VS_72H_IL4_AND_ANTI_IL12_ACT_CD4_TCELL_I | GSE17974_2.5H_VS_72H_IL4 | 163 | -0.42739034 | -1.4815813 | 0.07644628  | 0.23137332 | 0.9   | 4099 | tags=40%, list=20%, signal=49% |
| GSE3982_MAST_CELL_VS_TH2_DN                            | GSE3982_MAST_CELL_VS_TH  | 171 | -0.3731494  | -1.449777  | 0.076612905 | 0.24117738 | 0.927 | 4773 | tags=42%, list=23%, signal=54% |
| GSE12845_IGD_NEG_BLOOD_VS_DARKZONE_GC_TONSIL_BCEL      | GSE12845_IGD_NEG_BLOOD   | 166 | -0.28024882 | -1.4757023 | 0.07782101  | 0.2355734  | 0.907 | 5927 | tags=41%, list=29%, signal=57% |
| GSE36476_CTRL_VS_TSST_ACT_72H_MEMORY_CD4_TCELL_YO      | GSE36476_CTRL_VS_TSST_A  | 166 | -0.5587617  | -1.5225638 | 0.07874016  | 0.21347916 | 0.867 | 5181 | tags=66%, list=25%, signal=88% |
| GSE12845_IGD_POS_BLOOD_VS_PRE_GC_TONSIL_BCELL_DN       | GSE12845_IGD_POS_BLOOD   | 176 | -0.44224745 | -1.555362  | 0.079766534 | 0.21188475 | 0.827 | 5189 | tags=49%, list=25%, signal=65% |
| GSE31082_DN_VS_DP_THYMOCYTE_UP                         | GSE31082_DN_VS_DP_THYM   | 156 | -0.41224337 | -1.5856857 | 0.08008213  | 0.20887566 | 0.786 | 5133 | tags=39%, list=25%, signal=52% |
| GSE36476_CTRL_VS_TSST_ACT_40H_MEMORY_CD4_TCELL_OLI     | GSE36476_CTRL_VS_TSST_A  | 181 | -0.5439913  | -1.5439723 | 0.08203125  | 0.22076905 | 0.84  | 4900 | tags=62%, list=24%, signal=80% |
| GSE17721_0.5H_VS_4H_LPS_BMDM_UP                        | GSE17721_0.5H_VS_4H_LPS  | 166 | -0.29856277 | -1.4440364 | 0.08249497  | 0.24624496 | 0.93  | 6470 | tags=45%, list=31%, signal=64% |
| GSE24634_NAIVE_CD4_TCELL_VS_DAY3_IL4_CONV_TREG_DN      | GSE24634_NAIVE_CD4_TCEL  | 178 | -0.42580694 | -1.5591803 | 0.08251473  | 0.22255551 | 0.824 | 5505 | tags=51%, list=27%, signal=69% |
| GSE22886_NAIVE_CD4_TCELL_VS_12H_ACT_TH1_DN             | GSE22886_NAIVE_CD4_TCEL  | 179 | -0.40917215 | -1.5904999 | 0.08285164  | 0.20564091 | 0.777 | 6144 | tags=49%, list=30%, signal=69% |
| GSE36476_CTRL_VS_TSST_ACT_40H_MEMORY_CD4_TCELL_YO      | GSE36476_CTRL_VS_TSST_A  | 174 | -0.5499569  | -1.5310627 | 0.08300395  | 0.20698765 | 0.857 | 3337 | tags=48%, list=16%, signal=56% |
| GSE14000_4H_VS_16H_LPS_DC_DN                           | GSE14000_4H_VS_16H_LPS   | 138 | -0.34235656 | -1.4757992 | 0.08301158  | 0.23687653 | 0.907 | 6791 | tags=57%, list=33%, signal=85% |
| GSE17721_12H_VS_24H_LPS_BMDM_DN                        | GSE17721_12H_VS_24H_LPS  | 167 | -0.33568728 | -1.4687598 | 0.08316008  | 0.23726676 | 0.917 | 6553 | tags=50%, list=32%, signal=72% |
| GSE17721_POLYIC_VS_PAM3CSK4_1H_BMDM_UP                 | GSE17721_POLYIC_VS_PAM3  | 162 | -0.29264843 | -1.4625884 | 0.08351178  | 0.23511945 | 0.919 | 5650 | tags=38%, list=27%, signal=52% |
| GSE18791_CTRL_VS_NEWCASTLE_VIRUS_DC_14H_UP             | GSE18791_CTRL_VS_NEWCA   | 155 | -0.355357   | -1.4923714 | 0.083657585 | 0.23020415 | 0.895 | 6118 | tags=50%, list=30%, signal=71% |
| GSE22886_NAIVE_TCELL_VS_NEUTROPHIL_UP                  | GSE22886_NAIVE_TCELL_VS  | 168 | -0.34500527 | -1.6034435 | 0.08421053  | 0.20031632 | 0.758 | 6773 | tags=49%, list=33%, signal=72% |
| GSE34205_HEALTHY_VS_FLU_INF_INFANT_PBMCDN              | GSE34205_HEALTHY_VS_FLU  | 161 | -0.32743958 | -1.4967545 | 0.084980235 | 0.22756182 | 0.891 | 4264 | tags=21%, list=21%, signal=26% |
| GSE17721_CTRL_VS_POLYIC_8H_BMDM_UP                     | GSE17721_CTRL_VS_POLYIC  | 170 | -0.33736804 | -1.4450426 | 0.085192695 | 0.24597774 | 0.929 | 5378 | tags=41%, list=26%, signal=55% |
| GSE27786_ERYTHROBLAST_VS_NEUTROPHIL_DN                 | GSE27786_ERYTHROBLAST    | 165 | -0.2851474  | -1.4716842 | 0.08527132  | 0.23799817 | 0.91  | 6334 | tags=39%, list=31%, signal=56% |



|                                                        |                                                        |     |             |            |             |            |       |      |                                |
|--------------------------------------------------------|--------------------------------------------------------|-----|-------------|------------|-------------|------------|-------|------|--------------------------------|
| GSE22886_NAIVE_BCELL_VS_NEUTROPHIL_UP                  | GSE22886_NAIVE_BCELL_VS                                | 175 | -0.3202211  | -1.539774  | 0.086419754 | 0.21189837 | 0.844 | 3749 | tags=23%, list=18%, signal=28% |
| GSE3982_MEMORY_CD4_TCELL_VS_TH2_DN                     | GSE3982_MEMORY_CD4_TCELL_VS_TH2_DN                     | 180 | -0.42625263 | -1.52643   | 0.08678501  | 0.21081401 | 0.865 | 5060 | tags=49%, list=25%, signal=64% |
| GSE14000_UNSTIM_VS_4H_LPS_DC_TRANSLATED_RNA_UP         | GSE14000_UNSTIM_VS_4H_LPS_DC_TRANSLATED_RNA_UP         | 150 | -0.3429827  | -1.4847889 | 0.08761905  | 0.23350489 | 0.899 | 5279 | tags=41%, list=26%, signal=55% |
| GSE27786_ERYTHROBLAST_VS_MONO_MAC_DN                   | GSE27786_ERYTHROBLAST_VS_MONO_MAC_DN                   | 174 | -0.30015945 | -1.464338  | 0.089147285 | 0.23758791 | 0.919 | 5655 | tags=36%, list=27%, signal=49% |
| GSE12845_PRE_GC_VS_DARKZONE_GC_TONSIL_BCELL_DN         | GSE12845_PRE_GC_VS_DARKZONE_GC_TONSIL_BCELL_DN         | 158 | -0.34089196 | -1.4642359 | 0.08991228  | 0.23641758 | 0.919 | 6088 | tags=42%, list=30%, signal=59% |
| GSE12845_IGD_NEG_BLOOD_VS_NAIVE_TONSIL_BCELL_UP        | GSE12845_IGD_NEG_BLOOD_VS_NAIVE_TONSIL_BCELL_UP        | 168 | -0.38715097 | -1.537166  | 0.09147609  | 0.20396337 | 0.847 | 6352 | tags=51%, list=31%, signal=73% |
| GSE22886_NAIVE_CD4_TCELL_VS_MEMORY_TCELL_DN            | GSE22886_NAIVE_CD4_TCELL_VS_MEMORY_TCELL_DN            | 171 | -0.3230551  | -1.4706104 | 0.09289618  | 0.236837   | 0.914 | 6144 | tags=40%, list=30%, signal=56% |
| GSE7852_THYMUS_VS_FAT_TREG_UP                          | GSE7852_THYMUS_VS_FAT_TREG_UP                          | 158 | -0.3378549  | -1.5018071 | 0.09477756  | 0.22760436 | 0.886 | 4809 | tags=36%, list=23%, signal=47% |
| GSE22886_NAIVE_CD4_TCELL_VS_12H_ACT_TH2_DN             | GSE22886_NAIVE_CD4_TCELL_VS_12H_ACT_TH2_DN             | 173 | -0.37121168 | -1.5364945 | 0.09589041  | 0.20332985 | 0.847 | 6148 | tags=50%, list=30%, signal=71% |
| GSE24634_NAIVE_CD4_TCELL_VS_DAY7_IL4_CONV_TREG_DN      | GSE24634_NAIVE_CD4_TCELL_VS_DAY7_IL4_CONV_TREG_DN      | 183 | -0.45720866 | -1.5394574 | 0.09689923  | 0.21059898 | 0.845 | 5262 | tags=52%, list=26%, signal=69% |
| GSE17974_0H_VS_72H_IN_VITRO_ACT_CD4_TCELL_DN           | GSE17974_0H_VS_72H_IN_VITRO_ACT_CD4_TCELL_DN           | 168 | -0.39220625 | -1.5026778 | 0.09784736  | 0.22769846 | 0.885 | 5075 | tags=46%, list=25%, signal=61% |
| GSE18791_CTRL_VS_NEWCASTLE_VIRUS_DC_16H_UP             | GSE18791_CTRL_VS_NEWCASTLE_VIRUS_DC_16H_UP             | 157 | -0.37034336 | -1.4581182 | 0.1015625   | 0.23684959 | 0.924 | 5664 | tags=47%, list=27%, signal=65% |
| GSE1460_DP_THYMOCYTE_VS_NAIVE_CD4_TCELL_ADULT_BLOCK    | GSE1460_DP_THYMOCYTE_VS_NAIVE_CD4_TCELL_ADULT_BLOCK    | 162 | -0.37866932 | -1.4695052 | 0.10516252  | 0.23734581 | 0.915 | 4225 | tags=39%, list=21%, signal=49% |
| GSE17974_0.5H_VS_72H_IL4_AND_ANTI_IL12_ACT_CD4_TCELL_I | GSE17974_0.5H_VS_72H_IL4_AND_ANTI_IL12_ACT_CD4_TCELL_I | 163 | -0.42998612 | -1.4517604 | 0.10526316  | 0.24058487 | 0.927 | 6195 | tags=56%, list=30%, signal=80% |
| GSE13484_UNSTIM_VS_YF17D_VACCINE_STIM_PBMC_UP          | GSE13484_UNSTIM_VS_YF17D_VACCINE_STIM_PBMC_UP          | 166 | -0.27860063 | -1.5391469 | 0.10557769  | 0.20577794 | 0.845 | 5406 | tags=31%, list=26%, signal=42% |
| GSE13485_CTRL_VS_DAY1_YF17D_VACCINE_PBMC_UP            | GSE13485_CTRL_VS_DAY1_YF17D_VACCINE_PBMC_UP            | 153 | -0.34716514 | -1.5433664 | 0.11678832  | 0.21761687 | 0.84  | 4904 | tags=33%, list=24%, signal=43% |
| GSE15930_NAIVE_VS_72H_IN_VITRO_STIM_TRICHOSTATINA_CD   | GSE15930_NAIVE_VS_72H_IN_VITRO_STIM_TRICHOSTATINA_CD   | 163 | -0.39908856 | -1.4632155 | 0.119760476 | 0.23674777 | 0.919 | 4772 | tags=44%, list=23%, signal=57% |
| GSE3982_GENT_MEMORY_CD4_TCELL_VS_TH2_DN                | GSE3982_GENT_MEMORY_CD4_TCELL_VS_TH2_DN                | 178 | -0.39282236 | -1.4539226 | 0.121212125 | 0.23956718 | 0.926 | 5334 | tags=46%, list=26%, signal=62% |
| GSE22886_DAY1_VS_DAY7_MONOCYTE_IN_CULTURE_DN           | GSE22886_DAY1_VS_DAY7_MONOCYTE_IN_CULTURE_DN           | 178 | -0.3712957  | -1.458474  | 0.12190083  | 0.23761907 | 0.924 | 5279 | tags=43%, list=26%, signal=57% |
| GSE19825_NAIVE_VS_DAY3_EFF_CD8_TCELL_DN                | GSE19825_NAIVE_VS_DAY3_EFF_CD8_TCELL_DN                | 155 | -0.41858783 | -1.4653963 | 0.13742071  | 0.23855765 | 0.919 | 4076 | tags=41%, list=20%, signal=50% |

**Supplementary Table 8.** Direct comparison of up- and down-regulated genes between TCF3-ZNF384-positive and ZNF384-WT-ALL.

A) High expression genes in *TCF3-ZNF384*-positive ALL in comparison with *ZNF384*-WT ALL

# Notes : UP - FC ([TCF3-ZNF384] vs [B-others])

#Only up-regulated entities from parent entity list :

#Fold change >= 2.0

#Entity List : Moderated T-Test p (Corr) cut-off = 0.01

#Fold-Change cut-off :2.0

# Technology : Affymetrix.GeneChip.HG-U133\_Plus\_2

# Created On : Mon Aug 15 11:59:08 JST 2016

| Probe Set ID | Gene Symbol    | FC ([TCF3-ZNF384] vs [B-others]) | Log FC ([TCF3-ZNF384] vs [B-others]) | FC (abs) ([TCF3-ZNF384] vs [B-others]) | Regulation ([TCF3-ZNF384] vs [B-others]) | Alignments                                                                                        |
|--------------|----------------|----------------------------------|--------------------------------------|----------------------------------------|------------------------------------------|---------------------------------------------------------------------------------------------------|
| 215447_at    |                | 134.5215                         | 7.071693                             | 134.5215                               | up                                       | chr2:188391477-188393941 (-) // 85.71 // q32.1                                                    |
| 210665_at    | <i>TFPI</i>    | 103.630844                       | 6.6953096                            | 103.630844                             | up                                       | chr2:188343307-188419158 (-) // 94.74 // q32.1                                                    |
| 236501_at    |                | 91.57827                         | 6.5169334                            | 91.57827                               | up                                       | chr20:50399783-50400264 (+) // 100.0 // q13.2<br>chr14:104498392-104519002 (+) // 97.97 // q32.33 |
| 228285_at    | <i>TDRD9</i>   | 59.617485                        | 5.8976636                            | 59.617485                              | up                                       | chr2:188343307-188419158 (-) // 94.74 // q32.1                                                    |
| 210664_s_at  | <i>TFPI</i>    | 57.575268                        | 5.8473773                            | 57.575268                              | up                                       | chr16:65021365-65021908 (-) // 81.03 // q21                                                       |
| 239769_at    |                | 53.307304                        | 5.7362614                            | 53.307304                              | up                                       | chr20:53092229-53267708 (+) // 97.48 // q13.2                                                     |
| 214844_s_at  | <i>DOK5</i>    | 47.6779                          | 5.5752487                            | 47.6779                                | up                                       | chr11:67136401-67138578 (-) // 98.18 // q13.2                                                     |
| 1556385_at   |                | 47.079742                        | 5.5570345                            | 47.079742                              | up                                       | chr12:65179790-65272411 (+) // 97.45 // q14.3                                                     |
| 213912_at    | <i>TBC1D30</i> | 42.990864                        | 5.425958                             | 42.990864                              | up                                       | chr2:188328956-188330208 (-) // 77.08 // q32.1                                                    |
| 213258_at    | <i>TFPI</i>    | 42.086372                        | 5.3952813                            | 42.086372                              | up                                       | chr2:188331284-188419050 (-) // 99.02 // q32.1                                                    |
| 209676_at    | <i>TFPI</i>    | 40.574856                        | 5.342514                             | 40.574856                              | up                                       | chr10:8096669-8117213 (+) // 95.62 // p14                                                         |
| 209602_s_at  | <i>GATA3</i>   | 39.766846                        | 5.313494                             | 39.766846                              | up                                       | chr11:67135600-67136522 (-) // 94.62 // q13.2                                                     |
| 235525_at    |                | 36.92692                         | 5.206601                             | 36.92692                               | up                                       | chr16:65018599-65018968 (-) // 66.49 // q21                                                       |
| 241780_at    |                | 33.45491                         | 5.064146                             | 33.45491                               | up                                       | chr20:50400584-50419014 (-) // 99.04 // q13.2                                                     |
| 229661_at    | <i>SALL4</i>   | 32.84342                         | 5.0375323                            | 32.84342                               | up                                       | chr4:134070469-134074404 (+) // 96.01 // q28.3                                                    |
| 1552925_at   | <i>PCDH10</i>  | 29.877403                        | 4.900983                             | 29.877403                              | up                                       | chr2:188393901-188419076 (-) // 57.23 // q32.1                                                    |
| 214378_at    | <i>TFPI</i>    | 28.690434                        | 4.842498                             | 28.690434                              | up                                       | chr7:142419124-142419599 (+) // 100.0 // q34                                                      |
| 240766_at    |                | 28.526888                        | 4.8342505                            | 28.526888                              | up                                       | chr3:167780202-167782051 (-) // 64.79 // q26.2                                                    |
| 233877_at    |                | 28.269297                        | 4.821164                             | 28.269297                              | up                                       |                                                                                                   |

|             |                     |            |           |               |                                                |
|-------------|---------------------|------------|-----------|---------------|------------------------------------------------|
| 221555_x_at | <i>CDC14B</i>       | 26.287338  | 4.716296  | 26.287338 up  | chr9:99262396-99382112 (-) // 97.08 // q22.32  |
| 206135_at   | <i>ST18</i>         | 23.28339   | 4.5412292 | 23.28339 up   | chr8:53023398-53322303 (-) // 97.88 // q11.23  |
| 244507_at   |                     | 23.02185   | 4.524932  | 23.02185 up   |                                                |
| 213913_s_at | <i>TBC1D30</i>      | 21.821106  | 4.4476523 | 21.821106 up  | chr12:65179790-65272411 (+) // 97.45 // q14.3  |
| 210432_s_at | <i>SCN3A</i>        | 21.534586  | 4.4285836 | 21.534586 up  | chr2:165944039-166060553 (-) // 98.62 // q24.3 |
| 220568_at   | <i>PRO1483</i>      | 21.437685  | 4.422077  | 21.437685 up  | chr11:33894740-33896541 (-) // 86.74 // p13    |
| 235146_at   | <i>TMCC3</i>        | 20.056406  | 4.325991  | 20.056406 up  | chr12:94960882-94961956 (-) // 99.91 // q22    |
| 235691_at   | <i>LOC729970</i>    | 19.66864   | 4.2978253 | 19.66864 up   | chr1:95393930-95394773 (+) // 59.02 // p21.3   |
| 209603_at   | <i>GATA3</i>        | 19.072447  | 4.253418  | 19.072447 up  | chr10:8096669-8117213 (+) // 95.62 // p14      |
| 221556_at   | <i>CDC14B</i>       | 19.044275  | 4.2512856 | 19.044275 up  | chr9:99262396-99382112 (-) // 97.08 // q22.32  |
| 217963_s_at | <i>NGFRAP1</i>      | 18.43599   | 4.204453  | 18.43599 up   | chrX:102632108-102632999 (+) // 95.62 // q22.2 |
| 1559915_at  |                     | 18.298937  | 4.193688  | 18.298937 up  | chr7:2446140-2446701 (+) // 6.59 // p22.3      |
| 1553475_at  |                     | 18.264772  | 4.190992  | 18.264772 up  | chr11:33894740-33896541 (+) // 86.74 // p13    |
| 219500_at   | <i>CLCF1</i>        | 18.083607  | 4.1766105 | 18.083607 up  | chr11:67131640-67141055 (-) // 100.0 // q13.2  |
| 232555_at   | <i>CREB5</i>        | 17.808208  | 4.1544704 | 17.808208 up  | chr7:28764192-28765262 (+) // 79.19 // p15.1   |
| 234196_at   |                     | 17.309532  | 4.113495  | 17.309532 up  | chr12:95014382-95016612 (-) // 90.09 // q22    |
| 220003_at   | <i>LRRC36</i>       | 16.941257  | 4.082469  | 16.941257 up  | chr16:67381278-67419103 (+) // 93.98 // q22.1  |
| 1560031_at  | <i>FRMD4A</i>       | 16.394545  | 4.035144  | 16.394545 up  | chr10:13731567-13733805 (-) // 67.92 // p13    |
| 237277_at   |                     | 16.020012  | 4.0018034 | 16.020012 up  |                                                |
| 237483_at   |                     | 15.7023    | 3.972904  | 15.7023 up    | chr12:19404356-19404673 (+) // 9.85 // p12.3   |
| 234156_at   |                     | 15.62531   | 3.965813  | 15.62531 up   | chr11:12238448-12241075 (+) // 83.04 // p15.3  |
| 228293_at   | <i>DEPDC7</i>       | 15.558424  | 3.959624  | 15.558424 up  | chr11:33037408-33055126 (+) // 95.85 // p13    |
| 242447_at   | <i>C3orf70</i>      | 15.512522  | 3.9553614 | 15.512522 up  | chr3:184795840-184796292 (-) // 95.96 // q27.2 |
| 242493_at   | <i>PTPRD</i>        | 15.126643  | 3.91902   | 15.126643 up  | chr9:8527447-8528624 (-) // 95.93 // p24.1     |
| 209774_x_at | <i>CXCL2</i>        | 15.054162  | 3.9120905 | 15.054162 up  | chr4:74962800-74964892 (-) // 95.02 // q13.3   |
| 209604_s_at | <i>GATA3</i>        | 15.019701  | 3.9087842 | 15.019701 up  | chr10:8096772-8116487 (+) // 96.76 // p14      |
| 239606_at   |                     | 14.909752  | 3.8981843 | 14.909752 up  | chr6:10541666-10542364 (+) // 83.05 // p24.3   |
| 237409_at   |                     | 14.8552885 | 3.8929048 | 14.8552885 up | chr9:90150658-90151402 (+) // 98.26 // q21.33  |
| 234778_at   |                     | 14.764625  | 3.8840728 | 14.764625 up  | chr12:95014370-95016596 (+) // 90.62 // q22    |
| 205712_at   | <i>PTPRD</i>        | 14.587855  | 3.866696  | 14.587855 up  | chr9:8317267-9018737 (-) // 99.3 // p24.1      |
| 217975_at   | <i>WBP5</i>         | 14.435974  | 3.8515966 | 14.435974 up  | chrX:102611422-102613381 (+) // 56.07 // q22.2 |
| 239162_at   | <i>DAPK1-IT1</i>    | 14.338331  | 3.8418052 | 14.338331 up  | chr9:90168740-90169437 (+) // 92.39 // q21.33  |
| 238091_at   | <i>LOC100506388</i> | 14.185546  | 3.8263497 | 14.185546 up  | chr17:182843-183278 (+) // 48.18 // p13.3      |
| 230497_at   | <i>CELF5</i>        | 13.966964  | 3.8039465 | 13.966964 up  | chr19:3296523-3297035 (+) // 87.43 // p13.3    |

|              |                          |           |           |              |                                                 |
|--------------|--------------------------|-----------|-----------|--------------|-------------------------------------------------|
| 214043_at    | <i>PTPRD</i>             | 13.729832 | 3.779242  | 13.729832 up | chr9:8314246-8314734 (-) // 77.35 // p24.1      |
| 208475_at    | <i>FRMD4A</i>            | 13.716882 | 3.7778807 | 13.716882 up | chr10:13735702-14050532 (-) // 96.68 // p13     |
| 201445_at    | <i>CNN3</i>              | 13.701369 | 3.7762482 | 13.701369 up | chr1:95362765-95392638 (-) // 98.44 // p21.3    |
| 244665_at    |                          | 13.488259 | 3.7536323 | 13.488259 up | chr2:173305926-173306286 (+) // 27.22 // q31.1  |
| 215593_at    |                          | 13.288426 | 3.7320983 | 13.288426 up | chr6:10531892-10534033 (-) // 33.01 // p24.3    |
| 229228_at    | <i>CREB5///LOC401317</i> | 13.061163 | 3.7072115 | 13.061163 up | chr7:28865040-28865508 (+) // 95.12 // p14.3    |
| 244367_at    |                          | 13.033512 | 3.704154  | 13.033512 up | chr11:33893152-33894633 (-) // 56.32 // p13     |
| 226489_at    | <i>TMCC3</i>             | 12.95823  | 3.6957967 | 12.95823 up  | chr12:94962342-95009837 (-) // 92.75 // q22     |
| 244460_at    | <i>TMEM225</i>           | 12.808333 | 3.6790109 | 12.808333 up | chr11:123753632-123754038 (-) // 91.99 // q24.1 |
| 238002_at    | <i>GOLIM4</i>            | 12.753479 | 3.672819  | 12.753479 up | chr3:167726468-167727236 (-) // 89.82 // q26.2  |
| 208022_s_at  | <i>CDC14B</i>            | 12.338776 | 3.6251273 | 12.338776 up | chr9:99264867-99381660 (-) // 95.58 // q22.32   |
| 228297_at    |                          | 12.315354 | 3.6223862 | 12.315354 up | chr1:95362512-95362927 (+) // 88.38 // p21.3    |
| 238447_at    | <i>RBMS3</i>             | 12.196383 | 3.6083815 | 12.196383 up | chr3:30045651-30046619 (+) // 94.96 // p24.1    |
| 243767_at    |                          | 12.078255 | 3.59434   | 12.078255 up | chr7:30222405-30222724 (+) // 51.22 // p14.3    |
| 210258_at    | <i>RGS13</i>             | 12.010715 | 3.58625   | 12.010715 up | chr1:192605281-192629387 (+) // 95.09 // q31.2  |
| 232468_at    |                          | 11.877544 | 3.5701647 | 11.877544 up | chr10:13737200-13742668 (-) // 71.74 // p13     |
| 243274_x_at  |                          | 11.870347 | 3.5692902 | 11.870347 up | chr2:157170372-157170579 (-) // 96.28 // q24.1  |
| 207173_x_at  | <i>CDH11</i>             | 11.712424 | 3.5499678 | 11.712424 up | chr16:64980684-65155927 (-) // 99.67 // q21     |
| 1555336_a_at | <i>ITGA9</i>             | 11.695784 | 3.5479167 | 11.695784 up | chr3:37493605-37671009 (+) // 94.64 // p22.2    |
| 208476_s_at  | <i>FRMD4A</i>            | 11.493924 | 3.5227995 | 11.493924 up | chr10:13735702-14050532 (-) // 96.68 // p13     |
| 204324_s_at  | <i>GOLIM4</i>            | 11.391308 | 3.5098615 | 11.391308 up | chr3:167727653-167813086 (-) // 95.29 // q26.2  |
| 219735_s_at  | <i>TFCP2L1</i>           | 11.369567 | 3.5071054 | 11.369567 up | chr2:121978533-122042775 (-) // 66.37 // q14.2  |
| 213075_at    | <i>OLFML2A</i>           | 11.061708 | 3.4675024 | 11.061708 up | chr9:127575023-127577161 (+) // 50.92 // q33.3  |
| 238107_at    |                          | 10.990328 | 3.4581625 | 10.990328 up | chr7:5465598-5466031 (+) // 97.09 // p22.1      |
| 222348_at    | <i>MAST4</i>             | 10.981102 | 3.456951  | 10.981102 up | chr5:66438649-66439122 (+) // 58.2 // q12.3     |
| 203139_at    | <i>DAPK1</i>             | 10.955043 | 3.4535232 | 10.955043 up | chr9:90112795-90323543 (+) // 98.7 // q21.33    |
| 1561250_at   |                          | 10.777506 | 3.4299514 | 10.777506 up | chr7:28777533-28849191 (-) // 79.98 // p15.1    |
| 226499_at    | <i>NRARP</i>             | 10.667977 | 3.4152148 | 10.667977 up | chr9:140194101-140195761 (-) // 90.37 // q34.3  |
| 211214_s_at  | <i>DAPK1</i>             | 10.593329 | 3.4050841 | 10.593329 up | chr9:90112803-90260886 (+) // 88.99 // q21.33   |
| 227297_at    | <i>ITGA9</i>             | 10.526268 | 3.3959222 | 10.526268 up | chr3:37862525-37864996 (+) // 95.53 // p22.2    |
| 201069_at    | <i>MMP2</i>              | 10.476895 | 3.3891394 | 10.476895 up | chr16:55513102-55540151 (+) // 98.92 // q12.2   |
| 239361_at    |                          | 10.461701 | 3.3870456 | 10.461701 up | chr18:20808070-20808730 (+) // 96.37 // q11.2   |
| 241740_at    |                          | 10.371713 | 3.3745823 | 10.371713 up | chr10:35496578-35497343 (+) // 76.95 // p11.21  |
| 220881_at    |                          | 10.338687 | 3.369981  | 10.338687 up | chr11:33902188-33903327 (+) // 80.34 // p13     |

|              |                           |           |           |           |    |                                                 |
|--------------|---------------------------|-----------|-----------|-----------|----|-------------------------------------------------|
| 206363_at    | <i>MAF</i>                | 10.196707 | 3.3500314 | 10.196707 | up | chr16:79628234-79634611 (-) // 80.05 // q23.2   |
| 210997_at    | <i>HGF</i>                | 10.181316 | 3.3478522 | 10.181316 | up | chr7:81372006-81399362 (-) // 99.09 // q21.11   |
| 240704_at    |                           | 10.15807  | 3.3445544 | 10.15807  | up | chr4:38986125-38986684 (-) // 98.21 // p14      |
| 235362_at    | <i>LOC729970</i>          | 10.022763 | 3.3252084 | 10.022763 | up | chr1:95392965-95394114 (+) // 88.71 // p21.3    |
| 225817_at    | <i>CGNL1</i>              | 9.872391  | 3.3033996 | 9.872391  | up | chr15:57744336-57842915 (+) // 85.99 // q21.3   |
| 1569599_at   | <i>SAMSN1</i>             | 9.865503  | 3.3023927 | 9.865503  | up | chr21:15917482-15918636 (-) // 97.13 // q11.2   |
| 236179_at    | <i>CDH11</i>              | 9.753492  | 3.285919  | 9.753492  | up | chr16:64979130-64979629 (-) // 78.04 // q21     |
| 201656_at    | <i>ITGA6</i>              | 9.701496  | 3.2782073 | 9.701496  | up | chr2:173292369-173371002 (+) // 99.04 // q31.1  |
| 212062_at    | <i>ATP9A</i>              | 9.600982  | 3.263182  | 9.600982  | up | chr20:50213053-50384867 (-) // 98.9 // q13.2    |
| 243041_s_at  |                           | 9.548814  | 3.2553215 | 9.548814  | up | chr3:30045699-30046192 (-) // 95.36 // p24.1    |
| 230788_at    | <i>GCNT2</i>              | 9.542816  | 3.254415  | 9.542816  | up | chr6:10629228-10629600 (+) // 71.73 // p24.2    |
| 219054_at    | <i>NPR3</i>               | 9.488024  | 3.2461076 | 9.488024  | up | chr5:32789180-32791823 (+) // 99.89 // p13.3    |
| 216834_at    | <i>RGS1</i>               | 9.451391  | 3.2405267 | 9.451391  | up | chr1:192544936-192549152 (+) // 91.99 // q31.2  |
| 236571_at    |                           | 9.404325  | 3.2333243 | 9.404325  | up | chr12:8081182-8081891 (-) // 80.14 // p13.31    |
| 213362_at    | <i>PTPRD</i>              | 9.367283  | 3.2276306 | 9.367283  | up | chr9:8314915-8317287 (-) // 92.75 // p24.1      |
| 235350_at    | <i>C4orf19</i>            | 9.356331  | 3.2259429 | 9.356331  | up | chr4:37594314-37595143 (+) // 44.03 // p14      |
| 228568_at    | <i>GCOM1///MYZAP</i>      | 9.303668  | 3.2177997 | 9.303668  | up | chr15:57922013-57977558 (+) // 98.6 // q21.3    |
| 1569289_at   | <i>BIVM</i>               | 9.150287  | 3.193817  | 9.150287  | up | chr13:103459876-103469565 (+) // 70.49 // q33.1 |
| 242836_at    |                           | 9.059044  | 3.1793587 | 9.059044  | up | chr3:141610954-141611493 (+) // 34.04 // q23    |
| 227379_at    | <i>MBOAT1</i>             | 8.985781  | 3.1676438 | 8.985781  | up | chr6:20100947-20144187 (-) // 73.78 // p22.3    |
| 215572_at    |                           | 8.956028  | 3.162859  | 8.956028  | up | chr15:79028393-79029441 (+) // 85.9 // q25.1    |
| 228635_at    | <i>PCDH10</i>             | 8.9513235 | 3.162101  | 8.9513235 | up | chr4:134070469-134112730 (+) // 96.03 // q28.3  |
| 230505_at    | <i>LOC145474</i>          | 8.936246  | 3.159669  | 8.936246  | up | chr14:71954577-71956418 (+) // 86.05 // q24.2   |
| 220439_at    | <i>RIN3</i>               | 8.911454  | 3.1556609 | 8.911454  | up | chr14:92980124-93123712 (+) // 63.54 // q32.12  |
| 234112_at    |                           | 8.866144  | 3.1483068 | 8.866144  | up | chr3:105524146-105525355 (+) // 68.8 // q13.11  |
| 205419_at    | <i>GPR183</i>             | 8.858022  | 3.1469846 | 8.858022  | up | chr13:99946795-99948417 (-) // 96.96 // q32.3   |
| 207056_s_at  | <i>SLC4A8</i>             | 8.851332  | 3.1458945 | 8.851332  | up | chr12:51818756-51891648 (+) // 96.64 // q13.13  |
| 1558680_s_at | <i>PDE1A</i>              | 8.799451  | 3.1374135 | 8.799451  | up | chr2:183088589-183106787 (-) // 95.16 // q32.1  |
| 232512_at    | <i>AC013463.2///OTTHI</i> | 8.793435  | 3.136427  | 8.793435  | up | chr2:165944037-165950976 (+) // 98.66 // q24.3  |
| 1566324_a_at | <i>MAF</i>                | 8.644528  | 3.1117873 | 8.644528  | up | chr16:79629404-79629760 (-) // 99.44 // q23.2   |
| 215177_s_at  | <i>ITGA6</i>              | 8.615036  | 3.1068568 | 8.615036  | up | chr2:173355948-173369965 (+) // 94.77 // q31.1  |
| 219789_at    | <i>NPR3</i>               | 8.527283  | 3.092086  | 8.527283  | up | chr5:32711539-32787428 (+) // 96.43 // p13.3    |
| 214156_at    | <i>MYRIP</i>              | 8.47019   | 3.0823944 | 8.47019   | up | chr3:40285936-40301809 (+) // 91.64 // p22.1    |
| 233614_at    |                           | 8.435729  | 3.0765128 | 8.435729  | up | chr3:105499524-105503015 (-) // 78.12 // q13.11 |



|              |                          |           |           |              |                                                |
|--------------|--------------------------|-----------|-----------|--------------|------------------------------------------------|
| 235739_at    |                          | 8.341363  | 3.0602832 | 8.341363 up  | chr2:157185089-157185685 (-) // 93.62 // q24.1 |
| 225275_at    | <i>EDIL3</i>             | 8.29552   | 3.0523324 | 8.29552 up   | chr5:83236372-83238956 (-) // 99.23 // q14.3   |
| 207315_at    | <i>CD226</i>             | 8.195964  | 3.0349135 | 8.195964 up  | chr18:67530194-67624160 (-) // 89.13 // q22.2  |
| 209191_at    | <i>TUBB6</i>             | 8.181312  | 3.0323322 | 8.181312 up  | chr18:12308256-12326567 (+) // 98.43 // p11.21 |
| 229623_at    |                          | 8.181063  | 3.0322883 | 8.181063 up  | chr4:83403975-83404959 (-) // 57.14 // q21.22  |
| 1567008_at   |                          | 8.149859  | 3.0267751 | 8.149859 up  | chr16:75076350-75076898 (+) // 41.61 // q23.1  |
| 234153_at    |                          | 8.134343  | 3.024026  | 8.134343 up  | chr6:158476761-158478597 (-) // 87.6 // q25.3  |
| 230101_at    | <i>CXCL2</i>             | 8.126075  | 3.0225587 | 8.126075 up  | chr4:74963109-74964895 (+) // 85.11 // q13.3   |
| 225611_at    | <i>MAST4</i>             | 8.107037  | 3.0191746 | 8.107037 up  | chr5:66463019-66465908 (+) // 94.5 // q12.3    |
| 227481_at    | <i>CNKSR3</i>            | 8.101008  | 3.0181015 | 8.101008 up  | chr6:154726322-154727312 (-) // 97.31 // q25.2 |
| 243925_at    |                          | 8.095956  | 3.0172014 | 8.095956 up  | chr1:176180319-176180802 (+) // 69.57 // q25.2 |
| 238181_at    |                          | 8.053693  | 3.0096505 | 8.053693 up  | chr1:192618521-192619174 (+) // 33.47 // q31.2 |
| 243993_at    |                          | 8.045776  | 3.0082316 | 8.045776 up  | chr12:96752770-96753212 (-) // 76.33 // q23.1  |
| 1559916_a_at |                          | 7.991224  | 2.9984164 | 7.991224 up  | chr7:2446140-2446701 (+) // 6.59 // p22.3      |
| 227425_at    | <i>REPS2</i>             | 7.98468   | 2.9972346 | 7.98468 up   | chrX:17169413-17171395 (+) // 97.54 // p22.13  |
| 230381_at    | <i>C1orf186</i>          | 7.982301  | 2.9968047 | 7.982301 up  | chr1:206238871-206239376 (-) // 74.43 // q32.1 |
| 210755_at    | <i>HGF</i>               | 7.8624225 | 2.974974  | 7.8624225 up | chr7:81380204-81399341 (-) // 99.84 // q21.11  |
| 225167_at    | <i>FRMD4A</i>            | 7.8613143 | 2.9747705 | 7.8613143 up | chr10:13685705-14372883 (-) // 98.26 // p13    |
| 1568768_s_at | <i>BRE-AS1</i>           | 7.7442536 | 2.9531262 | 7.7442536 up | chr2:28112513-28113955 (-) // 91.42 // p23.2   |
| 242216_at    |                          | 7.712897  | 2.9472728 | 7.712897 up  | chr10:22201914-22202368 (-) // 99.34 // p12.31 |
| 238120_at    | <i>RPH3AL</i>            | 7.704033  | 2.9456139 | 7.704033 up  | chr17:198357-202557 (-) // 97.37 // p13.3      |
| 233127_at    |                          | 7.6999407 | 2.9448473 | 7.6999407 up | chr19:54055002-54056546 (+) // 63.48 // q13.42 |
| 205931_s_at  | <i>CREB5///LOC40131;</i> | 7.654021  | 2.9362178 | 7.654021 up  | chr7:28475233-28859617 (+) // 92.63 // p15.1   |
| 236511_at    |                          | 7.643244  | 2.934185  | 7.643244 up  | chr12:12647709-12648170 (+) // 46.33 // p13.2  |
| 231387_at    | <i>PXDC1</i>             | 7.628438  | 2.9313877 | 7.628438 up  | chr6:3722433-3723316 (+) // 92.93 // p25.2     |
| 1567009_at   |                          | 7.608802  | 2.9276693 | 7.608802 up  | chr16:75076360-75076898 (-) // 41.61 // q23.1  |
| 224098_at    |                          | 7.6074224 | 2.9274077 | 7.6074224 up |                                                |
| 239701_at    |                          | 7.605142  | 2.9269753 | 7.605142 up  | chr10:97542878-97543467 (+) // 95.36 // q24.1  |
| 1570361_a_at |                          | 7.5938544 | 2.9248323 | 7.5938544 up | chr22:28857442-28857930 (-) // 40.57 // q12.1  |
| 1554863_s_at | <i>DOK5</i>              | 7.5407295 | 2.914704  | 7.5407295 up | chr20:53092256-53267428 (+) // 93.41 // q13.2  |
| 1563621_at   |                          | 7.5144176 | 2.9096613 | 7.5144176 up | chr7:36279036-36282376 (+) // 42.05 // p14.2   |
| 236226_at    | <i>BTLA</i>              | 7.458586  | 2.8989022 | 7.458586 up  | chr3:112184772-112185231 (-) // 98.28 // q13.2 |
| 225168_at    | <i>FRMD4A</i>            | 7.422247  | 2.891856  | 7.422247 up  | chr10:13685705-14372883 (-) // 98.26 // p13    |
| 242571_at    | <i>REPS2</i>             | 7.407908  | 2.8890662 | 7.407908 up  | chrX:17168684-17169584 (+) // 79.42 // p22.13  |

|              |                           |           |           |              |                                                 |
|--------------|---------------------------|-----------|-----------|--------------|-------------------------------------------------|
| 241844_x_at  | <i>TMEM156</i>            | 7.3759856 | 2.8828359 | 7.3759856 up | chr4:39029997-39034003 (-) // 55.15 // p14      |
| 207172_s_at  | <i>CDH11</i>              | 7.366438  | 2.8809671 | 7.366438 up  | chr16:64981425-65038926 (-) // 99.89 // q21     |
| 242021_at    | <i>XBP1</i>               | 7.360762  | 2.8798552 | 7.360762 up  | chr22:28795019-28795445 (-) // 54.03 // q12.1   |
| 1568752_s_at | <i>RGS13</i>              | 7.3307304 | 2.873957  | 7.3307304 up | chr1:192613660-192628992 (+) // 78.26 // q31.2  |
| 238372_s_at  |                           | 7.3186994 | 2.8715873 | 7.3186994 up | chr12:15936271-15936681 (-) // 62.03 // p12.3   |
| 206009_at    | <i>ITGA9</i>              | 7.276326  | 2.8632102 | 7.276326 up  | chr3:37493812-37860937 (+) // 99.41 // p22.2    |
| 230536_at    | <i>PBX4</i>               | 7.2627544 | 2.8605168 | 7.2627544 up | chr19:19672523-19729374 (-) // 94.64 // p13.11  |
| 208109_s_at  | <i>LINC00597</i>          | 7.2624793 | 2.8604622 | 7.2624793 up | chr15:77516251-77517746 (-) // 70.64 // q24.3   |
| 202988_s_at  | <i>RGS1</i>               | 7.2308216 | 2.8541596 | 7.2308216 up | chr1:192544950-192549071 (+) // 96.74 // q31.2  |
| 240498_at    |                           | 7.222939  | 2.852586  | 7.222939 up  | chr12:11897312-11897844 (+) // 54.51 // p13.2   |
| 1559420_x_at | <i>CACNB2</i>             | 7.221742  | 2.852347  | 7.221742 up  | chr10:18809511-18925801 (+) // 41.24 // p12.31  |
| 235570_at    | <i>RBMS3</i>              | 7.2010317 | 2.8482037 | 7.2010317 up | chr3:30050779-30051877 (+) // 94.62 // p24.1    |
| 205011_at    | <i>VWA5A</i>              | 7.182559  | 2.844498  | 7.182559 up  | chr11:123988214-124017609 (+) // 98.25 // q24.2 |
| 229789_at    | <i>TIGD3</i>              | 7.114974  | 2.8308585 | 7.114974 up  | chr11:65122289-65125080 (+) // 99.34 // q13.1   |
| 214375_at    | <i>PPFIBP1</i>            | 7.063016  | 2.8202844 | 7.063016 up  | chr12:27787909-27801069 (+) // 99.68 // p11.23  |
| 232914_s_at  | <i>SYTL2</i>              | 7.0318685 | 2.813908  | 7.0318685 up | chr11:85405326-85522178 (-) // 99.08 // q14.1   |
| 1554438_at   | <i>KIAA1217</i>           | 7.0295887 | 2.8134403 | 7.0295887 up | chr10:24738588-24834197 (+) // 99.09 // p12.1   |
| 213058_at    | <i>TTC28</i>              | 7.008034  | 2.8090098 | 7.008034 up  | chr22:28374003-28386064 (-) // 91.41 // q12.1   |
| 244753_at    |                           | 6.992686  | 2.8058467 | 6.992686 up  | chr19:39143706-39144096 (+) // 57.4 // q13.2    |
| 236787_at    | <i>AC017002.1///OTTHI</i> | 6.969574  | 2.8010705 | 6.969574 up  | chr2:87739042-87758459 (-) // 34.78 // p11.2    |
| 220637_at    | <i>FAM124B</i>            | 6.9243855 | 2.791686  | 6.9243855 up | chr2:225243415-225266751 (-) // 97.9 // q36.2   |
| 1552552_s_at | <i>CLEC4C</i>             | 6.9221616 | 2.7912226 | 6.9221616 up | chr12:7882040-7900074 (-) // 68.92 // p13.31    |
| 209348_s_at  | <i>MAF</i>                | 6.8630567 | 2.7788513 | 6.8630567 up | chr16:79630369-79634611 (-) // 87.31 // q23.2   |
| 238458_at    | <i>MICU3</i>              | 6.8319926 | 2.7723064 | 6.8319926 up | chr8:16978951-16980145 (+) // 95.27 // p22      |
| 220330_s_at  | <i>SAMSN1</i>             | 6.8179507 | 2.7693381 | 6.8179507 up | chr21:15857548-15918664 (-) // 98.52 // q11.2   |
| 208450_at    | <i>LGALS2</i>             | 6.7581058 | 2.756619  | 6.7581058 up | chr22:37966265-37975938 (-) // 100.0 // q13.1   |
| 1566323_at   | <i>MAF</i>                | 6.7288146 | 2.7503524 | 6.7288146 up | chr16:79629404-79629760 (+) // 99.44 // q23.2   |
| 220952_s_at  | <i>PLEKHA5</i>            | 6.720028  | 2.7484672 | 6.720028 up  | chr12:19475451-19529331 (+) // 97.25 // p12.3   |
| 232231_at    | <i>RUNX2</i>              | 6.7193694 | 2.7483258 | 6.7193694 up | chr6:45515256-45518818 (+) // 70.84 // p21.1    |
| 1568574_x_at | <i>SPP1</i>               | 6.7049046 | 2.7452168 | 6.7049046 up | chr4:88902881-88902950 (-) // 66.99 // q22.1    |
| 216248_s_at  | <i>NR4A2</i>              | 6.68299   | 2.7404938 | 6.68299 up   | chr2:157180968-157189041 (-) // 97.76 // q24.1  |
| 215146_s_at  | <i>TTC28</i>              | 6.6695232 | 2.7375836 | 6.6695232 up | chr22:28377255-28501665 (-) // 99.76 // q12.1   |
| 228188_at    | <i>FOSL2</i>              | 6.61836   | 2.7264738 | 6.61836 up   | chr2:28637749-28640177 (+) // 91.09 // p23.2    |
| 239938_x_at  |                           | 6.5614104 | 2.714006  | 6.5614104 up | chr5:88030415-88030815 (-) // 95.69 // q14.3    |

|              |                         |           |           |              |                                                                                                                                                  |
|--------------|-------------------------|-----------|-----------|--------------|--------------------------------------------------------------------------------------------------------------------------------------------------|
| 1561167_at   |                         | 6.517225  | 2.7042577 | 6.517225 up  | chr12:11867256-11867584 (+) // 94.49 // p13.2<br>chr2:87749173-87758508 (+) // 38.1 //<br>p11.2//chr2:112249106-112258448 (-) // 38.35 //<br>q13 |
| 1562056_at   | <i>AC017002.2//OTTH</i> | 6.495262  | 2.6993878 | 6.495262 up  | chr12:12634500-12636900 (+) // 62.69 // p13.2                                                                                                    |
| 1558739_at   |                         | 6.4509187 | 2.6895046 | 6.4509187 up | chr10:13689748-13691669 (-) // 79.6 // p13                                                                                                       |
| 232473_at    |                         | 6.4374065 | 2.6864796 | 6.4374065 up | chr5:66463019-66465908 (+) // 94.5 // q12.3                                                                                                      |
| 225613_at    | <i>MAST4</i>            | 6.378362  | 2.673186  | 6.378362 up  | chr1:197574628-197627480 (-) // 99.16 // q31.3                                                                                                   |
| 1564164_at   | <i>DENND1B</i>          | 6.3661785 | 2.6704276 | 6.3661785 up | chr18:2787843-2788250 (+) // 86.57 // p11.32                                                                                                     |
| 237588_at    |                         | 6.3622565 | 2.6695385 | 6.3622565 up | chrX:153533569-153558700 (+) // 98.72 // q28                                                                                                     |
| 214183_s_at  | <i>TKTL1</i>            | 6.328458  | 2.661854  | 6.328458 up  | chr10:70849686-70850424 (-) // 60.32 // q22.1                                                                                                    |
| 241279_at    |                         | 6.326588  | 2.6614277 | 6.326588 up  | chr2:28637668-28639558 (+) // 81.76 // p23.2                                                                                                     |
| 225262_at    | <i>FOSL2</i>            | 6.2895756 | 2.6529627 | 6.2895756 up | chr9:71864345-71864661 (+) // 95.74 // q21.11                                                                                                    |
| 237132_at    | <i>TJP2</i>             | 6.277643  | 2.650223  | 6.277643 up  | chr12:15936271-15936681 (+) // 62.03 // p12.3                                                                                                    |
| 238371_s_at  |                         | 6.271658  | 2.6488469 | 6.271658 up  | chr5:179435008-179435435 (-) // 15.12 // q35.3                                                                                                   |
| 239886_at    |                         | 6.271123  | 2.6487238 | 6.271123 up  | chr18:2847618-2892288 (+) // 96.34 // p11.32                                                                                                     |
| 242288_s_at  | <i>EMILIN2</i>          | 6.26284   | 2.646817  | 6.26284 up   | chr15:80987491-81047960 (+) // 85.5 // q25.1                                                                                                     |
| 225436_at    | <i>ABHD17C</i>          | 6.2410746 | 2.6417944 | 6.2410746 up | chr21:15857954-15918662 (-) // 96.93 // q11.2                                                                                                    |
| 1555638_a_at | <i>SAMSN1</i>           | 6.234443  | 2.6402607 | 6.234443 up  | chr10:70847862-70848929 (+) // 91.65 // q22.1                                                                                                    |
| 1554676_at   | <i>SRGN</i>             | 6.1729727 | 2.6259654 | 6.1729727 up | chr12:51745656-51746252 (-) // 73.65 // q13.13                                                                                                   |
| 228303_at    | <i>GALNT6</i>           | 6.1674366 | 2.624671  | 6.1674366 up | chr6:22146815-22147245 (-) // 93.75 // p22.3                                                                                                     |
| 241670_x_at  | <i>LOC729177</i>        | 6.155203  | 2.6218064 | 6.155203 up  | chr19:39155209-39158346 (+) // 90.53 // q13.2                                                                                                    |
| 232058_at    |                         | 6.1501727 | 2.620627  | 6.1501727 up | chr20:50254276-50256695 (-) // 51.59 // q13.2                                                                                                    |
| 216129_at    | <i>ATP9A</i>            | 6.141106  | 2.6184986 | 6.141106 up  | chr7:130756033-130757545 (-) // 43.78 // q32.3                                                                                                   |
| 215330_at    |                         | 6.13668   | 2.6174583 | 6.13668 up   | chr10:114830800-114833452 (+) // 58.61 // q25.2                                                                                                  |
| 206548_at    |                         | 6.119925  | 2.613514  | 6.119925 up  | chr13:103493722-103493883 (-) // 58.97 // q33.1                                                                                                  |
| 229589_x_at  | <i>BIVM</i>             | 6.098476  | 2.6084487 | 6.098476 up  | chr9:132684015-132684414 (-) // 55.73 // q34.11                                                                                                  |
| 239453_at    |                         | 6.09776   | 2.6082795 | 6.09776 up   | chr2:157180950-157189183 (-) // 98.45 // q24.1                                                                                                   |
| 204622_x_at  | <i>NR4A2</i>            | 6.087553  | 2.6058624 | 6.087553 up  | chr5:66409933-66463092 (+) // 98.21 // q12.3                                                                                                     |
| 40016_g_at   | <i>MAST4</i>            | 6.0626817 | 2.599956  | 6.0626817 up | chr4:37592331-37687998 (-) // 89.49 // p14                                                                                                       |
| 1554714_at   | <i>RELL1</i>            | 6.045805  | 2.5959344 | 6.045805 up  | chr6:3722852-3751780 (-) // 96.22 // p25.2                                                                                                       |
| 212923_s_at  | <i>PXDC1</i>            | 6.031024  | 2.592403  | 6.031024 up  | chr9:27374230-27378942 (-) // 65.85 // p21.2                                                                                                     |
| 1563521_at   | <i>MOB3B</i>            | 6.0213637 | 2.5900903 | 6.0213637 up | chr8:106690791-106691741 (+) // 59.37 // q23.1                                                                                                   |
| 242699_at    | <i>OTTHUMG00000164</i>  | 6.0162554 | 2.5888658 | 6.0162554 up | chr2:197712199-197791454 (-) // 98.69 // q33.1                                                                                                   |
| 220576_at    | <i>PGAP1</i>            | 5.994263  | 2.5835824 | 5.994263 up  |                                                                                                                                                  |

|              |                |           |           |              |                                                 |
|--------------|----------------|-----------|-----------|--------------|-------------------------------------------------|
| 241590_at    |                | 5.9923563 | 2.5831234 | 5.9923563 up | chr5:179464022-179464377 (-) // 37.36 // q35.3  |
| 214933_at    | <i>CACNA1A</i> | 5.989319  | 2.582392  | 5.989319 up  | chr19:13317255-13368214 (-) // 96.36 // p13.2   |
|              |                |           |           |              | chr16:28655910-28669004 (+) // 89.08 //         |
|              |                |           |           |              | p11.2///chr16:28770024-28783129 (+) // 89.08 // |
|              |                |           |           |              | p11.2///chr16:29049975-29063048 (+) // 88.94 // |
|              |                |           |           |              | p11.2///chr16:74411871-74424944 (+) // 88.81 // |
|              |                |           |           |              | q23.1///chr16:22538886-22544602 (+) // 83.51 // |
|              |                |           |           |              | p12.2///chr16:28468691-28481759 (-) // 89.21 // |
|              |                |           |           |              | p11.2///chr16:28354853-28367922 (-) // 89.15 // |
|              |                |           |           |              | p11.2///chr16:29395954-29401669 (-) // 83.79 // |
|              |                |           |           |              | p11.2///chr16:29497498-29503195 (-) // 83.72 // |
|              |                |           |           |              | p11.2///chr16:21416958-21422662 (-) // 83.58 // |
|              |                |           |           |              | p12.2///chr16:30237468-30243168 (-) // 83.58 // |
|              |                |           |           |              | p11.2///chr16:21849409-21855114 (-) // 83.51 // |
|              |                |           |           |              | p12.2///chr16:12022080-12027780 (-) // 82.84 // |
|              |                |           |           |              | p13.13                                          |
| 215921_at    | <i>NPIP3</i>   | 5.971572  | 2.5781107 | 5.971572 up  | chr2:197699064-197699967 (-) // 96.69 // q33.1  |
| 241801_at    | <i>PGAP1</i>   | 5.9531813 | 2.5736609 | 5.9531813 up | chr5:180487889-180488521 (+) // 6.05 // q35.3   |
| 228434_at    | <i>BTNL9</i>   | 5.9525557 | 2.5735092 | 5.9525557 up | chr14:71932726-71933297 (+) // 78.71 // q24.2   |
| 239600_at    |                | 5.930485  | 2.56815   | 5.930485 up  | chr12:12634500-12636900 (+) // 62.69 // p13.2   |
| 1558740_s_at |                | 5.901341  | 2.5610428 | 5.901341 up  | chr4:25757546-25758534 (-) // 72.59 // p15.2    |
| 235353_at    | <i>SEL1L3</i>  | 5.8857827 | 2.5572343 | 5.8857827 up | chr1:206940947-206945810 (-) // 77.51 // q32.1  |
| 207433_at    | <i>IL10</i>    | 5.851818  | 2.5488849 | 5.851818 up  | chr16:79631220-79632352 (+) // 94.61 // q23.2   |
| 229327_s_at  |                | 5.795855  | 2.5350215 | 5.795855 up  |                                                 |
| 1560909_x_at |                | 5.7873206 | 2.5328956 | 5.7873206 up |                                                 |
| 1563975_at   | <i>RNF130</i>  | 5.7805915 | 2.531217  | 5.7805915 up | chr5:179421666-179422621 (-) // 7.03 // q35.3   |
| 231079_at    |                | 5.7746544 | 2.5297346 | 5.7746544 up | chr12:8058208-8058708 (+) // 96.25 // p13.31    |
| 222896_at    | <i>TMEM38A</i> | 5.7578144 | 2.5255213 | 5.7578144 up | chr19:16771937-16800832 (+) // 74.9 // p13.11   |
| 240657_at    |                | 5.74674   | 2.5227437 | 5.74674 up   | chr10:17771929-17772331 (+) // 78.08 // p12.33  |
| 220813_at    | <i>CYSLTR2</i> | 5.726741  | 2.5177143 | 5.726741 up  | chr13:49280690-49283498 (+) // 91.77 // q14.2   |
| 241141_at    | <i>BMP6</i>    | 5.717254  | 2.5153224 | 5.717254 up  | chr6:7879878-7880454 (-) // 58.03 // p24.3      |
| 220591_s_at  | <i>EFHC2</i>   | 5.7165484 | 2.5151443 | 5.7165484 up | chrX:44007962-44202911 (-) // 98.87 // p11.3    |
| 241673_x_at  |                | 5.715002  | 2.514754  | 5.715002 up  | chr7:33691265-33691402 (-) // 25.89 // p14.3    |
| 204179_at    | <i>MB</i>      | 5.711658  | 2.5139096 | 5.711658 up  | chr22:36002811-36013374 (-) // 99.81 // q12.3   |
| 219457_s_at  | <i>RIN3</i>    | 5.680209  | 2.505944  | 5.680209 up  | chr14:93118793-93155338 (+) // 99.22 // q32.12  |

|              |                          |           |           |              |                                                |
|--------------|--------------------------|-----------|-----------|--------------|------------------------------------------------|
| 226982_at    | <i>ELL2</i>              | 5.672694  | 2.504034  | 5.672694 up  | chr5:95220803-95222242 (-) // 97.56 // q15     |
| 244026_at    |                          | 5.668037  | 2.502849  | 5.668037 up  | chr5:95269512-95269993 (-) // 98.57 // q15     |
| 1554474_a_at | <i>MOXD1</i>             | 5.6640215 | 2.5018268 | 5.6640215 up | chr6:132618040-132722684 (-) // 97.2 // q23.2  |
| 36711_at     | <i>MAFF</i>              | 5.6635847 | 2.5017154 | 5.6635847 up | chr22:38609860-38612514 (+) // 77.19 // q13.1  |
| 237860_at    | <i>RBMS3</i>             | 5.656842  | 2.499997  | 5.656842 up  | chr3:30046860-30047462 (-) // 99.67 // p24.1   |
| 241824_at    |                          | 5.648375  | 2.4978359 | 5.648375 up  | chr2:28619664-28620095 (+) // 81.86 // p23.2   |
| 228585_at    | <i>ENTPD1</i>            | 5.630978  | 2.4933856 | 5.630978 up  | chr10:97636304-97637022 (+) // 82.67 // q24.1  |
| 1557811_a_at |                          | 5.622259  | 2.49115   | 5.622259 up  | chr16:23947925-23948344 (-) // 25.38 // p12.2  |
| 1555335_at   | <i>ITGA9</i>             | 5.6212935 | 2.4909022 | 5.6212935 up | chr3:37493605-37671009 (+) // 94.64 // p22.2   |
| 1566965_at   |                          | 5.6097536 | 2.4879375 | 5.6097536 up | chr1:97594625-97595338 (+) // 58.26 // p21.3   |
| 1560443_at   |                          | 5.5732403 | 2.4785163 | 5.5732403 up | chr18:2778279-2780236 (+) // 39.72 // p11.32   |
| 1568190_at   |                          | 5.5509768 | 2.4727416 | 5.5509768 up |                                                |
| 233479_at    |                          | 5.5428896 | 2.4706383 | 5.5428896 up | chr2:197714179-197716887 (-) // 42.4 // q33.1  |
| 237459_at    |                          | 5.5423427 | 2.470496  | 5.5423427 up | chr12:96725255-96725738 (-) // 87.4 // q23.1   |
| 239901_at    |                          | 5.5174227 | 2.4639945 | 5.5174227 up | chr7:130782012-130782621 (-) // 75.22 // q32.3 |
| 1562469_at   | <i>LINC00340</i>         | 5.5132008 | 2.4628901 | 5.5132008 up | chr6:21845660-21982551 (+) // 62.36 // p22.3   |
| 224215_s_at  | <i>DLL1</i>              | 5.490343  | 2.4568963 | 5.490343 up  | chr6:170591329-170599480 (-) // 96.83 // q27   |
| 243998_at    | <i>KRT222</i>            | 5.4681673 | 2.4510574 | 5.4681673 up | chr17:38811873-38812300 (-) // 98.61 // q21.2  |
| 1563706_at   |                          | 5.4518824 | 2.4467545 | 5.4518824 up | chr12:94185691-94187912 (-) // 29.85 // q22    |
| 225342_at    | <i>AK4//LOC10050785</i>  | 5.4172783 | 2.4375682 | 5.4172783 up | chr1:65695094-65697828 (+) // 90.98 // p31.3   |
| 229973_at    | <i>C1orf173</i>          | 5.412207  | 2.436217  | 5.412207 up  | chr1:75033806-75034466 (-) // 85.28 // p31.1   |
| 241060_x_at  |                          | 5.411193  | 2.4359467 | 5.411193 up  | chr4:99565505-99565800 (-) // 58.03 // q23     |
| 219227_at    | <i>CCNJL</i>             | 5.4029865 | 2.433757  | 5.4029865 up | chr5:159678670-159682703 (-) // 99.74 // q33.3 |
| 229643_at    | <i>AC078883.3//AC078</i> | 5.3991218 | 2.4327247 | 5.3991218 up | chr2:173292473-173338943 (-) // 98.88 // q31.1 |
| 206176_at    | <i>BMP6</i>              | 5.380142  | 2.4276443 | 5.380142 up  | chr6:7727009-7881727 (+) // 94.67 // p24.3     |
| 1554836_at   | <i>USP36</i>             | 5.35891   | 2.4219396 | 5.35891 up   | chr17:76822554-76836954 (-) // 95.62 // q25.3  |
|              |                          |           |           |              | chr12:7996000-7996622 (+) // 98.07 //          |
|              |                          |           |           |              | p13.31//chr12:8124686-8125304 (+) // 96.95 //  |
|              |                          |           |           |              | p13.31                                         |
| 240055_at    |                          | 5.3496156 | 2.4194353 | 5.3496156 up | chr10:6392277-6394723 (+) // 45.64 // p15.1    |
| 1559756_at   | <i>DKFZp667F0711</i>     | 5.3387375 | 2.4164987 | 5.3387375 up | chr18:2705895-2706494 (+) // 80.79 // p11.32   |
| 241620_at    | <i>SMCHD1</i>            | 5.337823  | 2.4162514 | 5.337823 up  | chr5:179382479-179383844 (-) // 96.95 // q35.3 |
| 222058_at    | <i>RNF130</i>            | 5.33508   | 2.41551   | 5.33508 up   | chr2:192542861-192552291 (+) // 91.62 // q32.3 |
| 219334_s_at  | <i>NABP1</i>             | 5.32084   | 2.411654  | 5.32084 up   | chr12:368156-372002 (-) // 69.41 // p13.33     |
| 237058_x_at  | <i>SLC6A13</i>           | 5.3155527 | 2.4102197 | 5.3155527 up |                                                |

|             |                   |           |           |              |                                                                                                                                                                                                                                                                                                                                                                                                                                                                                                                                                                                                                                                                                                                                                                                                                                                                                                                                                                                                          |
|-------------|-------------------|-----------|-----------|--------------|----------------------------------------------------------------------------------------------------------------------------------------------------------------------------------------------------------------------------------------------------------------------------------------------------------------------------------------------------------------------------------------------------------------------------------------------------------------------------------------------------------------------------------------------------------------------------------------------------------------------------------------------------------------------------------------------------------------------------------------------------------------------------------------------------------------------------------------------------------------------------------------------------------------------------------------------------------------------------------------------------------|
| 244766_at   | LOC100271836///LO | 5.3116117 | 2.4091496 | 5.3116117 up | chr16:22496040-22496882 (+) // 85.91 //<br>p12.2///chr16:29546601-29547445 (-) // 73.34 //<br>p11.2///chr16:30286586-30287430 (-) // 80.68 //<br>p11.2///chr16:29444834-29445679 (-) // 73.34 //<br>p11.2///chr16:21896905-21897747 (-) // 86.03 //<br>p12.2///chr16:21464662-21465504 (-) // 85.91 //<br>p12.2<br>chr16:28655910-28669004 (+) // 89.08 //<br>p11.2///chr16:28770024-28783129 (+) // 89.08 //<br>p11.2///chr16:29049975-29063048 (+) // 88.94 //<br>p11.2///chr16:74411871-74424944 (+) // 88.81 //<br>q23.1///chr16:22538886-22544602 (+) // 83.51 //<br>p12.2///chr16:28468691-28481759 (-) // 89.21 //<br>p11.2///chr16:28354853-28367922 (-) // 89.15 //<br>p11.2///chr16:29395954-29401669 (-) // 83.79 //<br>p11.2///chr16:29497498-29503195 (-) // 83.72 //<br>p11.2///chr16:21416958-21422662 (-) // 83.58 //<br>p12.2///chr16:30237468-30243168 (-) // 83.58 //<br>p11.2///chr16:21849409-21855114 (-) // 83.51 //<br>p12.2///chr16:12022080-12027780 (-) // 82.84 //<br>p13.13 |
| 215920_s_at | NPIP3///PDXDC2P   | 5.307869  | 2.4081328 | 5.307869 up  | chr11:12282278-12285332 (+) // 96.98 // p15.3                                                                                                                                                                                                                                                                                                                                                                                                                                                                                                                                                                                                                                                                                                                                                                                                                                                                                                                                                            |
| 212473_s_at | MICAL2            | 5.302055  | 2.4065516 | 5.302055 up  | chr12:11960851-11961371 (+) // 81.58 // p13.2                                                                                                                                                                                                                                                                                                                                                                                                                                                                                                                                                                                                                                                                                                                                                                                                                                                                                                                                                            |
| 243454_at   |                   | 5.298684  | 2.4056342 | 5.298684 up  | chr7:130724069-130724751 (+) // 98.55 // q32.3                                                                                                                                                                                                                                                                                                                                                                                                                                                                                                                                                                                                                                                                                                                                                                                                                                                                                                                                                           |
| 242768_at   |                   | 5.297504  | 2.4053128 | 5.297504 up  | chr3:23946781-23947286 (+) // 9.46 // p24.2                                                                                                                                                                                                                                                                                                                                                                                                                                                                                                                                                                                                                                                                                                                                                                                                                                                                                                                                                              |
| 1563348_at  |                   | 5.2871704 | 2.4024959 | 5.2871704 up | chr6:159126349-159130903 (+) // 74.61 // q25.3                                                                                                                                                                                                                                                                                                                                                                                                                                                                                                                                                                                                                                                                                                                                                                                                                                                                                                                                                           |
| 1562255_at  | SYTL3             | 5.249905  | 2.3922913 | 5.249905 up  | chr1:15018621-15019112 (-) // 76.17 // p36.21                                                                                                                                                                                                                                                                                                                                                                                                                                                                                                                                                                                                                                                                                                                                                                                                                                                                                                                                                            |
| 217402_at   | TBCAP2///TBCAP2   | 5.2498536 | 2.3922772 | 5.2498536 up | chr1:197549239-197550508 (-) // 58.63 // q31.3                                                                                                                                                                                                                                                                                                                                                                                                                                                                                                                                                                                                                                                                                                                                                                                                                                                                                                                                                           |
| 234041_at   |                   | 5.248284  | 2.3918457 | 5.248284 up  | chr5:95243000-95243547 (-) // 82.8 // q15                                                                                                                                                                                                                                                                                                                                                                                                                                                                                                                                                                                                                                                                                                                                                                                                                                                                                                                                                                |
| 235592_at   |                   | 5.245314  | 2.3910291 | 5.245314 up  | chr10:30723192-30750761 (+) // 96.92 // p11.23                                                                                                                                                                                                                                                                                                                                                                                                                                                                                                                                                                                                                                                                                                                                                                                                                                                                                                                                                           |
| 205027_s_at | MAP3K8            | 5.2380514 | 2.3890302 | 5.2380514 up | chr17:78440947-78450398 (-) // 95.29 // q25.3                                                                                                                                                                                                                                                                                                                                                                                                                                                                                                                                                                                                                                                                                                                                                                                                                                                                                                                                                            |
| 204684_at   | NPTX1             | 5.2325654 | 2.3875184 | 5.2325654 up | chr9:132686003-132687158 (-) // 94.46 // q34.11                                                                                                                                                                                                                                                                                                                                                                                                                                                                                                                                                                                                                                                                                                                                                                                                                                                                                                                                                          |
| 230086_at   | FNBP1             | 5.2143373 | 2.382484  | 5.2143373 up | chr12:105196332-105197751 (-) // 80.34 // q23.3                                                                                                                                                                                                                                                                                                                                                                                                                                                                                                                                                                                                                                                                                                                                                                                                                                                                                                                                                          |
| 235299_at   | SLC41A2           | 5.206944  | 2.380437  | 5.206944 up  | chr5:60832766-60833387 (+) // 95.31 // q12.1                                                                                                                                                                                                                                                                                                                                                                                                                                                                                                                                                                                                                                                                                                                                                                                                                                                                                                                                                             |
| 236809_at   |                   | 5.206753  | 2.380384  | 5.206753 up  |                                                                                                                                                                                                                                                                                                                                                                                                                                                                                                                                                                                                                                                                                                                                                                                                                                                                                                                                                                                                          |

|              |                        |           |           |              |                                                                                                                                                            |
|--------------|------------------------|-----------|-----------|--------------|------------------------------------------------------------------------------------------------------------------------------------------------------------|
| 1556329_a_at |                        | 5.20671   | 2.380372  | 5.20671 up   | chr4:134114522-134115762 (+) // 96.9 // q28.3<br>chr12:123199303-123201344 (-) // 98.59 //<br>q24.31///chr12:123185840-123187883 (-) // 96.68<br>// q24.31 |
| 205220_at    | <i>HCAR3</i>           | 5.1965303 | 2.3775487 | 5.1965303 up |                                                                                                                                                            |
| 231127_at    |                        | 5.173668  | 2.3711874 | 5.173668 up  | chr12:69041367-69041841 (-) // 90.57 // q15                                                                                                                |
| 1553792_at   | <i>KIAA1109</i>        | 5.16876   | 2.3698182 | 5.16876 up   | chr4:123183916-123197340 (+) // 97.04 // q27                                                                                                               |
| 239501_at    |                        | 5.1493716 | 2.3643963 | 5.1493716 up | chr10:76431427-76431918 (+) // 98.0 // q22.2                                                                                                               |
| 243771_at    |                        | 5.1307764 | 2.359177  | 5.1307764 up | chr20:37544700-37545349 (+) // 22.46 // q11.23                                                                                                             |
| 236864_at    | <i>SYTL3</i>           | 5.117877  | 2.3555455 | 5.117877 up  | chr6:159171485-159173323 (+) // 45.07 // q25.3                                                                                                             |
| 219450_at    | <i>C4orf19</i>         | 5.1172066 | 2.3553565 | 5.1172066 up | chr4:37585854-37593434 (+) // 94.21 // p14                                                                                                                 |
| 91682_at     |                        | 5.112114  | 2.35392   | 5.112114 up  | chr8:145133638-145134165 (+) // 79.32 // q24.3                                                                                                             |
| 1565734_at   |                        | 5.0952706 | 2.3491588 | 5.0952706 up | chr12:4397398-4400101 (-) // 96.3 // p13.32                                                                                                                |
| 243149_at    |                        | 5.0877247 | 2.3470206 | 5.0877247 up |                                                                                                                                                            |
| 240038_at    |                        | 5.0837903 | 2.3459046 | 5.0837903 up | chr5:95241464-95241927 (-) // 100.0 // q15                                                                                                                 |
| 241969_at    | <i>ARID5B</i>          | 5.0552664 | 2.3377872 | 5.0552664 up | chr10:63832689-63833144 (+) // 99.34 // q21.2                                                                                                              |
| 241929_at    |                        | 5.054365  | 2.33753   | 5.054365 up  | chr7:80283743-80284830 (+) // 69.58 // q21.11                                                                                                              |
| 204150_at    | <i>STAB1</i>           | 5.0529146 | 2.3371158 | 5.0529146 up | chr3:52529399-52558500 (+) // 99.87 // p21.1                                                                                                               |
| 213060_s_at  | <i>CHI3L2</i>          | 5.041824  | 2.3339458 | 5.041824 up  | chr1:111772332-111786062 (+) // 92.13 // p13.3                                                                                                             |
| 1560908_at   |                        | 4.9875216 | 2.3183231 | 4.9875216 up |                                                                                                                                                            |
| 244726_at    |                        | 4.9816904 | 2.3166354 | 4.9816904 up | chr20:8355977-8356611 (+) // 44.12 // p12.3                                                                                                                |
| 202686_s_at  | <i>AXL</i>             | 4.975713  | 2.3149033 | 4.975713 up  | chr19:41724822-41767670 (+) // 91.33 // q13.2                                                                                                              |
| 240655_at    |                        | 4.969569  | 2.3131208 | 4.969569 up  | chr3:105244655-105245133 (+) // 99.79 // q13.11                                                                                                            |
| 234036_x_at  |                        | 4.9682918 | 2.3127499 | 4.9682918 up | chr15:77529784-77532948 (-) // 69.7 // q24.3                                                                                                               |
| 243659_at    |                        | 4.9629083 | 2.3111858 | 4.9629083 up | chr5:95243542-95244158 (-) // 63.88 // q15                                                                                                                 |
| 1563502_at   | <i>ZDHHC2</i>          | 4.95286   | 2.3082619 | 4.95286 up   | chr8:17028530-17034323 (+) // 47.62 // p22                                                                                                                 |
| 241671_x_at  | <i>LINC00340</i>       | 4.948641  | 2.3070323 | 4.948641 up  | chr6:22146815-22147245 (+) // 93.75 // p22.3                                                                                                               |
| 1562454_at   |                        | 4.94377   | 2.3056116 | 4.94377 up   | chr10:114859011-114861521 (+) // 66.67 // q25.2                                                                                                            |
| 237749_at    | <i>OTTHUMG00000179</i> | 4.9338093 | 2.302702  | 4.9338093 up | chr18:53119762-53119941 (+) // 44.84 // q21.2                                                                                                              |
| 233201_at    |                        | 4.9309635 | 2.3018696 | 4.9309635 up | chr2:197714179-197716887 (+) // 42.4 // q33.1                                                                                                              |
| 243528_at    |                        | 4.92293   | 2.2995172 | 4.92293 up   | chr8:17064857-17065379 (+) // 91.74 // p22                                                                                                                 |
| 239578_at    |                        | 4.91995   | 2.2986436 | 4.91995 up   | chr2:159947892-159948316 (+) // 94.31 // q24.2                                                                                                             |
| 230433_at    | <i>LOC729970</i>       | 4.896383  | 2.2917163 | 4.896383 up  | chr1:95426880-95428825 (+) // 91.86 // p21.3                                                                                                               |
| 209959_at    | <i>NR4A3</i>           | 4.8957524 | 2.2915306 | 4.8957524 up | chr9:102589008-102629173 (+) // 92.61 // q22.33                                                                                                            |
| 1557349_at   | <i>RERE</i>            | 4.88932   | 2.2896338 | 4.88932 up   | chr1:8525029-8813897 (-) // 93.29 // p36.23                                                                                                                |

|             |                           |           |           |              |                                                                                                                                                                                               |
|-------------|---------------------------|-----------|-----------|--------------|-----------------------------------------------------------------------------------------------------------------------------------------------------------------------------------------------|
| 222872_x_at | <i>NABP1</i>              | 4.8822126 | 2.2875352 | 4.8822126 up | chr2:192542870-192552291 (+) // 91.26 // q32.3<br>chr16:72924-75121 (+) // 60.1 //<br>p13.3///chrY:59347295-59349493 (-) // 59.62 //<br>q12///chrX:155244289-155246487 (-) // 59.62 //<br>q28 |
| 1568838_at  | <i>WASIR1///WASIR1///</i> | 4.8797855 | 2.2868178 | 4.8797855 up | chr18:53131965-53132389 (-) // 97.47 // q21.2                                                                                                                                                 |
| 244480_at   |                           | 4.86522   | 2.282505  | 4.86522 up   | chr2:157180950-157189212 (-) // 98.27 // q24.1                                                                                                                                                |
| 204621_s_at | <i>NR4A2</i>              | 4.8640614 | 2.2821615 | 4.8640614 up | chr18:2847027-2914090 (+) // 98.63 // p11.32                                                                                                                                                  |
| 224374_s_at | <i>EMILIN2</i>            | 4.863797  | 2.282083  | 4.863797 up  | chr9:99082987-99145954 (-) // 91.73 // q22.32                                                                                                                                                 |
| 213082_s_at | <i>SLC35D2</i>            | 4.863311  | 2.2819388 | 4.863311 up  | chr18:20774409-20840431 (+) // 98.13 // q11.2                                                                                                                                                 |
| 225532_at   | <i>CABLES1</i>            | 4.8590827 | 2.280684  | 4.8590827 up | chr8:22545238-22550815 (-) // 90.46 // p21.3                                                                                                                                                  |
| 206115_at   | <i>EGR3</i>               | 4.856276  | 2.2798505 | 4.856276 up  | chr2:173996512-173996933 (+) // 98.59 // q31.1                                                                                                                                                |
| 237548_at   |                           | 4.852323  | 2.2786756 | 4.852323 up  | chr10:97137616-97138508 (-) // 80.28 // q24.1                                                                                                                                                 |
| 242736_at   |                           | 4.8374004 | 2.274232  | 4.8374004 up | chr12:51901761-51902975 (+) // 72.52 // q13.13                                                                                                                                                |
| 228935_at   | <i>SLC4A8</i>             | 4.833849  | 2.2731724 | 4.833849 up  | chr2:242001298-242002096 (+) // 52.85 // q37.3                                                                                                                                                |
| 243102_at   |                           | 4.8253884 | 2.2706451 | 4.8253884 up | chr9:114354955-114362093 (-) // 99.41 // q31.3                                                                                                                                                |
| 228824_s_at | <i>PTGR1</i>              | 4.8238707 | 2.2701912 | 4.8238707 up | chrX:20198233-20198687 (-) // 100.0 // p22.12                                                                                                                                                 |
| 241460_at   |                           | 4.821819  | 2.2695775 | 4.821819 up  | chr9:99082987-99145954 (-) // 91.73 // q22.32                                                                                                                                                 |
| 213083_at   | <i>SLC35D2</i>            | 4.797085  | 2.262158  | 4.797085 up  | chr18:44420949-44421904 (-) // 97.73 // q21.1                                                                                                                                                 |
| 244633_at   |                           | 4.7796884 | 2.2569165 | 4.7796884 up | chr11:85405263-85426180 (-) // 97.27 // q14.1                                                                                                                                                 |
| 225496_s_at | <i>SYTL2</i>              | 4.7714906 | 2.25444   | 4.7714906 up | chr7:130729256-130732023 (-) // 17.51 // q32.3                                                                                                                                                |
| 216813_at   |                           | 4.7653346 | 2.2525775 | 4.7653346 up | chr6:161551051-161556499 (-) // 93.13 // q26                                                                                                                                                  |
| 228667_at   | <i>AGPAT4</i>             | 4.7489057 | 2.247595  | 4.7489057 up | chr1:226914399-226915714 (-) // 99.54 // q42.12                                                                                                                                               |
| 235213_at   | <i>ITPKB</i>              | 4.741548  | 2.2453582 | 4.741548 up  | chr8:134537860-134540252 (+) // 48.06 // q24.22                                                                                                                                               |
| 221105_at   |                           | 4.7371817 | 2.244029  | 4.7371817 up | chr2:64329987-64371588 (-) // 64.32 // p14                                                                                                                                                    |
| 232213_at   | <i>PELI1</i>              | 4.734657  | 2.24326   | 4.734657 up  | chr12:70637234-70739846 (+) // 88.88 // q15                                                                                                                                                   |
| 233054_at   | <i>CNOT2</i>              | 4.732551  | 2.242618  | 4.732551 up  | chr11:36398943-36400755 (+) // 86.25 // p13                                                                                                                                                   |
| 233379_at   | <i>PRR5L</i>              | 4.7325425 | 2.2426155 | 4.7325425 up | chr17:76753088-76755640 (-) // 36.07 // q25.3                                                                                                                                                 |
| 1557551_at  |                           | 4.732187  | 2.242507  | 4.732187 up  | chr7:130789419-130789808 (-) // 67.89 // q32.3                                                                                                                                                |
| 222378_at   |                           | 4.7289042 | 2.2415059 | 4.7289042 up | chr16:65318404-65318878 (-) // 99.58 // q21                                                                                                                                                   |
| 231518_at   | <i>LINC00922</i>          | 4.7260604 | 2.240638  | 4.7260604 up | chr9:74964593-74965731 (-) // 98.43 // q21.13                                                                                                                                                 |
| 244787_at   |                           | 4.7193832 | 2.2385983 | 4.7193832 up | chr2:121974165-121974684 (-) // 92.64 // q14.2                                                                                                                                                |
| 227642_at   | <i>TFCP2L1</i>            | 4.7106795 | 2.2359352 | 4.7106795 up | chr12:12631806-12632529 (+) // 70.4 // p13.2                                                                                                                                                  |
| 1557343_at  |                           | 4.680646  | 2.2267077 | 4.680646 up  | chr3:30048084-30048527 (+) // 99.77 // p24.1                                                                                                                                                  |
| 241789_at   | <i>RBMS3</i>              | 4.673183  | 2.2244055 | 4.673183 up  |                                                                                                                                                                                               |



|             |                       |           |           |              |                                                  |
|-------------|-----------------------|-----------|-----------|--------------|--------------------------------------------------|
| 207952_at   | <i>IL5</i>            | 4.6715493 | 2.223901  | 4.6715493 up | chr5:131877135-131879214 (-) // 99.88 // q31.1   |
| 244286_at   |                       | 4.6707973 | 2.2236688 | 4.6707973 up | chr9:132676467-132677069 (-) // 62.11 // q34.11  |
| 1562576_at  |                       | 4.663802  | 2.2215066 | 4.663802 up  | chr7:112118573-112120779 (-) // 74.93 // q31.1   |
| 223503_at   | <i>TMEM163</i>        | 4.660312  | 2.2204266 | 4.660312 up  | chr2:135213332-135214254 (-) // 99.68 // q21.3   |
| 213346_at   | <i>TEX30</i>          | 4.6568594 | 2.2193573 | 4.6568594 up | chr13:103418464-103422620 (-) // 85.07 // q33.1  |
| 234501_x_at |                       | 4.65656   | 2.2192645 | 4.65656 up   |                                                  |
| 226099_at   | <i>ELL2</i>           | 4.6471376 | 2.2163424 | 4.6471376 up | chr5:95222194-95224470 (-) // 93.99 // q15       |
| 1555513_at  | <i>PIAS2</i>          | 4.6460166 | 2.2159944 | 4.6460166 up | chr18:44416208-44500123 (-) // 97.82 // q21.1    |
| 241023_at   |                       | 4.6351438 | 2.212614  | 4.6351438 up | chr11:75723482-75723827 (+) // 93.24 // q13.5    |
| 223746_at   | <i>STK4</i>           | 4.626155  | 2.2098136 | 4.626155 up  | chr20:43595155-43601541 (+) // 96.82 // q13.12   |
| 220983_s_at | <i>MIR612///NEAT1</i> | 4.6202254 | 2.2079632 | 4.6202254 up | chr5:141690005-141704566 (-) // 58.7 // q31.3    |
| 232304_at   | <i>PELI1</i>          | 4.614102  | 2.20605   | 4.614102 up  | chr2:64331834-64333714 (-) // 86.92 // p14       |
| 241621_at   | <i>SMCHD1</i>         | 4.610368  | 2.204882  | 4.610368 up  | chr18:2705908-2706499 (-) // 80.3 // p11.32      |
| 221282_x_at | <i>RUNX2</i>          | 4.5948925 | 2.200031  | 4.5948925 up | chr6:45390313-45515042 (+) // 90.94 // p21.1     |
| 239725_at   | <i>PGAP1</i>          | 4.5885024 | 2.1980233 | 4.5885024 up | chr2:197697716-197698062 (-) // 99.71 // q33.1   |
| 1561882_at  | <i>SYTL3</i>          | 4.5825405 | 2.1961477 | 4.5825405 up | chr6:159115997-159117049 (+) // 15.16 // q25.3   |
| 226018_at   | <i>C7orf41</i>        | 4.5660505 | 2.1909468 | 4.5660505 up | chr7:30201359-30202378 (+) // 90.74 // p14.3     |
| 236337_at   | <i>SYCP2L</i>         | 4.562912  | 2.1899548 | 4.562912 up  | chr6:10961551-10974532 (+) // 96.35 // p24.2     |
| 240262_at   |                       | 4.5621343 | 2.189709  | 4.5621343 up | chr5:138133147-138133574 (+) // 91.9 // q31.2    |
| 1565557_at  |                       | 4.5619526 | 2.1896515 | 4.5619526 up |                                                  |
| 233867_at   |                       | 4.5577765 | 2.1883302 | 4.5577765 up | chr5:60702778-60703934 (-) // 14.6 // q12.1      |
| 1552835_at  | <i>DENND1B</i>        | 4.551002  | 2.1861842 | 4.551002 up  | chr1:197521384-197744322 (-) // 94.91 // q31.3   |
| 237032_x_at | <i>SIPA1L1</i>        | 4.5419774 | 2.1833205 | 4.5419774 up | chr14:72041327-72041809 (+) // 98.77 // q24.2    |
| 1566994_at  |                       | 4.538399  | 2.1821835 | 4.538399 up  | chr6:15366989-15367738 (+) // 86.77 // p22.3     |
| 219479_at   | <i>KDELC1</i>         | 4.536325  | 2.181524  | 4.536325 up  | chr13:103436631-103451357 (-) // 98.8 // q33.1   |
| 236992_at   |                       | 4.5326486 | 2.1803544 | 4.5326486 up | chr4:37597291-37597768 (+) // 93.66 // p14       |
| 207090_x_at | <i>ZFP30</i>          | 4.5086036 | 2.1726806 | 4.5086036 up | chr19:38123388-38146313 (-) // 62.34 // q13.12   |
| 1569477_at  |                       | 4.507561  | 2.172347  | 4.507561 up  | chr6:108953629-108955041 (+) // 89.87 // q21     |
| 238263_at   | <i>EPHA1-AS1</i>      | 4.498304  | 2.1693811 | 4.498304 up  | chr7:143112157-143112922 (+) // 94.07 // q35     |
|             |                       |           |           |              | chrY:28673690-28674139 (+) // 65.36 //           |
|             |                       |           |           |              | q11.23///chr13:20054531-20054979 (-) // 65.14 // |
|             |                       |           |           |              | q12.11///chr21:10957658-10958107 (-) // 50.54 // |
|             |                       |           |           |              | p11.1///chr22:38763903-38764352 (-) // 36.38 //  |
| 239715_at   |                       | 4.4895806 | 2.1665807 | 4.4895806 up | q13.1                                            |

|              |                         |           |           |              |                                                 |
|--------------|-------------------------|-----------|-----------|--------------|-------------------------------------------------|
| 205801_s_at  | <i>RASGRP3</i>          | 4.489558  | 2.1665735 | 4.489558 up  | chr2:33738941-33789672 (+) // 95.72 // p22.3    |
| 1554615_at   | <i>OTTHUMG00000169</i>  | 4.4888787 | 2.1663551 | 4.4888787 up | chr12:104945590-104947218 (+) // 32.91 // q23.3 |
| 1559762_at   |                         | 4.4826427 | 2.1643496 | 4.4826427 up | chr16:75083966-75085609 (+) // 4.91 // q23.1    |
| 206606_at    | <i>LIPC</i>             | 4.468058  | 2.159648  | 4.468058 up  | chr15:58724174-58861072 (+) // 99.75 // q21.3   |
| 1566966_at   |                         | 4.467483  | 2.1594622 | 4.467483 up  | chr1:97594641-97595338 (-) // 58.26 // p21.3    |
| 1569362_at   | <i>ALCAM</i>            | 4.466594  | 2.1591752 | 4.466594 up  | chr3:105085761-105244228 (+) // 81.96 // q13.11 |
| 213469_at    | <i>PGAP1</i>            | 4.4536915 | 2.1550016 | 4.4536915 up | chr2:197700305-197705337 (-) // 81.14 // q33.1  |
| 234255_at    |                         | 4.4377565 | 2.1498306 | 4.4377565 up | chr5:130708922-130710231 (-) // 28.11 // q31.1  |
| 205645_at    | <i>REPS2</i>            | 4.437113  | 2.1496212 | 4.437113 up  | chrX:16964813-17165735 (+) // 92.21 // p22.2    |
| 221980_at    | <i>EMILIN2</i>          | 4.4345784 | 2.148797  | 4.4345784 up | chr18:2909755-2915991 (+) // 89.46 // p11.31    |
| 1569830_at   | <i>PTPRC</i>            | 4.432836  | 2.14823   | 4.432836 up  | chr1:198608233-198664299 (+) // 57.78 // q31.3  |
| 244535_at    |                         | 4.430061  | 2.1473265 | 4.430061 up  | chr3:71278134-71278580 (-) // 98.67 // p13      |
| 231897_at    | <i>PTGR1</i>            | 4.4244514 | 2.1454985 | 4.4244514 up | chr9:114325248-114361687 (-) // 97.15 // q31.3  |
| 214508_x_at  | <i>CREM</i>             | 4.4146957 | 2.142314  | 4.4146957 up | chr10:35484975-35500890 (+) // 98.92 // p11.21  |
| 233134_at    | <i>RPH3AL</i>           | 4.4118037 | 2.1413686 | 4.4118037 up | chr17:62066-202576 (-) // 83.29 // p13.3        |
| 241788_x_at  |                         | 4.398549  | 2.1370277 | 4.398549 up  | chr19:39144535-39145201 (+) // 57.85 // q13.2   |
| 243328_at    |                         | 4.387428  | 2.1333754 | 4.387428 up  | chr9:27530943-27531338 (+) // 74.82 // p21.2    |
| 1561966_at   |                         | 4.380024  | 2.1309388 | 4.380024 up  | chr3:15799660-15803693 (+) // 68.98 // p25.1    |
| 206767_at    | <i>RBMS3</i>            | 4.3774285 | 2.1300836 | 4.3774285 up | chr3:29323024-30032755 (+) // 97.54 // p24.1    |
| 212501_at    | <i>CEBPB</i>            | 4.3707123 | 2.1278684 | 4.3707123 up | chr20:48807124-48809209 (+) // 75.8 // q13.13   |
| 239102_s_at  |                         | 4.3537774 | 2.1222677 | 4.3537774 up | chr11:85674980-85675387 (-) // 86.29 // q14.2   |
| 1555687_a_at | <i>CLEC4C</i>           | 4.353196  | 2.122075  | 4.353196 up  | chr12:7882010-7899951 (-) // 94.86 // p13.31    |
| 1569791_at   | <i>STK4</i>             | 4.3522563 | 2.1217635 | 4.3522563 up | chr20:43595193-43604324 (+) // 76.92 // q13.12  |
| 214964_at    |                         | 4.323275  | 2.1121247 | 4.323275 up  | chr7:5365381-5368071 (-) // 34.38 // p22.1      |
| 239089_at    |                         | 4.320088  | 2.1110606 | 4.320088 up  | chr4:9824993-9825859 (-) // 69.37 // p16.1      |
| 244845_at    |                         | 4.318072  | 2.1103873 | 4.318072 up  | chr3:71318263-71320141 (-) // 96.99 // p13      |
| 39548_at     | <i>NPAS2</i>            | 4.317879  | 2.110323  | 4.317879 up  | chr2:101436612-101612781 (+) // 92.7 // q11.2   |
| 225308_s_at  | <i>TANC1</i>            | 4.3167863 | 2.1099577 | 4.3167863 up | chr2:160007034-160089168 (+) // 98.0 // q24.2   |
| 239203_at    | <i>LSMEM1</i>           | 4.316668  | 2.109918  | 4.316668 up  | chr7:112129989-112131117 (+) // 93.19 // q31.1  |
| 225799_at    | <i>LINC00152//LOC54</i> | 4.312265  | 2.108446  | 4.312265 up  | chr2:87754980-87821032 (+) // 89.44 // p11.2    |
| 1552497_a_at | <i>SLAMF6</i>           | 4.3107476 | 2.107938  | 4.3107476 up | chr1:160455620-160493042 (-) // 51.96 // q23.2  |
| 224093_at    | <i>IFNK</i>             | 4.307085  | 2.1067119 | 4.307085 up  | chr9:27524311-27526491 (+) // 98.78 // p21.2    |
| 233085_s_at  | <i>NABP1</i>            | 4.3058376 | 2.106294  | 4.3058376 up | chr2:192548211-192551664 (+) // 85.35 // q32.3  |
| 241371_at    | <i>TNFRSF10A</i>        | 4.3039303 | 2.1056547 | 4.3039303 up | chr8:23047968-23048455 (-) // 27.98 // p21.3    |

|              |           |           |           |              |                                                 |
|--------------|-----------|-----------|-----------|--------------|-------------------------------------------------|
| 1565978_a_at |           | 4.290699  | 2.1012127 | 4.290699 up  |                                                 |
| 213714_at    | CACNB2    | 4.2855225 | 2.099471  | 4.2855225 up | chr10:18429605-18830039 (+) // 97.25 // p12.33  |
| 1558643_s_at | EDIL3     | 4.28318   | 2.0986824 | 4.28318 up   | chr5:83402585-83680564 (-) // 92.66 // q14.3    |
| 227361_at    | HS3ST3B1  | 4.2827697 | 2.0985441 | 4.2827697 up | chr17:14204399-14252721 (+) // 98.67 // p12     |
| 237018_at    |           | 4.2772336 | 2.096678  | 4.2772336 up | chr15:86250511-86251032 (+) // 97.75 // q25.3   |
| 236558_at    |           | 4.2537227 | 2.088726  | 4.2537227 up | chr3:152126571-152127257 (+) // 55.69 // q25.2  |
|              |           |           |           |              | chr9:42832343-42833095 (+) // 57.26 //          |
|              |           |           |           |              | p12///chr9:67005352-67006104 (+) // 56.86 //    |
|              |           |           |           |              | q13///chr9:69947126-69947878 (-) // 50.6 //     |
|              |           |           |           |              | q21.11///chr9:66766919-66767671 (-) // 55.26 // |
|              |           |           |           |              | q13///chr9:70062617-70063369 (-) // 55.13 //    |
|              |           |           |           |              | q21.11///chr9:67314283-67315035 (-) // 57.12 // |
|              |           |           |           |              | q13///chr9:69676237-69676989 (-) // 54.99 //    |
|              |           |           |           |              | q21.11                                          |
| 238734_at    |           | 4.2510414 | 2.0878162 | 4.2510414 up | chr6:37872573-37875502 (+) // 37.33 // p21.2    |
| 1560342_at   |           | 4.2427974 | 2.0850158 | 4.2427974 up | chr3:105097299-105107052 (+) // 87.22 // q13.11 |
| 1563958_at   |           | 4.240293  | 2.084164  | 4.240293 up  | chr18:56201552-56202025 (-) // 70.56 // q21.32  |
| 236987_at    |           | 4.237867  | 2.0833383 | 4.237867 up  | chr12:70722027-70722510 (+) // 77.74 // q15     |
| 222313_at    |           | 4.2338552 | 2.081972  | 4.2338552 up | chr2:208627335-208629415 (-) // 97.66 // q33.3  |
| 221245_s_at  | FZD5      | 4.2323637 | 2.0814636 | 4.2323637 up | chr6:21909700-21910051 (+) // 65.09 // p22.3    |
| 241047_at    | LINC00340 | 4.2276096 | 2.079842  | 4.2276096 up | chr9:71862092-71863975 (+) // 98.78 // q21.11   |
| 232017_at    | TJP2      | 4.2217393 | 2.0778375 | 4.2217393 up | chr8:101706808-101709043 (-) // 55.25 // q22.3  |
| 1559509_at   |           | 4.220014  | 2.0772479 | 4.220014 up  | chr6:10556402-10627190 (+) // 100.0 // p24.3    |
| 211020_at    | GCNT2     | 4.209907  | 2.0737884 | 4.209907 up  | chr9:102584178-102596341 (+) // 88.02 // q22.33 |
| 216979_at    | NR4A3     | 4.209901  | 2.0737863 | 4.209901 up  | chr5:67565270-67565713 (+) // 100.0 // q13.1    |
| 244181_at    |           | 4.2098436 | 2.0737667 | 4.2098436 up | chr6:22186573-22186979 (+) // 27.64 // p22.3    |
| 236815_at    |           | 4.2041273 | 2.0718064 | 4.2041273 up | chr6:2966567-2968803 (-) // 19.64 // p25.2      |
| 1556950_s_at | SERPINB6  | 4.19886   | 2.0699978 | 4.19886 up   | chr3:59771038-59774468 (+) // 61.75 // p14.2    |
| 1566484_at   |           | 4.197872  | 2.0696583 | 4.197872 up  | chr2:28206828-28207893 (-) // 57.78 // p23.2    |
| 1562111_at   |           | 4.197779  | 2.0696263 | 4.197779 up  | chr8:134243326-134243933 (+) // 88.13 // q24.22 |
| 229802_at    | WISP1     | 4.1886725 | 2.066493  | 4.1886725 up | chr8:134242073-134242580 (+) // 42.69 // q24.22 |
| 235821_at    | WISP1     | 4.187287  | 2.0660157 | 4.187287 up  | chr17:14207170-14208822 (+) // 98.39 // p12     |
| 224507_s_at  | MGC12916  | 4.1802573 | 2.0635917 | 4.1802573 up | chr13:28577752-28674705 (-) // 99.14 // q12.2   |
| 206674_at    | FLT3      | 4.179666  | 2.0633876 | 4.179666 up  | chr9:35659784-35665228 (-) // 71.22 // p13.3    |
| 231892_at    | ARHGEF39  | 4.1725774 | 2.0609388 | 4.1725774 up |                                                 |

|              |                 |           |           |              |                                                 |
|--------------|-----------------|-----------|-----------|--------------|-------------------------------------------------|
| 1561214_at   |                 | 4.1697416 | 2.059958  | 4.1697416 up |                                                 |
| 220877_at    |                 | 4.1688466 | 2.0596483 | 4.1688466 up |                                                 |
| 239409_at    |                 | 4.160925  | 2.0569043 | 4.160925 up  | chr1:112197046-112197856 (+) // 35.85 // p13.2  |
| 206907_at    | <i>TNFSF9</i>   | 4.1583624 | 2.0560155 | 4.1583624 up | chr19:6531044-6535931 (+) // 77.08 // p13.3     |
| 224056_at    |                 | 4.156371  | 2.0553246 | 4.156371 up  | chr17:63026323-63027071 (-) // 50.77 // q24.1   |
| 239045_at    |                 | 4.1558523 | 2.0551443 | 4.1558523 up | chr17:62203291-62203917 (-) // 98.27 // q23.3   |
| 209875_s_at  | <i>SPP1</i>     | 4.1510077 | 2.0534616 | 4.1510077 up | chr4:88896869-88904284 (+) // 99.69 // q22.1    |
| 1556306_at   |                 | 4.147365  | 2.052195  | 4.147365 up  | chr7:104748383-104749319 (-) // 73.12 // q22.3  |
| 202859_x_at  | <i>IL8</i>      | 4.146919  | 2.0520399 | 4.146919 up  | chr4:74606301-74609431 (+) // 70.71 // q13.3    |
| 244781_x_at  |                 | 4.1336026 | 2.0473998 | 4.1336026 up | chr6:18420059-18420448 (+) // 25.36 // p22.3    |
| 1559410_at   |                 | 4.131018  | 2.0464973 | 4.131018 up  | chr3:125548302-125551265 (-) // 24.65 // q21.2  |
| 1552626_a_at | <i>TMEM163</i>  | 4.129384  | 2.0459266 | 4.129384 up  | chr2:135213560-135476566 (-) // 94.96 // q21.3  |
| 216046_at    |                 | 4.123075  | 2.0437207 | 4.123075 up  | chr15:85545792-85546870 (+) // 63.38 // q25.3   |
| 234632_x_at  |                 | 4.120379  | 2.042777  | 4.120379 up  | chr5:180343932-180344604 (+) // 20.99 // q35.3  |
| 229981_at    | <i>SNX5</i>     | 4.1140313 | 2.0405529 | 4.1140313 up | chr20:17922804-17924626 (-) // 63.21 // p11.23  |
| 233255_s_at  | <i>BIVM</i>     | 4.112873  | 2.0401466 | 4.112873 up  | chr13:103472736-103492498 (+) // 92.22 // q33.1 |
|              |                 |           |           |              | chr2:112229526-112230294 (+) // 69.08 //        |
|              |                 |           |           |              | q13//chr2:87777016-87777788 (-) // 69.72 //     |
|              |                 |           |           |              | p11.2                                           |
| 236595_at    |                 | 4.1116776 | 2.0397272 | 4.1116776 up | chr14:51388161-51390015 (-) // 56.04 // q22.1   |
| 232958_at    |                 | 4.105294  | 2.0374856 | 4.105294 up  | chr8:38790876-38791296 (+) // 56.39 // p11.22   |
| 238082_at    |                 | 4.1044483 | 2.0371883 | 4.1044483 up | chr4:80898690-80993854 (-) // 99.85 // q21.21   |
| 1555536_at   | <i>ANTXR2</i>   | 4.1011    | 2.036011  | 4.1011 up    | chr16:81734390-81734724 (+) // 65.37 // q23.3   |
| 243720_at    |                 | 4.1009192 | 2.0359473 | 4.1009192 up | chr5:138614468-138614668 (+) // 100.0 // q31.2  |
| 1567681_at   | <i>SNORA74A</i> | 4.0988092 | 2.035205  | 4.0988092 up | chr9:132681292-132682080 (-) // 96.68 // q34.11 |
| 230389_at    | <i>FNBP1</i>    | 4.093049  | 2.033176  | 4.093049 up  | chr19:13134445-13134625 (-) // 51.88 // p13.2   |
| 241633_x_at  |                 | 4.0854206 | 2.0304847 | 4.0854206 up | chr1:204042785-204096914 (+) // 91.6 // q32.1   |
| 38918_at     | <i>SOX13</i>    | 4.081551  | 2.0291176 | 4.081551 up  | chr4:170521058-170523289 (-) // 75.32 // q33    |
| 1564093_at   | <i>NEK1</i>     | 4.079299  | 2.0283213 | 4.079299 up  | chr16:29398878-29746914 (+) // 35.04 //         |
|              |                 |           |           |              | p11.2//chr18:11623192-11824686 (+) // 34.91 //  |
|              |                 |           |           |              | p11.21//chr16:74346681-74422013 (-) // 33.66 // |
|              |                 |           |           |              | q23.1                                           |
| 222145_at    |                 | 4.065319  | 2.0233686 | 4.065319 up  |                                                 |

|              |                   |           |           |           |    |
|--------------|-------------------|-----------|-----------|-----------|----|
| 222094_at    | LOC101060714///LO | 4.0632014 | 2.0226169 | 4.0632014 | up |
| 222761_at    | BIVM              | 4.0538297 | 2.0192854 | 4.0538297 | up |
| 1553706_at   | HTRA4             | 4.0519557 | 2.0186183 | 4.0519557 | up |
| 243716_at    |                   | 4.0498633 | 2.0178733 | 4.0498633 | up |
| 228175_at    | SLC4A8            | 4.048926  | 2.0175393 | 4.048926  | up |
| 209967_s_at  | CREM              | 4.0484023 | 2.0173526 | 4.0484023 | up |
| 233096_at    | KIAA1109          | 4.0437403 | 2.0156903 | 4.0437403 | up |
| 232188_at    | AKAP13            | 4.0408325 | 2.0146525 | 4.0408325 | up |
| 1560058_at   | LOC399900         | 4.0404596 | 2.0145195 | 4.0404596 | up |
| 210928_at    |                   | 4.0367084 | 2.0131793 | 4.0367084 | up |
| 207630_s_at  | CREM              | 4.033196  | 2.0119236 | 4.033196  | up |
| 1560492_at   |                   | 4.0269403 | 2.009684  | 4.0269403 | up |
| 207691_x_at  | ENTPD1            | 4.0255995 | 2.0092037 | 4.0255995 | up |
| 242320_at    |                   | 4.0251446 | 2.0090406 | 4.0251446 | up |
| 233689_at    |                   | 4.0222197 | 2.0079918 | 4.0222197 | up |
| 1569590_at   | DOCK5             | 4.018439  | 2.0066352 | 4.018439  | up |
| 1555039_a_at | ABCC4             | 4.0110703 | 2.0039873 | 4.0110703 | up |
| 239274_at    |                   | 3.9983804 | 1.9994158 | 3.9983804 | up |
| 237411_at    | ADAMTS6           | 3.998137  | 1.9993279 | 3.998137  | up |
| 222314_x_at  | EGOT              | 3.9961922 | 1.998626  | 3.9961922 | up |
| 234618_at    |                   | 3.9872992 | 1.9954119 | 3.9872992 | up |
| 234649_at    |                   | 3.9823668 | 1.9936261 | 3.9823668 | up |
| 244815_at    |                   | 3.9809906 | 1.9931275 | 3.9809906 | up |
| 243827_at    |                   | 3.9792833 | 1.9925086 | 3.9792833 | up |
| 243959_at    |                   | 3.9761996 | 1.9913902 | 3.9761996 | up |
| 228153_at    | RNF144B           | 3.9741051 | 1.99063   | 3.9741051 | up |
| 210998_s_at  | HGF               | 3.9738503 | 1.9905375 | 3.9738503 | up |
| 216408_at    | OR2B2             | 3.9664962 | 1.9878652 | 3.9664962 | up |
| 204548_at    | STAR              | 3.9635818 | 1.9868047 | 3.9635818 | up |
| 215137_at    |                   | 3.9634995 | 1.9867748 | 3.9634995 | up |
| 232614_at    |                   | 3.956595  | 1.9842594 | 3.956595  | up |
| 236552_at    |                   | 3.953958  | 1.9832976 | 3.953958  | up |

chr16:29468627-29469538 (+) // 86.18 //  
p11.2//chr16:30207969-30208880 (+) // 86.18 //  
p11.2  
chr13:103451504-103494222 (+) // 91.27 // q33.1  
chr8:38831696-38846153 (+) // 79.46 // p11.22  
chr7:130793390-130794098 (+) // 72.83 // q32.3  
chr12:51905763-51909547 (+) // 89.82 // q13.13  
chr10:35484054-35501078 (+) // 94.33 // p11.21  
chr4:123128388-123148902 (+) // 96.82 // q27  
chr15:86227459-86230332 (+) // 65.05 // q25.3  
chr11:61735253-61736962 (+) // 70.01 // q12.3  
chr12:70715460-70718054 (-) // 63.67 // q15  
chr10:35437299-35500752 (+) // 98.53 // p11.21  
chr12:94182680-94184240 (+) // 67.82 // q22  
chr10:97515929-97626359 (+) // 99.89 // q24.1  
chr6:108917142-108917585 (+) // 64.6 // q21  
chr10:114897666-114899570 (+) // 93.77 // q25.2  
chr8:25042237-25129193 (+) // 71.21 // p21.2  
chr13:95818476-95953589 (-) // 86.09 // q32.1  
chr11:85748611-85749176 (-) // 54.6 // q14.2  
chr5:64444565-64444941 (-) // 97.66 // q12.3  
chr3:4792427-4793239 (-) // 87.1 // p26.1  
  
chr1:167260233-167261719 (+) // 76.77 // q24.2  
chr17:76800785-76801199 (-) // 71.12 // q25.3  
chr6:37888749-37889671 (+) // 68.76 // p21.2  
chr7:131114594-131115221 (+) // 79.62 // q32.3  
chr6:18468030-18468850 (+) // 69.67 // p22.3  
chr7:81372006-81399362 (-) // 99.09 // q21.11  
chr6:27879023-27880097 (-) // 100.0 // p22.1  
chr8:38001169-38008462 (-) // 97.82 // p11.23  
chr1:2205628-2211643 (+) // 76.91 // p36.33  
chr18:60944825-60945901 (-) // 27.73 // q21.33  
chr11:85704936-85705416 (-) // 71.95 // q14.2

|              |                      |           |           |              |                                                  |
|--------------|----------------------|-----------|-----------|--------------|--------------------------------------------------|
| 1552773_at   | <i>CLEC4D</i>        | 3.951694  | 1.9824712 | 3.951694 up  | chr12:8666135-8674958 (+) // 96.55 // p13.31     |
| 206796_at    | <i>WISP1</i>         | 3.9384825 | 1.9776399 | 3.9384825 up | chr8:134203311-134241569 (+) // 90.11 // q24.22  |
| 208348_s_at  | <i>CBLB</i>          | 3.9297154 | 1.9744248 | 3.9297154 up | chr3:105399842-105587887 (-) // 99.58 // q13.11  |
| 206408_at    | <i>LRRTM2</i>        | 3.925462  | 1.9728625 | 3.925462 up  | chr5:138205078-138211009 (-) // 99.3 // q31.2    |
| 203888_at    | <i>THBD</i>          | 3.9213338 | 1.9713445 | 3.9213338 up | chr20:23026634-23030683 (-) // 93.63 // p11.21   |
| 1564567_at   |                      | 3.916853  | 1.969695  | 3.916853 up  | chr2:181891256-181892811 (-) // 85.51 // q31.3   |
| 243799_x_at  | <i>ANGPTL3</i>       | 3.915865  | 1.969331  | 3.915865 up  | chr1:63071689-63071989 (+) // 100.0 // p31.3     |
| 219614_s_at  | <i>SLC6A20</i>       | 3.9128776 | 1.96823   | 3.9128776 up | chr3:45796951-45837962 (-) // 73.7 // p21.31     |
| 60471_at     | <i>RIN3</i>          | 3.899518  | 1.9632958 | 3.899518 up  | chr14:93154759-93155338 (+) // 96.98 // q32.12   |
| 1552841_s_at | <i>BCL2L14</i>       | 3.8948085 | 1.9615524 | 3.8948085 up | chr12:12204729-12364018 (+) // 85.54 // p13.2    |
| 222071_s_at  | <i>SLCO4C1</i>       | 3.8831322 | 1.9572208 | 3.8831322 up | chr5:101569693-101571394 (-) // 91.31 // q21.1   |
| 244356_at    |                      | 3.8731854 | 1.9535205 | 3.8731854 up | chr7:77191569-77192275 (+) // 85.26 // q11.23    |
| 235103_at    | <i>MAN2A1</i>        | 3.8720193 | 1.9530861 | 3.8720193 up | chr5:109203583-109204447 (+) // 97.92 // q21.3   |
| 231428_at    |                      | 3.8682795 | 1.951692  | 3.8682795 up | chr6:7890885-7891566 (-) // 71.64 // p24.3       |
| 1570351_at   | <i>ADAMTS6</i>       | 3.8612611 | 1.9490721 | 3.8612611 up | chr5:64494163-64494784 (-) // 94.94 // q12.3     |
| 233073_at    |                      | 3.8598607 | 1.9485488 | 3.8598607 up | chr2:36663546-36665273 (+) // 21.47 // p22.2     |
| 1564753_at   |                      | 3.8547528 | 1.9466383 | 3.8547528 up | chr2:169360836-169361891 (+) // 28.52 // q24.3   |
| 1559612_at   |                      | 3.852442  | 1.9457732 | 3.852442 up  | chr4:140019721-140021866 (-) // 32.72 // q31.1   |
| 1566995_at   |                      | 3.8405051 | 1.9412961 | 3.8405051 up | chr6:15367182-15367738 (-) // 84.66 // p22.3     |
| 232246_at    | <i>TTC28-AS1</i>     | 3.8401244 | 1.941153  | 3.8401244 up | chr22:28388456-28404580 (+) // 99.49 // q12.1    |
| 1566896_at   |                      | 3.838608  | 1.9405832 | 3.838608 up  | chr12:121241092-121242236 (+) // 78.12 // q24.31 |
| 238320_at    | <i>MIR612//NEAT1</i> | 3.8332107 | 1.9385533 | 3.8332107 up | chr11:65202405-65204500 (+) // 61.12 // q13.1    |
| 230147_at    | <i>F2RL2</i>         | 3.829753  | 1.9372513 | 3.829753 up  | chr5:75911307-75911773 (-) // 81.18 // q13.3     |
| 242197_x_at  | <i>CD36</i>          | 3.8292277 | 1.9370534 | 3.8292277 up | chr7:80290771-80291272 (+) // 78.08 // q21.11    |
| 232768_at    | <i>CCNB2</i>         | 3.824541  | 1.9352866 | 3.824541 up  | chr15:59414787-59416605 (-) // 61.52 // q22.2    |
| 220613_s_at  | <i>SYTL2</i>         | 3.8197231 | 1.9334681 | 3.8197231 up | chr11:85444653-85468788 (-) // 82.64 // q14.1    |
| 230511_at    | <i>CREM</i>          | 3.8147626 | 1.9315933 | 3.8147626 up | chr10:35501340-35501886 (+) // 96.13 // p11.21   |
| 244573_at    |                      | 3.81237   | 1.9306881 | 3.81237 up   | chr15:85544142-85544600 (+) // 97.59 // q25.3    |
| 1562611_at   |                      | 3.807495  | 1.9288422 | 3.807495 up  | chr15:86277125-86279269 (-) // 85.34 // q25.3    |
| 215284_at    |                      | 3.8045323 | 1.9277191 | 3.8045323 up | chr6:158273056-158274823 (+) // 23.48 // q25.3   |

|             |                 |           |           |              |
|-------------|-----------------|-----------|-----------|--------------|
| 81737_at    | LOC100505915    | 3.8044634 | 1.927693  | 3.8044634 up |
| 243895_x_at | OTTHUMG00000182 | 3.801214  | 1.9264603 | 3.801214 up  |
| 231437_at   | SLC35D2         | 3.7961311 | 1.9245298 | 3.7961311 up |
| 232344_at   |                 | 3.7790644 | 1.9180291 | 3.7790644 up |
| 222342_at   |                 | 3.7782395 | 1.9177141 | 3.7782395 up |
| 39549_at    | NPAS2           | 3.7711773 | 1.915015  | 3.7711773 up |
| 244230_at   |                 | 3.768377  | 1.9139433 | 3.768377 up  |
| 1569823_at  | LOC440346       | 3.7653933 | 1.9128006 | 3.7653933 up |
| 232522_at   |                 | 3.7650106 | 1.9126539 | 3.7650106 up |
| 219956_at   | GALNT6          | 3.7648706 | 1.9126003 | 3.7648706 up |
| 243981_at   | STK4            | 3.7648382 | 1.9125879 | 3.7648382 up |
| 231684_at   | ANGPTL3         | 3.7639077 | 1.9122312 | 3.7639077 up |
| 1557706_at  | ZHX2            | 3.7601588 | 1.9107935 | 3.7601588 up |
| 239379_at   |                 | 3.758864  | 1.9102967 | 3.758864 up  |

chr16:21420400-21420976 (+) // 22.8 //  
 p12.2///chr16:29500934-29501510 (+) // 22.8 //  
 p11.2///chr16:30240904-30241480 (+) // 22.8 //  
 p11.2///chr16:29399396-29399969 (+) // 22.8 //  
 p11.2///chr16:12025511-12026085 (+) // 22.8 //  
 p13.13///chr16:18456232-18456806 (+) // 22.8 //  
 p12.3///chr16:28358309-28358885 (+) // 22.8 //  
 p11.2///chr16:15461716-15462287 (+) // 22.8 //  
 p13.11///chr16:18416080-18416656 (+) // 22.8 //  
 p12.3///chr16:15202393-15202962 (+) // 22.8 //  
 p13.11///chr16:21852852-21853419 (+) // 22.8 //  
 p12.2///chr18:11623710-11624277 (+) // 22.8 //  
 p11.21///chr16:22540590-22541160 (-) // 22.8 //  
 p12.2///chr16:28664972-28665548 (-) // 22.8 //  
 p11.2///chr16:28779097-28779671 (-) // 22.8 //  
 p11.2///chr16:14854494-14855069 (-) // 22.8 //  
 p13.11///chr16:14815378-14815949 (-) // 22.8 //  
 p13.11///chr16:29059014-29059583 (-) // 22.8 //  
 p11.2///chr16:16439594-16440161 (-) // 22.8 //  
 p13.11///chr16:16482956-16483524 (-) // 22.8 //  
 p13.11  
 chr18:45404666-45404867 (-) // 48.4 // q21.1  
 chr9:99112643-99113069 (-) // 68.13 // q22.32  
 chr5:86676620-86678864 (+) // 67.03 // q14.3  
 chr5:64744294-64744787 (+) // 33.39 // q12.3  
 chr2:101612756-101613287 (+) // 92.19 // q11.2  
 chr5:88063251-88063715 (-) // 97.89 // q14.3  
 chr16:22385997-22387592 (+) // 62.44 // p12.2  
 chr10:114843460-114846520 (+) // 64.65 // q25.2  
 chr12:51747167-51773565 (-) // 78.24 // q13.13  
 chr20:43615920-43616399 (+) // 76.28 // q13.12  
 chr1:63063204-63066800 (-) // 99.42 // p31.3  
 chr8:123933928-123934515 (+) // 54.35 // q24.13  
 chr2:238651062-238651667 (+) // 97.27 // q37.3

|              |                   |           |           |           |    |
|--------------|-------------------|-----------|-----------|-----------|----|
| 204348_s_at  | AK4///LOC10050785 | 3.7587798 | 1.9102644 | 3.7587798 | up |
| 243418_at    |                   | 3.7545323 | 1.9086332 | 3.7545323 | up |
| 219693_at    | AGPAT4            | 3.7541215 | 1.9084754 | 3.7541215 | up |
| 216171_at    |                   | 3.7516105 | 1.90751   | 3.7516105 | up |
| 244860_at    |                   | 3.7498755 | 1.9068427 | 3.7498755 | up |
| 234260_at    |                   | 3.7459242 | 1.9053217 | 3.7459242 | up |
| 227062_at    | MIR612///NEAT1    | 3.7403703 | 1.9031811 | 3.7403703 | up |
| 236398_s_at  | OTTHUMG00000038   | 3.7382267 | 1.902354  | 3.7382267 | up |
| 229642_at    | ARHGEF7           | 3.7290761 | 1.8988183 | 3.7290761 | up |
| 231329_at    |                   | 3.719227  | 1.8950028 | 3.719227  | up |
| 242068_at    |                   | 3.7122679 | 1.8923008 | 3.7122679 | up |
| 1570042_a_at | ADAM9             | 3.7088711 | 1.8909801 | 3.7088711 | up |
| 243157_at    |                   | 3.6996727 | 1.8873976 | 3.6996727 | up |
| 1555326_a_at | ADAM9             | 3.694177  | 1.885253  | 3.694177  | up |
| 241435_at    |                   | 3.6896021 | 1.8834653 | 3.6896021 | up |
| 207477_at    |                   | 3.6882591 | 1.88294   | 3.6882591 | up |
| 226001_at    | KLHL5             | 3.6842415 | 1.8813677 | 3.6842415 | up |
| 1556732_at   | EML4              | 3.6811874 | 1.8801712 | 3.6811874 | up |
| 235786_at    |                   | 3.6811311 | 1.8801491 | 3.6811311 | up |
| 222299_x_at  |                   | 3.678732  | 1.8792086 | 3.678732  | up |
| 1564424_at   |                   | 3.6753678 | 1.8778887 | 3.6753678 | up |
| 238412_at    | RRN3P3            | 3.6630974 | 1.873064  | 3.6630974 | up |
| 213353_at    | ABCA5             | 3.6626894 | 1.8729033 | 3.6626894 | up |
| 215878_at    | ITGB1             | 3.6605642 | 1.872066  | 3.6605642 | up |
| 215002_at    | LOC101060275///LO | 3.6601665 | 1.8719093 | 3.6601665 | up |
| 231775_at    | TNFRSF10A         | 3.6563492 | 1.8704039 | 3.6563492 | up |
| 243915_at    |                   | 3.6549    | 1.8698319 | 3.6549    | up |

chr1:65613906-65692698 (+) // 99.0 //  
p31.3///chr17:29672352-29674044 (+) // 97.01 //  
q11.2///chr12:31767865-31769517 (-) // 94.61 //  
p11.21

chr6:161557106-161695037 (-) // 99.15 // q26  
chr7:132493886-132496104 (+) // 39.55 // q32.3  
chr11:116903406-116904338 (-) // 65.01 // q23.3  
chr5:130708922-130710221 (+) // 28.11 // q31.1  
chr11:65195730-65196514 (+) // 67.47 // q13.1  
chr1:235095412-235098846 (-) // 94.33 // q42.3  
chr13:111944834-111946326 (+) // 96.48 // q34  
chr3:4771520-4771900 (+) // 96.2 // p26.1  
chr2:32686680-32687107 (+) // 50.11 // p22.3  
chr8:38854504-38873535 (+) // 84.4 // p11.22  
chr8:11723513-11724120 (-) // 81.88 // p23.1  
chr8:38854549-38961235 (+) // 100.0 // p11.22  
chr11:128379468-128379938 (-) // 53.4 // q24.3  
chr2:15636730-15638485 (+) // 32.69 // p24.3  
chr4:39064545-39124043 (+) // 94.21 // p14  
chr2:42545076-42547145 (+) // 65.46 // p21

chr11:33060086-33060553 (+) // 7.65 // p13  
chr7:158501449-158571509 (-) // 42.89 // q36.3  
chr16:22430835-22431335 (-) // 65.16 // p12.2  
chr17:67242653-67255899 (-) // 95.18 // q24.3  
chr10:33195872-33197373 (-) // 63.81 // p11.22  
chr16:29502454-29882109 (-) // 61.73 //  
p11.2///chr16:30242427-30246902 (-) // 61.73 //  
p11.2///chr16:21421920-21426408 (-) // 61.73 //  
p12.2///chr16:29400917-29405399 (-) // 61.73 //  
p11.2  
chr8:23048579-23082629 (-) // 78.95 // p21.3  
chr17:66240609-66241342 (+) // 31.45 // q24.2



|              |                          |           |           |              |                                                 |
|--------------|--------------------------|-----------|-----------|--------------|-------------------------------------------------|
| 229280_s_at  | <i>LINC00340</i>         | 3.6467698 | 1.8666191 | 3.6467698 up | chr6:21666674-22195162 (+) // 76.4 // p22.3     |
| 225239_at    | <i>MIR612//NEAT1</i>     | 3.645046  | 1.865937  | 3.645046 up  | chr11:65206882-65208335 (+) // 35.59 // q13.1   |
| 233212_at    |                          | 3.6423488 | 1.8648691 | 3.6423488 up | chr3:114341288-114343205 (+) // 98.21 // q13.31 |
| 212314_at    | <i>SEL1L3</i>            | 3.6337245 | 1.861449  | 3.6337245 up | chr4:25749051-25864345 (-) // 98.18 // p15.2    |
| 240773_at    |                          | 3.632724  | 1.8610518 | 3.632724 up  | chr5:14424307-14424591 (+) // 95.95 // p15.2    |
| 239639_at    | <i>OTTHUMG00000177</i>   | 3.6310775 | 1.8603977 | 3.6310775 up | chr17:77800940-77801496 (+) // 36.62 // q25.3   |
| 243583_at    |                          | 3.6291394 | 1.8596275 | 3.6291394 up | chr10:114739621-114740344 (-) // 95.85 // q25.2 |
| 1552480_s_at | <i>PTPRC</i>             | 3.628038  | 1.8591895 | 3.628038 up  | chr1:198608225-198662332 (+) // 83.18 // q31.3  |
| 1560893_at   |                          | 3.6265903 | 1.8586137 | 3.6265903 up | chr10:114716294-114716950 (+) // 89.15 // q25.2 |
| 233302_at    |                          | 3.6250155 | 1.8579872 | 3.6250155 up | chr14:99689189-99691908 (-) // 80.88 // q32.2   |
| 1559401_a_at |                          | 3.6216874 | 1.856662  | 3.6216874 up | chr15:64850581-64854954 (+) // 66.63 // q22.31  |
| 224917_at    | <i>MIR21//VMP1</i>       | 3.6167219 | 1.8546827 | 3.6167219 up | chr17:57918691-57919727 (+) // 95.07 // q23.1   |
| 226538_at    | <i>MAN2A1</i>            | 3.6128504 | 1.8531375 | 3.6128504 up | chr5:109204151-109205325 (+) // 93.16 // q21.3  |
|              |                          |           |           |              | chr10:121485608-121588652 (+) // 94.05 //       |
| 203607_at    | <i>INPP5F</i>            | 3.6021106 | 1.8488425 | 3.6021106 up | q26.11                                          |
| 213566_at    | <i>RNASE6</i>            | 3.6019902 | 1.8487942 | 3.6019902 up | chr14:21249243-21250620 (+) // 96.05 // q11.2   |
|              |                          |           |           |              | chr1:120909356-120910251 (+) // 95.81 //        |
|              |                          |           |           |              | p11.2//chr1:149394978-149395875 (-) // 96.24 // |
|              |                          |           |           |              | q21.2//chr1:149779980-149780875 (-) // 95.16 // |
|              |                          |           |           |              | q21.2                                           |
| 1559889_at   |                          | 3.59661   | 1.8466377 | 3.59661 up   | chr1:35331037-35350617 (-) // 90.09 // p34.3    |
| 231151_at    | <i>DLGAP3</i>            | 3.592443  | 1.8449652 | 3.592443 up  | chrX:153322778-153323186 (-) // 24.78 // q28    |
| 1569929_at   |                          | 3.5911715 | 1.8444545 | 3.5911715 up | chr6:157347791-157348257 (+) // 72.16 // q25.3  |
| 239674_at    |                          | 3.590918  | 1.8443527 | 3.590918 up  | chr7:158546310-158547028 (-) // 77.46 // q36.3  |
| 235912_at    |                          | 3.5902464 | 1.8440828 | 3.5902464 up | chr4:74902313-74904405 (-) // 92.86 // q13.3    |
| 207850_at    | <i>CXCL3</i>             | 3.5897958 | 1.8439018 | 3.5897958 up | chr3:4818753-4819472 (+) // 93.86 // p26.1      |
| 240052_at    | <i>ITPR1</i>             | 3.5840952 | 1.841609  | 3.5840952 up | chr1:2241285-2241652 (+) // 85.15 // p36.33     |
| 229265_at    | <i>SKI</i>               | 3.5829098 | 1.8411317 | 3.5829098 up | chr9:35658873-35660404 (-) // 41.44 // p13.3    |
| 230521_at    | <i>ARHGEF39</i>          | 3.576632  | 1.8386017 | 3.576632 up  | chr11:116873025-116873465 (-) // 77.01 // q23.3 |
| 243473_at    |                          | 3.5686085 | 1.8353616 | 3.5686085 up | chr19:39228923-39230497 (+) // 40.31 // q13.2   |
| 1560063_a_at | <i>CTD-2540F13.2//OT</i> | 3.5683486 | 1.8352566 | 3.5683486 up | chrX:117861558-117928496 (+) // 90.81 // q24    |
| 201887_at    | <i>IL13RA1</i>           | 3.5672338 | 1.8348057 | 3.5672338 up | chr6:158097768-158099177 (+) // 90.4 // q25.3   |
| 235133_at    | <i>ZDHHC14</i>           | 3.5664816 | 1.8345015 | 3.5664816 up | chr12:8071826-8088871 (-) // 89.96 // p13.31    |
| 202499_s_at  | <i>SLC2A3</i>            | 3.5650635 | 1.8339278 | 3.5650635 up | chr5:14404793-14405200 (+) // 97.06 // p15.2    |
| 240399_at    |                          | 3.564019  | 1.833505  | 3.564019 up  |                                                 |

|              |                         |           |           |              |                                                 |
|--------------|-------------------------|-----------|-----------|--------------|-------------------------------------------------|
| 240538_at    |                         | 3.5628247 | 1.8330215 | 3.5628247 up | chr8:6560990-6561550 (-) // 51.24 // p23.1      |
| 238032_at    |                         | 3.5606608 | 1.832145  | 3.5606608 up | chr1:12674727-12675378 (-) // 95.8 // p36.22    |
| 206275_s_at  | <i>MICAL2</i>           | 3.5584037 | 1.8312302 | 3.5584037 up | chr11:12132157-12285335 (+) // 98.4 // p15.3    |
| 223454_at    | <i>CXCL16</i>           | 3.556813  | 1.8305851 | 3.556813 up  | chr17:4636835-4642735 (-) // 73.72 // p13.2     |
| 240106_at    | <i>GNPTAB</i>           | 3.5544298 | 1.8296181 | 3.5544298 up | chr12:102159538-102159965 (-) // 93.93 // q23.2 |
| 229497_at    | <i>ANKDD1A</i>          | 3.55264   | 1.8288915 | 3.55264 up   | chr15:65250574-65251033 (+) // 41.26 // q22.31  |
| 1559723_s_at |                         | 3.547828  | 1.826936  | 3.547828 up  | chr9:97634646-97637638 (+) // 92.95 // q22.32   |
| 205193_at    | <i>MAFF</i>             | 3.5475233 | 1.8268121 | 3.5475233 up | chr22:38598017-38612510 (+) // 77.3 // q13.1    |
| 216056_at    | <i>CD44</i>             | 3.541273  | 1.8242681 | 3.541273 up  | chr11:35231601-35232074 (+) // 55.81 // p13     |
| 241705_at    | <i>ABCA5</i>            | 3.5397747 | 1.8236575 | 3.5397747 up | chr17:67302884-67323290 (+) // 96.08 // q24.3   |
| 232234_at    | <i>SLA2</i>             | 3.5368505 | 1.8224652 | 3.5368505 up | chr20:35240662-35274582 (-) // 88.02 // q11.23  |
| 216178_x_at  | <i>ITGB1</i>            | 3.5367749 | 1.8224344 | 3.5367749 up | chr10:33190474-33197373 (-) // 90.44 // p11.22  |
| 1561166_a_at |                         | 3.536043  | 1.8221358 | 3.536043 up  | chr3:71313069-71313421 (-) // 60.99 // p13      |
| 236670_s_at  |                         | 3.5356355 | 1.8219695 | 3.5356355 up | chr7:151553971-151554224 (-) // 96.15 // q36.1  |
| 226552_at    | <i>IER5L</i>            | 3.5330503 | 1.8209143 | 3.5330503 up | chr9:131937828-131939852 (-) // 82.65 // q34.11 |
| 1558534_at   | <i>LOC100271836//LO</i> | 3.5328944 | 1.8208506 | 3.5328944 up | chr16:21483650-21923026 (-) // 87.28 // p12.2   |
| 210221_at    | <i>CHRNA3</i>           | 3.5289865 | 1.8192539 | 3.5289865 up | chr15:78887651-78913322 (-) // 78.64 // q25.1   |
| 220169_at    | <i>TMEM156</i>          | 3.5286863 | 1.8191311 | 3.5286863 up | chr4:38968442-39034041 (-) // 83.94 // p14      |
| 222357_at    | <i>ZBTB20</i>           | 3.5238347 | 1.8171463 | 3.5238347 up | chr3:114406054-114406402 (-) // 60.84 // q13.31 |
| 232943_at    |                         | 3.5229824 | 1.8167973 | 3.5229824 up | chr6:38434068-38436269 (+) // 61.38 // p21.2    |
| 224508_at    | <i>MGC12916</i>         | 3.5216594 | 1.8162553 | 3.5216594 up | chr17:14207170-14208822 (+) // 98.39 // p12     |
| 1566477_at   |                         | 3.5215633 | 1.816216  | 3.5215633 up | chr22:43199182-43202649 (-) // 64.38 // q13.2   |
| 203196_at    | <i>ABCC4</i>            | 3.512779  | 1.8126128 | 3.512779 up  | chr13:95672089-95953683 (-) // 98.2 // q32.1    |
| 238619_at    |                         | 3.509958  | 1.8114538 | 3.509958 up  | chr7:130614967-130616209 (-) // 99.36 // q32.3  |
| 232868_at    | <i>EQTN</i>             | 3.5098171 | 1.8113959 | 3.5098171 up | chr9:27284665-27297137 (-) // 98.08 // p21.2    |
| 222895_s_at  | <i>BCL11B</i>           | 3.5075538 | 1.8104652 | 3.5075538 up | chr14:99635626-99737822 (-) // 91.86 // q32.2   |
| 243213_at    | <i>STAT3</i>            | 3.5072744 | 1.8103503 | 3.5072744 up | chr17:40539050-40539480 (-) // 99.77 // q21.2   |
| 232876_at    |                         | 3.5014431 | 1.8079497 | 3.5014431 up | chr6:36079053-36081120 (+) // 72.35 // p21.31   |
| 238361_s_at  |                         | 3.4994073 | 1.8071105 | 3.4994073 up | chr7:151553971-151554214 (+) // 92.69 // q36.1  |
| 233376_at    |                         | 3.496109  | 1.8057501 | 3.496109 up  | chr6:86377640-86380771 (-) // 14.03 // q14.3    |
| 201785_at    | <i>RNASE1</i>           | 3.4952817 | 1.8054087 | 3.4952817 up | chr14:21269618-21270990 (-) // 46.42 // q11.2   |
| 229395_at    | <i>STX4</i>             | 3.4894037 | 1.8029805 | 3.4894037 up | chr16:31045339-31046197 (+) // 69.78 // p11.2   |
| 1554113_a_at | <i>SLC4A8</i>           | 3.4892013 | 1.8028969 | 3.4892013 up | chr12:51818624-51868361 (+) // 99.09 // q13.13  |
| 58696_at     | <i>EXOSC4</i>           | 3.4873142 | 1.8021164 | 3.4873142 up | chr8:145133562-145135551 (+) // 89.61 // q24.3  |

|              |                         |           |           |              |                                                  |
|--------------|-------------------------|-----------|-----------|--------------|--------------------------------------------------|
| 242755_at    |                         | 3.4784412 | 1.7984409 | 3.4784412 up | chr7:104965208-104965934 (+) // 45.04 // q22.3   |
| 213493_at    | <i>SNED1</i>            | 3.477087  | 1.7978792 | 3.477087 up  | chr2:242031858-242034982 (+) // 93.73 // q37.3   |
| 230387_at    |                         | 3.473942  | 1.7965736 | 3.473942 up  |                                                  |
|              |                         |           |           |              | chr16:22504092-22505785 (+) // 61.13 //          |
|              |                         |           |           |              | p12.2///chr16:21455759-21457452 (-) // 61.13 //  |
|              |                         |           |           |              | p12.2///chr16:21888021-21889714 (-) // 61.13 //  |
|              |                         |           |           |              | p12.2///chr16:29536243-29537939 (-) // 62.03 //  |
|              |                         |           |           |              | p11.2///chr16:30276227-30277923 (-) // 60.97 //  |
|              |                         |           |           |              | p11.2///chr16:70251128-70252829 (-) // 59.41 //  |
|              |                         |           |           |              | q22.1///chr16:29434501-29436179 (-) // 58.67 //  |
|              |                         |           |           |              | p11.2                                            |
| 238449_at    | <i>LOC595101</i>        | 3.473714  | 1.796479  | 3.473714 up  | chr3:190252077-190254598 (-) // 73.32 // q28     |
| 1562468_at   |                         | 3.4722452 | 1.7958689 | 3.4722452 up | chr10:30725044-30725631 (+) // 88.87 // p11.23   |
| 235421_at    | <i>MAP3K8</i>           | 3.4696162 | 1.7947761 | 3.4696162 up | chr1:112188585-112189071 (+) // 97.37 // p13.2   |
| 243527_at    |                         | 3.4691846 | 1.7945967 | 3.4691846 up | chr5:67585135-67585587 (+) // 94.36 // q13.1     |
| 239476_at    |                         | 3.4630203 | 1.7920308 | 3.4630203 up | chr1:169076003-169101954 (+) // 95.34 // q24.2   |
| 201243_s_at  | <i>ATP1B1</i>           | 3.4556415 | 1.7889535 | 3.4556415 up | chr4:39104903-39117952 (+) // 80.16 // p14       |
| 233866_at    | <i>KLHL5</i>            | 3.453162  | 1.787918  | 3.453162 up  | chr4:83404959-83417303 (-) // 85.32 // q21.22    |
| 231923_at    | <i>TMEM150C</i>         | 3.4516804 | 1.7872989 | 3.4516804 up | chr10:97515966-97626282 (+) // 100.0 // q24.1    |
| 209474_s_at  | <i>ENTPD1</i>           | 3.4435837 | 1.7839108 | 3.4435837 up | chr7:38276165-38279124 (-) // 54.6 // p14.1      |
| 234186_at    |                         | 3.442546  | 1.7834759 | 3.442546 up  | chr15:67496235-67497137 (-) // 52.97 // q22.33   |
| 243284_at    | <i>AAGAB</i>            | 3.4417682 | 1.78315   | 3.4417682 up | chr12:96672020-96673090 (-) // 90.51 // q23.1    |
| 221918_at    | <i>CDK17</i>            | 3.441462  | 1.7830216 | 3.441462 up  | chr1:65613858-65694611 (+) // 95.26 // p31.3     |
| 204347_at    | <i>AK4//LOC10050785</i> | 3.43947   | 1.7821863 | 3.43947 up   | chr8:134507178-134509435 (-) // 59.28 // q24.22  |
| 215874_at    |                         | 3.438649  | 1.7818419 | 3.438649 up  | chr2:134933146-134933909 (-) // 93.97 // q21.2   |
| 242885_at    |                         | 3.4382057 | 1.7816559 | 3.4382057 up | chr12:1438186-1529030 (+) // 32.29 // p13.33     |
| 1557738_at   |                         | 3.4380412 | 1.7815869 | 3.4380412 up | chr2:64319994-64339483 (-) // 64.46 // p14       |
| 218319_at    | <i>PELI1</i>            | 3.4371452 | 1.7812108 | 3.4371452 up | chr3:190282078-190348071 (+) // 80.61 // q28     |
| 210233_at    | <i>IL1RAP</i>           | 3.4362924 | 1.7808528 | 3.4362924 up | chr14:55089745-55090223 (+) // 53.6 // q22.2     |
| 230503_at    |                         | 3.4360294 | 1.7807424 | 3.4360294 up | chr9:69651360-69665400 (+) // 97.63 //           |
|              |                         |           |           |              | q21.11///chr9:67289409-67303437 (+) // 97.28 //  |
|              |                         |           |           |              | q13///chr9:67016948-67030982 (-) // 97.48 //     |
|              |                         |           |           |              | q13///chr9:42843943-42857993 (-) // 97.38 // p12 |
| 1564280_x_at | <i>LOC100133920</i>     | 3.4359574 | 1.7807121 | 3.4359574 up | chr12:11921815-11923835 (+) // 92.01 // p13.2    |
| 232685_at    |                         | 3.435607  | 1.780565  | 3.435607 up  |                                                  |

|              |                          |           |           |              |                                                 |
|--------------|--------------------------|-----------|-----------|--------------|-------------------------------------------------|
| 238403_at    |                          | 3.4340909 | 1.7799282 | 3.4340909 up | chr11:78029280-78029432 (-) // 66.09 // q14.1   |
| 212779_at    | <i>KIAA1109</i>          | 3.4299488 | 1.778187  | 3.4299488 up | chr4:123207802-123283907 (+) // 98.64 // q27    |
| 209710_at    | <i>GATA2</i>             | 3.427391  | 1.7771108 | 3.427391 up  | chr3:128198269-128206765 (-) // 98.09 // q21.3  |
| 239387_at    |                          | 3.4244652 | 1.7758787 | 3.4244652 up | chr11:75850599-75851034 (+) // 63.62 // q13.5   |
| 236216_at    |                          | 3.4179597 | 1.7731354 | 3.4179597 up | chr10:114748705-114749120 (+) // 76.16 // q25.2 |
| 202497_x_at  | <i>SLC2A3</i>            | 3.417367  | 1.7728852 | 3.417367 up  | chr12:8071825-8088871 (-) // 89.03 // p13.31    |
| 226213_at    | <i>ERBB3</i>             | 3.4162905 | 1.7724307 | 3.4162905 up | chr12:56496681-56497291 (+) // 87.37 // q13.2   |
| 233830_at    | <i>LOC90246</i>          | 3.4154742 | 1.7720859 | 3.4154742 up | chr3:128226985-128229427 (-) // 24.24 // q21.3  |
| 235751_s_at  | <i>VMO1</i>              | 3.415275  | 1.7720017 | 3.415275 up  | chr17:4688580-4689727 (-) // 90.66 // p13.2     |
| 210656_at    | <i>EED</i>               | 3.4146852 | 1.7717526 | 3.4146852 up | chr11:85956181-85989777 (+) // 97.34 // q14.2   |
| 216062_at    | <i>OTTHUMG00000166</i>   | 3.413676  | 1.7713262 | 3.413676 up  | chr11:35231601-35232074 (-) // 55.81 // p13     |
| 229130_at    | <i>OTTHUMG00000166</i>   | 3.41307   | 1.77107   | 3.41307 up   | chr4:8356823-8358443 (-) // 70.95 // p16.1      |
| 218881_s_at  | <i>FOSL2</i>             | 3.4101207 | 1.7698228 | 3.4101207 up | chr2:28635790-28637514 (+) // 94.67 // p23.2    |
| 202498_s_at  | <i>SLC2A3</i>            | 3.409615  | 1.7696089 | 3.409615 up  | chr12:8071825-8088871 (-) // 89.03 // p13.31    |
| 204547_at    | <i>RAB40B</i>            | 3.4091516 | 1.7694128 | 3.4091516 up | chr17:80614948-80656513 (-) // 99.58 // q25.3   |
| 242514_at    |                          | 3.406132  | 1.7681344 | 3.406132 up  | chr7:2803895-2804222 (-) // 63.36 // p22.2      |
| 234411_x_at  | <i>CD44</i>              | 3.405575  | 1.7678984 | 3.405575 up  | chr11:35232694-35232796 (+) // 100.0 // p13     |
| 1554442_at   | <i>BEST1</i>             | 3.4051316 | 1.7677106 | 3.4051316 up | chr11:61717841-61731518 (+) // 91.33 // q12.3   |
| 206474_at    | <i>CDK17</i>             | 3.4021347 | 1.7664403 | 3.4021347 up | chr12:96673922-96793798 (-) // 96.38 // q23.1   |
| 1561846_s_at | <i>CCDC168</i>           | 3.4017544 | 1.766279  | 3.4017544 up | chr13:103381716-103386935 (-) // 97.45 // q33.1 |
| 201888_s_at  | <i>IL13RA1</i>           | 3.4016936 | 1.7662532 | 3.4016936 up | chrX:117861564-117926198 (+) // 98.13 // q24    |
| 232835_at    |                          | 3.4016125 | 1.7662188 | 3.4016125 up | chr6:15262649-15265601 (+) // 62.66 // p22.3    |
| 224480_s_at  | <i>AGPAT9</i>            | 3.3997784 | 1.7654407 | 3.3997784 up | chr4:84518585-84527025 (+) // 95.86 // q21.23   |
| 219999_at    | <i>MAN2A2</i>            | 3.3979886 | 1.764681  | 3.3979886 up | chr15:91464918-91465807 (+) // 28.39 // q26.1   |
| 222023_at    | <i>AKAP13</i>            | 3.3974257 | 1.764442  | 3.3974257 up | chr15:86285225-86287180 (+) // 94.96 // q25.3   |
| 214947_at    | <i>FAM105A</i>           | 3.3955894 | 1.763662  | 3.3955894 up | chr5:14614704-14616285 (+) // 87.66 // p15.2    |
| 233393_at    |                          | 3.3919976 | 1.7621351 | 3.3919976 up | chr8:10274757-10276325 (+) // 87.48 // p23.1    |
| 231403_at    | <i>TRIO</i>              | 3.3915713 | 1.7619538 | 3.3915713 up | chr5:14482193-14482574 (+) // 90.29 // p15.2    |
| 222860_s_at  | <i>PDGFD</i>             | 3.3898919 | 1.7612393 | 3.3898919 up | chr11:103780262-104034811 (-) // 99.86 // q22.3 |
|              |                          |           |           |              | chr2:110551739-110590594 (+) // 87.31 //        |
|              |                          |           |           |              | q13///chr2:111296066-111334904 (-) // 87.31 //  |
|              |                          |           |           |              | q13///chr2:113150629-113191330 (-) // 87.19 //  |
|              |                          |           |           |              | q13                                             |
| 211324_s_at  | <i>RGPD3///RGPD4///R</i> | 3.386979  | 1.759999  | 3.386979 up  | chr11:2717136-2717696 (-) // 18.34 // p15.5     |
| 244727_at    | <i>KCNQ1OT1</i>          | 3.3861253 | 1.7596353 | 3.3861253 up |                                                 |

|             |                       |           |           |              |                                                                                               |
|-------------|-----------------------|-----------|-----------|--------------|-----------------------------------------------------------------------------------------------|
| 215477_at   |                       | 3.3833942 | 1.7584713 | 3.3833942 up | chr7:32699777-32700952 (-) // 83.78 // p14.3                                                  |
| 230004_at   | <i>USP24</i>          | 3.3813248 | 1.7575886 | 3.3813248 up | chr1:55537033-55537991 (-) // 98.97 // p32.3                                                  |
| 202454_s_at | <i>ERBB3</i>          | 3.380037  | 1.7570391 | 3.380037 up  | chr12:56473886-56496587 (+) // 94.87 // q13.2                                                 |
| 1565868_at  | <i>CD44</i>           | 3.3785121 | 1.7563881 | 3.3785121 up | chr11:35234096-35235544 (+) // 77.26 // p13                                                   |
| 234004_at   | <i>TTC28</i>          | 3.3767743 | 1.7556458 | 3.3767743 up | chr22:28559079-28559587 (-) // 99.41 // q12.1                                                 |
| 234989_at   | <i>MIR612///NEAT1</i> | 3.375536  | 1.7551166 | 3.375536 up  | chr11:65199206-65200407 (+) // 35.11 // q13.1                                                 |
| 1556797_at  | <i>RNF144A-AS1</i>    | 3.3730075 | 1.7540356 | 3.3730075 up | chr2:7052407-7056043 (-) // 28.35 // p25.2                                                    |
| 215635_at   |                       | 3.370045  | 1.7527678 | 3.370045 up  | chr15:85526717-85528153 (+) // 77.79 // q25.3                                                 |
| 227439_at   | <i>ANKS1B</i>         | 3.36506   | 1.7506323 | 3.36506 up   | chr12:99138036-99194959 (-) // 98.27 // q23.1                                                 |
| 243054_at   |                       | 3.3623507 | 1.7494702 | 3.3623507 up | chr10:188908-189467 (+) // 98.41 // p15.3                                                     |
| 230775_s_at | <i>SPG20</i>          | 3.3623383 | 1.7494649 | 3.3623383 up | chr13:36909514-36920419 (+) // 100.0 // q13.3                                                 |
| 1566115_at  |                       | 3.3619025 | 1.7492778 | 3.3619025 up | chr18:55819618-55822545 (+) // 56.68 // q21.31                                                |
| 219991_at   | <i>SLC2A9</i>         | 3.3615913 | 1.7491443 | 3.3615913 up | chr4:9827849-10023107 (-) // 97.64 // p16.1                                                   |
| 241069_at   |                       | 3.3594253 | 1.7482145 | 3.3594253 up | chr11:113942017-113942683 (-) // 80.23 // q23.2                                               |
| 238413_at   | <i>RRN3P3</i>         | 3.3590257 | 1.7480428 | 3.3590257 up | chr16:22430835-22431335 (+) // 65.16 // p12.2                                                 |
| 212311_at   | <i>SEL1L3</i>         | 3.3579285 | 1.7475715 | 3.3579285 up | chr4:25749051-25864345 (-) // 98.18 // p15.2                                                  |
|             |                       |           |           |              | chr10:121551026-121551718 (+) // 96.89 // q26.11                                              |
| 230363_s_at | <i>INPP5F</i>         | 3.3527324 | 1.7453374 | 3.3527324 up | chr11:116906746-116907389 (-) // 74.96 // q23.3                                               |
| 236621_at   | <i>RPS27</i>          | 3.3498597 | 1.7441007 | 3.3498597 up | chr13:111946532-111947538 (+) // 98.92 // q34                                                 |
| 242999_at   | <i>ARHGEF7</i>        | 3.3497517 | 1.7440542 | 3.3497517 up | chr14:65858167-65858496 (+) // 14.73 // q23.3                                                 |
| 217695_x_at |                       | 3.347867  | 1.7432423 | 3.347867 up  | chr7:26734096-26734894 (-) // 97.79 // p15.2                                                  |
| 242598_at   |                       | 3.3457134 | 1.7423139 | 3.3457134 up | chr2:29381873-29382566 (+) // 65.89 // p23.2                                                  |
| 242710_at   |                       | 3.3453317 | 1.7421492 | 3.3453317 up | chr11:61717847-61731919 (+) // 99.95 // q12.3                                                 |
| 207671_s_at | <i>BEST1</i>          | 3.3442326 | 1.7416751 | 3.3442326 up | chr20:37467955-37469996 (+) // 39.75 // q11.23                                                |
| 233813_at   | <i>PPP1R16B</i>       | 3.3441467 | 1.7416382 | 3.3441467 up | chr1:35327385-35329407 (-) // 23.78 // p34.3                                                  |
| 1559630_at  |                       | 3.3433738 | 1.7413046 | 3.3433738 up | chrX:138663928-138724887 (+) // 99.73 // q27.1                                                |
| 214884_at   | <i>MCF2</i>           | 3.3424346 | 1.7408993 | 3.3424346 up | chr12:1901125-1965394 (-) // 87.49 // p13.33                                                  |
| 228083_at   | <i>CACNA2D4</i>       | 3.332337  | 1.7365342 | 3.332337 up  | chr1:145260279-145263769 (+) // 80.35 // q21.1///chr1:120557633-120561124 (-) // 78.96 // p12 |
|             |                       |           |           |              | chr12:9910668-9911147 (-) // 97.76 // p13.31                                                  |
| 1557543_at  |                       | 3.331892  | 1.7363416 | 3.331892 up  | chr16:90028480-90034467 (+) // 94.31 // q24.3                                                 |
| 237009_at   |                       | 3.326445  | 1.7339813 | 3.326445 up  | chr17:76783469-76836887 (-) // 94.28 // q25.3                                                 |
| 225637_at   | <i>DEF8</i>           | 3.3217874 | 1.7319597 | 3.3217874 up |                                                                                               |
| 220370_s_at | <i>USP36</i>          | 3.3212032 | 1.731706  | 3.3212032 up |                                                                                               |

|              |                     |           |           |              |                                                  |
|--------------|---------------------|-----------|-----------|--------------|--------------------------------------------------|
| 243512_x_at  |                     | 3.319684  | 1.731046  | 3.319684 up  | chr7:110843640-110844015 (-) // 99.21 // q31.1   |
| 237556_at    |                     | 3.3196604 | 1.7310357 | 3.3196604 up |                                                  |
| 1562453_at   |                     | 3.3193986 | 1.7309219 | 3.3193986 up | chr2:165685629-165688230 (-) // 82.2 // q24.3    |
| 213596_at    | <i>CASP4</i>        | 3.3157036 | 1.729315  | 3.3157036 up | chr11:104813596-104822710 (-) // 68.25 // q22.3  |
| 202381_at    | <i>ADAM9</i>        | 3.3147135 | 1.7288842 | 3.3147135 up | chr8:38854504-38962520 (+) // 99.3 // p11.22     |
| 234474_x_at  | <i>IL6ST</i>        | 3.3144994 | 1.728791  | 3.3144994 up | chr5:55244705-55247334 (+) // 88.89 // q11.2     |
| 244457_at    |                     | 3.310221  | 1.7269275 | 3.310221 up  | chr12:26798902-26799548 (-) // 86.86 // p11.23   |
| 214446_at    | <i>ELL2</i>         | 3.309249  | 1.7265038 | 3.309249 up  | chr5:95224518-95297486 (-) // 98.09 // q15       |
| 227983_at    | <i>RILPL2</i>       | 3.3069234 | 1.7254896 | 3.3069234 up | chr12:123899931-123920673 (-) // 83.29 // q24.31 |
| 238840_at    | <i>LRRFIP1</i>      | 3.3043275 | 1.7243567 | 3.3043275 up | chr2:238666907-238667494 (+) // 99.83 // q37.3   |
| 215164_at    |                     | 3.3031726 | 1.7238524 | 3.3031726 up | chr18:52950451-52954114 (-) // 62.05 // q21.2    |
| 223391_at    | <i>SGPP1</i>        | 3.3003182 | 1.7226051 | 3.3003182 up | chr14:64150933-64194734 (-) // 94.78 // q23.2    |
| 210311_at    | <i>FGF5</i>         | 3.2964253 | 1.7209024 | 3.2964253 up | chr4:81187828-81212159 (+) // 83.84 // q21.21    |
| 1554158_at   | <i>ZMYND11</i>      | 3.2954    | 1.7204535 | 3.2954 up    | chr10:180642-295201 (+) // 96.15 // p15.3        |
| 214211_at    | <i>FTH1</i>         | 3.2944489 | 1.7200371 | 3.2944489 up | chr11:61731758-61732269 (-) // 71.33 // q12.3    |
| 207744_at    |                     | 3.2907908 | 1.7184343 | 3.2907908 up | chr5:32149097-32150254 (+) // 28.58 // p13.3     |
| 233738_at    |                     | 3.2841008 | 1.7154984 | 3.2841008 up | chr10:12777782-12779878 (+) // 97.71 // p13      |
| 239555_at    |                     | 3.2840962 | 1.7154964 | 3.2840962 up | chr8:56831282-56831581 (+) // 28.57 // q12.1     |
| 217482_at    |                     | 3.283815  | 1.7153728 | 3.283815 up  | chr15:64880471-65258312 (+) // 30.93 // q22.31   |
| 244010_at    |                     | 3.282501  | 1.7147955 | 3.282501 up  | chr7:151991124-151991573 (-) // 70.38 // q36.1   |
| 1567682_x_at | <i>SNORA74A</i>     | 3.28193   | 1.7145444 | 3.28193 up   | chr5:138614468-138614668 (+) // 100.0 // q31.2   |
| 230559_x_at  | <i>FGD4</i>         | 3.2817032 | 1.7144448 | 3.2817032 up | chr12:32798546-32798982 (+) // 62.53 // p11.21   |
| 238086_at    | <i>LOC100129617</i> | 3.279529  | 1.7134887 | 3.279529 up  | chr16:81700478-81700877 (+) // 83.74 // q23.3    |
| 243343_at    |                     | 3.2790806 | 1.7132914 | 3.2790806 up | chr22:29712730-29713196 (-) // 71.18 // q12.2    |
| 1553498_at   |                     | 3.279058  | 1.7132814 | 3.279058 up  | chr6:20452064-20452657 (+) // 3.02 // p22.3      |
| 235847_at    |                     | 3.2788038 | 1.7131696 | 3.2788038 up | chr6:37820715-37821209 (+) // 93.63 // p21.2     |
| 238297_at    |                     | 3.2750814 | 1.7115308 | 3.2750814 up | chr6:13065723-13066184 (+) // 61.94 // p24.1     |
| 236860_at    | <i>NPY6R</i>        | 3.2739458 | 1.7110305 | 3.2739458 up | chr5:137145772-137146440 (+) // 57.04 // q31.2   |
| 237949_at    |                     | 3.2729492 | 1.7105912 | 3.2729492 up | chr12:116485203-116485682 (-) // 99.58 // q24.21 |
| 223723_at    | <i>MF12</i>         | 3.2719755 | 1.7101619 | 3.2719755 up | chr3:196745824-196756642 (-) // 91.17 // q29     |
| 1570192_at   |                     | 3.2716928 | 1.7100372 | 3.2716928 up |                                                  |
| 237164_at    |                     | 3.2690227 | 1.7088594 | 3.2690227 up | chr12:109225162-109225908 (+) // 57.49 // q24.11 |

|              |                   |           |           |              |                                                 |
|--------------|-------------------|-----------|-----------|--------------|-------------------------------------------------|
| 236733_at    |                   | 3.2667367 | 1.7078502 | 3.2667367 up | chr1:51198576-51199037 (-) // 48.09 // p32.3    |
| 1557519_at   |                   | 3.2624245 | 1.7059445 | 3.2624245 up | chr5:130700967-130701356 (-) // 85.33 // q31.1  |
| 229744_at    | SSFA2             | 3.259207  | 1.704521  | 3.259207 up  | chr2:182758544-182759422 (+) // 97.56 // q31.3  |
| 235464_at    | CTB-89H12.4//OTTH | 3.2588308 | 1.7043544 | 3.2588308 up | chr5:148876503-148877690 (-) // 75.78 // q32    |
| 234418_x_at  | CD44              | 3.2580335 | 1.7040014 | 3.2580335 up | chr11:35232694-35232796 (-) // 100.0 // p13     |
| 1553266_at   | CNOT6L            | 3.2528992 | 1.7017261 | 3.2528992 up | chr4:78647158-78740522 (-) // 99.94 // q21.1    |
|              |                   |           |           |              | chr16:21878903-21879490 (+) // 67.4 //          |
|              |                   |           |           |              | p12.2//chr16:21446632-21447216 (+) // 81.73 //  |
|              |                   |           |           |              | p12.2//chr16:29527097-29527684 (+) // 67.09 //  |
|              |                   |           |           |              | p11.2//chr16:30267084-30267668 (+) // 66.93 //  |
|              |                   |           |           |              | p11.2//chr16:29425315-29425897 (+) // 66.46 //  |
|              |                   |           |           |              | p11.2//chr16:22514329-22514913 (-) // 67.24 //  |
|              |                   |           |           |              | p12.2                                           |
| 238342_at    |                   | 3.2522578 | 1.7014416 | 3.2522578 up | chr12:121322310-121322863 (+) // 69.3 // q24.31 |
| 243522_at    |                   | 3.2501144 | 1.7004905 | 3.2501144 up | chr10:13685705-14372883 (-) // 98.26 // p13     |
| 225163_at    | FRMD4A            | 3.2498524 | 1.7003742 | 3.2498524 up | chr6:163894451-163895032 (+) // 5.32 // q26     |
| 1569854_at   |                   | 3.2470908 | 1.6991477 | 3.2470908 up | chr1:204042731-204096863 (+) // 98.21 // q32.1  |
| 209736_at    | SOX13             | 3.243385  | 1.6975003 | 3.243385 up  | chr9:27277548-27279761 (-) // 100.0 // p21.2    |
| 1559292_s_at | LINC00032         | 3.2433789 | 1.6974976 | 3.2433789 up | chr7:38276148-38279124 (+) // 55.11 // p14.1    |
| 234658_at    |                   | 3.2403991 | 1.6961715 | 3.2403991 up | chr4:71850260-71853883 (+) // 78.78 // q13.3    |
| 225997_at    | MOB1B             | 3.2376196 | 1.6949335 | 3.2376196 up | chr3:67061170-67061630 (+) // 95.82 // p14.1    |
| 239835_at    | KBTBD8            | 3.2358253 | 1.6941338 | 3.2358253 up | chr1:120910664-120912800 (+) // 10.63 //        |
|              |                   |           |           |              | p11.2//chr1:149392422-149394565 (-) // 15.2 //  |
|              |                   |           |           |              | q21.2//chr1:149777429-149779567 (-) // 11.23 // |
|              |                   |           |           |              | q21.2                                           |
| 1555968_a_at |                   | 3.2356393 | 1.6940508 | 3.2356393 up | chr1:168009648-168010366 (+) // 67.82 // q24.2  |
| 235613_at    |                   | 3.2348063 | 1.6936793 | 3.2348063 up | chr2:24007585-24011233 (-) // 91.71 // p23.3    |
| 232908_at    | ATAD2B            | 3.234165  | 1.6933932 | 3.234165 up  | chr2:65537984-65659717 (-) // 99.25 // p14      |
| 212458_at    | SPRED2            | 3.2332115 | 1.6929679 | 3.2332115 up | chr1:150544803-150545335 (-) // 46.36 // q21.3  |
| 241722_x_at  |                   | 3.2313735 | 1.6921475 | 3.2313735 up | chr13:74489836-74494758 (+) // 79.7 // q22.1    |
| 1566445_at   |                   | 3.230557  | 1.691783  | 3.230557 up  | chr3:15723201-15723668 (+) // 39.4 // p25.1     |
| 241063_at    |                   | 3.2296517 | 1.6913786 | 3.2296517 up | chr14:22675429-22676025 (+) // 100.0 // q11.2   |
| 234399_at    | TRAV34//TRAV34    | 3.2294815 | 1.6913025 | 3.2294815 up | chr14:23242433-23288958 (-) // 98.04 // q11.2   |
| 204588_s_at  | SLC7A7            | 3.2288232 | 1.6910084 | 3.2288232 up |                                                 |

|              |                  |           |           |              |                                                  |
|--------------|------------------|-----------|-----------|--------------|--------------------------------------------------|
| 1556704_s_at | LOC100133920//LO | 3.2287848 | 1.6909913 | 3.2287848 up | chr9:69650262-69664974 (+) // 95.27 //           |
| 220809_at    | OTTHUMG00000176  | 3.22685   | 1.6901265 | 3.22685 up   | q21.11///chr9:67288321-67303011 (+) // 94.34 //  |
| 228702_at    | FLJ43663         | 3.2265036 | 1.6899717 | 3.2265036 up | q13///chr9:42844369-42859085 (-) // 95.73 //     |
| 229221_at    | CD44             | 3.2249029 | 1.6892557 | 3.2249029 up | p12///chr9:67017374-67032072 (-) // 95.27 // q13 |
| 1562373_at   |                  | 3.2245646 | 1.6891043 | 3.2245646 up | chr16:81601414-81606948 (+) // 58.31 // q23.2    |
|              |                  |           |           |              | chr7:130628925-130629917 (-) // 95.83 // q32.3   |
|              |                  |           |           |              | chr11:35226609-35229711 (+) // 99.04 // p13      |
|              |                  |           |           |              | chr3:4885825-4888806 (-) // 85.65 // p26.1       |
|              |                  |           |           |              | chr2:91732944-91737970 (+) // 42.68 //           |
|              |                  |           |           |              | p11.1///chr2:87593153-87597854 (-) // 42.58 //   |
|              |                  |           |           |              | p11.2///chr2:90296944-90301623 (-) // 42.29 //   |
| 222249_at    |                  | 3.2227414 | 1.6882885 | 3.2227414 up | p11.2                                            |
| 238405_at    |                  | 3.2224815 | 1.6881721 | 3.2224815 up | chr11:78029280-78029432 (+) // 66.09 // q14.1    |
| 220507_s_at  | UPB1             | 3.2204866 | 1.6872787 | 3.2204866 up | chr22:24891311-24922552 (+) // 72.28 // q11.23   |
| 243611_at    | MICALCL          | 3.2198536 | 1.6869951 | 3.2198536 up | chr11:12371422-12380178 (+) // 99.16 // p15.3    |
| 220814_at    |                  | 3.219132  | 1.6866717 | 3.219132 up  | chr12:65022251-65022941 (+) // 13.19 // q14.2    |
|              |                  |           |           |              | chr17:57918708-57919160 (-) // 99.75 //          |
|              |                  |           |           |              | q23.1///chr9:94912827-94913283 (-) // 98.25 //   |
| 231697_s_at  |                  | 3.2191198 | 1.6866663 | 3.2191198 up | q22.31                                           |
| 232307_at    |                  | 3.218493  | 1.6863853 | 3.218493 up  | chr12:116598576-116600425 (-) // 43.67 // q24.21 |
| 232726_at    |                  | 3.2180634 | 1.6861928 | 3.2180634 up | chr4:141023020-141026668 (-) // 79.66 // q31.1   |
| 235805_at    |                  | 3.2179406 | 1.6861377 | 3.2179406 up | chr20:33478202-33478750 (+) // 96.64 // q11.22   |
|              |                  |           |           |              | chr12:7965107-7965839 (-) // 97.84 //            |
|              |                  |           |           |              | p13.31///chr12:8071828-8072848 (-) // 92.32 //   |
| 222088_s_at  | SLC2A14//SLC2A3  | 3.2177222 | 1.6860398 | 3.2177222 up | p13.31                                           |
| 1560237_at   |                  | 3.2165415 | 1.6855103 | 3.2165415 up | chr16:22391386-22393159 (-) // 62.71 // p12.2    |
| 240676_at    |                  | 3.2129312 | 1.6838901 | 3.2129312 up | chr16:67153610-67153917 (-) // 35.94 // q22.1    |
| 1563469_at   |                  | 3.2124581 | 1.6836777 | 3.2124581 up | chr10:63836873-63843071 (+) // 84.78 // q21.2    |
| 227093_at    | USP36            | 3.2122352 | 1.6835775 | 3.2122352 up | chr17:76791733-76795066 (-) // 97.21 // q25.3    |
| 243638_at    |                  | 3.2109609 | 1.6830051 | 3.2109609 up | chr6:163881349-163881741 (+) // 100.0 // q26     |
| 239780_at    |                  | 3.208153  | 1.6817429 | 3.208153 up  | chr1:10358721-10359143 (+) // 32.4 // p36.22     |
| 222368_at    |                  | 3.207361  | 1.6813867 | 3.207361 up  | chr3:75585613-75586022 (+) // 61.85 // p12.3     |
| 236628_at    |                  | 3.205078  | 1.6803594 | 3.205078 up  | chr2:28454677-28455267 (+) // 48.34 // p23.2     |
| 1569464_at   | PPFIBP1          | 3.204079  | 1.6799097 | 3.204079 up  | chr12:27677074-27790249 (+) // 71.91 // p11.23   |



|              |                   |           |           |              |                                                 |
|--------------|-------------------|-----------|-----------|--------------|-------------------------------------------------|
| 1559342_a_at | LOC100506948///SN | 3.1997168 | 1.6779442 | 3.1997168 up | chr15:25511584-25583506 (+) // 98.49 // q11.2   |
| 237071_at    |                   | 3.199043  | 1.6776404 | 3.199043 up  | chr6:36085740-36086143 (+) // 76.08 // p21.31   |
| 243109_at    | MCTP2             | 3.1952662 | 1.6759361 | 3.1952662 up | chr15:94886878-94887286 (+) // 46.04 // q26.2   |
| 230206_at    | DOCK5             | 3.1912758 | 1.6741333 | 3.1912758 up | chr8:25272438-25273227 (-) // 96.47 // p21.2    |
| 1558653_at   | MLK7-AS1          | 3.1905448 | 1.6738029 | 3.1905448 up | chr2:174062442-174136346 (-) // 77.06 // q31.1  |
| 228488_at    | TBC1D16           | 3.190073  | 1.6735895 | 3.190073 up  | chr17:77906077-77907136 (-) // 99.72 // q25.3   |
| 1564796_at   | EMP1              | 3.1895635 | 1.673359  | 3.1895635 up | chr12:13349719-13350708 (+) // 65.96 // p13.1   |
| 242815_x_at  |                   | 3.1894321 | 1.6732996 | 3.1894321 up | chr10:13678080-13717989 (+) // 47.19 // p13     |
| 1565976_at   |                   | 3.1827762 | 1.6702857 | 3.1827762 up |                                                 |
| 233629_at    |                   | 3.1792867 | 1.6687031 | 3.1792867 up | chr6:108947347-108948671 (-) // 98.21 // q21    |
| 229926_at    | MIR3682           | 3.1792645 | 1.6686931 | 3.1792645 up | chr2:54075769-54076470 (-) // 88.45 // p16.2    |
| 244625_at    |                   | 3.1785038 | 1.6683478 | 3.1785038 up | chr1:8586369-8586807 (-) // 98.21 // p36.23     |
| 229773_at    | SNAP23            | 3.1745129 | 1.6665353 | 3.1745129 up | chr15:42813699-42814914 (+) // 94.75 // q15.2   |
| 227556_at    | NME7              | 3.1693468 | 1.6641855 | 3.1693468 up | chr1:169101279-169102436 (-) // 94.58 // q24.2  |
| 206120_at    | CD33              | 3.169115  | 1.66408   | 3.169115 up  | chr19:51728362-51743272 (+) // 86.78 // q13.41  |
| 1560763_at   |                   | 3.1677034 | 1.6634372 | 3.1677034 up | chr10:376940-378953 (-) // 55.75 // p15.3       |
| 1556267_at   | MYRFL             | 3.1674068 | 1.6633022 | 3.1674068 up | chr12:70320436-70352503 (+) // 98.08 // q15     |
| 222339_x_at  |                   | 3.1672761 | 1.6632427 | 3.1672761 up | chr19:13134436-13134625 (+) // 51.88 // p13.2   |
| 203887_s_at  | THBD              | 3.1663768 | 1.662833  | 3.1663768 up | chr20:23026634-23030683 (-) // 93.63 // p11.21  |
| 226922_at    | RANBP2            | 3.1643703 | 1.6619184 | 3.1643703 up | chr2:109401190-109402267 (+) // 97.55 // q12.3  |
| 233751_at    | ZFHX3             | 3.163384  | 1.6614686 | 3.163384 up  | chr16:72923266-73082274 (-) // 93.87 // q22.3   |
| 222330_at    |                   | 3.1624765 | 1.6610547 | 3.1624765 up | chr11:14807417-14807860 (+) // 30.51 // p15.2   |
| 232264_at    |                   | 3.162401  | 1.6610203 | 3.162401 up  | chr8:103391264-103393261 (-) // 49.86 // q22.3  |
| 234492_at    |                   | 3.1568618 | 1.6584911 | 3.1568618 up |                                                 |
| 240544_at    |                   | 3.1526613 | 1.6565702 | 3.1526613 up | chr6:37976040-37976636 (+) // 65.67 // p21.2    |
| 207776_s_at  | CACNB2            | 3.151534  | 1.6560543 | 3.151534 up  | chr10:18549697-18829302 (+) // 98.89 // p12.33  |
|              |                   |           |           |              | chr16:22449214-22450076 (+) // 98.74 //         |
|              |                   |           |           |              | p12.2///chr16:21511806-21512668 (-) // 98.74 // |
|              |                   |           |           |              | p12.2///chr16:29604917-29605782 (-) // 98.05 // |
|              |                   |           |           |              | p11.2///chr16:30345005-30345868 (-) // 97.36 // |
|              |                   |           |           |              | p11.2                                           |
| 237464_at    | LOC101060589///SM | 3.1487505 | 1.6547794 | 3.1487505 up | chr2:203690167-203736086 (-) // 91.48 // q33.2  |
| 1555671_at   | ICA1L             | 3.1475108 | 1.6542113 | 3.1475108 up | chr12:51318801-51326288 (+) // 89.79 // q13.12  |
| 207761_s_at  | METTL7A           | 3.145693  | 1.6533779 | 3.145693 up  | chr17:76783548-76836980 (-) // 93.44 // q25.3   |
| 224978_s_at  | USP36             | 3.1436775 | 1.6524532 | 3.1436775 up |                                                 |

|              |                        |           |           |              |                                                  |
|--------------|------------------------|-----------|-----------|--------------|--------------------------------------------------|
| 1570600_at   | <i>OTTHUMG00000175</i> | 3.1423898 | 1.6518621 | 3.1423898 up | chr9:140188319-140190173 (-) // 85.02 // q34.3   |
| 241502_x_at  |                        | 3.1422238 | 1.651786  | 3.1422238 up | chr3:139089501-139089792 (+) // 88.99 // q23     |
| 233832_at    |                        | 3.1409864 | 1.6512177 | 3.1409864 up | chr16:22054789-22056505 (+) // 33.18 // p12.2    |
| 207596_at    | <i>SLCO4C1</i>         | 3.1398118 | 1.650678  | 3.1398118 up | chr5:101569689-101571279 (+) // 93.78 // q21.1   |
| 213116_at    | <i>NEK3</i>            | 3.139231  | 1.6504111 | 3.139231 up  | chr13:52706782-52728284 (-) // 89.86 // q14.3    |
| 244321_at    | <i>PGAP1</i>           | 3.1385558 | 1.6501008 | 3.1385558 up | chr2:197706061-197712079 (-) // 88.7 // q33.1    |
| 1557763_at   | <i>LPAR6</i>           | 3.1363385 | 1.6490812 | 3.1363385 up | chr13:48963706-49013949 (-) // 59.38 // q14.2    |
| 233325_at    | <i>SLC35D2</i>         | 3.1354167 | 1.6486572 | 3.1354167 up | chr9:99075726-99083596 (-) // 19.87 // q22.32    |
| 243469_at    |                        | 3.1317115 | 1.6469513 | 3.1317115 up | chr4:140039838-140040301 (-) // 48.08 // q31.1   |
| 241016_at    |                        | 3.1315663 | 1.6468844 | 3.1315663 up | chr2:225356357-225357192 (+) // 37.56 // q36.2   |
| 225930_at    | <i>NKIRAS1</i>         | 3.1287    | 1.6455634 | 3.1287 up    | chr3:23933309-23958452 (-) // 94.16 // p24.2     |
| 244581_at    | <i>ZBTB20</i>          | 3.128438  | 1.6454425 | 3.128438 up  | chr3:114377187-114377703 (-) // 81.78 // q13.31  |
| 1556055_at   |                        | 3.128109  | 1.6452907 | 3.128109 up  |                                                  |
| 236327_at    |                        | 3.1278203 | 1.6451576 | 3.1278203 up | chr1:111710435-111711030 (+) // 50.81 // p13.3   |
| 240216_at    |                        | 3.1259875 | 1.644312  | 3.1259875 up | chr3:114128000-114128407 (-) // 78.04 // q13.31  |
| 225531_at    | <i>CABLES1</i>         | 3.1251063 | 1.6439053 | 3.1251063 up | chr18:20774409-20840431 (+) // 98.13 // q11.2    |
| 216022_at    |                        | 3.1245296 | 1.643639  | 3.1245296 up | chr12:982204-983320 (+) // 79.23 // p13.33       |
| 211538_s_at  | <i>HSPA2</i>           | 3.1233532 | 1.6430957 | 3.1233532 up | chr14:64590735-65009952 (+) // 50.54 // q23.2    |
| 236404_at    |                        | 3.1224213 | 1.6426651 | 3.1224213 up | chr6:16731714-16732243 (-) // 96.0 // p22.3      |
| 223890_at    | <i>PRO1082</i>         | 3.1179092 | 1.6405789 | 3.1179092 up | chr3:114391180-114393046 (-) // 84.7 // q13.31   |
| 236889_at    | <i>OTTHUMG00000168</i> | 3.1162796 | 1.6398246 | 3.1162796 up | chr12:123366752-123367220 (-) // 55.3 // q24.31  |
| 1556983_a_at |                        | 3.1138096 | 1.6386807 | 3.1138096 up | chr11:9764866-9765431 (+) // 19.13 // p15.4      |
| 242611_at    |                        | 3.112299  | 1.6379807 | 3.112299 up  | chr1:62948880-62949301 (-) // 48.55 // p31.3     |
| 244548_at    |                        | 3.1097188 | 1.6367841 | 3.1097188 up | chr5:142326128-142326685 (+) // 92.84 // q31.3   |
| 240089_at    |                        | 3.109311  | 1.636595  | 3.109311 up  | chr7:26213152-26213811 (-) // 31.41 // p15.2     |
| 218750_at    | <i>TAF1D</i>           | 3.108814  | 1.6363643 | 3.108814 up  | chr11:93463368-93474660 (-) // 97.65 // q21      |
| 227964_at    | <i>FRMD8</i>           | 3.1067097 | 1.6353874 | 3.1067097 up | chr11:65180565-65180993 (+) // 51.75 // q13.1    |
| 1556493_a_at | <i>KDM4C</i>           | 3.105364  | 1.6347624 | 3.105364 up  | chr9:6908973-6909614 (+) // 96.63 // p24.1       |
| 1559156_at   |                        | 3.103682  | 1.6339808 | 3.103682 up  | chr15:68390038-68392274 (+) // 27.39 // q23      |
| 212959_s_at  | <i>GNPTAB</i>          | 3.1033978 | 1.6338487 | 3.1033978 up | chr12:102139274-102158566 (-) // 79.93 // q23.2  |
| 235568_at    | <i>C19orf59</i>        | 3.1032765 | 1.6337923 | 3.1032765 up | chr19:7741975-7744713 (+) // 93.56 // p13.2      |
| 222168_at    |                        | 3.1011722 | 1.6328137 | 3.1011722 up | chr15:101449472-101453357 (+) // 37.23 // q26.3  |
| 206117_at    | <i>TPM1</i>            | 3.0989316 | 1.6317708 | 3.0989316 up | chr15:63334971-63358291 (+) // 99.28 // q22.2    |
| 236002_at    |                        | 3.0969756 | 1.63086   | 3.0969756 up | chr12:118649360-118650439 (-) // 69.66 // q24.23 |

|                |                         |           |           |              |                                                  |
|----------------|-------------------------|-----------|-----------|--------------|--------------------------------------------------|
| 1560332_at     |                         | 3.096815  | 1.6307852 | 3.096815 up  | chr12:104979152-104983103 (+) // 54.35 // q23.3  |
| 40687_at       | <i>GJA4</i>             | 3.0965672 | 1.6306697 | 3.0965672 up | chr1:35258615-35261525 (+) // 91.55 // p34.3     |
| 239349_at      | <i>C1QTNF7</i>          | 3.0964317 | 1.6306067 | 3.0964317 up | chr4:15446817-15447790 (+) // 98.68 // p15.32    |
| 243878_at      |                         | 3.0936933 | 1.6293302 | 3.0936933 up | chr3:71240674-71241071 (-) // 98.76 // p13       |
| 208396_s_at    | <i>PDE1A</i>            | 3.093661  | 1.6293151 | 3.093661 up  | chr2:183032666-183387465 (-) // 97.26 // q32.1   |
| 222620_s_at    | <i>DNAJC1</i>           | 3.0919757 | 1.628529  | 3.0919757 up | chr10:22045476-22292633 (-) // 92.63 // p12.31   |
| 232528_at      |                         | 3.091191  | 1.6281629 | 3.091191 up  | chr2:181919579-181920809 (+) // 25.69 // q31.3   |
| 206412_at      | <i>FER</i>              | 3.0909872 | 1.6280677 | 3.0909872 up | chr5:108083522-108523373 (+) // 95.02 // q21.3   |
| 212828_at      | <i>SYNJ2</i>            | 3.0903544 | 1.6277723 | 3.0903544 up | chr6:158480004-158520205 (+) // 99.19 // q25.3   |
| 222025_s_at    | <i>OPLAH</i>            | 3.0886075 | 1.6269566 | 3.0886075 up | chr8:145106167-145109992 (-) // 71.27 // q24.3   |
| 1552648_a_at   | <i>TNFRSF10A</i>        | 3.087299  | 1.6263453 | 3.087299 up  | chr8:22968801-23082639 (-) // 84.21 // p21.3     |
| 242405_at      |                         | 3.0862124 | 1.6258373 | 3.0862124 up | chr11:95954852-95955313 (-) // 91.65 // q21      |
| 240475_at      | <i>EGOT</i>             | 3.082603  | 1.6241491 | 3.082603 up  | chr3:4790879-4792920 (-) // 100.0 // p26.1       |
| 215285_s_at    | <i>PHTF1</i>            | 3.0818217 | 1.6237833 | 3.0818217 up | chr1:114248386-114255950 (-) // 97.43 // p13.2   |
| 238869_at      |                         | 3.0784643 | 1.6222109 | 3.0784643 up | chr14:62179099-62180011 (+) // 29.93 // q23.2    |
| 232372_at      |                         | 3.0783622 | 1.622163  | 3.0783622 up | chr6:158745372-158750497 (+) // 40.0 // q25.3    |
|                |                         |           |           |              | chr16:22523350-22525827 (+) // 52.46 //          |
|                |                         |           |           |              | p12.2///chr16:28647889-28764498 (+) // 49.54 //  |
|                |                         |           |           |              | p11.2///chr16:14801030-14803505 (+) // 49.3 //   |
|                |                         |           |           |              | p13.11///chr16:14840152-14842627 (+) // 49.3 //  |
|                |                         |           |           |              | p13.11///chr16:21435714-21438191 (-) // 49.62 // |
|                |                         |           |           |              | p12.2///chr16:21867994-21870471 (-) // 52.42 //  |
|                |                         |           |           |              | p12.2///chr16:30256189-30258661 (-) // 52.74 //  |
|                |                         |           |           |              | p11.2///chr16:29516208-29518678 (-) // 52.66 //  |
|                |                         |           |           |              | p11.2///chr16:29414418-29416894 (-) // 51.86 //  |
|                |                         |           |           |              | p11.2///chr16:70029386-70031862 (-) // 52.18 //  |
|                |                         |           |           |              | q22.1///chr16:15474199-15476676 (-) // 52.14 //  |
|                |                         |           |           |              | p13.11///chr18:11638759-11641230 (-) // 50.02 // |
|                |                         |           |           |              | p11.21                                           |
| 215123_at      | <i>LOC613037///NPIP</i> | 3.077127  | 1.6215839 | 3.077127 up  | chr1:8657856-8658149 (-) // 100.0 // p36.23      |
| 244265_at      |                         | 3.076983  | 1.6215165 | 3.076983 up  |                                                  |
| 216528_at      |                         | 3.076699  | 1.6213833 | 3.076699 up  |                                                  |
| 231310_at      |                         | 3.0762076 | 1.6211529 | 3.0762076 up | chr3:32938602-32939315 (+) // 94.53 // p22.3     |
| 231147_at      |                         | 3.0755    | 1.620821  | 3.0755 up    |                                                  |
| AFFX-BioB-3_at |                         | 3.0732505 | 1.6197654 | 3.0732505 up |                                                  |

|              |                    |           |           |              |                                                                                                                                                                                                          |
|--------------|--------------------|-----------|-----------|--------------|----------------------------------------------------------------------------------------------------------------------------------------------------------------------------------------------------------|
| 230332_at    | ZCCHC7             | 3.071238  | 1.6188203 | 3.071238 up  | chr9:37183493-37184389 (+) // 70.08 // p13.2<br>chr1:120910664-120912800 (+) // 10.63 //<br>p11.2///chr1:149392422-149394565 (-) // 15.2 //<br>q21.2///chr1:149777429-149779567 (-) // 11.23 //<br>q21.2 |
| 1555967_at   |                    | 3.069577  | 1.6180398 | 3.069577 up  | chr14:93154386-93154917 (-) // 99.62 // q32.12                                                                                                                                                           |
| 222069_s_at  |                    | 3.0664313 | 1.6165606 | 3.0664313 up | chr16:81508262-81508970 (+) // 75.32 // q23.2                                                                                                                                                            |
| 224082_at    |                    | 3.0622575 | 1.6145957 | 3.0622575 up | chr4:39127137-39127851 (+) // 52.89 // p14                                                                                                                                                               |
| 227565_at    | KLHL5              | 3.0598588 | 1.6134651 | 3.0598588 up | chr11:65154107-65154728 (+) // 86.03 // q13.1                                                                                                                                                            |
| 1554903_at   | FRMD8              | 3.0591373 | 1.6131248 | 3.0591373 up | chr17:58298008-58356691 (+) // 45.61 // q23.1                                                                                                                                                            |
| 224086_at    |                    | 3.0589402 | 1.6130319 | 3.0589402 up | chr13:41161305-41161422 (+) // 66.86 // q14.11                                                                                                                                                           |
| 241665_x_at  |                    | 3.0576112 | 1.612405  | 3.0576112 up | chr2:157362640-157363101 (+) // 99.14 // q24.1                                                                                                                                                           |
| 243598_at    |                    | 3.0571814 | 1.6122022 | 3.0571814 up | chr18:44247783-44248550 (-) // 96.83 // q21.1                                                                                                                                                            |
| 236110_at    | CTD-2001I24.1///OT | 3.0547328 | 1.6110462 | 3.0547328 up | chr2:207998899-207999351 (-) // 96.38 // q33.3                                                                                                                                                           |
| 239809_at    |                    | 3.0544705 | 1.6109223 | 3.0544705 up | chr2:37234506-37236226 (-) // 76.61 // p22.2                                                                                                                                                             |
| 1569503_at   | HEATR5B            | 3.0513363 | 1.6094412 | 3.0513363 up | chr5:108530975-108532539 (+) // 98.86 // q21.3                                                                                                                                                           |
| 227579_at    | FER                | 3.0509465 | 1.6092569 | 3.0509465 up | chr2:29175354-29176145 (+) // 71.5 // p23.2                                                                                                                                                              |
| 238186_at    |                    | 3.0508578 | 1.6092149 | 3.0508578 up | chr12:47092541-47093250 (+) // 88.74 // q13.11                                                                                                                                                           |
| 236963_at    |                    | 3.0502098 | 1.6089084 | 3.0502098 up | chrX:102094835-102121751 (+) // 72.36 // q22.1                                                                                                                                                           |
| 1569674_at   | LINC00630          | 3.0483732 | 1.6080395 | 3.0483732 up | chr5:118514230-118515001 (+) // 99.74 // q23.1                                                                                                                                                           |
| 241472_at    |                    | 3.0472932 | 1.6075283 | 3.0472932 up | chr3:153905473-153974337 (+) // 89.03 // q25.2                                                                                                                                                           |
| 233903_s_at  | ARHGEF26           | 3.0447195 | 1.6063093 | 3.0447195 up | chr1:149834151-149834700 (+) // 69.05 //<br>q21.2///chr1:149802245-149802794 (-) // 69.05 //<br>q21.2                                                                                                    |
| 231027_at    |                    | 3.0424228 | 1.6052207 | 3.0424228 up | chr12:14658062-14658560 (-) // 65.63 // p13.1                                                                                                                                                            |
| 236422_at    |                    | 3.041825  | 1.6049372 | 3.041825 up  | chr7:81331849-81399359 (-) // 100.0 // q21.11                                                                                                                                                            |
| 209961_s_at  | HGF                | 3.0380669 | 1.6031536 | 3.0380669 up | chr10:72163581-72165086 (-) // 91.66 // q22.1                                                                                                                                                            |
| 1570454_at   | EIF4EBP2           | 3.0352507 | 1.6018157 | 3.0352507 up | chr2:196524214-196525637 (+) // 87.14 // q32.3                                                                                                                                                           |
| 226444_at    |                    | 3.0350235 | 1.6017077 | 3.0350235 up | chr13:113399763-113409007 (-) // 46.48 // q34                                                                                                                                                            |
| 1561699_a_at | ATP11A-AS1///ATP11 | 3.033245  | 1.600862  | 3.033245 up  | chr1:19477417-19510359 (-) // 99.45 // p36.13                                                                                                                                                            |
| 231889_at    | UBR4               | 3.0330517 | 1.6007701 | 3.0330517 up | chr12:989373-1011299 (+) // 97.93 // p13.33                                                                                                                                                              |
| 202940_at    | WNK1               | 3.0324311 | 1.6004748 | 3.0324311 up | chr13:95768175-95953670 (-) // 89.24 // q32.1                                                                                                                                                            |
| 1554918_a_at | ABCC4              | 3.0323343 | 1.6004288 | 3.0323343 up | chr18:60974088-60976901 (-) // 83.39 // q21.33                                                                                                                                                           |
| 232210_at    |                    | 3.031687  | 1.6001208 | 3.031687 up  | chr2:118771788-118773249 (+) // 74.83 // q14.1                                                                                                                                                           |
| 217606_at    | AC009303.2///OTTH  | 3.031261  | 1.599918  | 3.031261 up  |                                                                                                                                                                                                          |

|              |                          |           |           |              |                                                 |
|--------------|--------------------------|-----------|-----------|--------------|-------------------------------------------------|
| 243573_at    |                          | 3.030866  | 1.59973   | 3.030866 up  | chr3:187987103-188072804 (+) // 65.28 // q28    |
| 239784_at    |                          | 3.0295863 | 1.5991209 | 3.0295863 up | chr1:246264402-246264824 (-) // 95.02 // q44    |
| 1556006_s_at | <i>CTB-89H12.4//OTTH</i> | 3.0269375 | 1.5978589 | 3.0269375 up | chr5:148877415-148882030 (-) // 84.04 // q32    |
| 236612_at    |                          | 3.0261583 | 1.5974874 | 3.0261583 up | chr14:64178915-64179434 (-) // 41.15 // q23.2   |
| 239285_at    |                          | 3.0237117 | 1.5963206 | 3.0237117 up | chr9:7049730-7050442 (+) // 97.78 // p24.1      |
| 240432_x_at  | <i>KLF7</i>              | 3.0229616 | 1.5959626 | 3.0229616 up | chr2:207939809-207940236 (-) // 91.16 // q33.3  |
| 232247_at    | <i>ZNF502</i>            | 3.020493  | 1.594784  | 3.020493 up  | chr3:44762720-44764614 (+) // 97.69 // p21.31   |
| 219228_at    | <i>ZNF331</i>            | 3.0173748 | 1.5932939 | 3.0173748 up | chr19:54042041-54081332 (+) // 93.22 // q13.42  |
| 237396_at    |                          | 3.017154  | 1.5931883 | 3.017154 up  | chr11:33372377-33372900 (+) // 82.84 // p13     |
| 233303_at    |                          | 3.0168707 | 1.5930529 | 3.0168707 up | chr4:103727417-103728960 (-) // 99.1 // q24     |
| 239448_at    |                          | 3.0163016 | 1.5927807 | 3.0163016 up | chr15:67399058-67399491 (+) // 77.53 // q22.33  |
| 216947_at    | <i>DES</i>               | 3.0163004 | 1.5927801 | 3.0163004 up | chr2:220284857-220291454 (-) // 63.14 // q35    |
| 222621_at    | <i>DNAJC1</i>            | 3.0156999 | 1.5924928 | 3.0156999 up | chr10:22045476-22292633 (-) // 92.63 // p12.31  |
| 234968_at    | <i>DENND4C</i>           | 3.0121367 | 1.5907873 | 3.0121367 up | chr9:19346725-19357691 (+) // 90.72 // p22.1    |
| 243335_at    | <i>P4HA1</i>             | 3.0104094 | 1.5899596 | 3.0104094 up | chr10:74561111-74561243 (-) // 46.98 // q22.1   |
| 232425_at    | <i>SNX25</i>             | 3.0099127 | 1.5897217 | 3.0099127 up | chr4:186244679-186291338 (+) // 89.63 // q35.1  |
| 207794_at    | <i>CCR2</i>              | 3.0082955 | 1.5889463 | 3.0082955 up | chr3:46395639-46400909 (+) // 99.55 // p21.31   |
| 229422_at    | <i>NRD1</i>              | 3.0053556 | 1.5875357 | 3.0053556 up | chr1:52302636-52303622 (-) // 87.11 // p32.3    |
| 234967_at    | <i>IL6ST</i>             | 3.0045016 | 1.5871257 | 3.0045016 up | chr5:55244705-55247334 (-) // 88.89 // q11.2    |
| 1569522_at   |                          | 3.004382  | 1.5870682 | 3.004382 up  | chr16:29606389-29607445 (+) // 80.11 // p11.2   |
| 239418_x_at  |                          | 3.003199  | 1.5865002 | 3.003199 up  | chr10:97659482-97659910 (-) // 66.29 // q24.1   |
| 242220_at    | <i>SPTBN1</i>            | 3.0031767 | 1.5864893 | 3.0031767 up | chr2:54898121-54898582 (+) // 88.56 // p16.2    |
| 238257_at    |                          | 3.0001128 | 1.5850167 | 3.0001128 up | chr10:22015634-22016029 (-) // 97.52 // p12.31  |
| 223860_at    | <i>PRO1167</i>           | 2.999772  | 1.5848529 | 2.999772 up  | chr11:85754649-85756587 (-) // 49.59 // q14.2   |
| 214153_at    | <i>ELOVL5</i>            | 2.9956925 | 1.5828896 | 2.9956925 up | chr6:53134259-53135626 (-) // 88.94 // p12.1    |
| 232189_at    | <i>OTTHUMG0000018C</i>   | 2.9947708 | 1.5824456 | 2.9947708 up | chr18:56418725-56421708 (+) // 63.14 // q21.32  |
| 208187_s_at  |                          | 2.993039  | 1.581611  | 2.993039 up  | chr5:137881628-137882992 (-) // 38.92 // q31.2  |
| 217103_at    | <i>LDLR</i>              | 2.9929218 | 1.5815547 | 2.9929218 up | chr19:11234004-11234270 (+) // 60.64 // p13.2   |
| 239826_at    |                          | 2.9928298 | 1.5815102 | 2.9928298 up | chr18:20784178-20784626 (+) // 75.11 // q11.2   |
| 213158_at    | <i>OTTHUMG0000017C</i>   | 2.9927616 | 1.5814774 | 2.9927616 up | chr3:114033352-114035396 (-) // 77.85 // q13.31 |
| 209168_at    | <i>GPM6B</i>             | 2.992321  | 1.581265  | 2.992321 up  | chrX:13789041-13835178 (-) // 96.02 // p22.2    |
| 244549_at    | <i>AC007401.2//OTTH</i>  | 2.9917555 | 1.5809922 | 2.9917555 up | chr2:36758560-36759298 (-) // 77.25 // p22.2    |
| 216440_at    |                          | 2.9905941 | 1.5804322 | 2.9905941 up | chr12:1420765-1422780 (-) // 67.24 // p13.33    |
| 1570338_at   |                          | 2.9871917 | 1.5787898 | 2.9871917 up | chr2:242696703-242697330 (+) // 56.33 // q37.3  |

|                      |                          |           |           |              |                                                  |
|----------------------|--------------------------|-----------|-----------|--------------|--------------------------------------------------|
| 207426_s_at          | <i>TNFSF4</i>            | 2.9860187 | 1.5782232 | 2.9860187 up | chr1:173152873-173176351 (-) // 82.87 // q25.1   |
| 1554014_at           | <i>CHD2///LOC1005072</i> | 2.9841533 | 1.5773216 | 2.9841533 up | chr15:93443564-93492460 (+) // 97.36 // q26.1    |
| 233674_at            |                          | 2.9832046 | 1.5768629 | 2.9832046 up | chr6:108947347-108948667 (+) // 97.92 // q21     |
| 238382_x_at          |                          | 2.9829001 | 1.5767157 | 2.9829001 up | chr11:33060086-33060553 (-) // 7.65 // p13       |
| 203320_at            | <i>SH2B3</i>             | 2.9807954 | 1.5756973 | 2.9807954 up | chr12:111843751-111889426 (+) // 91.76 // q24.12 |
| AFFX-r2-Ec-bioB-M_at |                          | 2.979653  | 1.5751443 | 2.979653 up  |                                                  |
| 201712_s_at          | <i>RANBP2</i>            | 2.9789772 | 1.5748171 | 2.9789772 up | chr2:109335936-109401246 (+) // 99.95 // q12.3   |
| 216287_at            |                          | 2.9783883 | 1.5745319 | 2.9783883 up | chr3:193389059-193390657 (-) // 47.51 // q29     |
| 215674_at            |                          | 2.9763777 | 1.5735576 | 2.9763777 up | chr22:40876291-40883142 (+) // 53.92 // q13.1    |
| 242558_at            |                          | 2.9759686 | 1.5733593 | 2.9759686 up | chr3:41255048-41255898 (+) // 78.7 // p22.1      |
| 215078_at            | <i>LOC100129518///SO</i> | 2.9758098 | 1.5732824 | 2.9758098 up | chr6:160112030-160114276 (-) // 93.22 // q25.3   |
| 1559664_at           |                          | 2.974104  | 1.572455  | 2.974104 up  | chr3:122597523-122600323 (-) // 71.99 // q21.1   |
| 216588_at            | <i>OTTHUMG00000014</i>   | 2.9737718 | 1.572294  | 2.9737718 up | chr6:34584314-34585035 (+) // 100.0 // p21.31    |
| 202351_at            | <i>ITGAV</i>             | 2.9732776 | 1.5720541 | 2.9732776 up | chr2:187454789-187545625 (+) // 97.58 // q32.1   |
| 243282_at            | <i>CCDC93</i>            | 2.9731827 | 1.5720081 | 2.9731827 up | chr2:118693611-118694060 (-) // 91.27 // q14.1   |
| AFFX-BioB-M_at       |                          | 2.972615  | 1.5717326 | 2.972615 up  |                                                  |
| 210958_s_at          | <i>MAST4</i>             | 2.9712949 | 1.5710918 | 2.9712949 up | chr5:66461435-66463092 (+) // 96.62 // q12.3     |
| 214929_s_at          | <i>KIAA1109</i>          | 2.9709208 | 1.5709101 | 2.9709208 up | chr4:123176013-123246921 (+) // 99.32 // q27     |
| 234136_at            |                          | 2.9698062 | 1.5703688 | 2.9698062 up | chr2:64180364-64182659 (+) // 22.32 // p14       |
| 225612_s_at          | <i>B3GNT5</i>            | 2.9687595 | 1.5698602 | 2.9687595 up | chr3:182988592-182991172 (+) // 98.81 // q27.1   |
| 241681_at            |                          | 2.9677246 | 1.5693572 | 2.9677246 up | chr3:152064232-152064670 (+) // 94.73 // q25.1   |
| 233648_at            |                          | 2.965394  | 1.5682238 | 2.965394 up  | chr11:111515062-111518286 (+) // 24.55 // q23.1  |
| 232565_at            |                          | 2.9619086 | 1.5665271 | 2.9619086 up | chr12:1402915-1405192 (+) // 89.4 // p13.33      |
| 218695_at            | <i>EXOSC4</i>            | 2.9608753 | 1.5660237 | 2.9608753 up | chr8:145133528-145135550 (+) // 98.77 // q24.3   |
| 220866_at            | <i>ADAMTS6</i>           | 2.9598238 | 1.5655113 | 2.9598238 up | chr5:64510224-64769521 (-) // 99.89 // q12.3     |
| 1563077_at           | <i>LOC100289058</i>      | 2.959001  | 1.5651102 | 2.959001 up  | chr13:41110397-41111324 (-) // 61.58 // q14.11   |
| 243233_at            |                          | 2.958082  | 1.564662  | 2.958082 up  | chr13:28806210-28806625 (+) // 78.71 // q12.2    |
| 239238_at            |                          | 2.9573994 | 1.564329  | 2.9573994 up | chr3:47729808-47730465 (-) // 65.36 // p21.31    |
| 235157_at            |                          | 2.9573896 | 1.5643243 | 2.9573896 up | chr3:122444126-122445844 (+) // 32.59 // q21.1   |
| 239295_at            | <i>SRSF12</i>            | 2.9559138 | 1.5636042 | 2.9559138 up | chr6:89805678-89806244 (-) // 60.72 // q15       |
| 243279_at            |                          | 2.954839  | 1.5630795 | 2.954839 up  | chr6:53224624-53225129 (+) // 89.59 // p12.1     |
| 230825_at            |                          | 2.952992  | 1.5621774 | 2.952992 up  | chr6:89799044-89799727 (-) // 74.71 // q15       |
| 217649_at            | <i>ZFAND5</i>            | 2.9526472 | 1.562009  | 2.9526472 up | chr9:74971749-74972392 (-) // 92.54 // q21.13    |

|                      |                          |           |           |              |                                                 |
|----------------------|--------------------------|-----------|-----------|--------------|-------------------------------------------------|
| 1560453_at           |                          | 2.9523923 | 1.5618844 | 2.9523923 up | chr1:63054800-63056711 (-) // 14.24 // p31.3    |
| 238243_at            |                          | 2.9519727 | 1.5616794 | 2.9519727 up | chr5:86688421-86688891 (+) // 97.51 // q14.3    |
| 238231_at            | <i>NFYC</i>              | 2.951901  | 1.5616443 | 2.951901 up  | chr1:41201512-41201964 (+) // 100.0 // p34.2    |
| 1555898_at           | <i>ANKRD36C</i>          | 2.951806  | 1.561598  | 2.951806 up  | chr2:96472809-96473861 (-) // 77.21 // q11.1    |
| 235844_at            | <i>PHTF1</i>             | 2.9509764 | 1.5611924 | 2.9509764 up | chr1:114242889-114243842 (-) // 64.94 // p13.2  |
| AFFX-r2-Ec-bioB-3_at |                          | 2.9505405 | 1.5609792 | 2.9505405 up |                                                 |
| 211347_at            | <i>CDC14B</i>            | 2.950462  | 1.560941  | 2.950462 up  | chr9:99252522-99382112 (-) // 89.03 // q22.32   |
| 1561692_at           | <i>OTTHUMG00000176</i>   | 2.9500859 | 1.5607569 | 2.9500859 up |                                                 |
| 238736_at            | <i>REV3L</i>             | 2.949923  | 1.5606773 | 2.949923 up  | chr6:111802058-111802944 (-) // 97.56 // q21    |
| 232587_at            | <i>EML4</i>              | 2.9491758 | 1.5603118 | 2.9491758 up | chr2:42510048-42517056 (+) // 70.54 // p21      |
| 242853_at            |                          | 2.948168  | 1.5598187 | 2.948168 up  | chr3:194197509-194197940 (-) // 54.32 // q29    |
| 242110_at            |                          | 2.94807   | 1.5597708 | 2.94807 up   | chr14:32569655-32570858 (+) // 73.37 // q12     |
| 243991_at            |                          | 2.9449873 | 1.5582614 | 2.9449873 up | chr3:135806320-135806725 (-) // 43.06 // q22.3  |
| 1565811_at           |                          | 2.9438093 | 1.5576842 | 2.9438093 up | chr2:68423971-68425194 (+) // 16.84 // p14      |
| 209167_at            | <i>GPM6B</i>             | 2.9423842 | 1.5569856 | 2.9423842 up | chrX:13789041-13835178 (-) // 96.02 // p22.2    |
| 216236_s_at          | <i>SLC2A14///SLC2A3</i>  | 2.940126  | 1.5558779 | 2.940126 up  | chr12:7966124-8025847 (-) // 96.89 // p13.31    |
| 223217_s_at          | <i>NFKBIZ</i>            | 2.9395916 | 1.5556158 | 2.9395916 up | chr3:101568424-101579866 (+) // 90.1 // q12.3   |
| 244019_at            |                          | 2.9390984 | 1.5553737 | 2.9390984 up | chr3:15021272-15021825 (+) // 50.36 // p25.1    |
| 242431_at            |                          | 2.9372044 | 1.5544436 | 2.9372044 up | chr15:72854792-72855237 (+) // 97.8 // q24.1    |
| 240073_at            |                          | 2.937046  | 1.5543659 | 2.937046 up  | chr3:135895584-135896149 (+) // 65.26 // q22.3  |
| 232540_x_at          |                          | 2.9362957 | 1.5539973 | 2.9362957 up | chr16:22433092-22434386 (-) // 23.55 // p12.2   |
| 210365_at            | <i>LOC100506403///RU</i> | 2.9360442 | 1.5538737 | 2.9360442 up | chr21:36193573-36260987 (-) // 92.58 // q22.12  |
| 1558409_at           |                          | 2.9348028 | 1.5532635 | 2.9348028 up | chr7:110992424-110994635 (-) // 53.22 // q31.1  |
| 232929_at            |                          | 2.9325888 | 1.5521748 | 2.9325888 up | chr3:114483113-114484961 (-) // 58.27 // q13.31 |
| 1569003_at           | <i>VMP1</i>              | 2.9309    | 1.5513438 | 2.9309 up    | chr17:57915319-57916647 (-) // 74.91 // q23.1   |
| 223492_s_at          | <i>LRRFIP1</i>           | 2.930333  | 1.5510646 | 2.930333 up  | chr2:238677701-238688957 (+) // 90.62 // q37.3  |
| AFFX-r2-Ec-bioB-5_at |                          | 2.9269412 | 1.5493938 | 2.9269412 up |                                                 |
| 219257_s_at          | <i>SPHK1</i>             | 2.9245982 | 1.5482384 | 2.9245982 up | chr17:74380745-74383941 (+) // 98.49 // q25.1   |
| 203680_at            | <i>PRKAR2B</i>           | 2.9240382 | 1.5479622 | 2.9240382 up | chr7:106685177-106801864 (+) // 98.59 // q22.3  |
| 242827_x_at          |                          | 2.923999  | 1.5479429 | 2.923999 up  | chr5:118648067-118648440 (+) // 55.99 // q23.1  |
| 215271_at            | <i>TNN</i>               | 2.9219255 | 1.5469195 | 2.9219255 up | chr1:175046569-175117202 (+) // 99.86 // q25.1  |
| 219383_at            | <i>PRR5L</i>             | 2.9184396 | 1.5451972 | 2.9184396 up | chr11:36397587-36486515 (+) // 99.71 // p13     |
| 1559735_at           |                          | 2.9177063 | 1.5448346 | 2.9177063 up | chr3:3837437-3840132 (-) // 83.25 // p26.2      |
| 227000_at            | <i>C7orf41</i>           | 2.9175434 | 1.5447541 | 2.9175434 up | chr7:30198570-30200892 (+) // 91.07 // p14.3    |

|              |                    |           |           |           |    |                                                                                                                                                                                                                                                                                                                                                         |
|--------------|--------------------|-----------|-----------|-----------|----|---------------------------------------------------------------------------------------------------------------------------------------------------------------------------------------------------------------------------------------------------------------------------------------------------------------------------------------------------------|
| 202032_s_at  | MAN2A2             | 2.9175344 | 1.5447496 | 2.9175344 | up | chr15:91446155-91464417 (+) // 93.27 // q26.1                                                                                                                                                                                                                                                                                                           |
| 1554443_s_at | BEST1              | 2.917156  | 1.5445626 | 2.917156  | up | chr11:61717841-61731518 (+) // 91.33 // q12.3                                                                                                                                                                                                                                                                                                           |
| 236808_at    | FGFR1OP2           | 2.9160678 | 1.5440242 | 2.9160678 | up | chr12:27115499-27115977 (+) // 58.47 // p11.23<br>chr16:22514329-22514913 (+) // 67.24 //<br>p12.2///chr16:21878904-21879490 (-) // 67.4 //<br>p12.2///chr16:21446632-21447216 (-) // 81.73 //<br>p12.2///chr16:29527098-29527684 (-) // 67.09 //<br>p11.2///chr16:30267084-30267668 (-) // 66.93 //<br>p11.2///chr16:29425315-29425897 (-) // 66.46 // |
| 238341_at    |                    | 2.9156523 | 1.5438187 | 2.9156523 | up | p11.2                                                                                                                                                                                                                                                                                                                                                   |
| 232673_at    | LRRFIP2            | 2.9151826 | 1.5435863 | 2.9151826 | up | chr3:37143989-37145856 (+) // 50.67 // p22.2<br>chr2:87819437-87821034 (+) // 86.63 //<br>p11.2///chr2:112186888-112188485 (-) // 86.33 //                                                                                                                                                                                                              |
| 1552258_at   | LINC00152          | 2.9140975 | 1.5430492 | 2.9140975 | up | q13                                                                                                                                                                                                                                                                                                                                                     |
| 217674_at    |                    | 2.913641  | 1.5428231 | 2.913641  | up | chr9:140143479-140144299 (+) // 40.73 // q34.3                                                                                                                                                                                                                                                                                                          |
| 230415_at    |                    | 2.9130437 | 1.5425273 | 2.9130437 | up | chr3:71200828-71202683 (-) // 51.36 // p13<br>chr5:177306693-177307431 (+) // 60.65 //<br>q35.3///chr5:175390372-175391109 (-) // 60.65 //                                                                                                                                                                                                              |
| 236149_at    |                    | 2.9112532 | 1.5416403 | 2.9112532 | up | q35.2                                                                                                                                                                                                                                                                                                                                                   |
| 242440_at    |                    | 2.9096503 | 1.5408458 | 2.9096503 | up | chr11:47534026-47535062 (-) // 75.5 // p11.2                                                                                                                                                                                                                                                                                                            |
| 230333_at    |                    | 2.9094193 | 1.5407312 | 2.9094193 | up | chrX:23802705-23803157 (-) // 98.26 // p22.11                                                                                                                                                                                                                                                                                                           |
| 1552381_at   | SRSF12             | 2.909023  | 1.5405347 | 2.909023  | up | chr6:89807869-89827769 (-) // 98.7 // q15                                                                                                                                                                                                                                                                                                               |
| 242075_at    |                    | 2.908329  | 1.5401905 | 2.908329  | up | chr10:104879090-104879765 (-) // 38.9 // q24.32                                                                                                                                                                                                                                                                                                         |
| 209473_at    | ENTPD1             | 2.907198  | 1.5396293 | 2.907198  | up | chr10:97582992-97628298 (+) // 86.02 // q24.1                                                                                                                                                                                                                                                                                                           |
| 1560980_a_at | CTD-2169H9.1///OT1 | 2.9067793 | 1.5394216 | 2.9067793 | up | chr5:122844430-122844880 (-) // 96.98 // q23.2                                                                                                                                                                                                                                                                                                          |
| 226430_at    | RELL1              | 2.9054406 | 1.538757  | 2.9054406 | up | chr4:37612255-37615247 (-) // 77.93 // p14                                                                                                                                                                                                                                                                                                              |
| 234176_at    |                    | 2.9042168 | 1.5381491 | 2.9042168 | up | chr3:28323176-28325054 (-) // 66.92 // p24.1                                                                                                                                                                                                                                                                                                            |
| 235975_at    | MTO1               | 2.9019747 | 1.537035  | 2.9019747 | up | chr6:74218300-74218958 (+) // 95.41 // q13                                                                                                                                                                                                                                                                                                              |
| 1560271_at   |                    | 2.9010892 | 1.5365946 | 2.9010892 | up | chr1:97260519-97261846 (+) // 72.65 // p21.3                                                                                                                                                                                                                                                                                                            |
| 225107_at    | HNRNPA2B1          | 2.900455  | 1.5362792 | 2.900455  | up | chr7:26229269-26231735 (-) // 98.18 // p15.2                                                                                                                                                                                                                                                                                                            |
| 237456_at    |                    | 2.8999736 | 1.5360398 | 2.8999736 | up | chr3:72453952-72454435 (-) // 99.79 // p13                                                                                                                                                                                                                                                                                                              |
| 214866_at    | PLAUR              | 2.8989153 | 1.5355132 | 2.8989153 | up | chr19:44150427-44174318 (-) // 75.93 // q13.31                                                                                                                                                                                                                                                                                                          |
| 1562673_at   |                    | 2.8970585 | 1.5345888 | 2.8970585 | up | chr14:89809981-89811959 (-) // 65.29 // q32.11                                                                                                                                                                                                                                                                                                          |
| 243342_at    |                    | 2.8958962 | 1.5340099 | 2.8958962 | up | chr12:26678720-26678965 (-) // 100.0 // p11.23                                                                                                                                                                                                                                                                                                          |



|              |                          |           |           |              |                                                  |
|--------------|--------------------------|-----------|-----------|--------------|--------------------------------------------------|
| 236114_at    |                          | 2.895506  | 1.5338154 | 2.895506 up  | chr21:36218495-36218974 (-) // 55.63 // q22.12   |
| 243088_at    |                          | 2.8934839 | 1.5328076 | 2.8934839 up | chr2:32138600-32138999 (-) // 33.33 // p22.3     |
| 1562280_at   |                          | 2.892817  | 1.5324751 | 2.892817 up  | chr1:167272902-167276706 (+) // 71.75 // q24.2   |
| 1559911_at   |                          | 2.8927796 | 1.5324564 | 2.8927796 up | chr1:202530388-202531185 (+) // 47.38 // q32.1   |
| 212577_at    | <i>SMCHD1</i>            | 2.890489  | 1.5313137 | 2.890489 up  | chr18:2739473-2805012 (+) // 91.02 // p11.32     |
| 1560199_x_at |                          | 2.890434  | 1.5312861 | 2.890434 up  | chr5:60670941-60675012 (+) // 34.9 // q12.1      |
|              |                          |           |           |              | chr12:7941994-7948655 (+) // 84.34 //            |
|              |                          |           |           |              | p13.31///chr15:35375426-35377509 (-) // 83.35 // |
|              |                          |           |           |              | q14                                              |
| 220184_at    | <i>NANOG</i>             | 2.8901815 | 1.5311601 | 2.8901815 up | chr7:3080567-3083579 (-) // 60.88 // p22.2       |
| 1562368_at   | <i>CARD11</i>            | 2.8901129 | 1.5311258 | 2.8901129 up | chr17:15942536-15942780 (-) // 80.95 // p12      |
| 234313_at    | <i>NCOR1</i>             | 2.8900568 | 1.5310979 | 2.8900568 up | chr2:64809848-64810450 (+) // 93.73 // p14       |
| 239175_at    |                          | 2.8881848 | 1.530163  | 2.8881848 up | chr19:11531272-11532381 (-) // 96.67 // p13.2    |
| 230807_at    | <i>CCDC151</i>           | 2.8879473 | 1.5300444 | 2.8879473 up | chr1:35471632-35473193 (+) // 47.41 // p34.3     |
| 1561892_at   | <i>ZMYM6</i>             | 2.8866827 | 1.5294125 | 2.8866827 up | chr3:4339269-4339884 (-) // 77.74 // p26.1       |
| 244636_at    |                          | 2.88641   | 1.5292763 | 2.88641 up   | chr4:82372047-82393044 (-) // 63.1 // q21.21     |
| 1554999_at   | <i>RASGEF1B</i>          | 2.885559  | 1.5288509 | 2.885559 up  | chr8:12435814-12438798 (+) // 39.84 // p23.1     |
| 1560001_at   | <i>LOC100131581</i>      | 2.8850276 | 1.5285852 | 2.8850276 up | chr1:192778170-192781403 (+) // 97.55 // q31.2   |
| 202388_at    | <i>RGS2</i>              | 2.8847709 | 1.5284567 | 2.8847709 up |                                                  |
| 243842_at    |                          | 2.8843806 | 1.5282615 | 2.8843806 up |                                                  |
|              |                          |           |           |              | chr16:22516691-22517439 (+) // 59.79 //          |
|              |                          |           |           |              | p12.2///chr16:21444106-21444854 (-) // 60.18 //  |
|              |                          |           |           |              | p12.2///chr16:21876382-21877134 (-) // 60.31 //  |
|              |                          |           |           |              | p12.2                                            |
| 235060_at    | <i>LOC100190986///LO</i> | 2.8827617 | 1.5274516 | 2.8827617 up | chr9:94171328-94185962 (-) // 98.7 // q22.31     |
| 203574_at    | <i>NFIL3</i>             | 2.8826041 | 1.5273727 | 2.8826041 up | chr5:179403777-179404187 (-) // 72.35 // q35.3   |
| 236292_at    | <i>RNF130</i>            | 2.882149  | 1.5271449 | 2.882149 up  | chr9:91769131-91771421 (-) // 58.27 // q22.1     |
| 217130_at    |                          | 2.8818743 | 1.5270075 | 2.8818743 up | chr12:19410407-19461995 (+) // 80.85 // p12.3    |
| 214989_x_at  |                          | 2.8784056 | 1.5252699 | 2.8784056 up | chr20:16365839-16366027 (-) // 29.63 // p12.1    |
| 241217_x_at  |                          | 2.877823  | 1.5249779 | 2.877823 up  | chr14:89816615-89831650 (+) // 99.12 // q32.11   |
| 1556004_at   | <i>OTTHUMG00000170</i>   | 2.8765774 | 1.5243533 | 2.8765774 up | chr19:14846368-14887637 (-) // 97.52 // p13.12   |
| 207610_s_at  | <i>EMR2</i>              | 2.875867  | 1.523997  | 2.875867 up  | chr3:121554043-121556919 (+) // 40.95 // q13.33  |
| 1568673_s_at | <i>EAF2</i>              | 2.8711636 | 1.5216355 | 2.8711636 up | chr8:8226720-8227156 (-) // 13.06 // p23.1       |
| 240690_at    |                          | 2.8699424 | 1.5210218 | 2.8699424 up | chr10:42847074-42863445 (-) // 42.64 // q11.21   |
| 1562527_at   | <i>LOC441666</i>         | 2.8680165 | 1.5200533 | 2.8680165 up |                                                  |

|              |                 |           |           |              |
|--------------|-----------------|-----------|-----------|--------------|
| 223800_s_at  | LIMS3//LIMS3L   | 2.865141  | 1.5186061 | 2.865141 up  |
| 204863_s_at  | IL6ST           | 2.8643627 | 1.5182142 | 2.8643627 up |
| 243003_at    |                 | 2.8643248 | 1.5181952 | 2.8643248 up |
| 220398_at    | GNPTAB          | 2.8639874 | 1.5180252 | 2.8639874 up |
| 239012_at    | RNF144B         | 2.863862  | 1.517962  | 2.863862 up  |
| 241837_at    |                 | 2.8634472 | 1.517753  | 2.8634472 up |
| 239017_at    |                 | 2.8621483 | 1.5170984 | 2.8621483 up |
| 234437_at    | OTTHUMG00000172 | 2.8598745 | 1.5159519 | 2.8598745 up |
| 204254_s_at  | VDR             | 2.859022  | 1.5155216 | 2.859022 up  |
| 230263_s_at  | DOCK5           | 2.8586912 | 1.5153548 | 2.8586912 up |
| 239467_at    |                 | 2.857807  | 1.5149084 | 2.857807 up  |
| 1566079_at   | RPS16P5         | 2.8558164 | 1.5139033 | 2.8558164 up |
| 1554564_a_at | SPPL3           | 2.855307  | 1.5136459 | 2.855307 up  |
| 239597_at    |                 | 2.8547866 | 1.5133829 | 2.8547866 up |
| 240962_at    |                 | 2.854265  | 1.5131192 | 2.854265 up  |
| 1553561_at   | TAS2R50         | 2.850594  | 1.5112627 | 2.850594 up  |
| 215516_at    | LAMB4           | 2.8496318 | 1.5107756 | 2.8496318 up |
| 207660_at    | DMD             | 2.8484557 | 1.51018   | 2.8484557 up |
| 235094_at    |                 | 2.8463175 | 1.5090966 | 2.8463175 up |
| 229715_at    | OTTHUMG00000173 | 2.8449655 | 1.5084112 | 2.8449655 up |
| 219957_at    | RUFY2           | 2.8449388 | 1.5083976 | 2.8449388 up |
| 1565131_x_at | MAP3K2          | 2.8429084 | 1.5073676 | 2.8429084 up |
| 237837_at    |                 | 2.8388793 | 1.5053215 | 2.8388793 up |
| 214445_at    | ELL2            | 2.838039  | 1.5048944 | 2.838039 up  |
| 1557865_at   | LOC100505658    | 2.8368285 | 1.5042789 | 2.8368285 up |
| 244659_at    | LOC100131015    | 2.8345695 | 1.5031296 | 2.8345695 up |
| 202893_at    | UNC13B          | 2.8345077 | 1.5030982 | 2.8345077 up |
| 1567679_at   | SNORA74A        | 2.834469  | 1.5030786 | 2.834469 up  |

chr2:110656268-110664027 (+) // 98.23 //  
q13///chr2:109271493-109279252 (+) // 96.68 //  
q12.3///chr2:111222633-111230392 (-) // 98.23 //  
q13  
chr5:55235751-55290772 (-) // 95.76 // q11.2  
chr10:21985066-21986120 (+) // 49.86 // p12.31  
chr12:102189653-102224621 (-) // 93.33 // q23.2  
chr6:18467426-18467963 (-) // 77.31 // p22.3  
chr10:63696316-63696577 (+) // 65.64 // q21.2  
chr8:12483194-12483662 (+) // 71.66 //  
p23.1///chr8:12425093-12425561 (+) // 71.66 //  
p23.1  
chr12:48235321-48298769 (-) // 83.73 // q13.11  
chr8:25272648-25273230 (+) // 94.9 // p21.2  
chr1:198728015-198728472 (+) // 98.25 // q32.1  
chr6:53195951-53200924 (-) // 42.73 // p12.1  
chr12:121209364-121211407 (-) // 61.53 // q24.31  
chr13:28795057-28795484 (+) // 57.37 // q12.2  
chr3:37792895-37793457 (+) // 99.82 // p22.2  
chr12:11138559-11139459 (-) // 99.78 // p13.2  
chr7:107664404-107756574 (-) // 100.0 // q31.1  
chrX:31196311-31285024 (-) // 95.47 // p21.2  
chr19:16189175-16189669 (+) // 95.96 // p13.12  
chr11:17402681-17403207 (+) // 80.15 // p15.1  
chr10:70153520-70167034 (-) // 61.35 // q21.3  
chr2:128100640-128101048 (-) // 62.18 // q14.3  
chr18:60874922-60875400 (+) // 98.76 // q21.33  
chr5:95224518-95297486 (+) // 98.09 // q15  
chr5:140937877-140944827 (+) // 94.73 // q31.3  
chr2:230696869-230697549 (-) // 44.4 // q36.3  
chr9:35162058-35405331 (+) // 99.34 // p13.3  
chr5:138614468-138614668 (-) // 100.0 // q31.2

|                |                        |           |           |              |                                                  |
|----------------|------------------------|-----------|-----------|--------------|--------------------------------------------------|
| 1558686_at     | <i>OTTHUMG00000176</i> | 2.833644  | 1.5026585 | 2.833644 up  | chr16:15506576-15507125 (+) // 65.56 // p13.11   |
| 1569539_at     |                        | 2.8331215 | 1.5023925 | 2.8331215 up | chr3:99733893-99736037 (-) // 41.14 // q12.1     |
| 238987_at      | <i>B4GALT1</i>         | 2.8320005 | 1.5018215 | 2.8320005 up | chr9:33165098-33166102 (-) // 69.41 // p21.1     |
| 1558747_at     | <i>SMCHD1</i>          | 2.831557  | 1.5015956 | 2.831557 up  | chr18:2655885-2697868 (+) // 99.71 // p11.32     |
| 1566284_at     |                        | 2.8302982 | 1.500954  | 2.8302982 up | chr6:111731561-111732043 (-) // 96.56 // q21     |
| 204061_at      | <i>PRKX</i>            | 2.8301353 | 1.5008711 | 2.8301353 up | chrX:3522412-3631649 (-) // 82.9 // p22.33       |
| 244560_at      |                        | 2.8291848 | 1.5003864 | 2.8291848 up | chr2:61175727-61176183 (-) // 97.2 // p16.1      |
| 240260_at      |                        | 2.8266697 | 1.4991033 | 2.8266697 up | chr20:49179093-49179643 (+) // 70.47 // q13.13   |
| 244267_at      | <i>SATB1</i>           | 2.826225  | 1.4988763 | 2.826225 up  | chr3:18459073-18459777 (-) // 96.7 // p24.3      |
| AFFX-BioB-5_at |                        | 2.8257766 | 1.4986475 | 2.8257766 up |                                                  |
| 1566897_at     |                        | 2.8252602 | 1.4983838 | 2.8252602 up | chr12:121241106-121242236 (-) // 77.51 // q24.31 |
| 1554786_at     | <i>CASS4</i>           | 2.824752  | 1.4981242 | 2.824752 up  | chr20:54987363-55028930 (+) // 88.37 // q13.2    |
| 242903_at      | <i>IFNGR1</i>          | 2.8237286 | 1.4976014 | 2.8237286 up | chr6:137523127-137523703 (-) // 96.58 // q23.3   |
| 214077_x_at    | <i>MEIS3P1</i>         | 2.8203056 | 1.4958515 | 2.8203056 up | chr17:15690387-15692443 (+) // 83.49 // p12      |
| 1569316_at     | <i>TRIM24</i>          | 2.8201947 | 1.4957948 | 2.8201947 up | chr7:138272120-138274104 (+) // 66.99 // q34     |
| 201505_at      | <i>LAMB1</i>           | 2.8189237 | 1.4951445 | 2.8189237 up | chr7:107564262-107643804 (-) // 99.91 // q31.1   |
| 237875_at      |                        | 2.817112  | 1.4942169 | 2.817112 up  | chr5:171559356-171559804 (-) // 90.81 // q35.1   |
| 232009_at      | <i>EMR2</i>            | 2.814472  | 1.4928643 | 2.814472 up  | chr19:14843204-14876384 (-) // 50.65 // p13.12   |
| 234061_at      |                        | 2.8125615 | 1.4918847 | 2.8125615 up | chr2:175921807-175923345 (+) // 11.25 // q31.1   |
| 219871_at      | <i>FLJ13197</i>        | 2.8120015 | 1.4915973 | 2.8120015 up | chr4:38614321-38666249 (-) // 74.75 // p14       |
| 1556003_a_at   | <i>OTTHUMG00000176</i> | 2.8110487 | 1.4911084 | 2.8110487 up | chr14:89816615-89831650 (+) // 99.12 // q32.11   |
| 241676_x_at    |                        | 2.8109396 | 1.4910524 | 2.8109396 up | chr7:33691265-33691402 (+) // 25.89 // p14.3     |
| 242008_at      |                        | 2.8108299 | 1.4909961 | 2.8108299 up |                                                  |
| 1564718_at     |                        | 2.8103046 | 1.4907265 | 2.8103046 up | chr8:123917555-123918736 (+) // 55.11 // q24.13  |
| 237422_at      |                        | 2.8086085 | 1.4898555 | 2.8086085 up | chr2:38535627-38536082 (+) // 35.05 // p22.2     |
| 223218_s_at    | <i>NFKBIZ</i>          | 2.8059714 | 1.4885004 | 2.8059714 up | chr3:101568424-101579865 (+) // 90.49 // q12.3   |
| 1569352_at     | <i>FNIP2</i>           | 2.8059707 | 1.4884999 | 2.8059707 up | chr4:159791419-159793881 (+) // 76.69 // q32.1   |
| 205105_at      | <i>MAN2A1</i>          | 2.805917  | 1.4884723 | 2.805917 up  | chr5:109025608-109202858 (+) // 99.83 // q21.3   |
| 242163_at      | <i>THRAP3</i>          | 2.8054104 | 1.4882119 | 2.8054104 up | chr1:36754035-36754722 (+) // 97.99 // p34.3     |
| 243381_at      |                        | 2.8028374 | 1.486888  | 2.8028374 up | chr5:53183199-53183665 (-) // 96.88 // q11.2     |
| 235549_at      | <i>RNF144B</i>         | 2.8026693 | 1.4868015 | 2.8026693 up | chr6:18465317-18466621 (+) // 99.46 // p22.3     |
| 244247_at      |                        | 2.801846  | 1.4863777 | 2.801846 up  | chr2:191805410-191806255 (+) // 65.8 // q32.2    |
| 242937_at      | <i>FOXK2</i>           | 2.800419  | 1.4856428 | 2.800419 up  | chr17:80529435-80530210 (+) // 86.89 // q25.3    |

|              |                     |           |           |              |                                                  |
|--------------|---------------------|-----------|-----------|--------------|--------------------------------------------------|
| 1564798_at   |                     | 2.7987995 | 1.4848082 | 2.7987995 up | chr12:93292535-93293430 (-) // 81.74 // q22      |
| 235217_at    | <i>LOC100216546</i> | 2.798548  | 1.4846785 | 2.798548 up  | chr7:104622189-104623692 (-) // 98.35 // q22.3   |
| 239561_at    |                     | 2.7978776 | 1.4843328 | 2.7978776 up | chr12:116475991-116476468 (-) // 95.3 // q24.21  |
| 1555388_s_at | <i>SNX25</i>        | 2.7976403 | 1.4842105 | 2.7976403 up | chr4:186216980-186284663 (+) // 91.9 // q35.1    |
| 232653_at    |                     | 2.7968106 | 1.4837825 | 2.7968106 up | chr8:116545663-116547087 (-) // 73.21 // q23.3   |
| 215163_at    |                     | 2.7967505 | 1.4837515 | 2.7967505 up | chr3:185506525-185508293 (-) // 60.25 // q27.2   |
| 233007_at    |                     | 2.7963417 | 1.4835407 | 2.7963417 up | chr2:217041490-217042810 (+) // 50.93 // q35     |
| 237928_at    |                     | 2.7931964 | 1.481917  | 2.7931964 up | chr3:136342175-136342597 (-) // 60.31 // q22.3   |
| 219696_at    | <i>DENND1B</i>      | 2.7930937 | 1.481864  | 2.7930937 up | chr1:197478773-197522256 (-) // 98.38 // q31.3   |
| 227613_at    | <i>ZNF331</i>       | 2.7922077 | 1.4814063 | 2.7922077 up | chr19:54081757-54083238 (+) // 35.6 // q13.42    |
| 236438_at    |                     | 2.7881477 | 1.4793069 | 2.7881477 up | chr7:66210125-66219735 (+) // 53.21 // q11.21    |
| 1568695_s_at | <i>INTS6</i>        | 2.787617  | 1.4790324 | 2.787617 up  | chr13:52023245-52027475 (-) // 99.35 // q14.3    |
| 227595_at    | <i>ZMYM6</i>        | 2.7832522 | 1.4767717 | 2.7832522 up | chr1:35452584-35456459 (-) // 30.16 // p34.3     |
| 244162_at    |                     | 2.7831445 | 1.4767158 | 2.7831445 up | chr4:56269590-56270123 (+) // 92.34 // q12       |
| 204440_at    | <i>CD83</i>         | 2.7822495 | 1.4762517 | 2.7822495 up | chr6:14118001-14137107 (+) // 90.06 // p23       |
| 231351_at    |                     | 2.78181   | 1.4760239 | 2.78181 up   | chr11:14606045-14606538 (-) // 82.21 // p15.2    |
| 1569596_at   |                     | 2.7816694 | 1.475951  | 2.7816694 up |                                                  |
| 237184_at    |                     | 2.7815342 | 1.4758809 | 2.7815342 up | chr12:111980691-111981238 (-) // 96.34 // q24.12 |
| 222800_at    | <i>TRNAU1AP</i>     | 2.7810936 | 1.4756523 | 2.7810936 up | chr1:28879604-28905050 (+) // 98.51 // p35.3     |
| 240854_x_at  |                     | 2.779632  | 1.4748939 | 2.779632 up  | chr12:56136331-56136850 (+) // 57.8 // q13.2     |
| 243002_at    |                     | 2.7771175 | 1.4735882 | 2.7771175 up | chr19:7199593-7200044 (-) // 32.47 // p13.2      |
| 243404_at    |                     | 2.7770767 | 1.473567  | 2.7770767 up | chr6:36578752-36579225 (+) // 91.16 // p21.31    |
| 205313_at    | <i>HNF1B</i>        | 2.7764118 | 1.4732215 | 2.7764118 up | chr17:36046434-36105069 (-) // 99.54 // q12      |
| 1557309_at   | <i>DENND1B</i>      | 2.7760017 | 1.4730084 | 2.7760017 up | chr1:197703140-197744556 (-) // 98.61 // q31.3   |
| 236561_at    | <i>TGFBR1</i>       | 2.7745066 | 1.4722313 | 2.7745066 up | chr9:101889941-101890757 (+) // 61.25 // q22.33  |
| 233227_at    | <i>KIAA1109</i>     | 2.7740254 | 1.471981  | 2.7740254 up | chr4:123128388-123148902 (-) // 96.82 // q27     |
| 207283_at    | <i>RPL23AP32</i>    | 2.7727435 | 1.4713142 | 2.7727435 up | chr2:54754706-54756989 (+) // 79.28 // p16.2     |
| 235925_at    |                     | 2.7704246 | 1.4701071 | 2.7704246 up | chr15:57508105-57508763 (+) // 97.75 // q21.3    |
| 205008_s_at  | <i>CIB2</i>         | 2.7701511 | 1.4699647 | 2.7701511 up | chr15:78396991-78423563 (-) // 99.43 // q25.1    |
|              |                     |           |           |              | chr17:41423734-41424196 (+) // 86.8 //           |
|              |                     |           |           |              | q21.31//chr16:20869395-20869857 (-) // 93.07 //  |
| 239648_at    | <i>DCUN1D3</i>      | 2.770027  | 1.4699    | 2.770027 up  | p12.3                                            |

|              |                           |           |           |              |                                                 |
|--------------|---------------------------|-----------|-----------|--------------|-------------------------------------------------|
| 1558075_at   |                           | 2.7680557 | 1.4688729 | 2.7680557 up | chr16:29406297-29509383 (+) // 25.36 //         |
| 238488_at    | <i>IPO11///LRRC70</i>     | 2.7679098 | 1.468797  | 2.7679098 up | p11.2//chr16:30247820-30249355 (+) // 25.36 //  |
| 212195_at    | <i>IL6ST</i>              | 2.7674563 | 1.4685606 | 2.7674563 up | p11.2                                           |
| 232580_x_at  |                           | 2.7660434 | 1.4678239 | 2.7660434 up | chr5:61874642-61877271 (+) // 99.33 // q12.1    |
| 1562031_at   | <i>JAK2</i>               | 2.7649167 | 1.467236  | 2.7649167 up | chr5:55232473-55236010 (-) // 94.85 // q11.2    |
| 242240_at    |                           | 2.7630649 | 1.4662694 | 2.7630649 up | chr2:44449052-44450952 (+) // 54.54 // p21      |
| 203083_at    | <i>THBS2</i>              | 2.762638  | 1.4660466 | 2.762638 up  | chr9:5065804-5068158 (+) // 78.23 // p24.1      |
| 230051_at    | <i>PROSER2</i>            | 2.76247   | 1.4659588 | 2.76247 up   | chr6:169615882-169654128 (-) // 93.95 // q27    |
| 214132_at    | <i>ATP5C1</i>             | 2.762365  | 1.465904  | 2.762365 up  | chr10:11913518-11914274 (+) // 96.42 // p14     |
| 229483_at    |                           | 2.7610672 | 1.4652259 | 2.7610672 up | chr10:7849149-7849764 (+) // 60.86 // p14       |
| 234567_at    |                           | 2.7600958 | 1.4647183 | 2.7600958 up | chr7:129493911-129494647 (-) // 75.47 // q32.2  |
| 226249_at    | <i>SNX30</i>              | 2.7592404 | 1.4642712 | 2.7592404 up | chr17:70938203-70939929 (+) // 93.25 // q25.1   |
| 234640_x_at  |                           | 2.7586014 | 1.463937  | 2.7586014 up | chr9:115634740-115637266 (+) // 95.33 // q32    |
| 1563392_at   |                           | 2.7578876 | 1.4635637 | 2.7578876 up | chr5:180343932-180344617 (-) // 20.99 // q35.3  |
| 1570588_at   |                           | 2.756816  | 1.4630029 | 2.756816 up  | chr21:39770903-39771325 (-) // 96.54 // q22.2   |
| 212196_at    | <i>IL6ST</i>              | 2.754945  | 1.4620235 | 2.754945 up  | chr17:16979351-16981066 (+) // 83.97 // p11.2   |
| 211089_s_at  | <i>NEK3</i>               | 2.7547107 | 1.4619008 | 2.7547107 up | chr5:55232473-55236010 (-) // 94.85 // q11.2    |
| 1566242_at   |                           | 2.754323  | 1.4616978 | 2.754323 up  | chr13:52725280-52728104 (-) // 91.81 // q14.3   |
| 1556568_a_at |                           | 2.753564  | 1.4613001 | 2.753564 up  | chr7:101480047-101481108 (-) // 56.5 // q22.1   |
| 1554982_a_at | <i>EQTN</i>               | 2.7533724 | 1.4611998 | 2.7533724 up | chr17:26460579-26461262 (+) // 76.28 // q11.2   |
| 1556007_s_at | <i>CTB-89H12.4///OTTH</i> | 2.7521265 | 1.4605467 | 2.7521265 up | chr9:27292140-27297134 (-) // 95.71 // p21.2    |
| 1565692_at   |                           | 2.752045  | 1.460504  | 2.752045 up  | chr5:148877415-148882030 (-) // 84.04 // q32    |
| 243876_at    |                           | 2.751075  | 1.4599955 | 2.751075 up  | chr16:22424506-22426383 (-) // 22.59 // p12.2   |
| 240008_at    |                           | 2.7496088 | 1.4592264 | 2.7496088 up | chr9:132733343-132733701 (-) // 45.31 // q34.11 |
| 1553793_a_at | <i>KIAA1109</i>           | 2.7489426 | 1.4588767 | 2.7489426 up | chr6:157223413-157223869 (+) // 76.23 // q25.3  |
| 1562878_at   |                           | 2.7482455 | 1.4585109 | 2.7482455 up | chr4:123183916-123197340 (+) // 97.04 // q27    |
| 208121_s_at  | <i>PTPRO</i>              | 2.747319  | 1.4580244 | 2.747319 up  | chr12:15475486-15750335 (+) // 98.62 // p12.3   |
| 234032_at    |                           | 2.7471967 | 1.4579602 | 2.7471967 up | chr9:37155578-37157194 (+) // 49.05 // p13.2    |
| 220884_at    |                           | 2.746775  | 1.4577386 | 2.746775 up  |                                                 |
| 1557389_at   | <i>SH3PXD2A-AS1</i>       | 2.746522  | 1.4576058 | 2.746522 up  | chr10:105506754-105515167 (+) // 63.82 //       |
| 1556492_a_at | <i>OTTHUMG00000176</i>    | 2.7462466 | 1.4574611 | 2.7462466 up | q24.33                                          |
|              |                           |           |           |              | chr18:44383189-44383858 (-) // 26.03 // q21.1   |

|              |                         |           |           |              |                                                  |
|--------------|-------------------------|-----------|-----------|--------------|--------------------------------------------------|
| 1557527_at   |                         | 2.7457676 | 1.4572095 | 2.7457676 up | chr21:36195757-36198497 (-) // 65.16 // q22.12   |
| 215528_at    |                         | 2.7456908 | 1.4571692 | 2.7456908 up | chr2:134962900-134965147 (+) // 34.81 // q21.2   |
| 213488_at    | <i>SNED1</i>            | 2.7440631 | 1.4563137 | 2.7440631 up | chr2:242031858-242034982 (+) // 93.73 // q37.3   |
| 1552423_at   | <i>ETV3</i>             | 2.7434192 | 1.455975  | 2.7434192 up | chr1:157102938-157108266 (-) // 84.14 // q23.1   |
| 244197_x_at  |                         | 2.7432027 | 1.4558612 | 2.7432027 up | chr12:70677014-70677427 (+) // 52.64 // q15      |
| 242467_at    |                         | 2.7431812 | 1.4558499 | 2.7431812 up | chr5:148896047-148896505 (-) // 90.51 // q32     |
| 244315_at    | <i>PLSCR1</i>           | 2.7428327 | 1.4556667 | 2.7428327 up | chr3:146244999-146245953 (-) // 71.88 // q24     |
| 222371_at    |                         | 2.7428324 | 1.4556665 | 2.7428324 up | chr15:68398224-68398706 (+) // 83.48 // q23      |
| 208869_s_at  | <i>GABARAPL1</i>        | 2.7421877 | 1.4553274 | 2.7421877 up | chr12:10365448-10375722 (+) // 98.5 // p13.2     |
| 234822_at    | <i>OTTHUMG00000176</i>  | 2.7421622 | 1.4553139 | 2.7421622 up | chr16:79015618-79015740 (-) // 95.16 // q23.1    |
| 223966_at    | <i>LOC100128180</i>     | 2.7420874 | 1.4552746 | 2.7420874 up | chr4:103729628-103730878 (-) // 81.64 // q24     |
| 1558759_s_at | <i>CLASP2</i>           | 2.7383604 | 1.4533124 | 2.7383604 up | chr3:33643695-33686975 (-) // 92.52 // p22.3     |
| 242134_at    |                         | 2.7372751 | 1.4527404 | 2.7372751 up | chr3:114047983-114048556 (+) // 97.95 // q13.31  |
| 1565130_at   | <i>MAP3K2</i>           | 2.7348351 | 1.4514539 | 2.7348351 up | chr2:128100640-128101048 (-) // 62.18 // q14.3   |
| 243861_at    | <i>FNIP1</i>            | 2.7332733 | 1.4506297 | 2.7332733 up | chr5:131051284-131051851 (-) // 75.39 // q31.1   |
| 228426_at    | <i>CLEC2D</i>           | 2.7321384 | 1.4500306 | 2.7321384 up | chr12:9847076-9847724 (+) // 65.08 // p13.31     |
| 1554905_x_at | <i>FRMD8</i>            | 2.73158   | 1.4497356 | 2.73158 up   | chr11:65154107-65154728 (+) // 86.03 // q13.1    |
| 229307_at    | <i>ANKRD28</i>          | 2.72776   | 1.4477167 | 2.72776 up   | chr3:15822941-15839579 (-) // 90.26 // p25.1     |
| 237341_at    |                         | 2.727414  | 1.4475336 | 2.727414 up  | chr8:10226217-10226761 (+) // 100.0 // p23.1     |
| 222786_at    | <i>CHST12</i>           | 2.7272344 | 1.4474387 | 2.7272344 up | chr7:2472195-2473768 (+) // 72.79 // p22.3       |
| 241071_at    |                         | 2.7272003 | 1.4474206 | 2.7272003 up | chr1:8517295-8517712 (+) // 79.57 // p36.23      |
| 242376_at    |                         | 2.7268724 | 1.4472473 | 2.7268724 up | chr19:39935177-39935734 (-) // 24.69 // q13.2    |
| 209729_at    | <i>GAS2L1</i>           | 2.7262516 | 1.4469187 | 2.7262516 up | chr22:29703044-29708773 (+) // 96.32 // q12.2    |
| 239200_at    |                         | 2.7248678 | 1.4461863 | 2.7248678 up |                                                  |
| 1570165_at   |                         | 2.724367  | 1.4459211 | 2.724367 up  | chr12:104923666-104925243 (+) // 58.89 // q23.3  |
|              |                         |           |           |              | chrX:155227210-155242719 (+) // 60.66 //         |
| 214950_at    |                         | 2.7235692 | 1.4454985 | 2.7235692 up | q28///chrY:59330216-59345725 (+) // 60.66 // q12 |
| 232963_at    |                         | 2.723165  | 1.4452844 | 2.723165 up  | chr1:175945406-175948465 (-) // 80.73 // q25.1   |
| 241667_x_at  |                         | 2.7223887 | 1.4448731 | 2.7223887 up | chr13:41161305-41161422 (-) // 66.86 // q14.11   |
|              |                         |           |           |              | chr16:29454376-29465883 (-) // 92.88 //          |
|              |                         |           |           |              | p11.2///chr16:29556141-30205225 (-) // 92.68 //  |
| 210396_s_at  | <i>BOLA2//LOC101060</i> | 2.7206328 | 1.4439422 | 2.7206328 up | p11.2                                            |
| 212579_at    | <i>SMCHD1</i>           | 2.7202473 | 1.4437377 | 2.7202473 up | chr18:2739473-2805012 (+) // 91.02 // p11.32     |
| 216965_x_at  | <i>SPG20</i>            | 2.7193575 | 1.4432658 | 2.7193575 up | chr13:36900059-36920420 (-) // 84.51 // q13.3    |

|             |                           |           |           |              |                                                  |
|-------------|---------------------------|-----------|-----------|--------------|--------------------------------------------------|
| 213516_at   | <i>AKAP13</i>             | 2.7144928 | 1.4406826 | 2.7144928 up | chr15:86125012-86287347 (+) // 97.47 // q25.3    |
| 239441_at   | <i>ZNF780A</i>            | 2.7141209 | 1.440485  | 2.7141209 up | chr19:40579162-40579865 (-) // 61.26 // q13.2    |
| 229695_at   |                           | 2.7136548 | 1.4402372 | 2.7136548 up | chr10:14566477-14568421 (-) // 73.3 // p13       |
| 1556818_at  |                           | 2.7128706 | 1.4398203 | 2.7128706 up | chr6:157408473-157408939 (+) // 65.95 // q25.3   |
|             |                           |           |           |              | chr2:109368234-109368756 (+) // 89.25 //         |
|             |                           |           |           |              | q12.3///chr2:110582314-110582835 (+) // 88.29 // |
|             |                           |           |           |              | q13///chr2:108476085-108476605 (+) // 87.72 //   |
|             |                           |           |           |              | q12.3///chr2:87201711-87202233 (+) // 87.33 //   |
|             |                           |           |           |              | p11.2///chr2:107052274-107052794 (-) // 88.1 //  |
|             |                           |           |           |              | q12.2///chr2:111303825-111304346 (-) // 88.29 // |
|             |                           |           |           |              | q13///chr2:113158388-113158909 (-) // 88.29 //   |
|             |                           |           |           |              | q13///chr2:88094329-88094851 (-) // 87.33 //     |
|             |                           |           |           |              | p11.2                                            |
| 242712_x_at | <i>RANBP2///RGPD1///I</i> | 2.7093673 | 1.437956  | 2.7093673 up | chr3:152045854-152047253 (+) // 93.44 // q25.1   |
| 238558_at   |                           | 2.707358  | 1.4368856 | 2.707358 up  | chr20:23059994-23066977 (-) // 98.64 // p11.21   |
| 202878_s_at | <i>CD93</i>               | 2.7060635 | 1.4361957 | 2.7060635 up | chr3:73097623-73098238 (+) // 82.2 // p13        |
| 1560926_at  |                           | 2.7038639 | 1.4350225 | 2.7038639 up | chr15:30941032-30941725 (+) // 82.28 // q13.2    |
| 242723_at   | <i>OTTHUMG00000183</i>    | 2.7016747 | 1.433854  | 2.7016747 up | chr9:99403536-99417473 (-) // 78.46 // q22.33    |
| 227534_at   | <i>AAED1</i>              | 2.701224  | 1.4336133 | 2.701224 up  | chr15:81188531-81244380 (-) // 97.9 // q25.1     |
| 239747_s_at | <i>OTTHUMG00000172</i>    | 2.7008736 | 1.4334261 | 2.7008736 up | chr4:25849005-25849487 (+) // 92.51 // p15.2     |
| 230232_at   | <i>SEL1L3</i>             | 2.7008126 | 1.4333935 | 2.7008126 up | chr9:7121164-7121808 (+) // 31.31 // p24.1       |
| 236732_at   |                           | 2.7002797 | 1.4331088 | 2.7002797 up | chr16:29471246-29476234 (+) // 80.0 //           |
|             |                           |           |           |              | p11.2///chr16:30210588-30215579 (+) // 80.0 //   |
|             |                           |           |           |              | p11.2                                            |
| 210580_x_at | <i>LOC101060714///SL</i>  | 2.7001638 | 1.4330469 | 2.7001638 up | chr17:5204290-5205066 (+) // 15.8 // p13.2       |
| 239758_at   |                           | 2.6997325 | 1.4328165 | 2.6997325 up | chr5:137203573-137223541 (+) // 98.4 // q31.2    |
| 219728_at   | <i>MYOT</i>               | 2.6954916 | 1.4305484 | 2.6954916 up | chr5:60838044-60838415 (-) // 94.2 // q12.1      |
| 237462_at   |                           | 2.6934988 | 1.4294815 | 2.6934988 up | chr2:109335936-109400560 (+) // 99.96 // q12.3   |
| 201713_s_at | <i>RANBP2</i>             | 2.6931012 | 1.4292685 | 2.6931012 up | chr10:18828122-18837166 (-) // 56.59 // p12.31   |
| 222128_at   | <i>NSUN6</i>              | 2.692954  | 1.4291897 | 2.692954 up  | chr11:70116814-70224498 (+) // 97.94 // q13.3    |
| 210236_at   | <i>PPFIA1</i>             | 2.6925664 | 1.4289819 | 2.6925664 up | chr2:25264998-25370757 (+) // 76.75 // p23.3     |
| 215334_at   | <i>EFR3B</i>              | 2.6925395 | 1.4289675 | 2.6925395 up |                                                  |
| 1570628_at  |                           | 2.6910927 | 1.4281921 | 2.6910927 up |                                                  |
| 239923_at   |                           | 2.6909606 | 1.4281213 | 2.6909606 up | chr6:108896100-108896581 (+) // 96.57 // q21     |

|              |                   |           |           |              |                                                  |
|--------------|-------------------|-----------|-----------|--------------|--------------------------------------------------|
| 235167_at    | LOC100190986///LO | 2.6902537 | 1.4277422 | 2.6902537 up | chr16:21444892-21445979 (-) // 17.02 //          |
| 1559490_at   | LRCH3             | 2.689571  | 1.427376  | 2.689571 up  | p12.2///chr16:29423573-29424653 (-) // 16.58 //  |
| 1561079_at   | ANKRD28           | 2.6884832 | 1.4267925 | 2.6884832 up | p11.2                                            |
| 237926_s_at  |                   | 2.688153  | 1.4266152 | 2.688153 up  | chr3:197557327-197560252 (+) // 62.27 // q29     |
| 1568903_at   |                   | 2.6876185 | 1.4263284 | 2.6876185 up | chr19:45360968-45361580 (-) // 25.08 // q13.32   |
| 233853_at    |                   | 2.6875222 | 1.4262767 | 2.6875222 up | chr8:103268619-103270048 (+) // 98.82 // q22.3   |
| 242563_at    |                   | 2.6873713 | 1.4261956 | 2.6873713 up | chr7:65598910-65917175 (-) // 43.36 // q11.21    |
| 1559362_at   |                   | 2.6860151 | 1.4254675 | 2.6860151 up | chr11:72770774-72771610 (-) // 88.59 // q13.4    |
| 1557452_at   |                   | 2.6855714 | 1.4252291 | 2.6855714 up | chr11:116941485-116942325 (-) // 17.07 // q23.3  |
| 242920_at    |                   | 2.6812458 | 1.4229035 | 2.6812458 up | chr5:80999628-81000513 (-) // 72.32 // q14.1     |
| 236978_at    |                   | 2.6804671 | 1.4224844 | 2.6804671 up | chr11:116752266-116752587 (-) // 49.23 // q23.3  |
| 238409_x_at  | OXR1              | 2.6804082 | 1.4224528 | 2.6804082 up | chr17:60076310-60076636 (-) // 95.04 // q23.2    |
| 218284_at    | SMAD3             | 2.6796143 | 1.4220253 | 2.6796143 up | chr8:107749671-107749839 (+) // 60.67 // q23.1   |
| 203587_at    | ARL4D             | 2.6792536 | 1.4218311 | 2.6792536 up | chr15:67485493-67487507 (+) // 99.01 // q22.33   |
| 1552690_a_at | CACNA2D4          | 2.6774395 | 1.420854  | 2.6774395 up | chr17:41477026-41478503 (+) // 69.02 // q21.31   |
| 241637_at    |                   | 2.6770177 | 1.4206266 | 2.6770177 up | chr12:1902006-2028002 (-) // 99.02 // p13.33     |
| 230651_at    |                   | 2.6765137 | 1.4203551 | 2.6765137 up | chr16:72644282-72644616 (+) // 57.94 // q22.2    |
| 1570339_x_at |                   | 2.675811  | 1.4199762 | 2.675811 up  | chrX:122738234-122738705 (-) // 97.72 // q25     |
| 1562894_at   |                   | 2.673204  | 1.4185699 | 2.673204 up  | chr2:242696703-242697330 (+) // 56.33 // q37.3   |
| 241336_at    |                   | 2.672937  | 1.4184258 | 2.672937 up  | chr7:37100640-37102080 (-) // 97.89 // p14.2     |
| 234651_at    |                   | 2.6705146 | 1.4171177 | 2.6705146 up | chr3:129172902-129173240 (+) // 19.53 // q21.3   |
| 244841_at    | SEC24A            | 2.669711  | 1.4166837 | 2.669711 up  | chr7:152050583-152051958 (+) // 29.48 // q36.1   |
| 221283_at    | RUNX2             | 2.669545  | 1.4165938 | 2.669545 up  | chr5:134028986-134029387 (+) // 98.04 // q31.1   |
| 238433_at    | SNX5              | 2.6684408 | 1.415997  | 2.6684408 up | chr6:45390313-45515042 (-) // 90.94 // p21.1     |
| 204391_x_at  | TRIM24            | 2.6677563 | 1.4156269 | 2.6677563 up | chr20:17941406-17942870 (-) // 91.64 // p11.23   |
| 208219_at    | ACVR1B            | 2.6676059 | 1.4155456 | 2.6676059 up | chr7:138145179-138270330 (+) // 95.9 // q33      |
| 1566446_at   |                   | 2.6642134 | 1.4137096 | 2.6642134 up | chr12:52345485-52381131 (+) // 98.3 // q13.13    |
| 242622_x_at  | PTEN              | 2.663591  | 1.4133725 | 2.663591 up  | chr13:74489850-74494758 (-) // 79.7 // q22.1     |
| 236919_at    |                   | 2.6630425 | 1.4130754 | 2.6630425 up | chr10:89655017-89655462 (+) // 88.33 // q23.31   |
| 243158_at    |                   | 2.662488  | 1.412775  | 2.662488 up  | chr18:43808671-43809190 (+) // 74.61 // q21.1    |
| 237014_at    | MYBL1             | 2.662267  | 1.4126552 | 2.662267 up  | chr10:104862308-104863704 (-) // 63.67 // q24.32 |
|              |                   |           |           |              | chr8:67524344-67524924 (+) // 93.39 // q13.1     |



|              |                         |           |           |              |                                                  |
|--------------|-------------------------|-----------|-----------|--------------|--------------------------------------------------|
| 1559119_at   |                         | 2.6614554 | 1.4122154 | 2.6614554 up | chr11:68328750-68329713 (-) // 2.84 // q13.2     |
| 1560721_at   |                         | 2.661335  | 1.4121501 | 2.661335 up  | chr1:155462235-155463874 (-) // 28.9 // q22      |
| 1563128_at   |                         | 2.6601412 | 1.4115028 | 2.6601412 up | chr5:118463895-118464751 (+) // 38.65 // q23.1   |
| 1563120_at   | <i>AC005042.4//OTTH</i> | 2.659754  | 1.4112928 | 2.659754 up  | chr2:159535168-159535902 (-) // 80.48 // q24.1   |
| 223000_s_at  | <i>F11R</i>             | 2.6584432 | 1.4105816 | 2.6584432 up | chr1:160965984-160990925 (-) // 84.32 // q23.3   |
| 243581_at    | <i>OTTHUMG00000024</i>  | 2.6584272 | 1.410573  | 2.6584272 up | chr1:161861532-161861977 (+) // 100.0 // q23.3   |
| 240458_at    |                         | 2.6572025 | 1.4099082 | 2.6572025 up | chr12:26559387-26559818 (-) // 99.08 // p11.23   |
| 241402_at    | <i>TSEN54</i>           | 2.6564722 | 1.4095116 | 2.6564722 up | chr17:73518495-73519049 (+) // 68.77 // q25.1    |
| 236757_at    |                         | 2.6564176 | 1.409482  | 2.6564176 up | chr10:52255744-52256350 (-) // 93.01 // q11.23   |
| 243092_at    | <i>PAN3-AS1</i>         | 2.6525805 | 1.4073966 | 2.6525805 up | chr13:28710878-28711523 (-) // 63.1 // q12.2     |
| 217263_x_at  | <i>LOC100506403//RU</i> | 2.651204  | 1.4066478 | 2.651204 up  | chr21:36228585-36231877 (-) // 73.59 // q22.12   |
| 240141_at    |                         | 2.650264  | 1.4061362 | 2.650264 up  | chr5:78946758-78947218 (+) // 91.52 // q14.1     |
| 229155_at    |                         | 2.6486948 | 1.4052815 | 2.6486948 up | chr10:106063569-106064708 (+) // 77.6 // q25.1   |
| 1561733_at   |                         | 2.6471055 | 1.4044156 | 2.6471055 up | chr10:134400249-134401517 (+) // 70.95 // q26.3  |
| 206520_x_at  | <i>SIGLEC6</i>          | 2.6449966 | 1.403266  | 2.6449966 up | chr19:52022982-52034893 (-) // 81.06 // q13.41   |
| 215042_at    | <i>BMP6</i>             | 2.6417162 | 1.4014755 | 2.6417162 up | chr6:7881550-7889842 (+) // 99.02 // p24.3       |
| 1554965_at   | <i>FILIP1L</i>          | 2.6402838 | 1.400693  | 2.6402838 up | chr3:99551987-99833357 (-) // 98.8 // q12.1      |
| 233633_at    | <i>TBL1XR1</i>          | 2.6400065 | 1.4005415 | 2.6400065 up | chr3:176749688-176750764 (-) // 85.36 // q26.32  |
| 208836_at    | <i>ATP1B3</i>           | 2.639995  | 1.4005352 | 2.639995 up  | chr3:141595615-141645042 (+) // 100.0 // q23     |
| 1561908_a_at | <i>HS3ST3B1</i>         | 2.6396446 | 1.4003437 | 2.6396446 up | chr17:14249586-14250454 (-) // 66.25 // p12      |
| 241797_at    |                         | 2.6392386 | 1.4001218 | 2.6392386 up | chr19:13139357-13139980 (+) // 89.76 // p13.2    |
| 236471_at    | <i>NFE2L3</i>           | 2.6380727 | 1.3994843 | 2.6380727 up | chr7:26226311-26226745 (+) // 94.97 // p15.2     |
| 240759_at    |                         | 2.6375272 | 1.399186  | 2.6375272 up | chr3:195076025-195076498 (-) // 99.58 // q29     |
| 1555055_at   | <i>AVL9</i>             | 2.635197  | 1.3979108 | 2.635197 up  | chr7:32535185-33079034 (+) // 97.5 // p14.3      |
| 1565689_at   |                         | 2.6350462 | 1.3978283 | 2.6350462 up | chr13:50342737-50580129 (-) // 7.91 // q14.2     |
| 214712_at    | <i>SNX29P2</i>          | 2.634657  | 1.3976151 | 2.634657 up  | chr16:29262828-29650579 (+) // 54.47 // p11.2    |
| 232354_at    | <i>OTTHUMG00000168</i>  | 2.6341543 | 1.3973398 | 2.6341543 up | chr12:123370957-123373267 (-) // 57.7 // q24.31  |
| 232537_x_at  | <i>MARK3</i>            | 2.6336644 | 1.3970715 | 2.6336644 up | chr14:103913038-103915749 (+) // 53.32 // q32.32 |
| 237195_at    |                         | 2.6336107 | 1.3970422 | 2.6336107 up | chr9:125905033-125905688 (-) // 92.16 // q33.3   |
| 1569512_at   |                         | 2.6334786 | 1.3969698 | 2.6334786 up | chr10:29936275-29937809 (-) // 89.43 // p11.23   |
| 241057_x_at  |                         | 2.6320598 | 1.3961923 | 2.6320598 up | chr13:51968001-51968342 (+) // 97.13 // q14.3    |
| 231632_at    | <i>C19orf69</i>         | 2.632024  | 1.3961726 | 2.632024 up  | chr19:41950212-41950686 (+) // 50.0 // q13.2     |
| 226130_at    | <i>RPS16</i>            | 2.6302645 | 1.3952079 | 2.6302645 up | chr19:39923776-39925018 (-) // 91.59 // q13.2    |

|              |                   |           |           |              |                                                  |
|--------------|-------------------|-----------|-----------|--------------|--------------------------------------------------|
| 236907_at    |                   | 2.629732  | 1.3949157 | 2.629732 up  | chr8:101731630-101732108 (-) // 100.0 // q22.3   |
| 239393_at    |                   | 2.6295953 | 1.3948407 | 2.6295953 up | chr13:28848194-28848833 (+) // 87.95 // q12.2    |
| 1553672_at   | <i>ENAH</i>       | 2.6294544 | 1.3947635 | 2.6294544 up | chr1:225706747-225840788 (-) // 80.31 // q42.12  |
| 244423_at    |                   | 2.6294327 | 1.3947515 | 2.6294327 up | chr10:14600597-14601094 (-) // 91.24 // p13      |
| 223797_at    | <i>PRO2852</i>    | 2.627146  | 1.3934964 | 2.627146 up  | chr9:34186266-34188019 (+) // 56.19 // p13.3     |
| 239131_at    |                   | 2.6259127 | 1.3928189 | 2.6259127 up | chr20:49517327-49517858 (+) // 96.37 // q13.13   |
| 239957_at    |                   | 2.625438  | 1.3925581 | 2.625438 up  | chr3:9502458-9502927 (+) // 57.14 // p25.3       |
| 1561762_s_at |                   | 2.6250057 | 1.3923206 | 2.6250057 up | chr10:12061056-12061478 (-) // 21.99 // p14      |
| 1560929_at   |                   | 2.6249495 | 1.3922896 | 2.6249495 up | chr9:114991487-114992595 (-) // 36.56 // q32     |
| 243626_at    |                   | 2.62486   | 1.3922405 | 2.62486 up   | chr8:12424543-12425166 (+) // 59.84 // p23.1     |
| 240326_at    |                   | 2.6247885 | 1.3922012 | 2.6247885 up | chr11:10160085-10160642 (-) // 29.67 // p15.4    |
| 204542_at    | <i>ST6GALNAC2</i> | 2.6245978 | 1.3920964 | 2.6245978 up | chr17:74561460-74581929 (-) // 98.9 // q25.1     |
| 1565861_at   |                   | 2.623703  | 1.3916044 | 2.623703 up  | chr2:61524894-61525509 (-) // 61.61 // p15       |
| 233219_at    |                   | 2.6233711 | 1.3914219 | 2.6233711 up | chr7:131168470-131169934 (+) // 9.16 // q32.3    |
| 1566709_at   |                   | 2.6229846 | 1.3912094 | 2.6229846 up | chr5:118705944-118707935 (-) // 70.57 // q23.1   |
| 238774_at    |                   | 2.6214352 | 1.3903569 | 2.6214352 up | chr17:44213088-44213572 (-) // 65.16 // q21.31   |
| 236931_at    |                   | 2.621285  | 1.3902742 | 2.621285 up  | chr11:3901864-3902318 (+) // 96.15 // p15.4      |
| 236924_at    |                   | 2.6212223 | 1.3902397 | 2.6212223 up | chr1:92714840-92715226 (-) // 54.04 // p22.1     |
| 232341_x_at  | <i>HABP4</i>      | 2.618077  | 1.3885076 | 2.618077 up  | chr9:99220659-99253617 (+) // 91.35 // q22.32    |
| 219569_s_at  | <i>SLC35G2</i>    | 2.6171608 | 1.3880025 | 2.6171608 up | chr3:136537977-136574729 (+) // 98.52 // q22.3   |
| 203115_at    | <i>FECH</i>       | 2.6148794 | 1.3867444 | 2.6148794 up | chr18:55215536-55254020 (-) // 99.2 // q21.31    |
| 211357_s_at  | <i>ALDOB</i>      | 2.6138103 | 1.3861544 | 2.6138103 up | chr9:104183658-104184069 (-) // 67.16 // q31.1   |
| 244648_at    |                   | 2.6122692 | 1.3853036 | 2.6122692 up | chr2:118743758-118744517 (-) // 89.15 // q14.1   |
| 239511_s_at  | <i>SRSF4</i>      | 2.6120503 | 1.3851826 | 2.6120503 up | chr1:29495748-29496417 (-) // 87.39 // p35.3     |
| 243450_at    |                   | 2.611764  | 1.3850245 | 2.611764 up  | chr15:86050320-86050615 (+) // 24.75 // q25.3    |
| 238883_at    |                   | 2.6113696 | 1.3848066 | 2.6113696 up | chr12:116663867-116664366 (-) // 78.44 // q24.21 |
| 237561_x_at  |                   | 2.6095371 | 1.383794  | 2.6095371 up | chr19:16193045-16193822 (+) // 21.74 // p13.12   |
| 239286_at    | <i>CDH11</i>      | 2.608513  | 1.3832277 | 2.608513 up  | chr16:64977663-64978100 (-) // 21.92 // q21      |
| 1565898_at   | <i>METTL15</i>    | 2.6081824 | 1.3830447 | 2.6081824 up | chr11:28145058-28147411 (+) // 97.12 // p14.1    |
| 213497_at    | <i>ABTB2</i>      | 2.6076345 | 1.3827417 | 2.6076345 up | chr11:34172534-34181835 (-) // 98.48 // p13      |
|              |                   |           |           |              | chr17:45501520-45504005 (+) // 96.41 //          |
|              |                   |           |           |              | q21.32///chr18:57636940-57639114 (+) // 96.87 // |
|              |                   |           |           |              | q21.32///chr7:26192508-26225882 (+) // 100.0 //  |
| 204702_s_at  | <i>NFE2L3</i>     | 2.6048455 | 1.3811978 | 2.6048455 up | p15.2                                            |

|              |                  |           |           |              |                                                 |
|--------------|------------------|-----------|-----------|--------------|-------------------------------------------------|
| 1553020_at   | SMCR5            | 2.604462  | 1.3809854 | 2.604462 up  | chr17:17680119-17682843 (-) // 56.95 // p11.2   |
| 1556672_a_at | RBM6             | 2.6041017 | 1.3807858 | 2.6041017 up | chr3:50034539-50037202 (+) // 99.85 // p21.31   |
| 232134_at    |                  | 2.603885  | 1.3806657 | 2.603885 up  | chr5:6728969-6730951 (+) // 91.52 // p15.31     |
| 242362_at    |                  | 2.603526  | 1.3804669 | 2.603526 up  | chr2:225374951-225375743 (-) // 96.1 // q36.2   |
| 210919_at    | PHLPP1           | 2.601596  | 1.379397  | 2.601596 up  | chr18:60504967-60507108 (-) // 53.66 // q21.33  |
| 242695_at    |                  | 2.6013682 | 1.3792706 | 2.6013682 up | chr12:62793911-62794393 (+) // 33.11 // q14.1   |
| 237650_at    |                  | 2.6005914 | 1.3788397 | 2.6005914 up | chr1:174829115-174829626 (-) // 69.14 // q25.1  |
| 238114_at    | PCMTD1           | 2.598702  | 1.3777912 | 2.598702 up  | chr8:52762085-52762535 (-) // 96.57 // q11.23   |
| 232125_at    |                  | 2.5971215 | 1.3769135 | 2.5971215 up | chr3:114053743-114056098 (-) // 98.73 // q13.31 |
| 241893_at    |                  | 2.5970855 | 1.3768935 | 2.5970855 up | chr2:134904588-134905269 (+) // 75.58 // q21.2  |
| 244358_at    |                  | 2.5960548 | 1.3763208 | 2.5960548 up | chr6:108943659-108944151 (+) // 90.02 // q21    |
| 1556812_a_at |                  | 2.5953836 | 1.3759478 | 2.5953836 up | chr2:197961283-197961876 (-) // 91.04 // q33.1  |
| 223802_s_at  | RBBP6            | 2.594984  | 1.3757256 | 2.594984 up  | chr16:24551672-24552502 (+) // 99.64 // p12.1   |
| 235477_at    |                  | 2.594372  | 1.3753854 | 2.594372 up  | chr9:35603433-35604377 (-) // 99.68 // p13.3    |
| 242616_at    |                  | 2.5939114 | 1.3751292 | 2.5939114 up | chr11:43783306-43783715 (+) // 32.05 // p11.2   |
| 232521_at    | PCSK7            | 2.5935545 | 1.3749306 | 2.5935545 up | chr11:117087178-117089674 (-) // 83.12 // q23.3 |
| 243046_at    |                  | 2.5931    | 1.3746779 | 2.5931 up    | chr4:103726644-103727459 (-) // 39.54 // q24    |
| 237470_at    | DOCK7            | 2.5911672 | 1.3736022 | 2.5911672 up | chr1:63049776-63050121 (-) // 95.04 // p31.3    |
| 209170_s_at  | GPM6B            | 2.591073  | 1.3735497 | 2.591073 up  | chrX:13792098-13835153 (-) // 90.8 // p22.2     |
| 231555_at    |                  | 2.5910003 | 1.3735092 | 2.5910003 up | chr12:102153513-102154007 (+) // 97.82 // q23.2 |
| 214657_s_at  | MIR612//NEAT1    | 2.590482  | 1.3732206 | 2.590482 up  | chr11:65190998-65192453 (+) // 96.04 // q13.1   |
| 215620_at    | RREB1            | 2.5890918 | 1.3724461 | 2.5890918 up | chr6:7183315-7185801 (+) // 72.8 // p24.3       |
|              |                  |           |           |              | chr9:69651360-69665400 (+) // 97.63 //          |
|              |                  |           |           |              | q21.11//chr9:67289409-67303437 (+) // 97.28 //  |
|              |                  |           |           |              | q13//chr9:67016948-67030982 (-) // 97.48 //     |
|              |                  |           |           |              | q13//chr9:42843943-42857993 (-) // 97.38 // p12 |
| 1564277_a_at | LOC100133920//LO | 2.588291  | 1.3719997 | 2.588291 up  | chr14:93118417-93155338 (+) // 99.0 // q32.12   |
| 219456_s_at  | RIN3             | 2.5879107 | 1.3717878 | 2.5879107 up | chr3:160117480-160132288 (+) // 85.73 // q25.33 |
| 215623_x_at  | SMC4             | 2.5876362 | 1.3716348 | 2.5876362 up | chr9:115391391-115392115 (+) // 98.1 // q32     |
| 239033_at    |                  | 2.5873    | 1.3714473 | 2.5873 up    | chr3:44483133-44483559 (-) // 67.85 // p21.31   |
| 229766_at    | ZNF445           | 2.5853548 | 1.3703623 | 2.5853548 up | chr6:157297460-157298225 (+) // 56.75 // q25.3  |
| 1558822_at   |                  | 2.585164  | 1.3702558 | 2.585164 up  | chr1:235387015-235387576 (-) // 92.73 // q42.3  |
| 235959_at    |                  | 2.5841138 | 1.3696697 | 2.5841138 up | chr20:39676111-39676780 (+) // 52.32 // q12     |
| 239404_at    |                  | 2.5831623 | 1.3691382 | 2.5831623 up | chr2:61524557-61525499 (+) // 62.72 // p15      |
| 1565860_at   |                  | 2.5827942 | 1.3689327 | 2.5827942 up |                                                 |

|              |                          |           |           |              |                                                  |
|--------------|--------------------------|-----------|-----------|--------------|--------------------------------------------------|
| 215032_at    | <i>RREB1</i>             | 2.5822515 | 1.3686296 | 2.5822515 up | chr6:7220744-7223042 (+) // 70.51 // p24.3       |
| 240383_at    | <i>UBE2D3</i>            | 2.5806148 | 1.3677148 | 2.5806148 up | chr4:103731527-103732000 (-) // 55.89 // q24     |
| 239751_at    | <i>AC016831.7///OTTH</i> | 2.5799954 | 1.3673685 | 2.5799954 up | chr7:130612277-130612844 (+) // 96.21 // q32.3   |
| 233595_at    | <i>USP34</i>             | 2.5796487 | 1.3671746 | 2.5796487 up | chr2:61451715-61452816 (-) // 7.78 // p15        |
| 231109_at    |                          | 2.57749   | 1.3659669 | 2.57749 up   | chr10:11237660-11237997 (+) // 91.41 // p14      |
| 1554822_at   | <i>PHTF2</i>             | 2.576558  | 1.3654451 | 2.576558 up  | chr7:77469446-77553449 (+) // 96.32 // q11.23    |
| 215232_at    | <i>ARHGAP44</i>          | 2.5762017 | 1.3652456 | 2.5762017 up | chr17:12887845-12892418 (+) // 83.05 // p12      |
| 1557477_at   | <i>STIM1</i>             | 2.5753067 | 1.3647442 | 2.5753067 up | chr11:4000040-4001930 (+) // 70.7 // p15.4       |
| 233099_at    |                          | 2.5742059 | 1.3641274 | 2.5742059 up | chr7:133116744-133121254 (+) // 78.28 // q33     |
| 241092_at    |                          | 2.5733962 | 1.3636736 | 2.5733962 up | chr3:107313120-107313641 (+) // 59.12 // q13.12  |
| 239358_at    |                          | 2.5712595 | 1.3624753 | 2.5712595 up | chr8:11688349-11688814 (+) // 98.5 // p23.1      |
| 1557521_a_at |                          | 2.5695295 | 1.3615042 | 2.5695295 up | chr20:36129859-36132023 (-) // 32.01 // q11.23   |
| 236946_at    |                          | 2.5693629 | 1.3614106 | 2.5693629 up | chr2:54082280-54082678 (-) // 63.73 // p16.2     |
| 1563455_at   | <i>SIK3</i>              | 2.5692575 | 1.3613515 | 2.5692575 up | chr11:116821216-116827259 (-) // 50.89 // q23.3  |
| 1554565_x_at | <i>SPPL3</i>             | 2.5669756 | 1.3600695 | 2.5669756 up | chr12:121209364-121211407 (-) // 61.53 // q24.31 |
| 1563498_s_at | <i>SLC25A45</i>          | 2.5664735 | 1.3597873 | 2.5664735 up | chr11:65138847-65147149 (-) // 77.77 // q13.1    |
| 243463_s_at  | <i>RIT1</i>              | 2.5663624 | 1.3597249 | 2.5663624 up | chr1:155867600-155867978 (-) // 100.0 // q22     |
| 235701_at    |                          | 2.5654097 | 1.3591893 | 2.5654097 up | chr12:57761837-57762303 (-) // 28.48 // q13.3    |
| 1562439_at   | <i>NCOA3</i>             | 2.5652943 | 1.3591243 | 2.5652943 up | chr20:46130674-46133200 (+) // 91.86 // q13.12   |
| 216436_at    | <i>PIK3R4</i>            | 2.5650098 | 1.3589643 | 2.5650098 up | chr3:130446068-130447930 (+) // 74.17 // q22.1   |
| 242721_at    |                          | 2.5645225 | 1.3586903 | 2.5645225 up | chr7:69464304-69464758 (+) // 36.11 // q11.22    |
| 216966_at    | <i>ITGA2B</i>            | 2.5644877 | 1.3586706 | 2.5644877 up | chr17:42452078-42453552 (-) // 48.73 // q21.31   |
| 223937_at    | <i>FOXP1</i>             | 2.5642278 | 1.3585244 | 2.5642278 up | chr3:71247035-71633090 (-) // 94.7 // p13        |
| 1556496_a_at | <i>OTTHUMG0000017</i>    | 2.5640826 | 1.3584428 | 2.5640826 up | chr8:101925478-101926002 (-) // 98.13 // q22.3   |
| 237673_at    |                          | 2.5640702 | 1.3584358 | 2.5640702 up | chr13:45128276-45128768 (+) // 37.2 // q14.11    |
| 231057_at    |                          | 2.5640683 | 1.3584347 | 2.5640683 up | chr11:95610524-95613020 (-) // 45.5 // q21       |
| 1569852_at   | <i>LSMEM1</i>            | 2.563636  | 1.3581915 | 2.563636 up  | chr7:112120921-112130024 (+) // 78.55 // q31.1   |
| 243847_at    |                          | 2.5630555 | 1.3578647 | 2.5630555 up | chr1:25108530-25108998 (+) // 99.36 // p36.11    |
| 1565788_at   |                          | 2.5625849 | 1.3575999 | 2.5625849 up | chr9:37230799-37233022 (-) // 56.57 // p13.2     |
| 243992_at    |                          | 2.5605223 | 1.3564382 | 2.5605223 up | chr13:20655325-20655784 (+) // 59.67 // q12.11   |
| 1569408_at   | <i>AGO4</i>              | 2.5604734 | 1.3564106 | 2.5604734 up | chr1:36297213-36298878 (+) // 79.34 // p34.3     |
| 1559067_a_at | <i>OTTHUMG0000017</i>    | 2.5604708 | 1.3564091 | 2.5604708 up | chr9:114794836-114795753 (-) // 91.02 // q31.3   |
| 227283_at    | <i>EFR3B</i>             | 2.559991  | 1.3561387 | 2.559991 up  | chr2:25379895-25382004 (+) // 97.64 // p23.3     |

|              |                           |           |           |              |                                                  |
|--------------|---------------------------|-----------|-----------|--------------|--------------------------------------------------|
| 1570061_at   |                           | 2.5559418 | 1.353855  | 2.5559418 up | chr3:128542557-128544443 (+) // 59.85 // q21.3   |
| 237798_at    |                           | 2.5553784 | 1.353537  | 2.5553784 up | chr8:9913262-9913708 (+) // 97.36 // p23.1       |
| 1555068_at   | <i>WNK1</i>               | 2.555304  | 1.353495  | 2.555304 up  | chr12:861893-936663 (+) // 98.55 // p13.33       |
| 218683_at    | <i>PTBP2</i>              | 2.5549319 | 1.3532848 | 2.5549319 up | chr1:97187377-97280346 (+) // 97.09 // p21.3     |
| 215619_at    |                           | 2.5542269 | 1.3528867 | 2.5542269 up | chr1:8565613-8568508 (+) // 41.01 // p36.23      |
| 1569847_at   | <i>CGNL1</i>              | 2.554081  | 1.3528043 | 2.554081 up  | chr15:57690535-57699474 (+) // 43.3 // q21.3     |
| 226482_s_at  | <i>TSTD1</i>              | 2.5523884 | 1.3518479 | 2.5523884 up | chr1:161007420-161008726 (-) // 92.77 // q23.3   |
| 221718_s_at  | <i>AKAP13</i>             | 2.5522084 | 1.3517462 | 2.5522084 up | chr15:86123564-86228105 (+) // 99.34 // q25.3    |
| 233383_at    |                           | 2.5517108 | 1.3514649 | 2.5517108 up | chr3:17505460-17507616 (-) // 52.29 // p24.3     |
| 217250_s_at  | <i>CHD5</i>               | 2.551208  | 1.3511806 | 2.551208 up  | chr1:6165142-6204160 (-) // 96.57 // p36.31      |
| 211348_s_at  | <i>CDC14B</i>             | 2.5509496 | 1.3510344 | 2.5509496 up | chr9:99252522-99382112 (-) // 89.03 // q22.32    |
| 232865_at    | <i>AFF4</i>               | 2.5502841 | 1.350658  | 2.5502841 up | chr5:132227508-132228812 (-) // 80.06 // q31.1   |
| 217005_at    | <i>LDLR</i>               | 2.550002  | 1.3504984 | 2.550002 up  | chr19:11234004-11234270 (-) // 60.64 // p13.2    |
| 217659_at    |                           | 2.5480812 | 1.3494112 | 2.5480812 up | chr10:88198028-88198622 (-) // 53.18 // q23.2    |
| 1560483_at   |                           | 2.5458908 | 1.3481705 | 2.5458908 up | chr7:133374836-133376468 (+) // 42.46 // q33     |
| 1559297_at   | <i>SNX29P2</i>            | 2.5457358 | 1.3480828 | 2.5457358 up | chr16:29223379-29225036 (+) // 54.64 // p11.2    |
| 238224_at    |                           | 2.5455058 | 1.3479524 | 2.5455058 up | chr3:33634154-33634631 (-) // 100.0 // p22.3     |
| 1556153_s_at |                           | 2.543844  | 1.3470103 | 2.543844 up  | chr3:101547087-101547650 (+) // 95.08 // q12.3   |
| 203799_at    | <i>CD302///LY75-CD30:</i> | 2.5433383 | 1.3467234 | 2.5433383 up | chr2:160625363-160639981 (-) // 78.61 // q24.2   |
| 210652_s_at  | <i>TTC39A</i>             | 2.5429251 | 1.346489  | 2.5429251 up | chr1:51752930-51761844 (-) // 91.38 // p32.3     |
| 238079_at    | <i>TPM3</i>               | 2.5420928 | 1.3460166 | 2.5420928 up | chr1:154134041-154134714 (-) // 51.6 // q21.3    |
| 1557538_at   |                           | 2.5415108 | 1.3456864 | 2.5415108 up | chr12:116603092-116605075 (-) // 33.92 // q24.21 |
| 243505_at    | <i>MAP3K3</i>             | 2.5403235 | 1.3450122 | 2.5403235 up | chr17:61750138-61750757 (+) // 59.39 // q23.3    |
| 1568449_at   |                           | 2.5402777 | 1.3449862 | 2.5402777 up | chrX:20189619-20189727 (-) // 88.52 // p22.12    |
| 1556601_a_at | <i>SPATA13</i>            | 2.5393097 | 1.3444364 | 2.5393097 up | chr13:24871761-24876600 (+) // 70.33 // q12.12   |
| 241775_at    |                           | 2.5391047 | 1.3443199 | 2.5391047 up | chr14:31178904-31179538 (+) // 95.82 // q12      |
| 215879_at    | <i>ITGB1</i>              | 2.5377545 | 1.3435525 | 2.5377545 up | chr10:33195872-33197373 (+) // 63.81 // p11.22   |
| 237383_at    |                           | 2.5375369 | 1.3434287 | 2.5375369 up | chr4:87873344-87873819 (+) // 36.85 // q21.3     |
| 239334_at    |                           | 2.536953  | 1.3430967 | 2.536953 up  | chr7:158529938-158530391 (-) // 92.24 // q36.3   |
| 221469_at    | <i>GPR32</i>              | 2.536248  | 1.3426958 | 2.536248 up  | chr19:51273857-51274928 (+) // 100.0 // q13.33   |
| 1559159_at   | <i>CEP68</i>              | 2.5358543 | 1.3424718 | 2.5358543 up | chr2:65297862-65301618 (+) // 94.02 // p14       |
| 221768_at    | <i>LOC100996496///SF:</i> | 2.5357733 | 1.3424258 | 2.5357733 up | chr1:35641981-35645390 (-) // 96.11 // p34.3     |
| 243280_at    |                           | 2.535124  | 1.3420564 | 2.535124 up  | chr10:49561996-49563029 (+) // 51.1 // q11.22    |
| 224565_at    | <i>MIR612///NEAT1</i>     | 2.5343406 | 1.3416104 | 2.5343406 up | chr11:65191943-65194000 (+) // 94.57 // q13.1    |

|              |                           |           |           |              |                                                  |
|--------------|---------------------------|-----------|-----------|--------------|--------------------------------------------------|
| 242529_x_at  |                           | 2.5342686 | 1.3415694 | 2.5342686 up | chr17:44141279-44141547 (-) // 85.51 // q21.31   |
| 1557239_at   | <i>BBX</i>                | 2.5332298 | 1.3409779 | 2.5332298 up | chr3:107378583-107379352 (+) // 70.52 // q13.12  |
| 239331_at    |                           | 2.5327947 | 1.3407302 | 2.5327947 up | chr7:130589534-130590094 (-) // 91.09 // q32.3   |
| 1569864_at   | <i>SERAC1</i>             | 2.5315719 | 1.3400334 | 2.5315719 up | chr6:158566953-158589274 (-) // 48.35 // q25.3   |
| 243480_at    |                           | 2.5313404 | 1.3399016 | 2.5313404 up | chr11:68273211-68273885 (+) // 61.92 // q13.2    |
| 243376_at    | <i>TANK</i>               | 2.5298824 | 1.3390703 | 2.5298824 up | chr2:162018186-162019190 (+) // 30.45 // q24.2   |
| 241954_at    | <i>FDFT1</i>              | 2.5288727 | 1.3384944 | 2.5288727 up | chr8:11692688-11693662 (+) // 69.55 // p23.1     |
| 228032_s_at  | <i>DENND1B</i>            | 2.5283966 | 1.3382227 | 2.5283966 up | chr1:197473880-197475704 (-) // 98.1 // q31.3    |
| 1560460_at   |                           | 2.528011  | 1.3380028 | 2.528011 up  | chr4:174289045-174290966 (-) // 25.05 // q34.1   |
| 243242_at    |                           | 2.528005  | 1.3379992 | 2.528005 up  | chr11:123947044-123947710 (+) // 27.23 // q24.2  |
| 224832_at    | <i>DUSP16</i>             | 2.5278766 | 1.337926  | 2.5278766 up | chr12:12626893-12674374 (-) // 98.74 // p13.2    |
| 240798_at    |                           | 2.5274878 | 1.3377041 | 2.5274878 up | chr7:101678471-101678935 (+) // 13.36 // q22.1   |
| 1559707_at   |                           | 2.5250428 | 1.3363078 | 2.5250428 up | chr3:124965119-124970132 (-) // 55.03 // q21.2   |
| 1555995_a_at |                           | 2.524952  | 1.3362559 | 2.524952 up  |                                                  |
| 1557418_at   | <i>ACSL4</i>              | 2.5249224 | 1.3362391 | 2.5249224 up | chrX:108928339-108930572 (-) // 59.89 // q23     |
| 242498_x_at  |                           | 2.5246937 | 1.3361083 | 2.5246937 up | chr2:153522588-153523055 (-) // 72.38 // q23.3   |
| 241860_at    | <i>LOC100996866</i>       | 2.5240936 | 1.3357654 | 2.5240936 up |                                                  |
| 232705_at    | <i>LRRFIP2</i>            | 2.5217772 | 1.3344408 | 2.5217772 up | chr3:37144007-37145856 (-) // 50.67 // p22.2     |
| 209780_at    | <i>PHTF2</i>              | 2.5203023 | 1.3335968 | 2.5203023 up | chr7:77428217-77586541 (+) // 97.81 // q11.23    |
| 228349_at    | <i>KIAA1958</i>           | 2.5195    | 1.3331375 | 2.5195 up    | chr9:115430902-115431675 (+) // 89.53 // q32     |
| 237180_at    |                           | 2.5193973 | 1.3330786 | 2.5193973 up | chr2:54196840-54197250 (-) // 98.09 // p16.2     |
| 243988_at    |                           | 2.5175297 | 1.3320088 | 2.5175297 up | chr14:76350816-76351212 (+) // 96.59 // q24.3    |
| 243291_at    |                           | 2.5172486 | 1.3318477 | 2.5172486 up | chr3:71286511-71287029 (-) // 73.27 // p13       |
| 220852_at    | <i>FOXN3-AS2</i>          | 2.5163891 | 1.331355  | 2.5163891 up | chr14:90042559-90043818 (+) // 98.13 // q32.11   |
| 243675_at    |                           | 2.5157788 | 1.3310051 | 2.5157788 up | chr4:159795125-159795644 (+) // 14.71 // q32.1   |
| 243839_s_at  |                           | 2.5157044 | 1.3309624 | 2.5157044 up | chr12:111905215-111905950 (+) // 92.11 // q24.12 |
| 1554319_at   | <i>RPS6KA5</i>            | 2.514827  | 1.3304591 | 2.514827 up  | chr14:91360318-91526950 (-) // 95.46 // q32.11   |
| 241155_at    |                           | 2.5145843 | 1.3303199 | 2.5145843 up | chr10:22889135-22889586 (-) // 68.36 // p12.2    |
| 243338_at    | <i>CTB-89H12.4///OTTH</i> | 2.5142505 | 1.3301284 | 2.5142505 up | chr5:148883182-148883632 (-) // 99.78 // q32     |
| 237176_at    |                           | 2.5136662 | 1.3297931 | 2.5136662 up | chr13:46706152-46706581 (-) // 92.65 // q14.13   |
| 210999_s_at  | <i>GRB10</i>              | 2.513592  | 1.3297505 | 2.513592 up  | chr7:50660279-50772998 (-) // 98.91 // p12.1     |
| 237235_at    |                           | 2.512398  | 1.329065  | 2.512398 up  |                                                  |
| 239740_at    | <i>ETV6</i>               | 2.5118139 | 1.3287295 | 2.5118139 up | chr12:11803002-11803415 (+) // 96.03 // p13.2    |
| 238157_at    |                           | 2.5112813 | 1.3284236 | 2.5112813 up | chr18:56342224-56342683 (+) // 75.89 // q21.32   |

|              |                          |           |           |              |                                                                                                                                                                                                                                                                                                             |
|--------------|--------------------------|-----------|-----------|--------------|-------------------------------------------------------------------------------------------------------------------------------------------------------------------------------------------------------------------------------------------------------------------------------------------------------------|
| 238895_at    |                          | 2.5097992 | 1.327572  | 2.5097992 up | chr12:57077796-57078797 (-) // 91.3 // q13.3<br>chr2:110593728-110615488 (+) // 96.11 //<br>q13///chr2:108487493-108509233 (+) // 95.34 //<br>q12.3///chr2:113125739-113147491 (-) // 96.62 //<br>q13///chr2:111271172-111292932 (-) // 96.11 //<br>q13///chr2:107019628-107041389 (-) // 95.43 //<br>q12.2 |
| 212842_x_at  | <i>RGPD3///RGPD4///R</i> | 2.509743  | 1.3275397 | 2.509743 up  | chr7:133697240-133698140 (+) // 14.51 // q33                                                                                                                                                                                                                                                                |
| 216538_at    |                          | 2.5095298 | 1.3274171 | 2.5095298 up | chr10:89706924-89710572 (-) // 26.01 // q23.31                                                                                                                                                                                                                                                              |
| 222176_at    |                          | 2.5081143 | 1.326603  | 2.5081143 up | chr19:8540559-8541444 (-) // 79.35 // p13.2                                                                                                                                                                                                                                                                 |
| 238611_at    |                          | 2.5080128 | 1.3265448 | 2.5080128 up | chr8:56893307-56894149 (-) // 24.68 // q12.1                                                                                                                                                                                                                                                                |
| 243633_at    |                          | 2.5072327 | 1.3260958 | 2.5072327 up | chr9:115381206-115383070 (+) // 90.8 // q32                                                                                                                                                                                                                                                                 |
| 235112_at    |                          | 2.5071328 | 1.3260384 | 2.5071328 up | chr2:98540461-98612006 (+) // 47.75 // q11.2                                                                                                                                                                                                                                                                |
| 221144_at    |                          | 2.506777  | 1.3258337 | 2.506777 up  | chr3:9500512-9501398 (+) // 39.87 // p25.3                                                                                                                                                                                                                                                                  |
| 1557238_s_at |                          | 2.5060651 | 1.325424  | 2.5060651 up | chr6:57012153-57016169 (+) // 85.38 // p11.2                                                                                                                                                                                                                                                                |
| 215012_at    | <i>ZNF451</i>            | 2.5054922 | 1.3250941 | 2.5054922 up | chr1:28586182-28609001 (+) // 99.4 // p35.3                                                                                                                                                                                                                                                                 |
| 223196_s_at  | <i>SESN2</i>             | 2.5049987 | 1.3248098 | 2.5049987 up | chr5:158623254-158623882 (-) // 78.54 // q33.3                                                                                                                                                                                                                                                              |
| 236322_at    |                          | 2.5045223 | 1.3245355 | 2.5045223 up | chr1:168032347-168032816 (-) // 99.15 // q24.2                                                                                                                                                                                                                                                              |
| 241209_at    | <i>DCAF6</i>             | 2.5035493 | 1.3239748 | 2.5035493 up | chr17:66520698-66521433 (+) // 81.76 // q24.2                                                                                                                                                                                                                                                               |
| 242482_at    | <i>PRKAR1A</i>           | 2.502319  | 1.3232658 | 2.502319 up  | chr22:25747311-25758524 (-) // 97.31 // q11.23                                                                                                                                                                                                                                                              |
| 214873_at    | <i>LRP5L</i>             | 2.5022607 | 1.323232  | 2.5022607 up | chr21:11057795-11058326 (-) // 52.19 // p11.1                                                                                                                                                                                                                                                               |
| 207712_at    | <i>BAGE</i>              | 2.5020382 | 1.3231039 | 2.5020382 up | chr2:65221286-65221847 (+) // 83.69 // p14                                                                                                                                                                                                                                                                  |
| 235875_at    |                          | 2.5019207 | 1.3230361 | 2.5019207 up | chr7:138189031-138271154 (+) // 94.35 // q33                                                                                                                                                                                                                                                                |
| 213301_x_at  | <i>TRIM24</i>            | 2.5018158 | 1.3229756 | 2.5018158 up | chr12:93276970-93278265 (-) // 19.03 // q22                                                                                                                                                                                                                                                                 |
| 1560680_at   |                          | 2.5013402 | 1.3227012 | 2.5013402 up | chr2:46804718-46805643 (+) // 31.14 // p21                                                                                                                                                                                                                                                                  |
| 239258_at    |                          | 2.5004294 | 1.3221759 | 2.5004294 up | chr18:55212073-55213244 (-) // 75.91 // q21.31                                                                                                                                                                                                                                                              |
| 229696_at    | <i>FECH</i>              | 2.4983711 | 1.3209878 | 2.4983711 up | chr21:38779817-38780471 (-) // 83.96 // q22.13                                                                                                                                                                                                                                                              |
| 240850_at    |                          | 2.497384  | 1.3204178 | 2.497384 up  | chr7:131155035-131157706 (+) // 86.17 // q32.3                                                                                                                                                                                                                                                              |
| 1560145_at   | <i>MKLN1</i>             | 2.497207  | 1.3203154 | 2.497207 up  | chr8:26221271-26222229 (+) // 99.15 // p21.2                                                                                                                                                                                                                                                                |
| 237636_at    | <i>PPP2R2A</i>           | 2.4967508 | 1.3200519 | 2.4967508 up | chr9:114803062-114904774 (-) // 91.67 // q31.3                                                                                                                                                                                                                                                              |
| 226264_at    | <i>SUSD1</i>             | 2.496634  | 1.3199843 | 2.496634 up  | chr11:33880124-33913836 (-) // 97.57 // p13                                                                                                                                                                                                                                                                 |
| 204249_s_at  | <i>LMO2</i>              | 2.496191  | 1.3197284 | 2.496191 up  | chr5:137272641-137273293 (-) // 99.24 // q31.2                                                                                                                                                                                                                                                              |
| 244847_at    |                          | 2.496108  | 1.3196803 | 2.496108 up  | chr12:111905115-111905581 (-) // 67.97 // q24.12                                                                                                                                                                                                                                                            |
| 238589_s_at  |                          | 2.494795  | 1.3189213 | 2.494795 up  | chr14:50642165-50644188 (-) // 35.72 // q21.3                                                                                                                                                                                                                                                               |
| 233369_at    |                          | 2.4932787 | 1.3180442 | 2.4932787 up |                                                                                                                                                                                                                                                                                                             |

|             |                        |           |           |              |                                                |
|-------------|------------------------|-----------|-----------|--------------|------------------------------------------------|
| 240659_x_at |                        | 2.4907537 | 1.3165823 | 2.4907537 up | chr14:45707331-45707616 (-) // 95.92 // q21.2  |
| 224979_s_at | <i>USP36</i>           | 2.4903088 | 1.3163246 | 2.4903088 up | chr17:76783548-76836980 (-) // 93.44 // q25.3  |
| 1558469_at  | <i>LPP</i>             | 2.4887593 | 1.3154267 | 2.4887593 up | chr3:187870808-188430630 (+) // 70.41 // q27.3 |
| 1566002_at  |                        | 2.488232  | 1.3151209 | 2.488232 up  | chr16:89454712-89456914 (+) // 46.58 // q24.3  |
| 239224_at   | <i>FBXL20</i>          | 2.4877286 | 1.3148291 | 2.4877286 up | chr17:37420143-37420641 (-) // 83.56 // q12    |
| 241924_at   | <i>MECP2</i>           | 2.4875581 | 1.3147303 | 2.4875581 up | chrX:153353204-153353922 (-) // 88.66 // q28   |
|             |                        |           |           |              | chr2:97949666-97957544 (+) // 89.88 //         |
|             |                        |           |           |              | q11.2///chr2:96472799-96480653 (-) // 91.78 // |
|             |                        |           |           |              | q11.1///chr2:98081763-98089625 (-) // 89.43 // |
|             |                        |           |           |              | q11.2                                          |
| 213703_at   | <i>LINC00342</i>       | 2.4865    | 1.3141165 | 2.4865 up    | chr8:38696801-38697636 (+) // 96.67 // p11.22  |
| 242290_at   | <i>TACC1</i>           | 2.4862177 | 1.3139527 | 2.4862177 up | chr21:30923168-30923798 (-) // 25.9 // q21.3   |
| 1559923_at  |                        | 2.4861698 | 1.3139248 | 2.4861698 up | chr16:11799552-11800125 (-) // 99.65 // p13.13 |
| 240118_at   |                        | 2.4843156 | 1.3128484 | 2.4843156 up | chr5:112939525-112940657 (+) // 5.81 // q22.2  |
| 1569764_at  |                        | 2.4836524 | 1.3124633 | 2.4836524 up | chr2:68423971-68425210 (-) // 16.84 // p14     |
| 1565810_at  |                        | 2.4831166 | 1.312152  | 2.4831166 up | chr18:76845133-76846435 (+) // 60.75 // q23    |
| 232824_at   |                        | 2.4823341 | 1.3116974 | 2.4823341 up | chr7:152050594-152051958 (-) // 29.48 // q36.1 |
| 234182_at   |                        | 2.4808912 | 1.3108585 | 2.4808912 up | chr2:191745601-191761294 (+) // 89.2 // q32.2  |
| 211414_at   | <i>GLS</i>             | 2.4801395 | 1.3104212 | 2.4801395 up | chr1:155867604-155868283 (+) // 82.09 // q22   |
| 236223_s_at | <i>RIT1</i>            | 2.4797878 | 1.3102167 | 2.4797878 up | chr13:28783415-28783967 (+) // 25.99 // q12.2  |
| 239745_at   |                        | 2.478745  | 1.3096099 | 2.478745 up  | chr1:21356230-21357688 (-) // 19.0 // p36.12   |
| 216146_at   |                        | 2.4781885 | 1.3092859 | 2.4781885 up | chr3:160981722-160983948 (+) // 56.19 // q26.1 |
| 1556898_at  | <i>LOC200830</i>       | 2.4772003 | 1.3087106 | 2.4772003 up |                                                |
| 1554866_at  | <i>TMEM135</i>         | 2.4769158 | 1.3085449 | 2.4769158 up | chr16:71944551-71944878 (+) // 74.41 // q22.2  |
| 244594_x_at |                        | 2.4759789 | 1.307999  | 2.4759789 up | chr2:197964193-197986168 (-) // 96.48 // q33.1 |
| 235777_at   | <i>ANKRD44</i>         | 2.4735594 | 1.3065885 | 2.4735594 up | chr12:27113207-27113682 (+) // 97.94 // p11.23 |
| 1556282_at  | <i>FGFR1OP2</i>        | 2.4732256 | 1.3063939 | 2.4732256 up | chr2:47401406-47402282 (-) // 81.2 // p21      |
| 229571_at   |                        | 2.472285  | 1.305845  | 2.472285 up  | chr2:225382524-225383007 (-) // 13.46 // q36.2 |
| 237376_at   |                        | 2.4707134 | 1.3049277 | 2.4707134 up | chr1:23410522-23414891 (-) // 84.59 // p36.12  |
| 221832_s_at | <i>LUZP1</i>           | 2.47053   | 1.3048207 | 2.47053 up   | chr4:174118214-174119532 (+) // 34.51 // q34.1 |
| 216756_at   |                        | 2.4701612 | 1.3046052 | 2.4701612 up | chr6:20755064-20755711 (-) // 32.46 // p22.3   |
| 237353_at   |                        | 2.4692867 | 1.3040943 | 2.4692867 up | chr2:238626562-238627647 (+) // 81.42 // q37.3 |
| 238534_at   | <i>LRRFIP1</i>         | 2.4689775 | 1.3039137 | 2.4689775 up | chr16:28603265-28608391 (-) // 90.97 // p11.2  |
| 207122_x_at | <i>SULT1A2</i>         | 2.4687293 | 1.3037686 | 2.4687293 up | chr17:62116508-62117484 (-) // 95.01 // q23.3  |
| 227755_at   | <i>OTTHUMG00000178</i> | 2.4685445 | 1.3036606 | 2.4685445 up |                                                |



|             |                        |           |           |              |                                                  |
|-------------|------------------------|-----------|-----------|--------------|--------------------------------------------------|
| 220740_s_at | <i>SLC12A6</i>         | 2.4680457 | 1.3033692 | 2.4680457 up | chr15:34525665-34610930 (-) // 99.97 // q14      |
| 239283_at   | <i>TMED5</i>           | 2.4676976 | 1.3031656 | 2.4676976 up | chr1:93621097-93621867 (-) // 63.65 // p22.1     |
| 241938_at   | <i>QKI</i>             | 2.4666848 | 1.3025734 | 2.4666848 up | chr6:163837316-163838100 (+) // 98.99 // q26     |
| 215062_at   |                        | 2.4659746 | 1.3021579 | 2.4659746 up | chr2:153343683-153347252 (+) // 79.81 // q23.3   |
| 211553_x_at | <i>APAF1</i>           | 2.4656668 | 1.3019779 | 2.4656668 up | chr12:99042137-99043352 (+) // 99.28 // q23.1    |
| 242287_at   | <i>CLIP1</i>           | 2.4652774 | 1.30175   | 2.4652774 up | chr12:122761673-122762304 (-) // 21.48 // q24.31 |
| 239447_at   | <i>TRA2B</i>           | 2.465112  | 1.3016531 | 2.465112 up  | chr3:185633694-185634131 (-) // 74.16 // q27.2   |
| 236139_at   |                        | 2.4650297 | 1.301605  | 2.4650297 up | chr5:6718591-6719457 (+) // 99.77 // p15.31      |
| 239787_at   | <i>KCTD4</i>           | 2.46489   | 1.3015232 | 2.46489 up   | chr13:45767657-45768026 (-) // 97.62 // q14.12   |
| 244365_at   |                        | 2.4647684 | 1.3014522 | 2.4647684 up | chr16:67144985-67145558 (+) // 68.34 // q22.1    |
| 1563473_at  |                        | 2.463792  | 1.3008806 | 2.463792 up  | chr20:37438655-37444723 (+) // 55.6 // q11.23    |
| 216170_at   |                        | 2.4630067 | 1.3004205 | 2.4630067 up | chr7:132493902-132496104 (-) // 39.55 // q32.3   |
| 1570384_at  | <i>TAS2R19</i>         | 2.462801  | 1.3003    | 2.462801 up  | chr12:11229370-11231770 (-) // 97.93 // p13.2    |
| 215898_at   | <i>TTLL5</i>           | 2.4627721 | 1.3002832 | 2.4627721 up | chr14:76319864-76321505 (+) // 18.35 // q24.3    |
| 233481_at   | <i>OTTHUMG00000175</i> | 2.4626439 | 1.300208  | 2.4626439 up | chr6:22221009-22222618 (+) // 79.38 // p22.3     |
| 1558401_at  |                        | 2.4620304 | 1.2998486 | 2.4620304 up | chr15:72883601-72885265 (+) // 56.37 // q24.1    |
| 240279_at   |                        | 2.4616096 | 1.299602  | 2.4616096 up | chr13:52319420-52319874 (+) // 24.4 // q14.3     |
| 239630_at   |                        | 2.4612195 | 1.2993734 | 2.4612195 up | chr12:11092161-11092736 (-) // 42.05 // p13.2    |
| 1557512_at  |                        | 2.4607055 | 1.299072  | 2.4607055 up | chr12:122824621-122825202 (-) // 50.94 // q24.31 |
| 237239_at   |                        | 2.4605803 | 1.2989986 | 2.4605803 up | chr16:3802469-3802919 (-) // 97.83 // p13.3      |
| 1562957_at  |                        | 2.4602711 | 1.2988173 | 2.4602711 up |                                                  |
| 243874_at   |                        | 2.4599757 | 1.2986441 | 2.4599757 up | chr3:187927400-187927920 (+) // 50.75 // q28     |
| 215500_at   | <i>SNX29</i>           | 2.4594257 | 1.2983215 | 2.4594257 up | chr16:12618554-12621252 (+) // 61.42 // p13.12   |
| 226252_at   |                        | 2.459371  | 1.2982894 | 2.459371 up  | chr3:114050913-114053440 (-) // 94.93 // q13.31  |
| 230494_at   | <i>SLC20A1</i>         | 2.4589665 | 1.2980521 | 2.4589665 up | chr2:113409583-113410242 (+) // 77.54 // q13     |
| 244218_at   |                        | 2.45844   | 1.2977432 | 2.45844 up   | chr7:127644107-127644558 (-) // 98.04 // q32.1   |
| 213262_at   | <i>SACS</i>            | 2.4577985 | 1.2973666 | 2.4577985 up | chr13:23902968-23915840 (-) // 98.8 // q12.12    |
| 242924_at   |                        | 2.4577813 | 1.2973565 | 2.4577813 up | chr22:28296463-28297355 (-) // 99.44 // q12.1    |
| 1558569_at  | <i>LOC100131541</i>    | 2.4562318 | 1.2964468 | 2.4562318 up | chr11:95989054-95992285 (-) // 71.87 // q21      |
| 1564151_at  |                        | 2.4557016 | 1.2961353 | 2.4557016 up | chr13:23794021-23947936 (-) // 52.05 // q12.12   |
| 203650_at   | <i>PROCR</i>           | 2.4554515 | 1.2959883 | 2.4554515 up | chr20:33759933-33765159 (+) // 96.42 // q11.22   |
| 1557626_at  |                        | 2.4551787 | 1.2958281 | 2.4551787 up | chr11:75048927-75051058 (-) // 61.45 // q13.4    |

|             |                          |           |           |              |                                                  |
|-------------|--------------------------|-----------|-----------|--------------|--------------------------------------------------|
| 1570623_at  | <i>OTTHUMG00000175</i>   | 2.4550383 | 1.2957455 | 2.4550383 up |                                                  |
| 202804_at   | <i>ABCC1</i>             | 2.4549184 | 1.295675  | 2.4549184 up | chr16:16043433-16236914 (+) // 97.01 // p13.11   |
| 1560264_at  |                          | 2.4545634 | 1.2954664 | 2.4545634 up | chr4:140652765-140654078 (+) // 75.27 // q31.1   |
| 215221_at   |                          | 2.4537454 | 1.2949855 | 2.4537454 up | chr3:71521603-71524970 (-) // 60.55 // p13       |
| 1570183_at  | <i>FBXO34</i>            | 2.4536266 | 1.2949157 | 2.4536266 up | chr14:55754315-55755746 (+) // 46.61 // q22.3    |
| 215577_at   |                          | 2.4533    | 1.2947236 | 2.4533 up    | chr3:23898915-23900089 (+) // 21.59 // p24.3     |
| 1557386_at  | <i>LOC100507600</i>      | 2.4511132 | 1.2934371 | 2.4511132 up | chr2:136577760-136580659 (+) // 51.31 // q21.3   |
| 243119_at   |                          | 2.4508388 | 1.2932756 | 2.4508388 up | chr17:27619337-27619662 (+) // 96.31 // q11.2    |
| 243763_x_at |                          | 2.4506557 | 1.2931678 | 2.4506557 up | chr3:197425287-197425720 (+) // 58.24 // q29     |
| 232551_at   | <i>SLC26A6</i>           | 2.4486735 | 1.2920004 | 2.4486735 up | chr19:15384645-15385514 (-) // 98.41 // p13.12   |
| 236435_at   |                          | 2.4467807 | 1.2908847 | 2.4467807 up | chr6:87944814-87945286 (+) // 98.09 // q14.3     |
|             |                          |           |           |              | chr1:104198952-104207142 (+) // 100.0 //         |
|             |                          |           |           |              | p21.1///chr1:104293091-104301280 (+) // 100.0 // |
|             |                          |           |           |              | p21.1///chr1:104114238-104168368 (+) // 97.2 //  |
|             |                          |           |           |              | p21.1///chr1:104160076-104262493 (+) // 96.88 // |
|             |                          |           |           |              | p21.1///chr1:104230070-104238261 (-) // 100.0 // |
|             |                          |           |           |              | p21.1                                            |
| 208498_s_at | <i>ACTG1P4///AMY1A//</i> | 2.4467502 | 1.2908669 | 2.4467502 up | chr1:55681079-55683126 (+) // 85.57 // p32.3     |
| 1557566_at  | <i>LOC100507634</i>      | 2.4463508 | 1.2906313 | 2.4463508 up | chr2:26298583-26300846 (+) // 65.17 // p23.3     |
| 232872_at   |                          | 2.4458947 | 1.2903624 | 2.4458947 up | chr1:89187404-89187802 (-) // 98.76 // p22.2     |
| 241271_at   |                          | 2.4456553 | 1.2902211 | 2.4456553 up |                                                  |
| 216444_at   |                          | 2.4456244 | 1.2902029 | 2.4456244 up |                                                  |
| 214984_at   | <i>LOC100271836///LO</i> | 2.445603  | 1.2901902 | 2.445603 up  | chr16:21474416-21495855 (-) // 91.6 // p12.2     |
| 1569499_at  |                          | 2.4452558 | 1.2899853 | 2.4452558 up | chr3:141733172-141734014 (-) // 12.2 // q23      |
| 238279_x_at |                          | 2.444819  | 1.2897277 | 2.444819 up  | chr5:74743612-74743930 (-) // 49.69 // q13.3     |
|             |                          |           |           |              | chr16:22508768-22509319 (+) // 86.96 //          |
|             |                          |           |           |              | p12.2///chr16:22554235-22554783 (+) // 87.32 //  |
|             |                          |           |           |              | p12.2///chr16:19000446-19000995 (+) // 85.69 //  |
|             |                          |           |           |              | p12.3///chr16:30272663-30273214 (-) // 87.14 //  |
|             |                          |           |           |              | p11.2///chr16:29532681-29533232 (-) // 86.96 //  |
|             |                          |           |           |              | p11.2///chr16:21452225-21452776 (-) // 86.78 //  |
|             |                          |           |           |              | p12.2///chr16:29430885-29431436 (-) // 87.14 //  |
|             |                          |           |           |              | p11.2///chr16:21884493-21885040 (-) // 86.05 //  |
|             |                          |           |           |              | p12.2                                            |
| 242114_at   | <i>LOC101060424</i>      | 2.444436  | 1.2895017 | 2.444436 up  | chr18:44388789-44389717 (-) // 67.63 // q21.1    |
| 235107_at   | <i>PIAS2</i>             | 2.444409  | 1.2894857 | 2.444409 up  |                                                  |

|              |                           |           |           |              |                                                 |
|--------------|---------------------------|-----------|-----------|--------------|-------------------------------------------------|
| 241786_at    |                           | 2.4441288 | 1.2893203 | 2.4441288 up | chr2:68408741-68409135 (-) // 57.53 // p14      |
| 242117_at    |                           | 2.443692  | 1.2890625 | 2.443692 up  | chr17:61758010-61758779 (-) // 55.07 // q23.3   |
| 244414_at    |                           | 2.4429855 | 1.2886453 | 2.4429855 up | chr11:96019807-96020266 (-) // 89.63 // q21     |
| 229257_at    | <i>TNRC18</i>             | 2.4425888 | 1.288411  | 2.4425888 up | chr7:5390921-5391351 (-) // 94.71 // p22.1      |
| 1562648_at   | <i>CCDC88A</i>            | 2.442499  | 1.288358  | 2.442499 up  | chr2:55644062-55646087 (-) // 97.62 // p16.1    |
| 239512_at    | <i>SRSF4</i>              | 2.4419167 | 1.2880139 | 2.4419167 up | chr1:29495748-29496417 (-) // 87.39 // p35.3    |
| 202727_s_at  | <i>IFNGR1</i>             | 2.441341  | 1.2876737 | 2.441341 up  | chr6:137518621-137540507 (-) // 99.85 // q23.3  |
| 200911_s_at  | <i>TACC1</i>              | 2.4408967 | 1.2874113 | 2.4408967 up | chr8:38644780-38710545 (+) // 93.97 // p11.22   |
| 244152_at    | <i>IQCJ-SCHIP1-AS1///</i> | 2.4404898 | 1.2871706 | 2.4404898 up | chr3:159483171-159486383 (-) // 92.11 // q25.33 |
| 221831_at    | <i>LUZP1</i>              | 2.4404688 | 1.2871584 | 2.4404688 up | chr1:23410522-23414891 (-) // 84.59 // p36.12   |
| 1558903_at   | <i>LINC00907</i>          | 2.4398828 | 1.2868118 | 2.4398828 up | chr18:39805928-40271387 (+) // 64.0 // q12.3    |
| 1557295_a_at |                           | 2.438885  | 1.2862217 | 2.438885 up  | chr2:36750324-36751847 (+) // 86.71 // p22.2    |
| 235705_at    |                           | 2.4388452 | 1.2861981 | 2.4388452 up | chr5:14429752-14430332 (+) // 55.34 // p15.2    |
| 233690_at    |                           | 2.4384382 | 1.2859575 | 2.4384382 up | chr21:36314141-36317337 (-) // 89.57 // q22.12  |
| 1556238_at   |                           | 2.4375985 | 1.2854605 | 2.4375985 up | chr7:35728667-35730281 (-) // 91.95 // p14.2    |
| 238939_at    | <i>ADD1</i>               | 2.4363568 | 1.2847254 | 2.4363568 up | chr4:2902270-2903527 (+) // 85.82 // p16.3      |
| 214054_at    | <i>DOK2</i>               | 2.4352818 | 1.2840887 | 2.4352818 up | chr8:21766384-21771179 (-) // 98.19 // p21.3    |
| 239814_at    | <i>LOC100506860</i>       | 2.4351642 | 1.2840191 | 2.4351642 up | chr7:130606292-130606704 (+) // 83.57 // q32.3  |
| 1560352_at   | <i>ENTPD1-AS1</i>         | 2.4348164 | 1.283813  | 2.4348164 up |                                                 |
| 239948_at    | <i>NUP153</i>             | 2.4337199 | 1.2831631 | 2.4337199 up | chr6:17645709-17648100 (-) // 82.68 // p22.3    |
| 1566003_x_at |                           | 2.4333215 | 1.2829269 | 2.4333215 up | chr16:89454712-89456914 (+) // 46.58 // q24.3   |
| 1565690_at   |                           | 2.4322984 | 1.2823203 | 2.4322984 up | chr13:50342737-50580123 (+) // 7.29 // q14.2    |
| 239962_at    |                           | 2.4311912 | 1.2816634 | 2.4311912 up |                                                 |
| 237001_at    |                           | 2.4311426 | 1.2816346 | 2.4311426 up | chr8:141155791-141156359 (-) // 95.07 // q24.3  |
| 205223_at    | <i>DEPDC5</i>             | 2.4305265 | 1.2812688 | 2.4305265 up | chr22:32150848-32302997 (+) // 99.3 // q12.2    |
| 230465_at    | <i>HS2ST1</i>             | 2.4298887 | 1.2808902 | 2.4298887 up | chr1:87558255-87564124 (+) // 96.68 // p22.3    |
| 1559229_at   |                           | 2.4283483 | 1.2799754 | 2.4283483 up | chr13:21687578-21714445 (-) // 25.02 // q12.11  |
| 1556663_s_at | <i>LOC100506142</i>       | 2.4281468 | 1.2798557 | 2.4281468 up | chr2:46795397-46796711 (-) // 58.57 // p21      |
| 239614_x_at  |                           | 2.4279628 | 1.2797463 | 2.4279628 up | chr2:191765893-191766366 (+) // 24.9 // q32.2   |
| 213856_at    | <i>CD47</i>               | 2.426974  | 1.2791587 | 2.426974 up  | chr3:107765925-107766764 (-) // 77.68 // q13.12 |
| 1569354_at   |                           | 2.4268267 | 1.2790711 | 2.4268267 up | chr10:18945771-18948167 (-) // 66.94 // p12.31  |
| 1559953_at   | <i>DDX42</i>              | 2.4266198 | 1.2789481 | 2.4266198 up | chr17:61887622-61888628 (+) // 73.59 // q23.3   |
| 1563333_at   |                           | 2.4265864 | 1.2789282 | 2.4265864 up |                                                 |
| 241983_at    | <i>PTPN2</i>              | 2.4264896 | 1.2788707 | 2.4264896 up | chr18:12785655-12786663 (+) // 97.08 // p11.21  |

|             |                     |           |           |              |                                                 |
|-------------|---------------------|-----------|-----------|--------------|-------------------------------------------------|
| 215846_at   |                     | 2.4264653 | 1.2788563 | 2.4264653 up | chr5:130714591-130715791 (+) // 46.69 // q31.1  |
| 1560133_at  |                     | 2.4261994 | 1.2786981 | 2.4261994 up | chr2:233635846-233638620 (+) // 77.12 // q37.1  |
| 240941_at   |                     | 2.425818  | 1.2784712 | 2.425818 up  | chr2:24485223-24485632 (-) // 35.85 // p23.3    |
| 237371_at   |                     | 2.4256203 | 1.2783537 | 2.4256203 up | chr1:1752258-1752730 (-) // 96.52 // p36.33     |
| 223772_s_at | <i>TMEM87A</i>      | 2.4254417 | 1.2782475 | 2.4254417 up | chr15:42550135-42565634 (-) // 55.19 // q15.1   |
| 227539_at   | <i>GNA13</i>        | 2.425088  | 1.2780371 | 2.425088 up  | chr17:63005406-63006367 (-) // 95.53 // q24.1   |
| 212569_at   | <i>SMCHD1</i>       | 2.4241226 | 1.2774626 | 2.4241226 up | chr18:2739473-2805012 (+) // 91.02 // p11.32    |
| 216920_s_at | <i>TARP//TRGC2</i>  | 2.421313  | 1.2757896 | 2.421313 up  | chr7:38279179-38398616 (-) // 99.79 // p14.1    |
|             |                     |           |           |              | chrX:155227245-155240273 (+) // 97.64 //        |
| 208164_s_at | <i>IL9R</i>         | 2.4208975 | 1.275542  | 2.4208975 up | q28//chrY:59330251-59343279 (+) // 97.64 // q12 |
| 233473_x_at |                     | 2.4201431 | 1.2750924 | 2.4201431 up | chr12:62721465-62724366 (+) // 26.08 // q14.1   |
| 230499_at   | <i>BIRC3</i>        | 2.420038  | 1.2750297 | 2.420038 up  | chr11:102209567-102210132 (+) // 77.32 // q22.2 |
| 228934_x_at |                     | 2.4190454 | 1.2744379 | 2.4190454 up |                                                 |
| 241318_at   |                     | 2.418536  | 1.2741339 | 2.418536 up  | chr9:94099266-94099722 (-) // 48.9 // q22.31    |
| 39313_at    | <i>WNK1</i>         | 2.4182203 | 1.2739457 | 2.4182203 up | chr12:989373-1011148 (+) // 91.96 // p13.33     |
| 1564192_at  |                     | 2.416867  | 1.273138  | 2.416867 up  | chr10:29835750-29837842 (-) // 98.82 // p11.23  |
| 1568448_at  |                     | 2.415456  | 1.2722956 | 2.415456 up  | chrX:20189614-20189727 (+) // 92.62 // p22.12   |
| 215191_at   |                     | 2.4153504 | 1.2722325 | 2.4153504 up | chr11:66960506-66962857 (+) // 39.36 // q13.2   |
| 1562414_at  | <i>LOC100509814</i> | 2.4149647 | 1.2720021 | 2.4149647 up | chr10:131306826-131309526 (-) // 88.57 // q26.3 |
| 242297_at   | <i>RREB1</i>        | 2.4148107 | 1.2719101 | 2.4148107 up | chr6:7218030-7218870 (+) // 98.69 // p24.3      |
| 244599_at   |                     | 2.4147666 | 1.2718837 | 2.4147666 up | chr2:182351691-182352393 (+) // 94.43 // q31.3  |
| 242058_at   |                     | 2.4140735 | 1.2714696 | 2.4140735 up | chr4:159770555-159770953 (+) // 91.85 // q32.1  |
| 244650_at   | <i>FAM105A</i>      | 2.4137688 | 1.2712874 | 2.4137688 up | chr5:14611467-14612027 (+) // 48.5 // p15.2     |
| 236872_at   |                     | 2.4118555 | 1.2701435 | 2.4118555 up | chr5:150072851-150073307 (-) // 58.8 // q33.1   |
| 91684_g_at  | <i>EXOSC4</i>       | 2.4117365 | 1.2700722 | 2.4117365 up | chr8:145133638-145134165 (+) // 79.32 // q24.3  |
| 1562137_at  |                     | 2.4116256 | 1.270006  | 2.4116256 up | chr15:58987512-58988215 (-) // 62.06 // q21.3   |
| 243619_at   | <i>FGFR1OP2</i>     | 2.4109426 | 1.2695973 | 2.4109426 up | chr12:27114408-27115052 (+) // 39.81 // p11.23  |
| 215806_x_at | <i>TARP//TRGC2</i>  | 2.410568  | 1.269373  | 2.410568 up  | chr7:38279187-38398583 (-) // 98.94 // p14.1    |
| 233468_at   |                     | 2.410374  | 1.269257  | 2.410374 up  | chr12:62721465-62724366 (-) // 26.08 // q14.1   |
| 237972_at   |                     | 2.4102387 | 1.269176  | 2.4102387 up | chr10:88245284-88245746 (-) // 79.5 // q23.2    |
| 233425_at   |                     | 2.4102252 | 1.2691679 | 2.4102252 up | chr18:60218435-60219738 (+) // 45.85 // q21.33  |
| 233706_at   |                     | 2.4102156 | 1.2691622 | 2.4102156 up | chr20:50037844-50363368 (+) // 70.5 // q13.2    |
| 1563364_at  |                     | 2.4087336 | 1.2682748 | 2.4087336 up |                                                 |
| 239405_at   |                     | 2.4087074 | 1.2682592 | 2.4087074 up | chr3:128457014-128457837 (+) // 75.76 // q21.3  |

|              |                        |           |           |              |                                                  |
|--------------|------------------------|-----------|-----------|--------------|--------------------------------------------------|
| 215611_at    | <i>TCF12</i>           | 2.4079497 | 1.2678052 | 2.4079497 up | chr15:57364370-57366558 (+) // 70.65 // q21.3    |
| 204859_s_at  | <i>APAF1</i>           | 2.4078147 | 1.2677244 | 2.4078147 up | chr12:99039077-99129210 (+) // 88.12 // q23.1    |
| 211474_s_at  | <i>SERPINB6</i>        | 2.4069772 | 1.2672224 | 2.4069772 up | chr1:46744417-46746936 (+) // 54.39 // p34.1     |
| 212222_at    | <i>PSME4</i>           | 2.4067962 | 1.2671139 | 2.4067962 up | chr2:54091205-54197787 (-) // 97.97 // p16.2     |
| 1563031_at   |                        | 2.4064054 | 1.2668798 | 2.4064054 up | chr2:167056147-167108425 (+) // 36.81 // q24.3   |
| 236851_x_at  |                        | 2.4060905 | 1.266691  | 2.4060905 up | chr5:32167905-32168365 (-) // 64.13 // p13.3     |
| 226250_at    |                        | 2.4045277 | 1.2657535 | 2.4045277 up | chr3:114050913-114053440 (-) // 94.93 // q13.31  |
| 220221_at    | <i>VPS13D</i>          | 2.4044306 | 1.2656953 | 2.4044306 up | chr1:12371582-12398045 (+) // 98.5 // p36.22     |
| 229987_at    |                        | 2.4041011 | 1.2654976 | 2.4041011 up | chr13:27646240-27647036 (-) // 94.28 // q12.13   |
| 240031_at    | <i>MSRA</i>            | 2.4039698 | 1.2654188 | 2.4039698 up | chr8:10107944-10108431 (+) // 75.56 // p23.1     |
| 235745_at    | <i>ERN1</i>            | 2.403148  | 1.2649255 | 2.403148 up  | chr17:62206112-62206848 (-) // 98.39 // q23.3    |
| 242306_at    |                        | 2.4029028 | 1.2647783 | 2.4029028 up | chr4:56272748-56273587 (+) // 41.1 // q12        |
| 204864_s_at  | <i>IL6ST</i>           | 2.4023569 | 1.2644504 | 2.4023569 up | chr5:55236836-55290763 (-) // 97.12 // q11.2     |
| 1555836_at   | <i>POLR2B</i>          | 2.4022725 | 1.2643998 | 2.4022725 up | chr4:57895448-57897316 (+) // 67.18 // q12       |
| 1564430_at   |                        | 2.4019647 | 1.2642149 | 2.4019647 up | chr1:171453558-171455327 (-) // 69.35 // q24.3   |
| 225564_at    | <i>SPATA13</i>         | 2.4017363 | 1.2640778 | 2.4017363 up | chr13:24879163-24881207 (+) // 98.79 // q12.12   |
| 226345_at    | <i>ARL5B</i>           | 2.4008596 | 1.263551  | 2.4008596 up | chr10:18967034-18970568 (+) // 96.84 // p12.31   |
| 231412_at    | <i>LOC100506342</i>    | 2.4002645 | 1.2631934 | 2.4002645 up | chr8:90733131-90733552 (-) // 94.17 // q21.3     |
| 231205_at    |                        | 2.4002557 | 1.2631881 | 2.4002557 up | chr8:131329347-131330207 (-) // 73.29 // q24.21  |
| 235811_at    |                        | 2.4002554 | 1.263188  | 2.4002554 up | chr3:152073081-152074025 (+) // 93.29 // q25.1   |
| 216136_at    |                        | 2.4002135 | 1.2631627 | 2.4002135 up | chr1:21356230-21357676 (+) // 19.0 // p36.12     |
| 202085_at    | <i>TJP2</i>            | 2.399638  | 1.2628168 | 2.399638 up  | chr9:71789209-71870118 (+) // 99.58 // q21.11    |
| 234907_x_at  | <i>POLB</i>            | 2.39898   | 1.262421  | 2.39898 up   | chr8:42218611-42218832 (+) // 92.91 // p11.21    |
| 226570_at    | <i>ATP1B3</i>          | 2.3974528 | 1.2615024 | 2.3974528 up | chr3:141595607-141632644 (-) // 99.81 // q23     |
| 1559409_a_at | <i>CC2D2A</i>          | 2.3960497 | 1.2606578 | 2.3960497 up | chr4:15471488-15556789 (+) // 97.96 // p15.32    |
| 1562314_at   |                        | 2.3956523 | 1.2604185 | 2.3956523 up | chr2:24888827-24892233 (+) // 15.59 // p23.3     |
| 230590_at    |                        | 2.394776  | 1.2598908 | 2.394776 up  | chr17:28040486-28040960 (-) // 96.14 // q11.2    |
| 238988_at    |                        | 2.3945043 | 1.259727  | 2.3945043 up | chr20:39701403-39702036 (+) // 91.93 // q12      |
| 1560770_at   | <i>PABPC1</i>          | 2.3934927 | 1.2591174 | 2.3934927 up | chr8:101727579-101730066 (-) // 63.36 // q22.3   |
| 234352_x_at  |                        | 2.3925185 | 1.25853   | 2.3925185 up | chr8:42218611-42218832 (-) // 92.91 // p11.21    |
|              |                        |           |           |              | chr12:110461668-110462215 (+) // 95.71 // q24.11 |
| 238851_at    | <i>ANKRD13A</i>        | 2.3923411 | 1.2584231 | 2.3923411 up |                                                  |
| 1556595_at   | <i>OTTHUMG00000176</i> | 2.3908935 | 1.2575499 | 2.3908935 up | chr16:78930294-78931137 (+) // 25.81 // q23.1    |
| 235412_at    | <i>ARHGEF7</i>         | 2.390449  | 1.2572817 | 2.390449 up  | chr13:111933556-111935021 (-) // 87.1 // q34     |

|              |                 |           |           |              |                                                 |
|--------------|-----------------|-----------|-----------|--------------|-------------------------------------------------|
| 216769_x_at  |                 | 2.3886576 | 1.2562001 | 2.3886576 up | chr9:12798079-12799872 (+) // 73.86 // p23      |
| 240995_at    |                 | 2.3870523 | 1.2552302 | 2.3870523 up | chr19:58136399-58138266 (-) // 58.9 // q13.43   |
| 1560080_at   | <i>DIAPH1</i>   | 2.3867972 | 1.255076  | 2.3867972 up | chr5:140936494-140940612 (-) // 71.93 // q31.3  |
| 1564795_at   |                 | 2.3866308 | 1.2549754 | 2.3866308 up | chr11:3766573-3767499 (+) // 56.42 // p15.4     |
| 233788_at    |                 | 2.3866038 | 1.2549591 | 2.3866038 up | chr2:73696651-73697650 (+) // 24.81 // p13.1    |
| 243791_at    |                 | 2.3864772 | 1.2548826 | 2.3864772 up |                                                 |
| 233683_at    |                 | 2.3862414 | 1.25474   | 2.3862414 up | chr18:33196451-33198554 (+) // 73.63 // q12.2   |
| 237856_at    | <i>RAP1GDS1</i> | 2.3852432 | 1.2541363 | 2.3852432 up | chr4:99317609-99318057 (+) // 98.46 // q23      |
| 1566607_at   |                 | 2.38406   | 1.2534205 | 2.38406 up   | chr6:130507912-130510220 (+) // 53.94 // q23.1  |
| 238408_at    |                 | 2.383813  | 1.253271  | 2.383813 up  | chr8:107749671-107749839 (-) // 60.67 // q23.1  |
| 237554_at    |                 | 2.3834014 | 1.253022  | 2.3834014 up | chr2:158724154-158724628 (-) // 39.05 // q24.1  |
| 238899_at    |                 | 2.3833163 | 1.2529705 | 2.3833163 up | chr17:44203891-44204612 (-) // 96.57 // q21.31  |
| 244805_at    |                 | 2.3820539 | 1.252206  | 2.3820539 up | chr7:51090282-51090981 (-) // 78.54 // p12.1    |
| 234906_at    |                 | 2.3817017 | 1.2519927 | 2.3817017 up | chr1:14707105-14708148 (-) // 4.7 // p36.21     |
| 218096_at    | <i>AGPAT5</i>   | 2.3811278 | 1.2516451 | 2.3811278 up | chr8:6566213-6617184 (+) // 99.01 // p23.1      |
| 241027_at    | <i>OPA1</i>     | 2.3807309 | 1.2514045 | 2.3807309 up | chr3:193380737-193381197 (+) // 98.92 // q29    |
| 236879_at    |                 | 2.380563  | 1.2513028 | 2.380563 up  | chr4:68537169-68537643 (-) // 92.15 // q13.2    |
| 228105_at    |                 | 2.3803291 | 1.2511611 | 2.3803291 up | chr11:68323093-68324003 (+) // 98.59 // q13.2   |
| 1555827_at   | <i>CCNL1</i>    | 2.3796904 | 1.2507739 | 2.3796904 up | chr3:156866055-156877899 (-) // 86.01 // q25.31 |
| 1569091_at   |                 | 2.378801  | 1.2502346 | 2.378801 up  | chr13:20553635-20554892 (+) // 32.58 // q12.11  |
| 212219_at    | <i>PSME4</i>    | 2.3783402 | 1.2499552 | 2.3783402 up | chr2:54091205-54197787 (-) // 97.97 // p16.2    |
| 236930_at    | <i>NUMB</i>     | 2.3782082 | 1.249875  | 2.3782082 up | chr14:73747966-73748418 (-) // 69.07 // q24.2   |
| 1562772_a_at | <i>DAND5</i>    | 2.3777502 | 1.2495972 | 2.3777502 up | chr19:13080320-13085336 (+) // 59.67 // p13.2   |
| 233283_at    |                 | 2.3777082 | 1.2495717 | 2.3777082 up | chr14:65517625-65520344 (-) // 71.94 // q23.3   |
| 1559582_at   | <i>RHOQ</i>     | 2.3776996 | 1.2495664 | 2.3776996 up | chr2:46774705-46777378 (+) // 76.88 // p21      |
| 237968_at    | <i>ATL2</i>     | 2.3766959 | 1.2489573 | 2.3766959 up | chr2:38524188-38524656 (-) // 99.57 // p22.2    |
| 229801_at    | <i>PROSER2</i>  | 2.3764803 | 1.2488265 | 2.3764803 up | chr10:11912029-11912981 (+) // 83.96 // p14     |
| 232610_at    | <i>PARP14</i>   | 2.3763285 | 1.2487342 | 2.3763285 up | chr3:122419372-122441494 (+) // 79.45 // q21.1  |
| 235841_at    |                 | 2.3760927 | 1.2485911 | 2.3760927 up | chr4:141070782-141072308 (-) // 95.24 // q31.1  |
| 239167_at    |                 | 2.375294  | 1.248106  | 2.375294 up  | chr4:87994803-87995470 (+) // 94.59 // q21.3    |
|              |                 |           |           |              | chr2:185113645-185114262 (+) // 51.82 //        |
|              |                 |           |           |              | q32.1///chr8:38070214-38070819 (+) // 54.68 //  |
| 228189_at    | <i>BAG4</i>     | 2.3752167 | 1.2480592 | 2.3752167 up | p11.23                                          |
| 1558745_at   | <i>SNX29</i>    | 2.3742793 | 1.2474897 | 2.3742793 up | chr16:12223553-12621247 (+) // 95.81 // p13.13  |

|              |                        |           |           |              |                                                  |
|--------------|------------------------|-----------|-----------|--------------|--------------------------------------------------|
| 239371_at    |                        | 2.3740633 | 1.2473584 | 2.3740633 up | chr17:80536826-80537613 (+) // 96.21 // q25.3    |
| 215615_x_at  |                        | 2.372876  | 1.2466366 | 2.372876 up  | chr1:8565613-8568508 (-) // 41.01 // p36.23      |
| 232882_at    |                        | 2.3724434 | 1.2463737 | 2.3724434 up | chr13:41170094-41171344 (-) // 37.27 // q14.11   |
| 236495_at    |                        | 2.3714776 | 1.2457863 | 2.3714776 up | chr7:105907192-105907655 (-) // 82.49 // q22.3   |
| 232809_s_at  | <i>FLT1</i>            | 2.3713403 | 1.2457027 | 2.3713403 up | chr13:99155295-99158256 (-) // 99.01 // q32.2    |
| 1563075_s_at |                        | 2.3710053 | 1.2454989 | 2.3710053 up | chr7:138736749-138737554 (-) // 17.05 // q34     |
|              |                        |           |           |              | chr1:147902030-147903295 (-) // 46.04 //         |
|              |                        |           |           |              | q21.2///chr1:143714521-143715786 (-) // 46.04 // |
|              |                        |           |           |              | q21.1                                            |
| 239005_at    |                        | 2.3708007 | 1.2453744 | 2.3708007 up | chr17:60623319-60629850 (+) // 40.02 // q23.2    |
| 232585_at    | <i>TLK2</i>            | 2.3692584 | 1.2444355 | 2.3692584 up | chr9:91065420-91066027 (+) // 98.22 // q22.1     |
| 1556933_at   |                        | 2.3690403 | 1.2443027 | 2.3690403 up | chr8:123823661-123825435 (+) // 36.34 // q24.13  |
| 233121_at    |                        | 2.36812   | 1.2437422 | 2.36812 up   |                                                  |
| 1561591_at   |                        | 2.3667374 | 1.2428997 | 2.3667374 up |                                                  |
| 243587_x_at  |                        | 2.3667104 | 1.2428832 | 2.3667104 up | chr12:118792744-118793067 (-) // 22.53 // q24.23 |
|              |                        |           |           |              | chr1:202488801-202490889 (+) // 77.71 //         |
|              |                        |           |           |              | q32.1///chrY:25561621-25563721 (+) // 72.22 //   |
|              |                        |           |           |              | q11.223///chrY:28399192-28401292 (-) // 72.17 // |
|              |                        |           |           |              | q11.23                                           |
| 233700_at    |                        | 2.36645   | 1.2427244 | 2.36645 up   | chr14:36194277-36194855 (-) // 92.05 // q13.2    |
| 1566269_at   | <i>RALGAPA1</i>        | 2.3646185 | 1.2416074 | 2.3646185 up | chr13:20288693-20293036 (-) // 36.64 // q12.11   |
| 215083_at    |                        | 2.3642962 | 1.2414109 | 2.3642962 up | chr9:74943124-74943546 (+) // 8.41 // q21.13     |
| 239967_at    |                        | 2.364039  | 1.2412539 | 2.364039 up  | chr11:126117310-126117762 (-) // 35.9 // q24.2   |
| 1566295_at   |                        | 2.363932  | 1.2411884 | 2.363932 up  | chr6:86382986-86383798 (-) // 96.96 // q14.3     |
| 239266_at    |                        | 2.3620954 | 1.2400672 | 2.3620954 up | chr12:11247162-11249452 (+) // 36.32 // p13.2    |
| 224033_at    |                        | 2.3616865 | 1.2398174 | 2.3616865 up | chr12:95479318-95531395 (-) // 97.17 // q22      |
| 1555136_at   | <i>FGD6</i>            | 2.3614695 | 1.2396849 | 2.3614695 up | chr16:78902413-78904401 (+) // 77.67 // q23.1    |
| 215526_at    |                        | 2.3610375 | 1.2394209 | 2.3610375 up | chr12:26940855-26942631 (+) // 47.92 // p11.23   |
| 216487_at    |                        | 2.3601542 | 1.2388811 | 2.3601542 up | chr11:68334522-68375494 (+) // 37.57 // q13.2    |
| 232312_at    | <i>PPP6R3</i>          | 2.3600583 | 1.2388225 | 2.3600583 up | chr1:52304418-52305406 (-) // 72.09 // p32.3     |
| 242235_x_at  |                        | 2.3598504 | 1.2386954 | 2.3598504 up | chr16:3997628-4000445 (-) // 33.64 // p13.3      |
| 1569577_x_at | <i>OTTHUMG00000177</i> | 2.3592815 | 1.2383476 | 2.3592815 up | chr7:40104590-40104996 (-) // 18.4 // p14.1      |
| 242693_at    |                        | 2.358421  | 1.2378213 | 2.358421 up  | chr20:50037844-50425208 (-) // 71.64 // q13.2    |
| 233708_at    |                        | 2.3557594 | 1.2361922 | 2.3557594 up | chr2:15636730-15638496 (-) // 33.23 // p24.3     |
| 207478_at    | <i>PRO2958</i>         | 2.3553205 | 1.2359234 | 2.3553205 up | chr10:6245121-6277501 (+) // 96.04 // p15.1      |
| 202464_s_at  | <i>PFKFB3</i>          | 2.3551588 | 1.2358243 | 2.3551588 up |                                                  |

|              |                    |           |           |              |                                                  |
|--------------|--------------------|-----------|-----------|--------------|--------------------------------------------------|
| 236423_at    |                    | 2.3542187 | 1.2352483 | 2.3542187 up |                                                  |
| 242143_at    |                    | 2.3539622 | 1.2350911 | 2.3539622 up | chr6:13695657-13696139 (-) // 70.96 // p23       |
| 202670_at    | MAP2K1             | 2.3532043 | 1.2346265 | 2.3532043 up | chr15:66679288-66784758 (+) // 95.18 // q22.31   |
| 239311_at    |                    | 2.3527367 | 1.23434   | 2.3527367 up | chr2:39079496-39080115 (-) // 43.45 // p22.1     |
| 222409_at    | CORO1C             | 2.3517241 | 1.2337189 | 2.3517241 up | chr12:109038888-109125293 (-) // 98.11 // q24.11 |
| 1562095_at   | SLMAP              | 2.3513246 | 1.2334737 | 2.3513246 up | chr3:57886575-57887670 (+) // 14.15 // p14.3     |
| 1563468_at   |                    | 2.350135  | 1.2327436 | 2.350135 up  | chr2:173961340-173967631 (+) // 72.15 // q31.1   |
| 1559452_a_at |                    | 2.350134  | 1.2327429 | 2.350134 up  | chr8:134574597-134576865 (-) // 39.12 // q24.22  |
| 1561263_at   | C1QTNF3            | 2.3490996 | 1.2321079 | 2.3490996 up | chr5:34040937-34043937 (-) // 95.39 // p13.2     |
| 203615_x_at  | SULT1A1            | 2.3486362 | 1.2318232 | 2.3486362 up | chr16:28616917-28620649 (-) // 75.71 // p11.2    |
| 243108_at    | RANBP9             | 2.3484235 | 1.2316926 | 2.3484235 up | chr6:13634191-13634703 (-) // 97.7 // p23        |
| 210604_at    | GNAT2              | 2.348287  | 1.2316087 | 2.348287 up  | chr1:110145889-110155673 (-) // 98.45 // p13.3   |
| 235860_at    |                    | 2.3481467 | 1.2315226 | 2.3481467 up | chr2:85268906-85269578 (-) // 81.5 // p11.2      |
| 1558044_s_at | EXOSC6             | 2.3481336 | 1.2315145 | 2.3481336 up | chr16:70281198-70430395 (-) // 34.58 // q22.1    |
| 241245_at    | SRSF4              | 2.3476205 | 1.2311993 | 2.3476205 up | chr1:29495927-29496335 (+) // 100.0 // p35.3     |
| 1553736_at   | ZFC3H1             | 2.3472714 | 1.2309847 | 2.3472714 up | chr12:72050125-72057638 (-) // 85.7 // q21.1     |
| 236431_at    | U2SURP             | 2.3466766 | 1.2306191 | 2.3466766 up | chr3:142769978-142770447 (+) // 99.36 // q23     |
| 244679_at    |                    | 2.346091  | 1.230259  | 2.346091 up  | chr6:36470992-36471620 (-) // 60.41 // p21.31    |
| 242171_at    |                    | 2.3451338 | 1.2296702 | 2.3451338 up | chr4:157814503-157814931 (-) // 32.79 // q32.1   |
|              |                    |           |           |              | chr14:103892654-103893231 (+) // 83.93 // q32.32 |
| 239166_at    |                    | 2.3445168 | 1.2292906 | 2.3445168 up |                                                  |
| 237232_at    |                    | 2.3439214 | 1.2289242 | 2.3439214 up |                                                  |
| 232877_at    |                    | 2.343901  | 1.2289116 | 2.343901 up  | chr1:8865927-8868372 (+) // 53.66 // p36.23      |
| 236961_at    |                    | 2.3427913 | 1.2282284 | 2.3427913 up | chr12:7040123-7040572 (+) // 96.77 // p13.31     |
| 240608_at    |                    | 2.3418257 | 1.2276337 | 2.3418257 up | chr3:4410744-4411453 (-) // 80.85 // p26.1       |
| 242166_at    |                    | 2.3414679 | 1.2274132 | 2.3414679 up | chr1:193204075-193204601 (+) // 41.63 // q31.2   |
| 228983_at    | CTD-3195I5.5//OTTI | 2.340788  | 1.2269943 | 2.340788 up  | chr17:3705456-3705920 (-) // 61.22 // p13.2      |
| 210631_at    | NF1                | 2.340431  | 1.2267742 | 2.340431 up  | chr17:29422262-29549782 (+) // 88.25 // q11.2    |
| 243826_at    |                    | 2.339864  | 1.2264247 | 2.339864 up  | chr2:24955169-24955814 (+) // 60.12 // p23.3     |
| 211095_at    | NF1                | 2.3393586 | 1.2261131 | 2.3393586 up | chr17:29421944-29546377 (+) // 90.68 // q11.2    |
| 215375_x_at  | LRRFIP1            | 2.3387609 | 1.2257444 | 2.3387609 up | chr2:238648204-238650486 (+) // 73.57 // q37.3   |
| 243296_at    | NAMPT              | 2.338323  | 1.2254744 | 2.338323 up  | chr7:105909839-105910622 (-) // 15.52 // q22.3   |
| 209723_at    | SERPINB9           | 2.338101  | 1.2253373 | 2.338101 up  | chr6:2887505-2903507 (-) // 57.09 // p25.2       |
| 232704_s_at  | LRRFIP2            | 2.3355985 | 1.2237923 | 2.3355985 up | chr3:37144007-37145856 (-) // 50.67 // p22.2     |



|              |                          |           |           |              |                                                 |
|--------------|--------------------------|-----------|-----------|--------------|-------------------------------------------------|
| 235922_at    |                          | 2.3355165 | 1.2237417 | 2.3355165 up | chr19:16189765-16190538 (+) // 81.0 // p13.12   |
| 238220_at    | <i>KDM6A</i>             | 2.3348897 | 1.2233543 | 2.3348897 up | chrX:44965737-44966232 (+) // 83.0 // p11.3     |
| 244066_at    | <i>DENND4C</i>           | 2.3347836 | 1.2232888 | 2.3347836 up | chr9:19371071-19371761 (-) // 73.27 // p22.1    |
| 241191_at    |                          | 2.334717  | 1.2232476 | 2.334717 up  | chr2:162065405-162065994 (-) // 88.46 // q24.2  |
| 243635_at    |                          | 2.3337219 | 1.2226326 | 2.3337219 up | chr2:183658749-183659191 (+) // 50.1 // q32.1   |
| 1569815_x_at | <i>STRN</i>              | 2.3333435 | 1.2223988 | 2.3333435 up | chr2:37078107-37079655 (-) // 61.64 // p22.2    |
| 1552623_at   | <i>HSH2D</i>             | 2.3330257 | 1.2222022 | 2.3330257 up | chr19:16254474-16269351 (+) // 72.7 // p13.12   |
| 236168_at    |                          | 2.332682  | 1.2219895 | 2.332682 up  | chr2:223792818-223793380 (+) // 56.34 // q36.1  |
| 230233_at    |                          | 2.3324225 | 1.2218292 | 2.3324225 up | chr4:82347555-82348135 (+) // 94.0 // q21.21    |
| 237890_at    |                          | 2.3320394 | 1.2215922 | 2.3320394 up |                                                 |
| 1556923_at   |                          | 2.3308406 | 1.2208503 | 2.3308406 up | chr17:73970239-73972463 (-) // 73.79 // q25.1   |
|              |                          |           |           |              | chr5:68929421-68932390 (+) // 98.89 //          |
|              |                          |           |           |              | q13.2///chr5:69805537-69808500 (+) // 98.52 //  |
|              |                          |           |           |              | q13.2///chr5:68930234-68950423 (+) // 98.15 //  |
|              |                          |           |           |              | q13.2///chr5:69529643-69826541 (+) // 97.59 //  |
|              |                          |           |           |              | q13.2///chr5:34190968-34193922 (+) // 97.55 //  |
|              |                          |           |           |              | p13.2///chr5:70070313-70072463 (-) // 99.12 //  |
|              |                          |           |           |              | q13.2///chr5:69194431-69197397 (-) // 99.12 //  |
|              |                          |           |           |              | q13.2                                           |
| 1558011_at   | <i>LOC100506903///LO</i> | 2.33079   | 1.220819  | 2.33079 up   | chr7:110992424-110994635 (-) // 53.22 // q31.1  |
| 1558410_s_at |                          | 2.3300688 | 1.2203726 | 2.3300688 up | chr2:182783586-182795252 (+) // 97.54 // q31.3  |
| 202506_at    | <i>SSFA2</i>             | 2.328118  | 1.2191643 | 2.328118 up  | chr5:138974165-138975283 (+) // 38.84 // q31.2  |
| 210717_at    |                          | 2.3277926 | 1.2189626 | 2.3277926 up | chr8:38703416-38705639 (+) // 69.77 // p11.22   |
| 1557305_at   | <i>TACC1</i>             | 2.3272562 | 1.2186301 | 2.3272562 up | chr3:114839018-114840336 (+) // 67.94 // q13.31 |
| 224095_at    | <i>LOC100128175</i>      | 2.3268478 | 1.2183769 | 2.3268478 up | chr1:193148175-193155724 (-) // 97.39 // q31.2  |
| 210121_at    | <i>B3GALT2</i>           | 2.32618   | 1.2179627 | 2.32618 up   | chr7:127559251-127560927 (+) // 87.71 // q32.1  |
| 242506_at    |                          | 2.3259704 | 1.2178328 | 2.3259704 up | chr2:109335936-109401296 (+) // 99.32 // q12.3  |
| 201711_x_at  | <i>RANBP2</i>            | 2.3251004 | 1.217293  | 2.3251004 up | chr15:57528567-57529050 (+) // 79.41 // q21.3   |
| 238735_at    |                          | 2.3250446 | 1.2172585 | 2.3250446 up | chr11:78257545-78269610 (+) // 50.0 // q14.1    |
| 1556272_a_at | <i>OTTHUMG00000166</i>   | 2.3250315 | 1.2172502 | 2.3250315 up | chr5:31799355-32111036 (+) // 99.02 // p13.3    |
| 209493_at    | <i>PDZD2</i>             | 2.3250313 | 1.2172501 | 2.3250313 up | chr14:31180188-31180654 (+) // 54.22 // q12     |
| 243525_at    |                          | 2.3232644 | 1.2161534 | 2.3232644 up | chr1:90229103-90235007 (+) // 28.99 // p22.2    |
| 1562712_at   | <i>LRRC8C</i>            | 2.3231406 | 1.2160765 | 2.3231406 up | chr4:56264530-56265040 (+) // 87.63 // q12      |
| 1560622_at   |                          | 2.3226612 | 1.2157787 | 2.3226612 up | chr7:98716661-98717103 (-) // 66.29 // q22.1    |
| 236370_at    |                          | 2.3218222 | 1.2152575 | 2.3218222 up |                                                 |

|              |                           |           |           |              |                                                 |
|--------------|---------------------------|-----------|-----------|--------------|-------------------------------------------------|
| 217259_at    |                           | 2.3217702 | 1.2152252 | 2.3217702 up | chr8:17161327-17162890 (+) // 57.43 // p22      |
| 216294_s_at  | <i>KIAA1109</i>           | 2.3216326 | 1.2151397 | 2.3216326 up | chr4:123260375-123265761 (+) // 92.05 // q27    |
| 216649_at    | <i>RREB1</i>              | 2.3201256 | 1.2142029 | 2.3201256 up | chr6:7231812-7249037 (-) // 99.49 // p24.3      |
| 227805_at    | <i>METAP1D</i>            | 2.3198256 | 1.2140164 | 2.3198256 up | chr2:172946382-172947158 (+) // 98.48 // q31.1  |
| 241855_s_at  |                           | 2.3191638 | 1.2136047 | 2.3191638 up |                                                 |
| 238348_x_at  |                           | 2.319155  | 1.2135992 | 2.319155 up  | chr20:5550887-5551136 (+) // 90.08 // p12.3     |
| 1558877_at   |                           | 2.3178656 | 1.2127969 | 2.3178656 up | chr4:140069821-140072680 (-) // 9.71 // q31.1   |
| 238151_at    |                           | 2.3173356 | 1.212467  | 2.3173356 up |                                                 |
| 230933_at    | <i>DSTN</i>               | 2.3171744 | 1.2123667 | 2.3171744 up | chr20:17590144-17590564 (+) // 84.56 // p12.1   |
| 210530_s_at  | <i>NR2C1</i>              | 2.3152926 | 1.2111945 | 2.3152926 up | chr12:95424198-95467269 (-) // 96.45 // q22     |
| 232827_at    |                           | 2.3149552 | 1.2109843 | 2.3149552 up | chr6:33599583-33600277 (-) // 15.46 // p21.31   |
| 215183_at    |                           | 2.314786  | 1.2108788 | 2.314786 up  | chr13:20260858-20262963 (+) // 76.42 // q12.11  |
| 210102_at    | <i>VWA5A</i>              | 2.3142397 | 1.2105384 | 2.3142397 up | chr11:123986133-123995542 (+) // 84.93 // q24.2 |
| 1563076_x_at |                           | 2.3140824 | 1.2104402 | 2.3140824 up | chr7:138736749-138737554 (-) // 17.05 // q34    |
| 214541_s_at  | <i>QKI</i>                | 2.3128064 | 1.2096446 | 2.3128064 up | chr6:163836206-163985968 (+) // 92.57 // q26    |
| 1557571_at   | <i>VPS13D</i>             | 2.3099935 | 1.2078887 | 2.3099935 up | chr1:12422338-12424007 (+) // 75.56 // p36.22   |
| 240452_at    | <i>GSPT1</i>              | 2.308475  | 1.20694   | 2.308475 up  | chr16:11980878-11981368 (-) // 98.2 // p13.13   |
| 237725_x_at  | <i>SMC5</i>               | 2.3082652 | 1.2068089 | 2.3082652 up | chr9:72959103-72959590 (+) // 88.71 // q21.12   |
| 234064_at    | <i>CTC-507E2.1///OTTF</i> | 2.3067868 | 1.2058847 | 2.3067868 up | chr17:34006424-34011922 (-) // 52.93 // q12     |
|              |                           |           |           |              | chr9:97109905-97110721 (+) // 99.14 //          |
|              |                           |           |           |              | q22.32///chr9:99671481-99672297 (-) // 99.27 // |
|              |                           |           |           |              | q22.33                                          |
| 239321_at    | <i>LOC441454</i>          | 2.3065205 | 1.2057182 | 2.3065205 up | chr3:107378583-107379352 (+) // 70.52 // q13.12 |
| 1557240_a_at |                           | 2.3056176 | 1.2051532 | 2.3056176 up | chr7:101480047-101481108 (+) // 56.5 // q22.1   |
| 1566243_at   |                           | 2.30388   | 1.2040656 | 2.30388 up   | chr2:37078107-37079655 (-) // 61.64 // p22.2    |
| 1569813_at   | <i>STRN</i>               | 2.3037314 | 1.2039726 | 2.3037314 up | chrX:3522412-3631649 (-) // 82.9 // p22.33      |
| 204060_s_at  | <i>PRKX///PRKY</i>        | 2.3037028 | 1.2039547 | 2.3037028 up | chr1:160955505-160955966 (-) // 20.99 // q23.3  |
| 242978_x_at  |                           | 2.3026662 | 1.2033052 | 2.3026662 up | chr2:36770845-36771287 (-) // 97.79 // p22.2    |
| 242803_at    |                           | 2.3024971 | 1.2031994 | 2.3024971 up | chr2:98521792-98522742 (-) // 31.35 // q11.2    |
| 1570264_at   |                           | 2.3015447 | 1.2026025 | 2.3015447 up | chr2:170478003-170478450 (+) // 38.28 // q31.1  |
| 222375_at    |                           | 2.3014956 | 1.2025716 | 2.3014956 up | chr2:242393599-242394167 (+) // 94.34 // q37.3  |
| 230768_at    |                           | 2.3014262 | 1.2025281 | 2.3014262 up | chr13:98009735-98011539 (+) // 87.4 // q32.1    |
| 232138_at    | <i>MBNL2</i>              | 2.300616  | 1.2020202 | 2.300616 up  | chr6:2887602-2888080 (+) // 21.82 // p25.2      |
| 1563357_at   |                           | 2.3005016 | 1.2019484 | 2.3005016 up | chr2:152347602-152349810 (-) // 91.54 // q23.3  |
| 215368_at    | <i>NEB</i>                | 2.3004284 | 1.2019025 | 2.3004284 up |                                                 |

|              |                           |           |           |              |                                                  |
|--------------|---------------------------|-----------|-----------|--------------|--------------------------------------------------|
| 1561161_at   |                           | 2.2989705 | 1.2009879 | 2.2989705 up | chr1:41596240-41596667 (-) // 9.15 // p34.2      |
| 239048_at    |                           | 2.2989497 | 1.200975  | 2.2989497 up | chr1:10418336-10419623 (+) // 87.09 // p36.22    |
| 225524_at    | <i>ANTXR2</i>             | 2.2987416 | 1.2008443 | 2.2987416 up | chr4:80826724-80905126 (-) // 93.94 // q21.21    |
| 216190_x_at  | <i>ITGB1</i>              | 2.2981586 | 1.2004784 | 2.2981586 up | chr10:33190474-33197373 (+) // 90.44 // p11.22   |
| 1561540_at   | <i>LINC00343</i>          | 2.2980561 | 1.2004141 | 2.2980561 up | chr13:106359217-106414145 (+) // 65.13 // q33.2  |
|              |                           |           |           |              | chr9:97091829-97092178 (+) // 78.57 //           |
|              |                           |           |           |              | q22.32///chr9:99690033-99690382 (-) // 78.57 //  |
| 242811_x_at  |                           | 2.297452  | 1.2000347 | 2.297452 up  | q22.33                                           |
| 206052_s_at  | <i>SLBP</i>               | 2.2968383 | 1.1996493 | 2.2968383 up | chr4:1694526-1714030 (-) // 93.34 // p16.3       |
| 1554121_at   | <i>HSD17B12</i>           | 2.2964723 | 1.1994194 | 2.2964723 up | chr11:43702264-43776952 (+) // 39.96 // p11.2    |
| 1560353_at   |                           | 2.2948434 | 1.1983957 | 2.2948434 up | chr3:71494855-71497787 (-) // 74.66 // p13       |
|              |                           |           |           |              | chr5:177316931-177319560 (+) // 59.57 //         |
|              |                           |           |           |              | q35.3///chr5:175378230-175380858 (-) // 59.12 // |
| 232834_at    |                           | 2.29458   | 1.1982301 | 2.29458 up   | q35.2                                            |
| 1562969_at   | <i>DNMBP</i>              | 2.2930112 | 1.1972435 | 2.2930112 up | chr10:101689481-101690656 (-) // 95.96 // q24.2  |
| 237708_at    |                           | 2.2922122 | 1.1967406 | 2.2922122 up | chrX:19734669-19735022 (-) // 54.96 // p22.12    |
| 227991_x_at  | <i>ZBTB43</i>             | 2.2920797 | 1.1966572 | 2.2920797 up | chr9:129599548-129600489 (+) // 96.64 // q33.3   |
| 243593_s_at  |                           | 2.2916772 | 1.1964039 | 2.2916772 up | chr19:8540988-8541443 (+) // 88.08 // p13.2      |
| 241923_x_at  | <i>NANS</i>               | 2.2911992 | 1.1961029 | 2.2911992 up | chr9:100839669-100840051 (-) // 13.18 // q22.33  |
| 1561364_at   |                           | 2.290677  | 1.1957741 | 2.290677 up  | chr10:97868293-97870095 (-) // 13.99 // q24.1    |
| 224097_s_at  | <i>F11R</i>               | 2.2905748 | 1.1957097 | 2.2905748 up | chr1:160967605-161008711 (-) // 91.08 // q23.3   |
| 244376_at    | <i>METTL7A</i>            | 2.2903564 | 1.1955721 | 2.2903564 up | chr12:51317830-51318312 (+) // 21.63 // q13.12   |
| 243514_at    |                           | 2.2899506 | 1.1953164 | 2.2899506 up | chr13:52327487-52328228 (+) // 57.01 // q14.3    |
| 217226_s_at  | <i>SFXN3</i>              | 2.2887654 | 1.1945696 | 2.2887654 up | chr1:170633413-170705649 (+) // 75.02 // q24.2   |
| 219925_at    | <i>ZMYM6</i>              | 2.2885003 | 1.1944025 | 2.2885003 up | chr1:35449391-35496314 (-) // 99.16 // p34.3     |
| 1558600_a_at | <i>CTB-58E17.7///OTTH</i> | 2.2878287 | 1.193979  | 2.2878287 up | chr17:36952429-36954624 (-) // 88.71 // q12      |
| 211385_x_at  | <i>SULT1A2</i>            | 2.2877905 | 1.193955  | 2.2877905 up | chr16:28603264-28608386 (-) // 99.62 // p11.2    |
| 233314_at    |                           | 2.287218  | 1.193594  | 2.287218 up  | chr10:89706924-89710572 (+) // 26.01 // q23.31   |
| 237879_at    |                           | 2.2865462 | 1.1931701 | 2.2865462 up | chr2:197951900-197952349 (+) // 100.0 // q33.1   |
| 216051_x_at  |                           | 2.2852433 | 1.1923478 | 2.2852433 up | chr10:24536053-24544975 (-) // 72.62 // p12.2    |
| 240751_at    |                           | 2.2845318 | 1.1918986 | 2.2845318 up | chr15:50754710-50755148 (+) // 49.44 // q21.2    |
| 1557772_at   |                           | 2.2839363 | 1.1915224 | 2.2839363 up | chr7:133446299-133447624 (+) // 58.93 // q33     |
| 1553349_at   | <i>ARID2</i>              | 2.2838962 | 1.1914971 | 2.2838962 up | chr12:46230727-46235821 (+) // 78.58 // q12      |
| 244859_at    |                           | 2.2832546 | 1.1910918 | 2.2832546 up | chr1:145030495-145030845 (-) // 93.01 // q21.1   |

|              |                        |           |           |              |                                                 |
|--------------|------------------------|-----------|-----------|--------------|-------------------------------------------------|
| 241641_at    |                        | 2.282442  | 1.1905782 | 2.282442 up  | chr2:24466376-24467014 (-) // 27.87 // p23.3    |
| 234174_at    |                        | 2.2821698 | 1.1904061 | 2.2821698 up | chr2:198093722-198095295 (+) // 71.91 // q33.1  |
| 216121_at    |                        | 2.2814806 | 1.1899704 | 2.2814806 up | chr2:20469816-20471983 (-) // 66.26 // p24.1    |
| 230688_at    |                        | 2.2814054 | 1.1899228 | 2.2814054 up | chr13:97979261-97979834 (+) // 83.56 // q32.1   |
| 223771_at    | <i>TMEM87A</i>         | 2.2809858 | 1.1896574 | 2.2809858 up | chr15:42548149-42565664 (-) // 43.3 // q15.1    |
| 1568722_at   | <i>OTTHUMG00000171</i> | 2.28098   | 1.1896539 | 2.28098 up   | chr14:91108983-91115230 (+) // 76.24 // q32.11  |
| 215995_x_at  |                        | 2.2789133 | 1.188346  | 2.2789133 up | chr15:65197536-65200230 (+) // 53.82 // q22.31  |
| 241905_at    | <i>PIK3C2A</i>         | 2.2785206 | 1.1880974 | 2.2785206 up | chr11:17146020-17146826 (-) // 36.11 // p15.1   |
| 241118_at    | <i>LINC00462</i>       | 2.2783754 | 1.1880054 | 2.2783754 up | chr13:49151109-49151678 (-) // 75.96 // q14.2   |
| 1553599_a_at | <i>SYCP3</i>           | 2.2782826 | 1.1879468 | 2.2782826 up | chr12:102122427-102133240 (-) // 96.78 // q23.2 |
| 211435_at    |                        | 2.2756376 | 1.1862708 | 2.2756376 up |                                                 |
| 233808_at    |                        | 2.275436  | 1.1861429 | 2.275436 up  | chr8:99681236-99684293 (-) // 44.99 // q22.2    |
| 232597_x_at  | <i>SCAF11</i>          | 2.27539   | 1.1861138 | 2.27539 up   | chr12:46348538-46350434 (-) // 77.58 // q12     |
| 242448_at    |                        | 2.2742746 | 1.1854064 | 2.2742746 up | chr2:39496611-39497084 (-) // 57.47 // p22.1    |
| 202530_at    | <i>MAPK14</i>          | 2.27425   | 1.1853908 | 2.27425 up   | chr6:35995572-36078535 (+) // 98.64 // p21.31   |
| 220264_s_at  | <i>GPR107</i>          | 2.273812  | 1.185113  | 2.273812 up  | chr9:132816199-132870596 (+) // 98.38 // q34.11 |
| 237733_at    |                        | 2.2735445 | 1.1849432 | 2.2735445 up | chr13:42359600-42360069 (-) // 98.74 // q14.11  |
| 1566777_at   |                        | 2.2728906 | 1.1845282 | 2.2728906 up | chr14:31414308-31416200 (-) // 23.15 // q12     |
| 239811_at    |                        | 2.272167  | 1.1840689 | 2.272167 up  | chr7:105027749-105028342 (-) // 93.84 // q22.3  |
| 241293_x_at  |                        | 2.2715814 | 1.183697  | 2.2715814 up | chr14:78012782-78013108 (+) // 60.36 // q24.3   |
| 240665_at    |                        | 2.271346  | 1.1835475 | 2.271346 up  | chr10:11284961-11285322 (+) // 93.92 // p14     |
| 238954_at    |                        | 2.2702534 | 1.1828533 | 2.2702534 up | chrX:73484537-73485152 (-) // 69.19 // q13.2    |
| 239428_at    |                        | 2.2700627 | 1.1827321 | 2.2700627 up | chr2:65356290-65356855 (-) // 98.6 // p14       |
| 1554966_a_at | <i>FILIP1L</i>         | 2.2693298 | 1.1822662 | 2.2693298 up | chr3:99551987-99833357 (-) // 98.8 // q12.1     |
| 238108_at    |                        | 2.269277  | 1.1822329 | 2.269277 up  | chr8:9529703-9530172 (+) // 38.96 // p23.1      |
| 236703_at    | <i>NT5C2</i>           | 2.2691965 | 1.1821816 | 2.2691965 up | chr10:104846929-104847399 (-) // 96.3 // q24.32 |
| 204093_at    | <i>CCNH</i>            | 2.268452  | 1.1817081 | 2.268452 up  | chr5:86690091-86708671 (-) // 100.0 // q14.3    |
| 226691_at    | <i>TNRC18</i>          | 2.2682226 | 1.1815622 | 2.2682226 up | chr7:5346425-5360822 (-) // 93.72 // p22.1      |
| 242886_at    |                        | 2.2674687 | 1.1810826 | 2.2674687 up | chr17:27105537-27106197 (-) // 31.04 // q11.2   |
|              |                        |           |           |              | chr17:29062204-29062638 (+) // 35.25 //         |
|              |                        |           |           |              | q11.2//chr17:30267598-30268032 (+) // 34.33 //  |
|              |                        |           |           |              | q11.2                                           |
| 217704_x_at  |                        | 2.267018  | 1.1807959 | 2.267018 up  | chr9:132816199-132870596 (+) // 98.38 // q34.11 |
| 220265_at    | <i>GPR107</i>          | 2.2668443 | 1.1806853 | 2.2668443 up |                                                 |
| 239875_at    | <i>NAB1</i>            | 2.266178  | 1.1802611 | 2.266178 up  | chr2:191514235-191514859 (-) // 99.52 // q32.2  |

|              |                  |           |           |              |                                                 |
|--------------|------------------|-----------|-----------|--------------|-------------------------------------------------|
| 1556239_a_at |                  | 2.2648573 | 1.1794201 | 2.2648573 up | chr7:35728667-35730281 (-) // 91.95 // p14.2    |
| 244236_at    |                  | 2.2643688 | 1.179109  | 2.2643688 up | chr17:27113169-27113802 (-) // 100.0 // q11.2   |
| 203544_s_at  | STAM             | 2.2622392 | 1.1777515 | 2.2622392 up | chr10:17686296-17757907 (+) // 98.68 // p12.33  |
| 224322_at    | ARID4B           | 2.2622366 | 1.1777499 | 2.2622366 up | chr1:235343474-235397808 (-) // 84.54 // q42.3  |
| 239757_at    | ZFAND6           | 2.2619336 | 1.1775565 | 2.2619336 up | chr15:80358166-80358661 (+) // 33.93 // q25.1   |
| 236962_at    |                  | 2.261167  | 1.1770675 | 2.261167 up  | chr1:97251054-97251689 (+) // 88.98 // p21.3    |
| 205765_at    | CYP3A5           | 2.260944  | 1.1769252 | 2.260944 up  | chr7:99245816-99277606 (-) // 99.94 // q22.1    |
| 218814_s_at  | TMEM206          | 2.2600765 | 1.1763716 | 2.2600765 up | chr1:212537272-212588237 (-) // 98.18 // q32.3  |
| 209648_x_at  | SOCS5            | 2.2592797 | 1.1758629 | 2.2592797 up | chr2:46926098-46989804 (+) // 99.22 // p21      |
| 222186_at    |                  | 2.2591722 | 1.1757942 | 2.2591722 up | chr15:80424120-80424976 (+) // 14.39 // q25.1   |
| 242076_at    |                  | 2.258852  | 1.1755898 | 2.258852 up  | chr9:37234136-37234917 (+) // 54.13 // p13.2    |
| 244220_at    |                  | 2.2586296 | 1.1754477 | 2.2586296 up | chr5:157220236-157220670 (-) // 97.97 // q33.3  |
| 204435_at    | NUPL1            | 2.2579064 | 1.1749856 | 2.2579064 up | chr13:25875768-25910478 (+) // 98.22 // q12.13  |
| 1553917_at   | PIKFYVE          | 2.2562346 | 1.173917  | 2.2562346 up | chr2:209130990-209170269 (+) // 92.3 // q34     |
| 241008_at    |                  | 2.2561402 | 1.1738567 | 2.2561402 up | chr3:37900749-37901259 (-) // 98.65 // p22.2    |
| 239759_at    |                  | 2.255912  | 1.1737108 | 2.255912 up  | chr1:150545017-150546236 (+) // 84.31 // q21.3  |
| 232371_at    | 7.Mar            | 2.255571  | 1.1734927 | 2.255571 up  | chr2:160589470-160591328 (+) // 65.25 // q24.2  |
| 200677_at    | PTTG1IP          | 2.255116  | 1.1732016 | 2.255116 up  | chr21:46269512-46293741 (-) // 99.85 // q22.3   |
| 212588_at    | PTPRC            | 2.2534816 | 1.1721556 | 2.2534816 up | chr1:198608224-198726603 (+) // 97.09 // q31.3  |
| 233348_at    |                  | 2.2526484 | 1.1716222 | 2.2526484 up | chr6:159032050-159033237 (+) // 30.84 // q25.3  |
| 203116_s_at  | FECH             | 2.2524855 | 1.1715178 | 2.2524855 up | chr18:55216803-55254057 (-) // 99.59 // q21.31  |
| 1566271_x_at | RALGAPA1         | 2.2524617 | 1.1715026 | 2.2524617 up | chr14:36194277-36194855 (-) // 92.05 // q13.2   |
| 243546_at    |                  | 2.2512214 | 1.170708  | 2.2512214 up | chr11:94929634-94930357 (-) // 58.86 // q21     |
| 1556743_at   | OTTHUMG0000015   | 2.2510004 | 1.1705663 | 2.2510004 up | chr3:88177246-88178471 (+) // 85.39 // p11.1    |
| 241639_at    |                  | 2.2506936 | 1.1703696 | 2.2506936 up | chr16:72644282-72644638 (-) // 57.94 // q22.2   |
| 209682_at    | CBLB             | 2.2505188 | 1.1702576 | 2.2505188 up | chr3:105377114-105587887 (-) // 99.57 // q13.11 |
| 1557419_a_at | ACSL4            | 2.249082  | 1.1693363 | 2.249082 up  | chrX:108928339-108930572 (-) // 59.89 // q23    |
| 1562948_at   |                  | 2.2490563 | 1.1693199 | 2.2490563 up |                                                 |
| 1554122_a_at | HSD17B12         | 2.2489538 | 1.1692541 | 2.2489538 up | chr11:43702264-43776952 (+) // 39.96 // p11.2   |
| 229455_at    | AC083843.1//OTTH | 2.2483163 | 1.168845  | 2.2483163 up | chr8:135804260-135805394 (-) // 80.23 // q24.22 |
| 243509_at    |                  | 2.2481349 | 1.1687286 | 2.2481349 up | chr12:92517824-92518470 (-) // 64.97 // q21.33  |
| 226758_at    | LUC7L2           | 2.2478821 | 1.1685663 | 2.2478821 up | chr7:139103714-139104741 (+) // 82.04 // q34    |
| 243877_at    | LOC100996636     | 2.247294  | 1.1681888 | 2.247294 up  | chr1:185105508-185105968 (-) // 31.54 // q25.3  |
| 240866_at    |                  | 2.2472124 | 1.1681365 | 2.2472124 up | chr3:188496457-188496911 (+) // 93.71 // q28    |

|             |                   |           |           |              |                                                                                                                                                                                                        |
|-------------|-------------------|-----------|-----------|--------------|--------------------------------------------------------------------------------------------------------------------------------------------------------------------------------------------------------|
| 227917_at   | LOC100506990      | 2.2470875 | 1.1680562 | 2.2470875 up |                                                                                                                                                                                                        |
| 241445_at   |                   | 2.246783  | 1.1678609 | 2.246783 up  | chr2:112836269-112836780 (+) // 47.98 // q13<br>chr15:30893988-30894510 (+) // 79.62 //<br>q13.2///chr15:30425010-30425532 (+) // 79.62 //<br>q13.2///chr15:32697217-32697740 (-) // 79.42 //<br>q13.3 |
| 243356_at   |                   | 2.2461128 | 1.1674304 | 2.2461128 up | chr5:56154439-56154892 (+) // 96.54 // q11.2                                                                                                                                                           |
| 243030_at   |                   | 2.2460966 | 1.1674199 | 2.2460966 up | chr6:33588140-33588684 (+) // 62.35 // p21.31                                                                                                                                                          |
| 239542_at   | ITPR3///LOC101060 | 2.2458382 | 1.167254  | 2.2458382 up | chr3:31687797-31688290 (-) // 24.58 // p23                                                                                                                                                             |
| 239292_at   |                   | 2.2452762 | 1.166893  | 2.2452762 up | chr12:42616575-42617247 (-) // 65.17 // q12                                                                                                                                                            |
| 243561_at   |                   | 2.2451272 | 1.1667972 | 2.2451272 up | chr2:223792349-223792817 (+) // 98.73 // q36.1                                                                                                                                                         |
| 242726_at   |                   | 2.2450545 | 1.1667504 | 2.2450545 up | chr18:55377244-55395934 (-) // 74.97 // q21.31                                                                                                                                                         |
| 234095_at   |                   | 2.2426739 | 1.1652198 | 2.2426739 up | chr20:5550887-5551136 (-) // 90.08 // p12.3                                                                                                                                                            |
| 238343_x_at | OTTHUMG0000015    | 2.241907  | 1.1647264 | 2.241907 up  | chr2:28530559-28533322 (-) // 54.96 // p23.2                                                                                                                                                           |
| 1561370_at  | LOC100505716      | 2.2397425 | 1.1633328 | 2.2397425 up | chr10:102792168-102800997 (+) // 87.71 //<br>q24.31                                                                                                                                                    |
| 220974_x_at | SFXN3             | 2.2378428 | 1.1621087 | 2.2378428 up | chr17:25621790-25622614 (+) // 97.15 // q11.1                                                                                                                                                          |
| 231055_at   |                   | 2.2372808 | 1.1617464 | 2.2372808 up | chr7:126989875-126990331 (-) // 56.24 // q31.33                                                                                                                                                        |
| 227501_at   |                   | 2.2361073 | 1.1609895 | 2.2361073 up | chr11:111473612-111477674 (+) // 82.38 // q23.1                                                                                                                                                        |
| 240066_at   | AC000123.3///OTTH | 2.2359622 | 1.1608957 | 2.2359622 up | chr7:143050493-143056850 (-) // 99.98 // q34                                                                                                                                                           |
| 1557459_at  |                   | 2.2354617 | 1.1605729 | 2.2354617 up | chr4:106164725-106200958 (+) // 95.21 // q24                                                                                                                                                           |
| 205368_at   | FAM131B           | 2.2354236 | 1.1605482 | 2.2354236 up | chr15:64082991-64083377 (-) // 97.46 // q22.31                                                                                                                                                         |
| 227624_at   | TET2              | 2.2352076 | 1.1604087 | 2.2352076 up | chr18:67833669-67873181 (-) // 99.88 // q22.2                                                                                                                                                          |
| 237632_at   |                   | 2.2346194 | 1.1600292 | 2.2346194 up | chr15:73907511-73907966 (-) // 86.37 // q24.1                                                                                                                                                          |
| 1553277_at  | RTTN              | 2.2339807 | 1.1596167 | 2.2339807 up | chr9:131355046-131361964 (+) // 79.52 // q34.11                                                                                                                                                        |
| 242865_at   |                   | 2.2335107 | 1.1593132 | 2.2335107 up | chr1:33396457-33397479 (-) // 18.86 // p35.1                                                                                                                                                           |
| 214925_s_at | SPTAN1            | 2.2334616 | 1.1592815 | 2.2334616 up | chr7:156996691-156997092 (+) // 29.88 // q36.3                                                                                                                                                         |
| 1556332_at  |                   | 2.2333994 | 1.1592412 | 2.2333994 up | chr4:99850470-99851189 (-) // 88.96 // q23                                                                                                                                                             |
| 242673_at   |                   | 2.2326555 | 1.1587607 | 2.2326555 up | chr4:47916243-47961158 (+) // 35.15 // p12                                                                                                                                                             |
| 237718_at   | EIF4E             | 2.2324133 | 1.1586041 | 2.2324133 up | chr7:107574256-107575254 (-) // 95.19 // q31.1                                                                                                                                                         |
| 1562792_at  | NIPAL1            | 2.2322311 | 1.1584864 | 2.2322311 up | chr2:238875684-238951236 (+) // 92.51 // q37.3                                                                                                                                                         |
| 238608_at   |                   | 2.231962  | 1.1583124 | 2.231962 up  | chr15:80384166-80384668 (+) // 52.15 // q25.1                                                                                                                                                          |
| 225791_at   | UBE2F             | 2.2304385 | 1.1573274 | 2.2304385 up | chr1:180846942-180847333 (+) // 70.92 // q25.3                                                                                                                                                         |
| 238812_at   |                   | 2.229214  | 1.156535  | 2.229214 up  |                                                                                                                                                                                                        |
| 244755_at   | XPR1              | 2.227989  | 1.155742  | 2.227989 up  |                                                                                                                                                                                                        |

|              |                          |           |           |              |                                                 |
|--------------|--------------------------|-----------|-----------|--------------|-------------------------------------------------|
| 211323_s_at  | <i>ITPR1</i>             | 2.2278545 | 1.155655  | 2.2278545 up | chr3:4535137-4888187 (+) // 99.53 // p26.1      |
| 236238_at    |                          | 2.227691  | 1.155549  | 2.227691 up  | chr9:80581737-80582364 (-) // 99.52 // q21.2    |
| 1569111_at   | <i>SOX13</i>             | 2.225517  | 1.1541405 | 2.225517 up  | chr1:204042255-204088857 (+) // 63.84 // q32.1  |
| 229899_s_at  | <i>ZFAS1</i>             | 2.2237234 | 1.1529773 | 2.2237234 up | chr20:47905018-47905793 (+) // 83.27 // q13.13  |
| 238391_at    |                          | 2.2237046 | 1.1529651 | 2.2237046 up | chr17:62613279-62613710 (+) // 72.28 // q24.1   |
| 219906_at    | <i>EBLN2</i>             | 2.2229147 | 1.1524526 | 2.2229147 up | chr3:73111422-73112469 (+) // 99.9 // p13       |
| 1570299_at   |                          | 2.2219725 | 1.1518409 | 2.2219725 up | chr11:95754198-95755063 (-) // 26.66 // q21     |
| 238161_at    |                          | 2.221675  | 1.1516478 | 2.221675 up  | chr11:47117613-47118362 (+) // 60.52 // p11.2   |
| 1555774_at   | <i>ZAR1</i>              | 2.2212324 | 1.1513604 | 2.2212324 up | chr4:48492308-48496405 (+) // 93.2 // p11       |
| 233833_at    |                          | 2.2211967 | 1.1513371 | 2.2211967 up | chr19:15370204-15371609 (+) // 92.48 // p13.12  |
| 239465_at    |                          | 2.2193284 | 1.1501231 | 2.2193284 up | chr16:21988904-21989633 (+) // 99.73 // p12.2   |
| 233642_s_at  | <i>HEATR5B</i>           | 2.2191713 | 1.1500211 | 2.2191713 up | chr2:37208152-37241073 (-) // 99.73 // p22.2    |
| 205878_at    | <i>POU6F1</i>            | 2.2188077 | 1.1497847 | 2.2188077 up | chr12:51582944-51590818 (-) // 99.73 // q13.13  |
| 1562110_at   |                          | 2.2185373 | 1.1496089 | 2.2185373 up |                                                 |
| 224454_at    | <i>ETNK1</i>             | 2.218066  | 1.1493022 | 2.218066 up  | chr12:22778123-22797347 (+) // 91.69 // p12.1   |
| 204120_s_at  | <i>ADK</i>               | 2.2177744 | 1.1491126 | 2.2177744 up | chr10:75936443-76468781 (+) // 98.89 // q22.2   |
| 1562084_at   |                          | 2.2176757 | 1.1490484 | 2.2176757 up |                                                 |
| 1556249_a_at | <i>EIF1B-AS1</i>         | 2.2166376 | 1.1483729 | 2.2166376 up | chr3:40214635-40351033 (-) // 83.43 // p22.1    |
| 210943_s_at  | <i>LYST</i>              | 2.2163215 | 1.1481671 | 2.2163215 up | chr1:235954881-236046940 (-) // 99.71 // q42.3  |
| 222300_at    |                          | 2.2162151 | 1.148098  | 2.2162151 up | chr1:113199062-113199424 (+) // 74.62 // p13.2  |
| 235529_x_at  | <i>SAMHD1</i>            | 2.2162127 | 1.1480963 | 2.2162127 up | chr20:35518624-35519171 (-) // 30.38 // q11.23  |
| 208127_s_at  | <i>SOCS5</i>             | 2.2158377 | 1.1478522 | 2.2158377 up | chr2:46926348-46989442 (+) // 98.2 // p21       |
| 221288_at    | <i>GPR22</i>             | 2.2157292 | 1.1477816 | 2.2157292 up | chr7:107114505-107115807 (+) // 99.85 // q22.3  |
| 214442_s_at  | <i>PIAS2</i>             | 2.2156332 | 1.147719  | 2.2156332 up | chr18:44398172-44497466 (-) // 95.94 // q21.1   |
| 239721_at    |                          | 2.2148526 | 1.1472106 | 2.2148526 up | chr7:129488692-129489120 (-) // 99.07 // q32.2  |
| 232356_at    |                          | 2.2145126 | 1.1469892 | 2.2145126 up | chr8:133010123-133012206 (+) // 70.65 // q24.22 |
| 1565886_at   |                          | 2.21396   | 1.1466291 | 2.21396 up   | chr15:50872428-50873122 (-) // 90.58 // q21.2   |
| 220728_at    |                          | 2.2134573 | 1.1463015 | 2.2134573 up | chr2:39648532-39650033 (-) // 32.47 // p22.1    |
|              |                          |           |           |              | chr16:29472700-29475973 (+) // 100.0 //         |
|              |                          |           |           |              | p11.2///chr16:30212043-30215318 (+) // 100.0 // |
|              |                          |           |           |              | p11.2                                           |
| 209607_x_at  | <i>LOC101060714///SL</i> | 2.2120128 | 1.1453598 | 2.2120128 up | chr17:61822610-61850936 (-) // 96.66 // q23.3   |
| 217814_at    | <i>CCDC47</i>            | 2.2111769 | 1.1448144 | 2.2111769 up | chr19:8540559-8541444 (-) // 79.35 // p13.2     |
| 238610_s_at  |                          | 2.2109673 | 1.1446778 | 2.2109673 up | chr8:68091918-68092261 (+) // 98.84 // q13.2    |
| 242041_at    | <i>CSPP1</i>             | 2.2109265 | 1.144651  | 2.2109265 up |                                                 |

|             |                        |           |           |              |                                                  |
|-------------|------------------------|-----------|-----------|--------------|--------------------------------------------------|
| 221268_s_at | <i>SGPP1</i>           | 2.2099333 | 1.1440028 | 2.2099333 up | chr14:64151922-64194693 (-) // 95.88 // q23.2    |
| 218696_at   | <i>EIF2AK3</i>         | 2.2097347 | 1.1438731 | 2.2097347 up | chr2:88856349-88926864 (-) // 95.28 // p11.2     |
| 1561512_at  |                        | 2.2084403 | 1.1430279 | 2.2084403 up | chr7:133485251-133509641 (-) // 35.45 // q33     |
| 215295_at   | <i>DTNB</i>            | 2.2082067 | 1.1428752 | 2.2082067 up | chr2:25641562-25875529 (-) // 90.17 // p23.3     |
| 233800_at   |                        | 2.2069576 | 1.1420588 | 2.2069576 up | chr17:34006410-34011905 (+) // 52.9 // q12       |
|             |                        |           |           |              | chr15:32878305-32907530 (-) // 85.87 //          |
|             |                        |           |           |              | q13.3//chr15:30836849-30918145 (-) // 85.6 //    |
| 243336_at   | <i>LOC101059939</i>    | 2.20624   | 1.1415898 | 2.20624 up   | q13.2                                            |
| 216686_at   | <i>ANKRD36BP2</i>      | 2.2061296 | 1.1415175 | 2.2061296 up | chr2:89065408-89085430 (+) // 93.58 // p11.2     |
| 237148_at   |                        | 2.2055483 | 1.1411374 | 2.2055483 up | chrX:109493864-109494317 (+) // 60.18 // q23     |
| 220874_at   |                        | 2.2052603 | 1.140949  | 2.2052603 up | chr1:29394642-29395626 (+) // 65.88 // p35.3     |
| 237006_at   |                        | 2.205079  | 1.1408304 | 2.205079 up  | chr4:88043560-88044036 (+) // 56.42 // q22.1     |
| 235635_at   | <i>ARHGAP5</i>         | 2.2025886 | 1.1392    | 2.2025886 up | chr14:32628512-32628932 (+) // 97.0 // q12       |
| 228623_at   |                        | 2.201267  | 1.1383342 | 2.201267 up  | chrX:73470227-73470871 (-) // 55.26 // q13.2     |
| 230293_at   | <i>MEAF6</i>           | 2.2012167 | 1.1383013 | 2.2012167 up | chr1:37955564-37956069 (-) // 89.71 // p34.3     |
| 202146_at   | <i>IFRD1</i>           | 2.2011561 | 1.1382616 | 2.2011561 up | chr7:112090514-112116247 (+) // 95.85 // q31.1   |
| 1557585_at  | <i>ATP6V1H</i>         | 2.2010472 | 1.13819   | 2.2010472 up | chr8:54665639-54669931 (-) // 63.63 // q11.23    |
| 233239_at   |                        | 2.200236  | 1.1376584 | 2.200236 up  | chr18:72498777-72500587 (-) // 65.43 // q22.3    |
| 242599_at   |                        | 2.20018   | 1.1376216 | 2.20018 up   | chr16:78908605-78909243 (-) // 97.24 // q23.1    |
| 1558983_at  | <i>LRRC41</i>          | 2.1999228 | 1.137453  | 2.1999228 up | chr1:46762151-46766793 (-) // 39.39 // p34.1     |
| 214235_at   | <i>CYP3A5</i>          | 2.199588  | 1.1372334 | 2.199588 up  | chr7:99257868-99277589 (-) // 97.12 // q22.1     |
|             |                        |           |           |              | chrX:149099063-149099503 (+) // 98.88 //         |
|             |                        |           |           |              | q28//chrX:148629756-148630196 (-) // 98.88 //    |
|             |                        |           |           |              | q28                                              |
| 231589_at   | <i>OTTHUMG00000022</i> | 2.1993458 | 1.1370745 | 2.1993458 up | chr7:104756177-104756731 (-) // 93.88 // q22.3   |
| 230091_at   |                        | 2.1992753 | 1.1370282 | 2.1992753 up | chr8:90770064-90803290 (+) // 98.32 // q21.3     |
| 209544_at   | <i>RIPK2</i>           | 2.1992018 | 1.13698   | 2.1992018 up | chr8:130964821-130965290 (-) // 96.49 // q24.2.1 |
| 243182_at   |                        | 2.199152  | 1.1369474 | 2.199152 up  | chr4:119963178-119965092 (+) // 69.66 // q26     |
| 215439_x_at |                        | 2.1990888 | 1.1369059 | 2.1990888 up | chr3:135684566-135866736 (+) // 93.95 // q22.2   |
| 209632_at   | <i>PPP2R3A</i>         | 2.1990795 | 1.1368997 | 2.1990795 up | chr11:57538066-57538626 (+) // 57.58 // q12.1    |
| 238884_at   |                        | 2.1988423 | 1.1367441 | 2.1988423 up | chr7:104754997-104755933 (+) // 95.57 // q22.3   |
| 238552_at   |                        | 2.1970983 | 1.1355994 | 2.1970983 up | chr1:210780952-210785987 (+) // 13.25 // q32.2   |
| 1566424_at  |                        | 2.196861  | 1.1354436 | 2.196861 up  | chr19:15373568-15374081 (-) // 95.71 // p13.12   |
| 239149_at   |                        | 2.196135  | 1.1349667 | 2.196135 up  | chr22:43192535-43253219 (-) // 96.25 // q13.2    |
| 202211_at   | <i>ARFGAP3</i>         | 2.1957502 | 1.1347139 | 2.1957502 up |                                                  |



|             |                           |           |           |              |                                                  |
|-------------|---------------------------|-----------|-----------|--------------|--------------------------------------------------|
| 1560263_at  |                           | 2.194919  | 1.1341678 | 2.194919 up  | chr1:46103194-46104558 (-) // 74.52 // p34.1     |
| 211386_at   | <i>MGC12488</i>           | 2.1947856 | 1.13408   | 2.1947856 up |                                                  |
| 242239_at   | <i>ARL5B-AS1</i>          | 2.1946588 | 1.1339966 | 2.1946588 up | chr10:18941149-18941630 (-) // 59.12 // p12.31   |
| 216944_s_at | <i>ITPR1</i>              | 2.1943953 | 1.1338234 | 2.1943953 up | chr3:4558175-4888428 (+) // 99.44 // p26.1       |
| 1557208_at  | <i>PROSER2-AS1</i>        | 2.1943662 | 1.1338043 | 2.1943662 up | chr10:11891607-11936699 (-) // 71.38 // p14      |
|             |                           |           |           |              | chr1:148938452-148939999 (+) // 17.67 //         |
|             |                           |           |           |              | q21.2///chr7:151996609-151998141 (+) // 16.63 // |
|             |                           |           |           |              | q36.1///chr2:91836314-91837862 (-) // 17.67 //   |
| 233518_at   |                           | 2.1927114 | 1.132716  | 2.1927114 up | p11.1                                            |
| 239373_at   |                           | 2.1907573 | 1.1314297 | 2.1907573 up | chr20:47578848-47579714 (+) // 38.68 // q13.13   |
| 228768_at   | <i>FNIP1</i>              | 2.1897671 | 1.1307775 | 2.1897671 up | chr5:130977406-130978114 (-) // 87.42 // q31.1   |
| 211567_at   |                           | 2.1894524 | 1.13057   | 2.1894524 up | chr16:29674578-29676827 (+) // 68.75 // p11.2    |
| 228936_at   |                           | 2.188991  | 1.1302661 | 2.188991 up  |                                                  |
| 215398_at   |                           | 2.188772  | 1.1301217 | 2.188772 up  | chr1:193145135-193146488 (+) // 86.4 // q31.2    |
| 236515_at   |                           | 2.1876087 | 1.1293547 | 2.1876087 up | chr11:68348883-68349858 (+) // 98.88 // q13.2    |
| 215627_at   | <i>AC007405.4///OTTHI</i> | 2.1865048 | 1.1286266 | 2.1865048 up | chr2:171579718-171627276 (-) // 38.98 // q31.1   |
| 221580_s_at | <i>MIR1304///SNORA11</i>  | 2.186433  | 1.1285791 | 2.186433 up  | chr11:93463447-93474636 (-) // 98.66 // q21      |
| 212377_s_at | <i>NOTCH2</i>             | 2.1859686 | 1.1282727 | 2.1859686 up | chr1:120454177-120461138 (-) // 99.76 // p12     |
| 1565787_at  |                           | 2.185856  | 1.1281985 | 2.185856 up  | chr9:37230771-37233022 (+) // 57.1 // p13.2      |
| 236531_at   | <i>AC000123.2///OTTHI</i> | 2.1856298 | 1.128049  | 2.1856298 up | chr7:126999844-127000293 (-) // 42.46 // q31.33  |
| 212572_at   | <i>STK38L</i>             | 2.1855996 | 1.1280291 | 2.1855996 up | chr12:27450655-27478888 (+) // 98.88 // p11.23   |
| 220232_at   | <i>SCD5</i>               | 2.185342  | 1.1278591 | 2.185342 up  | chr4:83581040-83719925 (-) // 70.11 // q21.22    |
| 232779_at   |                           | 2.1847863 | 1.1274922 | 2.1847863 up | chr6:1696173-1697942 (-) // 62.28 // p25.3       |
| 225563_at   | <i>PAN3</i>               | 2.1835039 | 1.1266451 | 2.1835039 up | chr13:28867536-28869469 (+) // 97.26 // q12.2    |
| 227278_at   | <i>TAF13</i>              | 2.1831481 | 1.12641   | 2.1831481 up | chr1:109605107-109605652 (-) // 62.83 // p13.3   |
| 237388_at   |                           | 2.1829727 | 1.1262941 | 2.1829727 up | chr1:92715570-92716047 (-) // 65.62 // p22.1     |
| 1554793_at  | <i>UBE3C</i>              | 2.1829693 | 1.1262919 | 2.1829693 up | chr7:156931703-157009926 (+) // 94.69 // q36.3   |
| 220851_at   |                           | 2.182232  | 1.1258044 | 2.182232 up  | chr9:3479752-3481485 (+) // 48.86 // p24.2       |
| 233228_at   |                           | 2.1810203 | 1.1250032 | 2.1810203 up | chr18:72498753-72500570 (+) // 64.56 // q22.3    |
| 237944_at   |                           | 2.1804092 | 1.124599  | 2.1804092 up | chr2:238661294-238661768 (-) // 98.58 // q37.3   |
| 224234_at   |                           | 2.179683  | 1.1241183 | 2.179683 up  | chr4:76407032-76407863 (+) // 53.86 // q21.1     |
| 209688_s_at | <i>CCDC93</i>             | 2.1793354 | 1.1238883 | 2.1793354 up | chr2:118673148-118674470 (-) // 71.99 // q14.1   |
| 211628_x_at | <i>FTH1P5</i>             | 2.1791763 | 1.1237829 | 2.1791763 up | chr6:50880030-50881671 (-) // 44.31 // p12.3     |
| 234166_at   | <i>OTTHUMG00000176</i>    | 2.1780798 | 1.1230569 | 2.1780798 up | chr15:25590714-25591626 (-) // 23.14 // q11.2    |

|              |                           |           |           |              |                                                  |
|--------------|---------------------------|-----------|-----------|--------------|--------------------------------------------------|
| 232896_at    | <i>ERBB2IP</i>            | 2.1780243 | 1.12302   | 2.1780243 up | chr5:65282663-65284811 (+) // 37.42 // q12.3     |
| 237114_at    |                           | 2.1764932 | 1.1220055 | 2.1764932 up | chr10:69683332-69683774 (-) // 56.64 // q21.3    |
| 232525_at    |                           | 2.1764495 | 1.1219765 | 2.1764495 up | chr7:127663254-127666069 (+) // 86.44 // q32.1   |
| 223444_at    | <i>SENP7</i>              | 2.175784  | 1.1215354 | 2.175784 up  | chr3:101043121-101232085 (-) // 95.03 // q12.3   |
| 216174_at    | <i>HCRP1</i>              | 2.1735463 | 1.1200509 | 2.1735463 up | chr6:42326529-42328509 (+) // 76.9 // p21.1      |
| 234131_at    |                           | 2.1732082 | 1.1198264 | 2.1732082 up | chr15:58997384-58998640 (-) // 73.05 // q21.3    |
| 233871_at    |                           | 2.172951  | 1.1196556 | 2.172951 up  | chr20:10002621-10004019 (-) // 32.32 // p12.2    |
| 222142_at    | <i>CYLD</i>               | 2.1727996 | 1.1195551 | 2.1727996 up | chr16:50783873-50821659 (+) // 99.46 // q12.1    |
| 215597_x_at  |                           | 2.172519  | 1.1193688 | 2.172519 up  | chr10:76672543-76674775 (+) // 60.28 // q22.2    |
| 216112_at    |                           | 2.1721983 | 1.1191558 | 2.1721983 up | chr1:89280812-89282776 (+) // 29.71 // p22.2     |
| 1558821_s_at | <i>AC083843.1///OTTHI</i> | 2.172195  | 1.1191536 | 2.172195 up  | chr8:135806975-135807608 (-) // 16.13 // q24.22  |
| 203474_at    | <i>IQGAP2</i>             | 2.1717744 | 1.1188743 | 2.1717744 up | chr5:75699148-76003955 (+) // 99.29 // q13.3     |
|              |                           |           |           |              | chr10:122630680-122639140 (+) // 99.22 // q26.12 |
| 229694_at    | <i>WDR11</i>              | 2.1709223 | 1.1183081 | 2.1709223 up | chr8:52755066-52755852 (-) // 84.26 // q11.23    |
| 238902_at    |                           | 2.1708193 | 1.1182396 | 2.1708193 up | chr16:21475225-21531765 (-) // 98.49 // p12.2    |
| 208118_x_at  | <i>LOC100271836///LO</i>  | 2.1706061 | 1.118098  | 2.1706061 up | chr11:75524559-75525824 (-) // 65.27 // q13.5    |
| 237090_at    | <i>LOC100506113</i>       | 2.1697176 | 1.1175072 | 2.1697176 up | chr1:245011301-245011760 (-) // 97.45 // q44     |
| 236723_at    |                           | 2.1696336 | 1.1174514 | 2.1696336 up | chr16:81497496-81498464 (-) // 60.43 // q23.2    |
| 1555645_at   | <i>GAF2A</i>              | 2.169394  | 1.1172922 | 2.169394 up  | chr3:47121229-47121990 (-) // 79.52 // p21.31    |
| 241458_at    |                           | 2.1687992 | 1.1168965 | 2.1687992 up | chr7:151722863-151819424 (+) // 99.15 // q36.1   |
| 219013_at    | <i>GALNT11</i>            | 2.1684453 | 1.1166611 | 2.1684453 up | chr15:57359772-57363441 (+) // 73.12 // q21.3    |
| 233678_at    |                           | 2.1674073 | 1.1159703 | 2.1674073 up | chr1:47799550-47824547 (+) // 79.81 // p33       |
| 1570533_at   | <i>CMPK1</i>              | 2.1670303 | 1.1157193 | 2.1670303 up |                                                  |
| 242014_at    |                           | 2.166403  | 1.1153016 | 2.166403 up  |                                                  |
| 240926_at    | <i>LRCH3</i>              | 2.165889  | 1.1149594 | 2.165889 up  | chr3:197562320-197563059 (+) // 89.31 // q29     |
| 240314_at    |                           | 2.1652577 | 1.1145387 | 2.1652577 up | chr17:15949145-15949585 (-) // 39.69 // p12      |
| 231393_x_at  | <i>ZBTB43</i>             | 2.1648576 | 1.1142721 | 2.1648576 up | chr9:129600020-129600602 (-) // 96.04 // q33.3   |
| 232858_at    |                           | 2.1643243 | 1.1139166 | 2.1643243 up | chr1:41602556-41604205 (-) // 11.45 // p34.2     |
| 240656_at    |                           | 2.1636698 | 1.1134803 | 2.1636698 up | chr14:72204410-72204878 (+) // 97.3 // q24.2     |
| 214594_x_at  | <i>ATP8B1</i>             | 2.1635582 | 1.113406  | 2.1635582 up | chr18:55315027-55399039 (-) // 88.43 // q21.31   |
| 244778_x_at  |                           | 2.1633115 | 1.1132414 | 2.1633115 up | chr11:34091169-34091454 (+) // 95.96 // p13      |
| 209647_s_at  | <i>SOCS5</i>              | 2.1629694 | 1.1130131 | 2.1629694 up | chr2:46926090-46990379 (+) // 98.27 // p21       |
| 215630_at    |                           | 2.1624246 | 1.1126498 | 2.1624246 up | chr3:16514922-16516758 (-) // 39.86 // p24.3     |
| 1569730_at   | <i>MROH2B</i>             | 2.1623855 | 1.1126237 | 2.1623855 up | chr5:41057169-41071444 (-) // 97.63 // p13.1     |

|             |                          |           |           |              |                                                |
|-------------|--------------------------|-----------|-----------|--------------|------------------------------------------------|
| 236224_at   | <i>RIT1</i>              | 2.1621075 | 1.1124382 | 2.1621075 up | chr1:155867604-155868283 (+) // 82.09 // q22   |
| 211561_x_at | <i>MAPK14</i>            | 2.161984  | 1.1123558 | 2.161984 up  | chr6:35995916-36076386 (+) // 79.34 // p21.31  |
| 238970_at   |                          | 2.1610763 | 1.111175  | 2.1610763 up | chr5:32420416-32421031 (-) // 62.86 // p13.3   |
| 243857_at   | <i>MORF4L2</i>           | 2.1603687 | 1.1112775 | 2.1603687 up | chrX:102939352-102939957 (-) // 54.86 // q22.2 |
| 243316_x_at | <i>VPS26A</i>            | 2.1598504 | 1.1109314 | 2.1598504 up | chr10:70922272-70922692 (+) // 69.6 // q22.1   |
| 225783_at   | <i>UBE2F</i>             | 2.1597855 | 1.110888  | 2.1597855 up | chr2:238875684-238951236 (+) // 92.51 // q37.3 |
| 233224_at   |                          | 2.1588638 | 1.1102722 | 2.1588638 up | chr13:50351818-50354767 (-) // 53.91 // q14.2  |
| 244397_at   |                          | 2.158363  | 1.1099377 | 2.158363 up  | chr8:102219699-102220294 (+) // 49.51 // q22.3 |
| 240557_at   | <i>OTTHUMG00000175</i>   | 2.1582406 | 1.1098557 | 2.1582406 up | chr3:150183784-150184207 (+) // 54.37 // q25.1 |
| 239091_at   |                          | 2.157363  | 1.1092689 | 2.157363 up  | chr3:113214930-113215385 (-) // 76.19 // q13.2 |
| 241384_x_at | <i>GK5</i>               | 2.1573374 | 1.1092519 | 2.1573374 up | chr3:141882754-141883296 (-) // 89.27 // q23   |
| 236829_at   |                          | 2.1569374 | 1.1089842 | 2.1569374 up | chr3:69073972-69074525 (-) // 21.65 // p14.1   |
| 221899_at   | <i>N4BP2L2</i>           | 2.1564913 | 1.1086859 | 2.1564913 up | chr13:33100802-33101559 (-) // 38.49 // q13.1  |
| 234151_at   |                          | 2.1558442 | 1.108253  | 2.1558442 up | chr10:11219702-11221244 (+) // 87.46 // p14    |
| 232333_at   |                          | 2.1556947 | 1.1081529 | 2.1556947 up | chr11:96011097-96013717 (-) // 65.58 // q21    |
| 214814_at   | <i>YTHDC1</i>            | 2.1554573 | 1.107994  | 2.1554573 up | chr4:69186185-69188029 (-) // 100.0 // q13.2   |
| 241816_at   |                          | 2.15505   | 1.1077213 | 2.15505 up   |                                                |
| 209061_at   | <i>NCOA3</i>             | 2.1542525 | 1.1071874 | 2.1542525 up | chr20:46130620-46285616 (+) // 93.35 // q13.12 |
| 217532_x_at |                          | 2.1538367 | 1.1069089 | 2.1538367 up | chr5:159532606-159532781 (+) // 45.96 // q33.3 |
| 1564344_at  | <i>ATP9B</i>             | 2.1533902 | 1.1066098 | 2.1533902 up | chr18:76847306-77037268 (+) // 97.3 // q23     |
| 217452_s_at | <i>B3GALT2</i>           | 2.1525588 | 1.1060526 | 2.1525588 up | chr1:193148529-193155436 (-) // 81.6 // q31.2  |
| 203455_s_at | <i>SAT1</i>              | 2.152475  | 1.1059966 | 2.152475 up  | chrX:23801303-23804325 (+) // 97.45 // p22.11  |
| 220990_s_at | <i>MIR21///VMP1</i>      | 2.15185   | 1.1055775 | 2.15185 up   | chr17:57785002-57917950 (+) // 98.93 // q23.1  |
| 244609_at   |                          | 2.151782  | 1.1055319 | 2.151782 up  | chr17:45419087-45419537 (-) // 66.81 // q21.32 |
| 215908_at   |                          | 2.1507387 | 1.1048323 | 2.1507387 up |                                                |
| 1564656_at  |                          | 2.15029   | 1.1045313 | 2.15029 up   |                                                |
| 224124_at   | <i>ZRANB3</i>            | 2.1498182 | 1.1042147 | 2.1498182 up | chr2:135894486-135988499 (-) // 88.74 // q21.3 |
| 1555843_at  | <i>HNRNPM</i>            | 2.1497784 | 1.104188  | 2.1497784 up | chr19:8551907-8553994 (+) // 95.06 // p13.2    |
| 202677_at   | <i>RASA1</i>             | 2.1489983 | 1.1036643 | 2.1489983 up | chr5:86564150-86687732 (+) // 98.4 // q14.3    |
| 242268_at   | <i>CELF2</i>             | 2.148911  | 1.1036057 | 2.148911 up  | chr10:11269513-11270692 (+) // 90.24 // p14    |
| 224336_s_at | <i>DUSP16</i>            | 2.1485012 | 1.1033305 | 2.1485012 up | chr12:12628830-12715245 (-) // 98.44 // p13.2  |
| 224566_at   | <i>MIR612///NEAT1</i>    | 2.1484692 | 1.103309  | 2.1484692 up | chr11:65191943-65194000 (+) // 94.57 // q13.1  |
| 206318_at   | <i>EPPIN///EPPIN-WFC</i> | 2.1482801 | 1.1031821 | 2.1482801 up | chr20:44169549-44176017 (-) // 49.03 // q13.12 |
| 233270_x_at |                          | 2.1479216 | 1.1029413 | 2.1479216 up | chr8:17833365-17836642 (+) // 51.48 // p22     |

|              |                         |           |           |              |                                                  |
|--------------|-------------------------|-----------|-----------|--------------|--------------------------------------------------|
| 243997_x_at  |                         | 2.147266  | 1.1025008 | 2.147266 up  | chr13:20269867-20270233 (-) // 95.55 // q12.11   |
| 215122_at    | <i>TBX6</i>             | 2.1466255 | 1.1020706 | 2.1466255 up | chr16:29840393-30103208 (-) // 71.96 // p11.2    |
| 1561690_at   |                         | 2.1456013 | 1.101382  | 2.1456013 up | chr5:80813206-80815724 (-) // 60.89 // q14.1     |
| 223756_at    | <i>KANSL3</i>           | 2.1455293 | 1.1013336 | 2.1455293 up | chr2:97265389-97271137 (-) // 60.54 // q11.2     |
| 232962_x_at  |                         | 2.1451774 | 1.1010969 | 2.1451774 up | chr18:44366108-44367938 (-) // 52.05 // q21.1    |
| 232369_at    |                         | 2.1447222 | 1.1007907 | 2.1447222 up | chr13:98004539-98006293 (+) // 59.97 // q32.1    |
| 228723_at    | <i>NPTN-IT1</i>         | 2.1442015 | 1.1004405 | 2.1442015 up | chr15:73859364-73861047 (-) // 99.12 // q24.1    |
|              |                         |           |           |              | chr10:47398928-47399669 (+) // 63.87 //          |
|              |                         |           |           |              | q11.22///chr10:46916857-46917597 (+) // 63.6 //  |
|              |                         |           |           |              | q11.22///chr10:88928924-88929664 (+) // 61.98 // |
|              |                         |           |           |              | q23.2                                            |
| 243008_at    | <i>RHEB</i>             | 2.1437573 | 1.1001416 | 2.1437573 up | chr5:133858299-133859627 (-) // 100.0 // q31.1   |
| 243472_at    | <i>AC005355.3//OTTH</i> | 2.1433704 | 1.0998812 | 2.1433704 up | chr17:3814465-3815623 (-) // 47.49 // p13.2      |
| 1569346_a_at |                         | 2.1424227 | 1.0992432 | 2.1424227 up | chr1:120454177-120612261 (-) // 99.03 // p12     |
| 202443_x_at  | <i>NOTCH2</i>           | 2.142046  | 1.0989895 | 2.142046 up  | chr9:19377406-19377816 (-) // 65.57 // p22.1     |
| 238156_at    |                         | 2.1419477 | 1.0989232 | 2.1419477 up | chr7:131168470-131169934 (-) // 9.16 // q32.3    |
| 233316_at    |                         | 2.1409779 | 1.0982699 | 2.1409779 up | chr15:49302427-49302871 (-) // 60.27 // q21.1    |
| 244021_at    |                         | 2.1405091 | 1.097954  | 2.1405091 up | chr7:31829246-32110991 (-) // 99.93 // p14.3     |
| 207303_at    | <i>PDE1C</i>            | 2.1404128 | 1.0978891 | 2.1404128 up | chr3:114400024-114401937 (-) // 57.73 // q13.31  |
| 233296_x_at  |                         | 2.1400468 | 1.0976424 | 2.1400468 up | chr2:99764726-99771099 (+) // 98.38 // q11.2     |
| 242053_at    |                         | 2.139978  | 1.0975959 | 2.139978 up  | chr4:54279418-54280702 (+) // 37.03 // q12       |
| 233405_at    |                         | 2.139836  | 1.0975003 | 2.139836 up  | chr6:163836231-163991477 (+) // 93.86 // q26     |
| 212636_at    | <i>QKI</i>              | 2.1395898 | 1.0973341 | 2.1395898 up | chr5:158357269-158357740 (-) // 85.71 // q33.3   |
| 244876_at    |                         | 2.1393194 | 1.0971519 | 2.1393194 up | chr1:147451046-147452112 (+) // 2.7 //           |
|              |                         |           |           |              | q21.2///chr1:145909341-145910407 (+) // 2.7 //   |
|              |                         |           |           |              | q21.1                                            |
| 1562412_at   |                         | 2.1391535 | 1.0970399 | 2.1391535 up | chr13:111932949-111933417 (+) // 96.84 // q34    |
| 236416_at    | <i>ARHGEF7</i>          | 2.138708  | 1.0967396 | 2.138708 up  | chr15:51739907-51773473 (-) // 98.88 // q21.2    |
| 212820_at    | <i>DMXL2</i>            | 2.138614  | 1.0966761 | 2.138614 up  | chr4:143161039-143161481 (-) // 40.5 // q31.21   |
| 241303_x_at  |                         | 2.1385627 | 1.0966415 | 2.1385627 up | chr1:153845460-153846027 (-) // 20.79 // q21.3   |
| 238159_at    |                         | 2.1382995 | 1.0964639 | 2.1382995 up | chr11:10116230-10120302 (-) // 35.02 // p15.4    |
| 1566426_at   |                         | 2.13715   | 1.0956882 | 2.13715 up   | chr2:149273549-149274261 (+) // 98.47 // q23.1   |
| 244662_at    | <i>MBD5</i>             | 2.1367824 | 1.09544   | 2.1367824 up | chr1:212797778-212800117 (+) // 97.07 // q32.3   |
| 1552383_at   | <i>FAM71A</i>           | 2.1366448 | 1.095347  | 2.1366448 up | chr3:12635301-12635758 (-) // 76.59 // p25.2     |
| 244373_at    |                         | 2.135821  | 1.0947908 | 2.135821 up  |                                                  |

|              |                          |           |           |              |                                                  |
|--------------|--------------------------|-----------|-----------|--------------|--------------------------------------------------|
| 236781_at    |                          | 2.1351278 | 1.0943224 | 2.1351278 up | chr6:34958902-34959303 (+) // 95.38 // p21.31    |
| 1554285_at   | <i>HAVCR2</i>            | 2.134562  | 1.09394   | 2.134562 up  | chr5:156512842-156536051 (-) // 92.72 // q33.3   |
| 1566032_at   |                          | 2.133915  | 1.0935026 | 2.133915 up  | chr15:90804312-91105865 (+) // 30.64 // q26.1    |
| 1569545_at   |                          | 2.1332843 | 1.0930762 | 2.1332843 up |                                                  |
| 241391_at    |                          | 2.1328762 | 1.0928001 | 2.1328762 up | chr10:65083800-65084466 (-) // 33.43 // q21.3    |
| 238407_at    |                          | 2.132072  | 1.0922562 | 2.132072 up  | chr1:113199062-113199424 (-) // 74.62 // p13.2   |
| 237475_x_at  | <i>CCDC152</i>           | 2.1314251 | 1.0918183 | 2.1314251 up | chr5:42801739-42802169 (+) // 28.57 // p12       |
| 1556417_a_at |                          | 2.131048  | 1.091563  | 2.131048 up  | chr17:65934104-65934539 (+) // 67.25 // q24.2    |
| 215422_at    | 6.Mar                    | 2.1307719 | 1.0913761 | 2.1307719 up | chr5:10438887-10440500 (-) // 32.9 // p15.2      |
| 220578_at    | <i>ADAMTSL4//LOC10</i>   | 2.1297119 | 1.0906582 | 2.1297119 up | chr1:150522413-150524367 (+) // 85.79 // q21.3   |
| 243728_at    | <i>CTD-2236F14.1//OT</i> | 2.1283908 | 1.089763  | 2.1283908 up | chr5:75902430-75902884 (-) // 44.08 // q13.3     |
| 244027_at    |                          | 2.1282556 | 1.0896714 | 2.1282556 up |                                                  |
| 226958_s_at  | <i>MED11</i>             | 2.1281855 | 1.0896239 | 2.1281855 up | chr17:4634715-4636902 (+) // 93.24 // p13.2      |
| 242674_at    | <i>EIF4E</i>             | 2.1280956 | 1.089563  | 2.1280956 up | chr4:99792835-99793215 (-) // 93.55 // q23       |
| 241275_at    | <i>CAPZA1</i>            | 2.127368  | 1.0890696 | 2.127368 up  | chr1:113196360-113196768 (+) // 100.0 // p13.2   |
| 1555897_at   |                          | 2.1271248 | 1.0889046 | 2.1271248 up | chr1:23404830-23406532 (-) // 83.51 // p36.12    |
| 227333_at    |                          | 2.1268868 | 1.0887432 | 2.1268868 up | chr16:20866232-20868819 (-) // 95.89 // p12.3    |
| 206648_at    | <i>ZNF571</i>            | 2.1263785 | 1.0883985 | 2.1263785 up | chr19:38055165-38085673 (-) // 98.43 // q13.12   |
| 242612_at    |                          | 2.1261983 | 1.0882761 | 2.1261983 up | chr17:45698038-45698546 (+) // 48.16 // q21.32   |
| 237586_at    |                          | 2.1257021 | 1.0879394 | 2.1257021 up | chr1:51843885-51844697 (-) // 43.26 // p32.3     |
| 244276_at    | <i>KLB</i>               | 2.1256618 | 1.0879121 | 2.1256618 up | chr4:39450218-39450940 (+) // 60.91 // p14       |
| 243751_at    | <i>CHD2//LOC1005072</i>  | 2.124939  | 1.0874214 | 2.124939 up  | chr15:93493523-93493982 (+) // 42.98 // q26.1    |
| 210449_x_at  | <i>MAPK14</i>            | 2.1246529 | 1.0872271 | 2.1246529 up | chr6:35995919-36076261 (+) // 100.0 // p21.31    |
| 1567380_at   |                          | 2.1240888 | 1.0868441 | 2.1240888 up | chr10:126467361-126467665 (-) // 50.99 // q26.13 |
| 225011_at    | <i>PRKAR2A</i>           | 2.1235626 | 1.0864866 | 2.1235626 up | chr3:48784018-48785921 (-) // 81.73 // p21.31    |
| 227197_at    | <i>ARHGEF26</i>          | 2.123411  | 1.0863836 | 2.123411 up  | chr3:153975014-153975614 (+) // 79.58 // q25.2   |
| 234177_at    | <i>OTTHUMG00000184</i>   | 2.1226373 | 1.0858579 | 2.1226373 up | chr6:5665171-5667359 (-) // 69.04 // p25.1       |
| 215318_at    | <i>MINOS1P1</i>          | 2.1225355 | 1.0857887 | 2.1225355 up | chr13:33066435-33072495 (-) // 71.34 // q13.1    |
| 1563303_at   |                          | 2.1223733 | 1.0856785 | 2.1223733 up |                                                  |
| 217367_s_at  | <i>ZHX3</i>              | 2.122367  | 1.085674  | 2.122367 up  | chr20:39807090-39832067 (-) // 95.09 // q12      |
| 222415_at    | <i>KMT2C</i>             | 2.1218884 | 1.0853487 | 2.1218884 up | chr7:151832009-151936154 (-) // 98.18 // q36.1   |
| 244681_at    | <i>NUP210P1</i>          | 2.1209464 | 1.0847081 | 2.1209464 up | chr3:126385965-126386191 (+) // 48.09 // q21.3   |
| 237246_at    |                          | 2.120902  | 1.084678  | 2.120902 up  | chr3:160126094-160126568 (+) // 81.65 // q25.33  |

|             |                  |           |           |              |                                                  |
|-------------|------------------|-----------|-----------|--------------|--------------------------------------------------|
| 234212_at   | <i>ACTR2</i>     | 2.1205232 | 1.0844203 | 2.1205232 up | chr2:65468478-65470428 (-) // 84.68 // p14       |
| 233254_x_at | <i>PTEN</i>      | 2.1203024 | 1.08427   | 2.1203024 up | chr10:89707735-89708694 (+) // 11.49 // q23.31   |
| 232159_at   |                  | 2.1203    | 1.0842685 | 2.1203 up    | chr19:16468470-16472138 (+) // 83.42 // p13.11   |
| 1555703_at  | <i>ST3GAL3</i>   | 2.1202874 | 1.0842599 | 2.1202874 up | chr1:44201933-44395893 (+) // 100.0 // p34.1     |
| 235493_at   |                  | 2.1199155 | 1.0840068 | 2.1199155 up | chr2:71612632-71613423 (+) // 14.24 // p13.2     |
| 1556657_at  |                  | 2.1199055 | 1.0839999 | 2.1199055 up | chr3:152053707-152055414 (+) // 63.93 // q25.1   |
| 212220_at   | <i>PSME4</i>     | 2.1182592 | 1.0828792 | 2.1182592 up | chr2:54091205-54197787 (-) // 97.97 // p16.2     |
| 214980_at   | <i>UBE3A</i>     | 2.1181993 | 1.0828383 | 2.1181993 up | chr15:25577974-25582533 (-) // 68.26 // q11.2    |
| 241814_at   |                  | 2.1174994 | 1.0823616 | 2.1174994 up | chr6:13623855-13624302 (-) // 91.8 // p23        |
| 1557529_at  | <i>HECTD4</i>    | 2.1169908 | 1.082015  | 2.1169908 up | chr12:112687360-112711575 (-) // 93.89 // q24.13 |
| 1561763_at  |                  | 2.116555  | 1.081718  | 2.116555 up  | chr9:5936606-5936948 (-) // 97.69 // p24.1       |
| 1553757_at  | <i>IQCG</i>      | 2.1160529 | 1.0813757 | 2.1160529 up | chr3:197608910-197686884 (-) // 93.89 // q29     |
| 204843_s_at | <i>PRKAR2A</i>   | 2.1156256 | 1.0810844 | 2.1156256 up | chr3:48788678-48885218 (-) // 98.85 // p21.31    |
| 234560_at   |                  | 2.1153533 | 1.0808986 | 2.1153533 up | chr17:70938203-70939929 (-) // 93.25 // q25.1    |
| 216755_at   | <i>OSBPL10</i>   | 2.1151931 | 1.0807894 | 2.1151931 up | chr3:31944838-31946479 (-) // 68.27 // p23       |
| 210612_s_at | <i>SYNJ2</i>     | 2.113936  | 1.0799317 | 2.113936 up  | chr6:158402918-158519568 (+) // 99.84 // q25.3   |
| 214861_at   | <i>KDM4C</i>     | 2.1120095 | 1.0786164 | 2.1120095 up | chr9:6758060-7170921 (+) // 97.37 // p24.1       |
| 243832_at   |                  | 2.110841  | 1.0778179 | 2.110841 up  | chr2:128497182-128498170 (-) // 70.4 // q14.3    |
| 243817_at   |                  | 2.110569  | 1.077632  | 2.110569 up  | chr4:8406179-8406634 (-) // 91.16 // p16.1       |
| 241648_at   |                  | 2.1102898 | 1.0774411 | 2.1102898 up | chr2:24466376-24467014 (+) // 27.87 // p23.3     |
| 1561130_at  | <i>HECTD4</i>    | 2.109754  | 1.0770748 | 2.109754 up  | chr12:112698564-112699179 (-) // 93.81 // q24.13 |
| 1566033_at  |                  | 2.10919   | 1.0766891 | 2.10919 up   | chr15:90804342-91105865 (-) // 30.64 // q26.1    |
| 1553145_at  | <i>TAPT1-AS1</i> | 2.108913  | 1.0764996 | 2.108913 up  | chr4:16228285-16230285 (+) // 80.46 // p15.32    |
| 236923_x_at |                  | 2.108784  | 1.0764112 | 2.108784 up  | chr7:80284765-80285239 (+) // 46.75 // q21.11    |
|             |                  |           |           |              | chr1:143962733-143964886 (+) // 53.95 //         |
|             |                  |           |           |              | q21.1///chr1:120787251-120789373 (-) // 55.15 // |
|             |                  |           |           |              | p11.2///chr1:206086726-206088844 (-) // 55.34 // |
|             |                  |           |           |              | q32.1                                            |
| 1556352_at  |                  | 2.1076634 | 1.0756445 | 2.1076634 up | chr10:18966426-18966943 (+) // 93.32 // p12.31   |
| 242727_at   | <i>ARL5B</i>     | 2.1076593 | 1.0756418 | 2.1076593 up | chr15:52421170-52424561 (-) // 31.89 // q21.2    |
| 1560094_at  |                  | 2.1067176 | 1.074997  | 2.1067176 up | chr5:149900593-149919334 (+) // 90.59 // q33.1   |
| 1554010_at  | <i>NDST1</i>     | 2.1063328 | 1.0747334 | 2.1063328 up | chr13:99919913-99920865 (+) // 25.39 // q32.3    |
| 233554_at   |                  | 2.1061447 | 1.0746045 | 2.1061447 up | chr1:200593042-200639035 (-) // 78.04 // q32.1   |
| 223662_x_at | <i>DDX59</i>     | 2.105906  | 1.0744411 | 2.105906 up  | chr11:85668220-85669860 (-) // 98.13 // q14.2    |
| 212511_at   | <i>PICALM</i>    | 2.1052065 | 1.0739617 | 2.1052065 up |                                                  |

|              |                          |           |           |              |                                                 |
|--------------|--------------------------|-----------|-----------|--------------|-------------------------------------------------|
| 240128_at    |                          | 2.1043189 | 1.0733533 | 2.1043189 up | chr7:33100007-33100465 (-) // 73.05 // p14.3    |
| 1557814_a_at |                          | 2.1034532 | 1.0727597 | 2.1034532 up | chr5:80942429-80942874 (-) // 82.18 // q14.1    |
| 1570587_at   | <i>MPRIP-AS1///MPRIF</i> | 2.1033237 | 1.0726709 | 2.1033237 up | chr17:16979351-16981066 (-) // 83.97 // p11.2   |
| 236164_at    | <i>FLJ10038</i>          | 2.1032774 | 1.0726392 | 2.1032774 up | chr15:50641803-50642601 (-) // 35.21 // q21.2   |
| 1569312_at   |                          | 2.1031563 | 1.0725561 | 2.1031563 up | chr19:36706139-36707380 (+) // 59.77 // q13.12  |
| 1556865_at   |                          | 2.1027489 | 1.0722766 | 2.1027489 up | chr22:43339641-43341052 (-) // 53.18 // q13.2   |
| 229235_at    | <i>NFATC2IP</i>          | 2.102694  | 1.0722389 | 2.102694 up  | chr16:28977821-28978413 (+) // 71.6 // p11.2    |
| 233914_s_at  | <i>SBF2</i>              | 2.1020627 | 1.0718057 | 2.1020627 up | chr11:9859605-9861131 (-) // 63.95 // p15.4     |
| 238773_at    | <i>METTL15</i>           | 2.1019285 | 1.0717136 | 2.1019285 up | chr11:28354484-28355162 (+) // 54.02 // p14.1   |
| 215475_at    |                          | 2.10161   | 1.0714949 | 2.10161 up   | chr8:126266508-126267619 (-) // 31.02 // q24.13 |
| 230392_at    |                          | 2.1010628 | 1.0711193 | 2.1010628 up | chr19:8526272-8526815 (+) // 87.0 // p13.2      |
| 230663_at    |                          | 2.1007931 | 1.070934  | 2.1007931 up | chr2:153501960-153502671 (+) // 79.54 // q23.3  |
| 1560792_at   |                          | 2.0999475 | 1.0703532 | 2.0999475 up | chr1:181060244-181062035 (+) // 78.89 // q25.3  |
| 224159_x_at  | <i>TRIM4</i>             | 2.0997021 | 1.0701847 | 2.0997021 up | chr7:99488036-99517154 (-) // 72.7 // q22.1     |
| 227200_at    | <i>ETV3</i>              | 2.0996335 | 1.0701375 | 2.0996335 up | chr1:157090982-157092788 (-) // 93.08 // q23.1  |
| 232410_at    |                          | 2.09937   | 1.0699564 | 2.09937 up   | chr1:211477891-211480628 (+) // 89.25 // q32.2  |
| 242968_at    |                          | 2.0988817 | 1.0696208 | 2.0988817 up | chr8:38236826-38237277 (-) // 100.0 // p11.23   |
| 1557751_at   |                          | 2.0976822 | 1.0687962 | 2.0976822 up | chr1:91473278-91474800 (-) // 39.71 // p22.2    |
| 229677_at    | <i>SLC39A3</i>           | 2.0973527 | 1.0685695 | 2.0973527 up | chr19:2734523-2735009 (-) // 55.01 // p13.3     |
| 243096_at    |                          | 2.0971508 | 1.0684305 | 2.0971508 up | chr17:8363649-8364007 (+) // 76.1 // p13.1      |
| 1554612_at   | <i>KIAA0226</i>          | 2.0970302 | 1.0683476 | 2.0970302 up | chr3:197427333-197463773 (-) // 91.39 // q29    |
| 242480_at    |                          | 2.0969858 | 1.068317  | 2.0969858 up | chr8:41895224-41895620 (-) // 88.59 // p11.21   |
| 233702_x_at  |                          | 2.0969129 | 1.0682669 | 2.0969129 up | chr7:66163369-66164774 (+) // 56.5 // q11.21    |
| 215299_x_at  | <i>SULT1A1</i>           | 2.0960107 | 1.067646  | 2.0960107 up | chr16:28616830-28617930 (-) // 78.54 // p11.2   |
| 238303_at    |                          | 2.09511   | 1.067026  | 2.09511 up   | chr3:31621973-31622434 (+) // 100.0 // p23      |
| 242889_x_at  | <i>FUT8-AS1</i>          | 2.0947087 | 1.0667496 | 2.0947087 up | chr14:65877493-65877832 (-) // 61.96 // q23.3   |
| 243005_at    |                          | 2.0943198 | 1.0664818 | 2.0943198 up | chr15:65406537-65407022 (-) // 67.21 // q22.31  |
| 217237_at    | <i>ADAM3B///ADAM3B</i>   | 2.0940201 | 1.0662752 | 2.0940201 up | chr16:49551686-49552263 (-) // 97.41 // q12.1   |
| 1554306_at   | <i>ITPKB</i>             | 2.0938623 | 1.0661665 | 2.0938623 up | chr1:226894896-226927024 (-) // 87.75 // q42.12 |
| 233724_at    | <i>ARNT</i>              | 2.0933888 | 1.0658402 | 2.0933888 up | chr1:150813442-150815470 (-) // 73.91 // q21.3  |
| 236975_at    |                          | 2.0932257 | 1.0657278 | 2.0932257 up | chr13:27739206-27739723 (-) // 83.9 // q12.13   |
| 229063_s_at  | <i>CCDC107</i>           | 2.093209  | 1.0657164 | 2.093209 up  | chr9:35660738-35661184 (+) // 97.59 // p13.3    |
| 224316_at    |                          | 2.0931754 | 1.0656931 | 2.0931754 up | chr5:53345653-53347054 (+) // 61.89 // q11.2    |
| 235791_x_at  | <i>CHD1</i>              | 2.0931513 | 1.0656767 | 2.0931513 up | chr5:98190908-98191467 (-) // 91.96 // q15      |

|              |                 |       |           |           |              |                                                  |
|--------------|-----------------|-------|-----------|-----------|--------------|--------------------------------------------------|
| 211087_x_at  | MAPK14          |       | 2.0925164 | 1.065239  | 2.0925164 up | chr6:36043622-36043739 (+) // 66.1 // p21.31     |
| 215268_at    | KIAA0754        |       | 2.090765  | 1.0640309 | 2.090765 up  | chr1:39878115-39882158 (+) // 85.57 // p34.3     |
| 237062_at    |                 |       | 2.0905714 | 1.0638973 | 2.0905714 up | chr12:121010724-121011209 (-) // 7.72 // q24.31  |
| 229812_at    | USP48           |       | 2.0892453 | 1.062982  | 2.0892453 up | chr1:22054343-22054979 (-) // 96.91 // p36.12    |
| 232083_at    | KIF16B          |       | 2.0891678 | 1.0629283 | 2.0891678 up | chr20:16347487-16492158 (-) // 99.63 // p12.1    |
| 1555303_at   |                 |       | 2.088101  | 1.0621915 | 2.088101 up  | chr8:130887528-130890170 (-) // 49.62 // q24.21  |
| 1560995_s_at | OTTHUMG00000167 |       | 2.0880966 | 1.0621885 | 2.0880966 up | chr11:94292183-94292540 (+) // 41.73 // q21      |
|              |                 |       |           |           |              | chr10:104502869-104503247 (+) // 80.43 // q24.32 |
| 237334_at    |                 |       | 2.0878034 | 1.0619859 | 2.0878034 up |                                                  |
| 1554274_a_at | SSH1            |       | 2.087406  | 1.0617112 | 2.087406 up  | chr12:109185695-109251272 (-) // 95.35 // q24.11 |
| 233490_at    | DCTN4           |       | 2.0870469 | 1.061463  | 2.0870469 up | chr5:150088068-150090462 (-) // 88.1 // q33.1    |
| 244508_at    |                 | 7.Sep | 2.0868297 | 1.0613128 | 2.0868297 up | chr7:35881252-35881958 (+) // 92.89 // p14.2     |
| 215828_at    |                 |       | 2.086777  | 1.0612764 | 2.086777 up  | chr16:72916070-72918384 (-) // 96.1 // q22.3     |
| 244868_at    |                 |       | 2.0862515 | 1.0609131 | 2.0862515 up | chr8:123869068-123869599 (+) // 63.74 // q24.13  |
| 1557193_at   |                 |       | 2.0857546 | 1.0605695 | 2.0857546 up | chr18:12790115-12792061 (-) // 88.03 // p11.21   |
| 208191_x_at  | PSG4            |       | 2.085106  | 1.0601206 | 2.085106 up  | chr19:43696902-43709715 (-) // 75.57 // q13.31   |
| 235680_at    |                 |       | 2.0850747 | 1.060099  | 2.0850747 up | chr17:40515649-40516556 (-) // 85.76 // q21.2    |
| 1557586_s_at | ATP6V1H         |       | 2.0850549 | 1.0600853 | 2.0850549 up | chr8:54665639-54669931 (-) // 63.63 // q11.23    |
| 1559711_at   | FAM120A         |       | 2.0841508 | 1.0594597 | 2.0841508 up | chr9:96300702-96305039 (+) // 88.03 // q22.31    |
| 60084_at     | CYLD            |       | 2.0839043 | 1.059289  | 2.0839043 up | chr16:50821105-50821659 (+) // 89.74 // q12.1    |
| 228857_at    | GNL1            |       | 2.0837436 | 1.0591778 | 2.0837436 up | chr6:30509153-30509925 (-) // 46.77 // p21.33    |
| 202445_s_at  | NOTCH2          |       | 2.0837197 | 1.0591612 | 2.0837197 up | chr1:120454177-120612032 (-) // 99.86 // p12     |
| 1569345_at   |                 |       | 2.0835896 | 1.0590712 | 2.0835896 up | chr17:3814465-3815623 (-) // 47.49 // p13.2      |
| 233071_at    | RSPH4A          |       | 2.0834804 | 1.0589955 | 2.0834804 up | chr6:116943930-116954141 (+) // 82.08 // q22.1   |
| 1568943_at   | INPP5D          |       | 2.083348  | 1.0589038 | 2.083348 up  | chr2:233924569-233995358 (+) // 40.58 // q37.1   |
| 1560033_at   | MCCC2           |       | 2.0827465 | 1.0584872 | 2.0827465 up | chr5:70892137-70932538 (+) // 77.76 // q13.2     |
| 227121_at    |                 |       | 2.082351  | 1.0582132 | 2.082351 up  | chr3:114037652-114041768 (-) // 96.38 // q13.31  |
| 236343_at    |                 |       | 2.0817986 | 1.0578305 | 2.0817986 up |                                                  |
| 239783_at    |                 |       | 2.0817015 | 1.0577632 | 2.0817015 up | chr6:42219277-42219884 (-) // 88.33 // p21.1     |
| 208274_at    | OCLM            |       | 2.081275  | 1.0574676 | 2.081275 up  | chr1:186369703-186370587 (+) // 55.56 // q31.1   |
| 228997_at    | TRNAU1AP        |       | 2.0809693 | 1.0572556 | 2.0809693 up | chr1:28905047-28906498 (+) // 99.83 // p35.3     |
| 232601_at    |                 |       | 2.0802958 | 1.0567887 | 2.0802958 up | chr10:89074087-89078351 (-) // 45.32 // q23.2    |
| 241289_at    |                 |       | 2.079622  | 1.0563214 | 2.079622 up  | chr4:148599392-148599875 (-) // 50.41 // q31.23  |



|              |                   |           |           |              |                                                  |
|--------------|-------------------|-----------|-----------|--------------|--------------------------------------------------|
| 1559060_a_at | AC005593.1///OTTH | 2.0793593 | 1.056139  | 2.0793593 up | chr5:131131137-131132705 (-) // 97.27 // q31.1   |
| 1558170_at   |                   | 2.0787022 | 1.0556831 | 2.0787022 up |                                                  |
| 243851_at    | AURKAPS1///RAB3C  | 2.0786607 | 1.0556543 | 2.0786607 up | chr1:220337802-220338271 (-) // 71.22 // q41     |
| 1555960_at   | HINT1             | 2.07818   | 1.0553207 | 2.07818 up   | chr5:130494977-130497736 (-) // 58.23 // q23.3   |
| 236062_at    |                   | 2.0775545 | 1.0548862 | 2.0775545 up | chr3:23870233-23870669 (+) // 98.2 // p24.3      |
| 244035_at    | OTTHUMG0000018C   | 2.077468  | 1.0548261 | 2.077468 up  | chr18:60981038-60981475 (-) // 93.06 // q21.33   |
| 243025_at    |                   | 2.076747  | 1.0543255 | 2.076747 up  | chr16:47226836-47227934 (-) // 48.0 // q12.1     |
| 226713_at    | CCDC50            | 2.0761702 | 1.0539248 | 2.0761702 up | chr3:191114955-191116458 (+) // 98.21 // q28     |
| 223679_at    | CTNNB1            | 2.0755796 | 1.0535144 | 2.0755796 up | chr3:41277162-41278958 (+) // 46.63 // p22.1     |
| 234123_at    |                   | 2.0753462 | 1.0533521 | 2.0753462 up | chr5:65264936-65268217 (-) // 73.84 // q12.3     |
| 238292_at    |                   | 2.074313  | 1.0526335 | 2.074313 up  | chr6:166741978-166742356 (-) // 16.2 // q27      |
| 1569578_at   |                   | 2.0731714 | 1.0518394 | 2.0731714 up | chr16:89471920-89473267 (-) // 68.32 // q24.3    |
| 201920_at    | SLC20A1           | 2.0729527 | 1.0516872 | 2.0729527 up | chr2:113403607-113421402 (+) // 98.26 // q13     |
| 234122_at    |                   | 2.0727167 | 1.051523  | 2.0727167 up | chr18:29876685-29881750 (-) // 68.97 // q12.1    |
| 236419_at    |                   | 2.0725925 | 1.0514365 | 2.0725925 up | chr3:30673135-30673673 (-) // 78.73 // p24.1     |
| 224295_at    |                   | 2.0718272 | 1.0509037 | 2.0718272 up | chr11:35764740-35765785 (+) // 62.9 // p13       |
| 242074_at    |                   | 2.0708811 | 1.0502448 | 2.0708811 up | chr22:28294427-28294881 (-) // 71.78 // q12.1    |
| 242926_at    |                   | 2.07059   | 1.0500419 | 2.07059 up   | chr2:209137705-209138175 (+) // 30.9 // q34      |
| 1557522_x_at |                   | 2.0700731 | 1.0496818 | 2.0700731 up | chr20:36129859-36132023 (-) // 32.01 // q11.23   |
| 216621_at    |                   | 2.0700543 | 1.0496686 | 2.0700543 up |                                                  |
| 242106_at    |                   | 2.0699854 | 1.0496205 | 2.0699854 up | chr22:22172215-22172576 (-) // 59.83 // q11.21   |
| 220859_at    |                   | 2.0699399 | 1.0495889 | 2.0699399 up | chr18:13574620-13576420 (+) // 28.66 // p11.21   |
| 1557707_at   |                   | 2.0699134 | 1.0495703 | 2.0699134 up | chr6:157445585-157445916 (+) // 54.91 // q25.3   |
| 217016_x_at  | TMEM212           | 2.0696168 | 1.0493636 | 2.0696168 up | chr15:24989344-25537681 (-) // 14.56 // q11.2    |
| 233313_at    |                   | 2.0685792 | 1.0486401 | 2.0685792 up | chr20:2960567-2963834 (+) // 31.84 // p13        |
| 203461_at    | CHD2///LOC1005072 | 2.0683415 | 1.0484744 | 2.0683415 up | chr15:93443418-93564751 (+) // 81.94 // q26.1    |
| 1554116_s_at | PARP11            | 2.0672731 | 1.047729  | 2.0672731 up | chr12:3900213-3982602 (-) // 73.67 // p13.32     |
| 234154_at    |                   | 2.0661893 | 1.0469724 | 2.0661893 up | chr18:33196451-33198560 (-) // 73.91 // q12.2    |
| 206301_at    | TEC               | 2.0658042 | 1.0467036 | 2.0658042 up | chr4:48137800-48230678 (-) // 96.52 // p12       |
| 211187_at    |                   | 2.0651183 | 1.0462244 | 2.0651183 up | chr7:35915111-35916589 (-) // 66.65 // p14.2     |
| 203929_s_at  | MAPT              | 2.0646539 | 1.0458999 | 2.0646539 up | chr17:43971829-44103471 (+) // 93.36 // q21.31   |
| 202466_at    | PAPD7             | 2.0643494 | 1.0456872 | 2.0643494 up | chr5:6737619-6757156 (+) // 98.32 // p15.31      |
| 217586_x_at  |                   | 2.0632908 | 1.0449471 | 2.0632908 up | chr12:111921276-111921687 (-) // 33.33 // q24.12 |
| 1556277_a_at | PAPD4             | 2.06303   | 1.0447648 | 2.06303 up   | chr5:78916329-78916928 (+) // 52.38 // q14.1     |

|              |                        |           |           |              |                                                  |
|--------------|------------------------|-----------|-----------|--------------|--------------------------------------------------|
| 236067_at    |                        | 2.0628777 | 1.0446582 | 2.0628777 up | chr13:97878700-97879319 (+) // 94.13 // q32.1    |
| 212521_s_at  | <i>PDE8A</i>           | 2.0624776 | 1.0443784 | 2.0624776 up | chr15:85610295-85682370 (+) // 95.3 // q25.3     |
| 230952_at    | <i>OTTHUMG00000176</i> | 2.0622153 | 1.0441949 | 2.0622153 up |                                                  |
| 238252_at    |                        | 2.0616946 | 1.0438306 | 2.0616946 up | chr10:123587328-123587745 (-) // 95.41 // q26.13 |
| 240957_at    |                        | 2.0613673 | 1.0436016 | 2.0613673 up | chr10:70894289-70894687 (+) // 18.72 // q22.1    |
| 217268_at    | <i>RAB7A</i>           | 2.061061  | 1.0433872 | 2.061061 up  | chr3:128531212-128532933 (-) // 70.13 // q21.3   |
| 240512_x_at  | <i>KCTD4</i>           | 2.0606217 | 1.0430797 | 2.0606217 up | chr13:45767245-45767604 (-) // 92.93 // q14.12   |
| 240318_at    | <i>AFMID</i>           | 2.0604572 | 1.0429646 | 2.0604572 up | chr17:76193224-76193641 (+) // 20.41 // q25.3    |
| 235990_at    | <i>LOC100130987</i>    | 2.0604293 | 1.042945  | 2.0604293 up | chr11:67085511-67088804 (+) // 44.92 // q13.2    |
| 1565714_at   |                        | 2.0600488 | 1.0426786 | 2.0600488 up | chr22:36751405-36751898 (-) // 76.36 // q12.3    |
| 214932_at    | <i>KIDINS220</i>       | 2.0581837 | 1.0413717 | 2.0581837 up | chr2:8897327-8977730 (-) // 98.94 // p25.1       |
| 1560128_x_at | <i>C5orf56</i>         | 2.0580575 | 1.0412834 | 2.0580575 up | chr5:131805868-131808703 (+) // 64.37 // q31.1   |
| 239797_at    |                        | 2.058025  | 1.0412605 | 2.058025 up  | chr1:111717714-111718389 (+) // 52.68 // p13.3   |
| 1559038_at   | 2.Sep                  | 2.0577912 | 1.0410966 | 2.0577912 up | chr2:242255282-242257536 (+) // 92.46 // q37.3   |
| 1556658_a_at |                        | 2.0565393 | 1.0402186 | 2.0565393 up | chr3:152053707-152055414 (+) // 63.93 // q25.1   |
| 242225_at    |                        | 2.0564172 | 1.040133  | 2.0564172 up | chr12:62980371-62981159 (+) // 95.24 // q14.1    |
| 228990_at    | <i>SNHG12//SNORA16</i> | 2.0564127 | 1.0401299 | 2.0564127 up | chr1:28905047-28906498 (-) // 99.83 // p35.3     |
| 239442_at    | <i>CEP68</i>           | 2.0561266 | 1.039929  | 2.0561266 up | chr2:65301917-65302388 (+) // 43.1 // p14        |
| 1558732_at   | <i>MAP4K4</i>          | 2.0559387 | 1.0397973 | 2.0559387 up | chr2:102441863-102478702 (+) // 80.4 // q11.2    |
| 216115_at    | <i>NF1</i>             | 2.0544317 | 1.0387393 | 2.0544317 up | chr17:29579560-29581291 (+) // 82.32 // q11.2    |
| 1554690_a_at | <i>TACC1</i>           | 2.0540285 | 1.0384562 | 2.0540285 up | chr8:38586157-38705635 (+) // 85.17 // p11.22    |
| 224166_at    | <i>SLC25A2</i>         | 2.0539997 | 1.0384359 | 2.0539997 up | chr5:140682195-140683432 (-) // 100.0 // q31.3   |
| 233876_at    |                        | 2.0533612 | 1.0379874 | 2.0533612 up | chr12:22789025-22790970 (+) // 9.87 // p12.1     |
| 215944_at    | <i>OTTHUMG00000009</i> | 2.0533576 | 1.0379848 | 2.0533576 up | chr1:83439585-83444970 (-) // 21.13 // p31.1     |
| 233781_s_at  | <i>RIF1</i>            | 2.0520942 | 1.037097  | 2.0520942 up | chr2:152351740-152354727 (+) // 48.77 // q23.3   |
| 241643_at    | <i>TLK1</i>            | 2.0516527 | 1.0367864 | 2.0516527 up | chr2:171909877-171910501 (+) // 42.8 // q31.1    |
| 213918_s_at  | <i>NIPBL</i>           | 2.0511067 | 1.0364026 | 2.0511067 up | chr5:37061833-37064642 (+) // 52.87 // p13.2     |
| 237106_at    | <i>SLC11A2</i>         | 2.0507948 | 1.0361831 | 2.0507948 up | chr12:51397894-51398540 (-) // 91.78 // q13.12   |
| 1562098_at   | <i>OTTHUMG00000176</i> | 2.0498476 | 1.0355167 | 2.0498476 up | chr12:100420028-100421318 (-) // 19.17 // q23.1  |
| 236437_at    |                        | 2.0498326 | 1.0355061 | 2.0498326 up | chr7:107565893-107566316 (+) // 77.91 // q31.1   |
| 242116_x_at  |                        | 2.0497222 | 1.0354284 | 2.0497222 up | chr4:73977696-73978790 (-) // 62.35 // q13.3     |
| 216006_at    |                        | 2.0491674 | 1.0350379 | 2.0491674 up | chr17:38380851-38382441 (+) // 81.55 // q21.1    |
| 214722_at    | <i>NOTCH2NL</i>        | 2.0474412 | 1.0338221 | 2.0474412 up | chr1:145285251-145289644 (+) // 55.28 // q21.1   |

|             |                        |           |           |              |
|-------------|------------------------|-----------|-----------|--------------|
| 239591_at   |                        | 2.046999  | 1.0335104 | 2.046999 up  |
| 222040_at   | <i>HNRNPA1</i>         | 2.046785  | 1.0333596 | 2.046785 up  |
| 1563898_at  | <i>OTTHUMG00000166</i> | 2.0463612 | 1.0330608 | 2.0463612 up |
| 234125_at   |                        | 2.0459795 | 1.0327916 | 2.0459795 up |
| 236462_at   |                        | 2.0459242 | 1.0327526 | 2.0459242 up |
| 229841_at   |                        | 2.045769  | 1.0326433 | 2.045769 up  |
| 217798_at   | <i>CNOT2</i>           | 2.0454936 | 1.032449  | 2.0454936 up |
| 1566272_at  | <i>RALGAPA1</i>        | 2.0454004 | 1.0323832 | 2.0454004 up |
| 241415_at   |                        | 2.0444624 | 1.0317216 | 2.0444624 up |
| 241944_x_at |                        | 2.044277  | 1.0315907 | 2.044277 up  |
| 243906_at   |                        | 2.044224  | 1.0315533 | 2.044224 up  |
| 241240_at   |                        | 2.0435123 | 1.0310509 | 2.0435123 up |
| 240978_at   |                        | 2.0418146 | 1.0298519 | 2.0418146 up |
| 244188_at   |                        | 2.0418043 | 1.0298445 | 2.0418043 up |
| 1559132_at  | <i>TMEM80</i>          | 2.040975  | 1.0292586 | 2.040975 up  |
| 210109_at   | <i>SND1-IT1</i>        | 2.0402186 | 1.0287237 | 2.0402186 up |
| 1564665_at  |                        | 2.0394895 | 1.0282081 | 2.0394895 up |
| 210592_s_at | <i>SAT1</i>            | 2.0391006 | 1.027933  | 2.0391006 up |
| 243111_at   |                        | 2.0377479 | 1.0269755 | 2.0377479 up |
| 226741_at   | <i>SLC12A6</i>         | 2.0374033 | 1.0267316 | 2.0374033 up |
| 240600_at   |                        | 2.0372868 | 1.026649  | 2.0372868 up |
| 223620_at   | <i>GPR34</i>           | 2.036937  | 1.0264014 | 2.036937 up  |
| 242540_at   | <i>DNHD1</i>           | 2.0368948 | 1.0263715 | 2.0368948 up |
| 215109_at   | <i>RC3H1</i>           | 2.0367706 | 1.0262835 | 2.0367706 up |
| 238968_at   |                        | 2.0355973 | 1.0254523 | 2.0355973 up |
| 215374_at   | <i>PAPOLA</i>          | 2.0354545 | 1.025351  | 2.0354545 up |
| 1558120_at  | <i>DDX3X</i>           | 2.0351086 | 1.0251058 | 2.0351086 up |
| 1569268_at  | <i>GRIN2C</i>          | 2.034714  | 1.024826  | 2.034714 up  |
| 239264_at   |                        | 2.0346363 | 1.024771  | 2.0346363 up |
| 203508_at   | <i>TNFRSF1B</i>        | 2.034514  | 1.0246842 | 2.034514 up  |
| 214354_x_at | <i>SFTPB</i>           | 2.0344417 | 1.0246329 | 2.0344417 up |
| 201859_at   | <i>SRGN</i>            | 2.0335948 | 1.0240324 | 2.0335948 up |

chr17:44324232-44325216 (+) // 77.58 //  
q21.31///chr17:43675442-43676443 (-) // 76.99 //  
q21.31  
chr12:54680412-54680870 (+) // 97.86 // q13.13  
chr12:27124518-27132515 (+) // 66.38 // p11.23  
chr5:65264936-65268216 (+) // 73.81 // q12.3  
chr3:183476756-183477364 (+) // 74.13 // q27.1  
chr8:141532180-141532649 (+) // 93.17 // q24.3  
chr12:70636085-70748773 (+) // 93.47 // q15  
chr14:36194269-36194855 (+) // 93.4 // q13.2

chr12:6449265-6450891 (-) // 84.1 // p13.31  
chr3:195950100-195950564 (+) // 34.76 // q29  
chr1:161882346-161882732 (+) // 70.13 // q23.3  
chr4:74115001-74115326 (-) // 47.53 // q13.3  
chr11:32951048-32951504 (-) // 100.0 // p13  
chr11:695188-696449 (+) // 80.99 // p15.5  
chr7:127637561-127639444 (+) // 75.59 // q32.1

chrX:23801463-23804123 (+) // 68.61 // p22.11  
chr10:97631686-97632810 (-) // 61.44 // q24.1  
chr15:34519891-34525006 (-) // 84.98 // q14  
chr5:77376472-77376923 (-) // 99.12 // q14.1  
chrX:41554808-41556182 (+) // 99.78 // p11.4  
chr11:6541651-6542097 (+) // 99.11 // p15.4  
chr1:173985580-173991508 (-) // 79.52 // q25.1  
chr2:196522774-196523636 (-) // 95.91 // q32.3  
chr14:97008338-97019848 (+) // 77.55 // q32.2  
chrX:41193414-41197878 (+) // 89.33 // p11.4  
chr17:72849670-72856966 (-) // 77.46 // q25.1  
chr7:133346039-133346441 (+) // 52.95 // q33  
chr1:12227059-12269276 (+) // 86.56 // p36.22  
chr2:85884804-85885613 (-) // 40.73 // p11.2  
chr10:70847896-70864558 (+) // 99.24 // q22.1

|              |                          |           |           |              |                                                  |
|--------------|--------------------------|-----------|-----------|--------------|--------------------------------------------------|
| 1561884_at   | <i>CEPT1</i>             | 2.0333297 | 1.0238441 | 2.0333297 up | chr1:111682276-111703575 (+) // 89.69 // p13.3   |
| 221676_s_at  | <i>CORO1C</i>            | 2.0329406 | 1.0235682 | 2.0329406 up | chr12:109040347-109125280 (-) // 96.49 // q24.11 |
| 1559174_at   | <i>RAB6A</i>             | 2.0328672 | 1.0235159 | 2.0328672 up | chr11:73440978-74089368 (-) // 35.83 // q13.4    |
| 233015_at    | <i>MBNL1</i>             | 2.0328462 | 1.0235012 | 2.0328462 up | chr3:152171191-152173610 (+) // 99.46 // q25.2   |
| 228030_at    | <i>RBM6</i>              | 2.0325649 | 1.0233014 | 2.0325649 up | chr3:50099017-50099541 (-) // 92.88 // p21.31    |
| 243739_at    |                          | 2.031967  | 1.022877  | 2.031967 up  | chr6:13636056-13636400 (-) // 7.91 // p23        |
| 209267_s_at  | <i>SLC39A8</i>           | 2.031264  | 1.0223778 | 2.031264 up  | chr4:103182820-103266296 (-) // 99.69 // q24     |
| 237893_at    |                          | 2.0308049 | 1.0220516 | 2.0308049 up | chr8:28867059-28867475 (-) // 91.67 // p12       |
| 233957_at    |                          | 2.0297713 | 1.0213172 | 2.0297713 up | chr6:149706670-149711431 (+) // 31.25 // q25.1   |
| 1552969_a_at | <i>ZMYM6</i>             | 2.0293734 | 1.0210344 | 2.0293734 up | chr1:35484113-35497291 (-) // 82.09 // p34.3     |
| 234163_at    | <i>UBE3A</i>             | 2.029056  | 1.0208088 | 2.029056 up  | chr15:25590714-25591626 (+) // 23.14 // q11.2    |
| 222488_s_at  | <i>DCTN4</i>             | 2.0284948 | 1.0204097 | 2.0284948 up | chr5:150088308-150138576 (-) // 98.17 // q33.1   |
| 226762_at    | <i>PURB</i>              | 2.02847   | 1.020392  | 2.02847 up   | chr7:44916847-44920664 (-) // 97.71 // p13       |
| 235540_at    | <i>GNRH1</i>             | 2.0272005 | 1.0194888 | 2.0272005 up | chr8:25281884-25282556 (-) // 84.65 // p21.2     |
| 243685_at    |                          | 2.02662   | 1.0190755 | 2.02662 up   | chr2:182345215-182345685 (+) // 81.7 // q31.3    |
| 219208_at    | <i>FBXO11</i>            | 2.026274  | 1.0188292 | 2.026274 up  | chr2:48039989-48063101 (-) // 99.9 // p16.3      |
| 211137_s_at  | <i>ATP2C1</i>            | 2.026208  | 1.0187823 | 2.026208 up  | chr3:130613021-130721992 (+) // 98.08 // q22.1   |
| 242688_at    |                          | 2.0258837 | 1.0185513 | 2.0258837 up | chr2:230767716-230768136 (-) // 53.35 // q36.3   |
| 241930_x_at  |                          | 2.0254974 | 1.0182763 | 2.0254974 up | chr12:112928749-112929079 (+) // 99.7 // q24.13  |
| 241947_at    | <i>PCED1B-AS1</i>        | 2.025379  | 1.0181918 | 2.025379 up  | chr12:47608924-47610127 (-) // 77.19 // q13.11   |
| 243658_at    |                          | 2.025054  | 1.0179604 | 2.025054 up  | chr8:11662432-11663317 (-) // 27.45 // p23.1     |
| 1558173_a_at | <i>LUZP1</i>             | 2.0240016 | 1.0172104 | 2.0240016 up | chr1:23419935-23504301 (-) // 93.72 // p36.12    |
| 202625_at    | <i>LYN</i>               | 2.0239558 | 1.0171778 | 2.0239558 up | chr8:56791985-56924592 (+) // 97.41 // q12.1     |
| 231005_at    |                          | 2.023841  | 1.0170959 | 2.023841 up  | chr16:58611005-58611677 (-) // 66.03 // q21      |
| 207731_at    |                          | 2.023724  | 1.0170126 | 2.023724 up  | chr5:87515920-87517070 (+) // 31.14 // q14.3     |
| 229980_s_at  | <i>SNX5</i>              | 2.0222898 | 1.0159897 | 2.0222898 up | chr20:17922804-17924626 (-) // 63.21 // p11.23   |
| 238296_at    | <i>GLIPR1L1</i>          | 2.0222845 | 1.015986  | 2.0222845 up | chr12:75728557-75764019 (+) // 98.02 // q21.2    |
| 236472_at    |                          | 2.0220633 | 1.0158281 | 2.0220633 up | chr1:52223360-52224095 (+) // 42.99 // p32.3     |
| 227518_at    | <i>SLC35E1</i>           | 2.0219846 | 1.015772  | 2.0219846 up | chr19:16661666-16662597 (-) // 82.53 // p13.11   |
| 217473_x_at  | <i>SLC11A1</i>           | 2.021972  | 1.015763  | 2.021972 up  | chr2:219246916-219260521 (+) // 76.4 // q35      |
| 1555405_at   | <i>UBE3C</i>             | 2.0218163 | 1.015652  | 2.0218163 up | chr7:156931609-156981988 (+) // 94.67 // q36.3   |
| 1558854_a_at |                          | 2.0212727 | 1.0152639 | 2.0212727 up | chr17:45515760-45517787 (-) // 45.36 // q21.32   |
| 1554015_a_at | <i>CHD2///LOC1005072</i> | 2.0210412 | 1.0150987 | 2.0210412 up | chr15:93443564-93492460 (+) // 97.36 // q26.1    |

|              |                                             |           |           |              |                                                  |
|--------------|---------------------------------------------|-----------|-----------|--------------|--------------------------------------------------|
| 231385_at    | <i>DPPA3</i> /// <i>DPPA3P2</i> ///         | 2.0195773 | 1.0140533 | 2.0195773 up | chr12:7869728-7870155 (+) // 95.53 //            |
| 234276_at    |                                             | 2.019572  | 1.0140495 | 2.019572 up  | p13.31///chr14:36841153-36841585 (+) // 95.75 // |
| 235511_at    |                                             | 2.0195441 | 1.0140296 | 2.0195441 up | q13.3///chrX:103215887-103216326 (-) // 94.85 // |
| 210726_at    | <i>CYP3A4</i>                               | 2.0193474 | 1.0138891 | 2.0193474 up | q22.2                                            |
| 236207_at    | <i>SSFA2</i>                                | 2.018919  | 1.0135831 | 2.018919 up  | chr10:11548733-11550874 (-) // 48.94 // p14      |
| 213065_at    | <i>ZFC3H1</i>                               | 2.018644  | 1.0133866 | 2.018644 up  | chr11:66434308-66434942 (-) // 76.5 // q13.2     |
| 215612_at    |                                             | 2.0184746 | 1.0132654 | 2.0184746 up | chr7:99354582-99381772 (-) // 83.68 // q22.1     |
|              |                                             |           |           |              | chr2:182756922-182766664 (+) // 74.29 // q31.3   |
|              |                                             |           |           |              | chr12:72003261-72025625 (-) // 94.43 // q21.1    |
|              |                                             |           |           |              | chr3:17237262-17239580 (-) // 45.8 // p24.3      |
| 215377_at    | <i>CTBP2</i>                                | 2.0183563 | 1.0131809 | 2.0183563 up | chr10:126775661-126779095 (-) // 69.84 // q26.13 |
| 1558804_at   | <i>OTTHUMG00000173</i>                      | 2.0178375 | 1.01281   | 2.0178375 up | chr7:39987119-39989350 (-) // 86.8 // p14.1      |
| 207730_x_at  |                                             | 2.0177817 | 1.01277   | 2.0177817 up | chr19:4477051-5145589 (+) // 37.96 // p13.3      |
| 241974_at    |                                             | 2.017491  | 1.0125624 | 2.017491 up  | chr17:1458747-1459535 (-) // 99.62 // p13.3      |
| 228999_at    | <i>CHD2</i> /// <i>LOC1005072</i>           | 2.0170345 | 1.0122358 | 2.0170345 up | chr15:93443912-93445632 (+) // 99.34 // q26.1    |
| 234459_at    | <i>PPHLN1</i>                               | 2.0170183 | 1.0122242 | 2.0170183 up | chr12:42781191-42794269 (+) // 59.27 // q12      |
| 242182_x_at  |                                             | 2.0168355 | 1.0120933 | 2.0168355 up |                                                  |
| 238185_at    |                                             | 2.0166788 | 1.0119812 | 2.0166788 up | chr2:161163251-161163872 (+) // 96.41 // q24.2   |
| 209689_at    | <i>CCDC93</i>                               | 2.0160048 | 1.011499  | 2.0160048 up | chr2:118673148-118674470 (-) // 71.99 // q14.1   |
| 244074_at    | <i>OTTHUMG00000173</i>                      | 2.0156004 | 1.0112097 | 2.0156004 up | chr8:134584421-134585999 (+) // 75.23 // q24.22  |
| 1558803_at   |                                             | 2.014759  | 1.0106074 | 2.014759 up  | chr16:29229748-29231352 (-) // 24.05 // p11.2    |
| 239383_at    |                                             | 2.014733  | 1.0105886 | 2.014733 up  | chr1:145660817-145661277 (+) // 17.39 // q21.1   |
| 244349_at    |                                             | 2.0144765 | 1.0104051 | 2.0144765 up | chr1:151590906-151591490 (+) // 90.54 // q21.3   |
| 215628_x_at  |                                             | 2.014474  | 1.0104032 | 2.014474 up  | chr5:133550929-133553514 (-) // 47.66 // q31.1   |
| 239633_at    |                                             | 2.0142643 | 1.0102531 | 2.0142643 up | chr16:67476371-67476828 (-) // 94.09 // q22.1    |
| 1570408_at   |                                             | 2.0139358 | 1.0100176 | 2.0139358 up | chr13:99188632-99190507 (-) // 69.42 // q32.2    |
| 211437_at    |                                             | 2.0137722 | 1.0099006 | 2.0137722 up | chr6:161499122-161500266 (-) // 49.01 // q26     |
| 1568941_a_at | <i>HNRNPC</i>                               | 2.0133803 | 1.0096197 | 2.0133803 up | chr14:21736028-21737069 (-) // 87.43 // q11.2    |
| 235985_at    |                                             | 2.0126624 | 1.0091052 | 2.0126624 up | chr22:28305197-28305799 (-) // 23.56 // q12.1    |
| 244312_at    |                                             | 2.012584  | 1.009049  | 2.012584 up  | chr2:64772010-64772704 (+) // 54.72 // p14       |
| 242961_x_at  | <i>DDX58</i>                                | 2.0125496 | 1.0090244 | 2.0125496 up | chr9:32455300-32455774 (-) // 31.24 // p21.1     |
| 230827_at    |                                             | 2.012358  | 1.0088869 | 2.012358 up  | chr1:171558243-171558923 (-) // 92.39 // q24.3   |
| 227517_s_at  | <i>GAS5</i> /// <i>SNORD44</i> /// <i>3</i> | 2.0122194 | 1.0087876 | 2.0122194 up | chr1:173833038-173835936 (-) // 76.32 // q25.1   |

|             |                         |           |           |              |                                                  |
|-------------|-------------------------|-----------|-----------|--------------|--------------------------------------------------|
| 239486_at   |                         | 2.0118597 | 1.0085297 | 2.0118597 up | chr2:61152082-61152737 (+) // 91.54 // p16.1     |
| 1560937_at  | <i>RSU1</i>             | 2.011552  | 1.0083091 | 2.011552 up  | chr10:16762263-16764833 (-) // 60.87 // p13      |
| 243031_at   |                         | 2.010914  | 1.0078514 | 2.010914 up  | chr2:55206997-55208062 (-) // 98.6 // p16.1      |
|             |                         |           |           |              | chr16:29127724-29128036 (+) // 98.42 //          |
|             |                         |           |           |              | p11.2//chr16:88017942-88018255 (+) // 96.21 //   |
|             |                         |           |           |              | q24.2                                            |
| 243124_at   | <i>RRN3P2</i>           | 2.0108747 | 1.0078232 | 2.0108747 up |                                                  |
| 1561813_at  | <i>OTTHUMG00000173</i>  | 2.0101945 | 1.0073351 | 2.0101945 up |                                                  |
| 243838_at   |                         | 2.0096018 | 1.0069096 | 2.0096018 up | chr12:111905215-111905950 (+) // 92.11 // q24.12 |
| 239661_at   |                         | 2.0093312 | 1.0067154 | 2.0093312 up | chr4:87950839-87951286 (+) // 99.78 // q21.3     |
| 225093_at   | <i>UTRN</i>             | 2.0089326 | 1.0064292 | 2.0089326 up | chr6:145161912-145174168 (+) // 99.3 // q24.2    |
| 1563113_at  | <i>UBR4</i>             | 2.0084884 | 1.0061101 | 2.0084884 up | chr1:19535917-19536750 (-) // 82.68 // p36.13    |
| 214405_at   |                         | 2.0081892 | 1.0058953 | 2.0081892 up | chr10:11318419-11320073 (+) // 98.27 // p14      |
| 1556924_at  | <i>CFLAR-AS1</i>        | 2.008053  | 1.0057974 | 2.008053 up  | chr2:202005006-202018647 (-) // 88.26 // q33.1   |
| 1562681_at  | <i>KRTAP5-AS1</i>       | 2.007986  | 1.0057492 | 2.007986 up  | chr11:1618476-1620209 (+) // 75.73 // p15.5      |
| 242024_at   |                         | 2.0078182 | 1.0056287 | 2.0078182 up | chr7:139056799-139057756 (+) // 70.33 // q34     |
| 215585_at   |                         | 2.007617  | 1.0054841 | 2.007617 up  | chr16:71952814-71961302 (+) // 16.0 // q22.2     |
| 232348_at   | <i>C18orf8</i>          | 2.0074146 | 1.0053385 | 2.0074146 up | chr18:21103366-21107187 (-) // 61.53 // q11.2    |
| 222306_at   |                         | 2.0071235 | 1.0051293 | 2.0071235 up | chr3:28287079-28287676 (+) // 68.06 // p24.1     |
| 1556947_at  |                         | 2.0069292 | 1.0049897 | 2.0069292 up | chr9:134887351-134889585 (-) // 53.26 // q34.13  |
| 214016_s_at | <i>LOC100996496//SF</i> | 2.0067534 | 1.0048634 | 2.0067534 up | chr1:35641980-35656157 (-) // 89.71 // p34.3     |
| 1569601_at  |                         | 2.0066497 | 1.0047888 | 2.0066497 up | chr2:44622448-44623515 (+) // 23.83 // p21       |
| 224654_at   | <i>DDX21</i>            | 2.006431  | 1.0046316 | 2.006431 up  | chr10:70743391-70744824 (+) // 96.23 // q22.1    |
| 227260_at   |                         | 2.0060506 | 1.004358  | 2.0060506 up | chr13:111545524-111546750 (+) // 96.23 // q34    |
| 243559_at   |                         | 2.0055223 | 1.003978  | 2.0055223 up | chr3:125085394-125086044 (-) // 54.18 // q21.2   |
| 244791_at   |                         | 2.0048687 | 1.0035079 | 2.0048687 up | chr13:99917925-99918659 (+) // 70.59 // q32.3    |
| 241618_at   |                         | 2.004844  | 1.00349   | 2.004844 up  | chr11:65846774-65846963 (+) // 87.83 // q13.1    |
| 238256_at   |                         | 2.0046453 | 1.003347  | 2.0046453 up | chr4:170540636-170541110 (-) // 74.85 // q33     |
| 233656_s_at | <i>VPS54</i>            | 2.0038595 | 1.0027814 | 2.0038595 up | chr2:64120205-64147064 (-) // 98.16 // p14       |
| 210969_at   | <i>PKN2</i>             | 2.0035744 | 1.002576  | 2.0035744 up | chr1:89150233-89271951 (+) // 93.93 // p22.2     |
| 203241_at   | <i>UVRAG</i>            | 2.0034816 | 1.0025094 | 2.0034816 up | chr11:75526275-75853694 (+) // 98.03 // q13.5    |
| 223946_at   | <i>MED23</i>            | 2.0030448 | 1.0021946 | 2.0030448 up | chr6:131895105-131949345 (-) // 99.57 // q23.2   |
| 214048_at   | <i>MBD4</i>             | 2.0026937 | 1.0019417 | 2.0026937 up | chr3:129150116-129151347 (-) // 78.66 // q21.3   |
| 238796_at   |                         | 2.0018816 | 1.0013566 | 2.0018816 up | chr4:69184625-69185562 (-) // 99.04 // q13.2     |
| 238277_at   |                         | 2.001785  | 1.001287  | 2.001785 up  | chr8:9505987-9506454 (+) // 35.03 // p23.1       |

|              |                 |           |            |           |    |                                                |
|--------------|-----------------|-----------|------------|-----------|----|------------------------------------------------|
| 236368_at    | <i>KIAA0368</i> | 2.0017564 | 1.0012664  | 2.0017564 | up | chr9:114126072-114126534 (-) // 93.42 // q31.3 |
| 1568926_x_at | <i>MYLK3</i>    | 2.001506  | 1.001086   | 2.001506  | up | chr16:46759620-46772049 (-) // 56.07 // q11.2  |
| 1569676_at   | <i>TOR1AIP2</i> | 2.0014765 | 1.0010647  | 2.0014765 | up | chr1:179836404-179846917 (-) // 29.07 // q25.2 |
| 202815_s_at  | <i>HEXIM1</i>   | 2.0010948 | 1.0007895  | 2.0010948 | up | chr17:43225868-43229463 (+) // 90.48 // q21.31 |
| 1552867_at   |                 | 2.0008187 | 1.0005904  | 2.0008187 | up | chr13:20618210-20619189 (+) // 14.18 // q12.11 |
| 1560429_at   |                 | 2.0001187 | 1.0000856  | 2.0001187 | up | chr2:148815631-148817701 (-) // 69.6 // q23.1  |
| 217437_s_at  | <i>TACC1</i>    | 1.9118599 | 0.93497676 | 1.9118599 | up | chr8:38677849-38708293 (+) // 93.42 // p11.22  |

B) Low expression genes in *TCF3-ZNF384*-positive ALL in comparison with *ZNF384*-WT ALL

# Notes : DOWN - FC ([*TCF3-ZNF384*] vs [B-others])

#Only down-regulated entities from parent entity list :

#Fold change >= 2.0

#Entity List : Moderated T-Test p (Corr) cut-off = 0.01

#Fold-Change cut-off : 2.0

# Technology : Affymetrix.GeneChip.HG-U133\_Plus\_2

# Created On : Mon Aug 15 11:59:08 JST 2016

| Probe Set ID | Gene Symbol         | FC ([ <i>TCF3-ZNF384</i> ] vs [B-others]) | Log FC ([ <i>TCF3-ZNF384</i> ] vs [B-others]) | FC (abs) ([ <i>TCF3-ZNF384</i> ] vs [B-others]) | Regulation ([ <i>TCF3-ZNF384</i> ] vs [B-others]) | Alignments                                      |
|--------------|---------------------|-------------------------------------------|-----------------------------------------------|-------------------------------------------------|---------------------------------------------------|-------------------------------------------------|
| 203435_s_at  | <i>MME</i>          | -25.400034                                | -4.6667585                                    | 25.400034                                       | down                                              | chr3:154797633-154901492 (+) // 88.53 // q25.2  |
| 203434_s_at  | <i>MME</i>          | -22.437027                                | -4.4878097                                    | 22.437027                                       | down                                              | chr3:154797633-154901492 (+) // 88.06 // q25.2  |
| 204457_s_at  | <i>GAS1</i>         | -15.66089                                 | -3.9690943                                    | 15.66089                                        | down                                              | chr9:89559277-89562104 (-) // 91.58 // q21.33   |
| 226047_at    | <i>MRVI1</i>        | -15.522369                                | -3.956277                                     | 15.522369                                       | down                                              | chr11:10594637-10597325 (-) // 84.12 // p15.4   |
| 206940_s_at  | <i>POU4F1</i>       | -14.096643                                | -3.8172798                                    | 14.096643                                       | down                                              | chr13:79173324-79176836 (-) // 88.55 // q31.1   |
| 244280_at    | <i>LOC100507254</i> | -12.092951                                | -3.5960944                                    | 12.092951                                       | down                                              | chr6:132455550-132490502 (+) // 98.23 // q23.2  |
| 206413_s_at  | <i>TCL1B</i>        | -11.52972                                 | -3.5272856                                    | 11.52972                                        | down                                              | chr14:96152777-96158965 (+) // 97.74 // q32.13  |
| 239964_at    | <i>TCL6</i>         | -10.771647                                | -3.429167                                     | 10.771647                                       | down                                              | chr14:96136151-96136750 (+) // 65.67 // q32.13  |
| 213880_at    | <i>LGR5</i>         | -9.355286                                 | -3.2257817                                    | 9.355286                                        | down                                              | chr12:71978761-71980086 (+) // 98.66 // q21.1   |
| 209781_s_at  | <i>KHDRBS3</i>      | -8.648516                                 | -3.1124525                                    | 8.648516                                        | down                                              | chr8:136469759-136659485 (+) // 91.46 // q24.23 |
| 1559221_at   | <i>LOC100507254</i> | -8.503304                                 | -3.0880234                                    | 8.503304                                        | down                                              | chr6:132455117-132468196 (+) // 72.8 // q23.2   |

|             |                         |            |            |           |      |                                                  |
|-------------|-------------------------|------------|------------|-----------|------|--------------------------------------------------|
| 204321_at   | <i>NEO1</i>             | -8.362439  | -3.0639238 | 8.362439  | down | chr15:73344874-73595782 (+) // 97.7 // q24.1     |
| 235310_at   | <i>GCSAM</i>            | -8.298502  | -3.052851  | 8.298502  | down | chr3:111841065-111852084 (-) // 77.15 // q13.2   |
| 238477_at   | <i>KIF1C</i>            | -8.275816  | -3.0489016 | 8.275816  | down | chr17:4930676-4931696 (+) // 44.55 // p13.2      |
| 39318_at    | <i>TCL1A</i>            | -7.9211226 | -2.985705  | 7.9211226 | down | chr14:96176303-96180450 (-) // 98.02 // q32.13   |
| 200923_at   | <i>LGALS3BP</i>         | -7.6893926 | -2.9428697 | 7.6893926 | down | chr17:76967336-76976061 (-) // 99.91 // q25.3    |
| 238674_at   |                         | -7.6880255 | -2.9426131 | 7.6880255 | down | chr14:107167628-107168721 (-) // 98.37 // q32.33 |
| 210450_at   | <i>IGHV5-78</i>         | -7.5135646 | -2.9094975 | 7.5135646 | down | chr14:107258712-107259792 (-) // 93.79 // q32.33 |
| 209995_s_at | <i>TCL1A</i>            | -7.4811745 | -2.9032648 | 7.4811745 | down | chr14:96176394-96180445 (-) // 98.46 // q32.13   |
| 226244_at   | <i>CLEC14A</i>          | -7.4575286 | -2.8986976 | 7.4575286 | down | chr14:38723314-38724524 (-) // 92.12 // q21.1    |
| 239575_at   | <i>OPALIN</i>           | -7.4296737 | -2.8932989 | 7.4296737 | down | chr10:98102977-98103651 (-) // 71.88 // q24.1    |
| 219218_at   | <i>BAHCC1</i>           | -7.3995967 | -2.8874466 | 7.3995967 | down | chr17:79431356-79433351 (+) // 98.57 // q25.3    |
| 238029_s_at | <i>SLC16A14</i>         | -7.1976733 | -2.8475306 | 7.1976733 | down | chr2:230899690-230900173 (-) // 96.41 // q36.3   |
| 214643_x_at | <i>BIN1</i>             | -7.0437016 | -2.8163338 | 7.0437016 | down | chr2:127805669-127864519 (-) // 94.85 // q14.3   |
| 202052_s_at | <i>RAI14</i>            | -7.008574  | -2.809121  | 7.008574  | down | chr5:34656517-34832716 (+) // 98.13 // p13.2     |
| 215894_at   | <i>PTGDR</i>            | -6.8963356 | -2.78583   | 6.8963356 | down | chr14:52735176-52741741 (+) // 100.0 // q22.1    |
| 225016_at   | <i>APCDD1</i>           | -6.8324943 | -2.7724123 | 6.8324943 | down | chr18:10454647-10488698 (+) // 95.03 // p11.22   |
| 244210_at   | <i>CTC-436K13.5//OT</i> | -6.701269  | -2.7444344 | 6.701269  | down | chr5:157600608-157600814 (-) // 79.33 // q33.3   |
| 1554732_at  | <i>LOC728175</i>        | -6.57491   | -2.7169712 | 6.57491   | down | chr4:185261995-185275130 (-) // 37.43 // q35.1   |
| 228281_at   | <i>C11orf82</i>         | -6.523123  | -2.7055628 | 6.523123  | down | chr11:82644381-82645697 (+) // 96.02 // q14.1    |
| 229902_at   | <i>FLT4</i>             | -6.500187  | -2.7004812 | 6.500187  | down | chr5:180028506-180029040 (-) // 84.7 // q35.3    |
| 210948_s_at | <i>LEF1</i>             | -6.417779  | -2.682074  | 6.417779  | down | chr4:108984784-109088923 (-) // 99.61 // q25     |
| 227856_at   | <i>C4orf32</i>          | -6.385544  | -2.6748095 | 6.385544  | down | chr4:113109286-113110237 (+) // 95.63 // q25     |
| 201689_s_at | <i>TPD52</i>            | -6.384191  | -2.6745038 | 6.384191  | down | chr8:80947571-81083777 (-) // 97.78 // q21.13    |
| 202733_at   | <i>P4HA2</i>            | -6.3088393 | -2.6573746 | 6.3088393 | down | chr5:131528302-131562559 (-) // 98.81 // q31.1   |
| 225019_at   | <i>CAMK2D</i>           | -6.3052154 | -2.6565456 | 6.3052154 | down | chr4:114373569-114683202 (-) // 88.24 // q26     |
| 206574_s_at | <i>PTP4A3</i>           | -6.3029423 | -2.6560254 | 6.3029423 | down | chr8:142432103-142441394 (+) // 99.01 // q24.3   |
| 221349_at   | <i>VPREB1</i>           | -6.259837  | -2.646125  | 6.259837  | down | chr22:22599225-22599749 (+) // 90.41 // q11.22   |
| 1552691_at  | <i>ARL11</i>            | -6.247752  | -2.6433372 | 6.247752  | down | chr13:50202623-50207731 (+) // 66.55 // q14.2    |



|              |                     |            |            |           |      |                                                  |
|--------------|---------------------|------------|------------|-----------|------|--------------------------------------------------|
| 1556472_s_at | <i>SCML4</i>        | -6.187124  | -2.629269  | 6.187124  | down | chr6:108025307-108145521 (-) // 99.58 // q21     |
| 219840_s_at  | <i>TCL6</i>         | -6.0512114 | -2.597224  | 6.0512114 | down | chr14:96131198-96135702 (+) // 77.11 // q32.13   |
| 240915_at    | <i>IGHV1-69</i>     | -5.952241  | -2.573433  | 5.952241  | down | chr14:107169512-107169902 (-) // 57.36 // q32.33 |
| 221557_s_at  | <i>LEF1</i>         | -5.936596  | -2.5696359 | 5.936596  | down | chr4:108968703-109089635 (-) // 95.79 // q25     |
| 1554789_a_at | <i>PDE8B</i>        | -5.832753  | -2.544177  | 5.832753  | down | chr5:76506750-76722458 (+) // 98.7 // q13.3      |
| 224325_at    | <i>FZD8</i>         | -5.798871  | -2.535772  | 5.798871  | down | chr10:35927176-35930362 (-) // 86.7 // p11.21    |
| 1559315_s_at | <i>SOCS2-AS1</i>    | -5.736892  | -2.5202694 | 5.736892  | down | chr12:93936239-93965628 (-) // 29.03 // q22      |
| 224770_s_at  | <i>NAV1</i>         | -5.7359705 | -2.5200377 | 5.7359705 | down | chr1:201755568-201794455 (+) // 95.64 // q32.1   |
| 202342_s_at  | <i>TRIM2</i>        | -5.716029  | -2.5150132 | 5.716029  | down | chr4:154125617-154260474 (+) // 97.67 // q31.3   |
| 49306_at     | <i>RASSF4</i>       | -5.6849957 | -2.5071592 | 5.6849957 | down | chr10:45479507-45487452 (+) // 74.7 // q11.21    |
| 209183_s_at  | <i>C10orf10</i>     | -5.5797586 | -2.4802027 | 5.5797586 | down | chr10:45471710-45474257 (-) // 92.88 // q11.21   |
| 215621_s_at  | <i>IGHD</i>         | -5.4780297 | -2.4536572 | 5.4780297 | down | chr14:106311786-106725679 (-) // 89.24 // q32.33 |
| 231042_s_at  |                     | -5.417756  | -2.4376955 | 5.417756  | down | chr4:114374777-114375242 (+) // 76.14 // q26     |
| 203769_s_at  | <i>STS</i>          | -5.3734164 | -2.4258397 | 5.3734164 | down | chrX:7137496-7272851 (+) // 89.0 // p22.31       |
| 222085_at    | <i>FAM174B</i>      | -5.3543696 | -2.4207168 | 5.3543696 | down | chr15:93160682-93161550 (+) // 97.35 // q26.1    |
| 203585_at    | <i>ZNF185</i>       | -5.326229  | -2.4131145 | 5.326229  | down | chrX:152086664-152142005 (+) // 91.28 // q28     |
| 217414_x_at  | <i>HBA1///HBA2</i>  | -5.2800226 | -2.4005442 | 5.2800226 | down | chr16:222874-223709 (+) // 99.44 // p13.3        |
| 204760_s_at  | <i>NR1D1///THRA</i> | -5.2711573 | -2.3981197 | 5.2711573 | down | chr17:38249040-38256973 (-) // 98.19 // q21.1    |
| 218935_at    | <i>EHD3</i>         | -5.269181  | -2.3975787 | 5.269181  | down | chr2:31457202-31491260 (+) // 92.94 // p23.1     |
| 218949_s_at  | <i>QRSL1</i>        | -5.257859  | -2.3944755 | 5.257859  | down | chr6:107077458-107114235 (+) // 84.73 // q21     |
| 201710_at    | <i>MYBL2</i>        | -5.1921587 | -2.3763344 | 5.1921587 | down | chr20:42302444-42345124 (+) // 94.4 // q13.12    |
| 202407_s_at  | <i>PRPF31</i>       | -5.1915846 | -2.376175  | 5.1915846 | down | chr19:54618852-54635144 (+) // 94.55 // q13.42   |
| 208302_at    | <i>HMHB1</i>        | -5.178345  | -2.3724911 | 5.178345  | down | chr5:143191725-143200282 (+) // 84.38 // q31.3   |
| 241416_at    |                     | -5.14042   | -2.3618863 | 5.14042   | down | chr7:150101543-150102000 (-) // 66.01 // q36.1   |
| 205297_s_at  | <i>CD79B</i>        | -5.084909  | -2.346222  | 5.084909  | down | chr17:62006099-62009714 (-) // 99.84 // q23.3    |
| 220068_at    | <i>VPREB3</i>       | -5.0599413 | -2.3391206 | 5.0599413 | down | chr22:24094933-24096592 (-) // 84.49 // q11.23   |
| 224989_at    |                     | -5.0535064 | -2.3372848 | 5.0535064 | down | chr4:39549837-39640582 (-) // 81.08 // p14       |
| 201690_s_at  | <i>TPD52</i>        | -5.019267  | -2.3274767 | 5.019267  | down | chr8:80947571-81083777 (-) // 97.78 // q21.13    |

|              |                                   |            |            |           |      |                                                  |
|--------------|-----------------------------------|------------|------------|-----------|------|--------------------------------------------------|
| 230399_at    |                                   | -5.015622  | -2.3264287 | 5.015622  | down | chrX:100097904-100098522 (+) // 87.86 // q22.1   |
| 201808_s_at  | <i>ENG</i>                        | -4.992193  | -2.3196738 | 4.992193  | down | chr9:130577294-130616984 (-) // 97.91 // q34.11  |
| 232990_at    | <i>FAM104B</i> /// <i>LOC1010</i> | -4.9761157 | -2.31502   | 4.9761157 | down | chrX:55169659-55172746 (-) // 27.2 // p11.21     |
| 212279_at    | <i>TMEM97</i>                     | -4.9459305 | -2.306242  | 4.9459305 | down | chr17:26646128-26655404 (+) // 84.6 // q11.2     |
| 209151_x_at  | <i>TCF3</i>                       | -4.9392824 | -2.3043015 | 4.9392824 | down | chr19:1609291-1650291 (-) // 94.42 // p13.3      |
| 204152_s_at  | <i>MFNG</i>                       | -4.9349957 | -2.3030488 | 4.9349957 | down | chr22:37865105-37882432 (-) // 89.58 // q13.1    |
| 211141_s_at  | <i>CNOT3</i>                      | -4.876304  | -2.285788  | 4.876304  | down | chr19:54646664-54659445 (+) // 95.66 // q13.42   |
| 223565_at    | <i>MZB1</i>                       | -4.8574796 | -2.2802079 | 4.8574796 | down | chr5:138723183-138725602 (-) // 95.65 // q31.2   |
| 201691_s_at  | <i>TPD52</i>                      | -4.8299947 | -2.2720215 | 4.8299947 | down | chr8:80947748-81083769 (-) // 99.26 // q21.13    |
| 1559072_a_at | <i>ELFN2</i>                      | -4.812937  | -2.2669175 | 4.812937  | down | chr22:37763999-37771579 (-) // 93.56 // q13.1    |
| 235099_at    | <i>CMTM8</i>                      | -4.7690816 | -2.2537115 | 4.7690816 | down | chr3:32398903-32411811 (+) // 98.85 // p22.3     |
| 242943_at    | <i>ST8SIA4</i>                    | -4.7196875 | -2.2386913 | 4.7196875 | down | chr5:100146174-100146870 (-) // 57.77 // q21.1   |
| 209101_at    | <i>CTGF</i>                       | -4.713614  | -2.2368336 | 4.713614  | down | chr6:132269505-132272442 (-) // 92.1 // q23.2    |
| 226160_at    | <i>H6PD</i>                       | -4.6998463 | -2.2326136 | 4.6998463 | down | chr1:9325177-9331392 (+) // 71.76 // p36.22      |
| 1569225_a_at | <i>SCML4</i>                      | -4.680527  | -2.226671  | 4.680527  | down | chr6:108025874-108053600 (-) // 94.28 // q21     |
| 220320_at    | <i>DOK3</i>                       | -4.6508956 | -2.2175086 | 4.6508956 | down | chr5:176930751-176936853 (-) // 97.67 // q35.3   |
| 218948_at    | <i>QRSL1</i>                      | -4.64726   | -2.2163804 | 4.64726   | down | chr6:107077452-107115410 (+) // 75.55 // q21     |
| 238823_at    | <i>FMNL3</i>                      | -4.63326   | -2.2120275 | 4.63326   | down | chr12:50031722-50033098 (-) // 45.48 // q13.12   |
| 213042_s_at  | <i>ATP2A3</i>                     | -4.6330194 | -2.2119527 | 4.6330194 | down | chr17:3827162-3867736 (-) // 97.79 // p13.2      |
| 218864_at    | <i>TNS1</i>                       | -4.632308  | -2.2117312 | 4.632308  | down | chr2:218667503-218669008 (-) // 90.93 // q35     |
| 203757_s_at  | <i>CEACAM6</i>                    | -4.6175423 | -2.2071252 | 4.6175423 | down | chr19:42259506-42275777 (+) // 53.22 // q13.2    |
| 230027_s_at  | <i>MRPL43</i>                     | -4.6060038 | -2.2035155 | 4.6060038 | down | chr10:102741133-102747190 (-) // 87.79 // q24.31 |
| 233831_at    | <i>LOC100291666</i>               | -4.5922604 | -2.1992044 | 4.5922604 | down | chr15:100037699-100038580 (-) // 63.45 // q26.3  |
| 225688_s_at  | <i>PHLDB2</i>                     | -4.592155  | -2.1991713 | 4.592155  | down | chr3:111667804-111695136 (+) // 95.89 // q13.2   |
| 203146_s_at  | <i>GABBR1</i>                     | -4.591868  | -2.1990812 | 4.591868  | down | chr6:29570005-29600860 (-) // 95.91 // p22.1     |
| 204287_at    | <i>SYNGR1</i>                     | -4.590877  | -2.1987698 | 4.590877  | down | chr22:39746015-39781580 (+) // 87.7 // q13.1     |
| 222134_at    | <i>DDO</i>                        | -4.5658226 | -2.1908748 | 4.5658226 | down | chr6:110712973-110736765 (-) // 90.23 // q21     |
| 225877_at    | <i>TYSND1</i>                     | -4.5581245 | -2.1884403 | 4.5581245 | down | chr10:71898963-71906472 (-) // 94.6 // q22.1     |

|              |                       |            |            |           |      |                                                  |
|--------------|-----------------------|------------|------------|-----------|------|--------------------------------------------------|
| 1555779_a_at | <i>CD79A</i>          | -4.5418715 | -2.183287  | 4.5418715 | down | chr19:42381361-42385143 (+) // 92.73 // q13.2    |
| 222007_s_at  | <i>FKBP8</i>          | -4.535439  | -2.1812422 | 4.535439  | down | chr19:18650242-18654364 (+) // 86.86 // p13.11   |
| 206660_at    | <i>IGLL1</i>          | -4.496811  | -2.1689022 | 4.496811  | down | chr22:23915363-23922495 (-) // 99.88 // q11.23   |
| 1553423_a_at | <i>SLFN13</i>         | -4.4909697 | -2.167027  | 4.4909697 | down | chr17:33766493-33775783 (-) // 78.16 // q12      |
| 229079_at    | <i>EHMT2</i>          | -4.4695563 | -2.1601317 | 4.4695563 | down | chr6:31860623-31864768 (+) // 97.27 // p21.33    |
| 32836_at     | <i>AGPAT1</i>         | -4.448859  | -2.1534355 | 4.448859  | down | chr6:32135989-32143893 (-) // 94.89 // p21.32    |
| 204849_at    | <i>DPH3P1///TCFL5</i> | -4.417525  | -2.1432383 | 4.417525  | down | chr20:61472467-61492976 (-) // 91.75 // q13.33   |
| 227336_at    | <i>DTX1</i>           | -4.402392  | -2.1382875 | 4.402392  | down | chr12:113495494-113535830 (+) // 91.82 // q24.13 |
| 224626_at    | <i>SLC35A4</i>        | -4.398949  | -2.1371589 | 4.398949  | down | chr5:139944060-139948802 (+) // 98.55 // q31.3   |
| 229196_at    | <i>FAM111A</i>        | -4.396523  | -2.136363  | 4.396523  | down | chr11:58911912-58912428 (+) // 94.38 // q12.1    |
| 230214_at    | <i>MRVI1</i>          | -4.3565903 | -2.1231995 | 4.3565903 | down | chr11:10597306-10597872 (-) // 97.41 // p15.4    |
| 213358_at    | <i>SOGA2</i>          | -4.342548  | -2.1185417 | 4.342548  | down | chr18:8783685-8832776 (+) // 96.73 // p11.22     |
| 227193_at    | <i>SLC30A4</i>        | -4.320259  | -2.1111178 | 4.320259  | down | chr15:45771808-45773274 (-) // 97.9 // q21.1     |
| 226530_at    | <i>BMF</i>            | -4.3157463 | -2.10961   | 4.3157463 | down | chr15:40380090-40398649 (-) // 92.52 // q15.1    |
| 202931_x_at  | <i>BIN1</i>           | -4.292871  | -2.1019428 | 4.292871  | down | chr2:127805602-127864565 (-) // 97.5 // q14.3    |
| 217025_s_at  | <i>DBN1</i>           | -4.279363  | -2.0973961 | 4.279363  | down | chr5:176884232-176900199 (-) // 94.18 // q35.3   |
| 211884_s_at  | <i>CIITA</i>          | -4.270583  | -2.094433  | 4.270583  | down | chr16:10971187-11004100 (+) // 99.91 // p13.13   |
| 224774_s_at  | <i>NAV1</i>           | -4.2695684 | -2.0940902 | 4.2695684 | down | chr1:201755568-201794455 (+) // 95.64 // q32.1   |
| 1558217_at   | <i>SLFN13</i>         | -4.2621846 | -2.091593  | 4.2621846 | down | chr17:33766002-33774435 (-) // 75.62 // q12      |
| 222614_at    | <i>RWDD2B</i>         | -4.2570057 | -2.089839  | 4.2570057 | down | chr21:30377994-30391692 (+) // 92.93 // q21.3    |
| 204819_at    | <i>FGD1</i>           | -4.252094  | -2.0881734 | 4.252094  | down | chrX:54471893-54522599 (-) // 92.26 // p11.22    |
| 224771_at    | <i>NAV1</i>           | -4.238264  | -2.0834734 | 4.238264  | down | chr1:201755568-201794455 (+) // 95.64 // q32.1   |
| 1566647_s_at | <i>LOC149086</i>      | -4.22983   | -2.0805995 | 4.22983   | down | chr1:31971896-31974166 (+) // 49.91 // p35.2     |
| 207894_s_at  | <i>TCL6</i>           | -4.182645  | -2.0644155 | 4.182645  | down | chr14:96129592-96139789 (+) // 62.43 // q32.13   |
| 204857_at    | <i>MAD1L1</i>         | -4.179258  | -2.0632467 | 4.179258  | down | chr7:1855433-2270273 (-) // 93.25 // p22.3       |
| 204896_s_at  | <i>PTGER4</i>         | -4.1771574 | -2.0625215 | 4.1771574 | down | chr5:40680038-40693837 (+) // 98.19 // p13.1     |
| 227940_at    | <i>LOC339803</i>      | -4.1658874 | -2.0586238 | 4.1658874 | down | chr2:61368731-61372085 (-) // 41.15 // p15       |
| 243452_at    | <i>LOC646778</i>      | -4.16048   | -2.05675   | 4.16048   | down | chr18:29266189-29267276 (+) // 75.62 // q12.1    |

|             |                          |            |            |           |      |                                                                                               |
|-------------|--------------------------|------------|------------|-----------|------|-----------------------------------------------------------------------------------------------|
| 203264_s_at | <i>ARHGEF9</i>           | -4.1406174 | -2.049846  | 4.1406174 | down | chrX:62854847-62974993 (-) // 97.65 // q11.1                                                  |
| 219179_at   | <i>DACT1</i>             | -4.1294665 | -2.0459554 | 4.1294665 | down | chr14:59112081-59115036 (+) // 99.09 // q23.1                                                 |
| 205821_at   | <i>KLRC4-KLRK1///KLF</i> | -4.105944  | -2.037714  | 4.105944  | down | chr12:10524952-10560365 (-) // 58.64 // p13.2                                                 |
| 207199_at   | <i>TERT</i>              | -4.1037197 | -2.0369322 | 4.1037197 | down | chr5:1253288-1295159 (-) // 98.73 // p15.33                                                   |
| 202094_at   | <i>BIRC5</i>             | -4.1025515 | -2.0365214 | 4.1025515 | down | chr17:76210322-76221715 (+) // 95.94 // q25.3                                                 |
|             |                          |            |            |           |      | chr15:28983632-29002553 (+) // 56.81 // q13.1///chr15:23188676-23207962 (-) // 57.59 // q11.2 |
| 1557261_at  | <i>WHAMMP2///WHAMM</i>   | -4.079225  | -2.028295  | 4.079225  | down | chr16:226678-227520 (+) // 99.83 // p13.3                                                     |
| 204018_x_at | <i>HBA1///HBA2</i>       | -4.0664434 | -2.0237675 | 4.0664434 | down | chr2:127805906-127864540 (-) // 98.55 // q14.3                                                |
| 210202_s_at | <i>BIN1</i>              | -4.0576506 | -2.0206447 | 4.0576506 | down | chrX:69664818-69722533 (+) // 96.03 // q13.1                                                  |
| 207732_s_at | <i>DLG3</i>              | -4.0561333 | -2.0201051 | 4.0561333 | down | chr1:201755568-201794455 (+) // 95.64 // q32.1                                                |
| 224773_at   | <i>NAV1</i>              | -4.04544   | -2.0162966 | 4.04544   | down | chr22:46435788-46439944 (-) // 72.83 // q13.31                                                |
| 232088_x_at | <i>LINC00899</i>         | -4.0350137 | -2.0125735 | 4.0350137 | down | chr12:69139962-69159844 (+) // 72.5 // q15                                                    |
| 218988_at   | <i>SLC35E3</i>           | -4.021035  | -2.007567  | 4.021035  | down | chr6:43544016-43582419 (+) // 100.0 // p21.1                                                  |
| 222879_s_at | <i>POLH</i>              | -4.0124135 | -2.0044703 | 4.0124135 | down | chr11:66052051-66056572 (-) // 97.12 // q13.2                                                 |
| 202418_at   | <i>YIF1A</i>             | -3.9993541 | -1.9997671 | 3.9993541 | down | chr11:67273968-67275656 (-) // 99.89 // q13.2                                                 |
| 203252_at   | <i>CDK2AP2</i>           | -3.9988127 | -1.9995717 | 3.9988127 | down | chr3:129274056-129325661 (-) // 92.63 // q22.1                                                |
| 212235_at   | <i>PLXND1</i>            | -3.989356  | -1.9961559 | 3.989356  | down | chr15:43812837-43823817 (+) // 97.18 // q15.3                                                 |
| 203151_at   | <i>MAP1A</i>             | -3.98771   | -1.9955605 | 3.98771   | down | chr1:36931694-36948500 (-) // 97.89 // p34.3                                                  |
| 203591_s_at | <i>CSF3R</i>             | -3.9832382 | -1.9939418 | 3.9832382 | down | chr19:42381338-42385438 (+) // 99.91 // q13.2                                                 |
| 205049_s_at | <i>CD79A</i>             | -3.9761107 | -1.9913579 | 3.9761107 | down | chr4:38797936-38806412 (-) // 99.07 // p14                                                    |
| 210176_at   | <i>TLR1</i>              | -3.9694374 | -1.9889345 | 3.9694374 | down | chr7:143554165-143599219 (-) // 98.44 // q35                                                  |
| 210529_s_at | <i>FAM115A///LOC1002</i> | -3.9674642 | -1.9882172 | 3.9674642 | down | chr7:50366974-50468325 (+) // 97.04 // p12.2                                                  |
| 216901_s_at | <i>IKZF1</i>             | -3.9660866 | -1.9877162 | 3.9660866 | down | chr18:46446223-46477081 (-) // 87.34 // q21.1                                                 |
| 204790_at   | <i>SMAD7</i>             | -3.9528117 | -1.9828793 | 3.9528117 | down | chr5:76723250-76724598 (+) // 96.55 // q13.3                                                  |
| 235115_at   | <i>PDE8B</i>             | -3.942949  | -1.9792751 | 3.942949  | down | chr3:66429221-66551351 (-) // 97.86 // p14.1                                                  |
| 211596_s_at | <i>LRIG1</i>             | -3.9359808 | -1.9767232 | 3.9359808 | down | chr17:33677330-33680006 (-) // 68.21 // q12                                                   |
| 226743_at   | <i>SLFN11</i>            | -3.9235377 | -1.9721551 | 3.9235377 | down | chr2:127805611-127864690 (-) // 98.06 // q14.3                                                |
| 210201_x_at | <i>BIN1</i>              | -3.918533  | -1.9703137 | 3.918533  | down |                                                                                               |

|              |                           |            |            |           |      |                                                                                                                                                    |
|--------------|---------------------------|------------|------------|-----------|------|----------------------------------------------------------------------------------------------------------------------------------------------------|
| 1564940_at   |                           | -3.9056902 | -1.9655775 | 3.9056902 | down |                                                                                                                                                    |
| 1557919_a_at | <i>ERVH-3</i>             | -3.8985817 | -1.9629494 | 3.8985817 | down | chr6:68598071-68599395 (-) // 10.74 // q12                                                                                                         |
| 229167_at    | <i>PURA</i>               | -3.8946128 | -1.9614799 | 3.8946128 | down | chr5:139498177-139499001 (+) // 74.97 // q31.2                                                                                                     |
| 238141_s_at  | <i>LOC100996246</i>       | -3.8922427 | -1.9606017 | 3.8922427 | down | chr12:132671280-132671746 (-) // 96.48 // q24.33                                                                                                   |
| 243362_s_at  | <i>LEF1-AS1</i>           | -3.89066   | -1.9600149 | 3.89066   | down | chr4:109096864-109097582 (+) // 94.35 // q25                                                                                                       |
| 1564356_at   | <i>ZNF568</i>             | -3.8863103 | -1.9584011 | 3.8863103 | down | chr19:37407356-37441838 (+) // 98.43 // q13.12                                                                                                     |
| 209279_s_at  | <i>NSDHL</i>              | -3.8795068 | -1.9558733 | 3.8795068 | down | chrX:151999589-152037749 (+) // 98.59 // q28                                                                                                       |
| 215253_s_at  | <i>RCAN1</i>              | -3.864903  | -1.9504322 | 3.864903  | down | chr21:35893369-35895562 (-) // 99.01 // q22.12                                                                                                     |
| 203260_at    | <i>HDDC2</i>              | -3.8597975 | -1.9485252 | 3.8597975 | down | chr6:125596495-125623130 (-) // 98.18 // q22.31                                                                                                    |
| 219930_at    | <i>KLF8</i>               | -3.8563504 | -1.9472362 | 3.8563504 | down | chrX:56259331-56311654 (+) // 87.12 // p11.21                                                                                                      |
| 224994_at    | <i>CAMK2D</i>             | -3.8557444 | -1.9470094 | 3.8557444 | down | chr4:114373569-114683202 (-) // 88.24 // q26<br>chr17:61994562-61996198 (-) // 99.81 //<br>q23.3//chr17:61957574-61959223 (-) // 96.46 //<br>q23.3 |
| 208069_x_at  | <i>CSH1///CSHL1///GI</i>  | -3.8556774 | -1.9469843 | 3.8556774 | down |                                                                                                                                                    |
| 232950_s_at  | <i>PITPNM2</i>            | -3.8515277 | -1.9454308 | 3.8515277 | down | chr12:123468027-123485692 (-) // 98.79 // q24.31                                                                                                   |
| 209772_s_at  | <i>CD24</i>               | -3.8510258 | -1.9452428 | 3.8510258 | down | chrY:21154234-21154652 (-) // 98.33 // q11.222                                                                                                     |
| 228555_at    | <i>CAMK2D</i>             | -3.8398306 | -1.9410427 | 3.8398306 | down | chr4:114372189-114373421 (-) // 43.5 // q26                                                                                                        |
| 231130_at    | <i>FKBP7</i>              | -3.8341987 | -1.9389251 | 3.8341987 | down | chr2:179328392-179328873 (-) // 93.47 // q31.2                                                                                                     |
| 239180_at    | <i>LOC100507419</i>       | -3.8120003 | -1.9305482 | 3.8120003 | down | chr16:3104855-3106020 (-) // 92.42 // p13.3                                                                                                        |
| 204458_at    | <i>PLA2G15</i>            | -3.807309  | -1.9287716 | 3.807309  | down | chr16:68279275-68294961 (+) // 97.22 // q22.1                                                                                                      |
| 207826_s_at  | <i>ID3</i>                | -3.8027666 | -1.9270494 | 3.8027666 | down | chr1:23884431-23885969 (-) // 92.46 // p36.12                                                                                                      |
| 203767_s_at  | <i>STS</i>                | -3.7877388 | -1.9213369 | 3.7877388 | down | chrX:7137496-7272851 (+) // 88.85 // p22.31                                                                                                        |
| 223318_s_at  | <i>ALKBH7</i>             | -3.7855966 | -1.9205207 | 3.7855966 | down | chr19:6372788-6375040 (+) // 96.11 // p13.3                                                                                                        |
| 1552364_s_at | <i>MSI2</i>               | -3.780541  | -1.9185927 | 3.780541  | down | chr17:55333894-55757695 (+) // 95.65 // q22                                                                                                        |
| 220240_s_at  | <i>TMCO3</i>              | -3.768688  | -1.9140624 | 3.768688  | down | chr13:114145410-114188664 (+) // 96.67 // q34                                                                                                      |
| 213228_at    | <i>PDE8B</i>              | -3.7518256 | -1.9075928 | 3.7518256 | down | chr5:76627254-76723226 (+) // 99.19 // q13.3                                                                                                       |
| 228586_at    |                           | -3.7470438 | -1.9057529 | 3.7470438 | down | chr9:130581076-130588076 (+) // 98.06 // q34.11                                                                                                    |
| 229205_at    | <i>CTD-3064H18.1///O1</i> | -3.7468262 | -1.9056691 | 3.7468262 | down | chr19:37988068-37988494 (-) // 47.11 // q13.12                                                                                                     |
| 228179_at    | <i>CIRH1A///HAS3</i>      | -3.7418609 | -1.9037559 | 3.7418609 | down | chr16:69152171-69166473 (+) // 97.55 // q22.1                                                                                                      |

|              |                           |            |            |           |      |                                                                                             |
|--------------|---------------------------|------------|------------|-----------|------|---------------------------------------------------------------------------------------------|
| 243258_at    | <i>CLUH</i>               | -3.7371054 | -1.9019213 | 3.7371054 | down | chr17:2606640-2614928 (+) // 91.63 // p13.3                                                 |
| 1557128_at   | <i>FAM111B</i>            | -3.7363586 | -1.9016329 | 3.7363586 | down | chr11:58874666-58892476 (+) // 90.65 // q12.1                                               |
| 214439_x_at  | <i>BIN1</i>               | -3.7342162 | -1.9008055 | 3.7342162 | down | chr2:127805618-127864914 (-) // 91.01 // q14.3                                              |
| 211132_at    | <i>INTS3</i>              | -3.727224  | -1.8981016 | 3.727224  | down | chr1:153744846-153746555 (-) // 90.0 // q21.3                                               |
| 207591_s_at  | <i>ARID1A</i>             | -3.7244334 | -1.8970209 | 3.7244334 | down | chr1:27055870-27101392 (+) // 96.93 // p36.11                                               |
| 233142_at    | <i>CTB-175P5.4///OTTI</i> | -3.7239492 | -1.8968334 | 3.7239492 | down | chr19:23060271-23598873 (-) // 9.65 // p12                                                  |
| 1565817_at   | <i>IKZF1</i>              | -3.7161121 | -1.8937941 | 3.7161121 | down | chr7:50348325-50444492 (+) // 92.72 // p12.2                                                |
| 231877_at    | <i>TRMT10A</i>            | -3.71119   | -1.8918818 | 3.71119   | down | chr4:100469033-100485174 (-) // 97.68 // q23                                                |
| 38671_at     | <i>PLXND1</i>             | -3.7099614 | -1.8914042 | 3.7099614 | down | chr3:129274056-129325661 (-) // 87.73 // q22.1                                              |
| 228294_s_at  | <i>ZNF775</i>             | -3.6931071 | -1.8848351 | 3.6931071 | down | chr7:150095088-150095719 (-) // 90.06 // q36.1                                              |
| 207419_s_at  | <i>RAC2</i>               | -3.6874955 | -1.8826413 | 3.6874955 | down | chr22:37622041-37640188 (-) // 77.93 // q13.1                                               |
| 214995_s_at  | <i>APOBEC3F///APOB1</i>   | -3.6864707 | -1.8822403 | 3.6864707 | down | chr22:39436700-39440427 (+) // 77.71 // q13.1                                               |
| 202785_at    | <i>NDUFA7</i>             | -3.6839886 | -1.8812686 | 3.6839886 | down | chr19:8376244-8386266 (-) // 90.02 // p13.2                                                 |
|              |                           |            |            |           |      | chr7:128766471-128767268 (+) // 95.04 // q32.1///chr19:4101021-4123972 (-) // 93.8 // p13.3 |
| 213490_s_at  | <i>MAP2K2</i>             | -3.679216  | -1.8793983 | 3.679216  | down |                                                                                             |
| 1552386_at   | <i>GAPT</i>               | -3.677715  | -1.8788097 | 3.677715  | down | chr5:57787325-57792186 (+) // 65.42 // q11.2                                                |
| 221558_s_at  | <i>LEF1</i>               | -3.6730106 | -1.876963  | 3.6730106 | down | chr4:108968700-109089578 (-) // 96.98 // q25                                                |
| 1552923_a_at | <i>PITPNM2</i>            | -3.666518  | -1.8744106 | 3.666518  | down | chr12:123468980-123519201 (-) // 98.02 // q24.31                                            |
| 221591_s_at  | <i>FAM64A</i>             | -3.6607342 | -1.872133  | 3.6607342 | down | chr17:6347767-6354384 (+) // 93.4 // p13.2                                                  |
| 202688_at    | <i>TNFSF10</i>            | -3.6591558 | -1.8715109 | 3.6591558 | down | chr3:172223464-172241261 (-) // 81.91 // q26.31                                             |
| 208817_at    | <i>COMT</i>               | -3.6586528 | -1.8713125 | 3.6586528 | down | chr22:19929332-19956464 (+) // 92.74 // q11.21                                              |
| 218930_s_at  | <i>TMEM106B</i>           | -3.657934  | -1.871029  | 3.657934  | down | chr7:12250923-12272713 (+) // 98.36 // p21.3                                                |
| 202472_at    | <i>MPI</i>                | -3.6504002 | -1.8680546 | 3.6504002 | down | chr15:75182409-75190565 (+) // 100.0 // q24.1                                               |
| 1552789_at   | <i>SEC62</i>              | -3.6500955 | -1.8679342 | 3.6500955 | down | chr3:169714257-169716160 (+) // 56.28 // q26.2                                              |
| 201367_s_at  | <i>ZFP36L2</i>            | -3.6481166 | -1.8671519 | 3.6481166 | down | chr2:43449544-43453745 (-) // 90.57 // p21                                                  |
| 222931_s_at  | <i>THNSL1</i>             | -3.6465907 | -1.8665483 | 3.6465907 | down | chr10:25313336-25315591 (+) // 88.35 // p12.1                                               |
| 218885_s_at  | <i>GALNT12</i>            | -3.64525   | -1.8660178 | 3.64525   | down | chr9:101585593-101612358 (+) // 98.29 // q22.33                                             |
| 1566301_at   | <i>PPP1R11</i>            | -3.6325128 | -1.8609679 | 3.6325128 | down | chr6:30037303-30037744 (-) // 93.48 // p22.1                                                |

|             |                          |            |            |           |      |                                                  |
|-------------|--------------------------|------------|------------|-----------|------|--------------------------------------------------|
| 235383_at   | <i>MYO7B</i>             | -3.6232684 | -1.8572917 | 3.6232684 | down | chr2:128393375-128395300 (+) // 98.11 // q14.3   |
| 231887_s_at | <i>PALD1</i>             | -3.6218388 | -1.8567224 | 3.6218388 | down | chr10:72289668-72328205 (+) // 94.73 // q22.1    |
| 206885_x_at | <i>GH1</i>               | -3.6201172 | -1.8560364 | 3.6201172 | down | chr17:61994562-61996198 (-) // 99.87 // q23.3    |
| 216208_s_at | <i>ATF6B</i>             | -3.6110518 | -1.8524191 | 3.6110518 | down | chr6:32084858-32088119 (-) // 37.38 // p21.33    |
| 222462_s_at | <i>BACE1</i>             | -3.6096764 | -1.8518695 | 3.6096764 | down | chr11:117156413-117186957 (-) // 98.32 // q23.3  |
| 221624_at   | <i>TCL6</i>              | -3.604718  | -1.8498864 | 3.604718  | down | chr14:96136775-96144437 (+) // 60.11 // q32.13   |
| 208496_x_at | <i>HIST1H3A//HIST1H3</i> | -3.5957317 | -1.8462853 | 3.5957317 | down | chr6:26271201-26271612 (-) // 100.0 // p22.2     |
| 225270_at   | <i>NEO1</i>              | -3.5939345 | -1.8455641 | 3.5939345 | down | chr15:73595851-73597546 (+) // 98.32 // q24.1    |
| 204504_s_at | <i>HIRIP3</i>            | -3.5868144 | -1.8427031 | 3.5868144 | down | chr16:30004316-30007316 (-) // 96.88 // p11.2    |
| 203066_at   | <i>CHST15</i>            | -3.5768604 | -1.8386939 | 3.5768604 | down | chr10:125767219-125851908 (-) // 96.69 // q26.13 |
| 210692_s_at | <i>SLC43A3</i>           | -3.5743902 | -1.8376971 | 3.5743902 | down | chr11:57175154-57194573 (-) // 95.72 // q12.1    |
| 213724_s_at | <i>PDK2</i>              | -3.5698895 | -1.8358794 | 3.5698895 | down | chr17:48173576-48183732 (+) // 85.57 // q21.33   |
| 221436_s_at | <i>CDCA3</i>             | -3.5659187 | -1.8342738 | 3.5659187 | down | chr12:6958206-6960116 (-) // 100.0 // p13.31     |
| 203551_s_at | <i>COX11</i>             | -3.558837  | -1.8314059 | 3.558837  | down | chr17:53029266-53046014 (-) // 94.73 // q22      |
| 201264_at   | <i>COPE</i>              | -3.5567024 | -1.8305403 | 3.5567024 | down | chr19:19010338-19030186 (-) // 97.7 // p13.11    |
| 227332_at   | <i>PXN-AS1</i>           | -3.5545394 | -1.8296627 | 3.5545394 | down | chr12:120639119-120650677 (+) // 84.09 // q24.23 |
| 209253_at   | <i>SORBS3</i>            | -3.552256  | -1.8287356 | 3.552256  | down | chr8:22409461-22433012 (+) // 97.69 // p21.3     |
| 228984_at   | <i>CARNS1</i>            | -3.5431082 | -1.8250155 | 3.5431082 | down | chr11:67183666-67193078 (+) // 92.8 // q13.2     |
| 238821_at   | <i>CSTF2</i>             | -3.5398715 | -1.823697  | 3.5398715 | down | chrX:100096048-100096514 (+) // 94.51 // q22.1   |
| 203919_at   | <i>TCEA2</i>             | -3.538334  | -1.8230702 | 3.538334  | down | chr20:62694647-62703691 (+) // 100.0 // q13.33   |
| 219034_at   | <i>PARP16</i>            | -3.5368066 | -1.8224473 | 3.5368066 | down | chr15:65550433-65579181 (-) // 99.2 // q22.31    |
| 1552422_at  | <i>C10orf25</i>          | -3.533316  | -1.8210227 | 3.533316  | down | chr10:45493520-45496336 (-) // 31.39 // q11.21   |
| 215260_s_at | <i>TCF3</i>              | -3.529356  | -1.819405  | 3.529356  | down | chr19:1609548-1632046 (-) // 94.21 // p13.3      |
| 241606_s_at | <i>TRUB1</i>             | -3.5247033 | -1.8175018 | 3.5247033 | down | chr10:116697678-116730199 (+) // 92.33 // q25.3  |
| 218229_s_at | <i>POGK</i>              | -3.5226889 | -1.8166771 | 3.5226889 | down | chr1:166822480-166823448 (+) // 99.28 // q24.1   |
| 232239_at   | <i>LINC00865</i>         | -3.5167656 | -1.8142492 | 3.5167656 | down | chr10:91589312-91600470 (+) // 65.62 // q23.31   |
| 223355_at   | <i>ALG1</i>              | -3.514983  | -1.8135177 | 3.514983  | down | chr16:5121842-5135037 (+) // 95.39 // p13.3      |
| 221703_at   | <i>BRIP1</i>             | -3.5101573 | -1.8115357 | 3.5101573 | down | chr17:59759984-59940755 (-) // 93.53 // q23.2    |



|             |                            |            |            |           |      |                                                                                               |
|-------------|----------------------------|------------|------------|-----------|------|-----------------------------------------------------------------------------------------------|
| 241933_at   | <i>QRSL1</i>               | -3.5028083 | -1.8085121 | 3.5028083 | down | chr6:107115667-107116287 (+) // 68.36 // q21                                                  |
| 207996_s_at | <i>LDLRAD4</i>             | -3.5002642 | -1.8074638 | 3.5002642 | down | chr18:13620866-13652753 (+) // 99.49 // p11.21                                                |
| 208027_s_at | <i>TLL2</i>                | -3.4940393 | -1.8048959 | 3.4940393 | down | chr10:98126255-98273668 (-) // 96.2 // q24.1                                                  |
| 203390_s_at | <i>KIF3C</i>               | -3.4932098 | -1.8045533 | 3.4932098 | down | chr2:26150657-26205005 (-) // 97.19 // p23.3                                                  |
| 223207_x_at | <i>PHPT1</i>               | -3.4808075 | -1.799422  | 3.4808075 | down | chr9:139743545-139745490 (+) // 97.67 // q34.3                                                |
| 227616_at   | <i>BCL9L</i>               | -3.480717  | -1.7993845 | 3.480717  | down | chr11:118768349-118768996 (-) // 95.52 // q23.3                                               |
| 210010_s_at | <i>SLC25A1</i>             | -3.4762836 | -1.7975458 | 3.4762836 | down | chr22:19163119-19166260 (-) // 95.24 // q11.21                                                |
| 209458_x_at | <i>HBA1///HBA2</i>         | -3.4719691 | -1.7957541 | 3.4719691 | down | chr16:226694-227448 (+) // 100.0 // p13.3///chr16:222890-223613 (+) // 95.08 // p13.3         |
| 202826_at   | <i>SPINT1</i>              | -3.4689543 | -1.7945008 | 3.4689543 | down | chr15:41136273-41149853 (+) // 98.54 // q15.1                                                 |
| 208506_at   | <i>HIST1H3A///HIST1H3B</i> | -3.4609542 | -1.7911699 | 3.4609542 | down | chr6:26250422-26250833 (-) // 100.0 // p22.2                                                  |
| 202533_s_at | <i>DHFR</i>                | -3.459988  | -1.7907671 | 3.459988  | down | chr5:79924809-79950790 (-) // 94.35 // q14.1                                                  |
| 202996_at   | <i>POLD4</i>               | -3.4585803 | -1.79018   | 3.4585803 | down | chr11:67119351-67120944 (-) // 100.0 // q13.2                                                 |
| 207042_at   | <i>E2F2</i>                | -3.4454188 | -1.7846794 | 3.4454188 | down | chr1:23836347-23857712 (-) // 99.94 // p36.12                                                 |
| 235447_at   | <i>TRUB1</i>               | -3.4375246 | -1.78137   | 3.4375246 | down | chr10:116734078-116735678 (+) // 95.58 // q25.3                                               |
| 266_s_at    | <i>CD24</i>                | -3.4354715 | -1.7805082 | 3.4354715 | down | chrY:21152536-21154651 (-) // 83.7 // q11.222                                                 |
| 211789_s_at | <i>MLXIP</i>               | -3.4302542 | -1.7783155 | 3.4302542 | down | chr12:122516759-122626359 (+) // 96.78 // q24.31                                              |
| 244666_at   |                            | -3.4294481 | -1.7779764 | 3.4294481 | down | chr17:19046336-19046815 (+) // 98.56 // p11.2///chr17:18934356-18934835 (-) // 98.56 // p11.2 |
| 207226_at   | <i>HIST1H2BN</i>           | -3.4289918 | -1.7777845 | 3.4289918 | down | chr6:27806209-27806910 (+) // 100.0 // p22.1                                                  |
| 231955_s_at | <i>HIBADH</i>              | -3.4196582 | -1.7738521 | 3.4196582 | down | chr7:27565832-27702606 (-) // 97.94 // p15.2                                                  |
| 208382_s_at | <i>DMC1</i>                | -3.4191077 | -1.7736199 | 3.4191077 | down | chr22:38915496-38966089 (-) // 97.42 // q13.1                                                 |
| 217640_x_at | <i>SKA1</i>                | -3.415482  | -1.7720892 | 3.415482  | down | chr18:47919245-47920162 (+) // 48.42 // q21.1                                                 |
| 209374_s_at | <i>IGHM</i>                | -3.4120853 | -1.7706537 | 3.4120853 | down | chr14:106320321-106830051 (-) // 96.49 // q32.33                                              |
| 203609_s_at | <i>ALDH5A1</i>             | -3.4084802 | -1.7691286 | 3.4084802 | down | chr6:24495224-24534858 (+) // 97.31 // p22.3                                                  |
| 201397_at   | <i>PHGDH</i>               | -3.4075396 | -1.7687304 | 3.4075396 | down | chr1:120254545-120286836 (+) // 75.59 // p12                                                  |
| 234694_at   | <i>CNTROB</i>              | -3.4069488 | -1.7684803 | 3.4069488 | down | chr17:7847772-7849248 (-) // 99.22 // p13.1                                                   |



|              |                           |            |            |           |      |                                                                                          |
|--------------|---------------------------|------------|------------|-----------|------|------------------------------------------------------------------------------------------|
| 211699_x_at  | <i>HBA1///HBA2</i>        | -3.4051077 | -1.7677004 | 3.4051077 | down | chr16:226690-227447 (+) // 99.59 //<br>p13.3///chr16:222886-223613 (+) // 95.11 // p13.3 |
| 225059_at    | <i>AGTRAP</i>             | -3.4022305 | -1.7664809 | 3.4022305 | down | chr1:11796157-11810825 (+) // 94.92 // p36.22                                            |
| 204925_at    | <i>CTNS</i>               | -3.3943703 | -1.763144  | 3.3943703 | down | chr17:3540015-3564832 (+) // 99.85 // p13.2                                              |
| 204247_s_at  | <i>CDK5</i>               | -3.386081  | -1.7596165 | 3.386081  | down | chr7:150751012-150754960 (-) // 100.0 // q36.1                                           |
| 200696_s_at  | <i>GSN</i>                | -3.383708  | -1.7586051 | 3.383708  | down | chr9:124062124-124095120 (+) // 97.19 // q33.2                                           |
| 211637_x_at  | <i>IGH///IGHA1///IGHA</i> | -3.3823266 | -1.758016  | 3.3823266 | down | chr14:106329408-106478400 (-) // 89.14 // q32.33                                         |
| 224498_x_at  | <i>AXIN2</i>              | -3.377037  | -1.755758  | 3.377037  | down | chr17:63524684-63556446 (-) // 87.33 // q24.1                                            |
| 1559059_s_at | <i>ZNF611</i>             | -3.3593905 | -1.7481995 | 3.3593905 | down | chr19:53204822-53206435 (-) // 44.42 // q13.41                                           |
| 201539_s_at  | <i>FHL1</i>               | -3.3586452 | -1.7478794 | 3.3586452 | down | chrX:135288570-135292286 (+) // 100.0 // q26.3                                           |
| 213444_at    | <i>ZNF862</i>             | -3.3578296 | -1.747529  | 3.3578296 | down | chr7:149543276-149564567 (+) // 98.05 // q36.1                                           |
| 1555033_a_at | <i>RGS12</i>              | -3.3531384 | -1.745512  | 3.3531384 | down | chr4:3317794-3345083 (+) // 95.92 // p16.3                                               |
| 221602_s_at  | <i>FAIM3</i>              | -3.3521216 | -1.7450745 | 3.3521216 | down | chr1:207078214-207095218 (-) // 99.93 // q32.1                                           |
| 206255_at    | <i>BLK</i>                | -3.3510637 | -1.7446191 | 3.3510637 | down | chr8:11351879-11422107 (+) // 95.7 // p23.1                                              |
| 214115_at    | <i>VAMP5</i>              | -3.3510172 | -1.7445991 | 3.3510172 | down | chr2:85811556-85820515 (-) // 100.0 // p11.2                                             |
| 212484_at    | <i>FAM89B</i>             | -3.350928  | -1.7445607 | 3.350928  | down | chr11:65339844-65341661 (+) // 87.58 // q13.1                                            |
| 211825_s_at  | <i>FLI1</i>               | -3.3431566 | -1.7412109 | 3.3431566 | down | chr22:29668203-29683125 (+) // 54.72 // q12.2                                            |
| 243363_at    | <i>LEF1-AS1</i>           | -3.3427238 | -1.7410241 | 3.3427238 | down | chr4:109096864-109097582 (+) // 94.35 // q25                                             |
| 213357_at    | <i>GTF2H5</i>             | -3.3404267 | -1.7400324 | 3.3404267 | down | chr6:158589383-158613446 (+) // 89.01 // q25.3                                           |
| 204011_at    | <i>SPRY2</i>              | -3.3401203 | -1.7399001 | 3.3401203 | down | chr13:80910113-80915086 (-) // 96.3 // q31.1                                             |
| 1558801_at   | <i>LOC100652772</i>       | -3.3388958 | -1.7393711 | 3.3388958 | down |                                                                                          |
| 1553163_at   | <i>ADPRHL1</i>            | -3.3362212 | -1.738215  | 3.3362212 | down | chr13:114076947-114107840 (-) // 96.62 // q34                                            |
| 202150_s_at  | <i>NEDD9</i>              | -3.3322265 | -1.7364864 | 3.3322265 | down | chr6:11185274-11232886 (-) // 98.77 // p24.2                                             |
| 218812_s_at  | <i>ORAI2</i>              | -3.331393  | -1.7361256 | 3.331393  | down | chr7:102087648-102089163 (+) // 80.53 // q22.1                                           |
| 228632_at    | <i>MEG9</i>               | -3.328632  | -1.7349294 | 3.328632  | down | chr14:101536342-101539271 (+) // 83.53 // q32.31                                         |
| 227972_at    | <i>TOR2A</i>              | -3.326693  | -1.7340888 | 3.326693  | down | chr9:130493802-130497554 (-) // 87.92 // q34.11                                          |
| 238039_at    | <i>LOC728769</i>          | -3.325444  | -1.733547  | 3.325444  | down | chr5:77654624-77655530 (-) // 44.84 // q14.1                                             |
| 235582_at    | <i>E2F2</i>               | -3.325346  | -1.7335044 | 3.325346  | down | chr1:23833616-23834800 (-) // 72.66 // p36.12                                            |
| 212767_at    | <i>MTG1</i>               | -3.3245392 | -1.7331544 | 3.3245392 | down | chr10:135207620-135234593 (+) // 99.8 // q26.3                                           |

|              |                        |            |            |           |      |                                                  |
|--------------|------------------------|------------|------------|-----------|------|--------------------------------------------------|
| 213587_s_at  | <i>ATP6V0E2</i>        | -3.3241928 | -1.7330041 | 3.3241928 | down | chr7:149577303-149577784 (+) // 94.44 // q36.1   |
| 218752_at    | <i>ZMAT5</i>           | -3.3212152 | -1.7317111 | 3.3212152 | down | chr22:30126946-30144563 (-) // 88.52 // q12.2    |
| 217513_at    | <i>MILR1</i>           | -3.3187423 | -1.7306366 | 3.3187423 | down |                                                  |
| 227791_at    | <i>SLC9A9</i>          | -3.3167496 | -1.7297701 | 3.3167496 | down | chr3:142984064-142985286 (-) // 96.19 // q24     |
| 1558107_at   | <i>LOC283788</i>       | -3.313518  | -1.7283638 | 3.313518  | down | chr20:29611890-29652958 (+) // 35.41 // q11.21   |
| 207843_x_at  | <i>CYB5A</i>           | -3.298815  | -1.7219479 | 3.298815  | down | chr18:71920531-71959110 (-) // 99.72 // q22.3    |
| 218689_at    | <i>FANCF</i>           | -3.2981317 | -1.721649  | 3.2981317 | down | chr11:22644443-22647369 (-) // 85.89 // p14.3    |
| 224550_s_at  | <i>MRVI1</i>           | -3.296517  | -1.7209425 | 3.296517  | down | chr11:10597870-10715161 (-) // 99.69 // p15.4    |
| 203136_at    | <i>RABAC1</i>          | -3.2955163 | -1.7205045 | 3.2955163 | down | chr19:42460837-42463471 (-) // 95.45 // q13.2    |
| 1555766_a_at | <i>GNG2</i>            | -3.2923532 | -1.7191191 | 3.2923532 | down | chr14:52417396-52433405 (+) // 100.0 // q22.1    |
| 201272_at    | <i>AKR1B1</i>          | -3.2835865 | -1.7152724 | 3.2835865 | down | chr7:134127108-134143858 (-) // 99.93 // q33     |
| 217871_s_at  | <i>MIF</i>             | -3.2823799 | -1.7147422 | 3.2823799 | down | chr22:24236564-24237409 (+) // 100.0 // q11.23   |
| 202645_s_at  | <i>MEN1</i>            | -3.2818549 | -1.7145114 | 3.2818549 | down | chr11:64570995-64578188 (-) // 98.7 // q13.1     |
| 207296_at    | <i>ZNF343</i>          | -3.281848  | -1.7145084 | 3.281848  | down | chr20:1935336-2481389 (-) // 63.2 // p13         |
| 64408_s_at   | <i>CALML4</i>          | -3.2781355 | -1.7128755 | 3.2781355 | down | chr15:68486139-68492016 (-) // 79.62 // q23      |
| 203189_s_at  | <i>MIR4691//NDUFS8</i> | -3.277581  | -1.7126315 | 3.277581  | down | chr11:67798108-67804114 (+) // 99.87 // q13.2    |
| 203119_at    | <i>CCDC86</i>          | -3.2722878 | -1.7102996 | 3.2722878 | down | chr11:60609543-60618553 (+) // 91.94 // q12.2    |
| 224727_at    | <i>EMC10</i>           | -3.2714155 | -1.709915  | 3.2714155 | down | chr19:50979777-50986666 (+) // 90.28 // q13.33   |
| 208889_s_at  | <i>NCOR2</i>           | -3.270328  | -1.7094353 | 3.270328  | down | chr12:124808960-124979915 (-) // 96.84 // q24.31 |
| 230073_at    | <i>LOC100131564</i>    | -3.263784  | -1.7065456 | 3.263784  | down | chr1:93811563-93812095 (-) // 83.08 // p22.1     |
| 41160_at     | <i>MBD3</i>            | -3.2630675 | -1.7062289 | 3.2630675 | down | chr19:1576676-1592652 (-) // 90.06 // p13.3      |
| 238623_at    |                        | -3.2615798 | -1.7055709 | 3.2615798 | down | chr6:161411349-161412022 (-) // 65.19 // q26     |
| 204985_s_at  | <i>TRAPPC6A</i>        | -3.250622  | -1.7007158 | 3.250622  | down | chr19:45666186-45681485 (-) // 96.59 // q13.32   |
| 231723_at    | <i>SNX12</i>           | -3.2456343 | -1.6985005 | 3.2456343 | down | chrX:70280740-70288273 (-) // 93.36 // q13.1     |
| 1554468_s_at | <i>MRPL38</i>          | -3.2368538 | -1.6945922 | 3.2368538 | down | chr17:73900302-73919713 (-) // 86.56 // q25.1    |
| 202149_at    | <i>NEDD9</i>           | -3.232989  | -1.6928686 | 3.232989  | down | chr6:11183538-11232901 (-) // 97.96 // p24.2     |
| 221590_s_at  | <i>ALDH6A1</i>         | -3.2307549 | -1.6918713 | 3.2307549 | down | chr14:74525749-74527377 (-) // 52.38 // q24.3    |
| 216064_s_at  | <i>AGA</i>             | -3.2290792 | -1.6911229 | 3.2290792 | down | chr4:178354414-178360819 (-) // 99.41 // q34.3   |

|              |                           |            |            |           |      |                                                                                                                                                   |
|--------------|---------------------------|------------|------------|-----------|------|---------------------------------------------------------------------------------------------------------------------------------------------------|
| 219271_at    | <i>GALNT14</i>            | -3.2250369 | -1.6893157 | 3.2250369 | down | chr2:31133333-31361013 (-) // 96.03 // p23.1                                                                                                      |
| 234809_at    | <i>ZC4H2</i>              | -3.2229369 | -1.688376  | 3.2229369 | down | chrX:64136367-64196413 (+) // 74.03 // q11.2                                                                                                      |
| 206925_at    | <i>ST8SIA4</i>            | -3.221989  | -1.6879516 | 3.221989  | down | chr5:100146948-100238871 (-) // 99.95 // q21.1                                                                                                    |
| 230555_s_at  | <i>MED30</i>              | -3.2197652 | -1.6869555 | 3.2197652 | down | chr8:118532995-118541048 (-) // 90.84 // q24.11                                                                                                   |
| 214061_at    | <i>WDR67</i>              | -3.2173467 | -1.6858714 | 3.2173467 | down | chr8:124113192-124164390 (+) // 98.48 // q24.13                                                                                                   |
| 209651_at    | <i>TGFB1I1</i>            | -3.2037845 | -1.6797771 | 3.2037845 | down | chr16:31484523-31489280 (+) // 98.36 // p11.2                                                                                                     |
|              |                           |            |            |           |      | chrX:154114592-154116335 (+) // 93.69 //<br>q28//chrX:154611706-154613449 (+) // 93.57 //<br>q28//chrX:154686575-154688318 (-) // 93.57 //<br>q28 |
| 203274_at    | <i>F8A1///F8A2///F8A:</i> | -3.2036772 | -1.6797287 | 3.2036772 | down | chr6:26636518-26638747 (-) // 98.67 //<br>p22.2//chr9:99959535-99961759 (-) // 98.36 //<br>q22.33                                                 |
| 219376_at    | <i>ZNF322</i>             | -3.2001896 | -1.6781573 | 3.2001896 | down | chr21:37442336-37445272 (+) // 97.38 // q22.12                                                                                                    |
| 209213_at    | <i>CBR1</i>               | -3.1970606 | -1.6767461 | 3.1970606 | down | chr6:111982941-112194625 (-) // 95.78 // q21                                                                                                      |
| 216033_s_at  | <i>FYN</i>                | -3.190471  | -1.6737694 | 3.190471  | down | chr16:226678-227521 (+) // 91.15 // p13.3                                                                                                         |
| 211745_x_at  | <i>HBA1///HBA2</i>        | -3.189322  | -1.6732497 | 3.189322  | down | chr17:43138687-43185884 (+) // 98.33 // q21.31                                                                                                    |
| 201159_s_at  | <i>NMT1</i>               | -3.1886387 | -1.6729406 | 3.1886387 | down | chr14:55518376-55532486 (+) // 85.07 // q22.3                                                                                                     |
| 212497_at    | <i>MAPK1IP1L</i>          | -3.188599  | -1.6729227 | 3.188599  | down | chr12:123468980-123519201 (-) // 98.02 // q24.31                                                                                                  |
| 1552924_a_at | <i>PITPNM2</i>            | -3.185789  | -1.6716508 | 3.185789  | down | chr6:29597218-29597997 (-) // 68.79 // p22.1                                                                                                      |
| 238569_at    | <i>GABBR1</i>             | -3.1839824 | -1.6708324 | 3.1839824 | down | chr6:27834571-27835425 (-) // 100.0 // p22.1                                                                                                      |
| 214534_at    | <i>HIST1H1B</i>           | -3.1837785 | -1.67074   | 3.1837785 | down | chr14:107169929-107170155 (-) // 84.77 // q32.33                                                                                                  |
| 216541_x_at  | <i>IGHG1///IGHM</i>       | -3.1829572 | -1.6703677 | 3.1829572 | down | chr6:32974572-32975109 (-) // 95.1 // p21.32                                                                                                      |
| 217001_x_at  | <i>HLA-DOA</i>            | -3.1825616 | -1.6701884 | 3.1825616 | down | chr13:107195675-107220512 (-) // 91.68 // q33.3                                                                                                   |
| 222508_s_at  | <i>ARGLU1</i>             | -3.1814046 | -1.6696639 | 3.1814046 | down | chr3:67425144-67705002 (-) // 96.33 // p14.1                                                                                                      |
| 215772_x_at  | <i>SUCLG2</i>             | -3.1813617 | -1.6696444 | 3.1813617 | down | chr3:129367543-129389684 (-) // 99.12 // q22.1                                                                                                    |
| 213351_s_at  | <i>TMCC1</i>              | -3.1804943 | -1.669251  | 3.1804943 | down | chr22:50898972-50900136 (+) // 100.0 // q13.33                                                                                                    |
| 222084_s_at  | <i>SBF1</i>               | -3.1790276 | -1.6685855 | 3.1790276 | down | chr15:68871574-69020140 (+) // 87.83 // q23                                                                                                       |
| 209789_at    | <i>CORO2B</i>             | -3.174277  | -1.6664281 | 3.174277  | down | chrX:152713127-152736095 (-) // 99.85 // q28                                                                                                      |
| 207891_s_at  | <i>HAUS7///TREX2</i>      | -3.1731594 | -1.66592   | 3.1731594 | down | chr19:18391220-18391739 (+) // 90.77 // p13.11                                                                                                    |
| 229117_s_at  | <i>JUND</i>               | -3.1731133 | -1.665899  | 3.1731133 | down |                                                                                                                                                   |

|              |                         |            |            |           |      |                                                  |
|--------------|-------------------------|------------|------------|-----------|------|--------------------------------------------------|
| 1557455_s_at | <i>MOSPD1</i>           | -3.1726635 | -1.6656945 | 3.1726635 | down | chrX:134033056-134049251 (-) // 81.03 // q26.3   |
| 203608_at    | <i>ALDH5A1</i>          | -3.1700962 | -1.6645266 | 3.1700962 | down | chr6:24495007-24537435 (+) // 84.85 // p22.3     |
| 205107_s_at  | <i>EFNA4</i>            | -3.1696274 | -1.6643133 | 3.1696274 | down | chr1:155036272-155042014 (+) // 98.9 // q22      |
| 218046_s_at  | <i>MRPS16</i>           | -3.1671808 | -1.6631992 | 3.1671808 | down | chr10:75010499-75012409 (-) // 97.71 // q22.2    |
| 212212_s_at  | <i>INTS1</i>            | -3.166267  | -1.6627829 | 3.166267  | down | chr7:1509912-1533488 (-) // 98.16 // p22.3       |
| 210298_x_at  | <i>FHL1</i>             | -3.1662629 | -1.662781  | 3.1662629 | down | chrX:135252112-135292184 (+) // 99.82 // q26.3   |
| 215891_s_at  | <i>GM2A</i>             | -3.164834  | -1.6621299 | 3.164834  | down | chr5:150639359-150646885 (+) // 78.09 // q33.1   |
| 222470_s_at  | <i>UQCC</i>             | -3.1624362 | -1.6610364 | 3.1624362 | down | chr20:33890380-33999944 (-) // 97.94 // q11.22   |
| 204947_at    | <i>E2F1</i>             | -3.159232  | -1.6595738 | 3.159232  | down | chr20:32263488-32274193 (-) // 94.77 // q11.22   |
| 235262_at    | <i>ZNF585B</i>          | -3.1591706 | -1.6595459 | 3.1591706 | down | chr19:37675466-37676415 (-) // 82.55 // q13.12   |
| 201979_s_at  | <i>PPP5C</i>            | -3.1582968 | -1.6591468 | 3.1582968 | down | chr19:46850353-46893838 (+) // 100.0 // q13.32   |
| 225998_at    | <i>GAB1</i>             | -3.1554775 | -1.6578584 | 3.1554775 | down | chr4:144359643-144393901 (+) // 99.0 // q31.21   |
| 217354_s_at  | <i>HPS1</i>             | -3.1513622 | -1.6559756 | 3.1513622 | down | chr22:36932698-36933771 (-) // 100.0 // q12.3    |
| 230787_at    | <i>OTTHUMG000000124</i> | -3.1494172 | -1.6550848 | 3.1494172 | down | chr1:151319485-151320503 (+) // 99.31 // q21.3   |
| 227130_s_at  | <i>TLE1</i>             | -3.1486485 | -1.6547327 | 3.1486485 | down | chr9:84205813-84225212 (+) // 93.23 // q21.32    |
| 204116_at    | <i>IL2RG</i>            | -3.1426473 | -1.6519804 | 3.1426473 | down | chrX:70327258-70331403 (-) // 97.52 // q13.1     |
| 231715_s_at  | <i>PYCR2</i>            | -3.1404383 | -1.6509659 | 3.1404383 | down | chr1:226107781-226111993 (-) // 96.33 // q42.12  |
| 202030_at    | <i>BCKDK</i>            | -3.1374385 | -1.6495872 | 3.1374385 | down | chr16:31119720-31123919 (+) // 96.3 // p11.2     |
|              |                         |            |            |           |      | chr16:2163153-2163557 (+) // 76.72 //            |
|              |                         |            |            |           |      | p13.3///chr16:18440078-18440482 (+) // 75.98 //  |
|              |                         |            |            |           |      | p12.3///chr16:18483562-18483966 (+) // 56.37 //  |
|              |                         |            |            |           |      | p12.3///chr16:16415898-16416302 (-) // 69.12 //  |
|              |                         |            |            |           |      | p13.11///chr16:16455928-16456332 (-) // 56.37 // |
|              |                         |            |            |           |      | p13.11///chr16:15017247-15017651 (-) // 68.63 // |
|              |                         |            |            |           |      | p13.11                                           |
| 241090_at    | <i>OTTHUMG000001770</i> | -3.1363084 | -1.6490674 | 3.1363084 | down | chr3:48335590-48342849 (-) // 74.87 // p21.31    |
| 205851_at    | <i>NME6</i>             | -3.1290915 | -1.6457438 | 3.1290915 | down | chr16:3103194-3104301 (-) // 56.28 // p13.3      |
| 228085_at    | <i>LOC100507419//LO</i> | -3.1239252 | -1.6433599 | 3.1239252 | down | chr6:71276629-71299266 (+) // 72.24 // q13       |
| 238504_at    | <i>C6orf57</i>          | -3.1129065 | -1.6382623 | 3.1129065 | down | chr1:203274625-203278730 (+) // 97.67 // q32.1   |
| 201235_s_at  | <i>BTG2</i>             | -3.110975  | -1.6373668 | 3.110975  | down | chr9:95883781-95896519 (-) // 92.22 // q22.31    |
| 203045_at    | <i>NINJ1</i>            | -3.1103036 | -1.6370554 | 3.1103036 | down |                                                  |

|              |                          |            |            |           |      |                                                 |
|--------------|--------------------------|------------|------------|-----------|------|-------------------------------------------------|
| 206666_at    | <i>GZMK</i>              | -3.1086864 | -1.6363051 | 3.1086864 | down | chr5:54320110-54329959 (+) // 100.0 // q11.2    |
| 209182_s_at  | <i>C10orf10</i>          | -3.1022394 | -1.63331   | 3.1022394 | down | chr10:45471576-45474257 (-) // 91.19 // q11.21  |
| 222713_s_at  | <i>FANCF</i>             | -3.0964215 | -1.6306019 | 3.0964215 | down | chr11:22646163-22647356 (-) // 98.6 // p14.3    |
| 36499_at     | <i>CELSR2</i>            | -3.088311  | -1.6268181 | 3.088311  | down | chr1:109794571-109818373 (+) // 78.27 // p13.3  |
| 213599_at    | <i>OIP5</i>              | -3.0877218 | -1.6265428 | 3.0877218 | down | chr15:41601317-41624801 (-) // 96.49 // q15.1   |
| 223482_at    | <i>TMEM120A</i>          | -3.082748  | -1.6242169 | 3.082748  | down | chr7:75616307-75623953 (-) // 96.97 // q11.23   |
| 204960_at    | <i>PTPRCAP</i>           | -3.0730457 | -1.6196692 | 3.0730457 | down | chr11:67202980-67205153 (-) // 95.96 // q13.2   |
| 203028_s_at  | <i>CYBA</i>              | -3.067958  | -1.6172788 | 3.067958  | down | chr16:88709697-88717449 (-) // 93.6 // q24.3    |
| 209366_x_at  | <i>CYB5A</i>             | -3.063914  | -1.6153759 | 3.063914  | down | chr18:71920532-71959153 (-) // 98.52 // q22.3   |
| 205798_at    | <i>IL7R</i>              | -3.0591698 | -1.6131402 | 3.0591698 | down | chr5:35857057-35876844 (+) // 98.55 // p13.2    |
| 204824_at    | <i>ENDOG</i>             | -3.0586352 | -1.6128881 | 3.0586352 | down | chr9:131580806-131584954 (+) // 95.06 // q34.11 |
| 212437_at    | <i>CENPB</i>             | -3.0572047 | -1.6122131 | 3.0572047 | down | chr20:3764497-3767130 (-) // 89.82 // p13       |
| 201102_s_at  | <i>PFKL</i>              | -3.0559158 | -1.6116048 | 3.0559158 | down | chr21:45719933-45747256 (+) // 99.49 // q22.3   |
| 213352_at    | <i>TMCC1</i>             | -3.0538461 | -1.6106274 | 3.0538461 | down | chr3:129367543-129389684 (-) // 99.12 // q22.1  |
| 210006_at    | <i>ABHD14A</i>           | -3.0523627 | -1.6099263 | 3.0523627 | down | chr3:52009082-52015210 (+) // 96.19 // p21.2    |
| 228402_at    | <i>ZBED3</i>             | -3.0499723 | -1.6087961 | 3.0499723 | down | chr5:76372440-76373063 (-) // 95.41 // q13.3    |
| 221286_s_at  | <i>MZB1</i>              | -3.0492933 | -1.608475  | 3.0492933 | down | chr5:138723194-138723738 (-) // 100.0 // q31.2  |
| 228052_x_at  | <i>TCF3</i>              | -3.0478535 | -1.6077936 | 3.0478535 | down | chr19:1611055-1615797 (+) // 99.82 // p13.3     |
| 224722_at    | <i>MIB1</i>              | -3.0471559 | -1.6074632 | 3.0471559 | down | chr18:19395721-19450914 (+) // 97.29 // q11.2   |
| 214992_s_at  | <i>DNASE2</i>            | -3.046013  | -1.6069221 | 3.046013  | down | chr19:12986803-12992190 (-) // 98.0 // p13.2    |
| 225233_at    | <i>MSI2</i>              | -3.0458796 | -1.606859  | 3.0458796 | down | chr17:55693354-55760253 (+) // 94.4 // q22      |
| 213121_at    | <i>SNRNP70</i>           | -3.045035  | -1.6064588 | 3.045035  | down | chr19:49605720-49611859 (+) // 93.35 // q13.33  |
| 1555691_a_at | <i>KLRC4-KLRK1///KLF</i> | -3.044802  | -1.6063484 | 3.044802  | down | chr12:10525783-10544473 (-) // 100.0 // p13.2   |
| 238607_at    | <i>ZNF296</i>            | -3.0437725 | -1.6058605 | 3.0437725 | down | chr19:45574758-45575542 (-) // 93.53 // q13.32  |
| 204483_at    | <i>ENO3</i>              | -3.0431275 | -1.6055548 | 3.0431275 | down | chr17:4855121-4860423 (+) // 99.28 // p13.2     |
| 208748_s_at  | <i>FLOT1</i>             | -3.0406413 | -1.6043756 | 3.0406413 | down | chr6:30695485-30710469 (-) // 99.84 // p21.33   |
| 221790_s_at  | <i>LDLRAP1</i>           | -3.0397484 | -1.6039519 | 3.0397484 | down | chr1:25870111-25895377 (+) // 92.83 // p36.11   |
| 230257_s_at  | <i>TSEN15</i>            | -3.0394568 | -1.6038135 | 3.0394568 | down | chr1:184020918-184023997 (+) // 64.93 // q25.3  |

|              |                     |            |            |           |      |                                                 |
|--------------|---------------------|------------|------------|-----------|------|-------------------------------------------------|
| 219243_at    | <i>GIMAP4</i>       | -3.0352316 | -1.6018066 | 3.0352316 | down | chr7:150264495-150271040 (+) // 96.37 // q36.1  |
| 203004_s_at  | <i>MEF2D</i>        | -3.0349796 | -1.6016868 | 3.0349796 | down | chr1:156437278-156470334 (-) // 93.38 // q22    |
| 211102_s_at  | <i>LILRA2</i>       | -3.0346308 | -1.601521  | 3.0346308 | down | chr19:55085345-55098862 (+) // 99.85 // q13.42  |
| 213854_at    | <i>SYNGR1</i>       | -3.033854  | -1.6011517 | 3.033854  | down | chr22:39760174-39774386 (+) // 77.12 // q13.1   |
| 215195_at    | <i>PRKCA</i>        | -3.0332556 | -1.600867  | 3.0332556 | down | chr17:64800301-64801434 (+) // 96.58 // q24.2   |
| 216379_x_at  | <i>CD24</i>         | -3.0331364 | -1.6008104 | 3.0331364 | down | chr6:111587518-111588749 (+) // 61.63 // q21    |
| 238508_at    | <i>DBF4B</i>        | -3.0303338 | -1.5994767 | 3.0303338 | down | chr17:42826803-42827915 (+) // 93.67 // q21.31  |
| 239105_at    |                     | -3.029814  | -1.5992292 | 3.029814  | down | chr14:71373369-71373931 (-) // 99.82 // q24.2   |
| 235728_at    | <i>ZFP3</i>         | -3.0297167 | -1.599183  | 3.0297167 | down | chr17:4998936-4999669 (+) // 49.19 // p13.2     |
| 1554574_a_at | <i>CYB5R3</i>       | -3.0290496 | -1.5988653 | 3.0290496 | down | chr22:43015692-43042915 (-) // 89.09 // q13.2   |
| 235709_at    | <i>GAS2L3</i>       | -3.027247  | -1.5980064 | 3.027247  | down | chr12:101017569-101018686 (+) // 99.73 // q23.1 |
| 203222_s_at  | <i>TLE1</i>         | -3.027037  | -1.5979062 | 3.027037  | down | chr9:84199098-84303181 (-) // 99.19 // q21.32   |
| 236994_at    |                     | -3.0212824 | -1.5951611 | 3.0212824 | down | chr6:99317551-99317968 (-) // 98.11 // q16.1    |
| 213887_s_at  | <i>POLR2E</i>       | -3.0205364 | -1.5948048 | 3.0205364 | down | chr19:1088588-1095332 (-) // 96.81 // p13.3     |
| 227287_at    | <i>CITED2</i>       | -3.0152113 | -1.5922592 | 3.0152113 | down | chr6:139694521-139695694 (+) // 98.46 // q24.1  |
| 219323_s_at  | <i>IL18BP</i>       | -3.0141945 | -1.5917726 | 3.0141945 | down | chr11:71710108-71714799 (+) // 97.33 // q13.4   |
| 210334_x_at  | <i>BIRC5</i>        | -3.00831   | -1.5889533 | 3.00831   | down | chr17:76210371-76219705 (+) // 87.67 // q25.3   |
| 218573_at    | <i>MAGEH1</i>       | -3.0057278 | -1.5877143 | 3.0057278 | down | chrX:55478537-55479961 (+) // 96.41 // p11.21   |
| 213809_x_at  | <i>TCF3</i>         | -3.004667  | -1.5872052 | 3.004667  | down | chr19:1610963-1615797 (+) // 96.38 // p13.3     |
| 200922_at    | <i>KDELR1</i>       | -3.0044138 | -1.5870836 | 3.0044138 | down | chr19:48886250-48894756 (-) // 99.17 // q13.33  |
| 1560503_a_at | <i>LOC100130275</i> | -3.001487  | -1.5856774 | 3.001487  | down | chr6:10414299-10416190 (+) // 95.03 // p24.3    |
| 210613_s_at  | <i>SYNGR1</i>       | -3.001345  | -1.5856091 | 3.001345  | down | chr22:39745983-39773915 (+) // 92.25 // q13.1   |
| 209695_at    | <i>PTP4A3</i>       | -2.9987051 | -1.5843396 | 2.9987051 | down | chr8:142432006-142441620 (+) // 94.58 // q24.3  |
| 220557_s_at  | <i>PACS1</i>        | -2.9933558 | -1.5817637 | 2.9933558 | down | chr11:65998346-66012215 (+) // 99.94 // q13.2   |
| 214227_at    |                     | -2.9921875 | -1.5812006 | 2.9921875 | down | chr19:2514448-2646281 (+) // 91.22 // p13.3     |
| 241342_at    | <i>TMEM65</i>       | -2.9908626 | -1.5805616 | 2.9908626 | down | chr8:125323486-125325408 (-) // 99.59 // q24.13 |
| 1555973_at   |                     | -2.990852  | -1.5805566 | 2.990852  | down | chr11:126219176-126220172 (+) // 76.08 // q24.2 |
| 1554487_a_at | <i>ATF6B</i>        | -2.9883845 | -1.5793657 | 2.9883845 | down | chr6:32088247-32095996 (-) // 65.75 // p21.33   |

|              |                          |            |            |           |      |                                                  |
|--------------|--------------------------|------------|------------|-----------|------|--------------------------------------------------|
| 208973_at    | <i>ERI3</i>              | -2.9880707 | -1.5792143 | 2.9880707 | down | chr1:44686765-44785372 (-) // 96.92 // p34.1     |
| 240711_at    |                          | -2.987398  | -1.5788894 | 2.987398  | down | chr3:158262452-158262917 (-) // 99.79 // q25.32  |
| 39729_at     | <i>PRDX2</i>             | -2.987311  | -1.5788474 | 2.987311  | down | chr19:12907636-12912662 (-) // 75.2 // p13.2     |
| 204336_s_at  | <i>RGS19</i>             | -2.9868138 | -1.5786073 | 2.9868138 | down | chr20:62704536-62710865 (-) // 97.73 // q13.33   |
| 212827_at    | <i>IGHM</i>              | -2.981881  | -1.5762227 | 2.981881  | down | chr14:106318039-106631502 (-) // 92.08 // q32.33 |
| 215945_s_at  | <i>TRIM2</i>             | -2.9817939 | -1.5761806 | 2.9817939 | down | chr4:154143990-154260468 (+) // 97.32 // q31.3   |
| 1558785_a_at | <i>RGS5</i>              | -2.9809897 | -1.5757914 | 2.9809897 | down | chr1:163273847-163291542 (-) // 56.21 // q23.3   |
| 219219_at    | <i>TMEM160</i>           | -2.9802232 | -1.5754204 | 2.9802232 | down | chr19:47549167-47551882 (-) // 85.78 // q13.32   |
| 206248_at    | <i>PRKCE</i>             | -2.9785752 | -1.5746224 | 2.9785752 | down | chr2:45879224-46412035 (+) // 99.96 // p21       |
| 1554327_a_at | <i>CANT1</i>             | -2.9775298 | -1.5741159 | 2.9775298 | down | chr17:76989568-77005854 (-) // 88.2 // q25.3     |
| 230377_s_at  | <i>TBC1D2B</i>           | -2.9748178 | -1.5728012 | 2.9748178 | down | chr15:78337348-78369931 (+) // 95.52 // q25.1    |
| 238045_at    | <i>TMEM65</i>            | -2.9741492 | -1.572477  | 2.9741492 | down | chr8:125325352-125384206 (-) // 97.91 // q24.13  |
| 232566_at    | <i>NOL6</i>              | -2.973805  | -1.57231   | 2.973805  | down | chr9:33462114-33473918 (-) // 97.61 // p13.3     |
| 204205_at    | <i>APOBEC3G</i>          | -2.9716372 | -1.5712581 | 2.9716372 | down | chr22:39473135-39483747 (+) // 99.36 // q13.1    |
| 1569061_at   | <i>IQGAP3</i>            | -2.971215  | -1.571053  | 2.971215  | down | chr1:156495197-156542396 (-) // 98.93 // q22     |
| 242917_at    | <i>RASGEF1A</i>          | -2.9689877 | -1.5699711 | 2.9689877 | down | chr10:43691372-43693573 (-) // 95.19 // q11.21   |
| 207521_s_at  | <i>ATP2A3</i>            | -2.9678593 | -1.5694227 | 2.9678593 | down | chr17:3828639-3867709 (-) // 98.72 // p13.2      |
| 235016_at    | <i>REEP3</i>             | -2.9678335 | -1.5694102 | 2.9678335 | down | chr10:65281191-65381838 (+) // 98.14 // q21.3    |
| 226209_at    | <i>NDUFV3</i>            | -2.9649599 | -1.5680126 | 2.9649599 | down | chr21:44313389-44329213 (+) // 98.55 // q22.3    |
| 217891_at    | <i>C16orf58</i>          | -2.9645824 | -1.5678289 | 2.9645824 | down | chr16:31500814-31519706 (-) // 96.63 // p11.2    |
| 226246_at    | <i>KCTD1</i>             | -2.9640532 | -1.5675713 | 2.9640532 | down | chr18:24034876-24209206 (-) // 89.17 // q11.2    |
| 218006_s_at  | <i>ZNF22</i>             | -2.9638884 | -1.5674912 | 2.9638884 | down | chr10:45498727-45499526 (+) // 99.75 // q11.21   |
| 201850_at    | <i>CAPG</i>              | -2.9621124 | -1.5666264 | 2.9621124 | down | chr2:85621890-85637474 (-) // 99.75 // p11.2     |
| 208680_at    | <i>PRDX1</i>             | -2.961272  | -1.5662171 | 2.961272  | down | chr1:45976840-45987555 (-) // 99.03 // p34.1     |
| 204240_s_at  | <i>SMC2</i>              | -2.9601078 | -1.5656497 | 2.9601078 | down | chr9:106856606-106901937 (+) // 98.22 // q31.1   |
| 217188_s_at  | <i>C14orf1</i>           | -2.9595382 | -1.5653721 | 2.9595382 | down | chr14:76117897-76127214 (-) // 100.0 // q24.3    |
| 223530_at    | <i>TDRKH</i>             | -2.9593437 | -1.5652772 | 2.9593437 | down | chr1:151745963-151762998 (-) // 99.02 // q21.3   |
| 213690_s_at  | <i>AC018766.5//OTTHL</i> | -2.9591208 | -1.5651686 | 2.9591208 | down | chr19:50359721-50362219 (-) // 94.35 // q13.33   |

|              |                          |            |            |           |      |                                                 |
|--------------|--------------------------|------------|------------|-----------|------|-------------------------------------------------|
| 236692_at    | <i>OTTHUMG000001798i</i> | -2.958558  | -1.5648942 | 2.958558  | down | chr17:33733705-33734150 (-) // 98.45 // q12     |
| 221692_s_at  | <i>MRPL34</i>            | -2.9543386 | -1.5628352 | 2.9543386 | down | chr19:17416638-17417578 (+) // 69.34 // p13.11  |
| 223479_s_at  | <i>CHCHD5</i>            | -2.9533057 | -1.5623307 | 2.9533057 | down | chr2:113342035-113346617 (+) // 94.91 // q13    |
| 227584_at    | <i>NAV1</i>              | -2.9527535 | -1.562061  | 2.9527535 | down | chr1:201794763-201796097 (+) // 74.32 // q32.1  |
| 204480_s_at  | <i>C9orf16</i>           | -2.9524972 | -1.5619357 | 2.9524972 | down | chr9:130922634-130926202 (+) // 95.48 // q34.11 |
| 1555848_at   | <i>RBM18</i>             | -2.9521852 | -1.5617832 | 2.9521852 | down |                                                 |
| 216681_at    |                          | -2.9509587 | -1.5611837 | 2.9509587 | down | chrX:129757874-130037208 (+) // 98.46 // q26.1  |
| 213732_at    | <b><i>TCF3</i></b>       | -2.9470606 | -1.5592767 | 2.9470606 | down | chr19:1610736-1615797 (+) // 99.32 // p13.3     |
| 212459_x_at  | <i>SUCLG2</i>            | -2.9449413 | -1.5582389 | 2.9449413 | down | chr3:67425142-67705085 (-) // 86.68 // p14.1    |
| 217075_x_at  | <i>KMT2B</i>             | -2.9392083 | -1.5554276 | 2.9392083 | down | chr19:36211803-36212431 (+) // 100.0 // q13.12  |
| 204485_s_at  | <i>TOM1L1</i>            | -2.938164  | -1.554915  | 2.938164  | down | chr17:52978203-53039310 (+) // 99.59 // q22     |
| 226269_at    | <i>GDAP1</i>             | -2.9378042 | -1.5547383 | 2.9378042 | down | chr8:75276653-75279114 (+) // 98.28 // q21.11   |
| 209346_s_at  | <i>PI4K2A</i>            | -2.9371703 | -1.5544269 | 2.9371703 | down | chr10:99400470-99433843 (+) // 97.66 // q24.2   |
| 218052_s_at  | <i>ATP13A1</i>           | -2.93674   | -1.5542156 | 2.93674   | down | chr19:19756008-19772925 (-) // 100.0 // p13.11  |
| 207011_s_at  | <i>PTK7</i>              | -2.9343548 | -1.5530434 | 2.9343548 | down | chr6:43044079-43129450 (+) // 98.11 // p21.1    |
| 213589_s_at  | <i>B3GNTL1</i>           | -2.9330893 | -1.552421  | 2.9330893 | down | chr17:80901216-81009673 (-) // 97.62 // q25.3   |
| 224947_at    | <i>RNF26</i>             | -2.932937  | -1.552346  | 2.932937  | down | chr11:119205240-119208019 (+) // 94.4 // q23.3  |
| 218029_at    | <i>FAM65A</i>            | -2.9311974 | -1.5514902 | 2.9311974 | down | chr16:67573772-67580682 (+) // 99.86 // q22.1   |
| 235036_at    | <i>LIX1L//LOC1010605</i> | -2.9298909 | -1.5508469 | 2.9298909 | down | chr1:145477149-145499930 (+) // 93.48 // q21.1  |
| 232490_s_at  | <i>PRUNE</i>             | -2.9288259 | -1.5503224 | 2.9288259 | down | chr1:150980959-151006710 (+) // 99.6 // q21.3   |
| 210719_s_at  | <i>HMG20B</i>            | -2.9261665 | -1.5490118 | 2.9261665 | down | chr19:3572952-3579079 (+) // 97.4 // p13.3      |
| 1569478_s_at | <i>CTC-459F4.3//OTTI</i> | -2.922937  | -1.5474187 | 2.922937  | down | chr19:28284401-28297680 (+) // 70.2 // q11      |
| 217856_at    | <i>RBM8A</i>             | -2.9224107 | -1.547159  | 2.9224107 | down | chr1:145507623-145512986 (+) // 82.71 // q21.1  |
| 223747_x_at  | <i>WWOX</i>              | -2.9212387 | -1.5465802 | 2.9212387 | down | chr16:78133571-78134095 (+) // 100.0 // q23.1   |
| 206064_s_at  | <i>PPIL2</i>             | -2.9203746 | -1.5461534 | 2.9203746 | down | chr22:22020310-22050712 (+) // 88.57 // q11.21  |
| 221587_s_at  | <i>C19orf24</i>          | -2.9203594 | -1.5461459 | 2.9203594 | down | chr19:1275550-1279226 (+) // 90.52 // p13.3     |
| 45633_at     | <i>GINS3</i>             | -2.9197083 | -1.5458242 | 2.9197083 | down | chr16:58439296-58440047 (+) // 95.41 // q21     |
| 225246_at    | <i>STIM2</i>             | -2.9170754 | -1.5445226 | 2.9170754 | down | chr4:26862564-27027003 (+) // 96.17 // p15.2    |



|             |                     |            |            |           |      |                                                  |
|-------------|---------------------|------------|------------|-----------|------|--------------------------------------------------|
| 209950_s_at | <i>VILL</i>         | -2.9170122 | -1.5444914 | 2.9170122 | down | chr3:38032287-38048675 (+) // 98.67 // p22.2     |
| 214383_x_at | <i>KLHDC3</i>       | -2.9150302 | -1.5435108 | 2.9150302 | down | chr6:42986445-42989028 (+) // 91.56 // p21.1     |
| 230075_at   | <i>RAB39B</i>       | -2.914423  | -1.5432103 | 2.914423  | down | chrX:154487525-154488232 (-) // 95.59 // q28     |
| 231004_s_at |                     | -2.913987  | -1.5429944 | 2.913987  | down | chr3:129033613-129034178 (+) // 98.6 // q21.3    |
| 218774_at   | <i>DCPS</i>         | -2.9135349 | -1.5427706 | 2.9135349 | down | chr11:126173969-126215644 (+) // 99.31 // q24.2  |
| 208907_s_at | <i>MRPS18B</i>      | -2.9111996 | -1.5416137 | 2.9111996 | down | chr6:30585605-30593715 (+) // 84.67 // p21.33    |
| 225103_at   | <i>MRPL38</i>       | -2.9107504 | -1.5413911 | 2.9107504 | down | chr17:73894724-73906523 (-) // 79.02 // q25.1    |
| 209726_at   | <i>CA11</i>         | -2.9104962 | -1.5412651 | 2.9104962 | down | chr19:49141271-49149257 (-) // 99.93 // q13.33   |
| 211634_x_at | <i>IGHM</i>         | -2.9103718 | -1.5412035 | 2.9103718 | down | chr14:106329408-107170377 (-) // 87.05 // q32.33 |
| 213740_s_at | <i>LOC100130348</i> | -2.9086435 | -1.5403465 | 2.9086435 | down | chr11:64855420-64855874 (-) // 100.0 // q13.1    |
| 233250_x_at | <i>FOXRED2</i>      | -2.908343  | -1.5401975 | 2.908343  | down | chr22:36886073-36894238 (-) // 99.84 // q12.3    |
| 219853_at   | <i>FKRP</i>         | -2.903982  | -1.5380325 | 2.903982  | down | chr19:47249314-47261170 (+) // 90.14 // q13.32   |
| 238809_at   | <i>C5orf51</i>      | -2.9013102 | -1.5367045 | 2.9013102 | down | chr5:41904472-41911435 (-) // 87.75 // p13.1     |
| 223275_at   | <i>PRMT6</i>        | -2.8998106 | -1.5359586 | 2.8998106 | down | chr1:107599445-107601652 (+) // 97.63 // p13.3   |
| 213586_at   | <i>CDKN2D</i>       | -2.8993368 | -1.535723  | 2.8993368 | down | chr19:10677135-10679437 (+) // 98.77 // p13.2    |
| 225203_at   | <i>PPP1R16A</i>     | -2.8984365 | -1.5352749 | 2.8984365 | down | chr8:145703448-145727504 (+) // 93.88 // q24.3   |
| 1559481_at  | <i>CHIC1</i>        | -2.8960123 | -1.5340677 | 2.8960123 | down | chrX:72783344-72904244 (+) // 98.34 // q13.2     |
| 231177_at   | <i>HCFC1</i>        | -2.8910375 | -1.5315874 | 2.8910375 | down | chrX:153223232-153224169 (+) // 100.0 // q28     |
| 209771_x_at | <i>CD24</i>         | -2.890683  | -1.5314103 | 2.890683  | down | chrY:21152525-21154962 (-) // 85.81 // q11.222   |
| 214847_s_at | <i>GPSM3</i>        | -2.8824754 | -1.5273082 | 2.8824754 | down | chr6:32159031-32160683 (-) // 95.09 // p21.32    |
| 204164_at   | <i>SIPA1</i>        | -2.879665  | -1.525901  | 2.879665  | down | chr11:65408299-65418399 (+) // 96.96 // q13.1    |
| 1554609_at  | <i>LOC100287896</i> | -2.878032  | -1.5250826 | 2.878032  | down |                                                  |
| 216946_at   | <i>HLA-DOA</i>      | -2.8778064 | -1.5249696 | 2.8778064 | down | chr6:32974572-32975109 (+) // 95.1 // p21.32     |
| 225743_at   | <i>RPUSD3</i>       | -2.8759017 | -1.5240144 | 2.8759017 | down | chr3:9879533-9885700 (-) // 86.76 // p25.3       |
| 242753_x_at | <i>APIAR</i>        | -2.8754244 | -1.5237749 | 2.8754244 | down | chr4:113186887-113187987 (+) // 94.96 // q25     |
| 202801_at   | <i>PRKACA</i>       | -2.8753512 | -1.5237381 | 2.8753512 | down | chr19:14202513-14228440 (-) // 91.37 // p13.12   |
| 202338_at   | <i>TK1</i>          | -2.8740294 | -1.5230749 | 2.8740294 | down | chr17:76170180-76183131 (-) // 99.65 // q25.3    |
| 216134_at   | <i>FRMD4B</i>       | -2.8730924 | -1.5226043 | 2.8730924 | down | chr3:69224925-69362670 (+) // 51.66 // p14.1     |

|              |                      |                  |            |           |      |                                                |
|--------------|----------------------|------------------|------------|-----------|------|------------------------------------------------|
| 228855_at    | <i>NUDT7</i>         | -2.8725808       | -1.5223475 | 2.8725808 | down | chr16:77775601-77776154 (+) // 89.52 // q23.1  |
| 220773_s_at  | <i>GPHN</i>          | -2.871731        | -1.5219207 | 2.871731  | down | chr14:66975205-67647664 (+) // 100.0 // q23.3  |
| 208650_s_at  | <i>CD24</i>          | -2.870811        | -1.5214584 | 2.870811  | down | chrY:21152512-21154677 (-) // 75.65 // q11.222 |
| 204374_s_at  | <i>GALK1</i>         | -2.8689244       | -1.52051   | 2.8689244 | down | chr17:73754017-73761411 (-) // 93.32 // q25.1  |
| 207425_s_at  |                      | 9.Sep -2.8659685 | -1.5190227 | 2.8659685 | down | chr17:75315633-75496674 (+) // 98.14 // q25.3  |
| 204891_s_at  | <i>LCK</i>           | -2.8656602       | -1.5188675 | 2.8656602 | down | chr1:32716931-32751761 (+) // 92.03 // p35.1   |
| 206123_at    | <i>LLGL1</i>         | -2.8653464       | -1.5187095 | 2.8653464 | down | chr17:18128992-18147779 (+) // 91.96 // p11.2  |
| 212777_at    | <i>SOS1</i>          | -2.8652616       | -1.5186669 | 2.8652616 | down | chr2:39210922-39348096 (-) // 99.32 // p22.1   |
| 203220_s_at  | <i>TLE1</i>          | -2.8651195       | -1.5185953 | 2.8651195 | down | chr9:84198599-84303212 (-) // 98.66 // q21.32  |
| 209938_at    | <i>TADA2A</i>        | -2.8649895       | -1.5185299 | 2.8649895 | down | chr17:35771353-35837332 (+) // 98.7 // q12     |
| 220040_x_at  | <i>ZC4H2</i>         | -2.8643098       | -1.5181875 | 2.8643098 | down | chrX:64136261-64196336 (-) // 98.4 // q11.2    |
| 1553369_at   | <i>FAM129C</i>       | -2.8634577       | -1.5177583 | 2.8634577 | down | chr19:17638071-17662839 (+) // 90.55 // p13.11 |
| 215535_s_at  | <i>AGPAT1</i>        | -2.8624465       | -1.5172487 | 2.8624465 | down | chr6:32135989-32145065 (-) // 95.76 // p21.32  |
| 208651_x_at  | <i>CD24</i>          | -2.8598545       | -1.5159417 | 2.8598545 | down | chrY:21152836-21154651 (-) // 81.94 // q11.222 |
| 232249_at    | <i>FMNL3</i>         | -2.8586228       | -1.5153203 | 2.8586228 | down | chr12:50038716-50045175 (-) // 94.54 // q13.12 |
| 210105_s_at  | <i>FYN</i>           | -2.8578367       | -1.5149235 | 2.8578367 | down | chr6:111982486-112194627 (-) // 94.48 // q21   |
| 200649_at    | <i>NUCB1</i>         | -2.8553464       | -1.5136658 | 2.8553464 | down | chr19:49404040-49426525 (+) // 94.42 // q13.33 |
| 225650_at    | <i>SAMD1</i>         | -2.8552368       | -1.5136104 | 2.8552368 | down | chr19:14198651-14200801 (-) // 89.38 // p13.12 |
| 221783_at    | <i>WIZ</i>           | -2.8545098       | -1.5132431 | 2.8545098 | down | chr19:15532348-15551411 (-) // 97.16 // p13.12 |
|              |                      |                  |            |           |      | chr12:31226851-31256965 (+) // 99.74 //        |
|              |                      |                  |            |           |      | p11.21///chr12:9436318-9465925 (+) // 98.35 // |
|              |                      |                  |            |           |      | p13.31///chr12:9571070-9600751 (-) // 98.29 // |
|              |                      |                  |            |           |      | p13.31                                         |
| 210206_s_at  | <i>DDX11</i>         | -2.8526864       | -1.5123211 | 2.8526864 | down | chr2:219528614-219536699 (-) // 99.93 // q35   |
| 218861_at    | <i>RNF25</i>         | -2.8517575       | -1.5118513 | 2.8517575 | down | chr22:21922007-21978323 (+) // 95.93 // q11.21 |
| 200683_s_at  | <i>UBE2L3</i>        | -2.8499913       | -1.5109575 | 2.8499913 | down | chr18:33704094-33704241 (-) // 96.03 // q12.2  |
| 1567997_x_at |                      | -2.8464084       | -1.5091426 | 2.8464084 | down | chrX:62854847-62974993 (-) // 97.44 // q11.1   |
| 203263_s_at  | <i>ARHGEF9</i>       | -2.8440115       | -1.5079273 | 2.8440115 | down | chr19:5894685-5903788 (-) // 93.29 // p13.3    |
| 225304_s_at  | <i>FUT5//NDUFA11</i> | -2.843994        | -1.5079184 | 2.843994  | down |                                                |

|              |                           |            |            |           |      |                                                                                                    |
|--------------|---------------------------|------------|------------|-----------|------|----------------------------------------------------------------------------------------------------|
| 207280_at    | <i>RNF185-AS1</i>         | -2.8430877 | -1.5074586 | 2.8430877 | down | chr4:122996571-122998382 (+) // 97.85 //<br>q27///chr22:31601178-31602995 (-) // 92.46 //<br>q12.2 |
| 201291_s_at  | <i>TOP2A</i>              | -2.8411245 | -1.5064621 | 2.8411245 | down | chr17:38544776-38574150 (-) // 97.5 // q21.2                                                       |
| 1555569_a_at | <i>KCTD7///RABGEF1</i>    | -2.8384674 | -1.5051122 | 2.8384674 | down | chr7:66093929-66105550 (+) // 93.31 // q11.21                                                      |
| 211392_s_at  | <i>PATZ1</i>              | -2.8352675 | -1.5034848 | 2.8352675 | down | chr22:31739965-31741605 (-) // 99.94 // q12.2                                                      |
| 235091_at    | <i>PDE12</i>              | -2.8344674 | -1.5030776 | 2.8344674 | down | chr3:57542370-57545486 (-) // 96.11 // p14.3                                                       |
| 1555487_a_at | <i>ACTR3B</i>             | -2.8335369 | -1.502604  | 2.8335369 | down | chr7:152456921-152552064 (+) // 95.5 // q36.1                                                      |
| 218719_s_at  | <i>GINS3</i>              | -2.8331332 | -1.5023985 | 2.8331332 | down | chr16:58426392-58439940 (+) // 99.95 // q21                                                        |
| 220999_s_at  | <i>CYFIP2</i>             | -2.8326936 | -1.5021745 | 2.8326936 | down | chr5:156820983-156822592 (+) // 90.45 // q33.3                                                     |
| 1554279_a_at | <i>TRMT2B</i>             | -2.8322084 | -1.5019274 | 2.8322084 | down | chrX:100264339-100307084 (-) // 90.44 // q22.1                                                     |
| 218421_at    | <i>CERK</i>               | -2.8314655 | -1.5015489 | 2.8314655 | down | chr22:47080307-47082909 (-) // 87.59 // q13.31                                                     |
| 216926_s_at  | <i>MAU2</i>               | -2.8313909 | -1.501511  | 2.8313909 | down | chr19:19446526-19478992 (+) // 100.0 // p13.11                                                     |
| 216519_s_at  | <i>PROSC</i>              | -2.8313186 | -1.5014741 | 2.8313186 | down | chr8:37620112-37636318 (-) // 91.49 // p11.23                                                      |
| 238058_at    | <i>LOC150381</i>          | -2.8305268 | -1.5010706 | 2.8305268 | down | chr22:46449584-46453089 (+) // 94.49 // q13.31                                                     |
| 213954_at    | <i>FAM169A</i>            | -2.8291962 | -1.5003922 | 2.8291962 | down | chr5:74075458-74162615 (-) // 99.77 // q13.3                                                       |
| 205147_x_at  | <i>NCF4</i>               | -2.8238401 | -1.4976584 | 2.8238401 | down | chr22:37257057-37273960 (+) // 99.21 // q12.3                                                      |
| 208576_s_at  | <i>HIST1H3A///HIST1H3</i> | -2.8237429 | -1.4976087 | 2.8237429 | down | chr6:26031877-26032288 (-) // 98.78 // p22.2                                                       |
| 204308_s_at  | <i>TECPR2</i>             | -2.8226883 | -1.4970698 | 2.8226883 | down | chr14:102829299-102966511 (+) // 96.3 // q32.31                                                    |
| 228065_at    | <i>BCL9L</i>              | -2.821571  | -1.4964987 | 2.821571  | down | chr11:118766848-118768258 (-) // 95.0 // q23.3                                                     |
| 219715_s_at  | <i>TDP1</i>               | -2.8210735 | -1.4962443 | 2.8210735 | down | chr14:90429448-90509688 (+) // 98.45 // q32.11                                                     |
| 239062_at    | <i>TNRC6C-AS1</i>         | -2.8202589 | -1.4958276 | 2.8202589 | down | chr17:76103792-76105947 (-) // 64.77 // q25.3                                                      |
| 200758_s_at  | <i>NFE2L1</i>             | -2.8200142 | -1.4957025 | 2.8200142 | down | chr17:46125696-46138907 (+) // 96.61 // q21.32                                                     |
| 200675_at    | <i>CD81</i>               | -2.8183067 | -1.4948286 | 2.8183067 | down | chr11:2398552-2418626 (+) // 86.5 // p15.5                                                         |
| 224175_s_at  | <i>TRIM34///TRIM6-TR</i>  | -2.8180292 | -1.4946865 | 2.8180292 | down | chr11:5653510-5662524 (+) // 97.37 // p15.4                                                        |
| 220387_s_at  | <i>HHLA3</i>              | -2.8179724 | -1.4946575 | 2.8179724 | down |                                                                                                    |
| 211136_s_at  | <i>CLPTM1</i>             | -2.815976  | -1.4936349 | 2.815976  | down | chr19:45465216-45496592 (+) // 93.44 // q13.32                                                     |
| 202479_s_at  | <i>TRIB2</i>              | -2.8149476 | -1.493108  | 2.8149476 | down | chr2:12857947-12881530 (+) // 98.7 // p24.3                                                        |
| 230026_at    | <i>MRPL43</i>             | -2.8138118 | -1.4925258 | 2.8138118 | down | chr10:102741133-102747190 (-) // 87.79 // q24.31                                                   |

|              |                     |            |            |           |      |                                                 |
|--------------|---------------------|------------|------------|-----------|------|-------------------------------------------------|
| 1569154_a_at |                     | -2.813471  | -1.4923512 | 2.813471  | down | chr22:47077605-47078653 (+) // 58.01 // q13.31  |
| 1558826_at   | <i>ZNF831</i>       | -2.8132856 | -1.492256  | 2.8132856 | down | chr20:57767207-57831083 (+) // 98.45 // q13.32  |
| 223943_s_at  | <i>GNG2</i>         | -2.8126214 | -1.4919153 | 2.8126214 | down | chr14:52434420-52436513 (-) // 98.91 // q22.1   |
| 1559205_s_at | <i>LOC100996286</i> | -2.8110845 | -1.4911268 | 2.8110845 | down | chr4:153022139-153025872 (+) // 37.65 // q31.3  |
| 209846_s_at  | <i>BTN3A2</i>       | -2.8100107 | -1.4905756 | 2.8100107 | down | chr6:26365491-26376278 (+) // 88.24 // p22.2    |
| 204445_s_at  | <i>ALOX5</i>        | -2.8084366 | -1.4897672 | 2.8084366 | down | chr10:45869663-45941565 (+) // 88.39 // q11.21  |
| 225655_at    | <i>UHRF1</i>        | -2.8082552 | -1.4896741 | 2.8082552 | down | chr19:4910845-4962165 (+) // 95.75 // p13.3     |
| 218481_at    | <i>EXOSC5</i>       | -2.8074055 | -1.4892374 | 2.8074055 | down | chr19:41892280-41903256 (-) // 96.44 // q13.2   |
| 235039_x_at  | <i>LIN9</i>         | -2.8059494 | -1.488489  | 2.8059494 | down | chr1:226419076-226426736 (-) // 95.18 // q42.12 |
| 206232_s_at  | <i>B4GALT6</i>      | -2.8057106 | -1.4883661 | 2.8057106 | down | chr18:29204633-29264628 (-) // 92.76 // q12.1   |
| 203014_x_at  | <i>SGSM3</i>        | -2.8052263 | -1.4881172 | 2.8052263 | down | chr22:40796699-40806115 (+) // 98.14 // q13.1   |
| 225647_s_at  | <i>CTSC</i>         | -2.8031569 | -1.4870524 | 2.8031569 | down | chr11:88059253-88070910 (-) // 94.86 // q14.2   |
| 203379_at    | <i>RPS6KA1</i>      | -2.7995749 | -1.4852078 | 2.7995749 | down | chr1:26856360-26901500 (+) // 99.61 // p36.11   |
| 202178_at    | <i>PRKCZ</i>        | -2.7989593 | -1.4848905 | 2.7989593 | down | chr1:1982069-2116826 (+) // 99.45 // p36.33     |
| 218384_at    | <i>CARHSP1</i>      | -2.7968767 | -1.4838166 | 2.7968767 | down | chr16:8948770-8953193 (-) // 96.4 // p13.2      |
| 218542_at    | <i>CEP55</i>        | -2.7966297 | -1.4836892 | 2.7966297 | down | chr10:95259904-95288847 (+) // 99.78 // q23.33  |
| 236140_at    | <i>GCLM</i>         | -2.7957842 | -1.483253  | 2.7957842 | down | chr1:94353044-94353708 (-) // 57.18 // p22.1    |
| 238148_s_at  | <i>ZNF818P</i>      | -2.7923357 | -1.4814724 | 2.7923357 | down | chr19:53717655-53719351 (+) // 93.51 // q13.42  |
| 225090_at    | <i>SYVN1</i>        | -2.7922664 | -1.4814366 | 2.7922664 | down | chr11:64894750-64897793 (-) // 94.88 // q13.1   |
| 222697_s_at  | <i>ABHD10</i>       | -2.792136  | -1.4813691 | 2.792136  | down | chr3:111697843-111712051 (+) // 71.98 // q13.2  |
| 201781_s_at  | <i>AIP</i>          | -2.7919042 | -1.4812495 | 2.7919042 | down | chr11:67250509-67258574 (+) // 90.92 // q13.2   |
| 201903_at    | <i>UQCRC1</i>       | -2.7918284 | -1.4812102 | 2.7918284 | down | chr3:48636435-48647470 (-) // 99.95 // p21.31   |
| 203456_at    | <i>PRAF2</i>        | -2.791102  | -1.4808348 | 2.791102  | down | chrX:48928817-48931662 (-) // 100.0 // p11.23   |
| 241370_at    | <i>LOC286052</i>    | -2.788072  | -1.4792678 | 2.788072  | down | chr8:125318429-125318948 (-) // 41.7 // q24.13  |
| 219085_s_at  | <i>GEMIN7</i>       | -2.786425  | -1.4784154 | 2.786425  | down | chr19:45582546-45594782 (+) // 99.51 // q13.32  |
| 226436_at    | <i>RASSF4</i>       | -2.7835627 | -1.4769325 | 2.7835627 | down | chr10:45489567-45490162 (+) // 87.61 // q11.21  |
| 222958_s_at  | <i>DEPDC1</i>       | -2.7829533 | -1.4766166 | 2.7829533 | down | chr1:68941258-68962765 (-) // 90.28 // p31.2    |
| 212728_at    | <i>DLG3</i>         | -2.7826903 | -1.4764804 | 2.7826903 | down | chrX:69672154-69725336 (+) // 96.6 // q13.1     |

|              |                 |            |            |           |      |                                                 |
|--------------|-----------------|------------|------------|-----------|------|-------------------------------------------------|
| 204326_x_at  | <i>MT1X</i>     | -2.780148  | -1.4751617 | 2.780148  | down | chr16:56716400-56718107 (+) // 87.71 // q13     |
| 211052_s_at  | <i>TBCD</i>     | -2.779656  | -1.4749063 | 2.779656  | down | chr17:80709982-80900578 (+) // 98.19 // q25.3   |
| 224609_at    | <i>SLC44A2</i>  | -2.7793562 | -1.4747508 | 2.7793562 | down | chr19:10713139-10755231 (+) // 97.29 // p13.2   |
| 1554172_a_at | <i>ZMYM3</i>    | -2.7765503 | -1.4732935 | 2.7765503 | down | chrX:70469056-70474425 (-) // 91.15 // q13.1    |
| 1553959_a_at | <i>B3GALT6</i>  | -2.7721274 | -1.4709935 | 2.7721274 | down | chr1:1167644-1169560 (+) // 85.5 // p36.33      |
| 228178_s_at  |                 | -2.7712865 | -1.4705559 | 2.7712865 | down | chr16:69152171-69166473 (+) // 97.55 // q22.1   |
| 236099_at    |                 | -2.7698858 | -1.4698265 | 2.7698858 | down | chr19:42046558-42047260 (+) // 28.24 // q13.2   |
| 1553021_s_at | <i>BICD2</i>    | -2.768911  | -1.4693186 | 2.768911  | down | chr9:95475542-95527083 (-) // 100.0 // q22.31   |
| 209417_s_at  | <i>IFI35</i>    | -2.7685626 | -1.4691371 | 2.7685626 | down | chr17:41158824-41166472 (+) // 97.65 // q21.31  |
| 224522_s_at  | <i>DCAKD</i>    | -2.768525  | -1.4691175 | 2.768525  | down | chr17:43100711-43138386 (-) // 74.27 // q21.31  |
| 209129_at    | <i>TRIP6</i>    | -2.7681267 | -1.46891   | 2.7681267 | down | chr7:100464973-100471070 (+) // 97.38 // q22.1  |
| 204029_at    | <i>CELSR2</i>   | -2.7680674 | -1.4688791 | 2.7680674 | down | chr1:109792640-109818372 (+) // 98.95 // p13.3  |
| 233621_s_at  | <i>ARHGEF12</i> | -2.7668753 | -1.4682575 | 2.7668753 | down | chr11:120276641-120282539 (-) // 90.51 // q23.3 |
| 213819_s_at  | <i>FLOT1</i>    | -2.7639873 | -1.466751  | 2.7639873 | down | chr6:30698462-30709077 (+) // 97.78 // p21.33   |
| 210487_at    | <i>DNTT</i>     | -2.763333  | -1.4664094 | 2.763333  | down | chr10:98064165-98098195 (+) // 85.98 // q24.1   |
| 209449_at    | <i>LSM2</i>     | -2.7631905 | -1.466335  | 2.7631905 | down | chr6:31765325-31774726 (-) // 100.0 // p21.33   |
| 236295_s_at  | <i>NLRC3</i>    | -2.7625978 | -1.4660256 | 2.7625978 | down | chr16:3589029-3589462 (-) // 100.0 // p13.3     |
| 214505_s_at  | <i>FHL1</i>     | -2.76144   | -1.4654208 | 2.76144   | down | chrX:135249209-135292226 (+) // 95.63 // q26.3  |
| 221256_s_at  | <i>HDHD3</i>    | -2.7581758 | -1.4637145 | 2.7581758 | down | chr9:116135703-116136810 (-) // 96.85 // q32    |
| 211840_s_at  | <i>PDE4D</i>    | -2.7570698 | -1.4631358 | 2.7570698 | down | chr5:58270481-58334937 (-) // 99.89 // q11.2    |
| 212125_at    | <i>RANGAP1</i>  | -2.7563581 | -1.4627633 | 2.7563581 | down | chr22:41641616-41682215 (-) // 94.69 // q13.2   |
| 209577_at    | <i>PCYT2</i>    | -2.7538936 | -1.4614729 | 2.7538936 | down | chr17:79862201-79869262 (-) // 97.27 // q25.3   |
| 204696_s_at  | <i>CDC25A</i>   | -2.7537746 | -1.4614105 | 2.7537746 | down | chr3:48200047-48229889 (-) // 96.16 // p21.31   |
| 221011_s_at  | <i>LBH</i>      | -2.7537305 | -1.4613874 | 2.7537305 | down | chr2:30454396-30482889 (+) // 97.87 // p23.1    |
| 65086_at     | <i>YIPF2</i>    | -2.7533545 | -1.4611903 | 2.7533545 | down | chr19:11033441-11038393 (-) // 88.72 // p13.2   |
| 201714_at    | <i>TUBG1</i>    | -2.7523499 | -1.4606639 | 2.7523499 | down | chr17:40761732-40767245 (+) // 99.62 // q21.2   |
| 210585_s_at  | <i>TNPO2</i>    | -2.752315  | -1.4606457 | 2.752315  | down | chr19:12812153-12834728 (-) // 96.17 // p13.2   |
| 209582_s_at  | <i>CD200</i>    | -2.7520883 | -1.4605268 | 2.7520883 | down | chr3:112052003-112081741 (+) // 92.4 // q13.2   |

|             |                                 |            |            |           |      |                                                          |
|-------------|---------------------------------|------------|------------|-----------|------|----------------------------------------------------------|
| 46142_at    | <i>LMF1</i>                     | -2.7516863 | -1.4603161 | 2.7516863 | down | chr16:904501-920808 (-) // 93.39 // p13.3                |
| 209132_s_at | <i>COMMD4</i>                   | -2.7513623 | -1.4601462 | 2.7513623 | down | chr15:75628393-75634268 (+) // 52.41 // q24.2            |
| 216491_x_at | <i>IGHM</i>                     | -2.7507126 | -1.4598055 | 2.7507126 | down | chr14:106478108-106478400 (-) // 90.97 // q32.33         |
| 235588_at   | <i>ESCO2</i>                    | -2.7496927 | -1.4592704 | 2.7496927 | down | chr8:27632055-27634576 (+) // 98.7 // p21.1              |
| 201388_at   | <i>PSMD3</i>                    | -2.7475235 | -1.4581318 | 2.7475235 | down | chr17:38137081-38154206 (+) // 96.28 // q21.1            |
| 204149_s_at | <i>GSTM4</i>                    | -2.744892  | -1.4567493 | 2.744892  | down | chr1:110198748-110204037 (+) // 99.81 // p13.3           |
| 224676_at   | <i>TMED4</i>                    | -2.7433403 | -1.4559336 | 2.7433403 | down | chr7:44617492-44621815 (-) // 85.68 // p13               |
| 203267_s_at | <i>DRG2</i>                     | -2.742848  | -1.4556746 | 2.742848  | down | chr17:17991255-18011283 (+) // 95.92 // p11.2            |
| 209428_s_at | <i>ZFPL1</i>                    | -2.7428412 | -1.4556711 | 2.7428412 | down | chr11:64851699-64855871 (+) // 98.01 // q13.1            |
| 209424_s_at | <i>AMACR</i> /// <i>C1QTNF3</i> | -2.742272  | -1.4553716 | 2.742272  | down | chr5:33987093-34008213 (-) // 62.93 // p13.2             |
| 204999_s_at | <i>ATF5</i>                     | -2.7409096 | -1.4546547 | 2.7409096 | down | chr19:50432470-50436555 (+) // 85.96 // q13.33           |
| 202715_at   | <i>CAD</i>                      | -2.7408292 | -1.4546125 | 2.7408292 | down | chr2:27440393-27466653 (+) // 99.81 // p23.3             |
| 218169_at   | <i>VAC14</i>                    | -2.7408276 | -1.4546115 | 2.7408276 | down | chr16:70721343-70796805 (-) // 98.39 // q22.1            |
| 236604_at   | <i>BAHCC1</i>                   | -2.740707  | -1.4545481 | 2.740707  | down | chr17:79428984-79430848 (-) // 96.76 // q25.3            |
| 217787_s_at | <i>GALNT2</i>                   | -2.740233  | -1.4542985 | 2.740233  | down | chr1:230202984-230417946 (+) // 97.17 // q42.13          |
| 207836_s_at | <i>RBPMS</i>                    | -2.7363808 | -1.452269  | 2.7363808 | down | chr8:30242042-30428273 (+) // 79.61 // p12               |
| 203143_s_at | <i>KIAA0040</i>                 | -2.7361748 | -1.4521604 | 2.7361748 | down | chr1:175126122-175161929 (-) // 92.99 // q25.1           |
| 226891_at   | <i>XXYL1</i>                    | -2.7345686 | -1.4513133 | 2.7345686 | down | chr3:194789007-194790490 (-) // 50.99 // q29             |
|             |                                 |            |            |           |      | chr5:76585806-76587735 (+) // 94.46 //                   |
|             |                                 |            |            |           |      | q13.3/// <i>chr5:125880548-125930899</i> (-) // 97.14 // |
|             |                                 |            |            |           |      | q23.2                                                    |
| 208950_s_at | <i>ALDH7A1</i>                  | -2.7324662 | -1.4502037 | 2.7324662 | down | chr19:4676575-4723875 (-) // 98.72 // p13.3              |
| 231957_s_at | <i>DPP9</i>                     | -2.7322645 | -1.4500972 | 2.7322645 | down | chrX:154488083-154489073 (-) // 86.92 // q28             |
| 238695_s_at | <i>RAB39B</i>                   | -2.731194  | -1.4495318 | 2.731194  | down | chr19:572564-583487 (+) // 88.62 // p13.3                |
| 208677_s_at | <i>BSG</i>                      | -2.7300618 | -1.4489336 | 2.7300618 | down | chr22:43547552-43559248 (+) // 99.65 // q13.2            |
| 202096_s_at | <i>TSPO</i>                     | -2.729088  | -1.448419  | 2.729088  | down | chr17:648105-652591 (-) // 99.87 // p13.3                |
| 217099_s_at | <i>GEMIN4</i>                   | -2.7280946 | -1.4478936 | 2.7280946 | down | chr3:48505604-48507284 (-) // 96.39 // p21.31            |
| 221642_at   |                                 | -2.7258787 | -1.4467214 | 2.7258787 | down | chr1:166808723-166825581 (+) // 87.97 // q24.1           |
| 222564_at   | <i>POGK</i>                     | -2.7242506 | -1.4458594 | 2.7242506 | down | chr4:165998954-166034071 (-) // 84.78 // q32.3           |
| 226589_at   | <i>TMEM192</i>                  | -2.7233565 | -1.4453858 | 2.7233565 | down |                                                          |

|              |                 |            |            |           |      |                                                  |
|--------------|-----------------|------------|------------|-----------|------|--------------------------------------------------|
| 212193_s_at  | <i>LARP1</i>    | -2.7220452 | -1.4446911 | 2.7220452 | down | chr5:154134888-154194475 (+) // 95.63 // q33.2   |
| 224608_s_at  | <i>VPS25</i>    | -2.7206795 | -1.443967  | 2.7206795 | down | chr17:40925453-40931616 (+) // 96.49 // q21.31   |
| 221797_at    | <i>OXLD1</i>    | -2.7190282 | -1.4430912 | 2.7190282 | down | chr17:79632065-79633695 (-) // 78.02 // q25.3    |
| 216602_s_at  | <i>FARSA</i>    | -2.7180133 | -1.4425526 | 2.7180133 | down | chr19:13033561-13044417 (-) // 100.0 // p13.2    |
| 215990_s_at  | <i>BCL6</i>     | -2.7178912 | -1.4424877 | 2.7178912 | down | chr3:187440104-187454248 (-) // 94.52 // q27.3   |
| 228639_at    |                 | -2.7177858 | -1.4424318 | 2.7177858 | down | chrX:54473345-54474619 (+) // 74.22 // p11.22    |
| 1552667_a_at | <i>SH2D3C</i>   | -2.7174358 | -1.442246  | 2.7174358 | down | chr9:130501024-130533717 (-) // 97.51 // q34.11  |
| 218154_at    | <i>GSDMD</i>    | -2.7158906 | -1.4414254 | 2.7158906 | down | chr8:144640517-144645229 (+) // 99.94 // q24.3   |
| 200986_at    | <i>SERPING1</i> | -2.7155519 | -1.4412454 | 2.7155519 | down | chr11:57365157-57382319 (+) // 91.51 // q12.1    |
| 220353_at    | <i>FAM86C1</i>  | -2.7132292 | -1.4400109 | 2.7132292 | down | chr11:71498582-71512282 (+) // 95.59 // q13.4    |
| 222691_at    | <i>SLC35B3</i>  | -2.7093377 | -1.4379402 | 2.7093377 | down | chr6:8413302-8435784 (-) // 95.81 // p24.3       |
| 221639_x_at  | <i>HNRNPU</i>   | -2.708142  | -1.4373034 | 2.708142  | down | chr1:245016959-245027827 (+) // 96.46 // q44     |
| 216234_s_at  | <i>PRKACA</i>   | -2.7079878 | -1.4372213 | 2.7079878 | down | chr19:14208061-14218216 (-) // 85.2 // p13.12    |
| 201841_s_at  | <i>HSPB1</i>    | -2.7059836 | -1.4361532 | 2.7059836 | down | chr7:75931922-75933612 (+) // 97.8 // q11.23     |
| 207112_s_at  | <i>GAB1</i>     | -2.7058363 | -1.4360746 | 2.7058363 | down | chr4:144258266-144390603 (+) // 98.05 // q31.21  |
| 226796_at    | <i>ABHD15</i>   | -2.7056015 | -1.4359493 | 2.7056015 | down | chr17:27887690-27889792 (-) // 85.78 // q11.2    |
| 202190_at    | <i>CSTF1</i>    | -2.7048955 | -1.4355729 | 2.7048955 | down | chr20:54967618-54979107 (+) // 100.0 // q13.2    |
| 207793_s_at  | <i>EPB41</i>    | -2.7044866 | -1.4353547 | 2.7044866 | down | chr1:29213635-29443626 (+) // 98.92 // p35.3     |
| 228361_at    | <i>E2F2</i>     | -2.7043514 | -1.4352826 | 2.7043514 | down | chr1:23832921-23833838 (-) // 85.7 // p36.12     |
| 212563_at    | <i>BOP1</i>     | -2.6997857 | -1.4328449 | 2.6997857 | down | chr8:145486059-145515120 (-) // 97.33 // q24.3   |
| 219684_at    | <i>RTP4</i>     | -2.699432  | -1.4326558 | 2.699432  | down | chr3:187086175-187089367 (+) // 97.83 // q27.3   |
| 235080_at    | <i>CLUAP1</i>   | -2.6984332 | -1.432122  | 2.6984332 | down | chr16:3588597-3590046 (+) // 75.79 // p13.3      |
| 228277_at    | <i>FBXL19</i>   | -2.6979606 | -1.4318693 | 2.6979606 | down | chr16:30953714-30960104 (+) // 99.05 // p11.2    |
| 218504_at    | <i>FAHD2A</i>   | -2.6975963 | -1.4316745 | 2.6975963 | down | chr2:96068447-96078879 (+) // 99.69 // q11.1     |
| 221224_s_at  | <i>DCAKD</i>    | -2.6965475 | -1.4311135 | 2.6965475 | down | chr17:43111222-43129029 (-) // 69.85 // q21.31   |
| 218938_at    | <i>FBXL15</i>   | -2.6957018 | -1.430661  | 2.6957018 | down | chr10:104180812-104182893 (+) // 91.88 // q24.32 |
| 218026_at    | <i>COA3</i>     | -2.6954463 | -1.4305241 | 2.6954463 | down | chr17:40949652-40950824 (-) // 96.6 // q21.31    |
| 201246_s_at  | <i>OTUB1</i>    | -2.695214  | -1.4303999 | 2.695214  | down | chr11:63753884-63765887 (+) // 96.74 // q13.1    |

|              |                  |       |            |            |           |      |                                                 |
|--------------|------------------|-------|------------|------------|-----------|------|-------------------------------------------------|
| 232581_x_at  | <i>HIVEP3</i>    |       | -2.695137  | -1.4303586 | 2.695137  | down | chr1:41975881-42048139 (-) // 99.82 // p34.2    |
| 212281_s_at  | <i>TMEM97</i>    |       | -2.6942868 | -1.4299034 | 2.6942868 | down | chr17:26646128-26655404 (+) // 84.6 // q11.2    |
| 203686_at    | <i>MPG</i>       |       | -2.6930413 | -1.4292364 | 2.6930413 | down | chr16:129146-135841 (+) // 91.43 // p13.3       |
| 223583_at    | <i>TNFAIP8L2</i> |       | -2.6928058 | -1.4291102 | 2.6928058 | down | chr1:151129124-151132225 (+) // 98.63 // q21.3  |
| 206506_s_at  | <i>SUPT3H</i>    |       | -2.6926062 | -1.4290032 | 2.6926062 | down | chr6:44797449-45345575 (-) // 96.74 // p21.1    |
| 1557129_a_at | <i>FAM111B</i>   |       | -2.692239  | -1.4288065 | 2.692239  | down | chr11:58874666-58892476 (+) // 90.65 // q12.1   |
| 207559_s_at  | <i>ZMYM3</i>     |       | -2.691047  | -1.4281676 | 2.691047  | down | chrX:70459473-70473946 (-) // 100.0 // q13.1    |
| 1555227_a_at | <i>MANEA</i>     |       | -2.6903758 | -1.4278077 | 2.6903758 | down | chr6:96025418-96044696 (+) // 97.44 // q16.1    |
| 218251_at    | <i>MID1IP1</i>   |       | -2.6899912 | -1.4276015 | 2.6899912 | down | chrX:38663471-38665696 (+) // 97.49 // p11.4    |
| 201809_s_at  | <i>ENG</i>       |       | -2.6899378 | -1.4275728 | 2.6899378 | down | chr9:130577295-130616984 (-) // 98.38 // q34.11 |
| 244430_at    | <i>PLD6</i>      |       | -2.6895397 | -1.4273592 | 2.6895397 | down | chr17:17106182-17109496 (+) // 97.11 // p11.2   |
| 228391_at    | <i>CYP4V2</i>    |       | -2.6895022 | -1.4273392 | 2.6895022 | down | chr4:187133962-187134612 (+) // 83.33 // q35.2  |
| 211780_x_at  | <i>DCTN1</i>     |       | -2.6893775 | -1.4272723 | 2.6893775 | down | chr2:74588281-74590524 (-) // 95.14 // p13.1    |
| 201214_s_at  | <i>PPP1R7</i>    |       | -2.6889813 | -1.4270598 | 2.6889813 | down | chr2:242089901-242122439 (+) // 99.46 // q37.3  |
| 208132_x_at  | <i>PRRC2A</i>    |       | -2.6879165 | -1.4264883 | 2.6879165 | down | chr6:31588597-31605537 (+) // 98.91 // p21.33   |
| 208657_s_at  |                  | 9.Sep | -2.6857278 | -1.4253131 | 2.6857278 | down | chr17:75316148-75496674 (+) // 98.37 // q25.3   |
| 212282_at    | <i>TMEM97</i>    |       | -2.6851907 | -1.4250245 | 2.6851907 | down | chr17:26646128-26655404 (+) // 84.6 // q11.2    |
| 201518_at    | <i>CBX1</i>      |       | -2.6844523 | -1.4246278 | 2.6844523 | down | chr17:46147422-46178800 (-) // 97.16 // q21.32  |
| 210125_s_at  | <i>BANF1</i>     |       | -2.683739  | -1.4242444 | 2.683739  | down | chr11:65769896-65771616 (+) // 96.24 // q13.1   |
| 236004_at    |                  |       | -2.6828709 | -1.4237776 | 2.6828709 | down | chr14:57764990-57765459 (+) // 63.42 // q22.3   |
| 201611_s_at  | <i>ICMT</i>      |       | -2.682429  | -1.42354   | 2.682429  | down | chr1:6281254-6296006 (-) // 89.66 // p36.31     |
| 204315_s_at  | <i>GTSE1</i>     |       | -2.6816597 | -1.4231262 | 2.6816597 | down | chr22:46693275-46727629 (+) // 82.69 // q13.31  |
| 209345_s_at  | <i>PI4K2A</i>    |       | -2.6789763 | -1.4216819 | 2.6789763 | down | chr10:99400442-99435808 (+) // 98.08 // q24.2   |
| 236312_at    |                  |       | -2.6788385 | -1.4216076 | 2.6788385 | down | chr4:120976765-120977359 (-) // 98.34 // q27    |
| 204929_s_at  | <i>VAMP5</i>     |       | -2.6778266 | -1.4210626 | 2.6778266 | down | chr2:85811556-85820499 (+) // 97.25 // p11.2    |
| 218161_s_at  | <i>CLN6</i>      |       | -2.6776314 | -1.4209573 | 2.6776314 | down | chr15:68499331-68522025 (-) // 94.39 // q23     |
| 1555974_a_at |                  |       | -2.6771922 | -1.4207207 | 2.6771922 | down | chr11:126219176-126220172 (+) // 76.08 // q24.2 |
| 216868_s_at  |                  |       | -2.677039  | -1.4206381 | 2.677039  | down | chr1:245027012-245027587 (+) // 79.09 // q44    |



|              |                |            |            |           |      |                                                 |
|--------------|----------------|------------|------------|-----------|------|-------------------------------------------------|
| 235953_at    | <i>ZNF610</i>  | -2.6764584 | -1.4203252 | 2.6764584 | down | chr19:52869659-52870375 (+) // 97.38 // q13.41  |
| 221234_s_at  | <i>BACH2</i>   | -2.676453  | -1.4203224 | 2.676453  | down | chr6:90636247-91006461 (-) // 96.74 // q15      |
| 208784_s_at  | <i>KLHDC3</i>  | -2.6750178 | -1.4195485 | 2.6750178 | down | chr6:42982003-42989028 (+) // 97.39 // p21.1    |
| 212142_at    | <i>MCM4</i>    | -2.6744897 | -1.4192637 | 2.6744897 | down | chr8:48873498-48891078 (+) // 83.89 // q11.21   |
| 213731_s_at  | <i>TCF3</i>    | -2.674292  | -1.419157  | 2.674292  | down | chr19:1610736-1615797 (+) // 99.32 // p13.3     |
| 209746_s_at  | <i>COQ7</i>    | -2.6710496 | -1.4174068 | 2.6710496 | down | chr16:19083290-19089555 (+) // 98.86 // p12.3   |
| 204021_s_at  | <i>PURA</i>    | -2.6702845 | -1.4169935 | 2.6702845 | down | chr5:139493707-139494846 (+) // 79.98 // q31.2  |
| 221588_x_at  | <i>ALDH6A1</i> | -2.669741  | -1.4166998 | 2.669741  | down | chr14:74524369-74527377 (-) // 55.59 // q24.3   |
| 221747_at    | <i>TNS1</i>    | -2.6693451 | -1.4164859 | 2.6693451 | down | chr2:218664513-218667010 (-) // 96.95 // q35    |
| 209299_x_at  | <i>PPIL2</i>   | -2.6673265 | -1.4153944 | 2.6673265 | down | chr22:22020309-22052154 (+) // 98.76 // q11.21  |
| 201706_s_at  | <i>PEX19</i>   | -2.6671388 | -1.4152929 | 2.6671388 | down | chr1:160248270-160254916 (-) // 97.53 // q23.2  |
| 242336_at    | <i>GSK3B</i>   | -2.6648164 | -1.4140362 | 2.6648164 | down | chr3:119543055-119544583 (-) // 92.93 // q13.33 |
| 209177_at    | <i>NDUFAF3</i> | -2.6643817 | -1.4138008 | 2.6643817 | down | chr3:49059523-49060720 (+) // 96.28 // p21.31   |
| 201770_at    | <i>SNRPA</i>   | -2.6632612 | -1.413194  | 2.6632612 | down | chr19:41257193-41271294 (+) // 98.51 // q13.2   |
| 202383_at    | <i>KDM5C</i>   | -2.6627855 | -1.4129362 | 2.6627855 | down | chrX:53221452-53254604 (-) // 98.87 // p11.22   |
| 1552474_a_at | <i>GAMT</i>    | -2.6621213 | -1.4125763 | 2.6621213 | down | chr19:1398451-1401552 (-) // 71.3 // p13.3      |
| 211097_s_at  | <i>PBX2</i>    | -2.6617382 | -1.4123687 | 2.6617382 | down | chr6:32154751-32157719 (-) // 93.65 // p21.32   |
| 202262_x_at  | <i>DDAH2</i>   | -2.660641  | -1.4117738 | 2.660641  | down | chr6:31694817-31698039 (-) // 98.3 // p21.33    |
| 229051_at    |                | -2.660509  | -1.4117024 | 2.660509  | down | chr17:57409049-57475064 (-) // 100.0 // q22     |
| 211706_s_at  | <i>CDK19</i>   | -2.6595297 | -1.4111711 | 2.6595297 | down | chr6:110935446-111136519 (-) // 97.45 // q21    |
| 202779_s_at  | <i>UBE2S</i>   | -2.6557105 | -1.4090979 | 2.6557105 | down | chr17:15607392-15608273 (-) // 93.71 // p12     |
| 227536_at    | <i>ZC3H13</i>  | -2.6553602 | -1.4089077 | 2.6553602 | down | chr13:46528601-46529835 (-) // 98.08 // q14.13  |
| 203809_s_at  | <i>AKT2</i>    | -2.654558  | -1.4084716 | 2.654558  | down | chr19:40739468-40791262 (-) // 93.77 // q13.2   |
| 209482_at    | <i>POP7</i>    | -2.6544569 | -1.4084166 | 2.6544569 | down | chr7:100303765-100305109 (+) // 96.84 // q22.1  |
| 1552312_a_at | <i>MFAP3</i>   | -2.6535494 | -1.4079235 | 2.6535494 | down | chr5:153418552-153434760 (+) // 89.47 // q33.2  |
| 210299_s_at  | <i>FHL1</i>    | -2.6518893 | -1.4070206 | 2.6518893 | down | chrX:135252084-135293103 (+) // 97.7 // q26.3   |
| 203478_at    | <i>NDUFC1</i>  | -2.6505456 | -1.4062893 | 2.6505456 | down | chr4:140211091-140216958 (-) // 93.42 // q31.1  |
| 228296_at    | <i>YPEL1</i>   | -2.6493535 | -1.4056404 | 2.6493535 | down | chr22:22052514-22054486 (-) // 94.72 // q11.21  |

|              |                          |            |            |           |      |                                                  |
|--------------|--------------------------|------------|------------|-----------|------|--------------------------------------------------|
| 202098_s_at  | <i>PRMT2</i>             | -2.648938  | -1.405414  | 2.648938  | down | chr21:48055566-48084856 (+) // 97.32 // q22.3    |
| 202448_s_at  | <i>ZER1</i>              | -2.6483712 | -1.4051054 | 2.6483712 | down | chr9:131492064-131534220 (-) // 96.36 // q34.11  |
| 218477_at    | <i>TMEM14A</i>           | -2.6472285 | -1.4044827 | 2.6472285 | down | chr6:52535932-52551383 (+) // 90.42 // p12.2     |
| 214484_s_at  | <i>SIGMAR1</i>           | -2.6470745 | -1.4043988 | 2.6470745 | down | chr9:34634719-34637750 (-) // 91.34 // p13.3     |
| 226017_at    | <i>CMTM7</i>             | -2.646785  | -1.404241  | 2.646785  | down | chr3:32433363-32496333 (+) // 96.96 // p22.3     |
| 209727_at    | <i>GM2A</i>              | -2.6466544 | -1.4041698 | 2.6466544 | down | chr5:150632687-150647293 (+) // 99.58 // q33.1   |
| 235878_at    | <i>OTTHUMG000001839</i>  | -2.6449776 | -1.4032555 | 2.6449776 | down | chr2:10076496-10076976 (+) // 45.84 // p25.1     |
| 203612_at    | <i>BYSL</i>              | -2.6430004 | -1.4021766 | 2.6430004 | down | chr6:41895232-41900782 (+) // 99.76 // p21.1     |
| 206445_s_at  | <i>PRMT1</i>             | -2.642825  | -1.4020808 | 2.642825  | down | chr19:50180542-50191704 (+) // 99.62 // q13.33   |
| 228258_at    | <i>TBC1D10C</i>          | -2.6420164 | -1.4016395 | 2.6420164 | down | chr11:67176576-67177559 (+) // 98.34 // q13.2    |
| 202659_at    | <i>PSMB10</i>            | -2.6388192 | -1.3998926 | 2.6388192 | down | chr16:67968408-67970740 (-) // 96.59 // q22.1    |
| 207396_s_at  | <i>ALG3</i>              | -2.6388113 | -1.3998882 | 2.6388113 | down | chr3:183960212-183966759 (-) // 97.74 // q27.1   |
| 231905_at    | <i>C20orf96</i>          | -2.638284  | -1.3995998 | 2.638284  | down | chr20:251503-271349 (-) // 91.82 // p13          |
| 201412_at    | <i>LRP10</i>             | -2.6375775 | -1.3992136 | 2.6375775 | down | chr14:23345045-23347289 (+) // 98.58 // q11.2    |
| 208682_s_at  | <i>MAGED2</i>            | -2.6366055 | -1.3986818 | 2.6366055 | down | chrX:54834195-54842319 (+) // 94.75 // p11.21    |
| 237048_at    | <i>OTTHUMG000001755</i>  | -2.6362615 | -1.3984935 | 2.6362615 | down | chrX:152864817-152865348 (+) // 88.24 // q28     |
| 223652_at    | <i>AS3MT</i>             | -2.6349082 | -1.3977528 | 2.6349082 | down | chr10:104629272-104661653 (+) // 98.21 // q24.32 |
| 1553048_a_at | <i>PIP4K2B</i>           | -2.6335788 | -1.3970246 | 2.6335788 | down | chr17:36933938-36956158 (-) // 74.43 // q12      |
| 224962_at    | <i>C9orf69</i>           | -2.6332068 | -1.3968209 | 2.6332068 | down | chr9:139006430-139010685 (-) // 95.71 // q34.3   |
| 221982_x_at  | <i>OTTHUMG000000575</i>  | -2.632803  | -1.3965995 | 2.632803  | down | chrX:153706113-153707082 (+) // 100.0 // q28     |
| 224772_at    | <i>NAV1</i>              | -2.6326694 | -1.3965265 | 2.6326694 | down | chr1:201755568-201794455 (+) // 95.64 // q32.1   |
| 208893_s_at  | <i>DUSP6</i>             | -2.6308424 | -1.3955249 | 2.6308424 | down | chr12:89742405-89746240 (-) // 99.14 // q21.33   |
| 225909_at    | <i>LOC728743///ZNF77</i> | -2.6303558 | -1.395258  | 2.6303558 | down | chr7:150097789-150109557 (+) // 75.52 // q36.1   |
| 230317_x_at  | <i>TMCO3</i>             | -2.6290693 | -1.3945522 | 2.6290693 | down | chr13:114145383-114150111 (-) // 92.52 // q34    |
| 206584_at    | <i>LY96</i>              | -2.628677  | -1.3943368 | 2.628677  | down | chr8:74903589-74941305 (+) // 93.91 // q21.11    |
| 202332_at    | <i>CSNK1E</i>            | -2.6281111 | -1.3940263 | 2.6281111 | down | chr22:38689260-38710175 (-) // 97.37 // q13.1    |
| 221520_s_at  | <i>CDCA8</i>             | -2.6264465 | -1.3931122 | 2.6264465 | down | chr1:38158158-38175234 (+) // 97.41 // p34.3     |
| 225255_at    | <i>MRPL35</i>            | -2.6257362 | -1.392722  | 2.6257362 | down | chr2:86426587-86440913 (+) // 84.91 // p11.2     |

|              |                          |            |            |           |      |                                                  |
|--------------|--------------------------|------------|------------|-----------|------|--------------------------------------------------|
| 217389_s_at  | <i>ATF5</i>              | -2.6247675 | -1.3921896 | 2.6247675 | down | chr19:50435989-50436567 (-) // 56.89 // q13.33   |
| 226456_at    | <i>RMI2</i>              | -2.6243157 | -1.3919413 | 2.6243157 | down | chr16:11439305-11445617 (+) // 85.68 // p13.13   |
| 223544_at    | <i>TMEM79</i>            | -2.6218576 | -1.3905894 | 2.6218576 | down | chr1:156252738-156262234 (+) // 96.36 // q22     |
| 236054_at    | <i>OTTHUMG000001801;</i> | -2.6210706 | -1.3901563 | 2.6210706 | down | chr18:61034560-61035092 (+) // 62.85 // q21.33   |
| 234703_at    | <i>HHLA3</i>             | -2.6204045 | -1.3897895 | 2.6204045 | down |                                                  |
| 209461_x_at  | <i>WDR18</i>             | -2.620322  | -1.389744  | 2.620322  | down | chr19:984347-994556 (+) // 97.37 // p13.3        |
| 212492_s_at  | <i>KDM4B</i>             | -2.620273  | -1.3897172 | 2.620273  | down | chr19:5131228-5153609 (+) // 91.47 // p13.3      |
| 202315_s_at  | <i>BCR</i>               | -2.6198578 | -1.3894885 | 2.6198578 | down | chr22:23522698-23658144 (+) // 94.56 // q11.23   |
| 226126_at    | <i>TBCK</i>              | -2.6189606 | -1.3889943 | 2.6189606 | down | chr4:106966828-107168423 (-) // 88.82 // q24     |
| 203922_s_at  | <i>CYBB</i>              | -2.6181045 | -1.3885226 | 2.6181045 | down | chrX:37639319-37672714 (+) // 87.46 // p11.4     |
| 223700_at    | <i>MND1</i>              | -2.6174555 | -1.388165  | 2.6174555 | down | chr4:154265861-154336058 (+) // 100.0 // q31.3   |
| 223234_at    | <i>MAD2L2</i>            | -2.616635  | -1.3877127 | 2.616635  | down | chr1:11734782-11740671 (-) // 99.0 // p36.22     |
| 202424_at    | <i>MAP2K2</i>            | -2.6158924 | -1.3873032 | 2.6158924 | down | chr19:4090321-4124126 (-) // 92.76 // p13.3      |
| 207824_s_at  | <i>MAZ</i>               | -2.6154706 | -1.3870705 | 2.6154706 | down | chr16:29817823-29821705 (+) // 76.29 // p11.2    |
| 204020_at    | <i>PURA</i>              | -2.6146638 | -1.3866254 | 2.6146638 | down | chr5:139493707-139496418 (+) // 88.32 // q31.2   |
| 226487_at    | <i>FAM222A</i>           | -2.6145854 | -1.3865821 | 2.6145854 | down | chr12:110206121-110208302 (+) // 90.16 // q24.11 |
|              |                          |            |            |           |      | chr14:61246600-61247401 (+) // 96.29 //          |
|              |                          |            |            |           |      | q23.1///chr4:120981183-120987973 (-) // 99.55 // |
|              |                          |            |            |           |      | q27                                              |
| 1554768_a_at | <i>MAD2L1</i>            | -2.6145737 | -1.3865757 | 2.6145737 | down | chr10:131862036-131878095 (-) // 85.76 // q26.3  |
| 229323_at    | <i>LINC00959</i>         | -2.614198  | -1.3863684 | 2.614198  | down | chr17:73132079-73150595 (-) // 97.16 // q25.1    |
| 217755_at    | <i>HN1</i>               | -2.6130776 | -1.38575   | 2.6130776 | down | chr5:156738671-156820233 (+) // 94.61 // q33.3   |
| 215785_s_at  | <i>CYFIP2</i>            | -2.612026  | -1.3851693 | 2.612026  | down | chr1:201103900-201123618 (-) // 93.15 // q32.1   |
| 222988_s_at  | <i>TMEM9</i>             | -2.6106672 | -1.3844186 | 2.6106672 | down | chr11:67165657-67169288 (-) // 97.38 // q13.2    |
| 200846_s_at  | <i>PPP1CA</i>            | -2.6103818 | -1.3842609 | 2.6103818 | down | chr14:70791798-70792211 (-) // 52.36 // q24.2    |
| 217645_at    | <i>COX16///SYNJ2BP-1</i> | -2.6089678 | -1.3834791 | 2.6089678 | down | chr8:99120872-99129323 (+) // 91.94 // q22.2     |
| 231705_at    | <i>HRSP12</i>            | -2.6073086 | -1.3825613 | 2.6073086 | down | chr4:83280683-83295090 (+) // 72.16 // q21.22    |
| 227744_s_at  | <i>HNRNPD</i>            | -2.6067924 | -1.3822757 | 2.6067924 | down | chr12:48735909-48736718 (-) // 49.94 // q13.11   |
| 235179_at    | <i>ZNF641</i>            | -2.60579   | -1.3817208 | 2.60579   | down | chr3:13357734-13384804 (-) // 98.4 // p25.1      |
| 212316_at    | <i>NUP210</i>            | -2.6046982 | -1.3811163 | 2.6046982 | down |                                                  |

|             |                           |            |            |           |      |                                                  |
|-------------|---------------------------|------------|------------|-----------|------|--------------------------------------------------|
| 213787_s_at | <i>EBP</i>                | -2.604602  | -1.381063  | 2.604602  | down | chrX:48382099-48386829 (+) // 94.18 // p11.23    |
| 235354_s_at | <i>RSRC1</i>              | -2.6030853 | -1.3802226 | 2.6030853 | down | chr3:158261132-158262839 (+) // 98.71 // q25.32  |
| 233000_x_at | <i>DPH3P1</i>             | -2.6012924 | -1.3792286 | 2.6012924 | down | chr20:61476480-61477543 (+) // 73.4 // q13.33    |
| 1564651_at  | <i>SMIM13</i>             | -2.5995557 | -1.3782651 | 2.5995557 | down | chr6:11094038-11135624 (+) // 56.76 // p24.2     |
| 201638_s_at | <i>CPSF1///MIR1234///</i> | -2.5992362 | -1.3780878 | 2.5992362 | down | chr8:145618445-145634709 (-) // 98.94 // q24.3   |
| 208381_s_at | <i>SGPL1</i>              | -2.599092  | -1.3780077 | 2.599092  | down | chr10:72575787-72637339 (+) // 97.98 // q22.1    |
| 219994_at   | <i>APBB1IP</i>            | -2.5990057 | -1.3779598 | 2.5990057 | down | chr10:26727306-26851564 (+) // 91.93 // p12.1    |
| 211088_s_at | <i>PLK4</i>               | -2.5982404 | -1.3775349 | 2.5982404 | down | chr4:128806975-128807112 (+) // 93.06 // q28.2   |
| 202839_s_at | <i>NDUFB7</i>             | -2.596706  | -1.3766826 | 2.596706  | down | chr19:14676914-14682835 (-) // 99.79 // p13.12   |
| 203198_at   | <i>CDK9</i>               | -2.596199  | -1.376401  | 2.596199  | down | chr9:130548362-130552097 (+) // 95.07 // q34.11  |
| 228725_x_at | <i>PRMT2</i>              | -2.5956101 | -1.3760737 | 2.5956101 | down | chr21:48055605-48069802 (+) // 95.54 // q22.3    |
| 238965_at   | <i>AP001062.7///OTTHL</i> | -2.5947287 | -1.3755838 | 2.5947287 | down | chr21:45751839-45752982 (+) // 94.28 // q22.3    |
| 1558631_at  | <i>PPARA</i>              | -2.5921702 | -1.3741604 | 2.5921702 | down | chr22:46631784-46632892 (+) // 70.69 // q13.31   |
| 221762_s_at | <i>PCIF1</i>              | -2.59177   | -1.3739376 | 2.59177   | down | chr20:44563266-44577315 (+) // 99.47 // q13.12   |
| 227316_at   | <i>PET117</i>             | -2.5898438 | -1.3728651 | 2.5898438 | down | chr20:18118581-18123486 (-) // 98.03 // p11.23   |
| 224965_at   | <i>GNG2</i>               | -2.5895495 | -1.3727012 | 2.5895495 | down | chr14:52327329-52436513 (+) // 98.31 // q22.1    |
| 227315_x_at | <i>PROSC</i>              | -2.5891786 | -1.3724945 | 2.5891786 | down | chr8:37620141-37633488 (-) // 95.71 // p11.23    |
| 201292_at   | <i>TOP2A</i>              | -2.5885916 | -1.3721673 | 2.5885916 | down | chr17:38544776-38574150 (-) // 97.5 // q21.2     |
| 76897_s_at  | <i>FKBP15</i>             | -2.5884173 | -1.3720702 | 2.5884173 | down | chr9:115968588-115969519 (-) // 94.57 // q32     |
| 222137_at   | <i>CC2D1A</i>             | -2.587754  | -1.3717005 | 2.587754  | down | chr19:14024030-14038596 (+) // 88.87 // p13.12   |
| 225355_at   | <i>NEURL1B</i>            | -2.5876117 | -1.3716211 | 2.5876117 | down | chr5:172115482-172118543 (+) // 85.99 // q35.1   |
| 209573_s_at | <i>LDLRAD4</i>            | -2.587197  | -1.37139   | 2.587197  | down | chr18:13278099-13653093 (+) // 98.8 // p11.21    |
| 215834_x_at | <i>SCARB1</i>             | -2.5863094 | -1.3708949 | 2.5863094 | down | chr12:125267055-125270992 (-) // 88.05 // q24.31 |
| 1555852_at  | <i>LOC100507463</i>       | -2.5850155 | -1.370173  | 2.5850155 | down | chr6:32812980-32815855 (+) // 73.07 // p21.32    |
| 211729_x_at | <i>BLVRA</i>              | -2.584983  | -1.3701549 | 2.584983  | down | chr7:43798278-43846938 (+) // 96.56 // p13       |
| 218664_at   | <i>MECR</i>               | -2.584879  | -1.3700967 | 2.584879  | down | chr1:29520333-29557444 (-) // 99.33 // p35.3     |
| 1569064_at  | <i>C15orf62</i>           | -2.5848756 | -1.3700949 | 2.5848756 | down | chr15:41060110-41064645 (+) // 90.9 // q15.1     |
| 227398_s_at | <i>MIDN</i>               | -2.583803  | -1.3694961 | 2.583803  | down | chr19:1254552-1257501 (-) // 94.7 // p13.3       |

|             |                          |            |            |           |      |                                                                                                                                                                                                      |
|-------------|--------------------------|------------|------------|-----------|------|------------------------------------------------------------------------------------------------------------------------------------------------------------------------------------------------------|
| 227011_at   | <i>ZNF672</i>            | -2.5836167 | -1.369392  | 2.5836167 | down | chr1:249142418-249143716 (-) // 99.92 // q44<br>chr12:9465622-9466684 (+) // 97.34 //<br>p13.31///chr12:31256662-31257725 (+) // 95.05 //<br>p11.21///chr12:9570308-9571373 (-) // 96.7 //<br>p13.31 |
| 213378_s_at | <i>DDX11///DDX12P///</i> | -2.5832498 | -1.3691871 | 2.5832498 | down | chrX:2484069-2484660 (-) // 98.01 //<br>p22.33///chrY:2434069-2434660 (-) // 98.01 //<br>p11.32                                                                                                      |
| 228742_at   |                          | -2.582587  | -1.368817  | 2.582587  | down |                                                                                                                                                                                                      |
| 218130_at   | <i>C17orf62</i>          | -2.5815861 | -1.3682578 | 2.5815861 | down | chr17:80400519-80407169 (-) // 90.5 // q25.3                                                                                                                                                         |
| 221080_s_at | <i>DENND1C</i>           | -2.580753  | -1.3677921 | 2.580753  | down | chr19:6467218-6481798 (-) // 99.29 // p13.3                                                                                                                                                          |
| 219135_s_at | <i>LMF1</i>              | -2.5784247 | -1.3664899 | 2.5784247 | down | chr16:903618-1020982 (-) // 98.85 // p13.3                                                                                                                                                           |
| 227052_at   |                          | -2.5775635 | -1.3660079 | 2.5775635 | down | chr4:39548917-39549831 (-) // 66.1 // p14                                                                                                                                                            |
| 221601_s_at | <i>FAIM3</i>             | -2.5772445 | -1.3658295 | 2.5772445 | down | chr1:207077657-207095343 (-) // 99.8 // q32.1                                                                                                                                                        |
| 242714_at   |                          | -2.57545   | -1.3648245 | 2.57545   | down | chr6:137106691-137107518 (+) // 49.16 // q23.3                                                                                                                                                       |
| 201000_at   | <i>AARS</i>              | -2.5748007 | -1.3644608 | 2.5748007 | down | chr16:70286296-70323412 (-) // 99.91 // q22.1                                                                                                                                                        |
| 212047_s_at | <i>RNF167</i>            | -2.5743685 | -1.3642186 | 2.5743685 | down | chr17:4843677-4848997 (+) // 98.58 // p13.2                                                                                                                                                          |
| 230836_at   | <i>ST8SIA4</i>           | -2.5728056 | -1.3633425 | 2.5728056 | down | chr5:100142639-100143363 (-) // 98.5 // q21.1                                                                                                                                                        |
| 213759_at   | <i>ARL4C</i>             | -2.5721698 | -1.3629858 | 2.5721698 | down | chr2:235404422-235404995 (+) // 88.48 // q37.1                                                                                                                                                       |
| 217855_x_at | <i>SDF4</i>              | -2.5712297 | -1.3624585 | 2.5712297 | down | chr1:1152311-1167411 (-) // 97.13 // p36.33                                                                                                                                                          |
| 235602_at   | <i>TP53INP1</i>          | -2.57052   | -1.3620602 | 2.57052   | down | chr8:95952160-95953319 (+) // 90.86 // q22.1                                                                                                                                                         |
| 213806_at   | <i>PURA</i>              | -2.5688336 | -1.3611134 | 2.5688336 | down | chr5:139494256-139494798 (-) // 83.81 // q31.2                                                                                                                                                       |
| 209385_s_at | <i>PROSC</i>             | -2.5683417 | -1.3608372 | 2.5683417 | down | chr8:37620124-37636435 (+) // 84.76 // p11.23                                                                                                                                                        |
| 225731_at   | <i>ANKRD50</i>           | -2.567341  | -1.360275  | 2.567341  | down | chr4:125585205-125593585 (-) // 93.91 // q28.1                                                                                                                                                       |
| 212210_at   | <i>INTS1</i>             | -2.5667834 | -1.3599615 | 2.5667834 | down | chr7:1509912-1533488 (-) // 98.16 // p22.3                                                                                                                                                           |
| 203653_s_at | <i>COIL</i>              | -2.5657434 | -1.3593769 | 2.5657434 | down | chr17:55015559-55038411 (-) // 98.98 // q22                                                                                                                                                          |
| 221879_at   | <i>CALML4</i>            | -2.5651472 | -1.3590416 | 2.5651472 | down | chr15:68486139-68498498 (-) // 86.83 // q23                                                                                                                                                          |
| 207099_s_at | <i>CHM</i>               | -2.5631514 | -1.3579186 | 2.5631514 | down | chrX:85119511-85302566 (-) // 100.0 // q21.2                                                                                                                                                         |
| 203773_x_at | <i>BLVRA</i>             | -2.5630028 | -1.357835  | 2.5630028 | down | chr7:43810733-43846936 (+) // 94.77 // p13                                                                                                                                                           |
| 213818_x_at | <i>TMEM223</i>           | -2.5627708 | -1.3577045 | 2.5627708 | down | chr11:62554972-62557636 (-) // 99.58 // q12.3                                                                                                                                                        |
| 229670_at   |                          | -2.5624936 | -1.3575484 | 2.5624936 | down | chr1:167677476-167677929 (+) // 58.28 // q24.2                                                                                                                                                       |

|              |                  |            |            |           |      |                                                 |
|--------------|------------------|------------|------------|-----------|------|-------------------------------------------------|
| 229060_at    | <i>YPEL2</i>     | -2.5615401 | -1.3570114 | 2.5615401 | down | chr17:57409049-57475064 (+) // 100.0 // q22     |
| 219680_at    | <i>NLRX1</i>     | -2.5600858 | -1.3561921 | 2.5600858 | down | chr11:119045428-119054723 (+) // 99.17 // q23.3 |
| 212023_s_at  | <i>MKI67</i>     | -2.5579305 | -1.354977  | 2.5579305 | down | chr10:129894926-129924649 (-) // 98.21 // q26.2 |
| 221912_s_at  | <i>CCDC28B</i>   | -2.5574315 | -1.3546956 | 2.5574315 | down | chr1:32666003-32670988 (+) // 95.12 // p35.1    |
| 1555815_a_at | <i>L3MBTL2</i>   | -2.5567083 | -1.3542876 | 2.5567083 | down | chr22:41601312-41626655 (+) // 99.35 // q13.2   |
| 229114_at    | <i>GAB1</i>      | -2.5556505 | -1.3536905 | 2.5556505 | down | chr4:144393988-144394654 (+) // 96.25 // q31.21 |
| 228021_at    |                  | -2.5552833 | -1.3534833 | 2.5552833 | down | chr4:1228474-1235711 (+) // 82.22 // p16.3      |
| 227941_at    | <i>LOC339803</i> | -2.5550072 | -1.3533274 | 2.5550072 | down | chr2:61368731-61372085 (-) // 41.15 // p15      |
| 224428_s_at  | <i>CDCA7</i>     | -2.5549424 | -1.3532908 | 2.5549424 | down | chr2:174219547-174233630 (+) // 99.4 // q31.1   |
| 220011_at    | <i>AUNIP</i>     | -2.55372   | -1.3526003 | 2.55372   | down | chr1:26160496-26185848 (-) // 85.3 // p36.11    |
| 1568900_a_at | <i>ZNF568</i>    | -2.552216  | -1.3517505 | 2.552216  | down | chr19:37407242-37441256 (+) // 96.53 // q13.12  |
| 207232_s_at  | <i>DZIP3</i>     | -2.5516942 | -1.3514555 | 2.5516942 | down | chr3:108321697-108410234 (+) // 97.74 // q13.13 |
| 218798_at    | <i>KRI1</i>      | -2.5511692 | -1.3511585 | 2.5511692 | down | chr19:10664266-10675683 (-) // 86.43 // p13.2   |
| 223743_s_at  | <i>MRPL4</i>     | -2.5508182 | -1.35096   | 2.5508182 | down | chr19:10362684-10369774 (+) // 79.67 // p13.2   |
| 225784_s_at  | <i>ZC4H2</i>     | -2.550445  | -1.350749  | 2.550445  | down | chrX:64135681-64254597 (-) // 86.8 // q11.2     |
| 225628_s_at  | <i>MLLT6</i>     | -2.5492158 | -1.3500535 | 2.5492158 | down | chr17:36874835-36883530 (+) // 83.63 // q12     |
| 205194_at    | <i>PSPH</i>      | -2.547211  | -1.3489184 | 2.547211  | down | chr7:56078745-56183957 (-) // 76.75 // p11.2    |
| 206124_s_at  | <i>LLGL1</i>     | -2.547189  | -1.348906  | 2.547189  | down | chr17:18128990-18146137 (+) // 97.52 // p11.2   |
| 209003_at    | <i>SLC25A11</i>  | -2.5468585 | -1.3487189 | 2.5468585 | down | chr17:4840607-4843306 (-) // 98.0 // p13.2      |
| 231422_x_at  | <i>TYSND1</i>    | -2.5467176 | -1.348639  | 2.5467176 | down | chr10:71898961-71899191 (+) // 86.92 // q22.1   |
| 212032_s_at  | <i>PTOV1</i>     | -2.546187  | -1.3483384 | 2.546187  | down | chr19:50354407-50363997 (+) // 92.73 // q13.33  |
| 239929_at    | <i>PM20D1</i>    | -2.5456765 | -1.348049  | 2.5456765 | down | chr1:205797153-205797771 (-) // 91.26 // q32.1  |
| 234140_s_at  | <i>STIM2</i>     | -2.545116  | -1.3477314 | 2.545116  | down | chr4:27004621-27025582 (+) // 92.54 // p15.2    |
| 211391_s_at  | <i>PATZ1</i>     | -2.544666  | -1.3474764 | 2.544666  | down | chr22:31722844-31740831 (-) // 55.12 // q12.2   |
| 223341_s_at  | <i>SCOC</i>      | -2.5437605 | -1.3469628 | 2.5437605 | down | chr4:141294784-141302507 (+) // 97.24 // q31.1  |
| 208581_x_at  | <i>MT1X</i>      | -2.5412815 | -1.3455561 | 2.5412815 | down | chr16:56716381-56717961 (+) // 99.61 // q13     |
| 225718_at    | <i>KIAA1715</i>  | -2.5398347 | -1.3447347 | 2.5398347 | down | chr2:176790939-176866977 (-) // 65.9 // q31.1   |
| 212393_at    | <i>SBF1</i>      | -2.5377517 | -1.3435509 | 2.5377517 | down | chr22:50885234-50913281 (-) // 98.48 // q13.33  |

|              |                         |            |            |           |      |                                                |
|--------------|-------------------------|------------|------------|-----------|------|------------------------------------------------|
| 218174_s_at  | <i>TMEM254</i>          | -2.536498  | -1.342838  | 2.536498  | down | chr10:81838425-81852303 (+) // 99.8 // q22.3   |
| 203069_at    | <i>SV2A</i>             | -2.5353346 | -1.3421762 | 2.5353346 | down | chr1:149874875-149889377 (-) // 98.64 // q21.2 |
| 209052_s_at  | <i>WHSC1</i>            | -2.532016  | -1.3402865 | 2.532016  | down | chr4:1894508-1983930 (+) // 95.93 // p16.3     |
| 227975_at    | <i>GPRIN1</i>           | -2.5311167 | -1.339774  | 2.5311167 | down | chr5:176022802-176024027 (-) // 92.76 // q35.2 |
| 217968_at    | <i>TSSC1</i>            | -2.5302024 | -1.3392528 | 2.5302024 | down | chr2:3192742-3381598 (-) // 97.54 // p25.3     |
| 233375_at    | <i>EFCAB2</i>           | -2.5292146 | -1.3386894 | 2.5292146 | down | chr1:245133691-245286263 (+) // 41.91 // q44   |
| 221759_at    | <i>G6PC3</i>            | -2.5291712 | -1.3386648 | 2.5291712 | down | chr17:42148124-42153709 (+) // 96.87 // q21.31 |
| 223229_at    | <i>UBE2T</i>            | -2.5283954 | -1.3382221 | 2.5283954 | down | chr1:202300950-202304924 (-) // 99.85 // q32.1 |
| 229884_s_at  | <i>MRPL2</i>            | -2.5274951 | -1.3377084 | 2.5274951 | down | chr6:43025677-43027118 (-) // 96.53 // p21.1   |
| 213067_at    | <i>MYH10</i>            | -2.5274138 | -1.337662  | 2.5274138 | down | chr17:8408011-8534037 (-) // 98.44 // p13.1    |
| 231840_x_at  | <i>LYRM7</i>            | -2.5267787 | -1.3372993 | 2.5267787 | down | chr5:130506635-130537031 (+) // 83.92 // q23.3 |
| 1555565_s_at | <i>TAPBP</i>            | -2.5258899 | -1.3367918 | 2.5258899 | down | chr6:33272044-33281818 (-) // 99.92 // p21.32  |
| 210966_x_at  | <i>LARP1</i>            | -2.5258672 | -1.3367788 | 2.5258672 | down | chr5:154092461-154194459 (+) // 97.32 // q33.2 |
| 201923_at    | <i>PRDX4</i>            | -2.5222178 | -1.3346928 | 2.5222178 | down | chrX:23685644-23704514 (+) // 96.2 // p22.11   |
| 238628_s_at  | <i>TRAPPC2L</i>         | -2.5220993 | -1.334625  | 2.5220993 | down | chr16:88928313-88929084 (+) // 64.27 // q24.3  |
| 1554628_at   | <i>ZNF57</i>            | -2.5220437 | -1.3345933 | 2.5220437 | down | chr19:2900943-2918472 (+) // 98.93 // p13.3    |
| 218526_s_at  | <i>RANGRF</i>           | -2.521929  | -1.3345277 | 2.521929  | down | chr17:8191996-8193405 (+) // 96.47 // p13.1    |
| 216275_at    | <i>BUB1</i>             | -2.5216668 | -1.3343776 | 2.5216668 | down | chr2:111418444-111435640 (+) // 100.0 // q13   |
| 219205_at    | <i>SRR</i>              | -2.5204806 | -1.3336989 | 2.5204806 | down | chr17:2218848-2228553 (+) // 88.98 // p13.3    |
| 219189_at    | <i>FBXL6</i>            | -2.5202968 | -1.3335936 | 2.5202968 | down | chr8:145579091-145582132 (-) // 92.2 // q24.3  |
| 206102_at    | <i>GINS1</i>            | -2.5198185 | -1.3333199 | 2.5198185 | down | chr20:25388362-25427957 (+) // 43.04 // p11.21 |
| 2028_s_at    | <i>E2F1</i>             | -2.518238  | -1.3324146 | 2.518238  | down | chr20:32263488-32274197 (-) // 93.76 // q11.22 |
| 1555759_a_at | <i>CCL5</i>             | -2.517131  | -1.3317803 | 2.517131  | down | chr17:34199350-34207312 (-) // 100.0 // q12    |
| 222916_s_at  | <i>HDLBP</i>            | -2.5168386 | -1.3316127 | 2.5168386 | down | chr2:242167315-242168858 (-) // 99.04 // q37.3 |
| 235053_at    | <i>OTTHUMG000001778</i> | -2.5168223 | -1.3316034 | 2.5168223 | down | chr17:53034031-53034720 (-) // 30.03 // q22    |
| 244684_at    |                         | -2.5166752 | -1.331519  | 2.5166752 | down | chr5:114598683-114599144 (+) // 99.57 // q22.3 |
| 211200_s_at  | <i>EFCAB2</i>           | -2.5147674 | -1.3304249 | 2.5147674 | down | chr1:27939138-27953078 (-) // 85.48 // p36.11  |
| 1567080_s_at | <i>CLN6</i>             | -2.5146382 | -1.3303509 | 2.5146382 | down | chr15:68499832-68500202 (-) // 68.65 // q23    |

|              |                           |            |            |           |      |                                                  |
|--------------|---------------------------|------------|------------|-----------|------|--------------------------------------------------|
| 214545_s_at  | <i>PROSC</i>              | -2.5112743 | -1.3284197 | 2.5112743 | down | chr8:37620177-37635819 (+) // 95.25 // p11.23    |
| 233567_at    | <i>IPO9-AS1///IPO9-A:</i> | -2.5100167 | -1.3276969 | 2.5100167 | down | chr1:201780629-201789881 (-) // 99.11 // q32.1   |
| 218565_at    | <i>C9orf114</i>           | -2.5094466 | -1.3273692 | 2.5094466 | down | chr9:131581931-131592100 (-) // 84.03 // q34.11  |
| 203772_at    | <i>BLVRA</i>              | -2.5086675 | -1.3269212 | 2.5086675 | down | chr7:43798106-43846941 (-) // 92.95 // p13       |
| 203387_s_at  | <i>TBC1D4</i>             | -2.5086656 | -1.3269202 | 2.5086656 | down | chr13:75859252-76056250 (-) // 99.05 // q22.2    |
| 220964_s_at  | <i>RAB1B</i>              | -2.5075073 | -1.3262539 | 2.5075073 | down | chr11:66036104-66044963 (+) // 95.82 // q13.2    |
| 210807_s_at  | <i>SLC16A7</i>            | -2.5072303 | -1.3260945 | 2.5072303 | down | chr12:59989987-60173770 (+) // 99.58 // q14.1    |
| 222812_s_at  | <i>RHOF</i>               | -2.5068676 | -1.3258859 | 2.5068676 | down | chr12:122217062-122231568 (-) // 98.92 // q24.31 |
| 34478_at     | <i>RAB11B</i>             | -2.5066671 | -1.3257704 | 2.5066671 | down | chr19:8454778-8468677 (+) // 76.53 // p13.2      |
| 1556316_s_at | <i>LOC284889</i>          | -2.5062118 | -1.3255084 | 2.5062118 | down | chr22:24236604-24241118 (-) // 93.41 // q11.23   |
| 221748_s_at  | <i>TNS1</i>               | -2.503343  | -1.323856  | 2.503343  | down | chr2:218664513-218667010 (-) // 96.95 // q35     |
| 226002_at    | <i>GAB1</i>               | -2.5030582 | -1.3236918 | 2.5030582 | down | chr4:144359643-144393901 (+) // 99.0 // q31.21   |
| 230142_s_at  | <i>CIRBP</i>              | -2.5024214 | -1.3233247 | 2.5024214 | down | chr19:1273175-1274805 (+) // 94.39 // p13.3      |
| 207088_s_at  | <i>SLC25A11</i>           | -2.5006552 | -1.3223062 | 2.5006552 | down | chr17:4840623-4843225 (-) // 99.73 // p13.2      |
| 228226_s_at  | <i>ZNF775</i>             | -2.5005727 | -1.3222586 | 2.5005727 | down | chr7:150095088-150095719 (+) // 90.06 // q36.1   |
| 209364_at    | <i>BAD</i>                | -2.500423  | -1.3221722 | 2.500423  | down | chr11:64037301-64051883 (-) // 97.38 // q13.1    |
| 203343_at    | <i>UGDH</i>               | -2.4984484 | -1.3210324 | 2.4984484 | down | chr4:39500379-39528973 (-) // 89.59 // p14       |
| 207677_s_at  | <i>NCF4</i>               | -2.4980829 | -1.3208214 | 2.4980829 | down | chr22:37257057-37273865 (+) // 99.37 // q12.3    |
|              |                           |            |            |           |      | chr9:44869909-44870445 (+) // 94.41 //           |
|              |                           |            |            |           |      | p11.2///chr12:54472705-54473237 (-) // 91.06 //  |
|              |                           |            |            |           |      | q13.13///chr20:29521635-29522161 (-) // 97.39 // |
|              |                           |            |            |           |      | q11.21                                           |
| 241803_s_at  | <i>OTTHUMG000000132.</i>  | -2.4975643 | -1.3205218 | 2.4975643 | down | chr2:27593388-27599994 (+) // 99.95 // p23.3     |
| 200991_s_at  | <i>SNX17</i>              | -2.4974592 | -1.320461  | 2.4974592 | down | chr19:45854720-45874176 (-) // 97.83 // q13.32   |
| 213468_at    | <i>ERCC2</i>              | -2.4968526 | -1.3201107 | 2.4968526 | down | chr15:43814544-43815779 (-) // 88.21 // q15.3    |
| 215391_at    | <i>MAP1A</i>              | -2.495157  | -1.3191305 | 2.495157  | down | chr6:31610699-31612093 (+) // 98.66 // p21.33    |
| 230513_at    | <i>BAG6</i>               | -2.494353  | -1.3186657 | 2.494353  | down | chr4:39550949-39552124 (-) // 59.17 // p14       |
| 243634_at    |                           | -2.4936562 | -1.3182626 | 2.4936562 | down | chr17:7106037-7120507 (-) // 94.41 // p13.1      |
| 210684_s_at  | <i>DLG4</i>               | -2.4926066 | -1.3176552 | 2.4926066 | down | chr12:122218553-122231594 (-) // 79.39 // q24.31 |
| 1554539_a_at | <i>RHOF</i>               | -2.4917603 | -1.3171653 | 2.4917603 | down |                                                  |



|              |                                    |            |            |           |      |                                                                                                                                                             |
|--------------|------------------------------------|------------|------------|-----------|------|-------------------------------------------------------------------------------------------------------------------------------------------------------------|
| 1729_at      | <i>TRADD</i>                       | -2.4898932 | -1.3160839 | 2.4898932 | down | chr16:67188103-67193780 (-) // 88.92 // q22.1                                                                                                               |
| 1566303_s_at | <i>PPP1R11</i>                     | -2.4890566 | -1.315599  | 2.4890566 | down | chr6:30037303-30037744 (+) // 93.48 // p22.1                                                                                                                |
| 202139_at    | <i>AKR7A2</i>                      | -2.488796  | -1.315448  | 2.488796  | down | chr1:19630463-19638608 (-) // 99.47 // p36.13                                                                                                               |
| 208577_at    | <i>HIST1H3A</i> /// <i>HIST1H3</i> | -2.4879346 | -1.3149486 | 2.4879346 | down | chr6:26045638-26046049 (+) // 99.76 // p22.2<br>chr7:23520356-23520827 (+) // 97.03 //<br>p15.3/// <i>chr5:111066368-111071201</i> (-) // 95.34 //<br>q22.1 |
| 201309_x_at  | <i>NREP</i>                        | -2.4877884 | -1.3148638 | 2.4877884 | down | chr21:33641261-33651041 (+) // 94.64 // q22.11                                                                                                              |
| 229671_s_at  | <i>MIS18A</i>                      | -2.486011  | -1.3138328 | 2.486011  | down | chr13:41363731-41386579 (+) // 93.18 // q14.11                                                                                                              |
| 218653_at    | <i>SLC25A15</i>                    | -2.4858706 | -1.3137512 | 2.4858706 | down | chr17:57409049-57430885 (-) // 83.83 // q22                                                                                                                 |
| 242192_at    |                                    | -2.485192  | -1.3133574 | 2.485192  | down | chr2:110969105-110970387 (-) // 90.71 // q13                                                                                                                |
| 228614_at    | <i>LINC00116</i>                   | -2.484645  | -1.3130397 | 2.484645  | down | chr5:180217547-180230048 (-) // 96.56 // q35.3                                                                                                              |
| 201126_s_at  | <i>MGAT1</i>                       | -2.4819934 | -1.3114992 | 2.4819934 | down | chr17:47283598-47286747 (-) // 98.11 // q21.32                                                                                                              |
| 235139_at    | <i>GNGT2</i>                       | -2.4818115 | -1.3113935 | 2.4818115 | down | chr22:22040768-22052192 (+) // 97.2 // q11.21                                                                                                               |
| 217407_x_at  | <i>PPIL2</i>                       | -2.4812493 | -1.3110667 | 2.4812493 | down | chrX:48555130-48567401 (+) // 91.47 // p11.23                                                                                                               |
| 218619_s_at  | <i>SUV39H1</i>                     | -2.4804485 | -1.310601  | 2.4804485 | down | chr10:5903690-5931861 (-) // 84.05 // p15.1                                                                                                                 |
| 229058_at    | <i>ANKRD16</i>                     | -2.4795973 | -1.3101058 | 2.4795973 | down | chr3:195590235-195619452 (-) // 97.49 // q29                                                                                                                |
| 1555557_a_at | <i>TNK2</i>                        | -2.4786708 | -1.3095667 | 2.4786708 | down | chr14:91844985-91884152 (-) // 67.47 // q32.11                                                                                                              |
| 215343_at    | <i>CCDC88C</i>                     | -2.4776103 | -1.3089494 | 2.4776103 | down | chr3:10193215-10194774 (+) // 16.21 // p25.3                                                                                                                |
| 1559227_s_at | <i>VHL</i>                         | -2.4773443 | -1.3087944 | 2.4773443 | down | chr17:55334110-55339555 (+) // 54.05 // q22                                                                                                                 |
| 243579_at    | <i>MSI2</i>                        | -2.4768524 | -1.3085079 | 2.4768524 | down | chr12:6759756-6772284 (-) // 99.27 // p13.31                                                                                                                |
| 218234_at    | <i>ING4</i>                        | -2.4762294 | -1.3081449 | 2.4762294 | down | chr5:893068-918070 (+) // 98.64 // p15.33                                                                                                                   |
| 204033_at    | <i>TRIP13</i>                      | -2.474749  | -1.3072822 | 2.474749  | down | chrX:47092438-47107350 (+) // 96.55 // p11.23                                                                                                               |
| 208723_at    | <i>USP11</i>                       | -2.473875  | -1.3067726 | 2.473875  | down | chr13:21751046-21751365 (+) // 99.07 // q12.11                                                                                                              |
| 224535_s_at  | <i>MRP63</i>                       | -2.4722712 | -1.305837  | 2.4722712 | down | chr1:117653683-117654337 (-) // 88.72 // p13.1                                                                                                              |
| 242056_at    | <i>TRIM45</i>                      | -2.471306  | -1.3052737 | 2.471306  | down | chr7:21467688-21551334 (+) // 99.4 // p15.3                                                                                                                 |
| 206663_at    | <i>SP4</i>                         | -2.4698646 | -1.3044319 | 2.4698646 | down | chr6:21595783-21596300 (-) // 72.93 // p22.3                                                                                                                |
| 213665_at    | <i>SOX4</i>                        | -2.4697754 | -1.3043798 | 2.4697754 | down | chr12:57490017-57505055 (-) // 99.97 // q13.3                                                                                                               |
| 201332_s_at  | <i>STAT6</i>                       | -2.469015  | -1.3039355 | 2.469015  | down | chr3:158262452-158262917 (-) // 99.79 // q25.32                                                                                                             |
| 240712_s_at  |                                    | -2.4684336 | -1.3035958 | 2.4684336 | down |                                                                                                                                                             |

|             |                           |            |            |           |      |                                                  |
|-------------|---------------------------|------------|------------|-----------|------|--------------------------------------------------|
| 205449_at   | <i>SAC3D1</i>             | -2.4677777 | -1.3032124 | 2.4677777 | down | chr11:64808441-64812299 (+) // 96.77 // q13.1    |
| 235657_at   | <i>OTTHUMG000001635i</i>  | -2.4676552 | -1.3031408 | 2.4676552 | down | chr5:178954041-178954570 (-) // 96.89 // q35.3   |
| 238094_at   | <i>OTTHUMG000001757i</i>  | -2.4674108 | -1.302998  | 2.4674108 | down | chr1:27020617-27021214 (-) // 79.95 // p36.11    |
| 210052_s_at | <i>TPX2</i>               | -2.4670298 | -1.3027751 | 2.4670298 | down | chr20:30327130-30389295 (+) // 98.58 // q11.21   |
| 232423_at   | <i>ARSD</i>               | -2.4669466 | -1.3027265 | 2.4669466 | down | chrX:2824196-2847390 (-) // 69.57 // p22.33      |
| 200646_s_at | <i>NUCB1</i>              | -2.465689  | -1.3019909 | 2.465689  | down | chr19:49403600-49425913 (+) // 95.89 // q13.33   |
| 230003_at   | <i>SLC16A7</i>            | -2.4656441 | -1.3019645 | 2.4656441 | down | chr12:60182880-60183635 (+) // 81.08 // q14.1    |
| 1316_at     | <i>THRA</i>               | -2.4643893 | -1.3012302 | 2.4643893 | down | chr17:38219155-38246289 (+) // 97.54 // q21.1    |
| 236443_at   |                           | -2.4640594 | -1.3010371 | 2.4640594 | down | chr9:37030537-37031409 (+) // 82.59 // p13.2     |
| 201541_s_at | <i>ZNHIT1</i>             | -2.4633114 | -1.3005991 | 2.4633114 | down | chr7:100861446-100867469 (+) // 99.86 // q22.1   |
| 231564_at   | <i>OTTHUMG000000374i</i>  | -2.4627454 | -1.3002675 | 2.4627454 | down | chr1:38266186-38266708 (-) // 81.61 // p34.3     |
| 224732_at   | <i>CHTF8</i>              | -2.4622624 | -1.2999845 | 2.4622624 | down | chr16:69151912-69155398 (-) // 95.09 // q22.1    |
| 213363_at   | <i>CA5BP1</i>             | -2.4617527 | -1.2996858 | 2.4617527 | down | chrX:15720730-15721844 (+) // 98.58 // p22.2     |
| 214916_x_at | <i>IGHA1///IGHA2///IG</i> | -2.461222  | -1.2993748 | 2.461222  | down | chr14:106322170-106725718 (-) // 91.07 // q32.33 |
| 234979_at   | <i>BCDIN3D</i>            | -2.4606192 | -1.2990214 | 2.4606192 | down | chr12:50231553-50236877 (-) // 93.66 // q13.12   |
| 210988_s_at | <i>PRUNE</i>              | -2.4579804 | -1.2974734 | 2.4579804 | down | chr1:150980953-151007683 (+) // 93.9 // q21.3    |
| 228215_at   | <i>ADD3-AS1</i>           | -2.4578533 | -1.2973988 | 2.4578533 | down | chr10:111767965-111876170 (-) // 99.67 // q25.1  |
| 209208_at   | <i>MPDU1</i>              | -2.4574976 | -1.2971901 | 2.4574976 | down | chr17:7487125-7491078 (+) // 99.7 // p13.1       |
| 224241_s_at |                           | -2.4570065 | -1.2969017 | 2.4570065 | down | chr17:48458598-48474847 (+) // 91.51 // q21.33   |
| 225305_at   | <i>SLC25A29</i>           | -2.4567235 | -1.2967355 | 2.4567235 | down | chr14:100757454-100772801 (-) // 91.57 // q32.2  |
| 203022_at   | <i>RNASEH2A</i>           | -2.4554617 | -1.2959943 | 2.4554617 | down | chr19:12917438-12924340 (+) // 98.73 // p13.2    |
| 208042_at   | <i>AGGF1</i>              | -2.4554257 | -1.2959732 | 2.4554257 | down | chr5:76326280-76331876 (+) // 94.49 // q13.3     |
| 1568795_at  |                           | -2.454147  | -1.2952217 | 2.454147  | down | chr2:96986189-96987644 (-) // 85.53 // q11.2     |
| 226565_at   | <i>TMEM99</i>             | -2.453549  | -1.29487   | 2.453549  | down | chr17:38975393-38991336 (+) // 86.57 // q21.2    |
| 201500_s_at | <i>PPP1R11</i>            | -2.4535248 | -1.2948558 | 2.4535248 | down | chr6:30034988-30038106 (+) // 98.89 // p22.1     |
| 214631_at   | <i>ZBTB33</i>             | -2.4499812 | -1.2927706 | 2.4499812 | down | chrX:119387270-119389844 (+) // 98.41 // q24     |
| 209753_s_at | <i>TMPO</i>               | -2.4493618 | -1.2924058 | 2.4493618 | down | chr12:98909370-98942743 (+) // 94.91 // q23.1    |
| 219076_s_at | <i>PXMP2</i>              | -2.4474866 | -1.291301  | 2.4474866 | down | chr12:133264191-133281576 (+) // 97.75 // q24.33 |

|              |                  |            |            |           |      |                                                 |
|--------------|------------------|------------|------------|-----------|------|-------------------------------------------------|
| 225434_at    | <i>DEDD2</i>     | -2.4469883 | -1.2910073 | 2.4469883 | down | chr19:42702749-42721874 (-) // 92.62 // q13.2   |
| 217788_s_at  | <i>GALNT2</i>    | -2.4454706 | -1.2901121 | 2.4454706 | down | chr1:230203027-230417946 (+) // 98.25 // q42.13 |
| 224796_at    | <i>ASAP1</i>     | -2.445212  | -1.2899594 | 2.445212  | down | chr8:131064352-131193108 (-) // 98.11 // q24.21 |
| 1554553_s_at | <i>YIF1B</i>     | -2.444795  | -1.2897134 | 2.444795  | down | chr19:38795753-38806376 (-) // 83.18 // q13.2   |
| 209827_s_at  | <i>IL16</i>      | -2.444732  | -1.2896763 | 2.444732  | down | chr15:81587466-81602116 (+) // 84.86 // q25.1   |
| 204890_s_at  | <i>LCK</i>       | -2.4447083 | -1.2896624 | 2.4447083 | down | chr1:32739806-32751342 (+) // 99.18 // p35.1    |
| 227451_s_at  | <i>MCUR1</i>     | -2.4438856 | -1.2891767 | 2.4438856 | down | chr6:13786964-13789373 (-) // 77.09 // p23      |
| 1553101_a_at | <i>ALKBH5</i>    | -2.4434428 | -1.2889153 | 2.4434428 | down | chr17:18087181-18112831 (+) // 91.38 // p11.2   |
| 204192_at    | <i>CD37</i>      | -2.4426825 | -1.2884663 | 2.4426825 | down | chr19:49838734-49843801 (+) // 99.47 // q13.33  |
| 222701_s_at  | <i>CHCHD7</i>    | -2.4424684 | -1.2883399 | 2.4424684 | down | chr8:57124353-57131178 (+) // 80.36 // q12.1    |
| 1552660_a_at | <i>C5orf22</i>   | -2.4416516 | -1.2878573 | 2.4416516 | down | chr5:31532401-31554286 (+) // 86.99 // p13.3    |
| 203515_s_at  | <i>PMVK</i>      | -2.44094   | -1.2874367 | 2.44094   | down | chr1:154897216-154909178 (-) // 98.2 // q21.3   |
| 1568777_at   | <i>EML5</i>      | -2.4401016 | -1.2869412 | 2.4401016 | down | chr14:89081178-89151469 (-) // 99.43 // q31.3   |
| 218300_at    | <i>PAGR1</i>     | -2.4400213 | -1.2868937 | 2.4400213 | down | chr16:29827831-29831434 (+) // 97.1 // p11.2    |
| 214127_s_at  | <i>SRRT</i>      | -2.440011  | -1.2868876 | 2.440011  | down | chr7:100472935-100479839 (-) // 99.33 // q22.1  |
| 204386_s_at  | <i>MRP63</i>     | -2.4397812 | -1.2867517 | 2.4397812 | down | chr13:21750849-21752144 (+) // 74.83 // q12.11  |
| 231727_s_at  | <i>MIF4GD</i>    | -2.4366815 | -1.2849177 | 2.4366815 | down | chr17:73262427-73266329 (-) // 79.81 // q25.1   |
| 204535_s_at  | <i>REST</i>      | -2.4366267 | -1.2848852 | 2.4366267 | down | chr4:57774074-57800857 (+) // 90.38 // q12      |
| 218745_x_at  | <i>TMEM161A</i>  | -2.4346073 | -1.283689  | 2.4346073 | down | chr19:19230430-19249267 (-) // 98.83 // p13.11  |
| 219294_at    | <i>CENPQ</i>     | -2.433066  | -1.2827754 | 2.433066  | down | chr6:49448677-49460813 (+) // 99.92 // p12.3    |
| 211342_x_at  | <i>MED12</i>     | -2.4325457 | -1.2824669 | 2.4325457 | down | chrX:70349650-70362297 (+) // 57.02 // q13.1    |
| 223312_at    | <i>PRADC1</i>    | -2.4312851 | -1.2817191 | 2.4312851 | down | chr2:73455135-73460356 (-) // 95.57 // p13.2    |
| 242489_at    | <i>LOC646778</i> | -2.4293485 | -1.2805694 | 2.4293485 | down | chr18:29268422-29268924 (+) // 54.81 // q12.1   |
| 235010_at    | <i>ZBED5-AS1</i> | -2.4292302 | -1.2804992 | 2.4292302 | down | chr11:10879765-10900739 (+) // 29.22 // p15.3   |
| 238561_s_at  | <i>UTP23</i>     | -2.428881  | -1.2802918 | 2.428881  | down | chr8:117784182-117785428 (+) // 63.97 // q24.11 |
| 220587_s_at  | <i>MLST8</i>     | -2.428862  | -1.2802806 | 2.428862  | down | chr16:2255731-2259417 (+) // 96.93 // p13.3     |
| 213227_at    | <i>PGRMC2</i>    | -2.4286587 | -1.2801598 | 2.4286587 | down | chr4:129190404-129191837 (-) // 98.02 // q28.2  |
| 222821_s_at  | <i>GEMIN7</i>    | -2.4280827 | -1.2798176 | 2.4280827 | down | chr19:45582539-45594836 (+) // 98.94 // q13.32  |

|              |                           |            |            |           |      |                                                  |
|--------------|---------------------------|------------|------------|-----------|------|--------------------------------------------------|
| 240037_at    | <i>ITPRIPL1</i>           | -2.4274511 | -1.2794422 | 2.4274511 | down | chr2:96993642-96994079 (+) // 94.79 // q11.2     |
| 232315_at    | <i>ZNF880</i>             | -2.4270456 | -1.2792011 | 2.4270456 | down | chr19:52887222-52889044 (+) // 78.88 // q13.41   |
| 1554886_a_at | <i>MLXIP</i>              | -2.4269016 | -1.2791156 | 2.4269016 | down | chr12:122615421-122618703 (+) // 92.28 // q24.31 |
| 200825_s_at  | <i>HYOU1</i>              | -2.426604  | -1.2789388 | 2.426604  | down | chr11:118914899-118927912 (-) // 99.93 // q23.3  |
| 213043_s_at  | <i>MED24</i>              | -2.425067  | -1.2780246 | 2.425067  | down | chr17:38175356-38183158 (-) // 95.29 // q21.1    |
| 201276_at    | <i>RAB5B</i>              | -2.4242573 | -1.2775428 | 2.4242573 | down | chr12:56385990-56388478 (+) // 99.6 // q13.2     |
| 214251_s_at  | <i>NUMA1</i>              | -2.4240484 | -1.2774185 | 2.4240484 | down | chr11:71713910-71726721 (-) // 96.01 // q13.4    |
| 215726_s_at  | <i>CYB5A</i>              | -2.423563  | -1.2771297 | 2.423563  | down | chr18:71920529-71928916 (-) // 99.66 // q22.3    |
| 225661_at    | <i>IFNAR1</i>             | -2.4222813 | -1.2763664 | 2.4222813 | down | chr21:34729872-34732129 (+) // 64.53 // q22.11   |
| 225175_s_at  | <i>SLC44A2</i>            | -2.4219544 | -1.2761717 | 2.4219544 | down | chr19:10754489-10755233 (+) // 86.61 // p13.2    |
| 212891_s_at  | <i>GADD45GIP1</i>         | -2.4218726 | -1.276123  | 2.4218726 | down | chr19:13064579-13068040 (-) // 95.31 // p13.2    |
| 209494_s_at  | <i>PATZ1</i>              | -2.4217613 | -1.2760566 | 2.4217613 | down | chr22:31736664-31740831 (-) // 60.19 // q12.2    |
| 225756_at    | <i>CSNK1E</i>             | -2.4212945 | -1.2757785 | 2.4212945 | down | chr22:38686696-38687947 (-) // 84.25 // q13.1    |
| 1555751_a_at | <i>GEMIN7</i>             | -2.4210415 | -1.2756277 | 2.4210415 | down | chr19:45593372-45593768 (+) // 100.0 // q13.32   |
| 207023_x_at  | <i>KRT10</i>              | -2.4207122 | -1.2754316 | 2.4207122 | down | chr17:38974369-38978841 (-) // 81.35 // q21.2    |
| 203245_s_at  | <i>LINC00094</i>          | -2.4196653 | -1.2748075 | 2.4196653 | down | chr3:50384922-50388184 (-) // 57.77 // p21.31    |
| 201639_s_at  | <i>CPSF1///MIR1234///</i> | -2.4196365 | -1.2747903 | 2.4196365 | down | chr8:145618449-145634709 (-) // 99.93 // q24.3   |
| 1557321_a_at | <i>CAPN14</i>             | -2.4191384 | -1.2744933 | 2.4191384 | down | chr2:31395923-31456724 (-) // 88.06 // p23.1     |
| 200676_s_at  | <i>UBE2L3</i>             | -2.418464  | -1.274091  | 2.418464  | down | chr22:21922018-21978323 (+) // 99.96 // q11.21   |
| 210786_s_at  | <i>FLI1</i>               | -2.4181266 | -1.2738898 | 2.4181266 | down | chr11:128563982-128681115 (+) // 99.38 // q24.3  |
| 230766_at    | <i>GART</i>               | -2.4176888 | -1.2736286 | 2.4176888 | down | chr21:34870823-34871239 (-) // 63.61 // q22.11   |
| 205069_s_at  | <i>ARHGAP26</i>           | -2.4169235 | -1.2731718 | 2.4169235 | down | chr5:142150291-142606050 (+) // 85.16 // q31.3   |
| 230740_at    | <i>EHD3</i>               | -2.416453  | -1.2728908 | 2.416453  | down | chr2:31491850-31492316 (+) // 75.61 // p23.1     |
| 235707_at    | <i>SMIM13</i>             | -2.4161875 | -1.2727325 | 2.4161875 | down | chr6:11094538-11135498 (+) // 63.17 // p24.2     |
| 220160_s_at  | <i>KPTN</i>               | -2.4153633 | -1.2722402 | 2.4153633 | down | chr19:47978407-47987451 (-) // 91.83 // q13.32   |
| 222545_s_at  | <i>TMEM254</i>            | -2.4145873 | -1.2717766 | 2.4145873 | down | chr10:81838420-81852307 (+) // 93.45 // q22.3    |
| 212321_at    | <i>SGPL1</i>              | -2.4145114 | -1.2717313 | 2.4145114 | down | chr10:72575725-72640946 (+) // 93.41 // q22.1    |
| 200707_at    | <i>PRKCSH</i>             | -2.4143095 | -1.2716106 | 2.4143095 | down | chr19:11546467-11561780 (+) // 95.72 // p13.2    |

|              |                         |            |            |           |      |                                                 |
|--------------|-------------------------|------------|------------|-----------|------|-------------------------------------------------|
| 212955_s_at  | <i>POLR2I</i>           | -2.4138496 | -1.2713358 | 2.4138496 | down | chr19:36604615-36606173 (-) // 95.96 // q13.12  |
| 225510_at    | <i>OAF</i>              | -2.413054  | -1.2708602 | 2.413054  | down | chr11:120081482-120101041 (+) // 87.26 // q23.3 |
| 206484_s_at  | <i>XPNPEP2</i>          | -2.41248   | -1.2705171 | 2.41248   | down | chrX:128872925-128903525 (+) // 90.12 // q26.1  |
| 240054_at    |                         | -2.4121563 | -1.2703234 | 2.4121563 | down | chr16:3102123-3102582 (-) // 73.02 // p13.3     |
| 229819_at    | <i>A1BG</i>             | -2.4118388 | -1.2701335 | 2.4118388 | down | chr19:58858171-58861978 (-) // 96.16 // q13.43  |
| 233971_at    | <i>FAM166A</i>          | -2.411586  | -1.2699823 | 2.411586  | down | chr9:140135738-140139177 (-) // 98.94 // q34.3  |
| 223608_at    | <i>EFCAB2</i>           | -2.4108825 | -1.2695613 | 2.4108825 | down | chr1:245133691-245251138 (+) // 94.83 // q44    |
| 228832_at    | <i>FLJ20021</i>         | -2.4107559 | -1.2694856 | 2.4107559 | down | chr4:102269004-102270040 (+) // 96.6 // q24     |
| 218051_s_at  | <i>NT5DC2</i>           | -2.4088883 | -1.2683675 | 2.4088883 | down | chr3:52558402-52569070 (-) // 96.74 // p21.1    |
| 218164_at    | <i>SPATA20</i>          | -2.4080515 | -1.2678663 | 2.4080515 | down | chr17:48624554-48633211 (+) // 98.92 // q21.33  |
| 1554429_a_at | <i>DMWD</i>             | -2.407998  | -1.2678342 | 2.407998  | down | chr19:46287038-46289883 (-) // 99.87 // q13.32  |
| 211767_at    | <i>GINS4</i>            | -2.4077888 | -1.2677088 | 2.4077888 | down | chr8:41386745-41399898 (+) // 74.05 // p11.21   |
| 200623_s_at  | <i>CALM1///CALM2///</i> | -2.4073849 | -1.2674668 | 2.4073849 | down | chr19:47104568-47114039 (+) // 99.32 // q13.32  |
| 210514_x_at  | <i>HLA-G</i>            | -2.4063249 | -1.2668314 | 2.4063249 | down | chr6:29795597-29798557 (+) // 99.45 // p22.1    |
| 218967_s_at  | <i>PTER</i>             | -2.406173  | -1.2667403 | 2.406173  | down | chr10:16526335-16554059 (+) // 94.09 // p13     |
| 200837_at    | <i>BCAP31</i>           | -2.4043205 | -1.2656292 | 2.4043205 | down | chrX:152965955-152989880 (-) // 99.7 // q28     |
| 205153_s_at  | <i>CD40</i>             | -2.4034889 | -1.2651302 | 2.4034889 | down | chr20:44746935-44757752 (+) // 94.92 // q13.12  |
| 228432_at    | <i>RAB3IP</i>           | -2.402489  | -1.2645298 | 2.402489  | down | chr12:70149161-70188284 (-) // 95.93 // q15     |
| 1564383_s_at | <i>FLJ35934</i>         | -2.401063  | -1.2636733 | 2.401063  | down | chr17:18314472-18316113 (+) // 37.96 // p11.2   |
| 221039_s_at  | <i>ASAP1</i>            | -2.3994887 | -1.262727  | 2.3994887 | down | chr8:131065671-131066100 (-) // 94.84 // q24.21 |
| 229162_s_at  | <i>ABTB1</i>            | -2.3994367 | -1.2626958 | 2.3994367 | down | chr3:127398900-127399763 (-) // 94.89 // q21.3  |
| 59375_at     | <i>MYO15B</i>           | -2.3991976 | -1.262552  | 2.3991976 | down | chr17:73621925-73622925 (+) // 77.63 // q25.1   |
| 209640_at    | <i>PML</i>              | -2.3975282 | -1.2615478 | 2.3975282 | down | chr15:74287139-74339109 (+) // 91.04 // q24.1   |
| 230806_s_at  | <i>FAM65A</i>           | -2.3975024 | -1.2615323 | 2.3975024 | down | chr17:56408244-56408537 (-) // 49.58 // q22     |
| 221255_s_at  | <i>EMC6</i>             | -2.3973298 | -1.2614284 | 2.3973298 | down | chr17:3572108-3572958 (+) // 96.88 // p13.2     |
| 211272_s_at  | <i>DGKA</i>             | -2.3964293 | -1.2608863 | 2.3964293 | down | chr12:56324998-56345492 (+) // 99.83 // q13.2   |
| 213180_s_at  | <i>GOSR2</i>            | -2.393122  | -1.258894  | 2.393122  | down | chr17:45000547-45018605 (+) // 99.13 // q21.32  |
| 218753_at    | <i>XKR8</i>             | -2.3928614 | -1.2587368 | 2.3928614 | down | chr1:28293248-28294604 (+) // 95.5 // p35.3     |

|              |                          |            |            |           |      |                                                                                                |
|--------------|--------------------------|------------|------------|-----------|------|------------------------------------------------------------------------------------------------|
| 221258_s_at  | <i>KIF18A</i>            | -2.3921213 | -1.2582905 | 2.3921213 | down | chr11:28042549-28129693 (-) // 99.7 // p14.1                                                   |
| 223553_s_at  | <i>DOK3</i>              | -2.391622  | -1.2579894 | 2.391622  | down | chr5:176928907-176937386 (-) // 43.11 // q35.3                                                 |
| 224977_at    | <i>C6orf89</i>           | -2.3914719 | -1.2578988 | 2.3914719 | down | chr6:36867201-36894325 (+) // 90.68 // p21.2                                                   |
| 219539_at    | <i>GEMIN6</i>            | -2.3905582 | -1.2573476 | 2.3905582 | down | chr2:39005358-39009107 (+) // 94.03 // p22.1                                                   |
| 210625_s_at  | <i>AKAP1</i>             | -2.390169  | -1.2571125 | 2.390169  | down | chr17:55174086-55191931 (+) // 99.79 // q22                                                    |
| 209372_x_at  | <i>TUBB2A///TUBB2B</i>   | -2.3901262 | -1.2570869 | 2.3901262 | down | chr6:3224508-3227969 (-) // 96.67 // p25.2                                                     |
| 230185_at    | <i>THAP9</i>             | -2.3900857 | -1.2570623 | 2.3900857 | down | chr4:83840650-83841429 (+) // 98.98 // q21.22                                                  |
|              |                          |            |            |           |      | chr11:64011955-64014240 (+) // 89.15 // q13.1///chr4:140035781-140036617 (+) // 87.16 // q31.1 |
| 226138_s_at  |                          | -2.3896422 | -1.2567947 | 2.3896422 | down |                                                                                                |
| 1554566_at   | <i>KCTD17</i>            | -2.3882961 | -1.2559817 | 2.3882961 | down | chr22:37447795-37459427 (+) // 85.7 // q12.3                                                   |
| 223095_at    | <i>MARVELD1</i>          | -2.3866396 | -1.2549807 | 2.3866396 | down | chr10:99473480-99477905 (+) // 91.0 // q24.2                                                   |
| 233350_s_at  | <i>TEX264</i>            | -2.386544  | -1.254923  | 2.386544  | down | chr3:51735448-51738330 (+) // 79.34 // p21.2                                                   |
| 219611_s_at  | <i>CEP85</i>             | -2.3864825 | -1.2548858 | 2.3864825 | down | chr1:26560690-26605297 (+) // 99.83 // p36.11                                                  |
| 213783_at    | <i>MFNG</i>              | -2.3854935 | -1.2542877 | 2.3854935 | down | chr22:37865624-37870632 (+) // 99.51 // q13.1                                                  |
| 1562398_at   |                          | -2.3854048 | -1.2542341 | 2.3854048 | down | chr6:135535674-135538507 (-) // 49.45 // q23.3                                                 |
| 209754_s_at  | <i>TMPO</i>              | -2.3852024 | -1.2541116 | 2.3852024 | down | chr12:98940136-98942601 (+) // 97.88 // q23.1                                                  |
| 1557262_at   | <i>OTTHUMG000001715;</i> | -2.3836923 | -1.253198  | 2.3836923 | down | chr14:24030305-24037282 (+) // 95.04 // q11.2                                                  |
| 221598_s_at  | <i>MED27</i>             | -2.3832066 | -1.252904  | 2.3832066 | down | chr9:134735498-134955253 (-) // 97.78 // q34.13                                                |
| 218212_s_at  | <i>MOCS2</i>             | -2.382581  | -1.2525252 | 2.382581  | down | chr5:52393897-52405586 (-) // 96.85 // q11.2                                                   |
| 207001_x_at  | <i>TSC22D3</i>           | -2.3823678 | -1.2523962 | 2.3823678 | down | chrX:106957699-106959631 (-) // 99.05 // q22.3                                                 |
| 214310_s_at  | <i>ZFPL1</i>             | -2.381098  | -1.251627  | 2.381098  | down | chr11:64851694-64852484 (+) // 73.01 // q13.1                                                  |
| 235523_at    | <i>CTC1</i>              | -2.3809156 | -1.2515165 | 2.3809156 | down | chr17:8129291-8129765 (-) // 84.84 // p13.1                                                    |
| 218811_at    | <i>ORAI2</i>             | -2.3806753 | -1.2513709 | 2.3806753 | down | chr7:102074032-102089163 (+) // 88.14 // q22.1                                                 |
| 207187_at    | <i>JAK3</i>              | -2.3786607 | -1.2501495 | 2.3786607 | down | chr19:17936960-17955282 (-) // 90.23 // p13.11                                                 |
| 1553301_a_at | <i>TMEM182</i>           | -2.3785994 | -1.2501123 | 2.3785994 | down | chr2:103353393-103432400 (+) // 99.88 // q12.1                                                 |
| 204226_at    | <i>STAU2</i>             | -2.3783426 | -1.2499566 | 2.3783426 | down | chr8:74461843-74659057 (-) // 97.98 // q21.11                                                  |
| 218893_at    | <i>ISOC2</i>             | -2.3774946 | -1.2494421 | 2.3774946 | down | chr19:55964355-55973012 (-) // 97.65 // q13.42                                                 |
| 216036_x_at  | <i>WDTC1</i>             | -2.3772845 | -1.2493145 | 2.3772845 | down | chr1:27587538-27634732 (+) // 99.07 // p36.11                                                  |

|             |                        |            |            |           |      |                                                 |
|-------------|------------------------|------------|------------|-----------|------|-------------------------------------------------|
| 204981_at   | <i>SLC22A18</i>        | -2.3771834 | -1.2492533 | 2.3771834 | down | chr11:2923532-2946461 (+) // 97.72 // p15.4     |
| 239072_at   | <i>EMB</i>             | -2.3771586 | -1.2492383 | 2.3771586 | down | chr5:49693509-49694451 (-) // 96.16 // q11.1    |
| 204331_s_at | <i>MRPS12</i>          | -2.3737347 | -1.2471588 | 2.3737347 | down | chr19:39421593-39423657 (+) // 83.36 // q13.2   |
| 215781_s_at | <i>TOP3B</i>           | -2.3735013 | -1.2470169 | 2.3735013 | down | chr22:22307408-22330081 (-) // 95.67 // q11.22  |
| 217223_s_at | <i>BCR</i>             | -2.3728898 | -1.2466451 | 2.3728898 | down | chr22:23540437-23657709 (+) // 100.0 // q11.23  |
| 209223_at   | <i>NDUFA2</i>          | -2.3724127 | -1.246355  | 2.3724127 | down | chr5:140024959-140027604 (-) // 95.6 // q31.3   |
| 227844_at   | <i>FMNL3</i>           | -2.371788  | -1.245975  | 2.371788  | down | chr12:50034425-50035988 (-) // 76.69 // q13.12  |
| 218537_at   | <i>HCFC1R1</i>         | -2.3706849 | -1.2453039 | 2.3706849 | down | chr16:3072632-3073948 (-) // 97.32 // p13.3     |
| 219783_at   | <i>SLC35F6</i>         | -2.3706641 | -1.2452912 | 2.3706641 | down | chr2:26987136-27001716 (+) // 98.46 // p23.3    |
| 202261_at   | <i>VPS72</i>           | -2.3701873 | -1.2450011 | 2.3701873 | down | chr1:151148933-151162640 (-) // 100.0 // q21.3  |
| 235689_at   | <i>MTFMT</i>           | -2.3688998 | -1.2442172 | 2.3688998 | down | chr15:65294915-65321939 (-) // 88.48 // q22.31  |
| 212016_s_at | <i>MIR4745///PTBP1</i> | -2.3686514 | -1.2440659 | 2.3686514 | down | chr19:797424-812525 (+) // 97.3 // p13.3        |
| 226175_at   | <i>TTC9C</i>           | -2.3685677 | -1.244015  | 2.3685677 | down | chr11:62495976-62506107 (+) // 96.11 // q12.3   |
| 208613_s_at | <i>FLNB</i>            | -2.3659027 | -1.2423908 | 2.3659027 | down | chr3:57994126-58157978 (+) // 98.99 // p14.3    |
| 212705_x_at | <i>PNPLA2</i>          | -2.3655057 | -1.2421486 | 2.3655057 | down | chr11:819626-825217 (+) // 93.2 // p15.5        |
| 213897_s_at | <i>MRPL23</i>          | -2.3651335 | -1.2419217 | 2.3651335 | down | chr11:1968573-1977826 (+) // 96.62 // p15.5     |
| 203520_s_at | <i>ZNF318</i>          | -2.3651295 | -1.2419192 | 2.3651295 | down | chr6:43303808-43337181 (-) // 97.75 // p21.1    |
| 200924_s_at | <i>SLC3A2</i>          | -2.3649838 | -1.2418302 | 2.3649838 | down | chr11:62648367-62656297 (+) // 98.07 // q12.3   |
| 210581_x_at | <i>PATZ1</i>           | -2.3645267 | -1.2415514 | 2.3645267 | down | chr22:31722844-31740831 (-) // 56.57 // q12.2   |
| 209035_at   | <i>MDK</i>             | -2.3639276 | -1.2411858 | 2.3639276 | down | chr11:46403607-46405173 (+) // 99.82 // p11.2   |
| 1554208_at  | <i>MEI1</i>            | -2.361581  | -1.2397531 | 2.361581  | down | chr22:42177402-42195460 (+) // 85.97 // q13.2   |
| 204070_at   | <i>RARRES3</i>         | -2.3614733 | -1.2396872 | 2.3614733 | down | chr11:63304279-63313929 (+) // 98.05 // q12.3   |
| 201442_s_at | <i>ATP6AP2</i>         | -2.3613317 | -1.2396007 | 2.3613317 | down | chrX:40440182-40465889 (-) // 96.68 // p11.4    |
| 213287_s_at | <i>KRT10</i>           | -2.3600874 | -1.2388403 | 2.3600874 | down | chr17:38974368-38978862 (-) // 77.2 // q21.2    |
| 223413_s_at | <i>LYAR</i>            | -2.3591435 | -1.2382631 | 2.3591435 | down | chr4:4269435-4291896 (-) // 91.05 // p16.3      |
| 227994_x_at | <i>PPDPF</i>           | -2.3589091 | -1.2381198 | 2.3589091 | down | chr20:62152136-62153517 (+) // 87.47 // q13.33  |
| 203259_s_at | <i>HDDC2</i>           | -2.358474  | -1.2378538 | 2.358474  | down | chr6:125597031-125623217 (-) // 86.78 // q22.31 |
| 202153_s_at | <i>NUP62</i>           | -2.3579748 | -1.2375484 | 2.3579748 | down | chr19:50410086-50432710 (-) // 80.09 // q13.33  |

|             |                          |            |            |           |      |                                                                                                                                                                                                                                                                                                                                                                    |
|-------------|--------------------------|------------|------------|-----------|------|--------------------------------------------------------------------------------------------------------------------------------------------------------------------------------------------------------------------------------------------------------------------------------------------------------------------------------------------------------------------|
| 202687_s_at | <i>TNFSF10</i>           | -2.3567872 | -1.2368215 | 2.3567872 | down | chr3:172224175-172241264 (-) // 99.9 // q26.31                                                                                                                                                                                                                                                                                                                     |
| 215333_x_at | <i>GSTM1</i>             | -2.3540354 | -1.235136  | 2.3540354 | down | chr1:110230465-110236366 (+) // 98.44 // p13.3                                                                                                                                                                                                                                                                                                                     |
| 223155_at   | <i>HDHD2</i>             | -2.3537886 | -1.2349848 | 2.3537886 | down | chr18:44633781-44676862 (-) // 93.12 // q21.1                                                                                                                                                                                                                                                                                                                      |
| 202770_s_at | <i>CCNG2</i>             | -2.3537831 | -1.2349814 | 2.3537831 | down | chr4:78078526-78087946 (+) // 99.61 // q21.1                                                                                                                                                                                                                                                                                                                       |
| 209215_at   | <i>MFSD10</i>            | -2.3529758 | -1.2344866 | 2.3529758 | down | chr4:2932294-2935769 (-) // 99.83 // p16.3                                                                                                                                                                                                                                                                                                                         |
| 218225_at   | <i>ECSIT</i>             | -2.3525205 | -1.2342073 | 2.3525205 | down | chr19:11616767-11630010 (-) // 99.42 // p13.2                                                                                                                                                                                                                                                                                                                      |
|             |                          |            |            |           |      | chr1:154947213-154951722 (+) // 99.86 //<br>q21.3///chr10:29986863-29987572 (+) // 98.05 //<br>p11.23///chr11:82920432-82921148 (+) // 95.26 //<br>q14.1///chr14:96689436-96690153 (+) // 95.82 //<br>q32.2///chrX:30635567-30636278 (+) // 96.65 //<br>p21.2///chr5:61807600-61808309 (-) // 96.79 //<br>q12.1///chr8:81556698-81557415 (-) // 98.05 //<br>q21.13 |
| 201897_s_at | <i>CKS1B</i>             | -2.3522065 | -1.2340147 | 2.3522065 | down | chr7:99627566-99634348 (+) // 90.4 // q22.1                                                                                                                                                                                                                                                                                                                        |
| 214670_at   | <i>ZKSCAN1</i>           | -2.3509607 | -1.2332504 | 2.3509607 | down | chr17:55693354-55760253 (+) // 94.4 // q22                                                                                                                                                                                                                                                                                                                         |
| 225237_s_at | <i>MSI2</i>              | -2.350882  | -1.2332022 | 2.350882  | down | chr6:31588496-31605537 (+) // 98.92 // p21.33                                                                                                                                                                                                                                                                                                                      |
| 212081_x_at | <i>PRRC2A</i>            | -2.3508794 | -1.2332006 | 2.3508794 | down | chr9:131084822-131085865 (+) // 67.52 // q34.11                                                                                                                                                                                                                                                                                                                    |
| 228931_at   | <i>COQ4</i>              | -2.3505404 | -1.2329925 | 2.3505404 | down | chr5:53813782-53815669 (+) // 96.88 // q11.2                                                                                                                                                                                                                                                                                                                       |
| 1552828_at  | <i>SNX18</i>             | -2.3500702 | -1.2327039 | 2.3500702 | down | chr5:68462887-68473567 (+) // 93.33 // q13.2                                                                                                                                                                                                                                                                                                                       |
| 214710_s_at | <i>CCNB1</i>             | -2.349712  | -1.2324839 | 2.349712  | down | chr17:3566340-3571872 (-) // 99.67 // p13.2                                                                                                                                                                                                                                                                                                                        |
| 215464_s_at | <i>P2RX5-TAX1BP3///1</i> | -2.3491397 | -1.2321324 | 2.3491397 | down | chr6:31847538-31860689 (-) // 97.02 // p21.33                                                                                                                                                                                                                                                                                                                      |
| 202326_at   | <i>EHMT2</i>             | -2.3488302 | -1.2319424 | 2.3488302 | down | chr10:116735384-116737435 (+) // 92.71 // q25.3                                                                                                                                                                                                                                                                                                                    |
| 226339_at   | <i>TRUB1</i>             | -2.3471816 | -1.2309295 | 2.3471816 | down | chr22:35819474-35820494 (+) // 97.45 // q12.3                                                                                                                                                                                                                                                                                                                      |
| 216237_s_at | <i>MCM5</i>              | -2.3463843 | -1.2304393 | 2.3463843 | down | chr22:17661760-17690779 (-) // 41.94 // q11.1                                                                                                                                                                                                                                                                                                                      |
| 219505_at   | <i>CECR1</i>             | -2.3457308 | -1.2300375 | 2.3457308 | down |                                                                                                                                                                                                                                                                                                                                                                    |
| 239960_x_at | <i>LYRM7</i>             | -2.3453088 | -1.2297778 | 2.3453088 | down |                                                                                                                                                                                                                                                                                                                                                                    |
| 225294_s_at | <i>TRAPPC1</i>           | -2.3450606 | -1.2296252 | 2.3450606 | down | chr17:7833666-7835240 (-) // 91.92 // p13.1                                                                                                                                                                                                                                                                                                                        |
| 209152_s_at | <i>TCF3</i>              | -2.3438752 | -1.2288957 | 2.3438752 | down | chr19:1609291-1650291 (-) // 94.42 // p13.3                                                                                                                                                                                                                                                                                                                        |
| 203391_at   | <i>FKBP2</i>             | -2.3436074 | -1.2287309 | 2.3436074 | down | chr11:64008573-64011594 (+) // 92.55 // q13.1                                                                                                                                                                                                                                                                                                                      |
| 224990_at   | <i>SMIM14</i>            | -2.341849  | -1.2276481 | 2.341849  | down | chr4:39549837-39640582 (-) // 81.08 // p14                                                                                                                                                                                                                                                                                                                         |



|              |                       |            |            |           |      |                                                 |
|--------------|-----------------------|------------|------------|-----------|------|-------------------------------------------------|
| 230857_s_at  | <i>ZNF497</i>         | -2.341435  | -1.227393  | 2.341435  | down | chr19:58865722-58866554 (-) // 56.36 // q13.43  |
| 219814_at    | <i>MBNL3</i>          | -2.3408813 | -1.2270519 | 2.3408813 | down | chrX:131513230-131547572 (-) // 100.0 // q26.2  |
| 221995_s_at  |                       | -2.3392546 | -1.226049  | 2.3392546 | down | chr13:21751298-21751901 (-) // 86.56 // q12.11  |
| 201401_s_at  | <i>ADRBK1</i>         | -2.3382874 | -1.2254522 | 2.3382874 | down | chr11:67034157-67052936 (+) // 99.86 // q13.2   |
| 231921_at    | <i>DCAF17</i>         | -2.3381205 | -1.2253493 | 2.3381205 | down | chr2:172338888-172341334 (+) // 52.69 // q31.1  |
| 225593_at    | <i>LSM10</i>          | -2.337496  | -1.2249639 | 2.337496  | down | chr1:36859032-36863719 (-) // 85.5 // p34.3     |
| 204880_at    | <i>MGMT</i>           | -2.3370633 | -1.2246969 | 2.3370633 | down | chr10:131334503-131565366 (+) // 96.36 // q26.3 |
| 1557038_s_at | <i>UBAC2-AS1</i>      | -2.336875  | -1.2245805 | 2.336875  | down | chr13:99848625-99853174 (-) // 69.61 // q32.3   |
| 218363_at    | <i>EXD2</i>           | -2.3364062 | -1.2242911 | 2.3364062 | down | chr14:69676477-69709072 (+) // 99.89 // q24.1   |
| 213489_at    | <i>MAPRE2</i>         | -2.3363779 | -1.2242736 | 2.3363779 | down | chr18:32722479-32723430 (+) // 89.49 // q12.2   |
| 221589_s_at  | <i>ALDH6A1</i>        | -2.3355412 | -1.2237569 | 2.3355412 | down | chr14:74524369-74527377 (-) // 55.59 // q24.3   |
| 227120_at    | <i>FOXP4</i>          | -2.3351717 | -1.2235286 | 2.3351717 | down | chr6:41566991-41568364 (+) // 87.92 // p21.1    |
| 217854_s_at  | <i>POLR2E</i>         | -2.33469   | -1.2232311 | 2.33469   | down | chr19:1088162-1095336 (-) // 96.49 // p13.3     |
| 1564521_x_at | <i>PRMT5</i>          | -2.3345687 | -1.2231561 | 2.3345687 | down | chr14:23389732-23398585 (-) // 78.88 // q11.2   |
| 208701_at    | <i>APLP2</i>          | -2.3341277 | -1.2228835 | 2.3341277 | down | chr11:129939785-130014700 (-) // 93.79 // q24.3 |
| 209483_s_at  | <i>NSL1</i>           | -2.3339746 | -1.2227889 | 2.3339746 | down | chr1:212910930-212965135 (+) // 97.91 // q32.3  |
| 221893_s_at  | <i>ADCK2</i>          | -2.3327758 | -1.2220477 | 2.3327758 | down | chr7:140380846-140394908 (+) // 95.11 // q34    |
| 210778_s_at  | <i>MIR4800///MXD4</i> | -2.3320909 | -1.221624  | 2.3320909 | down | chr4:2251190-2263823 (-) // 81.17 // p16.3      |
| 218190_s_at  | <i>UQCR10</i>         | -2.3315704 | -1.221302  | 2.3315704 | down | chr22:30163375-30165932 (+) // 93.65 // q12.2   |
| 228076_s_at  | <i>NOL6</i>           | -2.331165  | -1.2210511 | 2.331165  | down | chr9:33469499-33473875 (-) // 98.31 // p13.3    |
| 219003_s_at  | <i>MANEA</i>          | -2.3298254 | -1.2202219 | 2.3298254 | down | chr6:96034629-96055594 (+) // 95.1 // q16.1     |
| 208997_s_at  | <i>UCP2</i>           | -2.3292036 | -1.2198367 | 2.3292036 | down | chr11:73685965-73689511 (-) // 97.65 // q13.4   |
| 214778_at    | <i>MEGF8</i>          | -2.3287082 | -1.2195299 | 2.3287082 | down | chr19:42856580-42881580 (+) // 85.13 // q13.2   |
| 201853_s_at  | <i>CDC25B</i>         | -2.3286293 | -1.219481  | 2.3286293 | down | chr20:3776956-3786759 (+) // 94.16 // p13       |
| 204805_s_at  | <i>H1FX</i>           | -2.3278916 | -1.219024  | 2.3278916 | down | chr3:129033614-129034846 (-) // 88.31 // q21.3  |
| 200747_s_at  | <i>NUMA1</i>          | -2.3273232 | -1.2186716 | 2.3273232 | down | chr11:71713918-71791561 (-) // 98.46 // q13.4   |
| 210240_s_at  | <i>CDKN2D</i>         | -2.3269324 | -1.2184293 | 2.3269324 | down | chr19:10677528-10679329 (-) // 98.87 // p13.2   |
| 204417_at    | <i>GALC</i>           | -2.3263803 | -1.218087  | 2.3263803 | down | chr14:88399359-88459843 (-) // 88.41 // q31.3   |

|              |                 |            |            |           |      |                                                  |
|--------------|-----------------|------------|------------|-----------|------|--------------------------------------------------|
| 218954_s_at  | <i>BRF2</i>     | -2.3247933 | -1.2171025 | 2.3247933 | down | chr8:37701895-37707354 (-) // 100.0 // p11.23    |
| 1553713_a_at | <i>RHEBL1</i>   | -2.324564  | -1.2169602 | 2.324564  | down | chr12:49458327-49463789 (-) // 89.33 // q13.12   |
| 207522_s_at  | <i>ATP2A3</i>   | -2.322476  | -1.2156637 | 2.322476  | down | chr17:3827168-3867591 (-) // 99.8 // p13.2       |
| 230453_s_at  | <i>ATP2A3</i>   | -2.3214028 | -1.2149969 | 2.3214028 | down | chr17:3827304-3827807 (+) // 99.6 // p13.2       |
| 218115_at    | <i>ASF1B</i>    | -2.3211703 | -1.2148523 | 2.3211703 | down | chr19:14230342-14247429 (-) // 99.82 // p13.12   |
| 228957_at    | <i>ZNF362</i>   | -2.3210177 | -1.2147576 | 2.3210177 | down | chr1:33745880-33765047 (-) // 96.9 // p35.1      |
| 219769_at    | <i>INCENP</i>   | -2.3205786 | -1.2144846 | 2.3205786 | down | chr11:61895633-61920224 (+) // 91.06 // q12.3    |
| 227455_at    | <i>C6orf136</i> | -2.3201895 | -1.2142427 | 2.3201895 | down | chr6:30614919-30620880 (+) // 92.52 // p21.33    |
| 1552323_s_at | <i>FAM122C</i>  | -2.3195384 | -1.2138377 | 2.3195384 | down | chrX:133941222-133988621 (+) // 95.64 // q26.3   |
| 225043_at    | <i>SLC15A4</i>  | -2.3194323 | -1.2137717 | 2.3194323 | down | chr12:129277738-129299872 (-) // 98.15 // q24.32 |
| 232438_at    | <i>EPS15L1</i>  | -2.3176455 | -1.21266   | 2.3176455 | down | chr19:16466061-16513215 (-) // 96.43 // p13.11   |
| 206896_s_at  | <i>GNG7</i>     | -2.3170576 | -1.2122939 | 2.3170576 | down | chr19:2514447-2555186 (-) // 91.85 // p13.3      |
| 210502_s_at  | <i>PPIE</i>     | -2.3156185 | -1.2113975 | 2.3156185 | down | chr1:40204556-40229562 (+) // 96.0 // p34.2      |
| 223442_at    | <i>NICN1</i>    | -2.315391  | -1.2112559 | 2.315391  | down | chr3:49460379-49466674 (-) // 87.9 // p21.31     |
| 226831_at    | <i>SLC25A46</i> | -2.314889  | -1.210943  | 2.314889  | down | chr5:110100034-110100857 (+) // 97.17 // q22.1   |
| 232032_x_at  | <i>SDF4</i>     | -2.3148596 | -1.2109247 | 2.3148596 | down | chr1:1152310-1164104 (-) // 82.15 // p36.33      |
| 201350_at    | <i>FLOT2</i>    | -2.3145213 | -1.2107139 | 2.3145213 | down | chr17:27206357-27216066 (-) // 99.24 // q11.2    |
| 215967_s_at  | <i>LY9</i>      | -2.3135562 | -1.2101121 | 2.3135562 | down | chr1:160793294-160798016 (+) // 85.05 // q23.3   |
| 213056_at    | <i>FRMD4B</i>   | -2.3134222 | -1.2100285 | 2.3134222 | down | chr3:69219145-69435224 (-) // 96.4 // p14.1      |
| 230260_s_at  |                 | -2.3133547 | -1.2099866 | 2.3133547 | down | chr3:16450929-16555158 (+) // 99.84 // p24.3     |
| 229742_at    | <i>C15orf61</i> | -2.3114593 | -1.2088039 | 2.3114593 | down | chr15:67813673-67818997 (+) // 89.55 // q23      |
| 229314_at    |                 | -2.3109505 | -1.2084863 | 2.3109505 | down | chr19:35224294-35225024 (+) // 99.73 // q13.11   |
| 202111_at    | <i>SLC4A2</i>   | -2.31095   | -1.2084861 | 2.31095   | down | chr7:150759010-150773609 (+) // 98.66 // q36.1   |
| 224407_s_at  | <i>MST4</i>     | -2.3109171 | -1.2084655 | 2.3109171 | down | chrX:131157635-131208298 (+) // 100.0 // q26.2   |
| 221744_at    | <i>DCAF7</i>    | -2.3107655 | -1.2083709 | 2.3107655 | down | chr17:61666794-61669907 (+) // 89.06 // q23.3    |
| 228869_at    | <i>SNX20</i>    | -2.310401  | -1.2081432 | 2.310401  | down | chr16:50705536-50706097 (-) // 47.63 // q12.1    |
| 206569_at    | <i>IL24</i>     | -2.309745  | -1.2077336 | 2.309745  | down | chr1:207070788-207077209 (+) // 90.65 // q32.1   |
| 231244_at    | <i>CASD1</i>    | -2.3095355 | -1.2076027 | 2.3095355 | down | chr7:94139293-94156664 (-) // 100.0 // q21.3     |

|              |                        |            |            |           |      |                                                 |
|--------------|------------------------|------------|------------|-----------|------|-------------------------------------------------|
| 209113_s_at  | <i>HMG20B</i>          | -2.3091342 | -1.207352  | 2.3091342 | down | chr19:3573307-3578672 (+) // 99.19 // p13.3     |
| 202471_s_at  | <i>IDH3G</i>           | -2.3090672 | -1.2073102 | 2.3090672 | down | chrX:153051221-153059967 (-) // 97.74 // q28    |
| 210976_s_at  | <i>PFKM</i>            | -2.3089802 | -1.2072558 | 2.3089802 | down | chr12:48513125-48539887 (+) // 99.25 // q13.11  |
| 243011_at    | <i>NXPE3</i>           | -2.3083653 | -1.2068715 | 2.3083653 | down | chr3:101520406-101520833 (+) // 76.66 // q12.3  |
| 226235_at    | <i>LINC00667</i>       | -2.3071625 | -1.2061197 | 2.3071625 | down | chr18:5237888-5239389 (+) // 93.59 // p11.31    |
| 1558693_s_at | <i>C1orf85</i>         | -2.3069136 | -1.205964  | 2.3069136 | down | chr1:156259882-156262862 (-) // 54.11 // q22    |
| 238539_at    | <i>HPS3</i>            | -2.3065689 | -1.2057483 | 2.3065689 | down | chr3:148847401-148871407 (+) // 99.19 // q24    |
| 231059_x_at  | <i>SCAND1</i>          | -2.3058171 | -1.205278  | 2.3058171 | down | chr20:34541547-34542144 (-) // 93.89 // q11.23  |
| 224152_s_at  | <i>PBRM1</i>           | -2.3053286 | -1.2049724 | 2.3053286 | down | chr3:52582005-52713730 (-) // 99.56 // p21.1    |
| 203521_s_at  | <i>ZNF318</i>          | -2.304219  | -1.2042779 | 2.304219  | down | chr6:43303811-43337181 (-) // 97.55 // p21.1    |
| 213623_at    | <i>KIF3A</i>           | -2.303891  | -1.2040725 | 2.303891  | down | chr5:132031784-132073236 (-) // 96.0 // q31.1   |
| 237877_at    |                        | -2.3035028 | -1.2038293 | 2.3035028 | down | chr6:43578122-43578463 (-) // 98.84 // p21.1    |
| 206313_at    | <i>HLA-DOA</i>         | -2.3031662 | -1.2036185 | 2.3031662 | down | chr6:32974337-32977389 (-) // 100.0 // p21.32   |
| 240983_s_at  | <i>CARS</i>            | -2.3030777 | -1.2035631 | 2.3030777 | down | chr11:3047648-3048136 (-) // 86.27 // p15.4     |
| 218075_at    | <i>AAAS</i>            | -2.3026748 | -1.2033106 | 2.3026748 | down | chr12:53701239-53715339 (-) // 100.0 // q13.13  |
| 221867_at    | <i>N4BP1</i>           | -2.3019338 | -1.2028463 | 2.3019338 | down | chr16:48572638-48574636 (-) // 68.33 // q12.1   |
| 224465_s_at  | <i>WIBG</i>            | -2.3011122 | -1.2023313 | 2.3011122 | down | chr12:56295196-56321697 (-) // 96.53 // q13.2   |
|              |                        |            |            |           |      | chr14:24422972-24475610 (+) // 98.36 //         |
|              |                        |            |            |           |      | q11.2///chr14:24458131-24520579 (+) // 95.94 // |
|              |                        |            |            |           |      | q11.2                                           |
| 218021_at    | <i>DHRS4///DHRS4L2</i> | -2.2993789 | -1.2012442 | 2.2993789 | down | chrX:47495565-47509990 (-) // 97.79 // p11.23   |
| 210376_x_at  | <i>ELK1</i>            | -2.2980645 | -1.2004193 | 2.2980645 | down | chr14:52327329-52436513 (+) // 98.31 // q22.1   |
| 224964_s_at  | <i>GNG2</i>            | -2.297617  | -1.2001383 | 2.297617  | down | chr14:60558929-60574884 (-) // 99.37 // q23.1   |
| 235187_s_at  |                        | -2.297441  | -1.2000278 | 2.297441  | down | chr8:22224799-22275500 (+) // 83.59 // p21.3    |
| 1555434_a_at | <i>SLC39A14</i>        | -2.296789  | -1.1996182 | 2.296789  | down | chr19:45596410-45649938 (+) // 95.93 // q13.32  |
| 213751_at    | <i>PPP1R37</i>         | -2.2966251 | -1.1995153 | 2.2966251 | down | chr7:12275705-12276890 (+) // 97.77 // p21.3    |
| 226529_at    | <i>TMEM106B</i>        | -2.2961316 | -1.1992054 | 2.2961316 | down | chr8:37594109-37615318 (+) // 82.54 // p11.23   |
| 221542_s_at  | <i>ERLIN2</i>          | -2.2959385 | -1.1990839 | 2.2959385 | down | chr16:5134304-5134779 (-) // 79.16 // p13.3     |
| 222013_x_at  | <i>FAM86A</i>          | -2.293487  | -1.1975428 | 2.293487  | down | chr11:4406137-4411690 (-) // 97.04 // p15.4     |
| 204804_at    | <i>TRIM21</i>          | -2.2931783 | -1.1973485 | 2.2931783 | down |                                                 |

|              |                          |            |            |           |      |                                                  |
|--------------|--------------------------|------------|------------|-----------|------|--------------------------------------------------|
| 204550_x_at  | <i>GSTM1</i>             | -2.2926915 | -1.1970422 | 2.2926915 | down | chr1:110230480-110236366 (+) // 99.91 // p13.3   |
| 222585_x_at  | <i>KRCC1</i>             | -2.2923057 | -1.1967994 | 2.2923057 | down | chr2:88326724-88355372 (-) // 97.21 // p11.2     |
| 1555613_a_at | <i>ZAP70</i>             | -2.2918572 | -1.1965171 | 2.2918572 | down | chr2:98350868-98355961 (+) // 100.0 // q11.2     |
| 218302_at    | <i>PSENFEN</i>           | -2.2915277 | -1.1963097 | 2.2915277 | down | chr19:36236501-36237903 (+) // 97.62 // q13.12   |
| 229102_at    | <i>HTATIP2</i>           | -2.2911901 | -1.1960971 | 2.2911901 | down | chr11:20385304-20388984 (-) // 97.13 // p15.1    |
| 1568658_at   | <i>C2orf74//KIAA1841</i> | -2.2906902 | -1.1957823 | 2.2906902 | down | chr2:61372256-61391964 (+) // 88.39 // p15       |
| 40850_at     | <i>FKBP8</i>             | -2.2905264 | -1.1956792 | 2.2905264 | down | chr19:18642572-18654364 (-) // 91.26 // p13.11   |
| 209384_at    | <i>PROSC</i>             | -2.2896528 | -1.1951288 | 2.2896528 | down | chr8:37620124-37637283 (+) // 88.59 // p11.23    |
| 224706_at    | <i>KIAA2013</i>          | -2.2893186 | -1.1949182 | 2.2893186 | down | chr1:11979647-11986453 (-) // 95.34 // p36.22    |
| 210417_s_at  | <i>PI4KB</i>             | -2.2892118 | -1.1948509 | 2.2892118 | down | chr1:151264954-151298735 (-) // 99.71 // q21.3   |
| 226125_at    | <i>LOC100288152</i>      | -2.2890759 | -1.1947652 | 2.2890759 | down | chr5:478317-481003 (+) // 97.62 // p15.33        |
| 218240_at    | <i>NKIRAS2</i>           | -2.2888443 | -1.1946193 | 2.2888443 | down | chr17:40172433-40177654 (+) // 73.01 // q21.2    |
| 244546_at    | <i>CYCS</i>              | -2.2884917 | -1.1943971 | 2.2884917 | down | chr7:25159210-25159646 (-) // 66.97 // p15.3     |
| 214171_s_at  | <i>U2AF2</i>             | -2.2877886 | -1.1939538 | 2.2877886 | down | chr19:56166396-56172509 (-) // 97.5 // q13.42    |
| 216031_x_at  | <i>HN1L</i>              | -2.287777  | -1.1939464 | 2.287777  | down | chr16:1728304-1747862 (+) // 77.78 // p13.3      |
| 202572_s_at  | <i>DLGAP4</i>            | -2.2873173 | -1.1936566 | 2.2873173 | down | chr20:34995443-35157036 (+) // 94.93 // q11.23   |
| 213234_at    | <i>KIAA1467</i>          | -2.28647   | -1.1931219 | 2.28647   | down | chr12:13214546-13236383 (+) // 91.67 // p13.1    |
| 227286_at    | <i>INO80E</i>            | -2.2861006 | -1.192889  | 2.2861006 | down | chr16:30016390-30017111 (+) // 95.99 // p11.2    |
| 225124_at    | <i>PPP1R9B</i>           | -2.2849886 | -1.192187  | 2.2849886 | down | chr17:48211100-48226686 (-) // 95.35 // q21.33   |
| 216250_s_at  | <i>LPXN</i>              | -2.2849627 | -1.1921706 | 2.2849627 | down | chr18:21464734-21511519 (-) // 64.39 // q11.2    |
| 228675_at    | <i>USP30-AS1</i>         | -2.2847917 | -1.1920626 | 2.2847917 | down | chr12:109490379-109491770 (-) // 74.44 // q24.11 |
| 200789_at    | <i>ECH1</i>              | -2.284143  | -1.191653  | 2.284143  | down | chr19:39306069-39322438 (-) // 98.91 // q13.2    |
| 221979_at    | <i>TOPORS-AS1</i>        | -2.2838407 | -1.191462  | 2.2838407 | down | chr9:32551149-32553005 (+) // 92.2 // p21.1      |
| 204766_s_at  | <i>NUDT1</i>             | -2.283732  | -1.1913934 | 2.283732  | down | chr7:2284194-2290780 (+) // 97.82 // p22.3       |
| 222335_at    |                          | -2.2836192 | -1.1913221 | 2.2836192 | down | chr8:56740463-56740945 (+) // 53.37 // q12.1     |
| 218597_s_at  | <i>CISD1</i>             | -2.283146  | -1.1910231 | 2.283146  | down | chr10:60028924-60047592 (+) // 97.17 // q21.1    |
| 213789_at    | <i>EBP</i>               | -2.2830863 | -1.1909854 | 2.2830863 | down | chrX:48382099-48386829 (-) // 94.18 // p11.23    |
| 224163_s_at  | <i>DMAP1</i>             | -2.2830522 | -1.1909639 | 2.2830522 | down | chr1:44679126-44686344 (+) // 98.33 // p34.1     |

|             |                        |            |            |           |      |                                                  |
|-------------|------------------------|------------|------------|-----------|------|--------------------------------------------------|
| 212836_at   | <i>POLD3</i>           | -2.2827663 | -1.1907833 | 2.2827663 | down | chr11:74303628-74353771 (+) // 96.82 // q13.4    |
| 238155_at   |                        | -2.2821453 | -1.1903906 | 2.2821453 | down | chr8:57135166-57135732 (+) // 43.75 // q12.1     |
| 223347_at   | <i>MUM1</i>            | -2.2804065 | -1.189291  | 2.2804065 | down | chr19:1362328-1378427 (+) // 94.17 // p13.3      |
| 226736_at   | <i>CHURC1</i>          | -2.2802525 | -1.1891936 | 2.2802525 | down | chr14:65400925-65402086 (+) // 53.84 // q23.3    |
| 208699_x_at | <i>TKT</i>             | -2.2802    | -1.1891603 | 2.2802    | down | chr3:53259663-53290047 (-) // 94.2 // p21.1      |
| 220789_s_at | <i>SNORA5B///TBRG4</i> | -2.2793128 | -1.188599  | 2.2793128 | down | chr7:45139699-45145262 (-) // 98.5 // p13        |
| 209832_s_at | <i>CDT1</i>            | -2.279197  | -1.1885257 | 2.279197  | down | chr16:88870223-88874917 (+) // 95.01 // q24.3    |
| 223179_at   | <i>YPEL3</i>           | -2.2788775 | -1.1883234 | 2.2788775 | down | chr16:30103635-30106757 (-) // 87.83 // p11.2    |
| 229284_at   | <i>MAT2B</i>           | -2.2776134 | -1.1875229 | 2.2776134 | down | chr5:162939005-162945971 (-) // 92.43 // q34     |
| 202998_s_at | <i>LOXL2</i>           | -2.2773433 | -1.1873517 | 2.2773433 | down | chr8:23154695-23261630 (-) // 99.8 // p21.3      |
| 219483_s_at | <i>PORCN</i>           | -2.2766862 | -1.1869354 | 2.2766862 | down | chrX:48368205-48379202 (+) // 98.49 // p11.23    |
| 243948_at   |                        | -2.2766151 | -1.1868905 | 2.2766151 | down | chr14:89081293-89081798 (+) // 99.8 // q31.3     |
| 235005_at   | <i>DIS3L</i>           | -2.2762597 | -1.1866652 | 2.2762597 | down | chr15:66612974-66626066 (+) // 87.34 // q22.31   |
| 225382_at   | <i>ZNF275</i>          | -2.2756763 | -1.1862953 | 2.2756763 | down | chrX:152599624-152618383 (+) // 74.96 // q28     |
| 209044_x_at | <i>SF3B4</i>           | -2.271996  | -1.1839603 | 2.271996  | down | chr1:149895210-149899659 (-) // 98.62 // q21.2   |
| 212005_at   | <i>SZRD1</i>           | -2.2717469 | -1.1838021 | 2.2717469 | down | chr1:16693725-16724640 (+) // 96.94 // p36.13    |
| 213803_at   | <i>KPNB1</i>           | -2.2712686 | -1.1834984 | 2.2712686 | down | chr17:45761130-45761714 (+) // 97.5 // q21.32    |
| 230411_at   | <i>UBE2V2</i>          | -2.270929  | -1.1832826 | 2.270929  | down | chr8:48975306-48976099 (+) // 97.14 // q11.21    |
| 200793_s_at | <i>ACO2</i>            | -2.2708404 | -1.1832263 | 2.2708404 | down | chr22:41865130-41924713 (+) // 99.51 // q13.2    |
| 201875_s_at | <i>MPZL1</i>           | -2.2700713 | -1.1827376 | 2.2700713 | down | chr1:167759429-167760058 (+) // 95.15 // q24.2   |
| 203032_s_at | <i>FH</i>              | -2.268319  | -1.1816235 | 2.268319  | down | chr1:241660908-241683054 (-) // 88.03 // q43     |
| 217899_at   | <i>TMEM214</i>         | -2.2675428 | -1.1811298 | 2.2675428 | down | chr2:27259407-27264555 (+) // 98.71 // p23.3     |
| 211065_x_at | <i>PFKL</i>            | -2.2669418 | -1.1807473 | 2.2669418 | down | chr21:45719970-45747253 (+) // 98.82 // q22.3    |
| 238794_at   | <i>SFR1</i>            | -2.2666943 | -1.1805898 | 2.2666943 | down | chr10:105881815-105885649 (+) // 84.78 // q25.1  |
| 215537_x_at | <i>DDAH2</i>           | -2.2663152 | -1.1803485 | 2.2663152 | down | chr6:31694816-31697561 (-) // 98.53 // p21.33    |
| 216105_x_at | <i>PPP2R4</i>          | -2.2661836 | -1.1802647 | 2.2661836 | down | chr9:131873670-131911224 (+) // 95.62 // q34.11  |
| 1555943_at  | <i>PGAM5</i>           | -2.2660897 | -1.180205  | 2.2660897 | down | chr12:133287667-133298066 (+) // 73.39 // q24.33 |
| 203326_x_at |                        | -2.2658048 | -1.1800236 | 2.2658048 | down | chr9:137533804-137734739 (+) // 87.39 // q34.3   |

|              |                  |            |            |           |      |                                                  |
|--------------|------------------|------------|------------|-----------|------|--------------------------------------------------|
| 228552_s_at  | <i>ISYNA1</i>    | -2.2651935 | -1.1796342 | 2.2651935 | down | chr19:18544585-18545378 (-) // 100.0 // p13.11   |
| 227446_s_at  | <i>DHRS4-AS1</i> | -2.2651591 | -1.1796124 | 2.2651591 | down | chr14:24407995-24409196 (-) // 12.43 // q11.2    |
| 226173_at    | <i>TBC1D25</i>   | -2.265139  | -1.1795996 | 2.265139  | down | chrX:48398158-48419697 (+) // 99.48 // p11.23    |
| 1570202_a_at | <i>MKL2</i>      | -2.264834  | -1.1794052 | 2.264834  | down | chr16:14173144-14339450 (+) // 94.01 // p13.12   |
| 209556_at    | <i>NCDN</i>      | -2.2641242 | -1.178953  | 2.2641242 | down | chr1:36023408-36032380 (+) // 96.57 // p34.3     |
| 204191_at    | <i>IFNAR1</i>    | -2.263703  | -1.1786848 | 2.263703  | down | chr21:34697282-34728856 (+) // 89.44 // q22.11   |
| 205159_at    | <i>CSF2RB</i>    | -2.2633803 | -1.1784791 | 2.2633803 | down | chr22:37318075-37336481 (+) // 88.72 // q12.3    |
| 232387_at    | <i>SYNRG</i>     | -2.2625966 | -1.1779794 | 2.2625966 | down | chr17:35877932-35913910 (-) // 98.98 // q12      |
| 205166_at    | <i>CAPN5</i>     | -2.2624707 | -1.1778991 | 2.2624707 | down | chr11:76778053-76835245 (+) // 95.32 // q13.5    |
| 1554152_a_at | <i>OGDH</i>      | -2.26233   | -1.1778095 | 2.26233   | down | chr7:44646193-44716194 (+) // 80.2 // p13        |
| 208112_x_at  | <i>EHD1</i>      | -2.261781  | -1.1774592 | 2.261781  | down | chr11:64620207-64646181 (-) // 88.23 // q13.1    |
| 1861_at      | <i>BAD</i>       | -2.2607403 | -1.1767952 | 2.2607403 | down | chr11:64037301-64051883 (-) // 97.38 // q13.1    |
| 202253_s_at  | <i>DNM2</i>      | -2.2601264 | -1.1764034 | 2.2601264 | down | chr19:10828773-10942579 (+) // 98.92 // p13.2    |
| 216026_s_at  | <i>POLE</i>      | -2.2595315 | -1.1760236 | 2.2595315 | down | chr12:133200347-133202905 (-) // 94.17 // q24.33 |
| 242217_s_at  | <i>FBRS</i>      | -2.2593508 | -1.1759083 | 2.2593508 | down | chr16:30681024-30681512 (+) // 98.59 // p11.2    |
| 1552980_at   | <i>HAS3</i>      | -2.2580764 | -1.1750944 | 2.2580764 | down | chr16:69143297-69152617 (+) // 89.42 // q22.1    |
| 229165_at    | <i>MRPL12</i>    | -2.256847  | -1.1743085 | 2.256847  | down | chr17:79670540-79674548 (-) // 99.31 // q25.3    |
| 217629_at    |                  | -2.25639   | -1.1740165 | 2.25639   | down |                                                  |
| 224988_at    | <i>C6orf89</i>   | -2.2560503 | -1.1737993 | 2.2560503 | down | chr6:36867201-36894325 (+) // 90.68 // p21.2     |
| 209419_at    | <i>THOC5</i>     | -2.2549067 | -1.1730677 | 2.2549067 | down | chr22:29901867-29949703 (-) // 64.67 // q12.2    |
| 1554383_a_at | <i>TRAM2</i>     | -2.2542634 | -1.172656  | 2.2542634 | down | chr6:52367770-52441862 (-) // 85.3 // p12.2      |
| 202307_s_at  | <i>TAP1</i>      | -2.2537591 | -1.1723334 | 2.2537591 | down | chr6:32812986-32821623 (-) // 99.96 // p21.32    |
| 207057_at    | <i>SLC16A7</i>   | -2.2535126 | -1.1721755 | 2.2535126 | down | chr12:60083154-60173983 (+) // 99.14 // q14.1    |
| 230899_at    | <i>SETD4</i>     | -2.253145  | -1.1719402 | 2.253145  | down | chr21:37418169-37431222 (+) // 99.79 // q22.12   |
| 1552256_a_at | <i>SCARB1</i>    | -2.2514846 | -1.1708766 | 2.2514846 | down | chr12:125261826-125348519 (-) // 93.26 // q24.31 |
| 213985_s_at  | <i>TMEM259</i>   | -2.250865  | -1.1704795 | 2.250865  | down | chr19:1011172-1014303 (+) // 97.44 // p13.3      |
| 213937_s_at  | <i>FTSJ1</i>     | -2.2507746 | -1.1704216 | 2.2507746 | down | chrX:48334623-48341339 (+) // 98.12 // p11.23    |
| 223847_s_at  | <i>ERGIC1</i>    | -2.2507374 | -1.1703978 | 2.2507374 | down | chr5:172323827-172379686 (+) // 97.02 // q35.1   |

|              |                                  |                  |            |           |      |                                                  |
|--------------|----------------------------------|------------------|------------|-----------|------|--------------------------------------------------|
| 233573_s_at  | <i>WDR6</i>                      | -2.2497656       | -1.1697748 | 2.2497656 | down | chr3:49044825-49053385 (+) // 99.87 // p21.31    |
| 212613_at    | <i>BTN3A2</i>                    | -2.2494602       | -1.1695788 | 2.2494602 | down | chr6:26376387-26378540 (+) // 75.51 // p22.2     |
| 212003_at    | <i>SZRD1</i>                     | -2.2490675       | -1.169327  | 2.2490675 | down | chr1:16693725-16724640 (+) // 96.94 // p36.13    |
| 201755_at    | <i>MCM5</i>                      | -2.2489724       | -1.169266  | 2.2489724 | down | chr22:35796127-35820494 (+) // 99.76 // q12.3    |
| 213674_x_at  | <i>IGHD</i>                      | -2.2486815       | -1.1690793 | 2.2486815 | down | chr14:106304651-106610840 (-) // 92.03 // q32.33 |
| 208940_at    | <i>SEPHS1</i>                    | -2.2485955       | -1.1690241 | 2.2485955 | down | chr10:13359431-13390047 (-) // 96.29 // p13      |
| 65585_at     | <i>FAM86B1</i> /// <i>FAM86B</i> | -2.2483463       | -1.1688643 | 2.2483463 | down | chr8:12039618-12040268 (-) // 76.18 // p23.1     |
| 227787_s_at  | <i>MED30</i>                     | -2.2480967       | -1.1687042 | 2.2480967 | down | chr8:118532951-118552501 (+) // 98.11 // q24.11  |
| 238836_at    |                                  | -2.2478843       | -1.1685678 | 2.2478843 | down | chr10:60159565-60160136 (+) // 79.33 // q21.1    |
| 216705_s_at  | <i>ADA</i>                       | -2.2477996       | -1.1685134 | 2.2477996 | down | chr20:43248474-43280343 (-) // 99.71 // q13.12   |
| 207788_s_at  | <i>SORBS3</i>                    | -2.2469318       | -1.1679564 | 2.2469318 | down | chr8:22423190-22432263 (+) // 96.41 // p21.3     |
| 201855_s_at  | <i>ATMIN</i>                     | -2.2459695       | -1.1673384 | 2.2459695 | down | chr16:81074129-81080951 (+) // 93.63 // q23.2    |
| 204175_at    | <i>ZNF593</i>                    | -2.2459016       | -1.1672947 | 2.2459016 | down | chr1:26496478-26497361 (+) // 99.64 // p36.11    |
| 207620_s_at  | <i>CASK</i>                      | -2.2447414       | -1.1665493 | 2.2447414 | down | chrX:41379342-41782268 (-) // 99.87 // p11.4     |
| 1553015_a_at | <i>RECQL4</i>                    | -2.244502        | -1.1663954 | 2.244502  | down | chr8:145736813-145743168 (-) // 99.92 // q24.3   |
| 210983_s_at  | <i>MCM7</i>                      | -2.2444217       | -1.1663438 | 2.2444217 | down | chr7:99690918-99697360 (-) // 96.03 // q22.1     |
| 235390_at    | <i>SREK1IP1</i>                  | -2.2443697       | -1.1663103 | 2.2443697 | down | chr5:64017282-64018648 (-) // 81.48 // q12.3     |
| 226314_at    | <i>CHST14</i>                    | -2.2440376       | -1.1660968 | 2.2440376 | down | chr15:40763475-40765357 (+) // 98.17 // q15.1    |
| 215668_s_at  | <i>PLXNB1</i>                    | -2.2440188       | -1.1660848 | 2.2440188 | down | chr3:48455167-48466020 (-) // 99.95 // p21.31    |
| 214975_s_at  | <i>MTMR1</i>                     | -2.2439206       | -1.1660216 | 2.2439206 | down | chrX:149895692-149933397 (+) // 88.92 // q28     |
| 221096_s_at  | <i>TMCO6</i>                     | -2.2438333       | -1.1659656 | 2.2438333 | down | chr5:140022034-140024989 (+) // 63.32 // q31.3   |
| 202592_at    | <i>BLOC1S1</i>                   | -2.2432425       | -1.1655856 | 2.2432425 | down | chr12:56109820-56113484 (+) // 99.65 // q13.2    |
| 224472_x_at  | <i>SDF4</i>                      | -2.2423043       | -1.1649821 | 2.2423043 | down | chr1:1152311-1167330 (-) // 96.96 // p36.33      |
| 208363_s_at  | <i>INPP4A</i>                    | -2.2421057       | -1.1648543 | 2.2421057 | down | chr2:99061412-99198284 (+) // 98.98 // q11.2     |
| 217729_s_at  | <i>AES</i>                       | -2.2419057       | -1.1647255 | 2.2419057 | down | chr19:3053159-3062274 (-) // 94.71 // p13.3      |
| 222519_s_at  | <i>IFT57</i>                     | -2.2417953       | -1.1646545 | 2.2417953 | down | chr3:107879659-107941271 (-) // 93.13 // q13.12  |
| 1552276_a_at | <i>VPS18</i>                     | -2.2414155       | -1.1644101 | 2.2414155 | down | chr15:41186652-41196172 (+) // 97.35 // q15.1    |
| 226454_at    |                                  | 9.Mar -2.2414021 | -1.1644015 | 2.2414021 | down | chr12:58150725-58153259 (+) // 85.93 // q14.1    |

|              |                         |            |            |           |      |                                                  |
|--------------|-------------------------|------------|------------|-----------|------|--------------------------------------------------|
| 219173_at    | <i>MYO15B</i>           | -2.240503  | -1.1638227 | 2.240503  | down | chr17:73617184-73622925 (+) // 97.88 // q25.1    |
| 224658_x_at  | <i>PACS1</i>            | -2.240063  | -1.1635393 | 2.240063  | down | chr11:65837879-66012214 (+) // 94.89 // q13.1    |
| 209040_s_at  | <i>PSMB8</i>            | -2.2394054 | -1.1631157 | 2.2394054 | down | chr6:32808624-32811801 (-) // 98.97 // p21.32    |
| 229827_at    | <i>BUB3</i>             | -2.2391655 | -1.1629612 | 2.2391655 | down | chr10:124913963-124922203 (-) // 93.83 // q26.13 |
| 224703_at    | <i>DCAF5</i>            | -2.2388334 | -1.1627473 | 2.2388334 | down | chr14:69518527-69619716 (-) // 98.81 // q24.1    |
| 214907_at    | <i>CEACAM21</i>         | -2.2384384 | -1.1624926 | 2.2384384 | down | chr19:42071032-42093194 (+) // 60.46 // q13.2    |
| 218054_s_at  | <i>KXD1</i>             | -2.238377  | -1.162453  | 2.238377  | down | chr19:18668603-18680191 (-) // 96.74 // p13.11   |
| 201771_at    | <i>SCAMP3</i>           | -2.2382336 | -1.1623607 | 2.2382336 | down | chr1:155225770-155232038 (-) // 99.72 // q22     |
| 219953_s_at  | <i>AKIP1</i>            | -2.2382333 | -1.1623604 | 2.2382333 | down | chr11:8932686-8941100 (+) // 99.75 // p15.4      |
| 225106_s_at  | <i>OGFOD1</i>           | -2.2378037 | -1.1620835 | 2.2378037 | down | chr16:56485433-56513034 (+) // 78.12 // q12.2    |
| 1563273_at   |                         | -2.237518  | -1.1618993 | 2.237518  | down | chr2:220233426-220233999 (-) // 11.76 // q35     |
| 235040_at    | <i>RUNDC1</i>           | -2.2375033 | -1.1618898 | 2.2375033 | down | chr17:41132588-41144200 (+) // 83.94 // q21.31   |
| 227037_at    | <i>PLD6</i>             | -2.2374387 | -1.1618481 | 2.2374387 | down | chr17:17104308-17105662 (-) // 73.54 // p11.2    |
| 1552978_a_at | <i>SCAMP1</i>           | -2.2359204 | -1.1608689 | 2.2359204 | down | chr5:77656405-77771818 (+) // 96.94 // q14.1     |
| 222557_at    | <i>STMN3</i>            | -2.2350929 | -1.1603348 | 2.2350929 | down | chr20:62271062-62284801 (-) // 94.18 // q13.33   |
| 221534_at    | <i>C11orf68</i>         | -2.2348921 | -1.1602051 | 2.2348921 | down | chr11:65684301-65686440 (-) // 95.06 // q13.1    |
| 1555808_a_at | <i>EXD2</i>             | -2.2343757 | -1.1598718 | 2.2343757 | down | chr14:69676345-69708164 (+) // 87.9 // q24.1     |
| 210589_s_at  | <i>GBAP1</i>            | -2.2336087 | -1.1593765 | 2.2336087 | down | chr1:155183616-155188264 (-) // 99.67 // q22     |
| 226767_s_at  | <i>FAHD1</i>            | -2.2333245 | -1.1591929 | 2.2333245 | down | chr16:1876971-1878275 (+) // 78.13 // p13.3      |
| 222155_s_at  | <i>SLC52A2</i>          | -2.2331698 | -1.159093  | 2.2331698 | down | chr8:145582224-145584930 (+) // 99.51 // q24.3   |
| 204545_at    | <i>PEX6</i>             | -2.2330647 | -1.1590251 | 2.2330647 | down | chr6:42931874-42946958 (-) // 98.59 // p21.1     |
| 224708_at    | <i>KIAA2013</i>         | -2.2327213 | -1.1588032 | 2.2327213 | down | chr1:11979647-11986453 (-) // 95.34 // p36.22    |
| 217222_at    | <i>IGHG1</i>            | -2.2324545 | -1.1586307 | 2.2324545 | down | chr14:106478108-106478402 (+) // 70.12 // q32.33 |
| 225596_at    | <i>KLC4</i>             | -2.2323272 | -1.1585486 | 2.2323272 | down | chr6:43029046-43042831 (+) // 91.69 // p21.1     |
| 225948_at    | <i>APOPT1///KLC1</i>    | -2.2318647 | -1.1582496 | 2.2318647 | down | chr14:104029315-104056864 (+) // 85.32 // q32.33 |
|              |                         |            |            |           |      | chr17:60501261-60526705 (+) // 90.44 //          |
|              |                         |            |            |           |      | q23.2///chr7:128116817-128142585 (+) // 92.91 // |
|              |                         |            |            |           |      | q32.1                                            |
| 221079_s_at  | <i>METTL2A///METTL2</i> | -2.2318316 | -1.1582282 | 2.2318316 | down |                                                  |
| 201391_at    | <i>TRAP1</i>            | -2.2308874 | -1.1576177 | 2.2308874 | down | chr16:3708038-3767513 (-) // 99.28 // p13.3      |



|              |                 |            |            |           |      |                                                                                                                                                |
|--------------|-----------------|------------|------------|-----------|------|------------------------------------------------------------------------------------------------------------------------------------------------|
| 203054_s_at  | <i>TCTA</i>     | -2.2299912 | -1.157038  | 2.2299912 | down | chr3:49449638-49453908 (+) // 86.44 // p21.31                                                                                                  |
| 209584_x_at  | <i>APOBEC3C</i> | -2.2293458 | -1.1566204 | 2.2293458 | down | chr22:39410261-39414823 (+) // 87.67 // q13.1                                                                                                  |
| 222418_s_at  | <i>TMEM43</i>   | -2.2293262 | -1.1566077 | 2.2293262 | down | chr3:14166522-14185179 (+) // 98.73 // p25.1<br>chr19:18280885-18281345 (-) // 66.23 // p13.11///chr5:122561762-122562217 (-) // 64.5 // q23.2 |
| 229392_s_at  | <i>PIK3R2</i>   | -2.2292786 | -1.1565769 | 2.2292786 | down | chr17:36921944-36956158 (-) // 94.67 // q12                                                                                                    |
| 201080_at    | <i>PIP4K2B</i>  | -2.228328  | -1.1559616 | 2.228328  | down | chr4:79832340-79834122 (+) // 90.3 // q21.21                                                                                                   |
| 37170_at     | <i>BMP2K</i>    | -2.2280877 | -1.1558061 | 2.2280877 | down | chr1:46027458-46035722 (+) // 95.32 // p34.1                                                                                                   |
| 201900_s_at  | <i>AKR1A1</i>   | -2.227909  | -1.1556903 | 2.227909  | down | chr6:96025418-96035256 (+) // 81.56 // q16.1                                                                                                   |
| 1554193_s_at | <i>MANEA</i>    | -2.227612  | -1.155498  | 2.227612  | down | chrX:153706121-153707251 (-) // 98.16 // q28                                                                                                   |
| 219061_s_at  | <i>LAGE3</i>    | -2.2272851 | -1.1552863 | 2.2272851 | down | chr19:6730065-6737572 (-) // 96.99 // p13.3                                                                                                    |
| 225058_at    | <i>GPR108</i>   | -2.2258646 | -1.1543659 | 2.2258646 | down | chr19:17622464-17632095 (+) // 98.91 // p13.11                                                                                                 |
| 218388_at    | <i>PGLS</i>     | -2.2251003 | -1.1538703 | 2.2251003 | down | chr13:50018819-50020072 (+) // 46.27 // q14.2                                                                                                  |
| 1564972_x_at | <i>SETDB2</i>   | -2.2249947 | -1.1538018 | 2.2249947 | down | chr2:20646834-20648541 (+) // 89.46 // p24.1                                                                                                   |
| 1553962_s_at | <i>RHOB</i>     | -2.2249022 | -1.1537418 | 2.2249022 | down | chr6:139349896-139364439 (+) // 87.56 // q24.1                                                                                                 |
| 223361_at    | <i>ABRACL</i>   | -2.2244823 | -1.1534696 | 2.2244823 | down | chr11:61560149-61564222 (+) // 99.94 // q12.2                                                                                                  |
| 204768_s_at  | <i>FEN1</i>     | -2.22401   | -1.1531632 | 2.22401   | down | chr22:30687979-30722914 (-) // 97.67 // q12.2                                                                                                  |
| 226133_s_at  | <i>TBC1D10A</i> | -2.22316   | -1.1526117 | 2.22316   | down | chr8:144694789-144698896 (-) // 96.57 // q24.3                                                                                                 |
| 201644_at    | <i>TSTA3</i>    | -2.2228677 | -1.1524221 | 2.2228677 | down | chr17:75447682-75448256 (-) // 96.12 // q25.3                                                                                                  |
| 239030_at    |                 | -2.222372  | -1.1521003 | 2.222372  | down | chr7:148700542-148725735 (-) // 87.46 // q36.1                                                                                                 |
| 211048_s_at  | <i>PDIA4</i>    | -2.222071  | -1.151905  | 2.222071  | down | chr1:154917428-154928580 (-) // 99.15 // q21.3                                                                                                 |
| 207838_x_at  | <i>PBXIP1</i>   | -2.2219925 | -1.1518539 | 2.2219925 | down | chr19:55085307-55098862 (+) // 99.86 // q13.42                                                                                                 |
| 211101_x_at  | <i>LILRA2</i>   | -2.2215137 | -1.1515431 | 2.2215137 | down | chr11:63753884-63765884 (+) // 94.41 // q13.1                                                                                                  |
| 201245_s_at  | <i>OTUB1</i>    | -2.2210839 | -1.1512638 | 2.2210839 | down | chr17:73452735-73496163 (+) // 99.98 // q25.1                                                                                                  |
| 202650_s_at  | <i>KIAA0195</i> | -2.2208652 | -1.1511219 | 2.2208652 | down | chr19:46506263-46521873 (+) // 94.0 // q13.32                                                                                                  |
| 228472_at    | <i>CCDC61</i>   | -2.220733  | -1.1510359 | 2.220733  | down | chr1:228294387-228296954 (+) // 81.51 // q42.13                                                                                                |
| 227024_s_at  | <i>MRPL55</i>   | -2.2204509 | -1.1508527 | 2.2204509 | down | chr11:57174426-57194557 (-) // 83.72 // q12.1                                                                                                  |
| 213113_s_at  | <i>SLC43A3</i>  | -2.219427  | -1.1501874 | 2.219427  | down | chr22:21922007-21978323 (+) // 95.93 // q11.21                                                                                                 |
| 200684_s_at  | <i>UBE2L3</i>   | -2.219158  | -1.1500124 | 2.219158  | down |                                                                                                                                                |

|              |                           |            |            |           |      |                                                  |
|--------------|---------------------------|------------|------------|-----------|------|--------------------------------------------------|
| 1555754_s_at | <i>ATN1</i>               | -2.2191482 | -1.1500059 | 2.2191482 | down | chr12:7045756-7046102 (+) // 74.93 // p13.31     |
| 213617_s_at  | <i>TPGS2</i>              | -2.2185583 | -1.1496224 | 2.2185583 | down | chr18:34366471-34408708 (-) // 67.26 // q12.2    |
| 205267_at    | <i>POU2AF1</i>            | -2.2183478 | -1.1494856 | 2.2183478 | down | chr11:111222982-111250417 (-) // 79.57 // q23.1  |
| 214668_at    | <i>SPRYD7</i>             | -2.2182105 | -1.1493963 | 2.2182105 | down | chr13:50341327-50510608 (-) // 88.56 // q14.2    |
| 216591_s_at  | <i>SDHC</i>               | -2.218021  | -1.1492729 | 2.218021  | down | chr11:17457218-17457728 (-) // 99.8 // p15.1     |
| 238915_at    | <i>LOC100129361</i>       | -2.216981  | -1.1485963 | 2.216981  | down | chr12:11326284-11327183 (+) // 68.37 // p13.2    |
| 202024_at    | <i>ASNA1</i>              | -2.216966  | -1.1485866 | 2.216966  | down | chr19:12848368-12859136 (+) // 99.75 // p13.2    |
| 1557953_at   | <i>ZKSCAN1</i>            | -2.2168791 | -1.1485301 | 2.2168791 | down | chr7:99634366-99636664 (+) // 65.18 // q22.1     |
| 215519_x_at  | <i>SGSM3</i>              | -2.216012  | -1.1479657 | 2.216012  | down | chr22:40802563-40806108 (+) // 99.87 // q13.1    |
| 215942_s_at  | <i>GTSE1</i>              | -2.2158146 | -1.1478372 | 2.2158146 | down | chr22:46721734-46726352 (+) // 78.42 // q13.31   |
| 240212_at    | <i>OTTHUMG000001608i</i>  | -2.2157242 | -1.1477783 | 2.2157242 | down | chr4:174088894-174089318 (-) // 98.15 // q34.1   |
| 213135_at    | <i>TIAM1</i>              | -2.2146702 | -1.1470919 | 2.2146702 | down | chr21:32490735-32492552 (-) // 96.71 // q22.11   |
| 50400_at     | <i>PAOX</i>               | -2.2137256 | -1.1464764 | 2.2137256 | down | chr10:135197463-135205197 (+) // 90.16 // q26.3  |
| 203061_s_at  | <i>MDC1</i>               | -2.2130527 | -1.1460378 | 2.2130527 | down | chr6:30667588-30682957 (-) // 97.16 // p21.33    |
| 242474_s_at  | <i>VMA21</i>              | -2.212868  | -1.1459174 | 2.212868  | down | chrX:150565735-150574201 (+) // 98.74 // q28     |
| 235539_at    | <i>NUMA1</i>              | -2.2128298 | -1.1458925 | 2.2128298 | down | chr11:71716791-71719246 (+) // 46.25 // q13.4    |
| 201516_at    | <i>SRM</i>                | -2.2124255 | -1.1456289 | 2.2124255 | down | chr1:11114676-11120081 (-) // 91.2 // p36.22     |
| 217598_at    | <i>CINP</i>               | -2.2120962 | -1.1454141 | 2.2120962 | down | chr14:102813489-102813958 (-) // 36.33 // q32.31 |
| 204082_at    | <i>PBX3</i>               | -2.2120466 | -1.1453818 | 2.2120466 | down | chr9:128509732-128729368 (+) // 99.96 // q33.3   |
| 1559746_a_at | <i>ZNF718</i>             | -2.2114828 | -1.145014  | 2.2114828 | down | chr4:124385-156177 (+) // 77.55 // p16.3         |
| 216689_x_at  | <i>ARHGAP1</i>            | -2.2111378 | -1.144789  | 2.2111378 | down | chr11:46700276-46703066 (-) // 94.85 // p11.2    |
| 219325_s_at  | <i>ELAC1</i>              | -2.2111378 | -1.144789  | 2.2111378 | down | chr18:48494446-48514489 (+) // 90.69 // q21.2    |
| 204610_s_at  | <i>CCDC85B</i>            | -2.2111273 | -1.1447821 | 2.2111273 | down | chr11:65658226-65659105 (+) // 95.45 // q13.1    |
| 201571_s_at  | <i>DCTD</i>               | -2.2110865 | -1.1447555 | 2.2110865 | down | chr4:183811256-183838463 (-) // 86.79 // q35.1   |
| 228682_at    |                           | -2.2107892 | -1.1445615 | 2.2107892 | down | chr4:83351789-83372299 (-) // 99.79 // q21.22    |
| 209637_s_at  | <i>RGS12</i>              | -2.209283  | -1.1435783 | 2.209283  | down | chr4:3317795-3441635 (+) // 84.25 // p16.3       |
| 57715_at     | <i>CALHM2</i>             | -2.2081873 | -1.1428626 | 2.2081873 | down | chr10:105206542-105209391 (-) // 77.4 // q24.33  |
| 213215_at    | <i>AP3S2///C15orf38-A</i> | -2.2079897 | -1.1427335 | 2.2079897 | down | chr15:90373832-90375701 (-) // 65.45 // q26.1    |

|             |                            |            |            |           |      |                                                 |
|-------------|----------------------------|------------|------------|-----------|------|-------------------------------------------------|
| 33646_g_at  | <i>GM2A</i>                | -2.2076962 | -1.1425416 | 2.2076962 | down | chr5:150639359-150646885 (+) // 78.24 // q33.1  |
| 215833_s_at | <i>SPPL2B</i>              | -2.2071931 | -1.1422129 | 2.2071931 | down | chr19:2339677-2353207 (+) // 99.78 // p13.3     |
| 205462_s_at | <i>HPCAL1</i>              | -2.207074  | -1.1421349 | 2.207074  | down | chr2:10536960-10567191 (+) // 93.8 // p25.1     |
| 225286_at   | <i>ARSD</i>                | -2.206579  | -1.1418114 | 2.206579  | down | chrX:2822016-2823414 (-) // 81.45 // p22.33     |
| 230575_at   | <i>MSRB2</i>               | -2.2063553 | -1.1416651 | 2.2063553 | down | chr10:23410468-23410941 (+) // 96.33 // p12.2   |
| 224510_s_at | <i>CLPB</i>                | -2.2063508 | -1.1416622 | 2.2063508 | down | chr11:72003471-72145568 (-) // 99.14 // q13.4   |
| 221646_s_at | <i>LOC100996904///ZD1</i>  | -2.2057483 | -1.1412683 | 2.2057483 | down | chr5:795721-801260 (-) // 95.98 // p15.33       |
| 214530_x_at | <i>EPB41</i>               | -2.2054114 | -1.1410478 | 2.2054114 | down | chr1:29241088-29443363 (+) // 91.51 // p35.3    |
| 209665_at   | <i>CYB561D2</i>            | -2.2034261 | -1.1397486 | 2.2034261 | down | chr3:50388303-50391485 (+) // 99.91 // p21.31   |
| 219123_at   | <i>ZNF232</i>              | -2.2032511 | -1.139634  | 2.2032511 | down | chr17:5009032-5015161 (-) // 100.0 // p13.2     |
| 206473_at   | <i>MBTPS2</i>              | -2.2029564 | -1.139441  | 2.2029564 | down | chrX:21857753-21900873 (+) // 95.28 // p22.12   |
| 222809_x_at | <i>CCDC85C</i>             | -2.2024755 | -1.139126  | 2.2024755 | down | chr14:99977529-99981417 (-) // 92.39 // q32.2   |
| 231772_x_at | <i>CENPH</i>               | -2.2023613 | -1.1390512 | 2.2023613 | down | chr5:68485374-68506148 (+) // 77.45 // q13.2    |
| 203937_s_at | <i>TAF1C</i>               | -2.201936  | -1.1387726 | 2.201936  | down | chr16:84211460-84220652 (-) // 99.34 // q24.1   |
| 216863_s_at | <i>MORC2</i>               | -2.2014425 | -1.1384491 | 2.2014425 | down | chr22:31322789-31354679 (-) // 100.0 // q12.2   |
| 227877_at   | <i>ANXA2R</i>              | -2.2013764 | -1.1384058 | 2.2013764 | down | chr5:43039334-43040127 (-) // 94.03 // p12      |
| 214509_at   | <i>HIST1H3A///HIST1H3A</i> | -2.2008245 | -1.1380441 | 2.2008245 | down | chr6:27839623-27840099 (-) // 100.0 // p22.1    |
| 203114_at   | <i>SSSCA1</i>              | -2.2006426 | -1.1379249 | 2.2006426 | down | chr11:65337942-65339238 (+) // 98.64 // q13.1   |
| 204411_at   | <i>KIF21B</i>              | -2.2005403 | -1.1378578 | 2.2005403 | down | chr1:200938519-200942179 (-) // 98.72 // q32.1  |
| 221745_at   | <i>DCAF7</i>               | -2.2005057 | -1.1378351 | 2.2005057 | down | chr17:61666794-61669907 (+) // 89.06 // q23.3   |
| 227858_at   | <i>PCNXL3</i>              | -2.2004147 | -1.1377754 | 2.2004147 | down | chr11:65402818-65404910 (+) // 92.49 // q13.1   |
| 218480_at   | <i>AGBL5</i>               | -2.200383  | -1.1377547 | 2.200383  | down | chr2:27276315-27282401 (+) // 98.89 // p23.3    |
| 226557_at   | <i>TTC5</i>                | -2.2000387 | -1.1375289 | 2.2000387 | down | chr14:20757112-20774097 (-) // 95.6 // q11.2    |
| 219512_at   | <i>DSN1</i>                | -2.199776  | -1.1373565 | 2.199776  | down | chr20:35380582-35402200 (-) // 65.97 // q11.23  |
| 204275_at   | <i>SOLH</i>                | -2.1990683 | -1.1368924 | 2.1990683 | down | chr16:577855-604636 (+) // 94.21 // p13.3       |
| 219907_at   | <i>FRS3</i>                | -2.19899   | -1.1368412 | 2.19899   | down | chr6:41737913-41745884 (-) // 95.47 // p21.1    |
| 226027_at   | <i>SWI5</i>                | -2.1985977 | -1.1365836 | 2.1985977 | down | chr9:131038522-131051268 (+) // 90.83 // q34.11 |
| 201580_s_at | <i>TMX4</i>                | -2.1978304 | -1.13608   | 2.1978304 | down | chr20:7957999-8000443 (-) // 86.89 // p12.3     |

|             |                         |            |            |           |      |                                                 |
|-------------|-------------------------|------------|------------|-----------|------|-------------------------------------------------|
| 218260_at   | <i>DDA1</i>             | -2.1974494 | -1.1358299 | 2.1974494 | down | chr14:45356443-45357006 (-) // 72.51 // q21.2   |
| 201389_at   | <i>ITGA5</i>            | -2.1973872 | -1.1357892 | 2.1973872 | down | chr12:54789046-54813005 (-) // 98.91 // q13.13  |
| 214794_at   | <i>PA2G4</i>            | -2.194875  | -1.1341387 | 2.194875  | down | chr3:156527073-156529817 (-) // 82.98 // q25.31 |
| 219875_s_at | <i>DESI2</i>            | -2.1945512 | -1.1339259 | 2.1945512 | down | chr1:244816557-244869558 (+) // 99.82 // q44    |
| 229370_at   | <i>LOC100996388</i>     | -2.1944122 | -1.1338346 | 2.1944122 | down | chr7:155087627-155089222 (-) // 98.57 // q36.2  |
| 238329_at   |                         | -2.194399  | -1.133826  | 2.194399  | down | chr17:16946073-17046983 (-) // 92.55 // p11.2   |
| 209760_at   | <i>KIAA0922</i>         | -2.1941457 | -1.1336592 | 2.1941457 | down | chr4:154505985-154557775 (+) // 97.57 // q31.3  |
| 223696_at   | <i>ARSD</i>             | -2.193682  | -1.1333544 | 2.193682  | down | chr1:101455618-101491309 (-) // 45.48 // p21.2  |
| 200820_at   | <i>PSMD8</i>            | -2.1927097 | -1.1327147 | 2.1927097 | down | chr19:38865450-38874114 (+) // 100.0 // q13.2   |
| 218853_s_at | <i>MOSPD1</i>           | -2.1919668 | -1.132226  | 2.1919668 | down | chrX:134021661-134049297 (-) // 97.46 // q26.3  |
| 226451_at   | <i>FDX1L</i>            | -2.1918912 | -1.1321762 | 2.1918912 | down | chr19:10420573-10426684 (-) // 75.45 // p13.2   |
| 215099_s_at | <i>RXRΒ</i>             | -2.1918159 | -1.1321266 | 2.1918159 | down | chr6:33163188-33166346 (-) // 98.31 // p21.32   |
| 231115_at   | <i>POLH</i>             | -2.1915648 | -1.1319613 | 2.1915648 | down | chr6:43587851-43588259 (+) // 93.75 // p21.1    |
| 218377_s_at | <i>RWDD2B</i>           | -2.1912663 | -1.1317649 | 2.1912663 | down | chr21:30378081-30391692 (-) // 98.67 // q21.3   |
| 213041_s_at | <i>ATP5D</i>            | -2.191205  | -1.1317245 | 2.191205  | down | chr19:1241754-1244820 (+) // 70.74 // p13.3     |
| 222267_at   | <i>TMEM209</i>          | -2.190616  | -1.1313366 | 2.190616  | down | chr7:129805491-129832544 (-) // 79.67 // q32.2  |
| 91952_at    | <i>DCAF15</i>           | -2.1904254 | -1.131211  | 2.1904254 | down | chr19:14070797-14072256 (+) // 99.28 // p13.12  |
| 204418_x_at | <i>GSTM2</i>            | -2.19017   | -1.1310428 | 2.19017   | down | chr1:110210721-110217907 (+) // 98.68 // p13.3  |
| 202494_at   | <i>PPIE</i>             | -2.1893902 | -1.130529  | 2.1893902 | down | chr1:40204561-40219375 (+) // 98.44 // p34.2    |
| 225399_at   | <i>TSEN15</i>           | -2.1891217 | -1.1303521 | 2.1891217 | down | chr1:184020796-184043342 (+) // 88.68 // q25.3  |
| 212995_x_at | <i>MZT2A//MZT2B</i>     | -2.188924  | -1.1302218 | 2.188924  | down | chr2:130939615-130948300 (+) // 89.77 // q21.1  |
| 201678_s_at | <i>C3orf37</i>          | -2.1888888 | -1.1301987 | 2.1888888 | down | chr3:128998550-129024133 (+) // 90.25 // q21.3  |
| 205039_s_at | <i>IKZF1</i>            | -2.187861  | -1.1295211 | 2.187861  | down | chr7:50344377-50470223 (+) // 93.44 // p12.2    |
| 204962_s_at | <i>CENPA//SLC35F6</i>   | -2.1873393 | -1.1291771 | 2.1873393 | down | chr2:27008920-27017454 (+) // 99.93 // p23.3    |
| 211611_s_at | <i>ATF6B//LOC101060</i> | -2.1866374 | -1.128714  | 2.1866374 | down | chr6:32065906-32095988 (-) // 99.87 // p21.33   |
| 234471_s_at | <i>NCOA5</i>            | -2.1865711 | -1.1286702 | 2.1865711 | down | chr20:44689635-44718552 (-) // 99.72 // q13.12  |
| 213701_at   | <i>C12orf29</i>         | -2.1853878 | -1.1278894 | 2.1853878 | down | chr12:88442314-88443936 (+) // 91.97 // q21.32  |
| 219485_s_at | <i>PSMD10</i>           | -2.185319  | -1.1278439 | 2.185319  | down | chrX:107327438-107334848 (-) // 100.0 // q22.3  |

|              |                          |            |            |           |      |                                                  |
|--------------|--------------------------|------------|------------|-----------|------|--------------------------------------------------|
| 235136_at    | <i>ORMDL3</i>            | -2.184737  | -1.1274595 | 2.184737  | down | chr17:38077933-38079517 (-) // 98.79 // q12      |
| 224643_at    | <i>PRRC1</i>             | -2.1847107 | -1.1274422 | 2.1847107 | down | chr5:126853344-126890774 (+) // 94.6 // q23.2    |
| 218841_at    | <i>ASB8</i>              | -2.1841657 | -1.1270823 | 2.1841657 | down | chr12:48542465-48551285 (-) // 80.99 // q13.11   |
| 219215_s_at  | <i>SLC39A4</i>           | -2.1838746 | -1.12689   | 2.1838746 | down | chr8:145637798-145641896 (-) // 98.83 // q24.3   |
| 207239_s_at  | <i>CDK16</i>             | -2.1837063 | -1.1267788 | 2.1837063 | down | chrX:47078466-47088298 (+) // 94.84 // p11.23    |
| 225570_at    | <i>SLC41A1</i>           | -2.1833975 | -1.1265748 | 2.1833975 | down | chr1:205758222-205767150 (-) // 91.34 // q32.1   |
| 221777_at    | <i>C12orf52</i>          | -2.1833231 | -1.1265256 | 2.1833231 | down | chr12:113623381-113630171 (+) // 87.16 // q24.13 |
| 228664_at    | <i>LOC100507602</i>      | -2.182992  | -1.1263069 | 2.182992  | down | chr5:180688243-180691455 (+) // 47.79 // q35.3   |
| 218633_x_at  | <i>ABHD10</i>            | -2.18293   | -1.1262659 | 2.18293   | down | chr3:111697898-111712056 (+) // 71.3 // q13.2    |
| 225402_at    | <i>TP53RK</i>            | -2.1822546 | -1.1258194 | 2.1822546 | down | chr20:45314173-45318418 (-) // 73.21 // q13.12   |
| 201481_s_at  | <i>PYGB</i>              | -2.1819932 | -1.1256466 | 2.1819932 | down | chr20:25228780-25278647 (+) // 90.53 // p11.21   |
| 235840_at    | <i>ZKSCAN3</i>           | -2.1817963 | -1.1255164 | 2.1817963 | down | chr6:28334989-28336948 (+) // 85.59 // p22.1     |
| 221290_s_at  | <i>MUM1</i>              | -2.1815896 | -1.1253798 | 2.1815896 | down | chr19:1376632-1376964 (+) // 99.7 // p13.3       |
| 204640_s_at  | <i>SPOP</i>              | -2.1803412 | -1.1245539 | 2.1803412 | down | chr17:47677379-47755385 (-) // 99.82 // q21.33   |
| 1554271_a_at | <i>CENPL</i>             | -2.180031  | -1.1243488 | 2.180031  | down | chr1:173769017-173793271 (-) // 80.11 // q25.1   |
| 219351_at    | <i>TRAPPC2</i>           | -2.179861  | -1.1242362 | 2.179861  | down | chrX:13730361-13752711 (-) // 58.1 // p22.2      |
| 218028_at    | <i>ELOVL1</i>            | -2.178684  | -1.123457  | 2.178684  | down | chr1:43829072-43833689 (-) // 99.93 // p34.2     |
| 218143_s_at  | <i>SCAMP2</i>            | -2.1786587 | -1.1234401 | 2.1786587 | down | chr15:75137196-75165626 (-) // 99.92 // q24.1    |
| 225632_s_at  | <i>ISY1-RAB43///RAB4</i> | -2.1785574 | -1.1233732 | 2.1785574 | down | chr3:128806415-128880073 (-) // 98.66 // q21.3   |
| 1552310_at   | <i>C15orf40</i>          | -2.1772294 | -1.1224934 | 2.1772294 | down | chr15:83672957-83680390 (-) // 53.86 // q25.2    |
| 203239_s_at  | <i>CNOT3</i>             | -2.1771655 | -1.1224511 | 2.1771655 | down | chr19:54645111-54659418 (+) // 93.44 // q13.42   |
| 242787_at    |                          | -2.1759892 | -1.1216714 | 2.1759892 | down | chr11:61920663-61921191 (+) // 40.37 // q12.3    |
| 231938_at    | <i>SGOL1</i>             | -2.1757698 | -1.121526  | 2.1757698 | down | chr3:20209935-20227703 (-) // 72.22 // p24.3     |
| 234935_at    | <i>NDOR1</i>             | -2.1756825 | -1.1214681 | 2.1756825 | down | chr9:140100146-140111441 (-) // 99.36 // q34.3   |
| 202365_at    | <i>UNC119B</i>           | -2.1756413 | -1.1214406 | 2.1756413 | down | chr12:121160998-121161442 (+) // 96.94 // q24.31 |
| 244033_at    | <i>CEP128</i>            | -2.1755667 | -1.1213913 | 2.1755667 | down | chr14:80962820-80963270 (-) // 98.9 // q31.1     |
| 202091_at    | <i>OTTHUMG000001755</i>  | -2.1755233 | -1.1213624 | 2.1755233 | down | chr16:57279077-57287547 (-) // 96.27 // q13      |
| 228690_s_at  | <i>NDUFA11</i>           | -2.1754346 | -1.1213037 | 2.1754346 | down | chr19:5894685-5895502 (-) // 98.43 // p13.3      |

|              |                          |            |            |           |      |                                                  |
|--------------|--------------------------|------------|------------|-----------|------|--------------------------------------------------|
| 1554408_a_at | <i>TK1</i>               | -2.1753905 | -1.1212744 | 2.1753905 | down | chr17:76170172-76183112 (-) // 94.36 // q25.3    |
| 230085_at    | <i>PDK3</i>              | -2.1747334 | -1.1208385 | 2.1747334 | down | chrX:24558347-24558975 (+) // 87.83 // p22.11    |
| 219022_at    | <i>C12orf43</i>          | -2.174573  | -1.1207321 | 2.174573  | down | chr12:121440847-121454300 (-) // 84.17 // q24.31 |
| 231830_x_at  | <i>RAB11FIP1</i>         | -2.1741357 | -1.1204419 | 2.1741357 | down | chr8:37718962-37734701 (-) // 89.39 // p11.23    |
| 218642_s_at  | <i>CHCHD7</i>            | -2.1739273 | -1.1203038 | 2.1739273 | down | chr8:57124356-57131174 (+) // 82.5 // q12.1      |
| 227445_at    | <i>ZNF689</i>            | -2.1732666 | -1.1198652 | 2.1732666 | down | chr16:30614701-30616225 (-) // 67.6 // p11.2     |
| 225201_s_at  | <i>MRPL14</i>            | -2.1732101 | -1.1198276 | 2.1732101 | down | chr6:44081373-44095194 (-) // 97.3 // p21.1      |
| 213126_at    | <i>MED8</i>              | -2.1724691 | -1.1193357 | 2.1724691 | down | chr1:43849587-43854358 (-) // 88.65 // p34.2     |
| 221892_at    | <i>H6PD</i>              | -2.171606  | -1.1187625 | 2.171606  | down | chr1:9328529-9331396 (+) // 89.63 // p36.22      |
| 213232_at    | <i>KIAA1467</i>          | -2.1715379 | -1.1187172 | 2.1715379 | down | chr12:13214546-13236385 (-) // 91.72 // p13.1    |
| 204265_s_at  | <i>GPSM3</i>             | -2.1711848 | -1.1184825 | 2.1711848 | down | chr6:32158543-32163300 (-) // 93.21 // p21.32    |
| 211299_s_at  | <i>FLOT2</i>             | -2.1711776 | -1.1184778 | 2.1711776 | down | chr17:27206357-27224627 (-) // 90.75 // q11.2    |
| 203506_s_at  | <i>MED12</i>             | -2.1702917 | -1.1178889 | 2.1702917 | down | chrX:70338572-70362147 (+) // 94.75 // q13.1     |
| 221014_s_at  | <i>RAB33B</i>            | -2.1700587 | -1.1177341 | 2.1700587 | down | chr4:140374960-140397067 (+) // 86.69 // q31.1   |
| 214051_at    | <i>LOC101060235//TM</i>  | -2.1700006 | -1.1176953 | 2.1700006 | down | chrX:103217214-103220549 (+) // 95.79 // q22.2   |
| 238472_at    | <i>FBXO9</i>             | -2.1690233 | -1.1170455 | 2.1690233 | down | chr6:52964741-52965839 (+) // 82.18 // p12.1     |
| 223661_at    | <i>NUCKS1</i>            | -2.1685972 | -1.1167622 | 2.1685972 | down | chr1:205682320-205684230 (+) // 97.85 // q32.1   |
| 228672_at    | <i>AC114730.11//OTTH</i> | -2.1681204 | -1.1164448 | 2.1681204 | down | chr2:242664782-242665284 (-) // 100.0 // q37.3   |
| 224910_at    | <i>CARHSP1</i>           | -2.1679766 | -1.1163492 | 2.1679766 | down | chr16:8946803-8948855 (-) // 76.5 // p13.2       |
| 222500_at    | <i>PPIL1</i>             | -2.1679685 | -1.1163439 | 2.1679685 | down | chr6:36822607-36842752 (-) // 98.83 // p21.2     |
| 210130_s_at  | <i>TM7SF2</i>            | -2.1678214 | -1.1162459 | 2.1678214 | down | chr11:64879361-64883698 (+) // 99.79 // q13.1    |
| 208737_at    | <i>ATP6V1G1</i>          | -2.1676326 | -1.1161202 | 2.1676326 | down | chr9:117350044-117360335 (+) // 94.4 // q32      |
| 210567_s_at  | <i>SKP2</i>              | -2.1669729 | -1.1156812 | 2.1669729 | down | chr5:36152225-36184143 (+) // 97.77 // p13.2     |
| 1557701_s_at | <i>POLH</i>              | -2.1669648 | -1.1156757 | 2.1669648 | down | chr6:43543979-43555386 (+) // 99.88 // p21.1     |
| 232729_at    | <i>FBXO32</i>            | -2.1668816 | -1.1156204 | 2.1668816 | down | chr8:124512392-124514103 (+) // 92.62 // q24.13  |
|              |                          |            |            |           |      | chr8:144661899-144679566 (+) // 91.15 //         |
|              |                          |            |            |           |      | q24.3//chr19:14181153-14182151 (-) // 87.58 //   |
|              |                          |            |            |           |      | p13.12                                           |
| 213087_s_at  | <i>EEF1D</i>             | -2.1666396 | -1.1154592 | 2.1666396 | down |                                                  |
| 242157_at    | <i>CHD9</i>              | -2.1664047 | -1.1153028 | 2.1664047 | down | chr16:53154890-53156088 (+) // 71.43 // q12.2    |

|             |                      |            |            |           |      |                                                 |
|-------------|----------------------|------------|------------|-----------|------|-------------------------------------------------|
| 212861_at   | <i>MFSD5</i>         | -2.164952  | -1.1143351 | 2.164952  | down | chr12:53645888-53648190 (+) // 97.6 // q13.13   |
| 215159_s_at | <i>NADK</i>          | -2.1637316 | -1.1135216 | 2.1637316 | down | chr1:1684413-1693417 (-) // 96.13 // p36.33     |
| 222597_at   | <i>SNAP29</i>        | -2.1629071 | -1.1129717 | 2.1629071 | down | chr22:21213324-21244559 (+) // 98.21 // q11.21  |
| 225843_at   | <i>ZFYVE19</i>       | -2.162655  | -1.1128036 | 2.162655  | down | chr15:41099552-41106766 (+) // 95.02 // q15.1   |
| 210622_x_at | <i>CDK10</i>         | -2.1624346 | -1.1126565 | 2.1624346 | down | chr16:89753106-89762244 (+) // 99.68 // q24.3   |
| 222743_s_at | <i>C11orf71</i>      | -2.162306  | -1.1125708 | 2.162306  | down | chr11:114269253-114271244 (-) // 83.95 // q23.2 |
| 218138_at   | <i>MKKS</i>          | -2.1622424 | -1.1125283 | 2.1622424 | down | chr20:10385837-10412570 (-) // 95.52 // p12.2   |
| 210593_at   | <i>SAT1///ZSWIM8</i> | -2.1616852 | -1.1121565 | 2.1616852 | down | chrX:23801463-23804123 (+) // 68.61 // p22.11   |
| 208206_s_at | <i>RASGRP2</i>       | -2.1610541 | -1.1117352 | 2.1610541 | down | chr11:64494383-64512928 (-) // 100.0 // q13.1   |
| 212856_at   | <i>GRAMD4</i>        | -2.1607225 | -1.1115137 | 2.1607225 | down | chr22:47022711-47075682 (+) // 97.11 // q13.31  |
| 211559_s_at | <i>CCNG2</i>         | -2.160424  | -1.1113144 | 2.160424  | down | chr4:78079449-78087216 (+) // 100.0 // q21.1    |
| 238570_at   |                      | -2.159831  | -1.1109185 | 2.159831  | down | chr19:53202606-53203545 (-) // 22.28 // q13.41  |
| 203392_s_at | <i>CTBP1</i>         | -2.1596406 | -1.1107912 | 2.1596406 | down | chr4:1205287-1242791 (-) // 96.06 // p16.3      |
| 211300_s_at | <i>TP53</i>          | -2.1594086 | -1.1106362 | 2.1594086 | down | chr17:7572563-7590805 (-) // 95.57 // p13.1     |
| 225146_at   | <i>FAM219A</i>       | -2.1591346 | -1.1104532 | 2.1591346 | down | chr9:34398185-34458301 (-) // 93.15 // p13.3    |
| 220788_s_at | <i>IRF9///RNF31</i>  | -2.1581652 | -1.1098053 | 2.1581652 | down | chr14:24616708-24629869 (+) // 97.01 // q12     |
| 229424_s_at | <i>ARHGAP27</i>      | -2.158034  | -1.1097176 | 2.158034  | down | chr17:43472054-43472799 (+) // 92.47 // q21.31  |
| 206219_s_at | <i>VAV1</i>          | -2.1579642 | -1.109671  | 2.1579642 | down | chr19:6772721-6857371 (+) // 99.93 // p13.3     |
| 222158_s_at | <i>DESI2</i>         | -2.1575713 | -1.1094083 | 2.1575713 | down | chr1:244816457-244869241 (+) // 81.93 // q44    |
| 226760_at   | <i>MBTPS2</i>        | -2.1561155 | -1.1084344 | 2.1561155 | down | chrX:21901413-21903540 (+) // 79.67 // p22.11   |
| 244587_at   | <i>ATF7</i>          | -2.1558647 | -1.1082666 | 2.1558647 | down | chr12:53905839-53906483 (-) // 96.25 // q13.13  |
| 225719_s_at | <i>MRPL55</i>        | -2.155657  | -1.1081277 | 2.155657  | down | chr1:228294385-228296994 (-) // 81.67 // q42.13 |
| 218679_s_at | <i>VPS28</i>         | -2.155418  | -1.1079676 | 2.155418  | down | chr8:145648999-145652366 (-) // 96.12 // q24.3  |
| 241925_x_at | <i>SLC16A7</i>       | -2.154784  | -1.1075432 | 2.154784  | down | chr12:60180970-60183125 (+) // 88.73 // q14.1   |
| 205224_at   | <i>SURF2</i>         | -2.1544223 | -1.107301  | 2.1544223 | down | chr9:136223452-136228040 (+) // 99.02 // q34.2  |
| 202736_s_at | <i>LSM4</i>          | -2.153532  | -1.1067048 | 2.153532  | down | chr19:18417723-18434001 (-) // 92.61 // p13.11  |
| 216389_s_at | <i>DCAF11</i>        | -2.1530797 | -1.1064017 | 2.1530797 | down | chr14:24586926-24592840 (+) // 95.3 // q11.2    |
| 228929_at   | <i>DNASE1</i>        | -2.1527443 | -1.106177  | 2.1527443 | down | chr16:3714769-3715468 (+) // 76.73 // p13.3     |

|             |                         |            |            |           |      |                                                                                                        |
|-------------|-------------------------|------------|------------|-----------|------|--------------------------------------------------------------------------------------------------------|
| 212486_s_at | <i>FYN</i>              | -2.1524444 | -1.105976  | 2.1524444 | down | chr6:111981536-112194362 (-) // 94.69 // q21                                                           |
| 224129_s_at | <i>DPY30</i>            | -2.152243  | -1.1058409 | 2.152243  | down | chr2:32249030-32264823 (-) // 97.41 // p22.3                                                           |
| 220690_s_at | <i>DHRS7B</i>           | -2.1521604 | -1.1057856 | 2.1521604 | down | chr17:21030257-21094601 (+) // 99.3 // p11.2                                                           |
| 231857_s_at | <i>AGBL5</i>            | -2.1519737 | -1.1056604 | 2.1519737 | down | chr2:27274535-27279864 (+) // 93.09 // p23.3                                                           |
| 209675_s_at | <i>HNRNPUL1</i>         | -2.1517646 | -1.1055202 | 2.1517646 | down | chr19:41770362-41812943 (+) // 92.18 // q13.2                                                          |
| 228217_s_at | <i>PSMG4</i>            | -2.1507688 | -1.1048524 | 2.1507688 | down | chr6:3259203-3268300 (+) // 99.11 // p25.2                                                             |
| 210457_x_at | <i>HMGA1</i>            | -2.1507258 | -1.1048236 | 2.1507258 | down | chr6:34208512-34212974 (+) // 83.52 //<br>p21.31///chr12:110867450-110868132 (-) // 94.14<br>// q24.11 |
| 39835_at    | <i>SBF1</i>             | -2.1505663 | -1.1047167 | 2.1505663 | down | chr22:50885235-50904857 (-) // 75.68 // q13.33                                                         |
| 227879_at   | <i>ALKBH7</i>           | -2.1505659 | -1.1047163 | 2.1505659 | down | chr19:6374288-6375042 (-) // 89.54 // p13.3                                                            |
| 204828_at   | <i>RAD9A</i>            | -2.150356  | -1.1045756 | 2.150356  | down | chr11:67159439-67165880 (+) // 100.0 // q13.2                                                          |
| 218022_at   | <i>VRK3</i>             | -2.1503146 | -1.1045477 | 2.1503146 | down | chr19:50479723-50528577 (-) // 99.89 // q13.33                                                         |
| 221123_x_at | <i>FBXO16///ZNF395</i>  | -2.150077  | -1.1043885 | 2.150077  | down | chr8:28206053-28242914 (-) // 97.58 // p21.1                                                           |
| 213603_s_at | <i>RAC2</i>             | -2.1500013 | -1.1043376 | 2.1500013 | down | chr22:37621309-37622844 (-) // 58.49 // q13.1                                                          |
| 222962_s_at | <i>MCM10</i>            | -2.1496787 | -1.1041211 | 2.1496787 | down | chr10:13206126-13252311 (+) // 89.41 // p13                                                            |
| 229126_at   | <i>TMEM19</i>           | -2.1495085 | -1.1040068 | 2.1495085 | down | chr12:72097308-72097836 (+) // 38.61 // q21.1                                                          |
| 225400_at   | <i>TSEN15</i>           | -2.1485972 | -1.1033951 | 2.1485972 | down | chr1:184020796-184043342 (+) // 88.68 // q25.3                                                         |
| 215631_s_at | <i>BRMS1</i>            | -2.147583  | -1.102714  | 2.147583  | down | chr11:66104803-66109086 (-) // 96.5 // q13.2                                                           |
| 211142_x_at | <i>HLA-DOA</i>          | -2.1470103 | -1.1023291 | 2.1470103 | down | chr6:32976038-32977359 (-) // 100.0 // p21.32                                                          |
| 211080_s_at | <i>NEK2</i>             | -2.1459665 | -1.1016276 | 2.1459665 | down | chr1:211844572-211847696 (-) // 96.97 // q32.3                                                         |
| 213036_x_at | <i>ATP2A3</i>           | -2.145657  | -1.1014196 | 2.145657  | down | chr17:3827162-3867736 (-) // 97.79 // p13.2                                                            |
| 226509_at   | <i>ZNF641</i>           | -2.1448286 | -1.1008624 | 2.1448286 | down | chr12:48733565-48735708 (-) // 89.82 // q13.11                                                         |
| 50221_at    | <i>TFEB</i>             | -2.1446288 | -1.1007279 | 2.1446288 | down | chr6:41651715-41652275 (-) // 64.51 // p21.1                                                           |
| 38710_at    | <i>OTUB1</i>            | -2.1443515 | -1.1005415 | 2.1443515 | down | chr11:63753917-63765883 (+) // 88.3 // q13.1                                                           |
| 219070_s_at | <i>MOSPD3</i>           | -2.143849  | -1.1002032 | 2.143849  | down | chr7:100209814-100212999 (+) // 96.54 // q22.1                                                         |
| 204549_at   | <i>IKBKE</i>            | -2.1432579 | -1.0998054 | 2.1432579 | down | chr1:206643837-206670222 (+) // 99.88 // q32.1                                                         |
| 200752_s_at | <i>CAPN1</i>            | -2.1426954 | -1.0994269 | 2.1426954 | down | chr11:64949342-64979476 (+) // 98.14 // q13.1                                                          |
| 200622_x_at | <i>CALM1///CALM2///</i> | -2.1425571 | -1.0993338 | 2.1425571 | down | chr19:47104548-47114039 (+) // 95.38 // q13.32                                                         |



|             |                |            |            |           |      |                                                                                           |
|-------------|----------------|------------|------------|-----------|------|-------------------------------------------------------------------------------------------|
| 211230_s_at | <i>PIK3CD</i>  | -2.1413348 | -1.0985104 | 2.1413348 | down | chr1:9770255-9787285 (+) // 96.48 // p36.22                                               |
| 227114_at   | <i>RNF214</i>  | -2.1410213 | -1.0982991 | 2.1410213 | down | chr11:117152790-117156418 (+) // 99.83 // q23.3                                           |
| 214339_s_at | <i>MAP4K1</i>  | -2.1398058 | -1.0974799 | 2.1398058 | down | chr19:39078280-39086635 (-) // 95.75 // q13.2                                             |
| 210594_x_at | <i>MPZL1</i>   | -2.1394448 | -1.0972365 | 2.1394448 | down | chr7:64196264-64197121 (-) // 95.48 // q11.21                                             |
| 239342_at   | <i>DGKZ</i>    | -2.1388066 | -1.096806  | 2.1388066 | down | chr11:46399160-46399667 (+) // 13.02 // p11.2                                             |
| 209196_at   | <i>WDR46</i>   | -2.1387157 | -1.0967448 | 2.1387157 | down | chr6:33246885-33256991 (-) // 98.51 // p21.32                                             |
| 35156_at    | <i>R3HCC1</i>  | -2.1373932 | -1.0958524 | 2.1373932 | down | chr8:23146017-23153791 (+) // 85.98 // p21.3                                              |
| 213104_at   | <i>TSR3</i>    | -2.1369998 | -1.0955868 | 2.1369998 | down | chr16:1399240-1401912 (-) // 92.63 // p13.3                                               |
| 36566_at    | <i>CTNS</i>    | -2.1368911 | -1.0955135 | 2.1368911 | down | chr17:3540015-3564828 (+) // 95.42 // p13.2                                               |
| 202247_s_at | <i>MTA1</i>    | -2.136705  | -1.0953877 | 2.136705  | down | chr14:105905006-105937064 (+) // 93.11 // q32.33                                          |
| 1553990_at  | <i>BRICD5</i>  | -2.1353996 | -1.094506  | 2.1353996 | down | chr16:2259253-2261317 (-) // 87.3 // p13.3                                                |
| 227568_at   | <i>HECTD2</i>  | -2.1347744 | -1.0940837 | 2.1347744 | down | chr10:93272327-93274515 (+) // 98.78 // q23.32                                            |
| 228815_s_at | <i>REPIN1</i>  | -2.1346333 | -1.0939882 | 2.1346333 | down | chr7:150069636-150070725 (-) // 99.45 // q36.1                                            |
| 218058_at   | <i>CXXC1</i>   | -2.1338792 | -1.0934784 | 2.1338792 | down | chr18:47808718-47814188 (-) // 97.59 // q21.1                                             |
| 213577_at   | <i>SQLE</i>    | -2.1337373 | -1.0933826 | 2.1337373 | down | chr8:126010754-126021476 (+) // 98.92 // q24.13                                           |
| 209051_s_at | <i>RALGDS</i>  | -2.1333702 | -1.0931343 | 2.1333702 | down | chr9:135973583-135996552 (-) // 94.18 // q34.2                                            |
| 224902_at   | <i>PDPR</i>    | -2.133118  | -1.0929637 | 2.133118  | down | chr16:70191488-70196434 (+) // 94.63 // q22.1                                             |
| 223453_s_at | <i>ATL3</i>    | -2.1326532 | -1.0926495 | 2.1326532 | down | chr11:63352089-63438877 (-) // 85.82 // q12.3                                             |
| 219760_at   | <i>LIN7B</i>   | -2.132487  | -1.0925369 | 2.132487  | down | chr19:49617660-49621716 (+) // 94.3 // q13.33                                             |
| 203677_s_at | <i>TARBP2</i>  | -2.1323566 | -1.0924487 | 2.1323566 | down | chr12:53895104-53900208 (+) // 99.86 // q13.13                                            |
| 224944_at   | <i>TMPO</i>    | -2.1318607 | -1.0921131 | 2.1318607 | down | chr12:98943062-98944129 (+) // 81.7 // q23.1                                              |
|             |                |            |            |           |      | chrX:1522033-1571756 (-) // 98.14 // p22.33///chrY:1472033-1521756 (-) // 98.14 // p11.32 |
| 209394_at   | <i>ASMTL</i>   | -2.1310744 | -1.091581  | 2.1310744 | down |                                                                                           |
| 214326_x_at | <i>JUND</i>    | -2.1304677 | -1.0911702 | 2.1304677 | down | chr19:18391013-18391448 (-) // 99.54 // p13.11                                            |
| 228671_at   | <i>TMEM201</i> | -2.1303391 | -1.0910832 | 2.1303391 | down | chr1:9671843-9674933 (+) // 94.07 // p36.22                                               |
| 222217_s_at | <i>SLC27A3</i> | -2.1296413 | -1.0906105 | 2.1296413 | down | chr1:153749071-153752632 (+) // 97.55 // q21.3                                            |
| 205002_at   | <i>AHDC1</i>   | -2.1292934 | -1.0903748 | 2.1292934 | down | chr1:27861191-27875219 (-) // 98.48 // p36.11                                             |
| 1553244_at  | <i>FANCB</i>   | -2.1292806 | -1.090366  | 2.1292806 | down | chrX:14861528-14891191 (-) // 98.13 // p22.2                                              |

|             |                                 |            |            |           |      |                                                  |
|-------------|---------------------------------|------------|------------|-----------|------|--------------------------------------------------|
| 222590_s_at | <i>NLK</i>                      | -2.129222  | -1.0903263 | 2.129222  | down | chr17:26369689-26521921 (+) // 95.91 // q11.2    |
| 223210_at   | <i>CHURC1</i>                   | -2.12898   | -1.0901623 | 2.12898   | down | chr14:65381161-65399354 (+) // 82.38 // q23.3    |
| 218355_at   | <i>KIF4A</i>                    | -2.128531  | -1.089858  | 2.128531  | down | chrX:69509961-69640675 (+) // 97.88 // q13.1     |
| 203183_s_at | <i>SMARCD1</i>                  | -2.1284695 | -1.0898165 | 2.1284695 | down | chr12:50479006-50494056 (+) // 97.36 // q13.12   |
| 227978_s_at | <i>ZADH2</i>                    | -2.1283238 | -1.0897176 | 2.1283238 | down | chr18:72910828-72911914 (-) // 95.37 // q22.3    |
| 201052_s_at | <i>PSMF1</i>                    | -2.127997  | -1.0894961 | 2.127997  | down | chr20:1099269-1148171 (+) // 84.41 // p13        |
| 218828_at   | <i>C17orf61-PLSCR3</i> ///      | -2.1273472 | -1.0890555 | 2.1273472 | down | chr17:7293054-7297889 (-) // 99.29 // p13.1      |
| 226240_at   | <i>TADA2B</i>                   | -2.127296  | -1.0890207 | 2.127296  | down | chr4:7055828-7058364 (+) // 98.05 // p16.1       |
| 228901_at   | <i>CDK9</i>                     | -2.1271796 | -1.0889419 | 2.1271796 | down | chr9:130548329-130550938 (-) // 87.07 // q34.11  |
|             |                                 |            |            |           |      | chr22:25714222-25716189 (+) // 96.16 //          |
|             |                                 |            |            |           |      | q11.23///chr22:23915316-23982614 (-) // 93.66 // |
|             |                                 |            |            |           |      | q11.23                                           |
| 215946_x_at | <i>IPLL3P</i>                   | -2.1271138 | -1.0888972 | 2.1271138 | down | chr12:49426972-49427441 (+) // 79.55 // q13.12   |
| 216382_s_at |                                 | -2.1266894 | -1.0886093 | 2.1266894 | down | chr2:70485242-70507107 (+) // 72.61 // p13.3     |
| 203803_at   | <i>PCYOX1</i>                   | -2.1263542 | -1.088382  | 2.1263542 | down | chr5:82373450-82649157 (+) // 98.97 // q14.2     |
| 205071_x_at | <i>XRCC4</i>                    | -2.1255162 | -1.0878133 | 2.1255162 | down | chr16:70514471-70557448 (-) // 96.73 // q22.1    |
| 212189_s_at | <i>COG4</i>                     | -2.1248214 | -1.0873417 | 2.1248214 | down | chr19:47222769-47249687 (-) // 97.52 // q13.32   |
| 217903_at   | <i>STRN4</i>                    | -2.1245632 | -1.0871663 | 2.1245632 | down | chrX:47053391-47074526 (+) // 99.59 // p11.23    |
| 200964_at   | <i>UBA1</i>                     | -2.124509  | -1.0871295 | 2.124509  | down | chr9:131019159-131023841 (-) // 97.19 // q34.11  |
| 204384_at   | <i>GOLGA2</i>                   | -2.124509  | -1.0871295 | 2.124509  | down | chr6:144416021-144416694 (-) // 95.46 // q24.2   |
| 221263_s_at | <i>SF3B5</i>                    | -2.1235633 | -1.086487  | 2.1235633 | down | chr3:48506918-48509043 (+) // 98.14 // p21.31    |
| 205875_s_at | <i>TREX1</i>                    | -2.1232553 | -1.0862778 | 2.1232553 | down | chr10:75550880-75561550 (+) // 97.69 // q22.2    |
| 212359_s_at | <i>ZSWIM8</i>                   | -2.1232412 | -1.0862682 | 2.1232412 | down | chr3:50405226-50405628 (+) // 84.28 // p21.31    |
| 229636_at   |                                 | -2.1218755 | -1.08534   | 2.1218755 | down | chr1:95448727-95538431 (+) // 100.0 // p21.3     |
| 228871_at   | <i>ALG14</i>                    | -2.1212494 | -1.0849142 | 2.1212494 | down | chr5:70196522-70203941 (+) // 97.95 //           |
|             |                                 |            |            |           |      | q13.2///chr5:69321104-69328522 (+) // 97.95 //   |
|             |                                 |            |            |           |      | q13.2                                            |
| 223539_s_at | <i>SERF1A</i> /// <i>SERF1B</i> | -2.1210763 | -1.0847965 | 2.1210763 | down | chr16:3451243-3455042 (+) // 98.64 // p13.3      |
| 210290_at   | <i>ZNF174</i>                   | -2.1209648 | -1.0847207 | 2.1209648 | down | chr22:46693284-46726423 (+) // 87.84 // q13.31   |
| 204318_s_at | <i>GTSE1</i>                    | -2.1208913 | -1.0846707 | 2.1208913 | down |                                                  |

|              |                              |            |            |           |      |                                                 |
|--------------|------------------------------|------------|------------|-----------|------|-------------------------------------------------|
| 201167_x_at  | <i>ARHGDI1</i>               | -2.120627  | -1.0844909 | 2.120627  | down | chr17:79826731-79827826 (-) // 100.0 // q25.3   |
| 218170_at    | <i>ISOC1</i>                 | -2.120321  | -1.0842828 | 2.120321  | down | chr5:128430439-128449831 (+) // 96.89 // q23.3  |
| 200919_at    | <i>PHC2</i>                  | -2.1201363 | -1.084157  | 2.1201363 | down | chr1:33789226-33815504 (-) // 92.17 // p35.1    |
| 201954_at    | <i>ARPC1B</i>                | -2.1196826 | -1.0838482 | 2.1196826 | down | chr7:98972345-98992321 (+) // 97.97 // q22.1    |
| 218519_at    | <i>SLC35A5</i>               | -2.119604  | -1.0837948 | 2.119604  | down | chr3:112280953-112303002 (+) // 96.56 // q13.2  |
| 212708_at    | <i>MSL1</i>                  | -2.1193821 | -1.0836438 | 2.1193821 | down | chr17:38276998-38286563 (+) // 82.96 // q21.1   |
| 203623_at    | <i>PLXNA3</i>                | -2.1181443 | -1.0828009 | 2.1181443 | down | chrX:153686620-153701984 (+) // 97.38 // q28    |
| 47069_at     | <i>PRR5</i>                  | -2.1176584 | -1.0824699 | 2.1176584 | down | chr22:45133086-45133561 (+) // 76.37 // q13.31  |
| 209078_s_at  | <i>TXN2</i>                  | -2.117473  | -1.0823435 | 2.117473  | down | chr22:36863761-36876884 (-) // 99.83 // q12.3   |
| 1555872_a_at | <i>LOC728903</i> ///MGC21511 | -2.1173475 | -1.0822581 | 2.1173475 | down | chr9:44401811-44402333 (+) // 49.07 // p11.2    |
| 219373_at    | <i>DPM3</i>                  | -2.1169562 | -1.0819914 | 2.1169562 | down | chr1:155112368-155112723 (-) // 92.89 // q22    |
| 1553696_s_at | <i>ZNF569</i>                | -2.116093  | -1.081403  | 2.116093  | down | chr19:37902058-37958339 (-) // 70.56 // q13.12  |
| 224580_at    | <i>SLC38A1</i>               | -2.1160147 | -1.0813497 | 2.1160147 | down | chr12:46576837-46581581 (-) // 90.92 // q13.11  |
| 225907_at    | <i>LOC728743</i>             | -2.115946  | -1.0813029 | 2.115946  | down | chr7:150097789-150109557 (+) // 75.52 // q36.1  |
| 207565_s_at  | <i>MR1</i>                   | -2.1158137 | -1.0812126 | 2.1158137 | down | chr1:181003138-181024633 (+) // 100.0 // q25.3  |
| 226638_at    | <i>ARHGAP23</i>              | -2.1151977 | -1.0807924 | 2.1151977 | down | chr17:36667190-36668628 (+) // 94.58 // q12     |
| 1555758_a_at | <i>CDKN3</i>                 | -2.1150844 | -1.0807152 | 2.1150844 | down | chr14:54866610-54878352 (+) // 96.81 // q22.2   |
| 203709_at    | <i>PHKG2</i>                 | -2.1148    | -1.0805212 | 2.1148    | down | chr16:30759736-30768682 (+) // 100.0 // p11.2   |
| 212083_at    | <i>TEX261</i>                | -2.1146846 | -1.0804425 | 2.1146846 | down | chr2:71213073-71221986 (-) // 66.39 // p13.3    |
| 226191_at    | <i>GSK3B</i>                 | -2.114638  | -1.0804108 | 2.114638  | down | chr3:119540167-119541597 (-) // 97.23 // q13.33 |
| 223635_s_at  | <i>SSBP3</i>                 | -2.1141646 | -1.0800877 | 2.1141646 | down | chr1:54692594-54871707 (-) // 97.81 // p32.3    |
| 224750_at    | <i>RNF185</i>                | -2.1140811 | -1.0800307 | 2.1140811 | down | chr22:31556215-31603002 (+) // 94.71 // q12.2   |
| 213606_s_at  | <i>ARHGDI1</i>               | -2.1131814 | -1.0794165 | 2.1131814 | down | chr17:79825596-79827834 (-) // 87.11 // q25.3   |
| 209464_at    | <i>AURKB</i>                 | -2.1120234 | -1.0786258 | 2.1120234 | down | chr17:8108119-8113874 (-) // 96.49 // p13.1     |
| 226878_at    | <i>HLA-DOA</i>               | -2.111432  | -1.0782218 | 2.111432  | down | chr6:32971958-32972876 (-) // 96.02 // p21.32   |
| 1558062_at   | <i>FBXO10</i>                | -2.1112378 | -1.078089  | 2.1112378 | down | chr9:37529159-37592756 (-) // 99.39 // p13.2    |
| 211208_s_at  | <i>CASK</i>                  | -2.1111338 | -1.0780181 | 2.1111338 | down | chrX:41378779-41449204 (-) // 99.93 // p11.4    |
| 218887_at    | <i>MRPL2</i>                 | -2.1109257 | -1.0778759 | 2.1109257 | down | chr6:43021766-43027157 (-) // 92.2 // p21.1     |

|              |                   |            |            |           |      |                                                 |
|--------------|-------------------|------------|------------|-----------|------|-------------------------------------------------|
| 218939_at    | <i>LETM1</i>      | -2.1109126 | -1.0778668 | 2.1109126 | down | chr4:1814759-1857974 (-) // 96.95 // p16.3      |
| 217786_at    | <i>PRMT5</i>      | -2.1108932 | -1.0778537 | 2.1108932 | down | chr14:23390030-23398570 (-) // 99.75 // q11.2   |
| 209947_at    | <i>UBAP2L</i>     | -2.1105938 | -1.077649  | 2.1105938 | down | chr1:154197557-154243328 (+) // 98.61 // q21.3  |
| 213530_at    | <i>RAB3GAP1</i>   | -2.1103017 | -1.0774493 | 2.1103017 | down | chr2:135926629-135927856 (+) // 76.62 // q21.3  |
| 1556479_at   |                   | -2.1101866 | -1.0773705 | 2.1101866 | down | chr18:13471010-13472717 (+) // 93.3 // p11.21   |
| 230894_s_at  |                   | -2.1095428 | -1.0769304 | 2.1095428 | down | chr17:55761042-55761787 (-) // 99.46 // q22     |
| 218534_s_at  | <i>AGGF1</i>      | -2.1084735 | -1.0761989 | 2.1084735 | down | chr5:76342414-76359916 (+) // 99.52 // q13.3    |
| 221820_s_at  | <i>KAT8</i>       | -2.1070406 | -1.0752181 | 2.1070406 | down | chr16:31128986-31142712 (+) // 96.75 // p11.2   |
| 213562_s_at  | <i>SQLE</i>       | -2.1068823 | -1.0751097 | 2.1068823 | down | chr8:126010754-126021476 (+) // 98.92 // q24.13 |
| 1555677_s_at | <i>SMC1A</i>      | -2.1066735 | -1.0749667 | 2.1066735 | down | chrX:53439958-53449585 (-) // 56.55 // p11.22   |
| 233666_at    | <i>TMEM106B</i>   | -2.1065698 | -1.0748957 | 2.1065698 | down | chr7:12271073-12273303 (-) // 98.21 // p21.3    |
| 41397_at     | <i>ZNF821</i>     | -2.1065497 | -1.0748819 | 2.1065497 | down | chr16:71893587-71917412 (-) // 94.15 // q22.2   |
| 229680_at    | <i>TACO1</i>      | -2.106455  | -1.0748172 | 2.106455  | down | chr17:61678363-61682000 (-) // 98.31 // q23.3   |
| 204290_s_at  | <i>ALDH6A1</i>    | -2.1061797 | -1.0746286 | 2.1061797 | down | chr14:74527222-74551139 (-) // 99.49 // q24.3   |
| 213986_s_at  | <i>TMEM259</i>    | -2.1061585 | -1.0746139 | 2.1061585 | down | chr19:1011172-1014303 (-) // 97.44 // p13.3     |
| 228856_at    | <i>ZNF747</i>     | -2.1060514 | -1.0745406 | 2.1060514 | down | chr16:30541691-30542323 (-) // 98.59 // p11.2   |
| 226081_at    | <i>LZIC</i>       | -2.1060379 | -1.0745314 | 2.1060379 | down | chr1:9988997-10002843 (-) // 77.85 // p36.22    |
| 227362_at    | <i>SLC2A4RG</i>   | -2.10597   | -1.0744848 | 2.10597   | down | chr20:62373879-62374824 (-) // 94.72 // q13.33  |
| 202806_at    | <i>DBN1</i>       | -2.1059499 | -1.0744711 | 2.1059499 | down | chr5:176883927-176900616 (-) // 98.32 // q35.3  |
| 220058_at    | <i>GID4</i>       | -2.1056108 | -1.0742389 | 2.1056108 | down | chr17:17942949-17968597 (+) // 94.49 // p11.2   |
| 221620_s_at  | <i>APOO</i>       | -2.104222  | -1.0732869 | 2.104222  | down | chrX:23851483-23926020 (-) // 99.24 // p22.11   |
| 202368_s_at  | <i>TRAM2</i>      | -2.1033266 | -1.0726728 | 2.1033266 | down | chr6:52362205-52441792 (-) // 92.91 // p12.2    |
| 224582_s_at  | <i>NUCKS1</i>     | -2.1030447 | -1.0724795 | 2.1030447 | down | chr1:205682320-205686339 (-) // 95.13 // q32.1  |
| 225063_at    | <i>UBL7</i>       | -2.1029966 | -1.0724466 | 2.1029966 | down | chr15:74738317-74751238 (-) // 93.87 // q24.1   |
| 209714_s_at  | <i>CDKN3</i>      | -2.1029172 | -1.072392  | 2.1029172 | down | chr14:54866610-54886826 (+) // 98.51 // q22.2   |
| 229227_at    | <i>DICER1-AS1</i> | -2.1024632 | -1.0720806 | 2.1024632 | down | chr14:95624014-95646265 (+) // 41.55 // q32.13  |
| 212055_at    | <i>TPGS2</i>      | -2.1015425 | -1.0714487 | 2.1015425 | down | chr18:34375589-34408987 (-) // 83.72 // q12.2   |
| 226855_at    | <i>PDP2</i>       | -2.1013298 | -1.0713025 | 2.1013298 | down | chr16:66922148-66925002 (+) // 76.41 // q22.1   |

|              |                |            |            |           |      |                                                  |
|--------------|----------------|------------|------------|-----------|------|--------------------------------------------------|
| 215509_s_at  | <i>BUB1</i>    | -2.1012626 | -1.0712565 | 2.1012626 | down | chr2:111415790-111417701 (-) // 61.06 // q13     |
| 202954_at    | <i>UBE2C</i>   | -2.1010482 | -1.0711093 | 2.1010482 | down | chr20:44441302-44445590 (+) // 96.55 // q13.12   |
| 224605_at    | <i>C4orf3</i>  | -2.1008794 | -1.0709933 | 2.1008794 | down | chr4:120218423-120221838 (-) // 58.1 // q26      |
| 204835_at    | <i>POLA1</i>   | -2.099762  | -1.0702257 | 2.099762  | down | chrX:24712063-25015100 (+) // 98.97 // p22.11    |
| 204478_s_at  | <i>RAB1F</i>   | -2.0994754 | -1.0700289 | 2.0994754 | down | chr1:202849587-202858237 (-) // 96.75 // q32.1   |
| 234665_x_at  | <i>HHLA3</i>   | -2.0990932 | -1.0697663 | 2.0990932 | down |                                                  |
| 203415_at    | <i>PDCD6</i>   | -2.0989916 | -1.0696964 | 2.0989916 | down | chr5:271804-314916 (+) // 99.89 // p15.33        |
| 244030_at    | <i>STYX</i>    | -2.0985644 | -1.0694027 | 2.0985644 | down | chr14:53238879-53240098 (+) // 96.23 // q22.1    |
| 213862_at    |                | -2.0983953 | -1.0692866 | 2.0983953 | down | chr11:819703-822576 (-) // 95.26 // p15.5        |
| 206016_at    | <i>CCDC22</i>  | -2.0982244 | -1.069169  | 2.0982244 | down | chrX:49092010-49106980 (+) // 99.96 // p11.23    |
| 224726_at    | <i>MIB1</i>    | -2.0979278 | -1.068965  | 2.0979278 | down | chr18:19395721-19450914 (+) // 97.29 // q11.2    |
| 238514_at    | <i>TMEM25</i>  | -2.0977366 | -1.0688336 | 2.0977366 | down | chr11:118402240-118405071 (+) // 79.24 // q23.3  |
| 200805_at    | <i>LMAN2</i>   | -2.0965827 | -1.0680397 | 2.0965827 | down | chr5:176758750-176778648 (-) // 100.0 // q35.3   |
| 1553677_a_at | <i>TIPRL</i>   | -2.095432  | -1.0672477 | 2.095432  | down | chr1:168148176-168169885 (+) // 98.15 // q24.2   |
| 209117_at    | <i>WBP2</i>    | -2.0947855 | -1.0668025 | 2.0947855 | down | chr17:73841972-73851387 (-) // 96.81 // q25.1    |
| 224790_at    | <i>ASAP1</i>   | -2.0942693 | -1.066447  | 2.0942693 | down | chr8:131064352-131193108 (-) // 98.11 // q24.21  |
| 205541_s_at  | <i>GSPT2</i>   | -2.094114  | -1.0663401 | 2.094114  | down | chrX:51486543-51489023 (+) // 99.76 // p11.22    |
| 227212_s_at  | <i>PHF19</i>   | -2.0939708 | -1.0662413 | 2.0939708 | down | chr9:123631852-123639499 (-) // 83.54 // q33.2   |
| 238684_at    | <i>SETDB2</i>  | -2.0926325 | -1.065319  | 2.0926325 | down | chr13:50068731-50069134 (+) // 85.38 // q14.2    |
| 201961_s_at  | <i>RNF41</i>   | -2.0926077 | -1.0653019 | 2.0926077 | down | chr12:56598284-56615704 (-) // 98.58 // q13.2    |
| 1553120_at   | <i>CLSPN</i>   | -2.0924828 | -1.0652157 | 2.0924828 | down | chr1:36201793-36235568 (-) // 95.74 // p34.3     |
| 203745_at    | <i>HCCS</i>    | -2.0922825 | -1.0650777 | 2.0922825 | down | chrX:11129420-11141195 (+) // 97.29 // p22.2     |
| 1555460_a_at | <i>SLC39A6</i> | -2.0919437 | -1.0648441 | 2.0919437 | down | chr18:33690962-33709348 (-) // 94.2 // q12.2     |
| 222994_at    | <i>PRDX5</i>   | -2.091922  | -1.0648291 | 2.091922  | down | chr11:64085578-64088542 (+) // 82.82 // q13.1    |
| 235621_at    | <i>FAHD2A</i>  | -2.0917616 | -1.0647185 | 2.0917616 | down | chr2:96080612-96081368 (+) // 99.34 // q11.1     |
| 202135_s_at  | <i>ACTR1B</i>  | -2.09122   | -1.0643448 | 2.09122   | down | chr2:98272430-98280384 (-) // 99.81 // q11.2     |
| 243196_s_at  | <i>TRAFD1</i>  | -2.0901458 | -1.0636036 | 2.0901458 | down | chr12:112590759-112591403 (+) // 99.66 // q24.13 |
| 1552680_a_at | <i>CASC5</i>   | -2.089871  | -1.0634139 | 2.089871  | down | chr15:40886446-40954400 (+) // 98.37 // q15.1    |

|              |                                  |            |            |           |      |                                                                                             |
|--------------|----------------------------------|------------|------------|-----------|------|---------------------------------------------------------------------------------------------|
| 1556061_at   | <i>RPP30</i>                     | -2.0897436 | -1.0633259 | 2.0897436 | down | chr10:92664395-92668315 (+) // 46.29 // q23.31                                              |
| 218382_s_at  | <i>U2AF2</i>                     | -2.08974   | -1.0633235 | 2.08974   | down | chr19:56166430-56185670 (+) // 99.71 // q13.42                                              |
| 200695_at    | <i>PPP2R1A</i>                   | -2.0896523 | -1.0632629 | 2.0896523 | down | chr19:52693304-52729482 (+) // 92.27 // q13.41                                              |
| 221940_at    | <i>RPUSD2</i>                    | -2.0894456 | -1.0631201 | 2.0894456 | down | chr15:40861509-40866891 (+) // 90.52 // q15.1                                               |
| 230719_at    | <i>ING3</i>                      | -2.0890129 | -1.0628214 | 2.0890129 | down | chr7:120616750-120617272 (+) // 85.98 // q31.31                                             |
| 224729_s_at  | <i>ATPAF1</i>                    | -2.0885754 | -1.0625192 | 2.0885754 | down | chr1:47098412-47101725 (-) // 71.77 // p33                                                  |
| 223626_x_at  | <i>IFI27L2</i>                   | -2.088333  | -1.0623517 | 2.088333  | down | chr14:94594120-94595923 (-) // 100.0 // q32.12                                              |
| 214273_x_at  | <i>NPRL3</i>                     | -2.0881686 | -1.0622382 | 2.0881686 | down | chr16:134263-136847 (-) // 96.77 // p13.3                                                   |
| 225592_at    | <i>NRM</i>                       | -2.0881085 | -1.0621967 | 2.0881085 | down | chr6:30655823-30658748 (-) // 91.56 // p21.33                                               |
| 203303_at    | <i>DYNLT3</i>                    | -2.0880096 | -1.0621283 | 2.0880096 | down | chrX:37698088-37706831 (-) // 96.66 // p11.4                                                |
| 210009_s_at  | <i>GOSR2</i>                     | -2.0877607 | -1.0619563 | 2.0877607 | down | chr17:45000527-45018161 (+) // 97.83 // q21.32                                              |
| 206441_s_at  | <i>COMMD4</i>                    | -2.087748  | -1.0619476 | 2.087748  | down | chr15:75628399-75632612 (+) // 97.17 // q24.2                                               |
| 214716_at    | <i>BMP2K</i>                     | -2.0877218 | -1.0619295 | 2.0877218 | down | chr4:79780320-79834371 (+) // 94.49 // q21.21                                               |
| 202971_s_at  | <i>DYRK2</i>                     | -2.0865698 | -1.0611331 | 2.0865698 | down | chr12:68042753-68054143 (+) // 97.23 // q15                                                 |
| 214275_at    | <i>MED12</i>                     | -2.085784  | -1.0605897 | 2.085784  | down | chrX:70339220-70341198 (-) // 89.21 // q13.1                                                |
| 218837_s_at  | <i>UBE2D4</i>                    | -2.0856607 | -1.0605046 | 2.0856607 | down | chr7:43966071-43993163 (+) // 91.37 // p13                                                  |
| 219978_s_at  | <i>NUSAP1</i>                    | -2.085387  | -1.0603151 | 2.085387  | down | chr15:41625077-41650408 (+) // 98.15 // q15.1                                               |
| 212574_x_at  | <i>TMEM259</i>                   | -2.0843961 | -1.0596294 | 2.0843961 | down | chr19:1010066-1021248 (-) // 95.21 // p13.3                                                 |
| 217782_s_at  | <i>GPS1</i>                      | -2.0842693 | -1.0595417 | 2.0842693 | down | chr17:80009770-80015346 (+) // 98.82 // q25.3                                               |
| 213996_at    | <i>YPEL1</i>                     | -2.0841777 | -1.0594783 | 2.0841777 | down | chr22:22054764-22090066 (-) // 71.17 // q11.21                                              |
| 216952_s_at  | <i>LMNB2</i>                     | -2.0840173 | -1.0593672 | 2.0840173 | down | chr19:2428164-2431900 (-) // 98.65 // p13.3                                                 |
| 210023_s_at  | <i>PCGF1</i>                     | -2.0839257 | -1.0593039 | 2.0839257 | down | chr2:74732170-74734786 (-) // 96.24 // p13.1                                                |
| 1559672_a_at | <i>CCDC171</i>                   | -2.08352   | -1.0590229 | 2.08352   | down | chr9:15744630-15874728 (+) // 97.74 // p22.3                                                |
| 242752_at    | <i>PPM1K</i>                     | -2.083287  | -1.0588616 | 2.083287  | down | chr4:89180735-89181200 (-) // 82.15 // q22.1                                                |
|              |                                  |            |            |           |      | chr7:143306174-143307659 (+) // 50.2 // q35 // chr7:143548469-143549946 (-) // 50.33 // q35 |
| 212979_s_at  | <i>FAM115A</i> // <i>LOC1002</i> | -2.0827606 | -1.058497  | 2.0827606 | down |                                                                                             |
| 224987_at    | <i>C6orf89</i>                   | -2.082715  | -1.0584655 | 2.082715  | down | chr6:36867201-36894325 (+) // 90.68 // p21.2                                                |
| 227681_at    | <i>ZFP36L2</i>                   | -2.0822797 | -1.0581639 | 2.0822797 | down | chr2:43451300-43451955 (+) // 74.58 // p21                                                  |

|              |                       |            |            |           |      |                                                 |
|--------------|-----------------------|------------|------------|-----------|------|-------------------------------------------------|
| 218770_s_at  | <i>TMEM39B</i>        | -2.082227  | -1.0581274 | 2.082227  | down | chr1:32538528-32568465 (+) // 99.89 // p35.1    |
| 208336_s_at  | <i>TECR</i>           | -2.082213  | -1.0581176 | 2.082213  | down | chr19:14673332-14676792 (+) // 90.78 // p13.12  |
| 1556555_at   | <i>LOC100129461</i>   | -2.0821376 | -1.0580654 | 2.0821376 | down | chr6:5030205-5043823 (+) // 30.93 // p25.1      |
| 1554834_a_at | <i>RASSF5</i>         | -2.0821362 | -1.0580643 | 2.0821362 | down | chr1:206680878-206761044 (+) // 98.34 // q32.1  |
| 231207_at    |                       | -2.0820785 | -1.0580244 | 2.0820785 | down |                                                 |
| 226788_at    | <i>CENPT</i>          | -2.0820158 | -1.057981  | 2.0820158 | down | chr16:67877069-67877598 (-) // 99.81 // q22.1   |
| 228163_at    | <i>ST6GALNAC4</i>     | -2.0819733 | -1.0579516 | 2.0819733 | down | chr9:130670588-130674673 (+) // 99.61 // q34.11 |
| 228535_at    | <i>RAD1</i>           | -2.0818129 | -1.0578403 | 2.0818129 | down | chr5:34905368-34906196 (-) // 80.16 // p13.2    |
| 201119_s_at  | <i>COX8A</i>          | -2.080725  | -1.0570862 | 2.080725  | down | chr11:63742111-63744014 (+) // 100.0 // q13.1   |
| 213746_s_at  | <i>FLNA</i>           | -2.0804393 | -1.0568882 | 2.0804393 | down | chrX:153576899-153587695 (-) // 98.02 // q28    |
| 227327_at    | <i>MEGF8</i>          | -2.0803113 | -1.0567994 | 2.0803113 | down | chr19:42882289-42882917 (+) // 58.26 // q13.2   |
| 238591_at    |                       | -2.0800438 | -1.0566139 | 2.0800438 | down | chr17:80398248-80398938 (-) // 93.86 // q25.3   |
| 225383_at    | <i>ZNF275</i>         | -2.079906  | -1.0565183 | 2.079906  | down | chrX:152599624-152618383 (+) // 74.96 // q28    |
| 222425_s_at  | <i>POLDIP2</i>        | -2.079865  | -1.0564898 | 2.079865  | down | chr17:26674207-26684545 (-) // 95.95 // q11.2   |
| 217614_at    |                       | -2.0795197 | -1.0562505 | 2.0795197 | down | chr19:1087039-1087830 (+) // 27.43 // p13.3     |
|              |                       |            |            |           |      | chr12:31226851-31257725 (+) // 99.15 //         |
|              |                       |            |            |           |      | p11.21///chr12:9436318-9466684 (+) // 97.78 //  |
|              |                       |            |            |           |      | p13.31///chr12:9570308-9600751 (-) // 97.83 //  |
|              |                       |            |            |           |      | p13.31                                          |
| 208149_x_at  | <i>DDX11</i>          | -2.0794318 | -1.0561894 | 2.0794318 | down | chr2:100167815-100720970 (-) // 98.03 // q11.2  |
| 205735_s_at  | <i>AFF3</i>           | -2.0793238 | -1.0561144 | 2.0793238 | down | chr17:43138680-43186574 (+) // 97.85 // q21.31  |
| 201157_s_at  | <i>NMT1</i>           | -2.078605  | -1.0556157 | 2.078605  | down | chr9:130697381-130700128 (-) // 99.78 // q34.11 |
| 209391_at    | <i>DPM2</i>           | -2.0784283 | -1.0554929 | 2.0784283 | down | chr12:54628035-54630076 (-) // 84.35 // q13.13  |
| 226085_at    | <i>CBX5</i>           | -2.0782366 | -1.0553598 | 2.0782366 | down | chr11:63706467-63724444 (+) // 89.68 // q13.1   |
| 218734_at    | <i>NAA40</i>          | -2.0777872 | -1.0550479 | 2.0777872 | down | chr17:422275-424912 (-) // 80.33 // p13.3       |
| 235710_at    | <i>VPS53</i>          | -2.077533  | -1.0548714 | 2.077533  | down | chr20:60551223-60640866 (-) // 79.95 // q13.33  |
| 208545_x_at  | <i>MIR1257///TAF4</i> | -2.0763202 | -1.054029  | 2.0763202 | down | chr17:8191988-8193403 (+) // 98.69 // p13.1     |
| 223554_s_at  | <i>RANGRF</i>         | -2.076216  | -1.0539565 | 2.076216  | down | chr2:44502631-44547960 (+) // 99.82 // p21      |
| 205799_s_at  | <i>SLC3A1</i>         | -2.0761201 | -1.05389   | 2.0761201 | down | chr9:130670596-130678719 (-) // 99.9 // q34.11  |
| 221551_x_at  | <i>ST6GALNAC4</i>     | -2.0758386 | -1.0536942 | 2.0758386 | down |                                                 |

|              |                         |            |            |           |      |                                                  |
|--------------|-------------------------|------------|------------|-----------|------|--------------------------------------------------|
| 224752_at    | <i>C7orf73</i>          | -2.0756745 | -1.0535803 | 2.0756745 | down | chr7:135347240-135361160 (+) // 70.52 // q33     |
| 224921_at    | <i>SCAMP2</i>           | -2.075534  | -1.0534827 | 2.075534  | down | chr15:75136072-75137936 (-) // 98.41 // q24.1    |
| 201555_at    | <i>MCM3</i>             | -2.0753822 | -1.0533772 | 2.0753822 | down | chr6:52128817-52149507 (-) // 95.75 // p12.2     |
| 221848_at    | <i>ZGPAT</i>            | -2.075234  | -1.0532739 | 2.075234  | down | chr20:62339437-62367493 (+) // 95.39 // q13.33   |
| 209014_at    | <i>MAGED1</i>           | -2.0751643 | -1.0532256 | 2.0751643 | down | chrX:51636753-51645448 (+) // 93.95 // p11.22    |
| 207164_s_at  | <i>ZBTB18</i>           | -2.074186  | -1.0525453 | 2.074186  | down | chr1:244217097-244219193 (+) // 97.07 // q44     |
| 219924_s_at  | <i>ZMYM6</i>            | -2.0737803 | -1.0522623 | 2.0737803 | down | chr1:35449391-35496314 (-) // 99.16 // p34.3     |
| 203901_at    | <i>TAB1</i>             | -2.073779  | -1.0522623 | 2.073779  | down | chr22:39795787-39827781 (+) // 99.29 // q13.1    |
| 220172_at    | <i>DCAF17</i>           | -2.0734193 | -1.0520118 | 2.0734193 | down | chr2:172290726-172338668 (+) // 98.54 // q31.1   |
| 239928_at    | <i>TCTN2</i>            | -2.0731814 | -1.0518464 | 2.0731814 | down | chr12:124155712-124175238 (+) // 99.82 // q24.31 |
| 1554577_a_at | <i>PSMD10</i>           | -2.0730956 | -1.0517865 | 2.0730956 | down | chrX:107328059-107334772 (-) // 100.0 // q22.3   |
| 204263_s_at  | <i>CPT2</i>             | -2.072564  | -1.0514166 | 2.072564  | down | chr1:53662514-53679444 (+) // 94.41 // p32.3     |
| 223649_s_at  | <i>SLC25A39</i>         | -2.0725431 | -1.0514022 | 2.0725431 | down | chr17:42397347-42400943 (-) // 99.91 // q21.31   |
| 202710_at    | <i>BET1</i>             | -2.0723097 | -1.0512396 | 2.0723097 | down | chr7:93622562-93633583 (-) // 95.23 // q21.3     |
| 218795_at    | <i>ACP6</i>             | -2.0717778 | -1.0508692 | 2.0717778 | down | chr1:147119173-147142546 (-) // 98.79 // q21.2   |
| 201764_at    | <i>TMEM106C</i>         | -2.0717468 | -1.0508478 | 2.0717468 | down | chr12:48357990-48362660 (+) // 93.41 // q13.11   |
| 201746_at    | <i>TP53</i>             | -2.0716333 | -1.0507686 | 2.0716333 | down | chr17:7571738-7590917 (-) // 83.38 // p13.1      |
| 229662_at    |                         | -2.0710585 | -1.0503683 | 2.0710585 | down | chr5:79950293-79950493 (+) // 88.0 // q14.1      |
| 221250_s_at  | <i>MXD3</i>             | -2.0708702 | -1.0502372 | 2.0708702 | down | chr5:176734212-176738881 (-) // 95.51 // q35.3   |
| 201046_s_at  | <i>RAD23A</i>           | -2.0708392 | -1.0502155 | 2.0708392 | down | chr19:13056727-13064455 (+) // 98.25 // p13.2    |
| 224173_s_at  | <i>C2orf15///MRPL30</i> | -2.070293  | -1.049835  | 2.070293  | down | chr2:99797660-99813063 (+) // 57.63 // q11.2     |
| 226255_at    | <i>ZBTB33</i>           | -2.070151  | -1.0497361 | 2.070151  | down | chrX:119390110-119392252 (+) // 98.98 // q24     |
| 208371_s_at  | <i>RING1</i>            | -2.0701482 | -1.0497341 | 2.0701482 | down | chr6:33177336-33180490 (+) // 99.61 // p21.32    |
| 218511_s_at  | <i>PNPO</i>             | -2.06988   | -1.0495472 | 2.06988   | down | chr17:46018936-46025654 (+) // 76.75 // q21.32   |
| 221628_s_at  | <i>GLYR1</i>            | -2.0693755 | -1.0491954 | 2.0693755 | down | chr16:4855049-4897266 (-) // 99.62 // p13.3      |
| 202562_s_at  | <i>C14orf1</i>          | -2.0692039 | -1.0490758 | 2.0692039 | down | chr14:76117238-76127196 (-) // 82.84 // q24.3    |
| 219405_at    | <i>TRIM68</i>           | -2.0688114 | -1.0488021 | 2.0688114 | down | chr11:4619901-4623644 (-) // 87.65 // p15.4      |
| 212346_s_at  | <i>MIR4800///MXD4</i>   | -2.068802  | -1.0487957 | 2.068802  | down | chr4:2249158-2263749 (-) // 88.97 // p16.3       |



|              |                         |            |            |           |      |                                                  |
|--------------|-------------------------|------------|------------|-----------|------|--------------------------------------------------|
| 241866_at    | <i>SLC16A7</i>          | -2.0686946 | -1.0487207 | 2.0686946 | down | chr12:60175118-60175738 (+) // 95.3 // q14.1     |
| 1556551_s_at | <i>SLC39A6</i>          | -2.06824   | -1.0484036 | 2.06824   | down | chr18:33702020-33706678 (-) // 89.82 // q12.2    |
| 226134_s_at  | <i>MSI2</i>             | -2.067961  | -1.048209  | 2.067961  | down | chr17:55760948-55762048 (+) // 90.6 // q22       |
| 223286_at    | <i>ELP5</i>             | -2.0679178 | -1.0481789 | 2.0679178 | down | chr17:7155554-7163250 (+) // 96.15 // p13.1      |
| 203466_at    | <i>MPV17</i>            | -2.067547  | -1.0479202 | 2.067547  | down | chr2:27532361-27545392 (-) // 94.35 // p23.3     |
| 1559103_s_at | <i>OTTHUMG000001763</i> | -2.0673575 | -1.0477879 | 2.0673575 | down | chr4:113150716-113153052 (-) // 59.08 // q25     |
| 201284_s_at  | <i>APEH</i>             | -2.0669715 | -1.0475185 | 2.0669715 | down | chr3:49711816-49720931 (+) // 99.49 // p21.31    |
| 211205_x_at  | <i>PIP5K1A</i>          | -2.0669448 | -1.0474999 | 2.0669448 | down | chr1:151171070-151220447 (+) // 100.0 // q21.3   |
| 218405_at    | <i>ABT1</i>             | -2.0662553 | -1.0470185 | 2.0662553 | down | chr6:26597190-26599200 (+) // 99.91 // p22.2     |
| 223131_s_at  | <i>TRIM8</i>            | -2.0661972 | -1.046978  | 2.0661972 | down | chr10:104404348-104418164 (+) // 94.42 // q24.32 |
| 222397_at    | <i>EFTUD2</i>           | -2.0660079 | -1.0468458 | 2.0660079 | down | chr17:42927318-42976813 (-) // 95.08 // q21.31   |
| 223171_at    | <i>DYM</i>              | -2.065934  | -1.046794  | 2.065934  | down | chr18:46570173-46906085 (-) // 99.22 // q21.1    |
| 213966_at    | <i>HMG20B</i>           | -2.0657134 | -1.04664   | 2.0657134 | down | chr19:3573308-3575658 (-) // 85.53 // p13.3      |
| 201692_at    | <i>SIGMAR1</i>          | -2.0655048 | -1.0464944 | 2.0655048 | down | chr9:34634719-34637768 (-) // 97.76 // p13.3     |
| 1558947_at   |                         | -2.0654361 | -1.0464464 | 2.0654361 | down | chr15:41605083-41611980 (+) // 81.13 // q15.1    |
| 204477_at    | <i>RAB1F</i>            | -2.0653877 | -1.0464127 | 2.0653877 | down | chr1:202848088-202858229 (-) // 85.08 // q32.1   |
| 223214_s_at  | <i>ZHX1</i>             | -2.0652344 | -1.0463055 | 2.0652344 | down | chr8:124260982-124286490 (-) // 99.45 // q24.13  |
| 227925_at    | <i>ST3GAL4-AS1</i>      | -2.065062  | -1.0461851 | 2.065062  | down | chr11:126211435-126225474 (-) // 96.12 // q24.2  |
| 1555895_at   | <i>DNM2</i>             | -2.0650136 | -1.0461513 | 2.0650136 | down | chr19:10933899-10944448 (+) // 76.14 // p13.2    |
| 224791_at    | <i>ASAP1</i>            | -2.0648463 | -1.0460345 | 2.0648463 | down | chr8:131064352-131193108 (-) // 98.11 // q24.21  |
| 228272_at    | <i>DNLZ</i>             | -2.0641875 | -1.0455741 | 2.0641875 | down | chr9:139256354-139258491 (-) // 92.91 // q34.3   |
| 201584_s_at  | <i>DDX39A</i>           | -2.0639226 | -1.0453888 | 2.0639226 | down | chr19:14519626-14530171 (-) // 98.48 // p13.12   |
| 1555741_at   | <i>MRAP</i>             | -2.0635786 | -1.0451484 | 2.0635786 | down | chr21:33671282-33687092 (+) // 93.18 // q22.11   |
| 211934_x_at  | <i>GANAB</i>            | -2.0633297 | -1.0449744 | 2.0633297 | down | chr11:62392300-62414088 (-) // 99.12 // q12.3    |
| 212535_at    | <i>MEF2A</i>            | -2.0630302 | -1.044765  | 2.0630302 | down | chr15:100254887-100256688 (+) // 98.68 // q26.3  |
| 201015_s_at  | <i>JUP</i>              | -2.0628295 | -1.0446246 | 2.0628295 | down | chr17:39910863-39928117 (-) // 96.55 // q21.2    |
| 204577_s_at  | <i>CLUAP1</i>           | -2.062555  | -1.0444326 | 2.062555  | down | chr16:3565505-3587669 (+) // 82.62 // p13.3      |
| 206855_s_at  | <i>HYAL2</i>            | -2.0621471 | -1.0441473 | 2.0621471 | down | chr3:50355239-50360142 (-) // 98.81 // p21.31    |

|              |                      |            |            |           |      |                                                                                                  |
|--------------|----------------------|------------|------------|-----------|------|--------------------------------------------------------------------------------------------------|
| 1554761_a_at | <i>HEATR2</i>        | -2.062078  | -1.044099  | 2.062078  | down | chr7:796424-819781 (+) // 88.51 // p22.3                                                         |
| 224670_at    | <i>SYS1</i>          | -2.0617843 | -1.0438933 | 2.0617843 | down | chr20:43991700-43997775 (+) // 87.48 // q13.12                                                   |
| 212866_at    | <i>R3HCC1</i>        | -2.0609422 | -1.043304  | 2.0609422 | down | chr8:23145622-23153792 (+) // 92.01 // p21.3                                                     |
| 202950_at    | <i>CRYZ</i>          | -2.0607393 | -1.043162  | 2.0607393 | down | chr1:75171183-75190515 (-) // 99.94 // p31.1                                                     |
| 220937_s_at  | <i>ST6GALNAC4</i>    | -2.0605848 | -1.0430537 | 2.0605848 | down | chr9:130670380-130678747 (-) // 99.31 // q34.11                                                  |
| 1555426_a_at | <i>OTUD5</i>         | -2.0603583 | -1.0428952 | 2.0603583 | down | chrX:48779488-48814845 (-) // 90.32 // p11.23                                                    |
| 202982_s_at  | <i>ACOT1///ACOT2</i> | -2.0599384 | -1.0426012 | 2.0599384 | down | chr14:74035988-74042357 (+) // 98.6 // q24.3                                                     |
| 203829_at    | <i>ELP4</i>          | -2.05912   | -1.0420278 | 2.05912   | down | chr11:31531296-31805327 (+) // 97.29 // p13                                                      |
| 202945_at    | <i>FPGS</i>          | -2.0585341 | -1.0416174 | 2.0585341 | down | chr9:130565259-130576333 (+) // 100.0 // q34.11                                                  |
| 201717_at    | <i>MRPL49</i>        | -2.0583577 | -1.0414937 | 2.0583577 | down | chr11:64889805-64894822 (+) // 80.18 // q13.1                                                    |
| 201700_at    | <i>CCND3</i>         | -2.0579584 | -1.0412138 | 2.0579584 | down | chr6:41902679-41909552 (-) // 97.01 // p21.1                                                     |
| 44065_at     | <i>C12orf52</i>      | -2.0577583 | -1.0410736 | 2.0577583 | down | chr12:113629368-113630171 (+) // 89.46 // q24.13                                                 |
|              |                      |            |            |           |      | chrX:133300698-133301109 (+) // 93.62 // q26.2///chr11:111955871-111957459 (-) // 97.16 // q23.1 |
| 218357_s_at  | <i>TIMM8B</i>        | -2.057595  | -1.040959  | 2.057595  | down | chrX:135310837-135323438 (-) // 82.74 // q26.3                                                   |
| 219576_at    | <i>MAP7D3</i>        | -2.0575886 | -1.0409546 | 2.0575886 | down | chrX:70338261-70362298 (+) // 96.53 // q13.1                                                     |
| 216071_x_at  | <i>MED12</i>         | -2.0573199 | -1.0407661 | 2.0573199 | down | chr6:135503765-135516060 (+) // 99.65 // q23.3                                                   |
| 215152_at    | <i>MYB</i>           | -2.056843  | -1.0404317 | 2.056843  | down | chr19:39423191-39423660 (-) // 73.0 // q13.2                                                     |
| 213840_s_at  | <i>MRPS12</i>        | -2.056512  | -1.0401995 | 2.056512  | down | chr6:90346991-90348435 (-) // 100.0 // q15                                                       |
| 221311_x_at  | <i>LYRM2</i>         | -2.0564315 | -1.040143  | 2.0564315 | down | chr1:1334931-1342669 (+) // 94.95 // p36.33                                                      |
| 225934_at    |                      | -2.056353  | -1.040088  | 2.056353  | down | chr19:56915717-56936400 (+) // 76.54 // q13.43                                                   |
| 1553221_at   | <i>ZNF583</i>        | -2.0558565 | -1.0397395 | 2.0558565 | down | chr11:76253282-76263021 (+) // 93.65 // q13.5                                                    |
| 222806_s_at  | <i>C11orf30</i>      | -2.0556364 | -1.0395851 | 2.0556364 | down | chr3:33482503-33482990 (+) // 96.06 // p22.3                                                     |
| 243859_at    |                      | -2.0555851 | -1.0395491 | 2.0555851 | down | chr9:130922611-130926203 (+) // 92.85 // q34.11                                                  |
| 41047_at     | <i>C9orf16</i>       | -2.0555294 | -1.03951   | 2.0555294 | down | chr19:17688245-17693968 (+) // 68.85 // p13.11                                                   |
| 222644_s_at  | <i>COLGALT1</i>      | -2.0552351 | -1.0393035 | 2.0552351 | down | chr20:44520205-44527456 (+) // 97.41 // q13.12                                                   |
| 200661_at    | <i>CTSA</i>          | -2.0550494 | -1.0391731 | 2.0550494 | down | chr19:45912871-45927173 (-) // 99.91 // q13.32                                                   |
| 203720_s_at  | <i>ERCC1</i>         | -2.0550318 | -1.0391607 | 2.0550318 | down | chr10:23384522-23409899 (+) // 88.22 // p12.2                                                    |
| 218773_s_at  | <i>MSRB2</i>         | -2.0543478 | -1.0386804 | 2.0543478 | down |                                                                                                  |

|             |                         |            |            |           |      |                                                  |
|-------------|-------------------------|------------|------------|-----------|------|--------------------------------------------------|
| 215616_s_at | <i>KDM4B</i>            | -2.0542433 | -1.038607  | 2.0542433 | down | chr19:5082428-5153057 (+) // 94.3 // p13.3       |
| 227914_s_at | <i>UBE3B</i>            | -2.053842  | -1.0383253 | 2.053842  | down | chr12:109972459-109973074 (-) // 99.84 // q24.11 |
| 224632_at   | <i>GPATCH4</i>          | -2.0532281 | -1.037894  | 2.0532281 | down | chr1:156561575-156571302 (-) // 95.75 // q23.1   |
| 208874_x_at | <i>PPP2R4</i>           | -2.0529735 | -1.0377151 | 2.0529735 | down | chr9:131873243-131911223 (+) // 97.53 // q34.11  |
| 204923_at   | <i>SASH3</i>            | -2.0523195 | -1.0372554 | 2.0523195 | down | chrX:128913919-128929174 (+) // 93.5 // q26.1    |
| 56821_at    | <i>SLC38A7</i>          | -2.0519836 | -1.0370193 | 2.0519836 | down | chr16:58700297-58700945 (-) // 85.52 // q21      |
| 44654_at    | <i>G6PC3</i>            | -2.0515804 | -1.0367358 | 2.0515804 | down | chr17:42152349-42153712 (+) // 94.89 // q21.31   |
| 225003_at   | <i>TMEM205</i>          | -2.0512545 | -1.0365065 | 2.0512545 | down | chr19:11453453-11456965 (-) // 95.82 // p13.2    |
| 227054_at   | <i>N6AMT2</i>           | -2.0506263 | -1.0360646 | 2.0506263 | down | chr13:21303069-21331757 (-) // 86.17 // q12.11   |
| 216980_s_at | <i>SPN</i>              | -2.0504007 | -1.0359058 | 2.0504007 | down | chr16:29674299-29676837 (-) // 84.46 // p11.2    |
| 204552_at   | <i>INPP4A</i>           | -2.0501828 | -1.0357525 | 2.0501828 | down | chr2:99061348-99206446 (+) // 97.2 // q11.2      |
| 210115_at   | <i>RPL39L</i>           | -2.050178  | -1.0357492 | 2.050178  | down | chr3:186838740-186857209 (-) // 100.0 // q27.3   |
| 225030_at   | <i>BOD1</i>             | -2.0495427 | -1.035302  | 2.0495427 | down | chr5:173034536-173043656 (-) // 88.28 // q35.2   |
| 203489_at   | <i>SIVA1</i>            | -2.049357  | -1.0351713 | 2.049357  | down | chr14:105219501-105225990 (+) // 97.6 // q32.33  |
| 219004_s_at | <i>MIS18A</i>           | -2.0490358 | -1.0349452 | 2.0490358 | down | chr21:33641262-33651348 (-) // 96.79 // q22.11   |
| 210967_x_at | <i>CACNB1</i>           | -2.0483809 | -1.0344839 | 2.0483809 | down | chr17:37333389-37353901 (-) // 98.41 // q12      |
| 217987_at   | <i>ASNSD1</i>           | -2.0483685 | -1.0344753 | 2.0483685 | down | chr2:190526145-190535555 (+) // 98.45 // q32.2   |
| 212020_s_at | <i>MKI67</i>            | -2.0483427 | -1.0344571 | 2.0483427 | down | chr10:129894926-129924649 (-) // 98.21 // q26.2  |
| 225403_at   | <i>RPP25L</i>           | -2.048171  | -1.0343362 | 2.048171  | down | chr9:34610492-34612053 (-) // 92.93 // p13.3     |
| 223186_at   | <i>TMEM189///TMEM18</i> | -2.0478656 | -1.034121  | 2.0478656 | down | chr20:48740706-48770247 (-) // 98.61 // q13.13   |
| 221440_s_at | <i>RBBP9</i>            | -2.0477865 | -1.0340652 | 2.0477865 | down | chr20:18470445-18477799 (-) // 89.85 // p11.23   |
| 224920_x_at | <i>MYADM</i>            | -2.047422  | -1.0338085 | 2.047422  | down | chr19:54371148-54378955 (+) // 78.95 // q13.42   |
| 213550_s_at | <i>IK///TMCO6</i>       | -2.0471103 | -1.0335889 | 2.0471103 | down | chr5:140024947-140027195 (+) // 100.0 // q31.3   |
| 228828_at   | <i>BZRAP1-AS1</i>       | -2.0465906 | -1.0332224 | 2.0465906 | down | chr17:56414635-56431080 (+) // 89.19 // q22      |
| 210471_s_at | <i>KCNAB1</i>           | -2.04559   | -1.032517  | 2.04559   | down | chr3:156009669-156255923 (+) // 98.93 // q25.31  |
| 242122_at   |                         | -2.0453548 | -1.0323511 | 2.0453548 | down | chr19:7083515-7084072 (-) // 53.85 // p13.2      |
| 203418_at   | <i>CCNA2</i>            | -2.0446188 | -1.031832  | 2.0446188 | down | chr4:122738553-122744880 (-) // 99.03 // q27     |
| 211941_s_at | <i>PEBP1</i>            | -2.044609  | -1.031825  | 2.044609  | down | chr12:118573847-118583389 (+) // 96.63 // q24.23 |

|              |                     |            |            |           |      |                                                |
|--------------|---------------------|------------|------------|-----------|------|------------------------------------------------|
| 208892_s_at  | <i>DUSP6</i>        | -2.044471  | -1.0317276 | 2.044471  | down | chr12:89741838-89746164 (-) // 99.0 // q21.33  |
| 227112_at    | <i>TMCC1</i>        | -2.0437574 | -1.031224  | 2.0437574 | down | chr3:129366636-129367499 (-) // 95.52 // q22.1 |
| 218762_at    | <i>ZNF574</i>       | -2.043055  | -1.0307281 | 2.043055  | down | chr19:42583481-42585700 (+) // 99.19 // q13.2  |
| 201310_s_at  | <i>NREP</i>         | -2.0430138 | -1.0306989 | 2.0430138 | down | chr5:111064992-111092932 (-) // 97.25 // q22.1 |
| 229758_at    | <i>TIGD5</i>        | -2.04295   | -1.0306538 | 2.04295   | down | chr8:144681771-144682484 (+) // 97.8 // q24.3  |
| 212109_at    | <i>HN1L</i>         | -2.0427601 | -1.0305198 | 2.0427601 | down | chr16:1728297-1752080 (+) // 89.56 // p13.3    |
| 223057_s_at  | <i>XPO5</i>         | -2.0425057 | -1.0303401 | 2.0425057 | down | chr6:43490634-43514359 (-) // 99.01 // p21.1   |
| 235282_at    | <i>LOC100506295</i> | -2.042382  | -1.0302527 | 2.042382  | down | chr17:45968597-45973146 (-) // 57.49 // q21.32 |
| 227741_at    | <i>PTPLB</i>        | -2.0422976 | -1.0301931 | 2.0422976 | down | chr3:123212094-123303868 (-) // 75.46 // q21.1 |
| 224330_s_at  | <i>MRPL27</i>       | -2.042295  | -1.0301912 | 2.042295  | down | chr17:48445251-48450537 (-) // 100.0 // q21.33 |
| 215459_at    | <i>CTNS</i>         | -2.0414402 | -1.0295874 | 2.0414402 | down | chr17:3566340-3571872 (+) // 99.67 // p13.2    |
| 1553644_at   | <i>SYNE3</i>        | -2.041172  | -1.0293978 | 2.041172  | down | chr14:95883830-95918635 (-) // 97.35 // q32.13 |
| 226053_at    | <i>MAP2K7</i>       | -2.0410626 | -1.0293205 | 2.0410626 | down | chr19:7977482-7979363 (+) // 82.55 // p13.2    |
| 1563542_a_at | <i>SCML4</i>        | -2.0410008 | -1.0292768 | 2.0410008 | down | chr6:108040158-108145516 (-) // 61.3 // q21    |
| 230376_at    | <i>GTF2A2</i>       | -2.0409782 | -1.0292608 | 2.0409782 | down | chr15:59930260-59930808 (-) // 75.27 // q22.2  |
| 201251_at    | <i>PKM</i>          | -2.040801  | -1.0291356 | 2.040801  | down | chr15:72491412-72523551 (-) // 99.69 // q23    |
| 227158_at    | <i>DTD2</i>         | -2.0404172 | -1.0288641 | 2.0404172 | down | chr14:31915244-31917196 (-) // 58.5 // q12     |
| 202601_s_at  | <i>HTATSF1</i>      | -2.0404134 | -1.0288614 | 2.0404134 | down | chrX:135579689-135594505 (+) // 97.06 // q26.3 |
| 202329_at    | <i>CSK</i>          | -2.0397546 | -1.0283957 | 2.0397546 | down | chr15:75074714-75095504 (+) // 99.67 // q24.1  |
| 1555384_a_at | <i>LARP4</i>        | -2.038759  | -1.0276912 | 2.038759  | down | chr12:50794689-50869745 (+) // 98.48 // q13.12 |
| 225352_at    | <i>SEC62</i>        | -2.0383356 | -1.0273916 | 2.0383356 | down | chr3:169711986-169714250 (+) // 72.75 // q26.2 |
| 221418_s_at  | <i>MED16</i>        | -2.038199  | -1.0272949 | 2.038199  | down | chr19:868100-891131 (-) // 99.77 // p13.3      |
| 201095_at    | <i>DAP</i>          | -2.0381665 | -1.027272  | 2.0381665 | down | chr5:10679405-10761339 (-) // 98.43 // p15.2   |
| 224909_s_at  | <i>PREX1</i>        | -2.0372658 | -1.0266342 | 2.0372658 | down | chr20:47240786-47444285 (-) // 98.53 // q13.13 |
| 211453_s_at  | <i>AKT2</i>         | -2.0364509 | -1.026057  | 2.0364509 | down | chr19:40739794-40791194 (-) // 86.59 // q13.2  |
| 225797_at    | <i>MRPL54</i>       | -2.0363317 | -1.0259726 | 2.0363317 | down | chr19:3762664-3767631 (+) // 91.74 // p13.3    |
| 222993_at    | <i>MRPL37</i>       | -2.034923  | -1.0249742 | 2.034923  | down | chr1:54665891-54684049 (+) // 99.3 // p32.3    |
| 219041_s_at  | <i>REPIN1</i>       | -2.0339777 | -1.0243039 | 2.0339777 | down | chr7:150068257-150071126 (+) // 89.68 // q36.1 |

|              |                  |            |            |           |      |                                                  |
|--------------|------------------|------------|------------|-----------|------|--------------------------------------------------|
| 213402_at    | <i>ZNF787</i>    | -2.0336332 | -1.0240595 | 2.0336332 | down | chr19:56598731-56632642 (-) // 87.37 // q13.43   |
| 229269_x_at  | <i>SSBP4</i>     | -2.0332038 | -1.0237548 | 2.0332038 | down | chr19:18544051-18545372 (+) // 92.19 // p13.11   |
| 229106_at    | <i>DYNLL2</i>    | -2.0331113 | -1.0236893 | 2.0331113 | down | chr17:56164195-56168306 (+) // 88.67 // q22      |
| 230564_at    | <i>SIPA1L3</i>   | -2.0330584 | -1.0236516 | 2.0330584 | down | chr19:38573267-38579419 (-) // 100.0 // q13.13   |
| 222002_at    | <i>C7orf26</i>   | -2.0323322 | -1.0231363 | 2.0323322 | down | chr7:6629903-6639849 (-) // 98.58 // p22.1       |
| 200987_x_at  | <i>PSME3</i>     | -2.0320327 | -1.0229236 | 2.0320327 | down | chr17:40985415-40995777 (+) // 95.3 // q21.31    |
| 205716_at    | <i>SLC25A40</i>  | -2.031309  | -1.0224097 | 2.031309  | down | chr7:87465425-87505669 (-) // 95.65 // q21.12    |
|              |                  |            |            |           |      | chr22:21475771-21477299 (+) // 98.01 //          |
|              |                  |            |            |           |      | q11.21///chr22:23659420-23660948 (+) // 98.1 //  |
|              |                  |            |            |           |      | q11.23///chr22:22980348-22981879 (+) // 97.06 // |
|              |                  |            |            |           |      | q11.22///chr22:25048523-25050054 (+) // 97.15 // |
|              |                  |            |            |           |      | q11.23///chr20:23974480-23976008 (-) // 96.97 // |
|              |                  |            |            |           |      | p11.21///chr22:18839072-18840600 (-) // 98.27 // |
|              |                  |            |            |           |      | q11.21///chr22:21641793-21643321 (-) // 98.27 // |
|              |                  |            |            |           |      | q11.21///chr22:24652640-24654172 (-) // 97.58 // |
|              |                  |            |            |           |      | q11.23///chr22:21049001-21050530 (-) // 97.06 // |
|              |                  |            |            |           |      | q11.21                                           |
| 226602_s_at  | <i>BCR</i>       | -2.0312243 | -1.0223495 | 2.0312243 | down | chr11:65651398-65655900 (-) // 99.3 // q13.1     |
| 202041_s_at  | <i>FIBP</i>      | -2.0312064 | -1.0223368 | 2.0312064 | down | chr16:1495343-1525013 (-) // 98.23 // p13.3      |
| 209235_at    | <i>CLCN7</i>     | -2.0311959 | -1.0223294 | 2.0311959 | down | chr3:183173419-183173798 (+) // 90.67 // q27.1   |
| 236798_at    | <i>LINC00888</i> | -2.0311773 | -1.0223161 | 2.0311773 | down | chr17:4442200-4458207 (-) // 97.49 // p13.2      |
| 233803_s_at  | <i>MYBBP1A</i>   | -2.0309    | -1.0221193 | 2.0309    | down | chr12:28342476-28346191 (-) // 74.79 // p11.22   |
| 1570572_at   | <i>LOC729291</i> | -2.0306752 | -1.0219594 | 2.0306752 | down | chr20:60768470-60777808 (+) // 84.7 // q13.33    |
| 226606_s_at  | <i>MTG2</i>      | -2.0305982 | -1.0219048 | 2.0305982 | down | chr4:129191298-129208948 (-) // 88.63 // q28.2   |
| 201701_s_at  | <i>PGRMC2</i>    | -2.0305142 | -1.0218452 | 2.0305142 | down | chr19:36606706-36616684 (+) // 99.09 // q13.12   |
| 216194_s_at  | <i>TBCB</i>      | -2.03037   | -1.0217426 | 2.03037   | down | chr17:15607392-15607638 (+) // 96.81 //          |
|              |                  |            |            |           |      | p12///chr19:55912649-55912896 (+) // 97.61 //    |
|              |                  |            |            |           |      | q13.42///chr17:18580979-18581225 (-) // 96.02 // |
|              |                  |            |            |           |      | p11.2                                            |
| 230714_s_at  |                  | -2.0302563 | -1.0216619 | 2.0302563 | down | chrX:54208932-54209658 (-) // 68.2 // p11.22     |
| 220685_at    | <i>FAM120C</i>   | -2.0301645 | -1.0215967 | 2.0301645 | down | chr11:64088145-64089282 (+) // 47.69 // q13.1    |
| 1560587_s_at | <i>PRDX5</i>     | -2.029584  | -1.0211841 | 2.029584  | down | chr6:26402581-26411819 (+) // 92.64 // p22.2     |
| 207485_x_at  | <i>BTN3A1</i>    | -2.0293493 | -1.0210172 | 2.0293493 | down |                                                  |

|              |                           |            |            |           |      |                                                  |
|--------------|---------------------------|------------|------------|-----------|------|--------------------------------------------------|
| 222052_at    | <i>C19orf54</i>           | -2.029334  | -1.0210063 | 2.029334  | down | chr19:41246765-41247572 (-) // 46.81 // q13.2    |
| 225712_at    | <i>GEMIN5</i>             | -2.0292246 | -1.0209286 | 2.0292246 | down | chr5:154266872-154317746 (-) // 97.42 // q33.2   |
| 218531_at    | <i>TMEM134</i>            | -2.028941  | -1.0207269 | 2.028941  | down | chr11:67231829-67236743 (-) // 90.11 // q13.2    |
| 223063_at    | <i>C1orf198</i>           | -2.0289094 | -1.0207045 | 2.0289094 | down | chr1:230972865-230975381 (-) // 98.47 // q42.2   |
| 225374_at    | <i>MIR4723///TMEM199</i>  | -2.0286467 | -1.0205176 | 2.0286467 | down | chr17:26684669-26689369 (+) // 99.15 // q11.2    |
| 211742_s_at  | <i>EVI2B</i>              | -2.0285773 | -1.0204682 | 2.0285773 | down | chr17:29630792-29641091 (-) // 98.34 // q11.2    |
| 200654_at    | <i>P4HB</i>               | -2.028419  | -1.0203557 | 2.028419  | down | chr17:79801036-79818410 (-) // 96.54 // q25.3    |
| 219490_s_at  | <i>DCLRE1B</i>            | -2.0283144 | -1.0202813 | 2.0283144 | down | chr1:114447996-114455095 (+) // 98.18 // p13.2   |
| 213658_at    |                           | -2.0282    | -1.0201999 | 2.0282    | down | chr15:90617746-90619885 (-) // 29.03 // q26.1    |
| 221937_at    | <i>SYNRG</i>              | -2.0279498 | -1.0200219 | 2.0279498 | down | chr17:35875012-35876457 (-) // 74.52 // q12      |
| 222663_at    | <i>RIOK2</i>              | -2.0278187 | -1.0199287 | 2.0278187 | down | chr5:96496571-96518951 (-) // 91.5 // q15        |
| 209605_at    | <i>TST</i>                | -2.0272563 | -1.0195285 | 2.0272563 | down | chr22:37406905-37414794 (-) // 94.72 // q12.3    |
| 201708_s_at  | <i>NIPSNAP1</i>           | -2.0271192 | -1.0194309 | 2.0271192 | down | chr22:29950796-29977328 (-) // 94.38 // q12.2    |
| 207855_s_at  | <i>CLCC1</i>              | -2.0268648 | -1.0192499 | 2.0268648 | down | chr1:109474607-109506079 (-) // 82.83 // p13.3   |
| 228597_at    | <i>MIS18A</i>             | -2.0260887 | -1.0186974 | 2.0260887 | down | chr21:33640537-33641298 (-) // 54.97 // q22.11   |
| 206553_at    | <i>OAS2</i>               | -2.026026  | -1.0186527 | 2.026026  | down | chr12:113416394-113448061 (+) // 89.73 // q24.13 |
| 225435_at    | <i>SSR1</i>               | -2.0257952 | -1.0184884 | 2.0257952 | down | chr6:7281286-7283503 (-) // 90.13 // p24.3       |
| 242835_s_at  | <i>LOC728730</i>          | -2.0252562 | -1.0181044 | 2.0252562 | down | chr2:39743585-39745852 (+) // 41.02 // p22.1     |
| 211635_x_at  | <i>IGHA1///IGHA2///IG</i> | -2.0250738 | -1.0179744 | 2.0250738 | down | chr14:106330425-107170377 (-) // 90.53 // q32.33 |
| 221807_s_at  | <i>TRABD</i>              | -2.0250394 | -1.01795   | 2.0250394 | down | chr22:50624361-50638295 (+) // 97.55 // q13.33   |
| 226230_at    | <i>SMEK2</i>              | -2.0248845 | -1.0178396 | 2.0248845 | down | chr2:55774428-55813824 (-) // 92.77 // p16.1     |
| 1554696_s_at | <i>TYMS</i>               | -2.0248027 | -1.0177813 | 2.0248027 | down | chr18:657742-672997 (+) // 97.39 // p11.32       |
| 209083_at    | <i>CORO1A</i>             | -2.0244946 | -1.0175619 | 2.0244946 | down | chr16:30194955-30200396 (+) // 96.98 // p11.2    |
| 35436_at     | <i>GOLGA2</i>             | -2.0240302 | -1.0172309 | 2.0240302 | down | chr9:131019083-131023535 (-) // 66.6 // q34.11   |
| 207431_s_at  | <i>DEGS1</i>              | -2.023692  | -1.0169897 | 2.023692  | down | chr1:224370967-224380861 (+) // 83.42 // q42.11  |
| 211284_s_at  | <i>GRN</i>                | -2.023547  | -1.0168862 | 2.023547  | down | chr17:42422488-42430470 (+) // 98.66 // q21.31   |
| 1555736_a_at | <i>AGTRAP</i>             | -2.0226595 | -1.0162535 | 2.0226595 | down | chr1:11796265-11810249 (+) // 99.58 // p36.22    |
| 241480_at    | <i>RNF213</i>             | -2.0226188 | -1.0162244 | 2.0226188 | down | chr17:78313724-78316961 (+) // 100.0 // q25.3    |

|              |                 |            |            |           |      |                                                 |
|--------------|-----------------|------------|------------|-----------|------|-------------------------------------------------|
| 226101_at    | <i>PRKCE</i>    | -2.0219545 | -1.0157505 | 2.0219545 | down | chr2:46413100-46415128 (+) // 97.36 // p21      |
| 226491_x_at  | <i>PTBP1</i>    | -2.021905  | -1.0157152 | 2.021905  | down | chr19:811289-812316 (-) // 96.92 // p13.3       |
| 216969_s_at  | <i>KIF22</i>    | -2.0212338 | -1.0152361 | 2.0212338 | down | chr16:29802056-29810116 (+) // 100.0 // p11.2   |
| 1553246_a_at | <i>SGK196</i>   | -2.0211813 | -1.0151987 | 2.0211813 | down | chr8:42948660-42978323 (+) // 82.72 // p11.21   |
| 242412_at    |                 | -2.020879  | -1.0149829 | 2.020879  | down | chr22:22757400-22763223 (-) // 93.06 // q11.22  |
| 209001_s_at  | <i>ANAPC13</i>  | -2.020822  | -1.0149423 | 2.020822  | down | chr3:134196549-134204829 (-) // 97.34 // q22.2  |
| 229100_s_at  | <i>TIMM22</i>   | -2.0203378 | -1.0145966 | 2.0203378 | down | chr17:904837-905430 (+) // 95.09 // p13.3       |
| 209575_at    | <i>IL10RB</i>   | -2.0203116 | -1.0145779 | 2.0203116 | down | chr21:34638685-34669258 (+) // 81.72 // q22.11  |
| 235491_at    | <i>ZBTB10</i>   | -2.0201569 | -1.0144672 | 2.0201569 | down | chr8:81399463-81400015 (-) // 73.69 // q21.13   |
| 221779_at    | <i>MICALL1</i>  | -2.0201292 | -1.0144476 | 2.0201292 | down | chr22:38301663-39044565 (+) // 81.31 // q13.1   |
| 238022_at    | <i>CRNDE</i>    | -2.0198994 | -1.0142834 | 2.0198994 | down | chr16:54952778-54962690 (-) // 97.39 // q12.2   |
| 221287_at    | <i>RNASEL</i>   | -2.0195544 | -1.014037  | 2.0195544 | down | chr1:182544526-182555941 (-) // 98.34 // q25.3  |
| 230261_at    | <i>ST8SIA4</i>  | -2.019434  | -1.013951  | 2.019434  | down | chr5:100145359-100145856 (-) // 96.5 // q21.1   |
| 206968_s_at  | <i>NFRKB</i>    | -2.0193307 | -1.0138773 | 2.0193307 | down | chr11:129734598-129765452 (-) // 74.66 // q24.3 |
| 222787_s_at  | <i>TMEM106B</i> | -2.0192773 | -1.0138391 | 2.0192773 | down | chr7:12250923-12273303 (+) // 98.02 // p21.3    |
| 215037_s_at  | <i>BCL2L1</i>   | -2.018738  | -1.0134537 | 2.018738  | down | chr20:30309337-30310825 (-) // 99.67 // q11.21  |
| 1554077_a_at | <i>TMEM53</i>   | -2.018731  | -1.0134487 | 2.018731  | down | chr1:45120175-45140133 (-) // 84.3 // p34.1     |
| 1556480_a_at |                 | -2.018372  | -1.0131922 | 2.018372  | down | chr18:13471010-13472717 (+) // 93.3 // p11.21   |
| 217973_at    | <i>DCXR</i>     | -2.0178688 | -1.0128323 | 2.0178688 | down | chr17:79993757-79995561 (-) // 96.23 // q25.3   |
| 227549_x_at  | <i>ZDHHC24</i>  | -2.0178118 | -1.0127916 | 2.0178118 | down | chr11:66305818-66307898 (-) // 66.46 // q13.2   |
| 223206_s_at  | <i>NMRAL1</i>   | -2.0177839 | -1.0127716 | 2.0177839 | down | chr16:4511695-4524533 (-) // 97.52 // p13.3     |
| 212968_at    | <i>RFNG</i>     | -2.0175402 | -1.0125974 | 2.0175402 | down | chr17:80005782-80009650 (-) // 71.47 // q25.3   |
| 201609_x_at  | <i>ICMT</i>     | -2.0174031 | -1.0124995 | 2.0174031 | down | chr1:6279862-6296022 (-) // 86.25 // p36.31     |
| 213349_at    | <i>TMCC1</i>    | -2.0168066 | -1.0120728 | 2.0168066 | down | chr3:129367543-129389684 (-) // 99.12 // q22.1  |
| 225818_s_at  | <i>TBRG1</i>    | -2.0166864 | -1.0119867 | 2.0166864 | down | chr11:124492773-124502634 (+) // 88.81 // q24.2 |
| 218535_s_at  | <i>RIOK2</i>    | -2.0161417 | -1.011597  | 2.0161417 | down | chr5:96498640-96518944 (-) // 99.78 // q15      |
| 225420_at    | <i>GPAM</i>     | -2.0153623 | -1.0110393 | 2.0153623 | down | chr10:113909623-113933518 (-) // 90.76 // q25.2 |
| 219594_at    | <i>NINJ2</i>    | -2.014829  | -1.0106573 | 2.014829  | down | chr12:673462-772582 (-) // 97.79 // p13.33      |

|             |                 |            |            |           |      |                                                  |
|-------------|-----------------|------------|------------|-----------|------|--------------------------------------------------|
| 230285_at   | <i>SVIP</i>     | -2.0147696 | -1.0106148 | 2.0147696 | down | chr11:22842339-22843333 (-) // 90.76 // p14.3    |
| 205480_s_at | <i>UGP2</i>     | -2.0144186 | -1.0103636 | 2.0144186 | down | chr2:64069235-64118585 (+) // 98.74 // p15       |
| 237686_at   | <i>RNF219</i>   | -2.0141523 | -1.0101727 | 2.0141523 | down | chr13:79232975-79233426 (+) // 94.95 // q31.1    |
| 203800_s_at | <i>MRPS14</i>   | -2.0132253 | -1.0095087 | 2.0132253 | down | chr1:174981719-174992554 (-) // 59.42 // q25.1   |
| 202758_s_at | <i>RFXANK</i>   | -2.012895  | -1.009272  | 2.012895  | down | chr19:19303095-19312673 (+) // 100.0 // p13.11   |
| 233852_at   | <i>POLH</i>     | -2.01252   | -1.0090032 | 2.01252   | down | chr6:43555103-43584542 (+) // 77.02 // p21.1     |
| 229173_at   | <i>KIAA1715</i> | -2.0124388 | -1.0089449 | 2.0124388 | down | chr2:176788590-176789724 (-) // 66.52 // q31.1   |
| 225772_s_at | <i>COX14</i>    | -2.012384  | -1.0089056 | 2.012384  | down | chr12:50505816-50514234 (+) // 87.35 // q13.12   |
| 224860_at   | <i>C9orf123</i> | -2.0123765 | -1.0089003 | 2.0123765 | down | chr9:7796496-7799790 (-) // 67.26 // p24.1       |
| 228015_s_at | <i>TRIM8</i>    | -2.0123713 | -1.0088965 | 2.0123713 | down | chr10:104416854-104417344 (-) // 88.98 // q24.32 |
| 218246_at   | <i>MUL1</i>     | -2.0122342 | -1.0087982 | 2.0122342 | down | chr1:20825942-20834654 (-) // 99.55 // p36.12    |
| 217838_s_at | <i>EVL</i>      | -2.0120502 | -1.0086663 | 2.0120502 | down | chr14:100531783-100610572 (+) // 96.51 // q32.2  |
| 208553_at   | <i>HIST1H1E</i> | -2.0109026 | -1.0078433 | 2.0109026 | down | chr6:26156618-26157278 (+) // 99.85 // p22.2     |
| 202502_at   | <i>ACADM</i>    | -2.010829  | -1.0077904 | 2.010829  | down | chr1:76189082-76229183 (+) // 94.01 // p31.1     |
| 225669_at   | <i>IFNAR1</i>   | -2.0106373 | -1.0076529 | 2.0106373 | down | chr21:34729872-34732129 (+) // 64.53 // q22.11   |
| 217775_s_at | <i>RDH11</i>    | -2.0104833 | -1.0075424 | 2.0104833 | down | chr14:68144106-68162460 (-) // 95.59 // q24.1    |
| 219184_x_at | <i>TIMM22</i>   | -2.0104725 | -1.0075346 | 2.0104725 | down | chr17:900377-905388 (+) // 97.78 // p13.3        |
| 242497_at   | <i>TRAFD1</i>   | -2.010471  | -1.0075336 | 2.010471  | down | chr12:112590617-112591184 (-) // 99.47 // q24.13 |
| 238445_x_at | <i>MGAT5B</i>   | -2.0103517 | -1.0074478 | 2.0103517 | down | chr17:74945398-74946471 (+) // 92.95 // q25.2    |
| 203363_s_at | <i>ATG13</i>    | -2.010221  | -1.0073541 | 2.010221  | down | chr11:46639102-46696367 (+) // 99.68 // p11.2    |
| 230610_at   |                 | -2.0098052 | -1.0070556 | 2.0098052 | down | chr1:109480201-109480821 (+) // 53.46 // p13.3   |
| 55081_at    | <i>MICALL1</i>  | -2.0092647 | -1.0066676 | 2.0092647 | down | chr22:38336937-38338016 (+) // 95.9 // q13.1     |
| 202451_at   | <i>GTF2H1</i>   | -2.0092561 | -1.0066615 | 2.0092561 | down | chr11:18344142-18388576 (+) // 97.16 // p15.1    |
| 233588_x_at | <i>PFDN6</i>    | -2.0092425 | -1.0066518 | 2.0092425 | down | chr6:33257548-33258709 (+) // 93.07 // p21.32    |
| 1555841_at  | <i>MSANTD3</i>  | -2.0092354 | -1.0066465 | 2.0092354 | down | chr9:103204430-103214014 (+) // 64.72 // q31.1   |
| 209276_s_at | <i>GLRX</i>     | -2.0091987 | -1.0066203 | 2.0091987 | down | chr5:95152210-95158366 (-) // 95.32 // q15       |
| 203808_at   |                 | -2.0090764 | -1.0065323 | 2.0090764 | down | chr19:40739468-40791262 (+) // 93.77 // q13.2    |
| 203825_at   | <i>BRD3</i>     | -2.0085452 | -1.0061508 | 2.0085452 | down | chr9:136897962-136918712 (-) // 94.13 // q34.2   |



|              |                           |            |            |           |      |                                                                                              |
|--------------|---------------------------|------------|------------|-----------|------|----------------------------------------------------------------------------------------------|
| 203289_s_at  | <i>NPRL3</i>              | -2.0084379 | -1.0060738 | 2.0084379 | down | chr16:134254-188859 (-) // 96.09 // p13.3                                                    |
| 232857_at    | <i>POLR3H</i>             | -2.008087  | -1.0058217 | 2.008087  | down | chr22:41913529-41940464 (-) // 94.55 // q13.2                                                |
| 1560599_a_at | <i>CEP89</i>              | -2.0072353 | -1.0052097 | 2.0072353 | down | chr19:33428486-33450966 (-) // 81.37 // q13.11                                               |
| 229045_at    | <i>SNX20</i>              | -2.006902  | -1.0049702 | 2.006902  | down | chr16:50707590-50715264 (-) // 99.07 // q12.1                                                |
| 225723_at    | <i>CCDC167</i>            | -2.0066683 | -1.0048022 | 2.0066683 | down | chr6:37450714-37467698 (-) // 82.19 // p21.2                                                 |
| 224812_at    | <i>HIBADH</i>             | -2.0064318 | -1.0046321 | 2.0064318 | down | chr7:27565060-27702486 (-) // 94.15 // p15.2                                                 |
| 235425_at    | <i>SGOL2</i>              | -2.0060697 | -1.0043716 | 2.0060697 | down | chr2:201435785-201436538 (+) // 96.99 // q33.1                                               |
|              |                           |            |            |           |      | chr2:96071126-96078879 (+) // 98.73 // q11.1///chr2:97749319-97757623 (-) // 97.45 // q11.2  |
| 222055_at    | <i>FAHD2A///FAHD2B/</i>   | -2.005719  | -1.0041195 | 2.005719  | down |                                                                                              |
| 226719_at    | <i>DERL2</i>              | -2.004654  | -1.0033532 | 2.004654  | down | chr17:5374578-5376564 (-) // 91.1 // p13.2                                                   |
| 1557984_s_at | <i>RPAP3</i>              | -2.0038428 | -1.0027694 | 2.0038428 | down | chr12:48082915-48096632 (-) // 80.77 // q13.11                                               |
| 208906_at    | <i>BSCL2///HNRNPUL2</i>   | -2.0037017 | -1.0026678 | 2.0037017 | down | chr11:62457752-62473766 (-) // 96.92 // q12.3                                                |
| 227139_s_at  | <i>HPS3</i>               | -2.0031    | -1.0022343 | 2.0031    | down | chr3:148871278-148890897 (+) // 93.87 // q24                                                 |
|              |                           |            |            |           |      | chr18:23748474-23751305 (-) // 48.75 // q11.2///chr5:79922693-79950363 (-) // 48.12 // q14.1 |
| 202532_s_at  | <i>DHFR</i>               | -2.00298   | -1.002148  | 2.00298   | down |                                                                                              |
| 1552315_at   | <i>GIMAP1</i>             | -2.0029328 | -1.002114  | 2.0029328 | down | chr7:150413698-150418881 (+) // 85.21 // q36.1                                               |
| 1553858_at   | <i>ZBTB3</i>              | -2.002787  | -1.002009  | 2.002787  | down | chr11:62518436-62521614 (-) // 67.79 // q12.3                                                |
| 1557302_at   | <i>ZNF585B</i>            | -2.0027559 | -1.0019865 | 2.0027559 | down | chr19:37672578-37674920 (-) // 61.77 // q13.12                                               |
| 228733_at    | <i>PUSL1</i>              | -2.0027542 | -1.0019854 | 2.0027542 | down | chr1:1246288-1247056 (+) // 94.8 // p36.33                                                   |
| 234863_x_at  | <i>FBXO5</i>              | -2.002594  | -1.0018699 | 2.002594  | down | chr6:153292331-153304176 (-) // 98.36 // q25.2                                               |
| 229122_x_at  | <i>NPRL3</i>              | -2.0021951 | -1.0015826 | 2.0021951 | down | chr16:136358-136852 (+) // 99.8 // p13.3                                                     |
| 201156_s_at  | <i>RAB5C</i>              | -2.0020878 | -1.0015053 | 2.0020878 | down | chr17:40276996-40307017 (-) // 68.79 // q21.2                                                |
| 219448_at    | <i>TMEM70</i>             | -2.0020242 | -1.0014594 | 2.0020242 | down | chr8:74888443-74895018 (+) // 98.01 // q21.11                                                |
| 223041_at    | <i>CD99L2</i>             | -2.0018716 | -1.0013494 | 2.0018716 | down | chrX:149934808-150067179 (-) // 98.63 // q28                                                 |
| 200874_s_at  | <i>MIR1292///NOP56///</i> | -2.0016387 | -1.0011816 | 2.0016387 | down | chr20:2633246-2639039 (+) // 96.48 // p13                                                    |
| 232675_s_at  | <i>UCKL1</i>              | -2.000995  | -1.0007175 | 2.000995  | down | chr20:62575964-62582456 (-) // 99.89 // q13.33                                               |
| 205317_s_at  | <i>SLC15A2</i>            | -2.0006132 | -1.0004423 | 2.0006132 | down | chr3:121613294-121660316 (+) // 99.59 // q13.33                                              |

|             |               |            |             |           |      |                                               |
|-------------|---------------|------------|-------------|-----------|------|-----------------------------------------------|
| 203385_at   | <i>DGKA</i>   | -2.0005956 | -1.0004296  | 2.0005956 | down | chr12:56330203-56347805 (+) // 99.14 // q13.2 |
| 228622_s_at | <i>DNAJC4</i> | -2.0004551 | -1.0003283  | 2.0004551 | down | chr11:63997800-64001752 (+) // 99.38 // q13.1 |
| 209153_s_at | <i>TCF3</i>   | -1.9863386 | -0.9901116  | 1.9863386 | down | chr19:1609292-1650277 (-) // 97.02 // p13.3   |
| 213730_x_at | <i>TCF3</i>   | -1.916746  | -0.9386592  | 1.916746  | down | chr19:1610736-1615797 (-) // 99.32 // p13.3   |
| 221969_at   | <i>PAX5</i>   | -1.8326387 | -0.87392247 | 1.8326387 | down | chr9:36833764-36835625 (-) // 93.95 // p13.2  |

## Legend for Supplementary Figures

### **Supplementary Figure 1. Additional genetic mutations in *ZNF384*-related fusion**

**gene-positive patients.** Additional genetic mutations in *ZNF384*-related fusion gene-positive patients detected by whole exome sequencing, whole transcriptome sequencing, and MLPA are presented as a diagram. All of the mutations described in the figure were confirmed by Sanger sequencing.

### **Supplementary Figure 2. Characteristics of gene expression profile in**

***TCF3-ZNF384*-positive ALL.** (A) A direct multigroup comparison of gene expression profile was performed by hierarchical clustering analysis. Using the selected classifying gene probe sets reported by Roberts et al., two-way hierarchical clustering was performed on the microarray data, including *TCF3-ZNF384*- (red), *EP300-ZNF384*- (magenta), *CREBBP-ZNF384*- (orange), *BCR-ABL1*- (green), *ETV6-RUNX1*- (gray), *MLL-AF4*- (yellow) and *TCF3-PBX1*-positive (blue) ALL. The results are displayed using a heat map as a dendrogram. We further confirmed that same analysis using the gene probe sets reported by Den Boer et al. showed identical result and could separate the major subtypes and

*ZNF384*-related fusion genes positive ALL in distinct clusters (data not shown). (B) After filtration as described in Supplementary Methods, two-way hierarchical clustering was performed on the microarray data of *TCF3-ZNF384*- (red), *EP300-ZNF384*- (magenta), *CREBBP-ZNF384*- (orange) and *TCF3-PBX1*-positive (blue) ALL. The results are displayed as in (A). (C) The microarray data of *TCF3-ZNF384*- and *TCF3-PBX1*-positive ALL were directly compared as described in Supplementary Methods. Two-way hierarchical clustering was performed on filtered microarray data of *TCF3-ZNF384*- (red) and *TCF3-PBX1*-positive (blue) ALL. The results are displayed as in (A). (D) Two-way hierarchical clustering was performed on the microarray data, including *ZNF384* wild-type (light blue), *BCR-ABL1*- (green), *ETV6-RUNX1*- (gray), *MLL-AF4*- (yellow) and *TCF3-PBX1*- (blue) positive ALL as in (A). (E) Two-way hierarchical clustering was performed on the microarray data of *TCF3-ZNF384*- (red), *EP300-ZNF384*- (magenta), *CREBBP-ZNF384*- (orange) positive and *ZNF384* wild-type (light blue) ALL as in (B). Since 21 out of 104 cases of *ZNF384* wild-type ALL were located in the same cluster as *ZNF384*-related fusion gene positive ALL, but not *ZNF384* wild-type, and thus some correlation between them by their gene expression signature was suggested, these *ZNF384* wild-type cases were excluded from following direct comparison between

*TCF3-ZNF384*-positive and *ZNF384* wild-type cases. (F) Two-way hierarchical clustering was performed on the microarray data of *TCF3-ZNF384*-positive and *ZNF384* wild-type ALL {83 out of 104 that located in the distinct cluster from that of *ZNF384*-related fusion gene positive ALL in (E)} (light blue) as in (C). (G) Gene set enrichment analysis (GSEA) for curated gene sets of hematopoietic precursors was performed of the differentially expressed genes between *TCF3-ZNF384*-positive (red) and *ZNF384* wild-type (light blue) ALL as in Figure 4 (C). Enrichment plots for the hematopoietic stem cells (HSC), multi-lymphoid progenitor (MLP), pro-B cell (Pro-B), early T-cell precursors (ETP), common myeloid progenitors (CMP), granulocyte-monocyte progenitor (GMP), and megakaryocyte-erythroid progenitor cell (MEP) signature are presented. Bold lines represent significant enrichments {false discovery rate (FDR)  $q$ -value $<0.25$  and/or nominal (NOM)  $p$ -value $<0.05$ }. NES, normalized enrichment score.

# Supplementary Figure 1

## A BCP-ALL-related abnormalities using WTS and WES in 126 genes

|                              |                 |                 | Case 4      | Case 5 | Case 7 | Case 13 | Case 14 | Case 15 | Case 17      | Case 18 | Case 19       | Case 20 | Case 22      |  |
|------------------------------|-----------------|-----------------|-------------|--------|--------|---------|---------|---------|--------------|---------|---------------|---------|--------------|--|
| Function                     | Gene            | AA change       | TCF3-ZNF384 |        |        |         |         |         | TAF15-ZNF384 |         | CREBBP ZNF384 |         | BMP2K ZNF384 |  |
| Kinase                       | <i>MYCN</i>     | A214E           |             |        |        |         |         |         |              |         |               |         |              |  |
| Signaling/<br>adhesion       | <i>NRAS</i>     | Q61P            |             |        |        |         |         |         |              |         |               |         |              |  |
|                              | <i>NRAS</i>     | G13V            |             |        |        |         |         |         |              |         |               |         |              |  |
|                              | <i>NRAS</i>     | G12D            |             |        |        |         |         |         |              |         |               |         |              |  |
|                              | <i>KRAS</i>     | S65I            |             |        |        |         |         |         |              |         |               |         |              |  |
|                              | <i>PTPN11</i>   | D61Y            |             |        |        |         |         |         |              |         |               |         |              |  |
|                              | <i>PTPN11</i>   | D61V            |             |        |        |         |         |         |              |         |               |         |              |  |
|                              | <i>PTPN11</i>   | A72V            |             |        |        |         |         |         |              |         |               |         |              |  |
|                              | <i>OBSCN</i>    | L3093P          |             |        |        |         |         |         |              |         |               |         |              |  |
|                              | <i>ADAMTS9</i>  | K451R           |             |        |        |         |         |         |              |         |               |         |              |  |
|                              | <i>VWDE</i>     | I301fs          |             |        |        |         |         |         |              |         |               |         |              |  |
|                              | <i>FAT4</i>     | T1742M          |             |        |        |         |         |         |              |         |               |         |              |  |
|                              | <i>KIAA1598</i> | Y569fs          |             |        |        |         |         |         |              |         |               |         |              |  |
|                              | <i>ACAN</i>     | R2270C          |             |        |        |         |         |         |              |         |               |         |              |  |
| <i>PREX2</i>                 | H1387Y          |                 |             |        |        |         |         |         |              |         |               |         |              |  |
| Epigenetic<br>regulator      | <i>EZH2</i>     | R684C           |             |        |        |         |         |         |              |         |               |         |              |  |
|                              | <i>MLL2</i>     | Q4219X          |             |        |        |         |         |         |              |         |               |         |              |  |
|                              | <i>MLL2</i>     | R2685fs         |             |        |        |         |         |         |              |         |               |         |              |  |
|                              | <i>MLL2</i>     | p.3910-3912del  |             |        |        |         |         |         |              |         |               |         |              |  |
|                              | <i>MLL2</i>     | R5086X          |             |        |        |         |         |         |              |         |               |         |              |  |
|                              | <i>ASH1L</i>    | R2582C          |             |        |        |         |         |         |              |         |               |         |              |  |
| Transcriptional<br>regulator | <i>ASH1L</i>    | S726N           |             |        |        |         |         |         |              |         |               |         |              |  |
|                              | <i>TRERF1</i>   | E846G           |             |        |        |         |         |         |              |         |               |         |              |  |
|                              | <i>MED12</i>    | p.2096-2096 del |             |        |        |         |         |         |              |         |               |         |              |  |
| Structural<br>protein        | <i>PTPRD</i>    | N1023fs         |             |        |        |         |         |         |              |         |               |         |              |  |
|                              | <i>KRT18</i>    | R381H           |             |        |        |         |         |         |              |         |               |         |              |  |
|                              | <i>COL14A1</i>  | E1202K          |             |        |        |         |         |         |              |         |               |         |              |  |
| Others                       | <i>MUC12</i>    | S4123Y          |             |        |        |         |         |         |              |         |               |         |              |  |
|                              | <i>DNAH5</i>    | L861F           |             |        |        |         |         |         |              |         |               |         |              |  |
|                              | <i>NBPF10</i>   | A119V           |             |        |        |         |         |         |              |         |               |         |              |  |
|                              | <i>NUDT17</i>   | W164R           |             |        |        |         |         |         |              |         |               |         |              |  |
|                              | <i>UNC80</i>    | p.756-760 del   |             |        |        |         |         |         |              |         |               |         |              |  |

AA: Amino acid, del: deletion.

## B BCP-ALL-related abnormalities using MLPA analysis

| Function                     | Gene              | Case 1      | Case 2 | Case 3 | Case 4         | Case 5 | Case 6 | Case 7 | Case 9 | Case 11 | Case 12 | Case 13 | Case 17      | Case 19       | Case 20 |     |
|------------------------------|-------------------|-------------|--------|--------|----------------|--------|--------|--------|--------|---------|---------|---------|--------------|---------------|---------|-----|
|                              |                   | TCF3-ZNF384 |        |        |                |        |        |        |        |         |         |         | TAF15-ZNF384 | CREBBP-ZNF384 |         |     |
| Transcriptional<br>regulator | <i>IKZF1</i> del  | CN2         | CN2    | CN2    | CN2            | CN2    | CN2    | CN2    | CN2    | CN2     | CN2     | CN2     | CN2          | CN2           | CN2     |     |
|                              | <i>PAX5</i> del   | CN2         | CN2    | CN2    | CN2            | CN2    | CN2    | CN2    | CN2    | CN2     | CN2     | CN2     | CN2          | CN2           | CN2     |     |
|                              | <i>EBF1</i> del   | CN2         | CN2    | CN2    | CN2            | CN2    | CN2    | CN2    | CN2    | CN2     | CN2     | CN2     | CN2          | CN2           | CN2     |     |
|                              | <i>ERG</i> del    | CN2         | CN2    | CN2    | CN2            | CN2    | CN2    | ND     | CN2    | CN2     | CN2     | ND      | CN2          | CN2           | CN2     | ND  |
| Cell cycle                   | <i>CDKN2A</i> del | CN2         | CN2    | CN2    | CN2            | CN2    | CN2    | CN2    | CN2    | CN2     | CN0     | CN2     | CN2          | CN2           | CN0     | CN2 |
|                              | <i>CDKN2B</i> del | CN2         | CN2    | CN2    | CN2            | CN2    | CN2    | CN2    | CN2    | CN2     | CN0     | CN2     | CN2          | CN2           | CN0     | CN2 |
|                              | <i>RB1</i> del    | CN2         | CN2    | CN2    | ex19-26<br>CN0 | CN2    | CN2    | CN2    | CN2    | CN2     | CN2     | CN2     | CN2          | CN2           | CN2     | CN2 |
|                              | <i>BTG1</i> del   | CN2         | CN2    | CN2    | CN2            | CN2    | CN2    | CN2    | CN2    | CN2     | CN2     | CN2     | CN2          | CN2           | CN2     | CN2 |
| Signaling/<br>adhesion       | <i>SH2B3</i> del  | CN2         | CN2    | CN2    | CN2            | CN3    | ND     | CN2    | CN2    | ND      | ND      | CN2     | CN2          | CN2           | ND      |     |
|                              | iAMP21            | CN2         | CN2    | CN2    | CN2            | CN3    | ND     | CN3    | CN2    | CN2     | ND      | CN3     | CN2          | CN3           | ND      |     |

NA: not analyzed, ex: exon, CN0: homozygous deletion, CN1: heterozygous deletion, CN2: normal copy number, CN3: duplication.

# Supplementary Figure 2

A

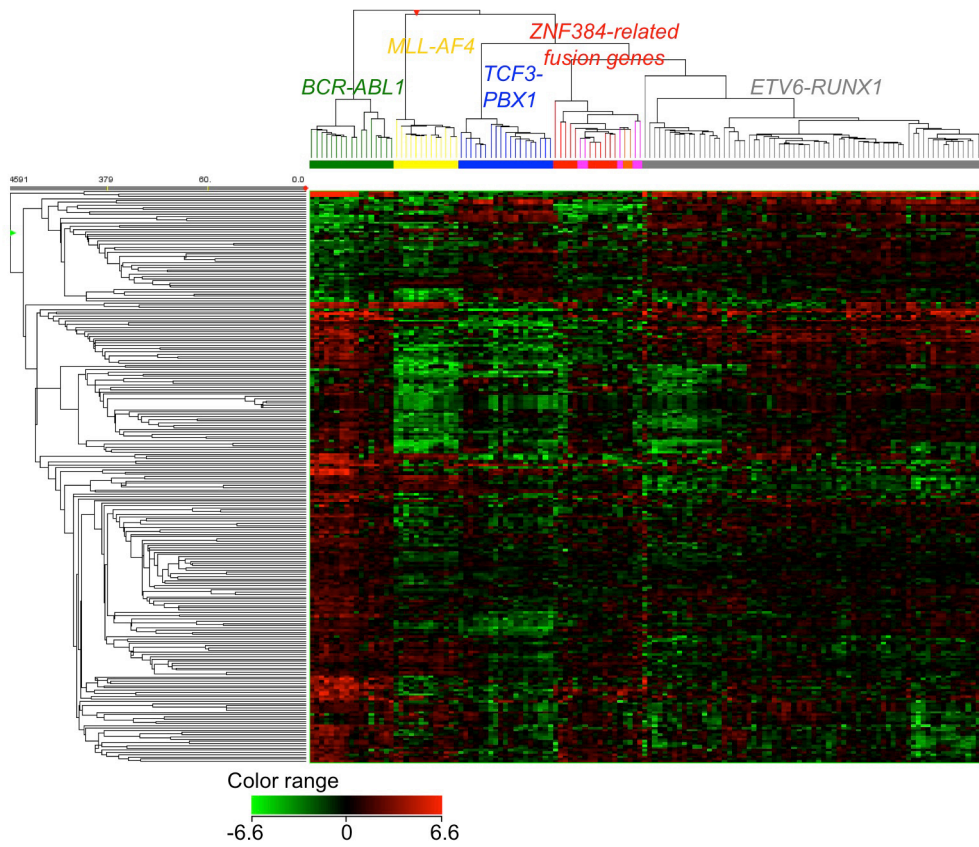

B

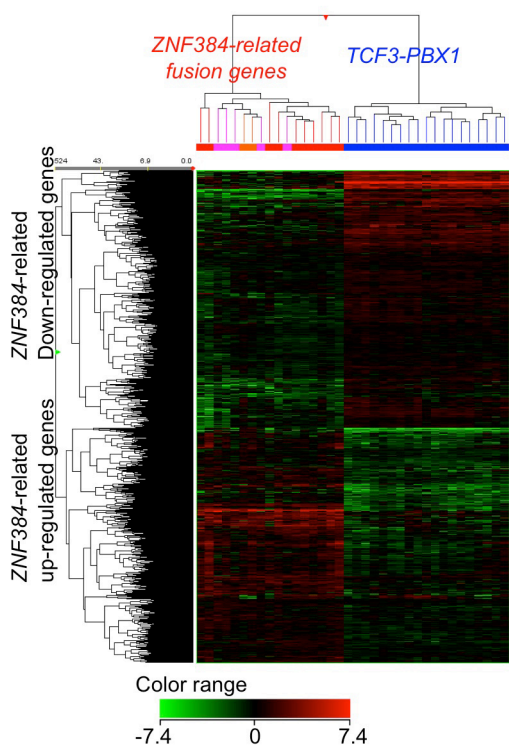

C

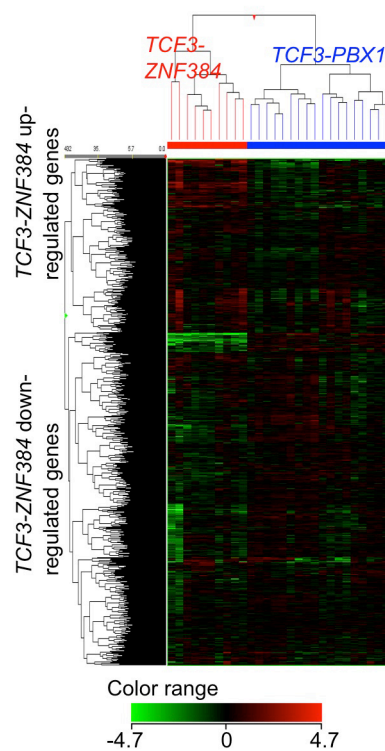

## Supplementary Figure 2

D

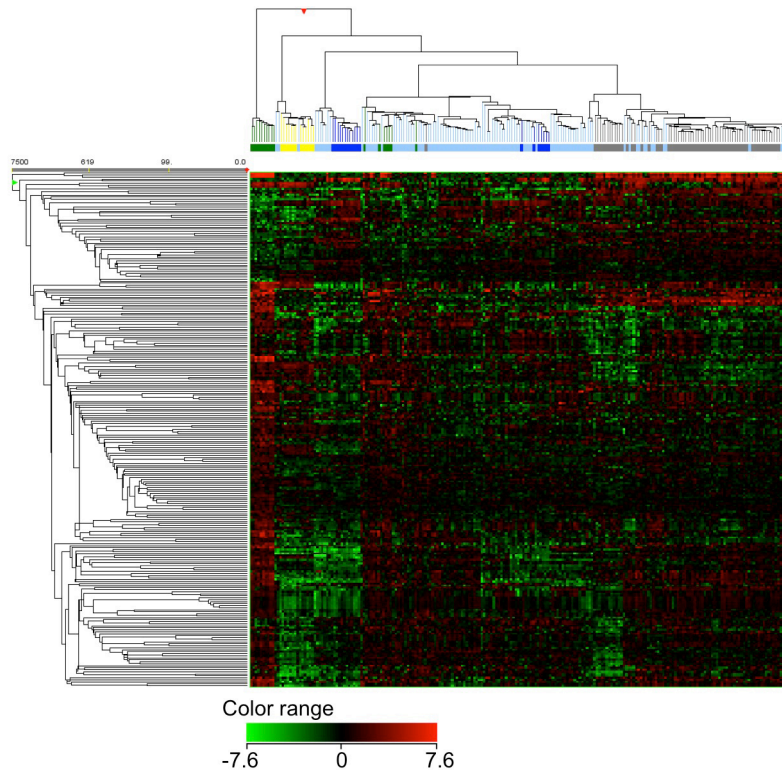

E

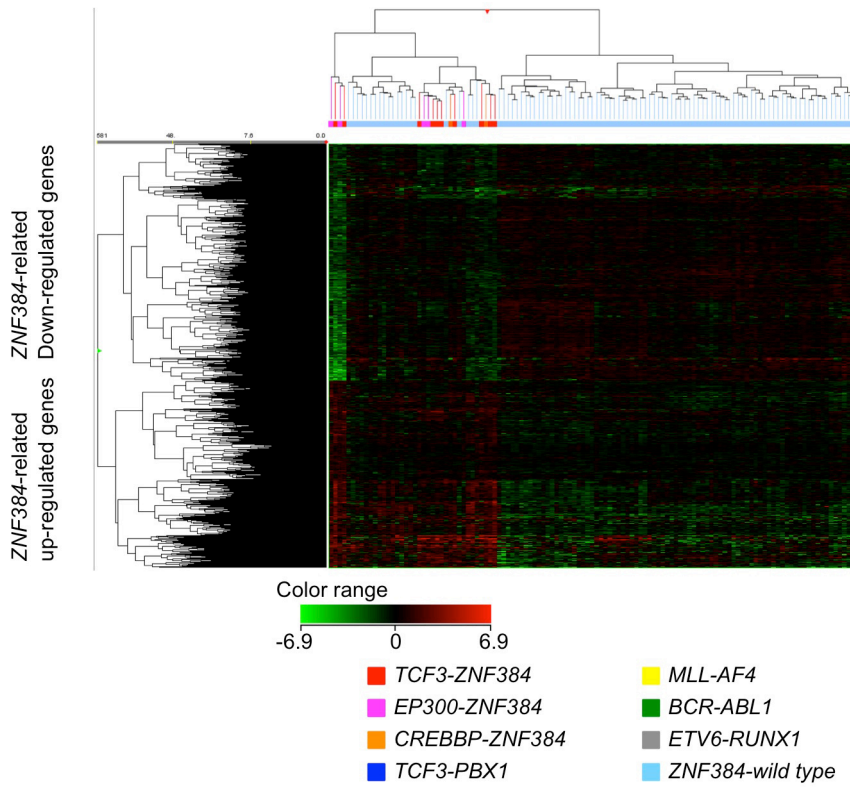



# Supplementary Figure 2

F

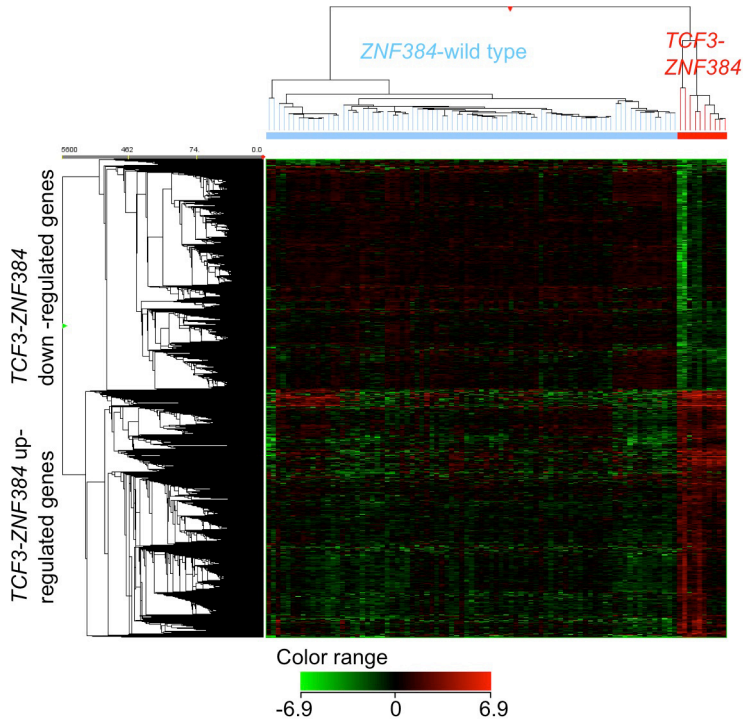

G

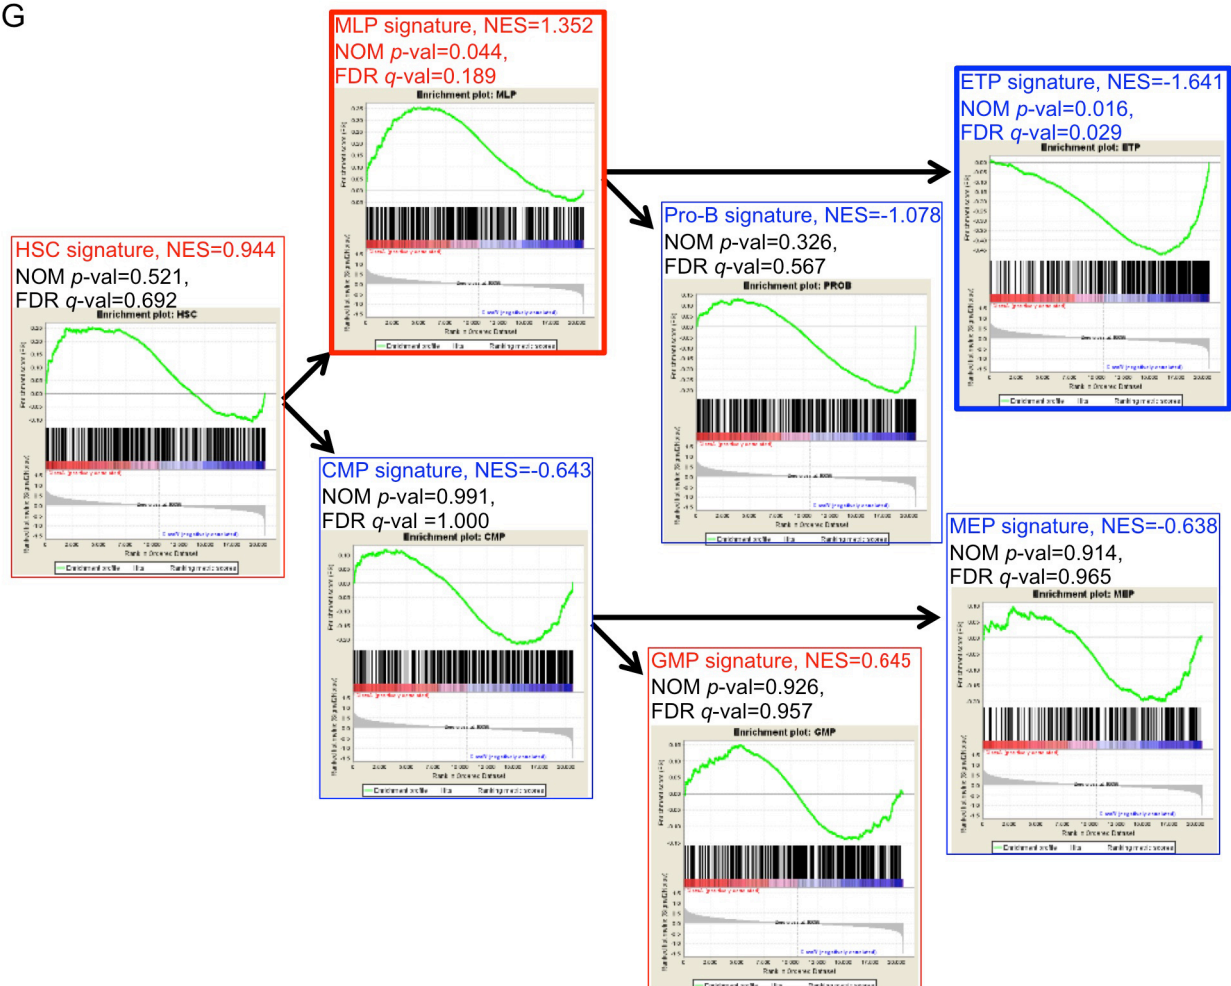

Supplement: 2016.151035.HIRABAYASHI_SUPPL.pdf [file 2016.151035.HIRABAYASHI_SUPPL.pdf]
